# Supplementary material for: Origin and Deep Evolution of Human Endogenous Retroviruses in Pan-Primates
Source: MDPI journal article supplement (doi:10.3390/v14071370), 2022-06-23
Supplement: s1 [file s1]

## **Supplementary data of “Origin and deep evolution of human endogenous retroviruses in pan-primates”**

|                                                                                                                                     |     |
|-------------------------------------------------------------------------------------------------------------------------------------|-----|
| Supplementary data of “Origin and deep evolution of human endogenous retroviruses in pan-primates”                                  | 1   |
| Supplementary data S1 The common name, scientific name and classification of each primate we analyzed in this research.....         | 2   |
| Supplementary data S2 The loci of each HERV we identified in the genomes of 49 primates .....                                       | 4   |
| Supplementary data S3 The vertical transmission events in human genomes .....                                                       | 247 |
| Supplementary data S4 The alignments of the 5LTR and flanking sequences of a widely vertical transmitted HERV-H in 17 species ..... | 252 |
| Supplementary data S5 The alignments of the 3LTR and flanking sequences of a widely vertical transmitted HERV-H in 17 species ..... | 267 |
| Supplementary data S6 The alignments of the internal sequences of a widely vertical transmitted HERV-H in 17 species .....          | 282 |
| Supplementary data S7 The LTRs’ blastn results of possible HERVs which were involved in host gene recombination .....               | 316 |
| Supplementary data S8 The alignments of the 5LTR sequences of HERV in Figure 2B .....                                               | 346 |
| Supplementary data S9 The alignments of the 3LTR sequences of HERV in Figure 2B .....                                               | 347 |
| Supplementary data S10 The relationship between HERVs in human genomes and Human ncRNA .                                            | 348 |

**Supplementary data S1 The common name, scientific name and classification of each primate we analyzed in this research**

| <b>Common name</b>         | <b>Scientific name</b>              | <b>Classification</b> |
|----------------------------|-------------------------------------|-----------------------|
| Slender Loris              | <i>Loris tardigradus</i>            | prosimii              |
| Pygmy Slow Loris           | <i>Nycticebus pygmaeus</i>          | prosimii              |
| Bengal Slow Loris          | <i>Nycticebus bengalensis</i>       | prosimii              |
| Small-Eared Galago         | <i>Otolemur garnettii</i>           | prosimii              |
| Moholi Bushbaby            | <i>Galago moholi</i>                | prosimii              |
| Aye-Aye                    | <i>Daubentonia madagascariensis</i> | prosimii              |
| Gray Mouse Lemur           | <i>Microcebus murinus</i>           | prosimii              |
| Greater Bamboo Lemur       | <i>Prolemur simus</i>               | prosimii              |
| Ring-Tailed Lemur          | <i>Lemur catta</i>                  | prosimii              |
| White-Faced Saki           | <i>Pithecia pithecia</i>            | new world monkey      |
| Midas Tamarin              | <i>Saguinus midas</i>               | new world monkey      |
| White-Tufted-Ear Marmoset  | <i>Callithrix jacchus</i>           | new world monkey      |
| Ma'S Night Monkey          | <i>Aotus nancymae</i>               | new world monkey      |
| White-Fronted Capuchin     | <i>Cebus albifrons</i>              | new world monkey      |
| Tufted Capuchin            | <i>Sapajus apella</i>               | new world monkey      |
| Black-Handed Spider Monkey | <i>Ateles geoffroyi</i>             | new world monkey      |
| Drill Mandrillus           | <i>leucophaeus</i>                  | old world monkey      |
| Mandrill                   | <i>Mandrillus sphinx</i>            | old world monkey      |
| Sooty Mangabey             | <i>Cercocebus atys</i>              | old world monkey      |
| Hamadryas Baboon           | <i>Papio hamadryas</i>              | old world monkey      |
| Olive Baboon               | <i>Papio anubis</i>                 | old world monkey      |
| Gelada                     | <i>Theropithecus gelada</i>         | old world monkey      |
| Black Crested Mangabey     | <i>Lophocebus aterrimus</i>         | old world monkey      |
| Rhesus Monkey              | <i>Macaca mulatta</i>               | old world monkey      |
| Assam Macaque              | <i>Macaca assamensis</i>            | old world monkey      |
| Liontail Macaque           | <i>Macaca silenus</i>               | old world monkey      |
| Pig-Tailed Macaque         | <i>Macaca nemestrina</i>            | old world monkey      |
| Red Guenon                 | <i>Erythrocebus patas</i>           | old world monkey      |
| Grivet                     | <i>Chlorocebus aethiops</i>         | old world monkey      |
| Green Monkey               | <i>Chlorocebus sabaeus</i>          | old world monkey      |
| Sykes' Monkey              | <i>Cercopithecus albogularis</i>    | old world monkey      |
| Mona Monkey                | <i>Cercopithecus mona</i>           | old world monkey      |
| Golden Snub-Nosed Monkey   | <i>Rhinopithecus roxellana</i>      | old world monkey      |
| Burmese Snub-Nosed Monkey  | <i>Rhinopithecus strykeri</i>       | old world monkey      |
| Black-Shanked Douc Langur  | <i>Pygathrix nigripes</i>           | old world monkey      |
| Phayre'S Leaf Monkey       | <i>Trachypithecus crepusculus</i>   | old world monkey      |
| Ugandan Red Colobus        | <i>Piliocolobus tephrosceles</i>    | old world monkey      |
| Angolan colobus            | <i>Colobus angolensis palliatus</i> | old world monkey      |
| Mantled Guereza            | <i>Colobus guereza</i>              | old world monkey      |

Pileated Gibbon      *Hylobates pileatus*    ape  
 Siamang   *Symphalangus syndactylus*      ape  
 Eastern Hoolock Gibbon   *Hoolock leuconedys*   ape  
 Southern White-Cheeked Gibbon    *Nomascus siki*   ape  
 Western Lowland Gorilla   *Gorilla gorilla gorilla*      ape  
 Chimpanzee    *Pan troglodytes*   ape  
 Pygmy Chimpanzee   *Pan paniscus*    ape  
 Human    *Homo sapiens*    ape  
 Sumatran Orangutan   *Pongo abelii*    ape  
 Bornean Orangutan   *Pongo pygmaeus*    ape

**Supplementary data S2 The loci of each HERV we identified in the genomes of 49 primates**

| <b>Chr/contig</b>          | <b>startend</b>   | <b>HERV&amp;domain</b> | <b>strand</b> |
|----------------------------|-------------------|------------------------|---------------|
| Aotus_nancymaae_KZ196745.1 | 6462506 6462809   | HERVIPADP_5LTR         | +             |
| Aotus_nancymaae_KZ196745.1 | 6465555 6468407   | HERVIPADP_pol          | +             |
| Aotus_nancymaae_KZ196745.1 | 6470666 6471049   | HERVIPADP_env          | +             |
| Aotus_nancymaae_KZ196745.1 | 6471355 6471661   | HERVIPADP_3LTR         | +             |
| Aotus_nancymaae_KZ203894.1 | 2822626 2822960   | HERVHF_5LTR            | -             |
| Aotus_nancymaae_KZ203894.1 | 2823470 2824845   | HERVHF_pol             | -             |
| Aotus_nancymaae_KZ203894.1 | 2825275 2825961   | HERVHF_gag             | -             |
| Aotus_nancymaae_KZ203894.1 | 2830884 2831226   | HERVHF_3LTR            | -             |
| Aotus_nancymaae_KZ204317.1 | 11552841 11553166 | HERVHF_5LTR            | +             |
| Aotus_nancymaae_KZ204317.1 | 11556883 11558726 | HERVHF_pol             | +             |
| Aotus_nancymaae_KZ204317.1 | 11561301 11561639 | HERVHF_3LTR            | +             |
| Atele_fuscicepstarseq_144  | 8885967 8886442   | HERVHF_5LTR            | +             |
| Atele_fuscicepstarseq_144  | 8888365 8888913   | HERVHF_gag             | +             |
| Atele_fuscicepstarseq_144  | 8889823 8891698   | HERVHF_pol             | +             |
| Atele_fuscicepstarseq_144  | 8892536 8893022   | HERVHF_3LTR            | +             |
| Atele_fuscicepstarseq_148  | 3665123 3665631   | HERVHF_5LTR            | -             |
| Atele_fuscicepstarseq_148  | 3667488 3670180   | HERVHF_pol             | -             |
| Atele_fuscicepstarseq_148  | 3671284 3671622   | HERVHF_gag             | -             |
| Atele_fuscicepstarseq_148  | 3672683 3673201   | HERVHF_3LTR            | -             |
| Atele_fuscicepstarseq_2063 | 47185985 47186354 | HERVHF_5LTR            | -             |
| Atele_fuscicepstarseq_2063 | 47186645 47187378 | HERVHF_env             | -             |
| Atele_fuscicepstarseq_2063 | 47188382 47189005 | HERVHF_pol             | -             |
| Atele_fuscicepstarseq_2063 | 47189430 47189810 | HERVHF_pro             | -             |
| Atele_fuscicepstarseq_2063 | 47189844 47190265 | HERVHF_gag             | -             |
| Atele_fuscicepstarseq_2063 | 47191563 47191917 | HERVHF_3LTR            | -             |
| Atele_fuscicepstarseq_2082 | 23074918 23075313 | HERVHF_5LTR            | +             |
| Atele_fuscicepstarseq_2082 | 23078691 23079410 | HERVHF_pol             | +             |
| Atele_fuscicepstarseq_2082 | 23080247 23080629 | HERVHF_3LTR            | +             |
| Atele_fuscicepstarseq_2722 | 7528869 7529338   | HERVHF_5LTR            | -             |
| Atele_fuscicepstarseq_2722 | 7533118 7535167   | HERVHF_pol             | -             |
| Atele_fuscicepstarseq_2722 | 7535170 7535694   | HERVHF_pro             | -             |
| Atele_fuscicepstarseq_2722 | 7536024 7536617   | HERVHF_gag             | -             |
| Atele_fuscicepstarseq_2722 | 7538067 7538535   | HERVHF_3LTR            | -             |
| Atele_fuscicepstarseq_577  | 37646577 37646921 | Unknown_HERV_5LTR      | +             |
| Atele_fuscicepstarseq_577  | 37654083 37654670 | Unknown_HERV_gag       | +             |
| Atele_fuscicepstarseq_577  | 37654884 37655444 | Unknown_HERV_pro       | +             |
| Atele_fuscicepstarseq_577  | 37654998 37656101 | Unknown_HERV_pol       | +             |
| Atele_fuscicepstarseq_577  | 37658162 37658521 | Unknown_HERV_3LTR      | +             |
| Atele_fuscicepstarseq_588  | 2045392 2045706   | HERVHF_5LTR            | +             |
| Atele_fuscicepstarseq_588  | 2046909 2047505   | HERVHF_gag             | +             |
| Atele_fuscicepstarseq_588  | 2048103 2050228   | HERVHF_pol             | +             |

|                            |           |          |                   |   |
|----------------------------|-----------|----------|-------------------|---|
| Atele_fuscicepstarseq_588  | 2051013   | 2052102  | HERVHF_env        | + |
| Atele_fuscicepstarseq_588  | 2052567   | 2052884  | HERVHF_3LTR       | + |
| Atele_fuscicepstarseq_6    | 53390673  | 53391027 | Unknown_HERV_5LTR | + |
| Atele_fuscicepstarseq_6    | 53392738  | 53395088 | Unknown_HERV_pol  | + |
| Atele_fuscicepstarseq_6    | 53395581  | 53395945 | Unknown_HERV_3LTR | + |
| Atele_fuscicepstarseq_857  | 13665434  | 13665774 | HERVHF_5LTR       | - |
| Atele_fuscicepstarseq_857  | 13668205  | 13669126 | HERVHF_env        | - |
| Atele_fuscicepstarseq_857  | 13669197  | 13669772 | HERVHF_pol        | - |
| Atele_fuscicepstarseq_857  | 13670232  | 13670789 | HERVHF_pro        | - |
| Atele_fuscicepstarseq_857  | 13670879  | 13671214 | HERVHF_gag        | - |
| Atele_fuscicepstarseq_857  | 13675042  | 13675393 | HERVHF_3LTR       | - |
| Cebus_albifrons_Contig13   | 33676470  | 33676810 | HERVHF_5LTR       | + |
| Cebus_albifrons_Contig13   | 33679764  | 33681718 | HERVHF_pol        | + |
| Cebus_albifrons_Contig13   | 33684029  | 33684371 | HERVHF_3LTR       | + |
| Cebus_albifrons_Contig14   | 1051783   | 1052334  | HERVHF_5LTR       | + |
| Cebus_albifrons_Contig14   | 1054942   | 1055250  | HERVHF_gag        | + |
| Cebus_albifrons_Contig14   | 1055450   | 1056190  | HERVHF_pro        | + |
| Cebus_albifrons_Contig14   | 1055798   | 1056852  | HERVHF_pol        | + |
| Cebus_albifrons_Contig14   | 1058627   | 1059185  | HERVHF_3LTR       | + |
| Cebus_albifrons_Contig2    | 16808811  | 16809455 | HSERVIII_5LTR     | - |
| Cebus_albifrons_Contig2    | 16813252  | 16814124 | HSERVIII_pol      | - |
| Cebus_albifrons_Contig2    | 16814851  | 16815495 | HSERVIII_3LTR     | - |
| Cebus_albifrons_Contig2    | 52232669  | 52232973 | HERVHF_5LTR       | + |
| Cebus_albifrons_Contig2    | 52235146  | 52235511 | HERVHF_gag        | + |
| Cebus_albifrons_Contig2    | 52236088  | 52236690 | HERVHF_pro        | + |
| Cebus_albifrons_Contig2    | 52236307  | 52238691 | HERVHF_pol        | + |
| Cebus_albifrons_Contig2    | 52239880  | 52240189 | HERVHF_3LTR       | + |
| Cebus_albifrons_Contig323  | 498717    | 499055   | HERVHF_5LTR       | - |
| Cebus_albifrons_Contig323  | 500759    | 503896   | HERVHF_pol        | - |
| Cebus_albifrons_Contig323  | 506453    | 506791   | HERVHF_3LTR       | - |
| Cebus_albifrons_Contig64   | 4161196   | 4161500  | HERVK_5LTR        | - |
| Cebus_albifrons_Contig64   | 4166588   | 4168631  | HERVK_pol         | - |
| Cebus_albifrons_Contig64   | 4170062   | 4170366  | HERVK_3LTR        | - |
| Cercocebus_atys_KQ009612.1 | 41964700  |          | HERVK_5LTR        | + |
| Cercocebus_atys_KQ009612.1 | 56206186  |          | HERVK_gag         | + |
| Cercocebus_atys_KQ009612.1 | 62037029  |          | HERVK_pro         | + |
| Cercocebus_atys_KQ009612.1 | 68858559  |          | HERVK_pol         | + |
| Cercocebus_atys_KQ009612.1 | 90829408  |          | HERVK_env         | + |
| Cercocebus_atys_KQ009612.1 | 966410168 |          | HERVK_3LTR        | + |
| Cercocebus_atys_KQ009636.1 | 285669    | 286009   | HERVK_5LTR        | + |
| Cercocebus_atys_KQ009636.1 | 287520    | 288212   | HERVK_pro         | + |
| Cercocebus_atys_KQ009636.1 | 288223    | 290132   | HERVK_pol         | + |
| Cercocebus_atys_KQ009636.1 | 290619    | 290954   | HERVK_env         | + |
| Cercocebus_atys_KQ009636.1 | 291500    | 291848   | HERVK_3LTR        | + |

|                               |         |         |               |   |
|-------------------------------|---------|---------|---------------|---|
| Cercopithecus_atys_KQ009831.1 | 6997557 | 6997877 | HSERVIII_5LTR | - |
| Cercopithecus_atys_KQ009831.1 | 6999122 | 7001999 | HSERVIII_pol  | - |
| Cercopithecus_atys_KQ009831.1 | 7004066 | 7004384 | HSERVIII_3LTR | - |
| Cercopithecus_atys_KQ009832.1 | 2600850 | 2601300 | HERVHF_5LTR   | - |
| Cercopithecus_atys_KQ009832.1 | 2601770 | 2603458 | HERVHF_pol    | - |
| Cercopithecus_atys_KQ009832.1 | 2603457 | 2603798 | HERVHF_pro    | - |
| Cercopithecus_atys_KQ009832.1 | 2605865 | 2606319 | HERVHF_3LTR   | - |
| Cercopithecus_atys_KQ009853.1 | 833045  | 833374  | HERVHF_5LTR   | - |
| Cercopithecus_atys_KQ009853.1 | 834396  | 836409  | HERVHF_pol    | - |
| Cercopithecus_atys_KQ009853.1 | 835852  | 836652  | HERVHF_pro    | - |
| Cercopithecus_atys_KQ009853.1 | 836705  | 837046  | HERVHF_gag    | - |
| Cercopithecus_atys_KQ009853.1 | 838494  | 838813  | HERVHF_3LTR   | - |
| Cercopithecus_atys_KQ009918.1 | 6809356 | 6809797 | HERVHF_5LTR   | - |
| Cercopithecus_atys_KQ009918.1 | 6810346 | 6810729 | HERVHF_env    | - |
| Cercopithecus_atys_KQ009918.1 | 6810730 | 6812378 | HERVHF_pol    | - |
| Cercopithecus_atys_KQ009918.1 | 6811740 | 6812525 | HERVHF_pro    | - |
| Cercopithecus_atys_KQ009918.1 | 6812575 | 6812892 | HERVHF_gag    | - |
| Cercopithecus_atys_KQ009918.1 | 6814537 | 6814982 | HERVHF_3LTR   | - |
| Cercopithecus_atys_KQ010004.1 | 3852813 | 3853153 | HERVHF_5LTR   | - |
| Cercopithecus_atys_KQ010004.1 | 3853631 | 3855575 | HERVHF_pol    | - |
| Cercopithecus_atys_KQ010004.1 | 3855886 | 3856206 | HERVHF_gag    | - |
| Cercopithecus_atys_KQ010004.1 | 3859140 | 3859487 | HERVHF_3LTR   | - |
| Cercopithecus_atys_KQ010004.1 | 8289803 | 8290204 | HERVHF_5LTR   | - |
| Cercopithecus_atys_KQ010004.1 | 8291090 | 8293012 | HERVHF_pol    | - |
| Cercopithecus_atys_KQ010004.1 | 8292903 | 8293412 | HERVHF_pro    | - |
| Cercopithecus_atys_KQ010004.1 | 8293473 | 8293778 | HERVHF_gag    | - |
| Cercopithecus_atys_KQ010004.1 | 8294490 | 8294877 | HERVHF_3LTR   | - |
| Cercopithecus_atys_KQ010015.1 | 969093  | 969447  | HERVHF_5LTR   | + |
| Cercopithecus_atys_KQ010015.1 | 970825  | 971166  | HERVHF_gag    | + |
| Cercopithecus_atys_KQ010015.1 | 971305  | 972396  | HERVHF_pro    | + |
| Cercopithecus_atys_KQ010015.1 | 972037  | 974384  | HERVHF_pol    | + |
| Cercopithecus_atys_KQ010015.1 | 976005  | 976370  | HERVHF_3LTR   | + |
| Cercopithecus_atys_KQ010089.1 | 3585511 | 3585893 | HERVHF_5LTR   | - |
| Cercopithecus_atys_KQ010089.1 | 3590420 | 3592958 | HERVHF_pol    | - |
| Cercopithecus_atys_KQ010089.1 | 3593546 | 3594256 | HERVHF_gag    | - |
| Cercopithecus_atys_KQ010089.1 | 3595669 | 3596056 | HERVHF_3LTR   | - |
| Cercopithecus_atys_KQ010415.1 | 1927089 | 1927498 | HERVHF_5LTR   | - |
| Cercopithecus_atys_KQ010415.1 | 1927664 | 1928014 | HERVHF_env    | - |
| Cercopithecus_atys_KQ010415.1 | 1928331 | 1930837 | HERVHF_pol    | - |
| Cercopithecus_atys_KQ010415.1 | 1930561 | 1931022 | HERVHF_pro    | - |
| Cercopithecus_atys_KQ010415.1 | 1931086 | 1931547 | HERVHF_gag    | - |
| Cercopithecus_atys_KQ010415.1 | 1933137 | 1933538 | HERVHF_3LTR   | - |
| Cercopithecus_atys_KQ010443.1 | 5394267 | 5394635 | HERVHF_5LTR   | + |
| Cercopithecus_atys_KQ010443.1 | 5396669 | 5397277 | HERVHF_pro    | + |

|                            |          |          |             |   |
|----------------------------|----------|----------|-------------|---|
| Cercocebus_atys_KQ010443.1 | 5397151  | 5399070  | HERVHF_pol  | + |
| Cercocebus_atys_KQ010443.1 | 5399940  | 5400298  | HERVHF_3LTR | + |
| Cercocebus_atys_KQ010523.1 | 1433937  | 1434260  | HERVHF_5LTR | - |
| Cercocebus_atys_KQ010523.1 | 1434881  | 1437319  | HERVHF_pol  | - |
| Cercocebus_atys_KQ010523.1 | 1437537  | 1438118  | HERVHF_pro  | - |
| Cercocebus_atys_KQ010523.1 | 1439857  | 1440188  | HERVHF_3LTR | - |
| Cercocebus_atys_KQ010541.1 | 2149201  | 2149603  | HERVHF_5LTR | + |
| Cercocebus_atys_KQ010541.1 | 2151721  | 2152470  | HERVHF_pro  | + |
| Cercocebus_atys_KQ010541.1 | 2151973  | 2152641  | HERVHF_pol  | + |
| Cercocebus_atys_KQ010541.1 | 2153565  | 2154327  | HERVHF_env  | + |
| Cercocebus_atys_KQ010541.1 | 2154512  | 2154909  | HERVHF_3LTR | + |
| Cercocebus_atys_KQ010562.1 | 1772858  | 1773218  | HERVHF_5LTR | - |
| Cercocebus_atys_KQ010562.1 | 1774587  | 1777089  | HERVHF_pol  | - |
| Cercocebus_atys_KQ010562.1 | 1776550  | 1777089  | HERVHF_pro  | - |
| Cercocebus_atys_KQ010562.1 | 1778217  | 1778588  | HERVHF_3LTR | - |
| Cercocebus_atys_KQ010602.1 | 3428960  | 3429399  | HERVK_5LTR  | + |
| Cercocebus_atys_KQ010602.1 | 3430200  | 3431426  | HERVK_pro   | + |
| Cercocebus_atys_KQ010602.1 | 3431019  | 3431750  | HERVK_pol   | + |
| Cercocebus_atys_KQ010602.1 | 3433032  | 3433467  | HERVK_3LTR  | + |
| Cercocebus_atys_KQ010662.1 | 6715481  | 6715804  | HERVHF_5LTR | + |
| Cercocebus_atys_KQ010662.1 | 6718179  | 6718502  | HERVHF_gag  | + |
| Cercocebus_atys_KQ010662.1 | 6718519  | 6719181  | HERVHF_pro  | + |
| Cercocebus_atys_KQ010662.1 | 6718780  | 6720829  | HERVHF_pol  | + |
| Cercocebus_atys_KQ010662.1 | 6721277  | 6721604  | HERVHF_3LTR | + |
| Cercocebus_atys_KQ010662.1 | 9059382  | 9059788  | HERVHF_5LTR | - |
| Cercocebus_atys_KQ010662.1 | 9059954  | 9067526  | HERVHF_env  | - |
| Cercocebus_atys_KQ010662.1 | 9067973  | 9070399  | HERVHF_pol  | - |
| Cercocebus_atys_KQ010662.1 | 9069878  | 9070678  | HERVHF_pro  | - |
| Cercocebus_atys_KQ010662.1 | 9073317  | 9073723  | HERVHF_3LTR | - |
| Cercocebus_atys_KQ010752.1 | 19978952 | 19979329 | HERVHF_5LTR | - |
| Cercocebus_atys_KQ010752.1 | 19980196 | 19982388 | HERVHF_pol  | - |
| Cercocebus_atys_KQ010752.1 | 19981813 | 19982652 | HERVHF_pro  | - |
| Cercocebus_atys_KQ010752.1 | 19982696 | 19983016 | HERVHF_gag  | - |
| Cercocebus_atys_KQ010752.1 | 19984496 | 19984872 | HERVHF_3LTR | - |
| Cercocebus_atys_KQ010796.1 | 3522236  | 3522598  | HERVHF_5LTR | - |
| Cercocebus_atys_KQ010796.1 | 3523635  | 3524075  | HERVHF_pol  | - |
| Cercocebus_atys_KQ010796.1 | 3524222  | 3524629  | HERVHF_pro  | - |
| Cercocebus_atys_KQ010796.1 | 3524622  | 3525227  | HERVHF_gag  | - |
| Cercocebus_atys_KQ010796.1 | 3526491  | 3526840  | HERVHF_3LTR | - |
| Cercocebus_atys_KQ010807.1 | 387332   | 387691   | HERVHF_5LTR | + |
| Cercocebus_atys_KQ010807.1 | 389745   | 390494   | HERVHF_pro  | + |
| Cercocebus_atys_KQ010807.1 | 390363   | 392313   | HERVHF_pol  | + |
| Cercocebus_atys_KQ010807.1 | 392788   | 393141   | HERVHF_3LTR | + |
| Cercocebus_atys_KQ010817.1 | 876464   | 876794   | HERVHF_5LTR | + |

|                            |          |          |             |   |
|----------------------------|----------|----------|-------------|---|
| Cercocebus_atys_KQ010817.1 | 879206   | 879904   | HERVHF_pol  | + |
| Cercocebus_atys_KQ010817.1 | 880184   | 880558   | HERVHF_env  | + |
| Cercocebus_atys_KQ010817.1 | 880725   | 881056   | HERVHF_3LTR | + |
| Cercocebus_atys_KQ010939.1 | 22340397 | 22340708 | HERVHF_5LTR | - |
| Cercocebus_atys_KQ010939.1 | 22341498 | 22343271 | HERVHF_pol  | - |
| Cercocebus_atys_KQ010939.1 | 22343375 | 22343695 | HERVHF_pro  | - |
| Cercocebus_atys_KQ010939.1 | 22345592 | 22345900 | HERVHF_3LTR | - |
| Cercocebus_atys_KQ011029.1 | 12402692 | 12403052 | HERVHF_5LTR | - |
| Cercocebus_atys_KQ011029.1 | 12403939 | 12405532 | HERVHF_pol  | - |
| Cercocebus_atys_KQ011029.1 | 12404990 | 12405739 | HERVHF_pro  | - |
| Cercocebus_atys_KQ011029.1 | 12407910 | 12408277 | HERVHF_3LTR | - |
| Cercocebus_atys_KQ011124.1 | 1915138  | 1915438  | HERVHF_5LTR | - |
| Cercocebus_atys_KQ011124.1 | 1916279  | 1917823  | HERVHF_pol  | - |
| Cercocebus_atys_KQ011124.1 | 1918329  | 1918706  | HERVHF_gag  | - |
| Cercocebus_atys_KQ011124.1 | 1920624  | 1920926  | HERVHF_3LTR | - |
| Cercocebus_atys_KQ011124.1 | 8891546  | 8891877  | HERVHF_5LTR | - |
| Cercocebus_atys_KQ011124.1 | 8893164  | 8893745  | HERVHF_pol  | - |
| Cercocebus_atys_KQ011124.1 | 8893355  | 8893957  | HERVHF_pro  | - |
| Cercocebus_atys_KQ011124.1 | 8894168  | 8894491  | HERVHF_gag  | - |
| Cercocebus_atys_KQ011124.1 | 8896235  | 8896550  | HERVHF_3LTR | - |
| Cercocebus_atys_KQ011181.1 | 2671711  | 2672018  | HERVHF_5LTR | - |
| Cercocebus_atys_KQ011181.1 | 2672193  | 2672613  | HERVHF_env  | - |
| Cercocebus_atys_KQ011181.1 | 2673038  | 2673806  | HERVHF_pol  | - |
| Cercocebus_atys_KQ011181.1 | 2674001  | 2674756  | HERVHF_pro  | - |
| Cercocebus_atys_KQ011181.1 | 2674902  | 2675261  | HERVHF_gag  | - |
| Cercocebus_atys_KQ011181.1 | 2676857  | 2677173  | HERVHF_3LTR | - |
| Cercocebus_atys_KQ011219.1 | 17637751 | 17638182 | HERVHF_5LTR | - |
| Cercocebus_atys_KQ011219.1 | 17639406 | 17641306 | HERVHF_pol  | - |
| Cercocebus_atys_KQ011219.1 | 17640668 | 17641453 | HERVHF_pro  | - |
| Cercocebus_atys_KQ011219.1 | 17643650 | 17644082 | HERVHF_3LTR | - |
| Cercocebus_atys_KQ011258.1 | 379972   | 380430   | HERVK_5LTR  | - |
| Cercocebus_atys_KQ011258.1 | 381965   | 383438   | HERVK_pol   | - |
| Cercocebus_atys_KQ011258.1 | 383348   | 384007   | HERVK_pro   | - |
| Cercocebus_atys_KQ011258.1 | 385745   | 386217   | HERVK_3LTR  | - |
| Cercocebus_atys_KQ011346.1 | 1808369  | 1808769  | HERVHF_5LTR | - |
| Cercocebus_atys_KQ011346.1 | 1809610  | 1811855  | HERVHF_pol  | - |
| Cercocebus_atys_KQ011346.1 | 1811217  | 1811948  | HERVHF_pro  | - |
| Cercocebus_atys_KQ011346.1 | 1812047  | 1812388  | HERVHF_gag  | - |
| Cercocebus_atys_KQ011346.1 | 1813963  | 1814354  | HERVHF_3LTR | - |
| Cercocebus_atys_KQ011503.1 | 8041399  | 8041846  | HERVHF_5LTR | - |
| Cercocebus_atys_KQ011503.1 | 8041993  | 8042346  | HERVHF_env  | - |
| Cercocebus_atys_KQ011503.1 | 8043423  | 8044978  | HERVHF_pol  | - |
| Cercocebus_atys_KQ011503.1 | 8045761  | 8047055  | HERVHF_gag  | - |
| Cercocebus_atys_KQ011503.1 | 8047766  | 8048218  | HERVHF_3LTR | - |



|                               |          |          |                |   |
|-------------------------------|----------|----------|----------------|---|
| Cercopithecus_atys_KQ011593.1 | 491621   | 492071   | HERVHF_5LTR    | + |
| Cercopithecus_atys_KQ011593.1 | 493766   | 494086   | HERVHF_gag     | + |
| Cercopithecus_atys_KQ011593.1 | 494267   | 495819   | HERVHF_pol     | + |
| Cercopithecus_atys_KQ011593.1 | 496880   | 497331   | HERVHF_3LTR    | + |
| Cercopithecus_atys_KQ011788.1 | 52420    | 52735    | HERVIPADP_5LTR | + |
| Cercopithecus_atys_KQ011788.1 | 54429    | 54923    | HERVIPADP_gag  | + |
| Cercopithecus_atys_KQ011788.1 | 55709    | 56464    | HERVIPADP_pol  | + |
| Cercopithecus_atys_KQ011788.1 | 57799    | 58587    | HERVIPADP_env  | + |
| Cercopithecus_atys_KQ011788.1 | 58764    | 59084    | HERVIPADP_3LTR | + |
| Cercopithecus_atys_KQ011789.1 | 858385   | 858805   | HERVHF_5LTR    | + |
| Cercopithecus_atys_KQ011789.1 | 860280   | 860588   | HERVHF_gag     | + |
| Cercopithecus_atys_KQ011789.1 | 860908   | 861543   | HERVHF_pol     | + |
| Cercopithecus_atys_KQ011789.1 | 868411   | 868835   | HERVHF_3LTR    | + |
| Cercopithecus_atys_KQ011854.1 | 551713   | 552091   | HERVHF_5LTR    | - |
| Cercopithecus_atys_KQ011854.1 | 552241   | 552597   | HERVHF_env     | - |
| Cercopithecus_atys_KQ011854.1 | 553926   | 555494   | HERVHF_pol     | - |
| Cercopithecus_atys_KQ011854.1 | 555708   | 556019   | HERVHF_gag     | - |
| Cercopithecus_atys_KQ011854.1 | 557372   | 557750   | HERVHF_3LTR    | - |
| Cercopithecus_atys_KQ011882.1 | 3324979  | 3325390  | HERVHF_5LTR    | + |
| Cercopithecus_atys_KQ011882.1 | 3326875  | 3327231  | HERVHF_gag     | + |
| Cercopithecus_atys_KQ011882.1 | 3327236  | 3328189  | HERVHF_pro     | + |
| Cercopithecus_atys_KQ011882.1 | 3327521  | 3330311  | HERVHF_pol     | + |
| Cercopithecus_atys_KQ011882.1 | 3330953  | 3331370  | HERVHF_3LTR    | + |
| Cercopithecus_atys_KQ012375.1 | 28905162 | 28905502 | HERVK_5LTR     | - |
| Cercopithecus_atys_KQ012375.1 | 28905736 | 28906064 | HERVK_env      | - |
| Cercopithecus_atys_KQ012375.1 | 28906748 | 28908504 | HERVK_pol      | - |
| Cercopithecus_atys_KQ012375.1 | 28908396 | 28909298 | HERVK_pro      | - |
| Cercopithecus_atys_KQ012375.1 | 28910246 | 28910598 | HERVK_3LTR     | - |
| Cercopithecus_atys_KQ012397.1 | 8911896  | 8912347  | HERVHF_5LTR    | - |
| Cercopithecus_atys_KQ012397.1 | 8912793  | 8915033  | HERVHF_pol     | - |
| Cercopithecus_atys_KQ012397.1 | 8914680  | 8915198  | HERVHF_pro     | - |
| Cercopithecus_atys_KQ012397.1 | 8918253  | 8918706  | HERVHF_3LTR    | - |
| Cercopithecus_atys_KQ012397.1 | 16731686 | 16732056 | HUERSP_5LTR    | - |
| Cercopithecus_atys_KQ012397.1 | 16732321 | 16735258 | HUERSP_env     | - |
| Cercopithecus_atys_KQ012397.1 | 16737081 | 16737715 | HUERSP_pol     | - |
| Cercopithecus_atys_KQ012397.1 | 16738413 | 16739045 | HUERSP_gag     | - |
| Cercopithecus_atys_KQ012397.1 | 16741061 | 16741426 | HUERSP_3LTR    | - |
| Cercopithecus_atys_KQ012408.1 | 13474040 | 13474470 | HERVHF_5LTR    | + |
| Cercopithecus_atys_KQ012408.1 | 13476677 | 13478824 | HERVHF_pol     | + |
| Cercopithecus_atys_KQ012408.1 | 13479649 | 13480080 | HERVHF_3LTR    | + |
| Cercopithecus_atys_KQ012419.1 | 1780545  | 1780940  | HERVHF_5LTR    | + |
| Cercopithecus_atys_KQ012419.1 | 1782546  | 1783124  | HERVHF_gag     | + |
| Cercopithecus_atys_KQ012419.1 | 1783306  | 1784097  | HERVHF_pro     | + |
| Cercopithecus_atys_KQ012419.1 | 1783617  | 1785833  | HERVHF_pol     | + |

|                               |          |          |             |   |
|-------------------------------|----------|----------|-------------|---|
| Cercopithecus_atys_KQ012419.1 | 1785930  | 1786283  | HERVHF_env  | + |
| Cercopithecus_atys_KQ012419.1 | 1786450  | 1786846  | HERVHF_3LTR | + |
| Cercopithecus_atys_KQ012430.1 | 6748237  | 6748668  | HERVHF_5LTR | - |
| Cercopithecus_atys_KQ012430.1 | 6749640  | 6751926  | HERVHF_pol  | - |
| Cercopithecus_atys_KQ012430.1 | 6752868  | 6754076  | HERVHF_gag  | - |
| Cercopithecus_atys_KQ012430.1 | 6755702  | 6756147  | HERVHF_3LTR | - |
| Cercopithecus_atys_KQ012453.1 | 14623272 | 14623660 | HERVHF_5LTR | - |
| Cercopithecus_atys_KQ012453.1 | 14623869 | 14624360 | HERVHF_env  | - |
| Cercopithecus_atys_KQ012453.1 | 14625906 | 14627159 | HERVHF_pol  | - |
| Cercopithecus_atys_KQ012453.1 | 14627293 | 14628109 | HERVHF_pro  | - |
| Cercopithecus_atys_KQ012453.1 | 14627852 | 14628337 | HERVHF_gag  | - |
| Cercopithecus_atys_KQ012453.1 | 14629569 | 14629956 | HERVHF_3LTR | - |
| Cercopithecus_atys_KQ012484.1 | 248694   | 249013   | HERVHF_5LTR | - |
| Cercopithecus_atys_KQ012484.1 | 250093   | 252634   | HERVHF_pol  | - |
| Cercopithecus_atys_KQ012484.1 | 253079   | 253657   | HERVHF_gag  | - |
| Cercopithecus_atys_KQ012484.1 | 254904   | 255236   | HERVHF_3LTR | - |
| Cercopithecus_atys_KQ012552.1 | 42753369 | 42753695 | HERVHF_5LTR | + |
| Cercopithecus_atys_KQ012552.1 | 42755589 | 42756401 | HERVHF_pro  | + |
| Cercopithecus_atys_KQ012552.1 | 42755826 | 42758252 | HERVHF_pol  | + |
| Cercopithecus_atys_KQ012552.1 | 42758867 | 42759194 | HERVHF_3LTR | + |
| Cercopithecus_atys_KQ012575.1 | 13739872 | 13740278 | HERVHF_5LTR | + |
| Cercopithecus_atys_KQ012575.1 | 13742534 | 13744221 | HERVHF_pol  | + |
| Cercopithecus_atys_KQ012575.1 | 13745055 | 13745450 | HERVHF_3LTR | + |
| Cercopithecus_atys_KQ012597.1 | 2481050  | 2481542  | HERVK_5LTR  | + |
| Cercopithecus_atys_KQ012597.1 | 2483072  | 2483938  | HERVK_pro   | + |
| Cercopithecus_atys_KQ012597.1 | 2483851  | 2485576  | HERVK_pol   | + |
| Cercopithecus_atys_KQ012597.1 | 2486116  | 2486430  | HERVK_env   | + |
| Cercopithecus_atys_KQ012597.1 | 2486528  | 2487041  | HERVK_3LTR  | + |
| Cercopithecus_atys_KQ012597.1 | 7381822  | 7382123  | HERVHF_5LTR | - |
| Cercopithecus_atys_KQ012597.1 | 7382131  | 7384534  | HERVHF_pol  | - |
| Cercopithecus_atys_KQ012597.1 | 7384575  | 7384904  | HERVHF_pro  | - |
| Cercopithecus_atys_KQ012597.1 | 7386868  | 7387177  | HERVHF_3LTR | - |
| Cercopithecus_atys_KQ012619.1 | 9201550  | 9202007  | HERVHF_5LTR | - |
| Cercopithecus_atys_KQ012619.1 | 9202935  | 9204537  | HERVHF_pol  | - |
| Cercopithecus_atys_KQ012619.1 | 9203893  | 9204765  | HERVHF_pro  | - |
| Cercopithecus_atys_KQ012619.1 | 9206621  | 9207076  | HERVHF_3LTR | - |
| Cercopithecus_atys_KQ012641.1 | 14684709 | 14685060 | HERVHF_5LTR | - |
| Cercopithecus_atys_KQ012641.1 | 14685666 | 14688219 | HERVHF_pol  | - |
| Cercopithecus_atys_KQ012641.1 | 14687833 | 14688534 | HERVHF_pro  | - |
| Cercopithecus_atys_KQ012641.1 | 14688717 | 14689316 | HERVHF_gag  | - |
| Cercopithecus_atys_KQ012641.1 | 14690840 | 14691189 | HERVHF_3LTR | - |
| Cercopithecus_atys_KQ012652.1 | 2177523  | 2178008  | HERVK_5LTR  | + |
| Cercopithecus_atys_KQ012652.1 | 2178913  | 2179452  | HERVK_gag   | + |
| Cercopithecus_atys_KQ012652.1 | 2179757  | 2180464  | HERVK_pro   | + |

|                                  |          |          |                |   |
|----------------------------------|----------|----------|----------------|---|
| Cercopithecus_atys_KQ012652.1    | 2180463  | 2181883  | HERVK_pol      | + |
| Cercopithecus_atys_KQ012652.1    | 2182300  | 2182731  | HERVK_env      | + |
| Cercopithecus_atys_KQ012652.1    | 2182828  | 2183301  | HERVK_3LTR     | + |
| Cercopithecus_atys_KQ012741.1    | 10253175 | 10253533 | HERVHF_5LTR    | + |
| Cercopithecus_atys_KQ012741.1    | 10255941 | 10258178 | HERVHF_pol     | + |
| Cercopithecus_atys_KQ012741.1    | 10258911 | 10259272 | HERVHF_3LTR    | + |
| Cercopithecus_atys_KQ012774.1    | 22835127 | 22835618 | HERVIPADP_5LTR | - |
| Cercopithecus_atys_KQ012774.1    | 22838224 | 22840888 | HERVIPADP_pol  | - |
| Cercopithecus_atys_KQ012774.1    | 22841314 | 22841670 | HERVIPADP_gag  | - |
| Cercopithecus_atys_KQ012774.1    | 22843446 | 22843939 | HERVIPADP_3LTR | - |
| Cercopithecus_atys_KQ012786.1    | 12672936 | 12673380 | HERVHF_5LTR    | + |
| Cercopithecus_atys_KQ012786.1    | 12675180 | 12675488 | HERVHF_gag     | + |
| Cercopithecus_atys_KQ012786.1    | 12675541 | 12675963 | HERVHF_pro     | + |
| Cercopithecus_atys_KQ012786.1    | 12675912 | 12677449 | HERVHF_pol     | + |
| Cercopithecus_atys_KQ012786.1    | 12678119 | 12678560 | HERVHF_3LTR    | + |
| Cercopithecus_atys_KQ012885.1    | 26400329 | 26400757 | HERVHF_5LTR    | - |
| Cercopithecus_atys_KQ012885.1    | 26401208 | 26403651 | HERVHF_pol     | - |
| Cercopithecus_atys_KQ012885.1    | 26403519 | 26403977 | HERVHF_pro     | - |
| Cercopithecus_atys_KQ012885.1    | 26405972 | 26406408 | HERVHF_3LTR    | - |
| Cercopithecus_atys_KQ012929.1    | 1266037  | 1266468  | HERVHF_5LTR    | - |
| Cercopithecus_atys_KQ012929.1    | 1267371  | 1269027  | HERVHF_pol     | - |
| Cercopithecus_atys_KQ012929.1    | 1268401  | 1269168  | HERVHF_pro     | - |
| Cercopithecus_atys_KQ012929.1    | 1271240  | 1271692  | HERVHF_3LTR    | - |
| Cercopithecus_atys_KQ012961.1    | 4255195  | 4255665  | HERVHF_5LTR    | + |
| Cercopithecus_atys_KQ012961.1    | 4257811  | 4258452  | HERVHF_pro     | + |
| Cercopithecus_atys_KQ012961.1    | 4257919  | 4259630  | HERVHF_pol     | + |
| Cercopithecus_atys_KQ012961.1    | 4260784  | 4261254  | HERVHF_3LTR    | + |
| Cercopithecus_atys_KQ012983.1    | 7733074  | 7733424  | HERVHF_5LTR    | + |
| Cercopithecus_atys_KQ012983.1    | 7735076  | 7735549  | HERVHF_gag     | + |
| Cercopithecus_atys_KQ012983.1    | 7735978  | 7738069  | HERVHF_pol     | + |
| Cercopithecus_atys_KQ012983.1    | 7739518  | 7740027  | HERVHF_env     | + |
| Cercopithecus_atys_KQ012983.1    | 7740255  | 7740617  | HERVHF_3LTR    | + |
| Cercopithecus_mitis_ctg124122119 | 24122573 |          | HERVK_5LTR     | - |
| Cercopithecus_mitis_ctg124123530 | 24125443 |          | HERVK_pol      | - |
| Cercopithecus_mitis_ctg124125508 | 24126221 |          | HERVK_pro      | - |
| Cercopithecus_mitis_ctg124127205 | 24127654 |          | HERVK_3LTR     | - |
| Cercopithecus_mitis_ctg102       | 8091606  | 8092063  | HERVHF_5LTR    | + |
| Cercopithecus_mitis_ctg102       | 8093529  | 8093882  | HERVHF_gag     | + |
| Cercopithecus_mitis_ctg102       | 8094493  | 8096975  | HERVHF_pol     | + |
| Cercopithecus_mitis_ctg102       | 8098744  | 8099462  | HERVHF_env     | + |
| Cercopithecus_mitis_ctg102       | 8099673  | 8100147  | HERVHF_3LTR    | + |
| Cercopithecus_mitis_ctg104       | 96059    | 96358    | HERVHF_5LTR    | + |
| Cercopithecus_mitis_ctg104       | 98043    | 98420    | HERVHF_gag     | + |
| Cercopithecus_mitis_ctg104       | 98536    | 99288    | HERVHF_pro     | + |

|                            |          |          |             |   |
|----------------------------|----------|----------|-------------|---|
| Cercopithecus_mitis_ctg104 | 98728    | 100188   | HERVHF_pol  | + |
| Cercopithecus_mitis_ctg104 | 100300   | 100818   | HERVHF_env  | + |
| Cercopithecus_mitis_ctg104 | 101250   | 101554   | HERVHF_3LTR | + |
| Cercopithecus_mitis_ctg111 | 6692497  | 6692872  | HERVHF_5LTR | - |
| Cercopithecus_mitis_ctg111 | 6694199  | 6696808  | HERVHF_pol  | - |
| Cercopithecus_mitis_ctg111 | 6696765  | 6697205  | HERVHF_pro  | - |
| Cercopithecus_mitis_ctg111 | 6697325  | 6697651  | HERVHF_gag  | - |
| Cercopithecus_mitis_ctg111 | 6699108  | 6699471  | HERVHF_3LTR | - |
| Cercopithecus_mitis_ctg112 | 5216784  | 5217147  | HERVHF_5LTR | - |
| Cercopithecus_mitis_ctg112 | 5217312  | 5217886  | HERVHF_env  | - |
| Cercopithecus_mitis_ctg112 | 5218588  | 5220686  | HERVHF_pol  | - |
| Cercopithecus_mitis_ctg112 | 5220410  | 5220871  | HERVHF_pro  | - |
| Cercopithecus_mitis_ctg112 | 5220912  | 5221220  | HERVHF_gag  | - |
| Cercopithecus_mitis_ctg112 | 5222700  | 5223060  | HERVHF_3LTR | - |
| Cercopithecus_mitis_ctg114 | 26663217 | 26663528 | HERVHF_5LTR | + |
| Cercopithecus_mitis_ctg114 | 26666278 | 26666640 | HERVHF_gag  | + |
| Cercopithecus_mitis_ctg114 | 26667342 | 26668010 | HERVHF_pro  | + |
| Cercopithecus_mitis_ctg114 | 26667447 | 26669341 | HERVHF_pol  | + |
| Cercopithecus_mitis_ctg114 | 26675797 | 26676118 | HERVHF_3LTR | + |
| Cercopithecus_mitis_ctg125 | 8302176  | 8302602  | HERVHF_5LTR | - |
| Cercopithecus_mitis_ctg125 | 8302790  | 8304211  | HERVHF_pol  | - |
| Cercopithecus_mitis_ctg125 | 8304005  | 8304710  | HERVHF_pro  | - |
| Cercopithecus_mitis_ctg125 | 8304943  | 8305369  | HERVHF_3LTR | - |
| Cercopithecus_mitis_ctg129 | 8726531  | 8726940  | HERVHF_5LTR | - |
| Cercopithecus_mitis_ctg129 | 8727528  | 8730066  | HERVHF_pol  | - |
| Cercopithecus_mitis_ctg129 | 8729410  | 8730252  | HERVHF_pro  | - |
| Cercopithecus_mitis_ctg129 | 8730282  | 8730644  | HERVHF_gag  | - |
| Cercopithecus_mitis_ctg129 | 8732173  | 8732586  | HERVHF_3LTR | - |
| Cercopithecus_mitis_ctg13  | 8839949  | 8840357  | HERVHF_5LTR | - |
| Cercopithecus_mitis_ctg13  | 8840958  | 8842920  | HERVHF_pol  | - |
| Cercopithecus_mitis_ctg13  | 8842674  | 8843387  | HERVHF_pro  | - |
| Cercopithecus_mitis_ctg13  | 8843421  | 8843864  | HERVHF_gag  | - |
| Cercopithecus_mitis_ctg13  | 8845236  | 8845633  | HERVHF_3LTR | - |
| Cercopithecus_mitis_ctg132 | 9457461  | 9457790  | HERVHF_5LTR | + |
| Cercopithecus_mitis_ctg132 | 9459942  | 9460316  | HERVHF_pro  | + |
| Cercopithecus_mitis_ctg132 | 9460221  | 9462539  | HERVHF_pol  | + |
| Cercopithecus_mitis_ctg132 | 9462924  | 9463310  | HERVHF_env  | + |
| Cercopithecus_mitis_ctg132 | 9463395  | 9463739  | HERVHF_3LTR | + |
| Cercopithecus_mitis_ctg156 | 1280365  | 1280817  | HERVHF_5LTR | + |
| Cercopithecus_mitis_ctg156 | 1282505  | 1282810  | HERVHF_gag  | + |
| Cercopithecus_mitis_ctg156 | 1282893  | 1283615  | HERVHF_pro  | + |
| Cercopithecus_mitis_ctg156 | 1283061  | 1285133  | HERVHF_pol  | + |
| Cercopithecus_mitis_ctg156 | 1285569  | 1286025  | HERVHF_3LTR | + |
| Cercopithecus_mitis_ctg158 | 3705244  | 3705626  | HERVHF_5LTR | - |

|                                  |          |          |             |   |
|----------------------------------|----------|----------|-------------|---|
| Cercopithecus_mitis_ctg158       | 3705809  | 3706530  | HERVHF_env  | - |
| Cercopithecus_mitis_ctg158       | 3712322  | 3714636  | HERVHF_pol  | - |
| Cercopithecus_mitis_ctg158       | 3714695  | 3715141  | HERVHF_pro  | - |
| Cercopithecus_mitis_ctg158       | 3717321  | 3717708  | HERVHF_3LTR | - |
| Cercopithecus_mitis_ctg16        | 44551454 | 44551904 | HERVHF_5LTR | - |
| Cercopithecus_mitis_ctg16        | 44552757 | 44554398 | HERVHF_pol  | - |
| Cercopithecus_mitis_ctg16        | 44554696 | 44555037 | HERVHF_gag  | - |
| Cercopithecus_mitis_ctg16        | 44556704 | 44557154 | HERVHF_3LTR | - |
| Cercopithecus_mitis_ctg161       | 2806018  | 2806389  | HERVHF_5LTR | + |
| Cercopithecus_mitis_ctg161       | 2807025  | 2807744  | HERVHF_pro  | + |
| Cercopithecus_mitis_ctg161       | 2807268  | 2808898  | HERVHF_pol  | + |
| Cercopithecus_mitis_ctg161       | 2810558  | 2810921  | HERVHF_3LTR | + |
| Cercopithecus_mitis_ctg165       | 6190827  | 6191260  | HERVHF_5LTR | + |
| Cercopithecus_mitis_ctg165       | 6192164  | 6193062  | HERVHF_gag  | + |
| Cercopithecus_mitis_ctg165       | 6193428  | 6195818  | HERVHF_pol  | + |
| Cercopithecus_mitis_ctg165       | 6196363  | 6196798  | HERVHF_3LTR | + |
| Cercopithecus_mitis_ctg184       | 1332441  | 1332837  | HERVHF_5LTR | + |
| Cercopithecus_mitis_ctg184       | 1334671  | 1335687  | HERVHF_pro  | + |
| Cercopithecus_mitis_ctg184       | 1335007  | 1337303  | HERVHF_pol  | + |
| Cercopithecus_mitis_ctg184       | 1337671  | 1338068  | HERVHF_3LTR | + |
| Cercopithecus_mitis_ctg194       | 3317430  | 3317870  | HERVHF_5LTR | + |
| Cercopithecus_mitis_ctg194       | 3320257  | 3321741  | HERVHF_pol  | + |
| Cercopithecus_mitis_ctg194       | 3322422  | 3322876  | HERVHF_3LTR | + |
| Cercopithecus_mitis_ctg197       | 2316921  | 2317289  | HERVHF_5LTR | + |
| Cercopithecus_mitis_ctg197       | 2320063  | 2320518  | HERVHF_gag  | + |
| Cercopithecus_mitis_ctg197       | 2320537  | 2321010  | HERVHF_pro  | + |
| Cercopithecus_mitis_ctg197       | 2321057  | 2322599  | HERVHF_pol  | + |
| Cercopithecus_mitis_ctg197       | 2323067  | 2323439  | HERVHF_3LTR | + |
| Cercopithecus_mitis_ctg219933394 | 19933842 |          | HERVHF_5LTR | - |
| Cercopithecus_mitis_ctg219935154 | 19936737 |          | HERVHF_pol  | - |
| Cercopithecus_mitis_ctg219936195 | 19936980 |          | HERVHF_pro  | - |
| Cercopithecus_mitis_ctg219938987 | 19939440 |          | HERVHF_3LTR | - |
| Cercopithecus_mitis_ctg21        | 964768   | 965285   | HERVK_5LTR  | + |
| Cercopithecus_mitis_ctg21        | 965662   | 966646   | HERVK_gag   | + |
| Cercopithecus_mitis_ctg21        | 966709   | 967591   | HERVK_pro   | + |
| Cercopithecus_mitis_ctg21        | 967450   | 968716   | HERVK_pol   | + |
| Cercopithecus_mitis_ctg21        | 969208   | 969519   | HERVK_env   | + |
| Cercopithecus_mitis_ctg21        | 969596   | 970110   | HERVK_3LTR  | + |
| Cercopithecus_mitis_ctg247       | 1454353  | 1454746  | HERVHF_5LTR | - |
| Cercopithecus_mitis_ctg247       | 1455434  | 1457600  | HERVHF_pol  | - |
| Cercopithecus_mitis_ctg247       | 1457196  | 1457924  | HERVHF_pro  | - |
| Cercopithecus_mitis_ctg247       | 1458023  | 1458364  | HERVHF_gag  | - |
| Cercopithecus_mitis_ctg247       | 1459939  | 1460330  | HERVHF_3LTR | - |
| Cercopithecus_mitis_ctg26        | 15585634 | 15586066 | HERVHF_5LTR | + |

|                            |          |          |             |   |
|----------------------------|----------|----------|-------------|---|
| Cercopithecus_mitis_ctg26  | 15587895 | 15588326 | HERVHF_pro  | + |
| Cercopithecus_mitis_ctg26  | 15588229 | 15590400 | HERVHF_pol  | + |
| Cercopithecus_mitis_ctg26  | 15590720 | 15591040 | HERVHF_env  | + |
| Cercopithecus_mitis_ctg26  | 15591202 | 15591640 | HERVHF_3LTR | + |
| Cercopithecus_mitis_ctg26  | 37440988 | 37441311 | HERVHF_5LTR | - |
| Cercopithecus_mitis_ctg26  | 37441882 | 37443612 | HERVHF_pol  | - |
| Cercopithecus_mitis_ctg26  | 37446450 | 37446781 | HERVHF_3LTR | - |
| Cercopithecus_mitis_ctg282 | 163058   | 163498   | HERVHF_5LTR | - |
| Cercopithecus_mitis_ctg282 | 164587   | 166460   | HERVHF_pol  | - |
| Cercopithecus_mitis_ctg282 | 166787   | 167086   | HERVHF_gag  | - |
| Cercopithecus_mitis_ctg282 | 168665   | 169097   | HERVHF_3LTR | - |
| Cercopithecus_mitis_ctg29  | 7170370  | 7170817  | HERVHF_5LTR | + |
| Cercopithecus_mitis_ctg29  | 7172503  | 7172856  | HERVHF_gag  | + |
| Cercopithecus_mitis_ctg29  | 7172846  | 7173673  | HERVHF_pro  | + |
| Cercopithecus_mitis_ctg29  | 7173134  | 7174766  | HERVHF_pol  | + |
| Cercopithecus_mitis_ctg29  | 7175635  | 7176068  | HERVHF_3LTR | + |
| Cercopithecus_mitis_ctg30  | 16391519 | 16391931 | HERVHF_5LTR | - |
| Cercopithecus_mitis_ctg30  | 16392651 | 16395374 | HERVHF_pol  | - |
| Cercopithecus_mitis_ctg30  | 16394736 | 16395440 | HERVHF_pro  | - |
| Cercopithecus_mitis_ctg30  | 16397653 | 16398065 | HERVHF_3LTR | - |
| Cercopithecus_mitis_ctg393 | 404262   | 404594   | HERVHF_5LTR | + |
| Cercopithecus_mitis_ctg393 | 405840   | 406418   | HERVHF_gag  | + |
| Cercopithecus_mitis_ctg393 | 406606   | 407436   | HERVHF_pro  | + |
| Cercopithecus_mitis_ctg393 | 406624   | 410167   | HERVHF_pol  | + |
| Cercopithecus_mitis_ctg393 | 410482   | 410803   | HERVHF_3LTR | + |
| Cercopithecus_mitis_ctg42  | 10341181 | 10341533 | HERVHF_5LTR | - |
| Cercopithecus_mitis_ctg42  | 10342257 | 10343967 | HERVHF_pol  | - |
| Cercopithecus_mitis_ctg42  | 10343925 | 10344359 | HERVHF_pro  | - |
| Cercopithecus_mitis_ctg42  | 10344440 | 10344873 | HERVHF_gag  | - |
| Cercopithecus_mitis_ctg42  | 10346383 | 10346731 | HERVHF_3LTR | - |
| Cercopithecus_mitis_ctg43  | 11649635 | 11649984 | HERVK_5LTR  | + |
| Cercopithecus_mitis_ctg43  | 11650496 | 11651447 | HERVK_gag   | + |
| Cercopithecus_mitis_ctg43  | 11651707 | 11652270 | HERVK_pro   | + |
| Cercopithecus_mitis_ctg43  | 11652189 | 11654085 | HERVK_pol   | + |
| Cercopithecus_mitis_ctg43  | 11655062 | 11655430 | HERVK_3LTR  | + |
| Cercopithecus_mitis_ctg44  | 29614624 | 29614950 | HERVHF_5LTR | - |
| Cercopithecus_mitis_ctg44  | 29615240 | 29615581 | HERVHF_env  | - |
| Cercopithecus_mitis_ctg44  | 29615878 | 29616582 | HERVHF_pol  | - |
| Cercopithecus_mitis_ctg44  | 29616896 | 29617306 | HERVHF_gag  | - |
| Cercopithecus_mitis_ctg44  | 29618888 | 29619206 | HERVHF_3LTR | - |
| Cercopithecus_mitis_ctg47  | 1733475  | 1733791  | HERVHF_5LTR | + |
| Cercopithecus_mitis_ctg47  | 1735327  | 1735779  | HERVHF_gag  | + |
| Cercopithecus_mitis_ctg47  | 1735897  | 1736742  | HERVHF_pro  | + |
| Cercopithecus_mitis_ctg47  | 1736362  | 1738505  | HERVHF_pol  | + |

|                                  |          |          |               |   |
|----------------------------------|----------|----------|---------------|---|
| Cercopithecus_mitis_ctg47        | 1739369  | 1739700  | HERVHF_3LTR   | + |
| Cercopithecus_mitis_ctg49        | 6281887  | 6282336  | HERVHF_5LTR   | + |
| Cercopithecus_mitis_ctg49        | 6283906  | 6284259  | HERVHF_gag    | + |
| Cercopithecus_mitis_ctg49        | 6284428  | 6285177  | HERVHF_pro    | + |
| Cercopithecus_mitis_ctg49        | 6284533  | 6286075  | HERVHF_pol    | + |
| Cercopithecus_mitis_ctg49        | 6286890  | 6287337  | HERVHF_3LTR   | + |
| Cercopithecus_mitis_ctg511880088 | 11880395 |          | HERVHF_5LTR   | + |
| Cercopithecus_mitis_ctg511881837 | 11882289 |          | HERVHF_gag    | + |
| Cercopithecus_mitis_ctg511882347 | 11883123 |          | HERVHF_pro    | + |
| Cercopithecus_mitis_ctg511882509 | 11883411 |          | HERVHF_pol    | + |
| Cercopithecus_mitis_ctg511885268 | 11885579 |          | HERVHF_3LTR   | + |
| Cercopithecus_mitis_ctg55        | 186473   | 186833   | HERVHF_5LTR   | - |
| Cercopithecus_mitis_ctg55        | 187061   | 187381   | HERVHF_env    | - |
| Cercopithecus_mitis_ctg55        | 187318   | 188368   | HERVHF_pol    | - |
| Cercopithecus_mitis_ctg55        | 188265   | 189131   | HERVHF_pro    | - |
| Cercopithecus_mitis_ctg55        | 189284   | 190126   | HERVHF_gag    | - |
| Cercopithecus_mitis_ctg55        | 190866   | 191233   | HERVHF_3LTR   | - |
| Cercopithecus_mitis_ctg58        | 9304446  | 9304905  | HERVHF_5LTR   | + |
| Cercopithecus_mitis_ctg58        | 9307258  | 9307956  | HERVHF_pro    | + |
| Cercopithecus_mitis_ctg58        | 9307288  | 9309215  | HERVHF_pol    | + |
| Cercopithecus_mitis_ctg58        | 9309714  | 9310181  | HERVHF_3LTR   | + |
| Cercopithecus_mitis_ctg62        | 8248149  | 8248508  | HERVHF_5LTR   | - |
| Cercopithecus_mitis_ctg62        | 8249049  | 8250964  | HERVHF_pol    | - |
| Cercopithecus_mitis_ctg62        | 8250608  | 8251129  | HERVHF_pro    | - |
| Cercopithecus_mitis_ctg62        | 8251438  | 8251995  | HERVHF_gag    | - |
| Cercopithecus_mitis_ctg62        | 8253408  | 8253751  | HERVHF_3LTR   | - |
| Cercopithecus_mitis_ctg63        | 11506896 | 11507340 | HERVK_5LTR    | + |
| Cercopithecus_mitis_ctg63        | 11508972 | 11509592 | HERVK_pro     | + |
| Cercopithecus_mitis_ctg63        | 11509454 | 11511247 | HERVK_pol     | + |
| Cercopithecus_mitis_ctg63        | 11511922 | 11512641 | HERVK_env     | + |
| Cercopithecus_mitis_ctg63        | 11512733 | 11513162 | HERVK_3LTR    | + |
| Cercopithecus_mitis_ctg63        | 18295973 | 18296291 | HSERVIII_5LTR | - |
| Cercopithecus_mitis_ctg63        | 18300864 | 18303349 | HSERVIII_pol  | - |
| Cercopithecus_mitis_ctg63        | 18309129 | 18309458 | HSERVIII_3LTR | - |
| Cercopithecus_mitis_ctg78155376  | 8155887  |          | HERVK_5LTR    | + |
| Cercopithecus_mitis_ctg78156758  | 8157570  |          | HERVK_pro     | + |
| Cercopithecus_mitis_ctg78157465  | 8158793  |          | HERVK_pol     | + |
| Cercopithecus_mitis_ctg78159691  | 8160212  |          | HERVK_env     | + |
| Cercopithecus_mitis_ctg78160284  | 8160805  |          | HERVK_3LTR    | + |
| Cercopithecus_mitis_ctg713695227 | 13695617 |          | HERVHF_5LTR   | + |
| Cercopithecus_mitis_ctg713697309 | 13697641 |          | HERVHF_gag    | + |
| Cercopithecus_mitis_ctg713697910 | 13698518 |          | HERVHF_pro    | + |
| Cercopithecus_mitis_ctg713698195 | 13698785 |          | HERVHF_pol    | + |
| Cercopithecus_mitis_ctg713700404 | 13700779 |          | HERVHF_3LTR   | + |

|                                    |          |          |             |   |
|------------------------------------|----------|----------|-------------|---|
| Cercopithecus_mitis_ctg73          | 1939556  | 1939871  | HERVHF_5LTR | - |
| Cercopithecus_mitis_ctg73          | 1940630  | 1942603  | HERVHF_pol  | - |
| Cercopithecus_mitis_ctg73          | 1942097  | 1942795  | HERVHF_pro  | - |
| Cercopithecus_mitis_ctg73          | 1942854  | 1943294  | HERVHF_gag  | - |
| Cercopithecus_mitis_ctg73          | 1945134  | 1945447  | HERVHF_3LTR | - |
| Cercopithecus_mitis_ctg76          | 8461018  | 8461346  | HERVK_5LTR  | + |
| Cercopithecus_mitis_ctg76          | 8461766  | 8462317  | HERVK_gag   | + |
| Cercopithecus_mitis_ctg76          | 8463535  | 8464820  | HERVK_pro   | + |
| Cercopithecus_mitis_ctg76          | 8465996  | 8468012  | HERVK_pol   | + |
| Cercopithecus_mitis_ctg76          | 8468556  | 8468861  | HERVK_env   | + |
| Cercopithecus_mitis_ctg76          | 8469441  | 8469776  | HERVK_3LTR  | + |
| Cercopithecus_mitis_ctg94561251    | 4561654  |          | HERVHF_5LTR | - |
| Cercopithecus_mitis_ctg94562439    | 4564007  |          | HERVHF_pol  | - |
| Cercopithecus_mitis_ctg94566396    | 4566794  |          | HERVHF_3LTR | - |
| Cercopithecus_mitis_ctg90          | 2091941  | 2092298  | HERVHF_5LTR | - |
| Cercopithecus_mitis_ctg90          | 2092886  | 2095095  | HERVHF_pol  | - |
| Cercopithecus_mitis_ctg90          | 2095565  | 2095921  | HERVHF_gag  | - |
| Cercopithecus_mitis_ctg90          | 2097364  | 2097724  | HERVHF_3LTR | - |
| Cercopithecus_mitis_ctg91          | 8884233  | 8884634  | HERVHF_5LTR | + |
| Cercopithecus_mitis_ctg91          | 8885369  | 8886690  | HERVHF_gag  | + |
| Cercopithecus_mitis_ctg91          | 8886739  | 8887329  | HERVHF_pro  | + |
| Cercopithecus_mitis_ctg91          | 8887159  | 8889857  | HERVHF_pol  | + |
| Cercopithecus_mitis_ctg91          | 8891253  | 8891638  | HERVHF_3LTR | + |
| Cercopithecus_mitis_ctg94          | 1825288  | 1825742  | HERVHF_5LTR | + |
| Cercopithecus_mitis_ctg94          | 1827249  | 1828532  | HERVHF_pol  | + |
| Cercopithecus_mitis_ctg94          | 1828719  | 1829172  | HERVHF_3LTR | + |
| Cercopithecus_mona.fasta_Contig1   | 63229211 | 63229571 | HERVHF_5LTR | - |
| Cercopithecus_mona.fasta_Contig1   | 63230016 | 63231647 | HERVHF_pol  | - |
| Cercopithecus_mona.fasta_Contig1   | 63231286 | 63232110 | HERVHF_pro  | - |
| Cercopithecus_mona.fasta_Contig1   | 63234222 | 63234597 | HERVHF_3LTR | - |
| Cercopithecus_mona.fasta_Contig1   | 71286507 | 71286826 | HERVHF_5LTR | - |
| Cercopithecus_mona.fasta_Contig1   | 71287602 | 71289318 | HERVHF_pol  | - |
| Cercopithecus_mona.fasta_Contig1   | 71291742 | 71292056 | HERVHF_3LTR | - |
| Cercopithecus_mona.fasta_Contig107 | 3200774  | 3201269  | HERVK_5LTR  | - |
| Cercopithecus_mona.fasta_Contig107 | 3202024  | 3203956  | HERVK_pol   | - |
| Cercopithecus_mona.fasta_Contig107 | 3203851  | 3204792  | HERVK_pro   | - |
| Cercopithecus_mona.fasta_Contig107 | 3204668  | 3206117  | HERVK_gag   | - |
| Cercopithecus_mona.fasta_Contig107 | 3206579  | 3207052  | HERVK_3LTR  | - |
| Cercopithecus_mona.fasta_Contig12  | 79341    | 79640    | HERVHF_5LTR | + |
| Cercopithecus_mona.fasta_Contig12  | 81325    | 81762    | HERVHF_gag  | + |
| Cercopithecus_mona.fasta_Contig12  | 81845    | 82591    | HERVHF_pro  | + |
| Cercopithecus_mona.fasta_Contig12  | 82010    | 83605    | HERVHF_pol  | + |
| Cercopithecus_mona.fasta_Contig12  | 83606    | 84100    | HERVHF_env  | + |
| Cercopithecus_mona.fasta_Contig12  | 84532    | 84836    | HERVHF_3LTR | + |



|                                    |          |          |             |   |
|------------------------------------|----------|----------|-------------|---|
| Cercopithecus_mona.fasta_Contig12  | 8348008  | 8348461  | HERVHF_5LTR | - |
| Cercopithecus_mona.fasta_Contig12  | 8348910  | 8351184  | HERVHF_pol  | - |
| Cercopithecus_mona.fasta_Contig12  | 8350753  | 8351328  | HERVHF_pro  | - |
| Cercopithecus_mona.fasta_Contig12  | 8353630  | 8354082  | HERVHF_3LTR | - |
| Cercopithecus_mona.fasta_Contig12  | 45163377 | 45163732 | HERVHF_5LTR | + |
| Cercopithecus_mona.fasta_Contig12  | 45165096 | 45165623 | HERVHF_gag  | + |
| Cercopithecus_mona.fasta_Contig12  | 45165747 | 45167774 | HERVHF_pol  | + |
| Cercopithecus_mona.fasta_Contig12  | 45168700 | 45169042 | HERVHF_3LTR | + |
| Cercopithecus_mona.fasta_Contig13  | 35739844 | 35740242 | HERVHF_5LTR | + |
| Cercopithecus_mona.fasta_Contig13  | 35742421 | 35744322 | HERVHF_pol  | + |
| Cercopithecus_mona.fasta_Contig13  | 35744989 | 35745392 | HERVHF_3LTR | + |
| Cercopithecus_mona.fasta_Contig14  | 7740641  | 7741158  | HERVK_5LTR  | - |
| Cercopithecus_mona.fasta_Contig14  | 7741232  | 7741564  | HERVK_env   | - |
| Cercopithecus_mona.fasta_Contig14  | 7742757  | 7744016  | HERVK_pol   | - |
| Cercopithecus_mona.fasta_Contig14  | 7743884  | 7744823  | HERVK_pro   | - |
| Cercopithecus_mona.fasta_Contig14  | 7745574  | 7746080  | HERVK_3LTR  | - |
| Cercopithecus_mona.fasta_Contig14  | 17200144 | 17200661 | HERVK_5LTR  | + |
| Cercopithecus_mona.fasta_Contig14  | 17202199 | 17202966 | HERVK_pro   | + |
| Cercopithecus_mona.fasta_Contig14  | 17202861 | 17204127 | HERVK_pol   | + |
| Cercopithecus_mona.fasta_Contig14  | 17204619 | 17204930 | HERVK_env   | + |
| Cercopithecus_mona.fasta_Contig14  | 17205007 | 17205521 | HERVK_3LTR  | + |
| Cercopithecus_mona.fasta_Contig18  | 9483412  | 9483738  | HERVHF_5LTR | - |
| Cercopithecus_mona.fasta_Contig18  | 9484026  | 9484364  | HERVHF_env  | - |
| Cercopithecus_mona.fasta_Contig18  | 9484672  | 9485430  | HERVHF_pol  | - |
| Cercopithecus_mona.fasta_Contig18  | 9485690  | 9486100  | HERVHF_gag  | - |
| Cercopithecus_mona.fasta_Contig18  | 9487655  | 9487973  | HERVHF_3LTR | - |
| Cercopithecus_mona.fasta_Contig18  | 29499307 | 29499666 | HERVHF_5LTR | - |
| Cercopithecus_mona.fasta_Contig18  | 29500606 | 29502118 | HERVHF_pol  | - |
| Cercopithecus_mona.fasta_Contig18  | 29501762 | 29502283 | HERVHF_pro  | - |
| Cercopithecus_mona.fasta_Contig18  | 29502592 | 29502897 | HERVHF_gag  | - |
| Cercopithecus_mona.fasta_Contig18  | 29504534 | 29504874 | HERVHF_3LTR | - |
| Cercopithecus_mona.fasta_Contig185 | 1113487  | 1113919  | HERVHF_5LTR | + |
| Cercopithecus_mona.fasta_Contig185 | 1116094  | 1116609  | HERVHF_pro  | + |
| Cercopithecus_mona.fasta_Contig185 | 1116202  | 1118273  | HERVHF_pol  | + |
| Cercopithecus_mona.fasta_Contig185 | 1118884  | 1119240  | HERVHF_env  | + |
| Cercopithecus_mona.fasta_Contig185 | 1119395  | 1119835  | HERVHF_3LTR | + |
| Cercopithecus_mona.fasta_Contig19  | 1004738  | 1005190  | HERVHF_5LTR | + |
| Cercopithecus_mona.fasta_Contig19  | 1007242  | 1008024  | HERVHF_pro  | + |
| Cercopithecus_mona.fasta_Contig19  | 1007452  | 1009072  | HERVHF_pol  | + |
| Cercopithecus_mona.fasta_Contig19  | 1010071  | 1010527  | HERVHF_3LTR | + |
| Cercopithecus_mona.fasta_Contig23  | 29600574 | 29600974 | HERVHF_5LTR | - |
| Cercopithecus_mona.fasta_Contig23  | 29601564 | 29603986 | HERVHF_pol  | - |
| Cercopithecus_mona.fasta_Contig23  | 29603444 | 29604286 | HERVHF_pro  | - |
| Cercopithecus_mona.fasta_Contig23  | 29606112 | 29606504 | HERVHF_3LTR | - |

|                                    |          |          |                |   |
|------------------------------------|----------|----------|----------------|---|
| Cercopithecus_mona.fasta_Contig24  | 19922673 | 19923178 | HERVIPADP_5LTR | + |
| Cercopithecus_mona.fasta_Contig24  | 19924751 | 19925101 | HERVIPADP_gag  | + |
| Cercopithecus_mona.fasta_Contig24  | 19925716 | 19928523 | HERVIPADP_pol  | + |
| Cercopithecus_mona.fasta_Contig24  | 19930377 | 19930805 | HERVIPADP_env  | + |
| Cercopithecus_mona.fasta_Contig24  | 19930981 | 19931486 | HERVIPADP_3LTR | + |
| Cercopithecus_mona.fasta_Contig26  | 23225035 | 23225374 | HERVK_5LTR     | + |
| Cercopithecus_mona.fasta_Contig26  | 23226455 | 23227090 | HERVK_gag      | + |
| Cercopithecus_mona.fasta_Contig26  | 23226958 | 23227837 | HERVK_pro      | + |
| Cercopithecus_mona.fasta_Contig26  | 23227818 | 23228537 | HERVK_pol      | + |
| Cercopithecus_mona.fasta_Contig26  | 23229555 | 23229901 | HERVK_3LTR     | + |
| Cercopithecus_mona.fasta_Contig28  | 3795864  | 3796532  | HERVHF_5LTR    | - |
| Cercopithecus_mona.fasta_Contig28  | 3796596  | 3798721  | HERVHF_pol     | - |
| Cercopithecus_mona.fasta_Contig28  | 3798481  | 3799482  | HERVHF_pro     | - |
| Cercopithecus_mona.fasta_Contig28  | 3801741  | 3802405  | HERVHF_3LTR    | - |
| Cercopithecus_mona.fasta_Contig28  | 6945127  | 6945906  | HUERSP_5LTR    | + |
| Cercopithecus_mona.fasta_Contig28  | 6947801  | 6948268  | HUERSP_gag     | + |
| Cercopithecus_mona.fasta_Contig28  | 6948433  | 6949083  | HUERSP_pro     | + |
| Cercopithecus_mona.fasta_Contig28  | 6948610  | 6949236  | HUERSP_pol     | + |
| Cercopithecus_mona.fasta_Contig28  | 6950009  | 6951727  | HUERSP_env     | + |
| Cercopithecus_mona.fasta_Contig28  | 6955204  | 6955974  | HUERSP_3LTR    | + |
| Cercopithecus_mona.fasta_Contig3   | 58173002 | 58173462 | HERVHF_5LTR    | + |
| Cercopithecus_mona.fasta_Contig3   | 58174579 | 58175007 | HERVHF_gag     | + |
| Cercopithecus_mona.fasta_Contig3   | 58176328 | 58177227 | HERVHF_pol     | + |
| Cercopithecus_mona.fasta_Contig3   | 58180274 | 58180870 | HERVHF_env     | + |
| Cercopithecus_mona.fasta_Contig3   | 58181031 | 58181493 | HERVHF_3LTR    | + |
| Cercopithecus_mona.fasta_Contig304 | 233274   | 233666   | HERVK_5LTR     | + |
| Cercopithecus_mona.fasta_Contig304 | 235172   | 236113   | HERVK_pro      | + |
| Cercopithecus_mona.fasta_Contig304 | 236008   | 238246   | HERVK_pol      | + |
| Cercopithecus_mona.fasta_Contig304 | 239635   | 240043   | HERVK_3LTR     | + |
| Cercopithecus_mona.fasta_Contig36  | 10555555 | 10555879 | HERVK_5LTR     | - |
| Cercopithecus_mona.fasta_Contig36  | 10556019 | 10556933 | HERVK_env      | - |
| Cercopithecus_mona.fasta_Contig36  | 10557272 | 10559137 | HERVK_pol      | - |
| Cercopithecus_mona.fasta_Contig36  | 10559035 | 10559811 | HERVK_pro      | - |
| Cercopithecus_mona.fasta_Contig36  | 10561390 | 10561718 | HERVK_3LTR     | - |
| Cercopithecus_mona.fasta_Contig37  | 4677372  | 4677779  | HERVHF_5LTR    | + |
| Cercopithecus_mona.fasta_Contig37  | 4679192  | 4679548  | HERVHF_gag     | + |
| Cercopithecus_mona.fasta_Contig37  | 4681398  | 4682198  | HERVHF_pro     | + |
| Cercopithecus_mona.fasta_Contig37  | 4681635  | 4684055  | HERVHF_pol     | + |
| Cercopithecus_mona.fasta_Contig37  | 4684227  | 4684574  | HERVHF_env     | + |
| Cercopithecus_mona.fasta_Contig37  | 4687787  | 4688187  | HERVHF_3LTR    | + |
| Cercopithecus_mona.fasta_Contig4   | 22294757 | 22295210 | HERVHF_5LTR    | - |
| Cercopithecus_mona.fasta_Contig4   | 22295374 | 22296692 | HERVHF_pol     | - |
| Cercopithecus_mona.fasta_Contig4   | 22298197 | 22298652 | HERVHF_3LTR    | - |
| Cercopithecus_mona.fasta_Contig42  | 13013620 | 13014074 | HERVHF_5LTR    | + |

|                                    |          |          |             |   |
|------------------------------------|----------|----------|-------------|---|
| Cercopithecus_mona.fasta_Contig42  | 13015554 | 13016159 | HERVHF_gag  | + |
| Cercopithecus_mona.fasta_Contig42  | 13016410 | 13018756 | HERVHF_pol  | + |
| Cercopithecus_mona.fasta_Contig42  | 13019626 | 13020079 | HERVHF_3LTR | + |
| Cercopithecus_mona.fasta_Contig47  | 486885   | 487335   | HERVHF_5LTR | + |
| Cercopithecus_mona.fasta_Contig47  | 489008   | 489349   | HERVHF_gag  | + |
| Cercopithecus_mona.fasta_Contig47  | 489587   | 490363   | HERVHF_pro  | + |
| Cercopithecus_mona.fasta_Contig47  | 489659   | 491081   | HERVHF_pol  | + |
| Cercopithecus_mona.fasta_Contig47  | 492138   | 492589   | HERVHF_3LTR | + |
| Cercopithecus_mona.fasta_Contig49  | 164199   | 165028   | HERVK_5LTR  | + |
| Cercopithecus_mona.fasta_Contig49  | 166493   | 167047   | HERVK_pro   | + |
| Cercopithecus_mona.fasta_Contig49  | 167234   | 168513   | HERVK_pol   | + |
| Cercopithecus_mona.fasta_Contig49  | 169703   | 170542   | HERVK_3LTR  | + |
| Cercopithecus_mona.fasta_Contig50  | 7165085  | 7165392  | HERVHF_5LTR | + |
| Cercopithecus_mona.fasta_Contig50  | 7165513  | 7165908  | HERVHF_gag  | + |
| Cercopithecus_mona.fasta_Contig50  | 7166047  | 7166619  | HERVHF_pro  | + |
| Cercopithecus_mona.fasta_Contig50  | 7166305  | 7168731  | HERVHF_pol  | + |
| Cercopithecus_mona.fasta_Contig50  | 7168978  | 7169346  | HERVHF_env  | + |
| Cercopithecus_mona.fasta_Contig50  | 7169696  | 7170000  | HERVHF_3LTR | + |
| Cercopithecus_mona.fasta_Contig51  | 3260046  | 3260448  | HERVHF_5LTR | - |
| Cercopithecus_mona.fasta_Contig51  | 3261492  | 3263408  | HERVHF_pol  | - |
| Cercopithecus_mona.fasta_Contig51  | 3263067  | 3263651  | HERVHF_pro  | - |
| Cercopithecus_mona.fasta_Contig51  | 3263766  | 3264113  | HERVHF_gag  | - |
| Cercopithecus_mona.fasta_Contig51  | 3265554  | 3265956  | HERVHF_3LTR | - |
| Cercopithecus_mona.fasta_Contig697 | 13968    | 14387    | HERVHF_5LTR | - |
| Cercopithecus_mona.fasta_Contig697 | 19215    | 21140    | HERVHF_pol  | - |
| Cercopithecus_mona.fasta_Contig697 | 21258    | 21914    | HERVHF_gag  | - |
| Cercopithecus_mona.fasta_Contig697 | 26398    | 26820    | HERVHF_3LTR | - |
| Cercopithecus_mona.fasta_Contig89  | 3714241  | 3714623  | HERVHF_5LTR | + |
| Cercopithecus_mona.fasta_Contig89  | 3716064  | 3716381  | HERVHF_gag  | + |
| Cercopithecus_mona.fasta_Contig89  | 3717659  | 3720376  | HERVHF_pol  | + |
| Cercopithecus_mona.fasta_Contig89  | 3720815  | 3721191  | HERVHF_3LTR | + |
| Cercopithecus_mona.fasta_Contig9   | 9863128  | 9863563  | HERVHF_5LTR | - |
| Cercopithecus_mona.fasta_Contig9   | 9864321  | 9864899  | HERVHF_pol  | - |
| Cercopithecus_mona.fasta_Contig9   | 9864914  | 9865246  | HERVHF_pro  | - |
| Cercopithecus_mona.fasta_Contig9   | 9865366  | 9865814  | HERVHF_3LTR | - |
| Cercopithecus_mona.fasta_Contig94  | 9312470  | 9312899  | HERVHF_5LTR | + |
| Cercopithecus_mona.fasta_Contig94  | 9314462  | 9314869  | HERVHF_gag  | + |
| Cercopithecus_mona.fasta_Contig94  | 9315298  | 9317309  | HERVHF_pol  | + |
| Cercopithecus_mona.fasta_Contig94  | 9317671  | 9319344  | HERVHF_env  | + |
| Cercopithecus_mona.fasta_Contig94  | 9319638  | 9320084  | HERVHF_3LTR | + |
| Chlorocebus_aethiops.fasta_ctg102  | 3569049  | 3569474  | HERVHF_5LTR | - |
| Chlorocebus_aethiops.fasta_ctg102  | 3570362  | 3572373  | HERVHF_pol  | - |
| Chlorocebus_aethiops.fasta_ctg102  | 3571840  | 3572616  | HERVHF_pro  | - |
| Chlorocebus_aethiops.fasta_ctg102  | 3572669  | 3572989  | HERVHF_gag  | - |

|                                   |         |         |             |   |
|-----------------------------------|---------|---------|-------------|---|
| Chlorocebus_aethiops.fasta_ctg102 | 3574459 | 3574877 | HERVHF_3LTR | - |
| Chlorocebus_aethiops.fasta_ctg104 | 2616456 | 2616964 | HERVK_5LTR  | + |
| Chlorocebus_aethiops.fasta_ctg104 | 2617978 | 2618481 | HERVK_gag   | + |
| Chlorocebus_aethiops.fasta_ctg104 | 2618608 | 2619213 | HERVK_pro   | + |
| Chlorocebus_aethiops.fasta_ctg104 | 2619078 | 2620653 | HERVK_pol   | + |
| Chlorocebus_aethiops.fasta_ctg104 | 2622344 | 2622840 | HERVK_3LTR  | + |
| Chlorocebus_aethiops.fasta_ctg11  | 9321016 | 9321342 | HERVHF_5LTR | + |
| Chlorocebus_aethiops.fasta_ctg11  | 9323664 | 9325763 | HERVHF_pol  | + |
| Chlorocebus_aethiops.fasta_ctg11  | 9326071 | 9326392 | HERVHF_3LTR | + |
| Chlorocebus_aethiops.fasta_ctg132 | 3927254 | 3927643 | HERVHF_5LTR | + |
| Chlorocebus_aethiops.fasta_ctg132 | 3929118 | 3929420 | HERVHF_gag  | + |
| Chlorocebus_aethiops.fasta_ctg132 | 3929452 | 3930294 | HERVHF_pro  | + |
| Chlorocebus_aethiops.fasta_ctg132 | 3929752 | 3932173 | HERVHF_pol  | + |
| Chlorocebus_aethiops.fasta_ctg132 | 3932761 | 3933161 | HERVHF_3LTR | + |
| Chlorocebus_aethiops.fasta_ctg139 | 487210  | 487629  | HERVHF_5LTR | + |
| Chlorocebus_aethiops.fasta_ctg139 | 489110  | 489442  | HERVHF_gag  | + |
| Chlorocebus_aethiops.fasta_ctg139 | 489456  | 490265  | HERVHF_pro  | + |
| Chlorocebus_aethiops.fasta_ctg139 | 489636  | 491364  | HERVHF_pol  | + |
| Chlorocebus_aethiops.fasta_ctg139 | 492188  | 492613  | HERVHF_3LTR | + |
| Chlorocebus_aethiops.fasta_ctg139 | 4349838 | 4350800 | HERVK_5LTR  | + |
| Chlorocebus_aethiops.fasta_ctg139 | 4351499 | 4352032 | HERVK_gag   | + |
| Chlorocebus_aethiops.fasta_ctg139 | 4352098 | 4353133 | HERVK_pro   | + |
| Chlorocebus_aethiops.fasta_ctg139 | 4353103 | 4353723 | HERVK_pol   | + |
| Chlorocebus_aethiops.fasta_ctg139 | 4354177 | 4355297 | HERVK_env   | + |
| Chlorocebus_aethiops.fasta_ctg139 | 4356223 | 4357188 | HERVK_3LTR  | + |
| Chlorocebus_aethiops.fasta_ctg145 | 1571057 | 1571376 | HERVHF_5LTR | + |
| Chlorocebus_aethiops.fasta_ctg145 | 1572487 | 1573311 | HERVHF_gag  | + |
| Chlorocebus_aethiops.fasta_ctg145 | 1573715 | 1574527 | HERVHF_pro  | + |
| Chlorocebus_aethiops.fasta_ctg145 | 1574084 | 1576236 | HERVHF_pol  | + |
| Chlorocebus_aethiops.fasta_ctg145 | 1578039 | 1578788 | HERVHF_env  | + |
| Chlorocebus_aethiops.fasta_ctg145 | 1579007 | 1579327 | HERVHF_3LTR | + |
| Chlorocebus_aethiops.fasta_ctg15  | 6104075 | 6104397 | HERVHF_5LTR | - |
| Chlorocebus_aethiops.fasta_ctg15  | 6105018 | 6107460 | HERVHF_pol  | - |
| Chlorocebus_aethiops.fasta_ctg15  | 6107678 | 6108304 | HERVHF_pro  | - |
| Chlorocebus_aethiops.fasta_ctg15  | 6108294 | 6108629 | HERVHF_gag  | - |
| Chlorocebus_aethiops.fasta_ctg15  | 6109987 | 6110318 | HERVHF_3LTR | - |
| Chlorocebus_aethiops.fasta_ctg159 | 2460744 | 2461194 | HERVHF_5LTR | - |
| Chlorocebus_aethiops.fasta_ctg159 | 2462074 | 2463580 | HERVHF_pol  | - |
| Chlorocebus_aethiops.fasta_ctg159 | 2466067 | 2466519 | HERVHF_3LTR | - |
| Chlorocebus_aethiops.fasta_ctg164 | 3248402 | 3248853 | HERVHF_5LTR | - |
| Chlorocebus_aethiops.fasta_ctg164 | 3249706 | 3251212 | HERVHF_pol  | - |
| Chlorocebus_aethiops.fasta_ctg164 | 3250805 | 3251401 | HERVHF_pro  | - |
| Chlorocebus_aethiops.fasta_ctg164 | 3251645 | 3251974 | HERVHF_gag  | - |
| Chlorocebus_aethiops.fasta_ctg164 | 3253658 | 3254110 | HERVHF_3LTR | - |

|                                   |          |          |             |   |
|-----------------------------------|----------|----------|-------------|---|
| Chlorocebus_aethiops.fasta_ctg165 | 2928619  | 2929482  | HERVHF_5LTR | + |
| Chlorocebus_aethiops.fasta_ctg165 | 2931212  | 2931901  | HERVHF_pro  | + |
| Chlorocebus_aethiops.fasta_ctg165 | 2931242  | 2933561  | HERVHF_pol  | + |
| Chlorocebus_aethiops.fasta_ctg165 | 2939216  | 2940095  | HERVHF_3LTR | + |
| Chlorocebus_aethiops.fasta_ctg173 | 4157982  | 4158356  | HERVHF_5LTR | + |
| Chlorocebus_aethiops.fasta_ctg173 | 4159781  | 4160110  | HERVHF_gag  | + |
| Chlorocebus_aethiops.fasta_ctg173 | 4161275  | 4164154  | HERVHF_pol  | + |
| Chlorocebus_aethiops.fasta_ctg173 | 4164592  | 4164970  | HERVHF_3LTR | + |
| Chlorocebus_aethiops.fasta_ctg18  | 6403973  | 6404371  | HERVHF_5LTR | + |
| Chlorocebus_aethiops.fasta_ctg18  | 6406380  | 6406997  | HERVHF_pro  | + |
| Chlorocebus_aethiops.fasta_ctg18  | 6406823  | 6408432  | HERVHF_pol  | + |
| Chlorocebus_aethiops.fasta_ctg18  | 6409123  | 6409527  | HERVHF_3LTR | + |
| Chlorocebus_aethiops.fasta_ctg19  | 18927737 | 18928118 | HERVHF_5LTR | - |
| Chlorocebus_aethiops.fasta_ctg19  | 18928338 | 18929621 | HERVHF_pol  | - |
| Chlorocebus_aethiops.fasta_ctg19  | 18931241 | 18931609 | HERVHF_3LTR | - |
| Chlorocebus_aethiops.fasta_ctg2   | 5078446  | 5078746  | HERVHF_5LTR | - |
| Chlorocebus_aethiops.fasta_ctg2   | 5086948  | 5088628  | HERVHF_pol  | - |
| Chlorocebus_aethiops.fasta_ctg2   | 5088338  | 5089000  | HERVHF_pro  | - |
| Chlorocebus_aethiops.fasta_ctg2   | 5089167  | 5089634  | HERVHF_gag  | - |
| Chlorocebus_aethiops.fasta_ctg2   | 5091180  | 5091484  | HERVHF_3LTR | - |
| Chlorocebus_aethiops.fasta_ctg20  | 11231407 | 11231857 | HERVHF_5LTR | + |
| Chlorocebus_aethiops.fasta_ctg20  | 11233545 | 11233865 | HERVHF_gag  | + |
| Chlorocebus_aethiops.fasta_ctg20  | 11233921 | 11234697 | HERVHF_pro  | + |
| Chlorocebus_aethiops.fasta_ctg20  | 11234053 | 11235562 | HERVHF_pol  | + |
| Chlorocebus_aethiops.fasta_ctg20  | 11236414 | 11236865 | HERVHF_3LTR | + |
| Chlorocebus_aethiops.fasta_ctg202 | 4661633  | 4662087  | HERVHF_5LTR | - |
| Chlorocebus_aethiops.fasta_ctg202 | 4662771  | 4664679  | HERVHF_pol  | - |
| Chlorocebus_aethiops.fasta_ctg202 | 4666887  | 4667327  | HERVHF_3LTR | - |
| Chlorocebus_aethiops.fasta_ctg210 | 1810756  | 1811075  | HERVK_5LTR  | + |
| Chlorocebus_aethiops.fasta_ctg210 | 1811680  | 1812228  | HERVK_gag   | + |
| Chlorocebus_aethiops.fasta_ctg210 | 1812957  | 1813400  | HERVK_pro   | + |
| Chlorocebus_aethiops.fasta_ctg210 | 1813513  | 1815420  | HERVK_pol   | + |
| Chlorocebus_aethiops.fasta_ctg210 | 1816667  | 1816982  | HERVK_3LTR  | + |
| Chlorocebus_aethiops.fasta_ctg227 | 2079627  | 2080004  | HERVHF_5LTR | + |
| Chlorocebus_aethiops.fasta_ctg227 | 2082194  | 2082949  | HERVHF_pro  | + |
| Chlorocebus_aethiops.fasta_ctg227 | 2082332  | 2084085  | HERVHF_pol  | + |
| Chlorocebus_aethiops.fasta_ctg227 | 2084766  | 2085138  | HERVHF_3LTR | + |
| Chlorocebus_aethiops.fasta_ctg233 | 3044711  | 3045174  | HERVHF_5LTR | + |
| Chlorocebus_aethiops.fasta_ctg233 | 3045922  | 3047115  | HERVHF_gag  | + |
| Chlorocebus_aethiops.fasta_ctg233 | 3047598  | 3050190  | HERVHF_pol  | + |
| Chlorocebus_aethiops.fasta_ctg233 | 3050907  | 3051385  | HERVHF_3LTR | + |
| Chlorocebus_aethiops.fasta_ctg234 | 2817986  | 2818387  | HERVHF_5LTR | - |
| Chlorocebus_aethiops.fasta_ctg234 | 2818624  | 2818986  | HERVHF_env  | - |
| Chlorocebus_aethiops.fasta_ctg234 | 2819796  | 2822414  | HERVHF_pol  | - |

|                                   |          |          |                |   |
|-----------------------------------|----------|----------|----------------|---|
| Chlorocebus_aethiops.fasta_ctg234 | 2825131  | 2825531  | HERVHF_3LTR    | - |
| Chlorocebus_aethiops.fasta_ctg26  | 15520778 | 15521433 | HERVHF_5LTR    | - |
| Chlorocebus_aethiops.fasta_ctg26  | 15525068 | 15527486 | HERVHF_pol     | - |
| Chlorocebus_aethiops.fasta_ctg26  | 15526989 | 15527621 | HERVHF_pro     | - |
| Chlorocebus_aethiops.fasta_ctg26  | 15529489 | 15530145 | HERVHF_3LTR    | - |
| Chlorocebus_aethiops.fasta_ctg279 | 888263   | 888642   | HERVHF_5LTR    | - |
| Chlorocebus_aethiops.fasta_ctg279 | 889728   | 892455   | HERVHF_pol     | - |
| Chlorocebus_aethiops.fasta_ctg279 | 891817   | 892617   | HERVHF_pro     | - |
| Chlorocebus_aethiops.fasta_ctg279 | 894820   | 895197   | HERVHF_3LTR    | - |
| Chlorocebus_aethiops.fasta_ctg296 | 1422758  | 1423151  | HERVHF_5LTR    | - |
| Chlorocebus_aethiops.fasta_ctg296 | 1423839  | 1426228  | HERVHF_pol     | - |
| Chlorocebus_aethiops.fasta_ctg296 | 1425590  | 1426321  | HERVHF_pro     | - |
| Chlorocebus_aethiops.fasta_ctg296 | 1426420  | 1426761  | HERVHF_gag     | - |
| Chlorocebus_aethiops.fasta_ctg296 | 1428350  | 1428728  | HERVHF_3LTR    | - |
| Chlorocebus_aethiops.fasta_ctg311 | 1397349  | 1397820  | HERVK_5LTR     | - |
| Chlorocebus_aethiops.fasta_ctg311 | 1399094  | 1400008  | HERVK_pol      | - |
| Chlorocebus_aethiops.fasta_ctg311 | 1399867  | 1400544  | HERVK_pro      | - |
| Chlorocebus_aethiops.fasta_ctg311 | 1401634  | 1402108  | HERVK_3LTR     | - |
| Chlorocebus_aethiops.fasta_ctg33  | 13788944 | 13789415 | HERVK_5LTR     | + |
| Chlorocebus_aethiops.fasta_ctg33  | 13790363 | 13791010 | HERVK_pro      | + |
| Chlorocebus_aethiops.fasta_ctg33  | 13791170 | 13791913 | HERVK_pol      | + |
| Chlorocebus_aethiops.fasta_ctg33  | 13792948 | 13793337 | HERVK_env      | + |
| Chlorocebus_aethiops.fasta_ctg33  | 13793341 | 13793821 | HERVK_3LTR     | + |
| Chlorocebus_aethiops.fasta_ctg351 | 1287394  | 1287716  | HERVIPADP_5LTR | - |
| Chlorocebus_aethiops.fasta_ctg351 | 1288929  | 1289432  | HERVIPADP_env  | - |
| Chlorocebus_aethiops.fasta_ctg351 | 1290289  | 1293948  | HERVIPADP_pol  | - |
| Chlorocebus_aethiops.fasta_ctg351 | 1294437  | 1294754  | HERVIPADP_gag  | - |
| Chlorocebus_aethiops.fasta_ctg351 | 1296251  | 1296578  | HERVIPADP_3LTR | - |
| Chlorocebus_aethiops.fasta_ctg365 | 491533   | 491966   | HERVHF_5LTR    | + |
| Chlorocebus_aethiops.fasta_ctg365 | 494130   | 494993   | HERVHF_pro     | + |
| Chlorocebus_aethiops.fasta_ctg365 | 494325   | 496767   | HERVHF_pol     | + |
| Chlorocebus_aethiops.fasta_ctg365 | 496989   | 497342   | HERVHF_env     | + |
| Chlorocebus_aethiops.fasta_ctg365 | 497606   | 498038   | HERVHF_3LTR    | + |
| Chlorocebus_aethiops.fasta_ctg37  | 6210373  | 6210806  | HERVHF_5LTR    | + |
| Chlorocebus_aethiops.fasta_ctg37  | 6212161  | 6212484  | HERVHF_gag     | + |
| Chlorocebus_aethiops.fasta_ctg37  | 6212981  | 6215573  | HERVHF_pol     | + |
| Chlorocebus_aethiops.fasta_ctg37  | 6216168  | 6216598  | HERVHF_3LTR    | + |
| Chlorocebus_aethiops.fasta_ctg370 | 1320946  | 1321412  | HERVK_5LTR     | + |
| Chlorocebus_aethiops.fasta_ctg370 | 1321958  | 1322572  | HERVK_gag      | + |
| Chlorocebus_aethiops.fasta_ctg370 | 1323152  | 1323811  | HERVK_pro      | + |
| Chlorocebus_aethiops.fasta_ctg370 | 1323691  | 1325224  | HERVK_pol      | + |
| Chlorocebus_aethiops.fasta_ctg370 | 1326733  | 1327201  | HERVK_3LTR     | + |
| Chlorocebus_aethiops.fasta_ctg392 | 297736   | 298130   | HERVK_5LTR     | + |
| Chlorocebus_aethiops.fasta_ctg392 | 299075   | 299836   | HERVK_pro      | + |

|                                   |          |          |             |   |
|-----------------------------------|----------|----------|-------------|---|
| Chlorocebus_aethiops.fasta_ctg392 | 299889   | 301805   | HERVK_pol   | + |
| Chlorocebus_aethiops.fasta_ctg392 | 302816   | 303225   | HERVK_3LTR  | + |
| Chlorocebus_aethiops.fasta_ctg4   | 24809421 | 24809931 | HERVK_5LTR  | - |
| Chlorocebus_aethiops.fasta_ctg4   | 24810010 | 24810360 | HERVK_env   | - |
| Chlorocebus_aethiops.fasta_ctg4   | 24810794 | 24812077 | HERVK_pol   | - |
| Chlorocebus_aethiops.fasta_ctg4   | 24811981 | 24812737 | HERVK_pro   | - |
| Chlorocebus_aethiops.fasta_ctg4   | 24812856 | 24813314 | HERVK_gag   | - |
| Chlorocebus_aethiops.fasta_ctg4   | 24814277 | 24814798 | HERVK_3LTR  | - |
| Chlorocebus_aethiops.fasta_ctg4   | 42159023 | 42159433 | HERVHF_5LTR | + |
| Chlorocebus_aethiops.fasta_ctg4   | 42161876 | 42162469 | HERVHF_pro  | + |
| Chlorocebus_aethiops.fasta_ctg4   | 42161969 | 42163051 | HERVHF_pol  | + |
| Chlorocebus_aethiops.fasta_ctg4   | 42165310 | 42165721 | HERVHF_3LTR | + |
| Chlorocebus_aethiops.fasta_ctg40  | 5910859  | 5911183  | HERVHF_5LTR | - |
| Chlorocebus_aethiops.fasta_ctg40  | 5911329  | 5911691  | HERVHF_env  | - |
| Chlorocebus_aethiops.fasta_ctg40  | 5912974  | 5914698  | HERVHF_pol  | - |
| Chlorocebus_aethiops.fasta_ctg40  | 5915323  | 5916432  | HERVHF_gag  | - |
| Chlorocebus_aethiops.fasta_ctg40  | 5917193  | 5917514  | HERVHF_3LTR | - |
| Chlorocebus_aethiops.fasta_ctg43  | 4252657  | 4253089  | HERVHF_5LTR | + |
| Chlorocebus_aethiops.fasta_ctg43  | 4254601  | 4254927  | HERVHF_gag  | + |
| Chlorocebus_aethiops.fasta_ctg43  | 4254917  | 4255402  | HERVHF_pro  | + |
| Chlorocebus_aethiops.fasta_ctg43  | 4255582  | 4257422  | HERVHF_pol  | + |
| Chlorocebus_aethiops.fasta_ctg43  | 4258224  | 4258662  | HERVHF_3LTR | + |
| Chlorocebus_aethiops.fasta_ctg49  | 8657806  | 8658240  | HERVHF_5LTR | - |
| Chlorocebus_aethiops.fasta_ctg49  | 8658721  | 8661189  | HERVHF_pol  | - |
| Chlorocebus_aethiops.fasta_ctg49  | 8661498  | 8662456  | HERVHF_gag  | - |
| Chlorocebus_aethiops.fasta_ctg49  | 8663392  | 8663828  | HERVHF_3LTR | - |
| Chlorocebus_aethiops.fasta_ctg51  | 14094052 | 14094416 | HERVHF_5LTR | - |
| Chlorocebus_aethiops.fasta_ctg51  | 14095297 | 14097789 | HERVHF_pol  | - |
| Chlorocebus_aethiops.fasta_ctg51  | 14097037 | 14097936 | HERVHF_pro  | - |
| Chlorocebus_aethiops.fasta_ctg51  | 14098580 | 14098950 | HERVHF_3LTR | - |
| Chlorocebus_aethiops.fasta_ctg51  | 44688797 | 44689115 | HERVHF_5LTR | + |
| Chlorocebus_aethiops.fasta_ctg51  | 44690699 | 44691046 | HERVHF_gag  | + |
| Chlorocebus_aethiops.fasta_ctg51  | 44691348 | 44692106 | HERVHF_pol  | + |
| Chlorocebus_aethiops.fasta_ctg51  | 44692414 | 44692755 | HERVHF_env  | + |
| Chlorocebus_aethiops.fasta_ctg51  | 44693040 | 44693364 | HERVHF_3LTR | + |
| Chlorocebus_aethiops.fasta_ctg54  | 1221026  | 1221458  | HERVHF_5LTR | + |
| Chlorocebus_aethiops.fasta_ctg54  | 1223519  | 1223845  | HERVHF_gag  | + |
| Chlorocebus_aethiops.fasta_ctg54  | 1223851  | 1224363  | HERVHF_pro  | + |
| Chlorocebus_aethiops.fasta_ctg54  | 1226339  | 1228006  | HERVHF_pol  | + |
| Chlorocebus_aethiops.fasta_ctg54  | 1228835  | 1229262  | HERVHF_3LTR | + |
| Chlorocebus_aethiops.fasta_ctg58  | 6848909  | 6849275  | HERVHF_5LTR | + |
| Chlorocebus_aethiops.fasta_ctg58  | 6851157  | 6851927  | HERVHF_pro  | + |
| Chlorocebus_aethiops.fasta_ctg58  | 6851364  | 6853577  | HERVHF_pol  | + |
| Chlorocebus_aethiops.fasta_ctg58  | 6854481  | 6854832  | HERVHF_3LTR | + |

|                                   |           |           |             |   |
|-----------------------------------|-----------|-----------|-------------|---|
| Chlorocebus_aethiops.fasta_ctg58  | 9677674   | 9678022   | HERVHF_5LTR | - |
| Chlorocebus_aethiops.fasta_ctg58  | 9678769   | 9680650   | HERVHF_pol  | - |
| Chlorocebus_aethiops.fasta_ctg58  | 9680078   | 9680863   | HERVHF_pro  | - |
| Chlorocebus_aethiops.fasta_ctg58  | 9680915   | 9681397   | HERVHF_gag  | - |
| Chlorocebus_aethiops.fasta_ctg58  | 9682908   | 9683263   | HERVHF_3LTR | - |
| Chlorocebus_aethiops.fasta_ctg64  | 4755886   | 4756273   | HERVHF_5LTR | + |
| Chlorocebus_aethiops.fasta_ctg64  | 4757939   | 4758256   | HERVHF_gag  | + |
| Chlorocebus_aethiops.fasta_ctg64  | 4758273   | 4758902   | HERVHF_pro  | + |
| Chlorocebus_aethiops.fasta_ctg64  | 4758669   | 4760141   | HERVHF_pol  | + |
| Chlorocebus_aethiops.fasta_ctg64  | 4761033   | 4761430   | HERVHF_3LTR | + |
| Chlorocebus_aethiops.fasta_ctg71  | 22910460  | 22910890  | HERVHF_5LTR | + |
| Chlorocebus_aethiops.fasta_ctg71  | 22912243  | 22912644  | HERVHF_gag  | + |
| Chlorocebus_aethiops.fasta_ctg71  | 22913568  | 22916242  | HERVHF_pol  | + |
| Chlorocebus_aethiops.fasta_ctg71  | 22915952  | 22916302  | HERVHF_env  | + |
| Chlorocebus_aethiops.fasta_ctg71  | 22916466  | 22916892  | HERVHF_3LTR | + |
| Chlorocebus_aethiops.fasta_ctg75  | 13760343  | 13760703  | HERVHF_5LTR | + |
| Chlorocebus_aethiops.fasta_ctg75  | 13762467  | 13762832  | HERVHF_gag  | + |
| Chlorocebus_aethiops.fasta_ctg75  | 13762822  | 13763205  | HERVHF_pro  | + |
| Chlorocebus_aethiops.fasta_ctg75  | 13763185  | 13763838  | HERVHF_pol  | + |
| Chlorocebus_aethiops.fasta_ctg75  | 13764838  | 13765242  | HERVHF_env  | + |
| Chlorocebus_aethiops.fasta_ctg75  | 13765408  | 13765783  | HERVHF_3LTR | + |
| Chlorocebus_aethiops.fasta_ctg796 | 39143     | 39475     | HERVHF_5LTR | + |
| Chlorocebus_aethiops.fasta_ctg796 | 40861     | 41280     | HERVHF_gag  | + |
| Chlorocebus_aethiops.fasta_ctg796 | 41743     | 43967     | HERVHF_pol  | + |
| Chlorocebus_aethiops.fasta_ctg796 | 45357     | 45678     | HERVHF_3LTR | + |
| Chlorocebus_aethiops.fasta_ctg88  | 3482807   | 3483177   | HERVHF_5LTR | - |
| Chlorocebus_aethiops.fasta_ctg88  | 3483338   | 3483721   | HERVHF_env  | - |
| Chlorocebus_aethiops.fasta_ctg88  | 3484204   | 3486048   | HERVHF_pol  | - |
| Chlorocebus_aethiops.fasta_ctg88  | 3485911   | 3486783   | HERVHF_pro  | - |
| Chlorocebus_aethiops.fasta_ctg88  | 3486987   | 3487407   | HERVHF_gag  | - |
| Chlorocebus_aethiops.fasta_ctg88  | 3488744   | 3489127   | HERVHF_3LTR | - |
| Chlorocebus_aethiops.fasta_ctg88  | 16714757  | 16715196  | HERVHF_5LTR | - |
| Chlorocebus_aethiops.fasta_ctg88  | 16715746  | 16716129  | HERVHF_env  | - |
| Chlorocebus_aethiops.fasta_ctg88  | 16716130  | 16717781  | HERVHF_pol  | - |
| Chlorocebus_aethiops.fasta_ctg88  | 16717170  | 16717928  | HERVHF_pro  | - |
| Chlorocebus_aethiops.fasta_ctg88  | 16719959  | 16720400  | HERVHF_3LTR | - |
| Chlorocebus_sabaeus_CM001941.2    | 124554238 | 124554610 | HERVHF_5LTR | + |
| Chlorocebus_sabaeus_CM001941.2    | 124556251 | 124556730 | HERVHF_gag  | + |
| Chlorocebus_sabaeus_CM001941.2    | 124556763 | 124557185 | HERVHF_pro  | + |
| Chlorocebus_sabaeus_CM001941.2    | 124557097 | 124558558 | HERVHF_pol  | + |
| Chlorocebus_sabaeus_CM001941.2    | 124559835 | 124560222 | HERVHF_3LTR | + |
| Chlorocebus_sabaeus_CM001942.1    | 26759264  | 26759615  | HERVHF_5LTR | - |



Chlorocebus\_sabaeus\_CM001942.1 26760653 26762554 HERVHF\_pol -  
 Chlorocebus\_sabaeus\_CM001942.1 26762491 26762964 HERVHF\_pro -  
 Chlorocebus\_sabaeus\_CM001942.1 26764827 26765193 HERVHF\_3LTR -  
 Chlorocebus\_sabaeus\_CM001942.1 51295834 51296180 HERVHF\_5LTR -  
 Chlorocebus\_sabaeus\_CM001942.1 51296929 51298810 HERVHF\_pol -  
 Chlorocebus\_sabaeus\_CM001942.1 51298238 51299023 HERVHF\_pro -  
 Chlorocebus\_sabaeus\_CM001942.1 51299079 51299494 HERVHF\_gag -  
 Chlorocebus\_sabaeus\_CM001942.1 51301069 51301424 HERVHF\_3LTR -  
 Chlorocebus\_sabaeus\_CM001943.2 26067073 26067510 HERVHF\_5LTR -  
 Chlorocebus\_sabaeus\_CM001943.2 26068101 26070151 HERVHF\_pol -  
 Chlorocebus\_sabaeus\_CM001943.2 26069980 26070816 HERVHF\_pro -  
 Chlorocebus\_sabaeus\_CM001943.2 26070809 26071129 HERVHF\_gag -  
 Chlorocebus\_sabaeus\_CM001943.2 26072618 26073051 HERVHF\_3LTR -  
 Chlorocebus\_sabaeus\_CM001943.2 61191237 61191573 HERVK\_5LTR +  
 Chlorocebus\_sabaeus\_CM001943.2 61193346 61194098 HERVK\_pro +  
 Chlorocebus\_sabaeus\_CM001943.2 61193993 61194778 HERVK\_pol +  
 Chlorocebus\_sabaeus\_CM001943.2 61196025 61196360 HERVK\_3LTR +  
 Chlorocebus\_sabaeus\_CM001943.2 65314867 65315331 HERVHF\_5LTR -  
 Chlorocebus\_sabaeus\_CM001943.2 65315516 65316316 HERVHF\_env -  
 Chlorocebus\_sabaeus\_CM001943.2 65316969 65317598 HERVHF\_pol -  
 Chlorocebus\_sabaeus\_CM001943.2 65317032 65317658 HERVHF\_pro -  
 Chlorocebus\_sabaeus\_CM001943.2 65318382 65318831 HERVHF\_gag -  
 Chlorocebus\_sabaeus\_CM001943.2 65319826 65320292 HERVHF\_3LTR -  
 Chlorocebus\_sabaeus\_CM001946.1 49129441 49129755 HERVK\_5LTR -  
 Chlorocebus\_sabaeus\_CM001946.1 49130993 49132870 HERVK\_pol -  
 Chlorocebus\_sabaeus\_CM001946.1 49133027 49133455 HERVK\_pro -  
 Chlorocebus\_sabaeus\_CM001946.1 49134049 49134528 HERVK\_gag -  
 Chlorocebus\_sabaeus\_CM001946.1 49135335 49135656 HERVK\_3LTR -  
 Chlorocebus\_sabaeus\_CM001947.1 22397295 22397609 HERVK\_5LTR +  
 Chlorocebus\_sabaeus\_CM001947.1 22399875 22402393 HERVK\_pol +  
 Chlorocebus\_sabaeus\_CM001947.1 22403889 22404509 HERVK\_env +  
 Chlorocebus\_sabaeus\_CM001947.1 22404565 22404872 HERVK\_3LTR +  
 Chlorocebus\_sabaeus\_CM001947.1 79412161 79412579 HERVK\_5LTR -  
 Chlorocebus\_sabaeus\_CM001947.1 79413507 79415407 HERVK\_pol -  
 Chlorocebus\_sabaeus\_CM001947.1 79415387 79416241 HERVK\_pro -  
 Chlorocebus\_sabaeus\_CM001947.1 79417718 79418139 HERVK\_3LTR -  
 Chlorocebus\_sabaeus\_CM001949.2 32139244 32139609 HERVHF\_5LTR +  
 Chlorocebus\_sabaeus\_CM001949.2 32140288 32141444 HERVHF\_gag +  
 Chlorocebus\_sabaeus\_CM001949.2 32141979 32143066 HERVHF\_pol +  
 Chlorocebus\_sabaeus\_CM001949.2 32143498 32143861 HERVHF\_3LTR +  
 Chlorocebus\_sabaeus\_CM001950.2 10649785 10650281 HERVK\_5LTR -  
 Chlorocebus\_sabaeus\_CM001950.2 10650288 10650626 HERVK\_env -  
 Chlorocebus\_sabaeus\_CM001950.2 10651737 10653357 HERVK\_pol -  
 Chlorocebus\_sabaeus\_CM001950.2 10653435 10653983 HERVK\_pro -

Chlorocebus\_sabaeus\_CM001950.2 10655618 10656126 HERVK\_3LTR -  
 Chlorocebus\_sabaeus\_CM001950.2 52581101 52581510 HERVK\_5LTR -  
 Chlorocebus\_sabaeus\_CM001950.2 52581666 52582412 HERVK\_env -  
 Chlorocebus\_sabaeus\_CM001950.2 52582523 52584456 HERVK\_pol -  
 Chlorocebus\_sabaeus\_CM001950.2 52584351 52585271 HERVK\_pro -  
 Chlorocebus\_sabaeus\_CM001950.2 52586213 52586607 HERVK\_3LTR -  
 Chlorocebus\_sabaeus\_CM001951.2 59688168 59688513 HSERVIII\_5LTR -  
 Chlorocebus\_sabaeus\_CM001951.2 59688940 59692107 HSERVIII\_pol -  
 Chlorocebus\_sabaeus\_CM001951.2 59694139 59694484 HSERVIII\_3LTR -  
 Chlorocebus\_sabaeus\_CM001951.2 77116245 77116587 HERVHF\_5LTR +  
 Chlorocebus\_sabaeus\_CM001951.2 77118630 77119624 HERVHF\_pro +  
 Chlorocebus\_sabaeus\_CM001951.2 77118815 77121868 HERVHF\_pol +  
 Chlorocebus\_sabaeus\_CM001951.2 77123183 77123788 HERVHF\_env +  
 Chlorocebus\_sabaeus\_CM001951.2 77124099 77124451 HERVHF\_3LTR +  
 Chlorocebus\_sabaeus\_CM001952.2 35808120 35808472 HERVHF\_5LTR +  
 Chlorocebus\_sabaeus\_CM001952.2 35810252 35810581 HERVHF\_gag +  
 Chlorocebus\_sabaeus\_CM001952.2 35810879 35812520 HERVHF\_pol +  
 Chlorocebus\_sabaeus\_CM001952.2 35813371 35813735 HERVHF\_3LTR +  
 Chlorocebus\_sabaeus\_CM001952.2 71846023 71846344 HERVHF\_5LTR -  
 Chlorocebus\_sabaeus\_CM001952.2 71846654 71848753 HERVHF\_pol -  
 Chlorocebus\_sabaeus\_CM001952.2 71851073 71851399 HERVHF\_3LTR -  
 Chlorocebus\_sabaeus\_CM001953.2 4824692 4825093 HERVHF\_5LTR -  
 Chlorocebus\_sabaeus\_CM001953.2 4825378 4825899 HERVHF\_env -  
 Chlorocebus\_sabaeus\_CM001953.2 4825991 4829203 HERVHF\_pol -  
 Chlorocebus\_sabaeus\_CM001953.2 4828844 4829269 HERVHF\_pro -  
 Chlorocebus\_sabaeus\_CM001953.2 4829955 4830296 HERVHF\_gag -  
 Chlorocebus\_sabaeus\_CM001953.2 4831915 4832315 HERVHF\_3LTR -  
 Chlorocebus\_sabaeus\_CM001954.1 50219255 50219679 HERVHF\_5LTR -  
 Chlorocebus\_sabaeus\_CM001954.1 50220095 50222232 HERVHF\_pol -  
 Chlorocebus\_sabaeus\_CM001954.1 50221603 50222412 HERVHF\_pro -  
 Chlorocebus\_sabaeus\_CM001954.1 50222494 50222832 HERVHF\_gag -  
 Chlorocebus\_sabaeus\_CM001954.1 50224232 50224651 HERVHF\_3LTR -  
 Chlorocebus\_sabaeus\_CM001954.1 61922288 61922648 HERVHF\_5LTR +  
 Chlorocebus\_sabaeus\_CM001954.1 61924720 61925481 HERVHF\_pro +  
 Chlorocebus\_sabaeus\_CM001954.1 61924900 61926691 HERVHF\_pol +  
 Chlorocebus\_sabaeus\_CM001954.1 61927297 61927659 HERVHF\_3LTR +  
 Chlorocebus\_sabaeus\_CM001955.2 1848999 1849361 HERVHF\_5LTR -  
 Chlorocebus\_sabaeus\_CM001955.2 1850054 1851820 HERVHF\_pol -  
 Chlorocebus\_sabaeus\_CM001955.2 1851239 1852018 HERVHF\_pro -  
 Chlorocebus\_sabaeus\_CM001955.2 1854198 1854561 HERVHF\_3LTR -  
 Chlorocebus\_sabaeus\_CM001955.2 34015812 34016174 HERVHF\_5LTR -  
 Chlorocebus\_sabaeus\_CM001955.2 34017073 34019508 HERVHF\_pol -  
 Chlorocebus\_sabaeus\_CM001955.2 34018966 34019706 HERVHF\_pro -  
 Chlorocebus\_sabaeus\_CM001955.2 34020338 34020708 HERVHF\_3LTR -

Chlorocebus\_sabaeus\_CM001955.2 64275207 64275525 HERVHF\_5LTR +  
 Chlorocebus\_sabaeus\_CM001955.2 64277290 64277657 HERVHF\_gag +  
 Chlorocebus\_sabaeus\_CM001955.2 64277939 64278697 HERVHF\_pol +  
 Chlorocebus\_sabaeus\_CM001955.2 64279005 64279343 HERVHF\_env +  
 Chlorocebus\_sabaeus\_CM001955.2 64279635 64279959 HERVHF\_3LTR +  
 Chlorocebus\_sabaeus\_CM001956.2 75902540 75902990 HERVHF\_5LTR -  
 Chlorocebus\_sabaeus\_CM001956.2 75903650 75905377 HERVHF\_pol -  
 Chlorocebus\_sabaeus\_CM001956.2 75905696 75906016 HERVHF\_gag -  
 Chlorocebus\_sabaeus\_CM001956.2 75908022 75908474 HERVHF\_3LTR -  
 Chlorocebus\_sabaeus\_CM001958.2 8203185 8203603 HERVHF\_5LTR +  
 Chlorocebus\_sabaeus\_CM001958.2 8204950 8205393 HERVHF\_gag +  
 Chlorocebus\_sabaeus\_CM001958.2 8205449 8206225 HERVHF\_pro +  
 Chlorocebus\_sabaeus\_CM001958.2 8205689 8207748 HERVHF\_pol +  
 Chlorocebus\_sabaeus\_CM001958.2 8208620 8209045 HERVHF\_3LTR +  
 Chlorocebus\_sabaeus\_CM001959.2 45510761 45511215 HERVHF\_5LTR -  
 Chlorocebus\_sabaeus\_CM001959.2 45511899 45513717 HERVHF\_pol -  
 Chlorocebus\_sabaeus\_CM001959.2 45513874 45514227 HERVHF\_pro -  
 Chlorocebus\_sabaeus\_CM001959.2 45516073 45516513 HERVHF\_3LTR -  
 Chlorocebus\_sabaeus\_CM001961.2 55726990 55727340 HERVK\_5LTR +  
 Chlorocebus\_sabaeus\_CM001961.2 55727724 55728251 HERVK\_gag +  
 Chlorocebus\_sabaeus\_CM001961.2 55728758 55729494 HERVK\_pro +  
 Chlorocebus\_sabaeus\_CM001961.2 55729583 55731488 HERVK\_pol +  
 Chlorocebus\_sabaeus\_CM001961.2 55732465 55732800 HERVK\_3LTR +  
 Chlorocebus\_sabaeus\_CM001961.2 119078011 119078327 HERVIPADP\_5LTR +  
  
 Chlorocebus\_sabaeus\_CM001961.2 119085638 119085955 HERVIPADP\_gag +  
  
 Chlorocebus\_sabaeus\_CM001961.2 119086444 119090092 HERVIPADP\_pol +  
  
 Chlorocebus\_sabaeus\_CM001961.2 119090985 119091464 HERVIPADP\_env +  
  
 Chlorocebus\_sabaeus\_CM001961.2 119091860 119092169 HERVIPADP\_3LTR +  
  
 Chlorocebus\_sabaeus\_CM001962.2 2129070 2129536 HERVK\_5LTR +  
 Chlorocebus\_sabaeus\_CM001962.2 2130082 2130696 HERVK\_gag +  
 Chlorocebus\_sabaeus\_CM001962.2 2131276 2131935 HERVK\_pro +  
 Chlorocebus\_sabaeus\_CM001962.2 2131896 2133375 HERVK\_pol +  
 Chlorocebus\_sabaeus\_CM001962.2 2134853 2135321 HERVK\_3LTR +  
 Chlorocebus\_sabaeus\_CM001962.2 61959408 61959819 HERVHF\_5LTR -  
 Chlorocebus\_sabaeus\_CM001962.2 61961229 61963119 HERVHF\_pol -  
 Chlorocebus\_sabaeus\_CM001962.2 61962637 61963257 HERVHF\_pro -  
 Chlorocebus\_sabaeus\_CM001962.2 61965740 61966150 HERVHF\_3LTR -  
 Chlorocebus\_sabaeus\_CM001962.2 64630992 64631446 HERVHF\_5LTR -  
 Chlorocebus\_sabaeus\_CM001962.2 64631887 64633650 HERVHF\_pol -

Chlorocebus\_sabaeus\_CM001962.2 64633357 64634004 HERVHF\_pro -  
 Chlorocebus\_sabaeus\_CM001962.2 64634273 64634605 HERVHF\_gag -  
 Chlorocebus\_sabaeus\_CM001962.2 64636282 64636736 HERVHF\_3LTR -  
 Chlorocebus\_sabaeus\_CM001962.2 78895927 78896448 HERVK\_5LTR +  
 Chlorocebus\_sabaeus\_CM001962.2 78896606 78897870 HERVK\_gag +  
 Chlorocebus\_sabaeus\_CM001962.2 78897986 78898405 HERVK\_pro +  
 Chlorocebus\_sabaeus\_CM001962.2 78898620 78900002 HERVK\_pol +  
 Chlorocebus\_sabaeus\_CM001962.2 78900085 78900714 HERVK\_env +  
 Chlorocebus\_sabaeus\_CM001962.2 78900790 78901301 HERVK\_3LTR +  
 Chlorocebus\_sabaeus\_CM001963.2 7782589 7783100 HERVK\_5LTR -  
 Chlorocebus\_sabaeus\_CM001963.2 7783181 7783615 HERVK\_env -  
 Chlorocebus\_sabaeus\_CM001963.2 7784603 7785958 HERVK\_pol -  
 Chlorocebus\_sabaeus\_CM001963.2 7785853 7786866 HERVK\_pro -  
 Chlorocebus\_sabaeus\_CM001963.2 7788206 7788731 HERVK\_3LTR -  
 Chlorocebus\_sabaeus\_CM001964.1 64596469 64596949 HERVK\_5LTR -  
 Chlorocebus\_sabaeus\_CM001964.1 64598415 64599125 HERVK\_pol -  
 Chlorocebus\_sabaeus\_CM001964.1 64599267 64599929 HERVK\_pro -  
 Chlorocebus\_sabaeus\_CM001964.1 64599564 64600106 HERVK\_gag -  
 Chlorocebus\_sabaeus\_CM001964.1 64600873 64601344 HERVK\_3LTR -  
 Chlorocebus\_sabaeus\_CM001965.2 70373149 70373539 HERVIPADP\_5LTR -  
 Chlorocebus\_sabaeus\_CM001965.2 70374006 70374632 HERVIPADP\_env -  
 Chlorocebus\_sabaeus\_CM001965.2 70376824 70378861 HERVIPADP\_pol -  
 Chlorocebus\_sabaeus\_CM001965.2 70381991 70382372 HERVIPADP\_3LTR -  
 Chlorocebus\_sabaeus\_CM001965.2 79276322 79276722 HERVHF\_5LTR -  
 Chlorocebus\_sabaeus\_CM001965.2 79277313 79279734 HERVHF\_pol -  
 Chlorocebus\_sabaeus\_CM001965.2 79279192 79280034 HERVHF\_pro -  
 Chlorocebus\_sabaeus\_CM001965.2 79280066 79280594 HERVHF\_gag -  
 Chlorocebus\_sabaeus\_CM001965.2 79281841 79282230 HERVHF\_3LTR -  
 Chlorocebus\_sabaeus\_CM001966.2 5193014 5193681 HERVHF\_5LTR +  
 Chlorocebus\_sabaeus\_CM001966.2 5195676 5196281 HERVHF\_pro +  
 Chlorocebus\_sabaeus\_CM001966.2 5195679 5198143 HERVHF\_pol +  
 Chlorocebus\_sabaeus\_CM001966.2 5201733 5202406 HERVHF\_3LTR +  
 Chlorocebus\_sabaeus\_CM001966.2 23450404 23450922 HERVK\_5LTR -  
 Chlorocebus\_sabaeus\_CM001966.2 23452026 23453114 HERVK\_pol -  
 Chlorocebus\_sabaeus\_CM001966.2 23452976 23453945 HERVK\_pro -  
 Chlorocebus\_sabaeus\_CM001966.2 23454394 23454882 HERVK\_gag -  
 Chlorocebus\_sabaeus\_CM001966.2 23455361 23455875 HERVK\_3LTR -  
 Chlorocebus\_sabaeus\_CM001966.2 32753171 32753575 HERVHF\_5LTR -  
 Chlorocebus\_sabaeus\_CM001966.2 32754241 32755878 HERVHF\_pol -  
 Chlorocebus\_sabaeus\_CM001966.2 32755704 32756321 HERVHF\_pro -  
 Chlorocebus\_sabaeus\_CM001966.2 32758328 32758727 HERVHF\_3LTR -  
 Chlorocebus\_sabaeus\_CM001966.2 54000152 54000539 HERVK\_5LTR +  
 Chlorocebus\_sabaeus\_CM001966.2 54000794 54002067 HERVK\_gag +  
 Chlorocebus\_sabaeus\_CM001966.2 54002440 54002952 HERVK\_pro +

|                                         |          |          |             |   |
|-----------------------------------------|----------|----------|-------------|---|
| Chlorocebus_sabaeus_CM001966.2          | 54002847 | 54004789 | HERVK_pol   | + |
| Chlorocebus_sabaeus_CM001966.2          | 54005247 | 54005590 | HERVK_env   | + |
| Chlorocebus_sabaeus_CM001966.2          | 54005667 | 54006048 | HERVK_3LTR  | + |
| Chlorocebus_sabaeus_CM001967.1          | 9129471  | 9129795  | HERVHF_5LTR | - |
| Chlorocebus_sabaeus_CM001967.1          | 9130398  | 9132337  | HERVHF_pol  | - |
| Chlorocebus_sabaeus_CM001967.1          | 9132887  | 9134033  | HERVHF_gag  | - |
| Chlorocebus_sabaeus_CM001967.1          | 9134807  | 9135145  | HERVHF_3LTR | - |
| Chlorocebus_sabaeus_CM001970.2          | 2945325  | 2945719  | HERVHF_5LTR | - |
| Chlorocebus_sabaeus_CM001970.2          | 2946560  | 2948712  | HERVHF_pol  | - |
| Chlorocebus_sabaeus_CM001970.2          | 2948170  | 2948901  | HERVHF_pro  | - |
| Chlorocebus_sabaeus_CM001970.2          | 2949000  | 2949341  | HERVHF_gag  | - |
| Chlorocebus_sabaeus_CM001970.2          | 2950915  | 2951308  | HERVHF_3LTR | - |
| Chlorocebus_sabaeus_KE148142.1          | 17949    | 18373    | HERVHF_5LTR | + |
| Chlorocebus_sabaeus_KE148142.1          | 19666    | 20157    | HERVHF_gag  | + |
| Chlorocebus_sabaeus_KE148142.1          | 20520    | 21341    | HERVHF_pro  | + |
| Chlorocebus_sabaeus_KE148142.1          | 20805    | 22683    | HERVHF_pol  | + |
| Chlorocebus_sabaeus_KE148142.1          | 23709    | 24124    | HERVHF_3LTR | + |
| Colobus_angolensis_palliatus_KN979419.1 | 6617190  | 6617504  | HERVK_5LTR  | + |
| Colobus_angolensis_palliatus_KN979419.1 | 6618819  | 6619604  | HERVK_pro   | + |
| Colobus_angolensis_palliatus_KN979419.1 | 6619499  | 6620236  | HERVK_pol   | + |
| Colobus_angolensis_palliatus_KN979419.1 | 6621109  | 6621459  | HERVK_env   | + |
| Colobus_angolensis_palliatus_KN979419.1 | 6621564  | 6621872  | HERVK_3LTR  | + |
| Colobus_angolensis_palliatus_KN979619.1 | 5072265  | 5072679  | HERVHF_5LTR | + |
| Colobus_angolensis_palliatus_KN979619.1 | 5074730  | 5075146  | HERVHF_gag  | + |
| Colobus_angolensis_palliatus_KN979619.1 | 5075230  | 5076009  | HERVHF_pro  | + |
| Colobus_angolensis_palliatus_KN979619.1 | 5075341  | 5077256  | HERVHF_pol  | + |
| Colobus_angolensis_palliatus_KN979619.1 | 5077914  | 5078492  | HERVHF_env  | + |
| Colobus_angolensis_palliatus_KN979619.1 | 5078643  | 5079048  | HERVHF_3LTR | + |
| Colobus_angolensis_palliatus_KN979652.1 | 4988609  | 4988932  | HERVHF_5LTR | + |
| Colobus_angolensis_palliatus_KN979652.1 | 4990391  | 4990993  | HERVHF_gag  | + |
| Colobus_angolensis_palliatus_KN979652.1 | 4991030  | 4991488  | HERVHF_pro  | + |
| Colobus_angolensis_palliatus_KN979652.1 | 4991571  | 4993799  | HERVHF_pol  | + |
| Colobus_angolensis_palliatus_KN979652.1 | 4994771  | 4995163  | HERVHF_env  | + |
| Colobus_angolensis_palliatus_KN979652.1 | 4995408  | 4995734  | HERVHF_3LTR | + |
| Colobus_angolensis_palliatus_KN979885.1 | 7515557  | 7516011  | HERVHF_5LTR | - |
| Colobus_angolensis_palliatus_KN979885.1 | 7516435  | 7518248  | HERVHF_pol  | - |
| Colobus_angolensis_palliatus_KN979885.1 | 7521124  | 7521585  | HERVHF_3LTR | - |
| Colobus_angolensis_palliatus_KN979940.1 | 6231554  | 6231884  | HERVHF_5LTR | + |

|                                         |         |         |             |   |
|-----------------------------------------|---------|---------|-------------|---|
| Colobus_angolensis_palliatus_KN979940.1 | 6233662 | 6233985 | HERVHF_gag  | + |
| Colobus_angolensis_palliatus_KN979940.1 | 6234282 | 6234809 | HERVHF_pol  | + |
| Colobus_angolensis_palliatus_KN979940.1 | 6235195 | 6235557 | HERVHF_env  | + |
| Colobus_angolensis_palliatus_KN979940.1 | 6235807 | 6236139 | HERVHF_3LTR | + |
| Colobus_angolensis_palliatus_KN980051.1 | 8647365 | 8647775 | HERVHF_5LTR | + |
| Colobus_angolensis_palliatus_KN980051.1 | 8649262 | 8649585 | HERVHF_gag  | + |
| Colobus_angolensis_palliatus_KN980051.1 | 8649636 | 8650058 | HERVHF_pro  | + |
| Colobus_angolensis_palliatus_KN980051.1 | 8650069 | 8652691 | HERVHF_pol  | + |
| Colobus_angolensis_palliatus_KN980051.1 | 8652789 | 8653144 | HERVHF_env  | + |
| Colobus_angolensis_palliatus_KN980051.1 | 8653308 | 8653726 | HERVHF_3LTR | + |
| Colobus_angolensis_palliatus_KN980519.1 | 1997855 | 1998185 | HERVHF_5LTR | + |
| Colobus_angolensis_palliatus_KN980519.1 | 1999088 | 1999684 | HERVHF_pro  | + |
| Colobus_angolensis_palliatus_KN980519.1 | 1999594 | 2001072 | HERVHF_pol  | + |
| Colobus_angolensis_palliatus_KN980519.1 | 2002118 | 2002487 | HERVHF_env  | + |
| Colobus_angolensis_palliatus_KN980519.1 | 2002580 | 2002906 | HERVHF_3LTR | + |
| Colobus_angolensis_palliatus_KN980818.1 | 3164069 | 3164474 | HERVHF_5LTR | + |
| Colobus_angolensis_palliatus_KN980818.1 | 3165785 | 3166273 | HERVHF_gag  | + |
| Colobus_angolensis_palliatus_KN980818.1 | 3166775 | 3169125 | HERVHF_pol  | + |
| Colobus_angolensis_palliatus_KN980818.1 | 3169724 | 3170126 | HERVHF_3LTR | + |
| Colobus_angolensis_palliatus_KN980841.1 | 2205788 | 2206243 | HERVHF_5LTR | + |
| Colobus_angolensis_palliatus_KN980841.1 | 2208401 | 2210464 | HERVHF_pol  | + |
| Colobus_angolensis_palliatus_KN980841.1 | 2210874 | 2211310 | HERVHF_3LTR | + |
| Colobus_angolensis_palliatus_KN981104.1 | 2271492 | 2271892 | HERVHF_5LTR | - |
| Colobus_angolensis_palliatus_KN981104.1 | 2272103 | 2273362 | HERVHF_pol  | - |
| Colobus_angolensis_palliatus_KN981104.1 | 2275980 | 2276384 | HERVHF_3LTR | - |
| Colobus_angolensis_palliatus_KN981247.1 | 2898111 | 2898509 | HERVHF_5LTR | + |
| Colobus_angolensis_palliatus_KN981247.1 | 2899885 | 2900619 | HERVHF_gag  | + |
| Colobus_angolensis_palliatus_KN981247.1 | 2900637 | 2901284 | HERVHF_pro  | + |
| Colobus_angolensis_palliatus_KN981247.1 | 2900682 | 2902657 | HERVHF_pol  | + |
| Colobus_angolensis_palliatus_KN981247.1 | 2903193 | 2903587 | HERVHF_3LTR | + |

|                                         |         |         |                |   |
|-----------------------------------------|---------|---------|----------------|---|
| Colobus_angolensis_palliatus_KN981446.1 | 1416715 | 1417208 | HERVIPADP_5LTR | - |
| Colobus_angolensis_palliatus_KN981446.1 | 1417323 | 1417760 | HERVIPADP_env  | - |
| Colobus_angolensis_palliatus_KN981446.1 | 1419470 | 1422116 | HERVIPADP_pol  | - |
| Colobus_angolensis_palliatus_KN981446.1 | 1422859 | 1423260 | HERVIPADP_gag  | - |
| Colobus_angolensis_palliatus_KN981446.1 | 1424891 | 1425384 | HERVIPADP_3LTR | - |
| Colobus_angolensis_palliatus_KN981891.1 | 2834817 | 2835147 | HERVHF_5LTR    | + |
| Colobus_angolensis_palliatus_KN981891.1 | 2836507 | 2837156 | HERVHF_gag     | + |
| Colobus_angolensis_palliatus_KN981891.1 | 2837631 | 2838389 | HERVHF_pro     | + |
| Colobus_angolensis_palliatus_KN981891.1 | 2837763 | 2840116 | HERVHF_pol     | + |
| Colobus_angolensis_palliatus_KN981891.1 | 2840835 | 2841166 | HERVHF_3LTR    | + |
| Colobus_angolensis_palliatus_KN982682.1 | 419603  | 420002  | HERVHF_5LTR    | - |
| Colobus_angolensis_palliatus_KN982682.1 | 420649  | 421230  | HERVHF_pol     | - |
| Colobus_angolensis_palliatus_KN982682.1 | 420847  | 421647  | HERVHF_pro     | - |
| Colobus_angolensis_palliatus_KN982682.1 | 421844  | 422290  | HERVHF_gag     | - |
| Colobus_angolensis_palliatus_KN982682.1 | 423100  | 423506  | HERVHF_3LTR    | - |
| Colobus_angolensis_palliatus_KN983036.1 | 529720  | 530152  | HERVHF_5LTR    | + |
| Colobus_angolensis_palliatus_KN983036.1 | 531537  | 531839  | HERVHF_gag     | + |
| Colobus_angolensis_palliatus_KN983036.1 | 532002  | 532802  | HERVHF_pro     | + |
| Colobus_angolensis_palliatus_KN983036.1 | 532245  | 533730  | HERVHF_pol     | + |
| Colobus_angolensis_palliatus_KN983036.1 | 534817  | 535254  | HERVHF_3LTR    | + |
| Colobus_angolensis_palliatus_KN983046.1 | 1378365 | 1378773 | HERVHF_5LTR    | + |
| Colobus_angolensis_palliatus_KN983046.1 | 1380184 | 1380534 | HERVHF_gag     | + |
| Colobus_angolensis_palliatus_KN983046.1 | 1380683 | 1381459 | HERVHF_pro     | + |
| Colobus_angolensis_palliatus_KN983046.1 | 1380920 | 1383354 | HERVHF_pol     | + |
| Colobus_angolensis_palliatus_KN983046.1 | 1383800 | 1384220 | HERVHF_3LTR    | + |
| Colobus_angolensis_palliatus_KN984364.1 | 7370958 | 7371365 | HERVHF_5LTR    | - |
| Colobus_angolensis_palliatus_KN984364.1 | 7371847 | 7373816 | HERVHF_pol     | - |
| Colobus_angolensis_palliatus_KN984364.1 | 7374368 | 7374841 | HERVHF_gag     | - |
| Colobus_angolensis_palliatus_KN984364.1 | 7376188 | 7376587 | HERVHF_3LTR    | - |

|                                         |         |         |                |   |
|-----------------------------------------|---------|---------|----------------|---|
| Colobus_angolensis_palliatus_KN984673.1 | 3655456 | 3655820 | HERVHF_5LTR    | - |
| Colobus_angolensis_palliatus_KN984673.1 | 3657023 | 3658580 | HERVHF_pol     | - |
| Colobus_angolensis_palliatus_KN984673.1 | 3658185 | 3658811 | HERVHF_pro     | - |
| Colobus_angolensis_palliatus_KN984673.1 | 3659006 | 3659326 | HERVHF_gag     | - |
| Colobus_angolensis_palliatus_KN984673.1 | 3661192 | 3661559 | HERVHF_3LTR    | - |
| Colobus_angolensis_palliatus_KN985382.1 | 527     | 959     | HERVK_5LTR     | - |
| Colobus_angolensis_palliatus_KN985382.1 | 2471    | 3920    | HERVK_pol      | - |
| Colobus_angolensis_palliatus_KN985382.1 | 3911    | 4834    | HERVK_pro      | - |
| Colobus_angolensis_palliatus_KN985382.1 | 6323    | 6756    | HERVK_3LTR     | - |
| Colobus_angolensis_palliatus_KN985685.1 | 300794  | 301251  | HERVHF_5LTR    | + |
| Colobus_angolensis_palliatus_KN985685.1 | 303799  | 304380  | HERVHF_pro     | + |
| Colobus_angolensis_palliatus_KN985685.1 | 303856  | 305531  | HERVHF_pol     | + |
| Colobus_angolensis_palliatus_KN985685.1 | 306341  | 306796  | HERVHF_3LTR    | + |
| Colobus_angolensis_palliatus_KN985700.1 | 85869   | 86282   | HERVHF_5LTR    | - |
| Colobus_angolensis_palliatus_KN985700.1 | 86982   | 89410   | HERVHF_pol     | - |
| Colobus_angolensis_palliatus_KN985700.1 | 88772   | 89476   | HERVHF_pro     | - |
| Colobus_angolensis_palliatus_KN985700.1 | 89715   | 90179   | HERVHF_gag     | - |
| Colobus_angolensis_palliatus_KN985700.1 | 91492   | 91905   | HERVHF_3LTR    | - |
| Colobus_angolensis_palliatus_KN985711.1 | 8836491 | 8836926 | HERVHF_5LTR    | + |
| Colobus_angolensis_palliatus_KN985711.1 | 8838437 | 8838796 | HERVHF_gag     | + |
| Colobus_angolensis_palliatus_KN985711.1 | 8839170 | 8841578 | HERVHF_pol     | + |
| Colobus_angolensis_palliatus_KN985711.1 | 8842039 | 8842472 | HERVHF_3LTR    | + |
| Colobus_angolensis_palliatus_KN985737.1 | 11540   | 11890   | HERVIPADP_5LTR | - |
| Colobus_angolensis_palliatus_KN985737.1 | 12172   | 12474   | HERVIPADP_env  | - |
| Colobus_angolensis_palliatus_KN985737.1 | 16113   | 19009   | HERVIPADP_pol  | - |
| Colobus_angolensis_palliatus_KN985737.1 | 20421   | 20999   | HERVIPADP_gag  | - |
| Colobus_angolensis_palliatus_KN985737.1 | 22153   | 22509   | HERVIPADP_3LTR | - |
| Colobus_angolensis_palliatus_KN985934.1 | 384429  | 384788  | HERVHF_5LTR    | + |
| Colobus_angolensis_palliatus_KN985934.1 | 387291  | 389066  | HERVHF_pol     | + |
| Colobus_angolensis_palliatus_KN985934.1 | 389686  | 391262  | HERVHF_env     | + |



Colobus\_angolensis\_palliatus\_KN985934.1 391552 391932 HERVHF\_3LTR +

Colobus\_guereza\_ContigUN 2254126 2254435 HERVHF\_5LTR +  
Colobus\_guereza\_ContigUN 2256065 2256535 HERVHF\_gag +  
Colobus\_guereza\_ContigUN 2256717 2257442 HERVHF\_pro +  
Colobus\_guereza\_ContigUN 2256927 2258264 HERVHF\_pol +  
Colobus\_guereza\_ContigUN 2258836 2259150 HERVHF\_3LTR +  
Colobus\_guereza\_LG01 177203219 177203552 HERVHF\_5LTR +  
Colobus\_guereza\_LG01 177205725 177206522 HERVHF\_pro +  
Colobus\_guereza\_LG01 177205959 177208337 HERVHF\_pol +  
Colobus\_guereza\_LG01 177209387 177209730 HERVHF\_3LTR +  
Colobus\_guereza\_LG02 22064195 22064945 HSERVIII\_5LTR +  
Colobus\_guereza\_LG02 22066858 22067553 HSERVIII\_pol +  
Colobus\_guereza\_LG02 22072181 22072939 HSERVIII\_3LTR +  
Colobus\_guereza\_LG03 168855231 168855631 HERVHF\_5LTR -  
Colobus\_guereza\_LG03 168856221 168858460 HERVHF\_pol -  
Colobus\_guereza\_LG03 168860770 168861166 HERVHF\_3LTR -  
Colobus\_guereza\_LG04 24358834 24359270 HERVHF\_5LTR -  
Colobus\_guereza\_LG04 24359971 24362043 HERVHF\_pol -  
Colobus\_guereza\_LG04 24364190 24364645 HERVHF\_3LTR -  
Colobus\_guereza\_LG04 30649087 30649397 Unknown\_HERV\_5LTR -  
Colobus\_guereza\_LG04 30650044 30656434 Unknown\_HERV\_pol -  
Colobus\_guereza\_LG04 30660744 30661078 Unknown\_HERV\_3LTR -  
Colobus\_guereza\_LG04 45132011 45132470 HERVHF\_5LTR -  
Colobus\_guereza\_LG04 45132899 45134746 HERVHF\_pol -  
Colobus\_guereza\_LG04 45134695 45135210 HERVHF\_pro -  
Colobus\_guereza\_LG04 45137174 45137639 HERVHF\_3LTR -  
Colobus\_guereza\_LG04 141627966 141628375 HERVIPADP\_5LTR +  
Colobus\_guereza\_LG04 141630830 141633954 HERVIPADP\_pol +  
Colobus\_guereza\_LG04 141636129 141636626 HERVIPADP\_env +  
Colobus\_guereza\_LG04 141636866 141637268 HERVIPADP\_3LTR +  
Colobus\_guereza\_LG07 30551128 30551449 HERVHF\_5LTR -  
Colobus\_guereza\_LG07 30552142 30554356 HERVHF\_pol -  
Colobus\_guereza\_LG07 30554165 30554647 HERVHF\_pro -  
Colobus\_guereza\_LG07 30556713 30557020 HERVHF\_3LTR -  
Colobus\_guereza\_LG07 58247766 58248224 HERVHF\_5LTR -  
Colobus\_guereza\_LG07 58250624 58252550 HERVHF\_pol -  
Colobus\_guereza\_LG07 58251915 58252691 HERVHF\_pro -  
Colobus\_guereza\_LG07 58255186 58255572 HERVHF\_gag -  
Colobus\_guereza\_LG07 58256922 58257379 HERVHF\_3LTR -  
Colobus\_guereza\_LG07 65917767 65918754 HSERVIII\_5LTR +  
Colobus\_guereza\_LG07 65919280 65919747 HSERVIII\_pol +  
Colobus\_guereza\_LG07 65920215 65921207 HSERVIII\_3LTR +  
Colobus\_guereza\_LG07 94959881 94960224 HERVHF\_5LTR +

|                      |           |           |                   |   |
|----------------------|-----------|-----------|-------------------|---|
| Colobus_guereza_LG07 | 94966045  | 94966392  | HERVHF_gag        | + |
| Colobus_guereza_LG07 | 94966634  | 94967413  | HERVHF_pro        | + |
| Colobus_guereza_LG07 | 94966871  | 94969114  | HERVHF_pol        | + |
| Colobus_guereza_LG07 | 94969189  | 94969527  | HERVHF_3LTR       | + |
| Colobus_guereza_LG09 | 93831066  | 93831523  | Unknown_HERV_5LTR | + |
| Colobus_guereza_LG09 | 93833573  | 93834424  | Unknown_HERV_pro  | + |
| Colobus_guereza_LG09 | 93833765  | 93836059  | Unknown_HERV_pol  | + |
| Colobus_guereza_LG09 | 93836584  | 93837039  | Unknown_HERV_3LTR | + |
| Colobus_guereza_LG09 | 100538305 | 100538710 | HERVHF_5LTR       | - |
| Colobus_guereza_LG09 | 100538863 | 100539441 | HERVHF_env        | - |
| Colobus_guereza_LG09 | 100540051 | 100541983 | HERVHF_pol        | - |
| Colobus_guereza_LG09 | 100541384 | 100542115 | HERVHF_pro        | - |
| Colobus_guereza_LG09 | 100542630 | 100543043 | HERVHF_gag        | - |
| Colobus_guereza_LG09 | 100544351 | 100544765 | HERVHF_3LTR       | - |
| Colobus_guereza_LG11 | 129720258 | 129720656 | HERVHF_5LTR       | - |
| Colobus_guereza_LG11 | 129721303 | 129722076 | HERVHF_pol        | - |
| Colobus_guereza_LG11 | 129721477 | 129722100 | HERVHF_pro        | - |
| Colobus_guereza_LG11 | 129723751 | 129724151 | HERVHF_3LTR       | - |
| Colobus_guereza_LG12 | 54427286  | 54427681  | HERVHF_5LTR       | + |
| Colobus_guereza_LG12 | 54429639  | 54430109  | HERVHF_pro        | + |
| Colobus_guereza_LG12 | 54430598  | 54431867  | HERVHF_pol        | + |
| Colobus_guereza_LG12 | 54432776  | 54433154  | HERVHF_3LTR       | + |
| Colobus_guereza_LG13 | 102125204 | 102125680 | HERVHF_5LTR       | - |
| Colobus_guereza_LG13 | 102126690 | 102128557 | HERVHF_pol        | - |
| Colobus_guereza_LG13 | 102127991 | 102128800 | HERVHF_pro        | - |
| Colobus_guereza_LG13 | 102128906 | 102129268 | HERVHF_gag        | - |
| Colobus_guereza_LG13 | 102130776 | 102131249 | HERVHF_3LTR       | - |
| Colobus_guereza_LG15 | 70287811  | 70288435  | HERVHF_5LTR       | - |
| Colobus_guereza_LG15 | 70288628  | 70289463  | HERVHF_pol        | - |
| Colobus_guereza_LG15 | 70290289  | 70290921  | HERVHF_3LTR       | - |
| Colobus_guereza_LG16 | 81677337  | 81677670  | HUERSP_5LTR       | - |
| Colobus_guereza_LG16 | 81683001  | 81683659  | HUERSP_pol        | - |
| Colobus_guereza_LG16 | 81683336  | 81683644  | HUERSP_pro        | - |
| Colobus_guereza_LG16 | 81684356  | 81685012  | HUERSP_gag        | - |
| Colobus_guereza_LG16 | 81687006  | 81687327  | HUERSP_3LTR       | - |
| Colobus_guereza_LG17 | 12937785  | 12938129  | HERVHF_5LTR       | - |
| Colobus_guereza_LG17 | 12938795  | 12940689  | HERVHF_pol        | - |
| Colobus_guereza_LG17 | 12940141  | 12940920  | HERVHF_pro        | - |
| Colobus_guereza_LG17 | 12941009  | 12941314  | HERVHF_gag        | - |
| Colobus_guereza_LG17 | 12943128  | 12943471  | HERVHF_3LTR       | - |
| Colobus_guereza_LG18 | 36587215  | 36587664  | HERVIPADP_5LTR    | + |
| Colobus_guereza_LG18 | 36589854  | 36590216  | HERVIPADP_gag     | + |
| Colobus_guereza_LG18 | 36590604  | 36594237  | HERVIPADP_pol     | + |
| Colobus_guereza_LG18 | 36595735  | 36596187  | HERVIPADP_env     | + |

|                                           |          |          |                   |   |
|-------------------------------------------|----------|----------|-------------------|---|
| Colobus_guereza_LG18                      | 36596275 | 36596718 | HERVIPADP_3LTR    | + |
| Colobus_guereza_LG18                      | 92302394 | 92302849 | HERVHF_5LTR       | - |
| Colobus_guereza_LG18                      | 92303466 | 92305328 | HERVHF_pol        | - |
| Colobus_guereza_LG18                      | 92305619 | 92305942 | HERVHF_gag        | - |
| Colobus_guereza_LG18                      | 92307651 | 92308105 | HERVHF_3LTR       | - |
| Colobus_guereza_LG19                      | 42896800 | 42897109 | HERVHF_5LTR       | - |
| Colobus_guereza_LG19                      | 42900157 | 42906591 | HERVHF_pol        | - |
| Colobus_guereza_LG19                      | 42906118 | 42906627 | HERVHF_pro        | - |
| Colobus_guereza_LG19                      | 42911195 | 42911499 | HERVHF_3LTR       | - |
| Daubentonia_madagascariensis.fasta_ctg1   | 19222278 | 19222597 | HERVHF_5LTR       | - |
| Daubentonia_madagascariensis.fasta_ctg1   | 19224528 | 19227600 | HERVHF_pol        | - |
| Daubentonia_madagascariensis.fasta_ctg1   | 19228205 | 19228699 | HERVHF_gag        | - |
| Daubentonia_madagascariensis.fasta_ctg1   | 19230102 | 19230412 | HERVHF_3LTR       | - |
| Daubentonia_madagascariensis.fasta_ctg12  | 989558   | 989887   | HSERVIII_5LTR     | + |
| Daubentonia_madagascariensis.fasta_ctg12  | 991660   | 994038   | HSERVIII_pol      | + |
| Daubentonia_madagascariensis.fasta_ctg12  | 995497   | 995824   | HSERVIII_3LTR     | + |
| Daubentonia_madagascariensis.fasta_ctg128 | 2000620  | 2001037  | Unknown_HERV_5LTR | - |
| Daubentonia_madagascariensis.fasta_ctg128 | 2004010  | 2006046  | Unknown_HERV_pol  | - |
| Daubentonia_madagascariensis.fasta_ctg128 | 2007572  | 2007990  | Unknown_HERV_3LTR | - |
| Erythrocebus_patas_Contig1                | 31483142 | 31483463 | HERVHF_5LTR       | - |
| Erythrocebus_patas_Contig1                | 31483912 | 31485901 | HERVHF_pol        | - |
| Erythrocebus_patas_Contig1                | 31488184 | 31488510 | HERVHF_3LTR       | - |
| Erythrocebus_patas_Contig10               | 24937773 | 24938197 | HERVHF_5LTR       | - |
| Erythrocebus_patas_Contig10               | 24938628 | 24940482 | HERVHF_pol        | - |
| Erythrocebus_patas_Contig10               | 24940174 | 24940950 | HERVHF_pro        | - |
| Erythrocebus_patas_Contig10               | 24941086 | 24941403 | HERVHF_gag        | - |
| Erythrocebus_patas_Contig10               | 24942804 | 24943224 | HERVHF_3LTR       | - |
| Erythrocebus_patas_Contig10               | 33877933 | 33878346 | HERVHF_5LTR       | + |
| Erythrocebus_patas_Contig10               | 33880376 | 33881125 | HERVHF_pro        | + |
| Erythrocebus_patas_Contig10               | 33880835 | 33882533 | HERVHF_pol        | + |
| Erythrocebus_patas_Contig10               | 33883048 | 33883460 | HERVHF_3LTR       | + |
| Erythrocebus_patas_Contig104              | 3226968  | 3227419  | HERVK_5LTR        | - |
| Erythrocebus_patas_Contig104              | 3228465  | 3230244  | HERVK_pol         | - |
| Erythrocebus_patas_Contig104              | 3230139  | 3231047  | HERVK_pro         | - |
| Erythrocebus_patas_Contig104              | 3230493  | 3231212  | HERVK_gag         | - |
| Erythrocebus_patas_Contig104              | 3232816  | 3233264  | HERVK_3LTR        | - |
| Erythrocebus_patas_Contig11               | 467636   | 468109   | HERVK_5LTR        | + |

|                                     |          |          |             |   |
|-------------------------------------|----------|----------|-------------|---|
| Erythrocebus_patas_Contig11         | 468919   | 469850   | HERVK_pro   | + |
| Erythrocebus_patas_Contig11         | 469682   | 470912   | HERVK_pol   | + |
| Erythrocebus_patas_Contig11         | 471880   | 472352   | HERVK_3LTR  | + |
| Erythrocebus_patas_Contig11         | 5757035  | 5757348  | HERVHF_5LTR | + |
| Erythrocebus_patas_Contig11         | 5759169  | 5759600  | HERVHF_pro  | + |
| Erythrocebus_patas_Contig11         | 5759642  | 5762337  | HERVHF_pol  | + |
| Erythrocebus_patas_Contig11         | 5762870  | 5763186  | HERVHF_3LTR | + |
| Erythrocebus_patas_Contig11         | 21739397 | 21739786 | HERVHF_5LTR | + |
| Erythrocebus_patas_Contig11         | 21741406 | 21741891 | HERVHF_gag  | + |
| Erythrocebus_patas_Contig11         | 21742079 | 21742456 | HERVHF_pro  | + |
| Erythrocebus_patas_Contig11         | 21742347 | 21745382 | HERVHF_pol  | + |
| Erythrocebus_patas_Contig11         | 21745706 | 21746080 | HERVHF_env  | + |
| Erythrocebus_patas_Contig11         | 21746315 | 21746699 | HERVHF_3LTR | + |
| Erythrocebus_patas_Contig1156203133 | 6203584  |          | HERVHF_5LTR | - |
| Erythrocebus_patas_Contig1156204647 | 6206048  |          | HERVHF_pol  | - |
| Erythrocebus_patas_Contig1156206358 | 6206699  |          | HERVHF_gag  | - |
| Erythrocebus_patas_Contig1156208331 | 6208779  |          | HERVHF_3LTR | - |
| Erythrocebus_patas_Contig120        | 2410720  | 2411221  | HERVHF_5LTR | + |
| Erythrocebus_patas_Contig120        | 2413067  | 2413858  | HERVHF_pro  | + |
| Erythrocebus_patas_Contig120        | 2413553  | 2414637  | HERVHF_pol  | + |
| Erythrocebus_patas_Contig120        | 2414934  | 2415439  | HERVHF_3LTR | + |
| Erythrocebus_patas_Contig121        | 1503711  | 1504070  | HERVHF_5LTR | - |
| Erythrocebus_patas_Contig121        | 1504214  | 1504516  | HERVHF_env  | - |
| Erythrocebus_patas_Contig121        | 1504673  | 1506478  | HERVHF_pol  | - |
| Erythrocebus_patas_Contig121        | 1506498  | 1506923  | HERVHF_pro  | - |
| Erythrocebus_patas_Contig121        | 1509014  | 1509368  | HERVHF_3LTR | - |
| Erythrocebus_patas_Contig13         | 29365738 | 29366082 | HERVHF_5LTR | - |
| Erythrocebus_patas_Contig13         | 29366388 | 29367417 | HERVHF_env  | - |
| Erythrocebus_patas_Contig13         | 29369040 | 29371403 | HERVHF_pol  | - |
| Erythrocebus_patas_Contig13         | 29370816 | 29371532 | HERVHF_pro  | - |
| Erythrocebus_patas_Contig13         | 29371992 | 29372414 | HERVHF_gag  | - |
| Erythrocebus_patas_Contig13         | 29373994 | 29374347 | HERVHF_3LTR | - |
| Erythrocebus_patas_Contig138        | 4130673  | 4131033  | HERVHF_5LTR | + |
| Erythrocebus_patas_Contig138        | 4133322  | 4135150  | HERVHF_pol  | + |
| Erythrocebus_patas_Contig138        | 4135873  | 4136235  | HERVHF_3LTR | + |
| Erythrocebus_patas_Contig14         | 9175294  | 9175625  | HERVHF_5LTR | - |
| Erythrocebus_patas_Contig14         | 9175913  | 9176251  | HERVHF_env  | - |
| Erythrocebus_patas_Contig14         | 9176559  | 9177263  | HERVHF_pol  | - |
| Erythrocebus_patas_Contig14         | 9179547  | 9179868  | HERVHF_3LTR | - |
| Erythrocebus_patas_Contig159        | 2942345  | 2942716  | HERVHF_5LTR | + |
| Erythrocebus_patas_Contig159        | 2943407  | 2944087  | HERVHF_pro  | + |
| Erythrocebus_patas_Contig159        | 2943680  | 2945998  | HERVHF_pol  | + |
| Erythrocebus_patas_Contig159        | 2946874  | 2947237  | HERVHF_3LTR | + |
| Erythrocebus_patas_Contig189        | 15905    | 16305    | HERVHF_5LTR | + |

|                              |          |          |                |   |
|------------------------------|----------|----------|----------------|---|
| Erythrocebus_patas_Contig189 | 18963    | 21683    | HERVHF_pol     | + |
| Erythrocebus_patas_Contig189 | 22349    | 22801    | HERVHF_env     | + |
| Erythrocebus_patas_Contig189 | 23009    | 23410    | HERVHF_3LTR    | + |
| Erythrocebus_patas_Contig19  | 30085947 | 30086348 | HERVHF_5LTR    | - |
| Erythrocebus_patas_Contig19  | 30086954 | 30089358 | HERVHF_pol     | - |
| Erythrocebus_patas_Contig19  | 30088816 | 30089658 | HERVHF_pro     | - |
| Erythrocebus_patas_Contig19  | 30089865 | 30090218 | HERVHF_gag     | - |
| Erythrocebus_patas_Contig19  | 30091465 | 30091857 | HERVHF_3LTR    | - |
| Erythrocebus_patas_Contig196 | 1670592  | 1671102  | HERVK_5LTR     | - |
| Erythrocebus_patas_Contig196 | 1672029  | 1674465  | HERVK_pol      | - |
| Erythrocebus_patas_Contig196 | 1674333  | 1675283  | HERVK_pro      | - |
| Erythrocebus_patas_Contig196 | 1675229  | 1676279  | HERVK_gag      | - |
| Erythrocebus_patas_Contig196 | 1676701  | 1677214  | HERVK_3LTR     | - |
| Erythrocebus_patas_Contig2   | 24330326 | 24330759 | HERVHF_5LTR    | + |
| Erythrocebus_patas_Contig2   | 24331588 | 24334342 | HERVHF_gag     | + |
| Erythrocebus_patas_Contig2   | 24334630 | 24335235 | HERVHF_pro     | + |
| Erythrocebus_patas_Contig2   | 24334660 | 24337124 | HERVHF_pol     | + |
| Erythrocebus_patas_Contig2   | 24337663 | 24338098 | HERVHF_3LTR    | + |
| Erythrocebus_patas_Contig224 | 384977   | 385289   | HERVHF_5LTR    | + |
| Erythrocebus_patas_Contig224 | 390067   | 390732   | HERVHF_gag     | + |
| Erythrocebus_patas_Contig224 | 391222   | 393534   | HERVHF_pol     | + |
| Erythrocebus_patas_Contig224 | 396242   | 396550   | HERVHF_3LTR    | + |
| Erythrocebus_patas_Contig27  | 12912397 | 12912908 | HERVK_5LTR     | + |
| Erythrocebus_patas_Contig27  | 12913888 | 12914664 | HERVK_gag      | + |
| Erythrocebus_patas_Contig27  | 12914273 | 12914986 | HERVK_pro      | + |
| Erythrocebus_patas_Contig27  | 12915033 | 12915815 | HERVK_pol      | + |
| Erythrocebus_patas_Contig27  | 12917812 | 12918177 | HERVK_env      | + |
| Erythrocebus_patas_Contig27  | 12918179 | 12918676 | HERVK_3LTR     | + |
| Erythrocebus_patas_Contig3   | 9282418  | 9282918  | HERVIPADP_5LTR | + |
| Erythrocebus_patas_Contig3   | 9283173  | 9283544  | HERVIPADP_gag  | + |
| Erythrocebus_patas_Contig3   | 9284120  | 9284605  | HERVIPADP_pol  | + |
| Erythrocebus_patas_Contig3   | 9294544  | 9295034  | HERVIPADP_3LTR | + |
| Erythrocebus_patas_Contig33  | 4709180  | 4709847  | HERVHF_5LTR    | + |
| Erythrocebus_patas_Contig33  | 4711502  | 4711930  | HERVHF_pro     | + |
| Erythrocebus_patas_Contig33  | 4711965  | 4714272  | HERVHF_pol     | + |
| Erythrocebus_patas_Contig33  | 4717907  | 4718580  | HERVHF_3LTR    | + |
| Erythrocebus_patas_Contig356 | 11195    | 11694    | HERVK_5LTR     | + |
| Erythrocebus_patas_Contig356 | 12496    | 13416    | HERVK_pro      | + |
| Erythrocebus_patas_Contig356 | 13326    | 15223    | HERVK_pol      | + |
| Erythrocebus_patas_Contig356 | 15644    | 16051    | HERVK_env      | + |
| Erythrocebus_patas_Contig356 | 16128    | 16625    | HERVK_3LTR     | + |
| Erythrocebus_patas_Contig363 | 96294    | 96702    | HERVHF_5LTR    | - |
| Erythrocebus_patas_Contig363 | 96868    | 97230    | HERVHF_env     | - |
| Erythrocebus_patas_Contig363 | 99436    | 100182   | HERVHF_pol     | - |

|                              |          |          |             |   |
|------------------------------|----------|----------|-------------|---|
| Erythrocebus_patas_Contig363 | 99598    | 100296   | HERVHF_pro  | - |
| Erythrocebus_patas_Contig363 | 100419   | 100754   | HERVHF_gag  | - |
| Erythrocebus_patas_Contig363 | 102191   | 102608   | HERVHF_3LTR | - |
| Erythrocebus_patas_Contig39  | 5603570  | 5603997  | HERVHF_5LTR | - |
| Erythrocebus_patas_Contig39  | 5604539  | 5606884  | HERVHF_pol  | - |
| Erythrocebus_patas_Contig39  | 5609152  | 5609588  | HERVHF_3LTR | - |
| Erythrocebus_patas_Contig4   | 9194026  | 9194430  | HERVHF_5LTR | - |
| Erythrocebus_patas_Contig4   | 9194958  | 9196701  | HERVHF_pol  | - |
| Erythrocebus_patas_Contig4   | 9196701  | 9197138  | HERVHF_pro  | - |
| Erythrocebus_patas_Contig4   | 9199167  | 9199565  | HERVHF_3LTR | - |
| Erythrocebus_patas_Contig4   | 39357295 | 39357718 | HERVHF_5LTR | - |
| Erythrocebus_patas_Contig4   | 39357930 | 39358324 | HERVHF_env  | - |
| Erythrocebus_patas_Contig4   | 39359321 | 39361155 | HERVHF_pol  | - |
| Erythrocebus_patas_Contig4   | 39360844 | 39361662 | HERVHF_pro  | - |
| Erythrocebus_patas_Contig4   | 39362019 | 39362477 | HERVHF_gag  | - |
| Erythrocebus_patas_Contig4   | 39363733 | 39364155 | HERVHF_3LTR | - |
| Erythrocebus_patas_Contig40  | 8027211  | 8027590  | HERVHF_5LTR | - |
| Erythrocebus_patas_Contig40  | 8028132  | 8030395  | HERVHF_pol  | - |
| Erythrocebus_patas_Contig40  | 8030119  | 8030595  | HERVHF_pro  | - |
| Erythrocebus_patas_Contig40  | 8032399  | 8032777  | HERVHF_3LTR | - |
| Erythrocebus_patas_Contig45  | 12422394 | 12422883 | HERVK_5LTR  | + |
| Erythrocebus_patas_Contig45  | 12424319 | 12425275 | HERVK_pro   | + |
| Erythrocebus_patas_Contig45  | 12425131 | 12426781 | HERVK_pol   | + |
| Erythrocebus_patas_Contig45  | 12427573 | 12427905 | HERVK_env   | + |
| Erythrocebus_patas_Contig45  | 12427984 | 12428474 | HERVK_3LTR  | + |
| Erythrocebus_patas_Contig456 | 276188   | 276540   | HERVHF_5LTR | - |
| Erythrocebus_patas_Contig456 | 277137   | 279348   | HERVHF_pol  | - |
| Erythrocebus_patas_Contig456 | 279782   | 280138   | HERVHF_gag  | - |
| Erythrocebus_patas_Contig456 | 281583   | 281941   | HERVHF_3LTR | - |
| Erythrocebus_patas_Contig46  | 2951790  | 2952140  | HERVHF_5LTR | + |
| Erythrocebus_patas_Contig46  | 2954772  | 2956398  | HERVHF_pol  | + |
| Erythrocebus_patas_Contig46  | 2957169  | 2957528  | HERVHF_3LTR | + |
| Erythrocebus_patas_Contig47  | 11341387 | 11341696 | HERVHF_5LTR | - |
| Erythrocebus_patas_Contig47  | 11341983 | 11342348 | HERVHF_env  | - |
| Erythrocebus_patas_Contig47  | 11343483 | 11345219 | HERVHF_pol  | - |
| Erythrocebus_patas_Contig47  | 11344614 | 11345372 | HERVHF_pro  | - |
| Erythrocebus_patas_Contig47  | 11345527 | 11345862 | HERVHF_gag  | - |
| Erythrocebus_patas_Contig47  | 11346133 | 11346436 | HERVHF_3LTR | - |
| Erythrocebus_patas_Contig49  | 14668064 | 14668383 | HERVHF_5LTR | - |
| Erythrocebus_patas_Contig49  | 14668560 | 14669152 | HERVHF_env  | - |
| Erythrocebus_patas_Contig49  | 14671446 | 14673707 | HERVHF_pol  | - |
| Erythrocebus_patas_Contig49  | 14676052 | 14676429 | HERVHF_pro  | - |
| Erythrocebus_patas_Contig49  | 14676556 | 14677131 | HERVHF_gag  | - |
| Erythrocebus_patas_Contig49  | 14678718 | 14679033 | HERVHF_3LTR | - |

|                             |          |          |               |   |
|-----------------------------|----------|----------|---------------|---|
| Erythrocebus_patas_Contig5  | 37534626 | 37535079 | HERVHF_5LTR   | - |
| Erythrocebus_patas_Contig5  | 37535760 | 37537398 | HERVHF_pol    | - |
| Erythrocebus_patas_Contig5  | 37537067 | 37537861 | HERVHF_pro    | - |
| Erythrocebus_patas_Contig5  | 37539912 | 37540374 | HERVHF_3LTR   | - |
| Erythrocebus_patas_Contig5  | 45771813 | 45772197 | HERVHF_5LTR   | - |
| Erythrocebus_patas_Contig5  | 45773092 | 45774583 | HERVHF_pol    | - |
| Erythrocebus_patas_Contig5  | 45774350 | 45774979 | HERVHF_pro    | - |
| Erythrocebus_patas_Contig5  | 45777384 | 45777762 | HERVHF_3LTR   | - |
| Erythrocebus_patas_Contig50 | 12223567 | 12223881 | HUERSP_5LTR   | - |
| Erythrocebus_patas_Contig50 | 12228019 | 12230913 | HUERSP_pol    | - |
| Erythrocebus_patas_Contig50 | 12231268 | 12231624 | HUERSP_gag    | - |
| Erythrocebus_patas_Contig50 | 12233936 | 12234251 | HUERSP_3LTR   | - |
| Erythrocebus_patas_Contig52 | 11423773 | 11424762 | HSERVIII_5LTR | + |
| Erythrocebus_patas_Contig52 | 11425608 | 11425967 | HSERVIII_pol  | + |
| Erythrocebus_patas_Contig52 | 11426766 | 11427755 | HSERVIII_3LTR | + |
| Erythrocebus_patas_Contig55 | 519149   | 519601   | HERVHF_5LTR   | + |
| Erythrocebus_patas_Contig55 | 521086   | 521454   | HERVHF_gag    | + |
| Erythrocebus_patas_Contig55 | 521224   | 522368   | HERVHF_pro    | + |
| Erythrocebus_patas_Contig55 | 521832   | 523669   | HERVHF_pol    | + |
| Erythrocebus_patas_Contig55 | 524269   | 524716   | HERVHF_3LTR   | + |
| Erythrocebus_patas_Contig58 | 12503297 | 12503729 | HERVHF_5LTR   | + |
| Erythrocebus_patas_Contig58 | 12505322 | 12505624 | HERVHF_gag    | + |
| Erythrocebus_patas_Contig58 | 12506322 | 12508210 | HERVHF_pol    | + |
| Erythrocebus_patas_Contig58 | 12509327 | 12510463 | HERVHF_env    | + |
| Erythrocebus_patas_Contig58 | 12510682 | 12511118 | HERVHF_3LTR   | + |
| Erythrocebus_patas_Contig6  | 34901948 | 34902459 | HERVK_5LTR    | - |
| Erythrocebus_patas_Contig6  | 34902538 | 34903110 | HERVK_env     | - |
| Erythrocebus_patas_Contig6  | 34903322 | 34904752 | HERVK_pol     | - |
| Erythrocebus_patas_Contig6  | 34904500 | 34905268 | HERVK_pro     | - |
| Erythrocebus_patas_Contig6  | 34905390 | 34906040 | HERVK_gag     | - |
| Erythrocebus_patas_Contig6  | 34906801 | 34907321 | HERVK_3LTR    | - |
| Erythrocebus_patas_Contig6  | 44812281 | 44812648 | HERVK_5LTR    | + |
| Erythrocebus_patas_Contig6  | 44813759 | 44814451 | HERVK_pro     | + |
| Erythrocebus_patas_Contig6  | 44814352 | 44815418 | HERVK_pol     | + |
| Erythrocebus_patas_Contig6  | 44816539 | 44817075 | HERVK_env     | + |
| Erythrocebus_patas_Contig6  | 44817310 | 44817676 | HERVK_3LTR    | + |
| Erythrocebus_patas_Contig67 | 11334371 | 11334746 | HERVHF_5LTR   | + |
| Erythrocebus_patas_Contig67 | 11337194 | 11338958 | HERVHF_pol    | + |
| Erythrocebus_patas_Contig67 | 11339626 | 11340000 | HERVHF_3LTR   | + |
| Erythrocebus_patas_Contig7  | 902955   | 903335   | HERVHF_5LTR   | - |
| Erythrocebus_patas_Contig7  | 903546   | 903938   | HERVHF_env    | - |
| Erythrocebus_patas_Contig7  | 904943   | 906647   | HERVHF_pol    | - |
| Erythrocebus_patas_Contig7  | 907642   | 908019   | HERVHF_3LTR   | - |
| Erythrocebus_patas_Contig73 | 790714   | 791166   | HERVHF_5LTR   | + |

|                                                |          |             |               |   |  |
|------------------------------------------------|----------|-------------|---------------|---|--|
| Erythrocebus_patas_Contig73                    | 792830   | 793153      | HERVHF_gag    | + |  |
| Erythrocebus_patas_Contig73                    | 793342   | 793818      | HERVHF_pro    | + |  |
| Erythrocebus_patas_Contig73                    | 793567   | 795004      | HERVHF_pol    | + |  |
| Erythrocebus_patas_Contig73                    | 795317   | 795802      | HERVHF_env    | + |  |
| Erythrocebus_patas_Contig73                    | 795912   | 796370      | HERVHF_3LTR   | + |  |
| Erythrocebus_patas_Contig90                    | 8519320  | 8519891     | HSERVIII_5LTR | + |  |
| Erythrocebus_patas_Contig90                    | 8520682  | 8521239     | HSERVIII_pol  | + |  |
| Erythrocebus_patas_Contig90                    | 8521773  | 8522350     | HSERVIII_3LTR | + |  |
| Galago_moholi_ctg1909                          | 396175   | 396571      | HERVW9_5LTR   | + |  |
| Galago_moholi_ctg1909                          | 398387   | 399049      | HERVW9_gag    | + |  |
| Galago_moholi_ctg1909                          | 399346   | 400491      | HERVW9_pro    | + |  |
| Galago_moholi_ctg1909                          | 400213   | 402310      | HERVW9_pol    | + |  |
| Galago_moholi_ctg1909                          | 403323   | 403723      | HERVW9_3LTR   | + |  |
| Galago_moholi_ctg3130                          | 45350    | 46092       | HERVHF_5LTR   | - |  |
| Galago_moholi_ctg3130                          | 47364    | 50286       | HERVHF_pol    | - |  |
| Galago_moholi_ctg3130                          | 51296    | 51958       | HERVHF_gag    | - |  |
| Galago_moholi_ctg3130                          | 58357    | 59103       | HERVHF_3LTR   | - |  |
| Galago_moholi_ctg6283                          | 48549    | 49464       | HERVHF_5LTR   | - |  |
| Galago_moholi_ctg6283                          | 55524    | 56548       | HERVHF_pol    | - |  |
| Galago_moholi_ctg6283                          | 60065    | 60972       | HERVHF_3LTR   | - |  |
| Galago_moholi_ctg7351                          | 21674    | 22071       | HERVW9_5LTR   | - |  |
| Galago_moholi_ctg7351                          | 23251    | 25812       | HERVW9_pol    | - |  |
| Galago_moholi_ctg7351                          | 26530    | 27114       | HERVW9_gag    | - |  |
| Galago_moholi_ctg7351                          | 29094    | 29480       | HERVW9_3LTR   | - |  |
| Galago_moholi_ctg7630                          | 80228490 |             | HERVW9_5LTR   | + |  |
| Galago_moholi_ctg7630                          | 15242    | 17368       | HERVW9_pol    | + |  |
| Galago_moholi_ctg7630                          | 18028    | 18503       | HERVW9_3LTR   | + |  |
| Gorilla_gorilla_gorilla_002198F_quiver_patched |          | 14017 14352 | HERVHF_5LTR   | - |  |
| Gorilla_gorilla_gorilla_002198F_quiver_patched |          | 15594 17211 | HERVHF_pol    | - |  |
| Gorilla_gorilla_gorilla_002198F_quiver_patched |          | 16807 17631 | HERVHF_pro    | - |  |
| Gorilla_gorilla_gorilla_002198F_quiver_patched |          | 17706 18188 | HERVHF_gag    | - |  |
| Gorilla_gorilla_gorilla_002198F_quiver_patched |          | 18741 19069 | HERVHF_3LTR   | - |  |
| Gorilla_gorilla_gorilla_chr1                   | 4452990  | 4453326     | HERVHF_5LTR   | + |  |
| Gorilla_gorilla_gorilla_chr1                   | 4455933  | 4458184     | HERVHF_pol    | + |  |
| Gorilla_gorilla_gorilla_chr1                   | 4460558  | 4461302     | HERVHF_env    | + |  |
| Gorilla_gorilla_gorilla_chr1                   | 4461527  | 4461879     | HERVHF_3LTR   | + |  |
| Gorilla_gorilla_gorilla_chr1                   | 12150798 | 12151209    | HERVHF_5LTR   | + |  |
| Gorilla_gorilla_gorilla_chr1                   | 12152142 | 12154315    | HERVHF_gag    | + |  |
| Gorilla_gorilla_gorilla_chr1                   | 12154305 | 12155282    | HERVHF_pro    | + |  |



|                              |          |          |                |   |
|------------------------------|----------|----------|----------------|---|
| Gorilla_gorilla_gorilla_chr1 | 12154656 | 12157074 | HERVHF_pol     | + |
| Gorilla_gorilla_gorilla_chr1 | 12157557 | 12157968 | HERVHF_3LTR    | + |
| Gorilla_gorilla_gorilla_chr1 | 37351251 | 37351663 | HERVHF_5LTR    | + |
| Gorilla_gorilla_gorilla_chr1 | 37353277 | 37353663 | HERVHF_gag     | + |
| Gorilla_gorilla_gorilla_chr1 | 37353735 | 37354490 | HERVHF_pro     | + |
| Gorilla_gorilla_gorilla_chr1 | 37354110 | 37356110 | HERVHF_pol     | + |
| Gorilla_gorilla_gorilla_chr1 | 37356503 | 37356916 | HERVHF_3LTR    | + |
| Gorilla_gorilla_gorilla_chr1 | 44741319 | 44741676 | HERVIPADP_5LTR | - |
| Gorilla_gorilla_gorilla_chr1 | 44741837 | 44742397 | HERVIPADP_env  | - |
| Gorilla_gorilla_gorilla_chr1 | 44743823 | 44747122 | HERVIPADP_pol  | - |
| Gorilla_gorilla_gorilla_chr1 | 44747762 | 44748073 | HERVIPADP_gag  | - |
| Gorilla_gorilla_gorilla_chr1 | 44750145 | 44750502 | HERVIPADP_3LTR | - |
| Gorilla_gorilla_gorilla_chr1 | 47164062 | 47164480 | HERVHF_5LTR    | - |
| Gorilla_gorilla_gorilla_chr1 | 47165055 | 47166878 | HERVHF_pol     | - |
| Gorilla_gorilla_gorilla_chr1 | 47167314 | 47167832 | HERVHF_gag     | - |
| Gorilla_gorilla_gorilla_chr1 | 47169393 | 47169821 | HERVHF_3LTR    | - |
| Gorilla_gorilla_gorilla_chr1 | 52372687 | 52373132 | HERVHF_5LTR    | + |
| Gorilla_gorilla_gorilla_chr1 | 52374693 | 52375064 | HERVHF_gag     | + |
| Gorilla_gorilla_gorilla_chr1 | 52375126 | 52375968 | HERVHF_pro     | + |
| Gorilla_gorilla_gorilla_chr1 | 52375330 | 52377551 | HERVHF_pol     | + |
| Gorilla_gorilla_gorilla_chr1 | 52377942 | 52378387 | HERVHF_3LTR    | + |
| Gorilla_gorilla_gorilla_chr1 | 75857095 | 75857513 | HERVHF_5LTR    | - |
| Gorilla_gorilla_gorilla_chr1 | 75858104 | 75860019 | HERVHF_pol     | - |
| Gorilla_gorilla_gorilla_chr1 | 75859450 | 75860307 | HERVHF_pro     | - |
| Gorilla_gorilla_gorilla_chr1 | 75862249 | 75862674 | HERVHF_3LTR    | - |
| Gorilla_gorilla_gorilla_chr1 | 78505033 | 78505430 | HERVHF_5LTR    | - |
| Gorilla_gorilla_gorilla_chr1 | 78505838 | 78508003 | HERVHF_pol     | - |
| Gorilla_gorilla_gorilla_chr1 | 78510266 | 78510673 | HERVHF_3LTR    | - |
| Gorilla_gorilla_gorilla_chr1 | 78710572 | 78711008 | HERVHF_5LTR    | - |
| Gorilla_gorilla_gorilla_chr1 | 78711415 | 78713458 | HERVHF_pol     | - |
| Gorilla_gorilla_gorilla_chr1 | 78713018 | 78713659 | HERVHF_pro     | - |
| Gorilla_gorilla_gorilla_chr1 | 78715992 | 78716436 | HERVHF_3LTR    | - |
| Gorilla_gorilla_gorilla_chr1 | 93644387 | 93644696 | HERVHF_5LTR    | - |
| Gorilla_gorilla_gorilla_chr1 | 93645428 | 93647740 | HERVHF_pol     | - |
| Gorilla_gorilla_gorilla_chr1 | 93647177 | 93647902 | HERVHF_pro     | - |
| Gorilla_gorilla_gorilla_chr1 | 93648065 | 93648996 | HERVHF_gag     | - |
| Gorilla_gorilla_gorilla_chr1 | 93650289 | 93650595 | HERVHF_3LTR    | - |
| Gorilla_gorilla_gorilla_chr1 | 97871087 | 97871527 | HERVHF_5LTR    | - |
| Gorilla_gorilla_gorilla_chr1 | 97871939 | 97874253 | HERVHF_pol     | - |
| Gorilla_gorilla_gorilla_chr1 | 97873828 | 97874427 | HERVHF_pro     | - |
| Gorilla_gorilla_gorilla_chr1 | 97874713 | 97875191 | HERVHF_gag     | - |
| Gorilla_gorilla_gorilla_chr1 | 97876598 | 97877031 | HERVHF_3LTR    | - |
| Gorilla_gorilla_gorilla_chr1 | 98581622 | 98582065 | HERVHF_5LTR    | + |
| Gorilla_gorilla_gorilla_chr1 | 98583874 | 98584290 | HERVHF_gag     | + |

|                              |           |           |             |   |
|------------------------------|-----------|-----------|-------------|---|
| Gorilla_gorilla_gorilla_chr1 | 98584327  | 98585100  | HERVHF_pro  | + |
| Gorilla_gorilla_gorilla_chr1 | 98584489  | 98586466  | HERVHF_pol  | + |
| Gorilla_gorilla_gorilla_chr1 | 98587112  | 98587564  | HERVHF_3LTR | + |
| Gorilla_gorilla_gorilla_chr1 | 157023619 | 157024057 | HERVHF_5LTR | + |
| Gorilla_gorilla_gorilla_chr1 | 157026002 | 157026331 | HERVHF_gag  | + |
| Gorilla_gorilla_gorilla_chr1 | 157026760 | 157028750 | HERVHF_pol  | + |
| Gorilla_gorilla_gorilla_chr1 | 157029181 | 157029615 | HERVHF_3LTR | + |
| Gorilla_gorilla_gorilla_chr1 | 159360967 | 159361422 | HERVHF_5LTR | - |
| Gorilla_gorilla_gorilla_chr1 | 159361877 | 159363908 | HERVHF_pol  | - |
| Gorilla_gorilla_gorilla_chr1 | 159364246 | 159364569 | HERVHF_gag  | - |
| Gorilla_gorilla_gorilla_chr1 | 159366411 | 159366869 | HERVHF_3LTR | - |
| Gorilla_gorilla_gorilla_chr1 | 171483819 | 171484165 | HERVHF_5LTR | + |
| Gorilla_gorilla_gorilla_chr1 | 171486462 | 171486905 | HERVHF_pro  | + |
| Gorilla_gorilla_gorilla_chr1 | 171486845 | 171488732 | HERVHF_pol  | + |
| Gorilla_gorilla_gorilla_chr1 | 171489749 | 171490097 | HERVHF_3LTR | + |
| Gorilla_gorilla_gorilla_chr1 | 179342772 | 179343217 | HERVK_5LTR  | + |
| Gorilla_gorilla_gorilla_chr1 | 179344692 | 179345629 | HERVK_pro   | + |
| Gorilla_gorilla_gorilla_chr1 | 179345524 | 179346793 | HERVK_pol   | + |
| Gorilla_gorilla_gorilla_chr1 | 179347287 | 179347638 | HERVK_env   | + |
| Gorilla_gorilla_gorilla_chr1 | 179347724 | 179348161 | HERVK_3LTR  | + |
| Gorilla_gorilla_gorilla_chr1 | 182903392 | 182903859 | HERVHF_5LTR | + |
| Gorilla_gorilla_gorilla_chr1 | 182906398 | 182907583 | HERVHF_pol  | + |
| Gorilla_gorilla_gorilla_chr1 | 182908211 | 182908671 | HERVHF_3LTR | + |
| Gorilla_gorilla_gorilla_chr1 | 189475210 | 189475622 | HERVHF_5LTR | + |
| Gorilla_gorilla_gorilla_chr1 | 189477701 | 189478480 | HERVHF_pro  | + |
| Gorilla_gorilla_gorilla_chr1 | 189477866 | 189479907 | HERVHF_pol  | + |
| Gorilla_gorilla_gorilla_chr1 | 189480466 | 189480878 | HERVHF_3LTR | + |
| Gorilla_gorilla_gorilla_chr1 | 189613665 | 189613998 | HERVHF_5LTR | + |
| Gorilla_gorilla_gorilla_chr1 | 189616175 | 189617005 | HERVHF_pro  | + |
| Gorilla_gorilla_gorilla_chr1 | 189616424 | 189617182 | HERVHF_pol  | + |
| Gorilla_gorilla_gorilla_chr1 | 189619316 | 189620197 | HERVHF_env  | + |
| Gorilla_gorilla_gorilla_chr1 | 189620370 | 189620695 | HERVHF_3LTR | + |
| Gorilla_gorilla_gorilla_chr1 | 195406518 | 195406983 | HERVHF_5LTR | + |
| Gorilla_gorilla_gorilla_chr1 | 195409233 | 195410123 | HERVHF_pro  | + |
| Gorilla_gorilla_gorilla_chr1 | 195409575 | 195410749 | HERVHF_pol  | + |
| Gorilla_gorilla_gorilla_chr1 | 195416915 | 195417382 | HERVHF_3LTR | + |
| Gorilla_gorilla_gorilla_chr1 | 202015628 | 202016017 | HERVHF_5LTR | + |
| Gorilla_gorilla_gorilla_chr1 | 202017802 | 202018122 | HERVHF_gag  | + |
| Gorilla_gorilla_gorilla_chr1 | 202018210 | 202018959 | HERVHF_pro  | + |
| Gorilla_gorilla_gorilla_chr1 | 202018417 | 202020535 | HERVHF_pol  | + |
| Gorilla_gorilla_gorilla_chr1 | 202021023 | 202021395 | HERVHF_3LTR | + |
| Gorilla_gorilla_gorilla_chr1 | 202870854 | 202871257 | HERVHF_5LTR | + |
| Gorilla_gorilla_gorilla_chr1 | 202873290 | 202873877 | HERVHF_pro  | + |
| Gorilla_gorilla_gorilla_chr1 | 202873810 | 202875561 | HERVHF_pol  | + |

|                               |           |           |             |   |
|-------------------------------|-----------|-----------|-------------|---|
| Gorilla_gorilla_gorilla_chr1  | 202876143 | 202876554 | HERVHF_3LTR | + |
| Gorilla_gorilla_gorilla_chr1  | 204710155 | 204710585 | HERVHF_5LTR | - |
| Gorilla_gorilla_gorilla_chr1  | 204711024 | 204713652 | HERVHF_pol  | - |
| Gorilla_gorilla_gorilla_chr1  | 204713110 | 204713859 | HERVHF_pro  | - |
| Gorilla_gorilla_gorilla_chr1  | 204714049 | 204714390 | HERVHF_gag  | - |
| Gorilla_gorilla_gorilla_chr1  | 204715720 | 204716150 | HERVHF_3LTR | - |
| Gorilla_gorilla_gorilla_chr1  | 205107945 | 205108377 | HERVHF_5LTR | - |
| Gorilla_gorilla_gorilla_chr1  | 205109212 | 205110907 | HERVHF_pol  | - |
| Gorilla_gorilla_gorilla_chr1  | 205111201 | 205111530 | HERVHF_gag  | - |
| Gorilla_gorilla_gorilla_chr1  | 205113198 | 205113634 | HERVHF_3LTR | - |
| Gorilla_gorilla_gorilla_chr10 | 5578876   | 5579290   | HERVHF_5LTR | + |
| Gorilla_gorilla_gorilla_chr10 | 5581351   | 5581650   | HERVHF_gag  | + |
| Gorilla_gorilla_gorilla_chr10 | 5581947   | 5582477   | HERVHF_pro  | + |
| Gorilla_gorilla_gorilla_chr10 | 5582070   | 5584223   | HERVHF_pol  | + |
| Gorilla_gorilla_gorilla_chr10 | 5584672   | 5585084   | HERVHF_3LTR | + |
| Gorilla_gorilla_gorilla_chr10 | 6987370   | 6987823   | HERVHF_5LTR | - |
| Gorilla_gorilla_gorilla_chr10 | 6988276   | 6990204   | HERVHF_pol  | - |
| Gorilla_gorilla_gorilla_chr10 | 6992836   | 6993290   | HERVHF_3LTR | - |
| Gorilla_gorilla_gorilla_chr10 | 26375925  | 26376260  | HERVHF_5LTR | + |
| Gorilla_gorilla_gorilla_chr10 | 26377734  | 26378312  | HERVHF_gag  | + |
| Gorilla_gorilla_gorilla_chr10 | 26378309  | 26379148  | HERVHF_pro  | + |
| Gorilla_gorilla_gorilla_chr10 | 26378510  | 26381455  | HERVHF_pol  | + |
| Gorilla_gorilla_gorilla_chr10 | 26381969  | 26382313  | HERVHF_3LTR | + |
| Gorilla_gorilla_gorilla_chr10 | 26428862  | 26429239  | HERVHF_5LTR | - |
| Gorilla_gorilla_gorilla_chr10 | 26430361  | 26431649  | HERVHF_pol  | - |
| Gorilla_gorilla_gorilla_chr10 | 26431053  | 26431937  | HERVHF_pro  | - |
| Gorilla_gorilla_gorilla_chr10 | 26432048  | 26432955  | HERVHF_gag  | - |
| Gorilla_gorilla_gorilla_chr10 | 26434426  | 26434808  | HERVHF_3LTR | - |
| Gorilla_gorilla_gorilla_chr10 | 30583504  | 30583945  | HERVHF_5LTR | - |
| Gorilla_gorilla_gorilla_chr10 | 30584401  | 30585893  | HERVHF_pol  | - |
| Gorilla_gorilla_gorilla_chr10 | 30585381  | 30586109  | HERVHF_pro  | - |
| Gorilla_gorilla_gorilla_chr10 | 30586187  | 30586507  | HERVHF_gag  | - |
| Gorilla_gorilla_gorilla_chr10 | 30588537  | 30588978  | HERVHF_3LTR | - |
| Gorilla_gorilla_gorilla_chr10 | 48559730  | 48560137  | HERVHF_5LTR | + |
| Gorilla_gorilla_gorilla_chr10 | 48560915  | 48561721  | HERVHF_pro  | + |
| Gorilla_gorilla_gorilla_chr10 | 48561206  | 48563155  | HERVHF_pol  | + |
| Gorilla_gorilla_gorilla_chr10 | 48563743  | 48564159  | HERVHF_3LTR | + |
| Gorilla_gorilla_gorilla_chr10 | 53148954  | 53149402  | HERVHF_5LTR | - |
| Gorilla_gorilla_gorilla_chr10 | 53149868  | 53151948  | HERVHF_pol  | - |
| Gorilla_gorilla_gorilla_chr10 | 53151406  | 53152209  | HERVHF_pro  | - |
| Gorilla_gorilla_gorilla_chr10 | 53154431  | 53154883  | HERVHF_3LTR | - |
| Gorilla_gorilla_gorilla_chr10 | 53875975  | 53876426  | HERVHF_5LTR | + |
| Gorilla_gorilla_gorilla_chr10 | 53878208  | 53878537  | HERVHF_gag  | + |
| Gorilla_gorilla_gorilla_chr10 | 53878966  | 53887254  | HERVHF_pol  | + |

|                               |           |           |             |   |
|-------------------------------|-----------|-----------|-------------|---|
| Gorilla_gorilla_gorilla_chr10 | 53887646  | 53888103  | HERVHF_3LTR | + |
| Gorilla_gorilla_gorilla_chr10 | 91237709  | 91238161  | HERVHF_5LTR | + |
| Gorilla_gorilla_gorilla_chr10 | 91240039  | 91240362  | HERVHF_gag  | + |
| Gorilla_gorilla_gorilla_chr10 | 91240414  | 91241178  | HERVHF_pro  | + |
| Gorilla_gorilla_gorilla_chr10 | 91240618  | 91242438  | HERVHF_pol  | + |
| Gorilla_gorilla_gorilla_chr10 | 91243039  | 91243491  | HERVHF_3LTR | + |
| Gorilla_gorilla_gorilla_chr10 | 92756976  | 92757424  | HERVHF_5LTR | + |
| Gorilla_gorilla_gorilla_chr10 | 92758381  | 92758704  | HERVHF_gag  | + |
| Gorilla_gorilla_gorilla_chr10 | 92758741  | 92759514  | HERVHF_pro  | + |
| Gorilla_gorilla_gorilla_chr10 | 92758957  | 92759670  | HERVHF_pol  | + |
| Gorilla_gorilla_gorilla_chr10 | 92760183  | 92760625  | HERVHF_3LTR | + |
| Gorilla_gorilla_gorilla_chr10 | 97206282  | 97206649  | HERVHF_5LTR | - |
| Gorilla_gorilla_gorilla_chr10 | 97206813  | 97207387  | HERVHF_env  | - |
| Gorilla_gorilla_gorilla_chr10 | 97208422  | 97210561  | HERVHF_pol  | - |
| Gorilla_gorilla_gorilla_chr10 | 97211301  | 97211642  | HERVHF_gag  | - |
| Gorilla_gorilla_gorilla_chr10 | 97212895  | 97213262  | HERVHF_3LTR | - |
| Gorilla_gorilla_gorilla_chr10 | 116900714 | 116901039 | HERVHF_5LTR | + |
| Gorilla_gorilla_gorilla_chr10 | 116903046 | 116903876 | HERVHF_pro  | + |
| Gorilla_gorilla_gorilla_chr10 | 116903334 | 116905257 | HERVHF_pol  | + |
| Gorilla_gorilla_gorilla_chr10 | 116905970 | 116906291 | HERVHF_3LTR | + |
| Gorilla_gorilla_gorilla_chr11 | 4862098   | 4862512   | HERVHF_5LTR | - |
| Gorilla_gorilla_gorilla_chr11 | 4862906   | 4864889   | HERVHF_pol  | - |
| Gorilla_gorilla_gorilla_chr11 | 4865347   | 4865649   | HERVHF_gag  | - |
| Gorilla_gorilla_gorilla_chr11 | 4867489   | 4867903   | HERVHF_3LTR | - |
| Gorilla_gorilla_gorilla_chr11 | 6106414   | 6106734   | HERVHF_5LTR | + |
| Gorilla_gorilla_gorilla_chr11 | 6108336   | 6108644   | HERVHF_gag  | + |
| Gorilla_gorilla_gorilla_chr11 | 6108962   | 6111203   | HERVHF_pol  | + |
| Gorilla_gorilla_gorilla_chr11 | 6111652   | 6111962   | HERVHF_3LTR | + |
| Gorilla_gorilla_gorilla_chr11 | 7739811   | 7740264   | HERVHF_5LTR | - |
| Gorilla_gorilla_gorilla_chr11 | 7740661   | 7742773   | HERVHF_pol  | - |
| Gorilla_gorilla_gorilla_chr11 | 7742231   | 7743061   | HERVHF_pro  | - |
| Gorilla_gorilla_gorilla_chr11 | 7743068   | 7743397   | HERVHF_gag  | - |
| Gorilla_gorilla_gorilla_chr11 | 7745214   | 7745670   | HERVHF_3LTR | - |
| Gorilla_gorilla_gorilla_chr11 | 10029822  | 10030252  | HERVHF_5LTR | + |
| Gorilla_gorilla_gorilla_chr11 | 10030740  | 10031429  | HERVHF_pro  | + |
| Gorilla_gorilla_gorilla_chr11 | 10030800  | 10033437  | HERVHF_pol  | + |
| Gorilla_gorilla_gorilla_chr11 | 10033663  | 10034010  | HERVHF_env  | + |
| Gorilla_gorilla_gorilla_chr11 | 10034187  | 10034619  | HERVHF_3LTR | + |
| Gorilla_gorilla_gorilla_chr11 | 18695776  | 18696231  | HERVHF_5LTR | - |
| Gorilla_gorilla_gorilla_chr11 | 18697119  | 18698611  | HERVHF_pol  | - |
| Gorilla_gorilla_gorilla_chr11 | 18699045  | 18699362  | HERVHF_gag  | - |
| Gorilla_gorilla_gorilla_chr11 | 18701100  | 18701553  | HERVHF_3LTR | - |
| Gorilla_gorilla_gorilla_chr11 | 23159792  | 23160246  | HERVHF_5LTR | - |
| Gorilla_gorilla_gorilla_chr11 | 23160718  | 23162659  | HERVHF_pol  | - |

|                               |           |           |             |   |
|-------------------------------|-----------|-----------|-------------|---|
| Gorilla_gorilla_gorilla_chr11 | 23162193  | 23162993  | HERVHF_pro  | - |
| Gorilla_gorilla_gorilla_chr11 | 23163051  | 23163380  | HERVHF_gag  | - |
| Gorilla_gorilla_gorilla_chr11 | 23165183  | 23165643  | HERVHF_3LTR | - |
| Gorilla_gorilla_gorilla_chr11 | 59788579  | 59788990  | HERVHF_5LTR | + |
| Gorilla_gorilla_gorilla_chr11 | 59790726  | 59791025  | HERVHF_gag  | + |
| Gorilla_gorilla_gorilla_chr11 | 59791536  | 59793287  | HERVHF_pol  | + |
| Gorilla_gorilla_gorilla_chr11 | 59793859  | 59794272  | HERVHF_3LTR | + |
| Gorilla_gorilla_gorilla_chr11 | 60639676  | 60639996  | HERVHF_5LTR | + |
| Gorilla_gorilla_gorilla_chr11 | 60643150  | 60643512  | HERVHF_gag  | + |
| Gorilla_gorilla_gorilla_chr11 | 60643849  | 60645977  | HERVHF_pol  | + |
| Gorilla_gorilla_gorilla_chr11 | 60646324  | 60646642  | HERVHF_3LTR | + |
| Gorilla_gorilla_gorilla_chr11 | 73776377  | 73776709  | HERVHF_5LTR | + |
| Gorilla_gorilla_gorilla_chr11 | 73778675  | 73779487  | HERVHF_pro  | + |
| Gorilla_gorilla_gorilla_chr11 | 73778966  | 73780299  | HERVHF_pol  | + |
| Gorilla_gorilla_gorilla_chr11 | 73781542  | 73781857  | HERVHF_3LTR | + |
| Gorilla_gorilla_gorilla_chr11 | 86023589  | 86023982  | HERVHF_5LTR | + |
| Gorilla_gorilla_gorilla_chr11 | 86025773  | 86026195  | HERVHF_gag  | + |
| Gorilla_gorilla_gorilla_chr11 | 86026424  | 86027008  | HERVHF_pro  | + |
| Gorilla_gorilla_gorilla_chr11 | 86026466  | 86028408  | HERVHF_pol  | + |
| Gorilla_gorilla_gorilla_chr11 | 86028998  | 86029383  | HERVHF_3LTR | + |
| Gorilla_gorilla_gorilla_chr11 | 86697233  | 86697696  | HERVHF_5LTR | + |
| Gorilla_gorilla_gorilla_chr11 | 86699280  | 86699660  | HERVHF_gag  | + |
| Gorilla_gorilla_gorilla_chr11 | 86699974  | 86702056  | HERVHF_pol  | + |
| Gorilla_gorilla_gorilla_chr11 | 86704257  | 86704856  | HERVHF_env  | + |
| Gorilla_gorilla_gorilla_chr11 | 86705021  | 86705495  | HERVHF_3LTR | + |
| Gorilla_gorilla_gorilla_chr11 | 122079792 | 122080158 | HERVHF_5LTR | - |
| Gorilla_gorilla_gorilla_chr11 | 122080724 | 122082585 | HERVHF_pol  | - |
| Gorilla_gorilla_gorilla_chr11 | 122082231 | 122082941 | HERVHF_pro  | - |
| Gorilla_gorilla_gorilla_chr11 | 122084922 | 122085279 | HERVHF_3LTR | - |
| Gorilla_gorilla_gorilla_chr11 | 124976603 | 124977015 | HERVHF_5LTR | + |
| Gorilla_gorilla_gorilla_chr11 | 124979275 | 124980000 | HERVHF_pro  | + |
| Gorilla_gorilla_gorilla_chr11 | 124979617 | 124981709 | HERVHF_pol  | + |
| Gorilla_gorilla_gorilla_chr11 | 124982220 | 124982632 | HERVHF_3LTR | + |
| Gorilla_gorilla_gorilla_chr12 | 4024039   | 4024502   | HERVHF_5LTR | + |
| Gorilla_gorilla_gorilla_chr12 | 4026809   | 4027342   | HERVHF_pro  | + |
| Gorilla_gorilla_gorilla_chr12 | 4026932   | 4028059   | HERVHF_pol  | + |
| Gorilla_gorilla_gorilla_chr12 | 4028716   | 4029177   | HERVHF_3LTR | + |
| Gorilla_gorilla_gorilla_chr12 | 11043531  | 11043995  | HERVHF_5LTR | - |
| Gorilla_gorilla_gorilla_chr12 | 11044563  | 11046513  | HERVHF_pol  | - |
| Gorilla_gorilla_gorilla_chr12 | 11046917  | 11047228  | HERVHF_gag  | - |
| Gorilla_gorilla_gorilla_chr12 | 11048986  | 11049458  | HERVHF_3LTR | - |
| Gorilla_gorilla_gorilla_chr12 | 11189667  | 11190143  | HERVHF_5LTR | - |
| Gorilla_gorilla_gorilla_chr12 | 11190506  | 11192467  | HERVHF_pol  | - |
| Gorilla_gorilla_gorilla_chr12 | 11192060  | 11192641  | HERVHF_pro  | - |

|                               |          |          |             |   |
|-------------------------------|----------|----------|-------------|---|
| Gorilla_gorilla_gorilla_chr12 | 11192913 | 11193296 | HERVHF_gag  | - |
| Gorilla_gorilla_gorilla_chr12 | 11194926 | 11195398 | HERVHF_3LTR | - |
| Gorilla_gorilla_gorilla_chr12 | 16591088 | 16591523 | HERVHF_5LTR | - |
| Gorilla_gorilla_gorilla_chr12 | 16591910 | 16594081 | HERVHF_pol  | - |
| Gorilla_gorilla_gorilla_chr12 | 16593500 | 16594306 | HERVHF_pro  | - |
| Gorilla_gorilla_gorilla_chr12 | 16596261 | 16596694 | HERVHF_3LTR | - |
| Gorilla_gorilla_gorilla_chr12 | 26294360 | 26294852 | HERVHF_5LTR | + |
| Gorilla_gorilla_gorilla_chr12 | 26296487 | 26296855 | HERVHF_gag  | + |
| Gorilla_gorilla_gorilla_chr12 | 26296902 | 26297378 | HERVHF_pro  | + |
| Gorilla_gorilla_gorilla_chr12 | 26297389 | 26298881 | HERVHF_pol  | + |
| Gorilla_gorilla_gorilla_chr12 | 26299698 | 26300184 | HERVHF_3LTR | + |
| Gorilla_gorilla_gorilla_chr12 | 52784859 | 52785270 | HERVHF_5LTR | - |
| Gorilla_gorilla_gorilla_chr12 | 52785724 | 52788430 | HERVHF_pol  | - |
| Gorilla_gorilla_gorilla_chr12 | 52788861 | 52789193 | HERVHF_gag  | - |
| Gorilla_gorilla_gorilla_chr12 | 52790805 | 52791217 | HERVHF_3LTR | - |
| Gorilla_gorilla_gorilla_chr12 | 53712495 | 53712943 | HERVHF_5LTR | + |
| Gorilla_gorilla_gorilla_chr12 | 53715234 | 53717788 | HERVHF_pol  | + |
| Gorilla_gorilla_gorilla_chr12 | 53718223 | 53718671 | HERVHF_3LTR | + |
| Gorilla_gorilla_gorilla_chr12 | 57693411 | 57693763 | HERVHF_5LTR | - |
| Gorilla_gorilla_gorilla_chr12 | 57694043 | 57694959 | HERVHF_env  | - |
| Gorilla_gorilla_gorilla_chr12 | 57695794 | 57697081 | HERVHF_pol  | - |
| Gorilla_gorilla_gorilla_chr12 | 57696566 | 57697258 | HERVHF_pro  | - |
| Gorilla_gorilla_gorilla_chr12 | 57699414 | 57699770 | HERVHF_3LTR | - |
| Gorilla_gorilla_gorilla_chr12 | 64632329 | 64632779 | HERVHF_5LTR | - |
| Gorilla_gorilla_gorilla_chr12 | 64633191 | 64634950 | HERVHF_pol  | - |
| Gorilla_gorilla_gorilla_chr12 | 64637582 | 64638034 | HERVHF_3LTR | - |
| Gorilla_gorilla_gorilla_chr12 | 69884716 | 69885145 | HERVHF_5LTR | - |
| Gorilla_gorilla_gorilla_chr12 | 69886353 | 69887751 | HERVHF_pol  | - |
| Gorilla_gorilla_gorilla_chr12 | 69890187 | 69890613 | HERVHF_3LTR | - |
| Gorilla_gorilla_gorilla_chr12 | 76446860 | 76447313 | HERVHF_5LTR | + |
| Gorilla_gorilla_gorilla_chr12 | 76448937 | 76449260 | HERVHF_gag  | + |
| Gorilla_gorilla_gorilla_chr12 | 76449383 | 76449775 | HERVHF_pro  | + |
| Gorilla_gorilla_gorilla_chr12 | 76449846 | 76451646 | HERVHF_pol  | + |
| Gorilla_gorilla_gorilla_chr12 | 76452177 | 76452633 | HERVHF_3LTR | + |
| Gorilla_gorilla_gorilla_chr12 | 83965502 | 83965877 | HERVHF_5LTR | + |
| Gorilla_gorilla_gorilla_chr12 | 83967694 | 83968023 | HERVHF_gag  | + |
| Gorilla_gorilla_gorilla_chr12 | 83968465 | 83970464 | HERVHF_pol  | + |
| Gorilla_gorilla_gorilla_chr12 | 83971091 | 83971481 | HERVHF_3LTR | + |
| Gorilla_gorilla_gorilla_chr12 | 84938033 | 84938378 | HERVHF_5LTR | - |
| Gorilla_gorilla_gorilla_chr12 | 84938874 | 84940974 | HERVHF_pol  | - |
| Gorilla_gorilla_gorilla_chr12 | 84943216 | 84943558 | HERVHF_3LTR | - |
| Gorilla_gorilla_gorilla_chr12 | 96772687 | 96773106 | HERVHF_5LTR | + |
| Gorilla_gorilla_gorilla_chr12 | 96774877 | 96775203 | HERVHF_gag  | + |
| Gorilla_gorilla_gorilla_chr12 | 96775207 | 96776040 | HERVHF_pro  | + |

|                               |           |           |             |   |
|-------------------------------|-----------|-----------|-------------|---|
| Gorilla_gorilla_gorilla_chr12 | 96775498  | 96777509  | HERVHF_pol  | + |
| Gorilla_gorilla_gorilla_chr12 | 96778558  | 96778968  | HERVHF_3LTR | + |
| Gorilla_gorilla_gorilla_chr12 | 100288162 | 100289024 | HERVHF_5LTR | - |
| Gorilla_gorilla_gorilla_chr12 | 100289625 | 100291819 | HERVHF_pol  | - |
| Gorilla_gorilla_gorilla_chr12 | 100291983 | 100292303 | HERVHF_gag  | - |
| Gorilla_gorilla_gorilla_chr12 | 100294139 | 100295020 | HERVHF_3LTR | - |
| Gorilla_gorilla_gorilla_chr12 | 111113999 | 111114420 | HERVHF_5LTR | + |
| Gorilla_gorilla_gorilla_chr12 | 111115524 | 111116027 | HERVHF_gag  | + |
| Gorilla_gorilla_gorilla_chr12 | 111116752 | 111120279 | HERVHF_pol  | + |
| Gorilla_gorilla_gorilla_chr12 | 111121480 | 111122052 | HERVHF_env  | + |
| Gorilla_gorilla_gorilla_chr12 | 111122225 | 111122654 | HERVHF_3LTR | + |
| Gorilla_gorilla_gorilla_chr13 | 841418    | 841916    | HERVK_5LTR  | + |
| Gorilla_gorilla_gorilla_chr13 | 842802    | 843722    | HERVK_pro   | + |
| Gorilla_gorilla_gorilla_chr13 | 843590    | 845017    | HERVK_pol   | + |
| Gorilla_gorilla_gorilla_chr13 | 845812    | 846318    | HERVK_3LTR  | + |
| Gorilla_gorilla_gorilla_chr13 | 17605338  | 17605805  | HERVHF_5LTR | + |
| Gorilla_gorilla_gorilla_chr13 | 17607533  | 17607916  | HERVHF_gag  | + |
| Gorilla_gorilla_gorilla_chr13 | 17608238  | 17610357  | HERVHF_pol  | + |
| Gorilla_gorilla_gorilla_chr13 | 17610749  | 17611211  | HERVHF_3LTR | + |
| Gorilla_gorilla_gorilla_chr13 | 30136242  | 30136577  | HERVHF_5LTR | - |
| Gorilla_gorilla_gorilla_chr13 | 30137006  | 30139468  | HERVHF_pol  | - |
| Gorilla_gorilla_gorilla_chr13 | 30138926  | 30139801  | HERVHF_pro  | - |
| Gorilla_gorilla_gorilla_chr13 | 30141767  | 30142105  | HERVHF_3LTR | - |
| Gorilla_gorilla_gorilla_chr13 | 35432656  | 35432956  | HERVHF_5LTR | - |
| Gorilla_gorilla_gorilla_chr13 | 35433545  | 35435861  | HERVHF_pol  | - |
| Gorilla_gorilla_gorilla_chr13 | 35435223  | 35435966  | HERVHF_pro  | - |
| Gorilla_gorilla_gorilla_chr13 | 35436064  | 35436402  | HERVHF_gag  | - |
| Gorilla_gorilla_gorilla_chr13 | 35437969  | 35438280  | HERVHF_3LTR | - |
| Gorilla_gorilla_gorilla_chr13 | 36883032  | 36883484  | HERVHF_5LTR | - |
| Gorilla_gorilla_gorilla_chr13 | 36884198  | 36885259  | HERVHF_pol  | - |
| Gorilla_gorilla_gorilla_chr13 | 36885151  | 36885672  | HERVHF_pro  | - |
| Gorilla_gorilla_gorilla_chr13 | 36885676  | 36886089  | HERVHF_gag  | - |
| Gorilla_gorilla_gorilla_chr13 | 36887806  | 36888257  | HERVHF_3LTR | - |
| Gorilla_gorilla_gorilla_chr13 | 36959170  | 36959576  | HERVHF_5LTR | - |
| Gorilla_gorilla_gorilla_chr13 | 36960045  | 36962271  | HERVHF_pol  | - |
| Gorilla_gorilla_gorilla_chr13 | 36962475  | 36962798  | HERVHF_gag  | - |
| Gorilla_gorilla_gorilla_chr13 | 36964653  | 36965050  | HERVHF_3LTR | - |
| Gorilla_gorilla_gorilla_chr13 | 42397629  | 42398033  | HERVHF_5LTR | + |
| Gorilla_gorilla_gorilla_chr13 | 42398770  | 42399108  | HERVHF_gag  | + |
| Gorilla_gorilla_gorilla_chr13 | 42399460  | 42401791  | HERVHF_pol  | + |
| Gorilla_gorilla_gorilla_chr13 | 42402824  | 42403229  | HERVHF_3LTR | + |
| Gorilla_gorilla_gorilla_chr13 | 47358436  | 47358763  | HERVHF_5LTR | - |
| Gorilla_gorilla_gorilla_chr13 | 47360115  | 47361249  | HERVHF_pol  | - |
| Gorilla_gorilla_gorilla_chr13 | 47361704  | 47362024  | HERVHF_gag  | - |

|                               |          |          |             |   |
|-------------------------------|----------|----------|-------------|---|
| Gorilla_gorilla_gorilla_chr13 | 47364958 | 47365291 | HERVHF_3LTR | - |
| Gorilla_gorilla_gorilla_chr13 | 59194189 | 59194601 | HERVHF_5LTR | - |
| Gorilla_gorilla_gorilla_chr13 | 59195153 | 59197289 | HERVHF_pol  | - |
| Gorilla_gorilla_gorilla_chr13 | 59196684 | 59197484 | HERVHF_pro  | - |
| Gorilla_gorilla_gorilla_chr13 | 59197931 | 59198434 | HERVHF_gag  | - |
| Gorilla_gorilla_gorilla_chr13 | 59199928 | 59200343 | HERVHF_3LTR | - |
| Gorilla_gorilla_gorilla_chr13 | 65156577 | 65157007 | HERVHF_5LTR | - |
| Gorilla_gorilla_gorilla_chr13 | 65157453 | 65159614 | HERVHF_pol  | - |
| Gorilla_gorilla_gorilla_chr13 | 65158997 | 65159809 | HERVHF_pro  | - |
| Gorilla_gorilla_gorilla_chr13 | 65159813 | 65160136 | HERVHF_gag  | - |
| Gorilla_gorilla_gorilla_chr13 | 65161747 | 65162175 | HERVHF_3LTR | - |
| Gorilla_gorilla_gorilla_chr13 | 67550320 | 67550775 | HERVHF_5LTR | + |
| Gorilla_gorilla_gorilla_chr13 | 67552704 | 67553027 | HERVHF_gag  | + |
| Gorilla_gorilla_gorilla_chr13 | 67553040 | 67553873 | HERVHF_pro  | + |
| Gorilla_gorilla_gorilla_chr13 | 67553322 | 67555406 | HERVHF_pol  | + |
| Gorilla_gorilla_gorilla_chr13 | 67555842 | 67556298 | HERVHF_3LTR | + |
| Gorilla_gorilla_gorilla_chr13 | 72029474 | 72029846 | HERVHF_5LTR | + |
| Gorilla_gorilla_gorilla_chr13 | 72030642 | 72031424 | HERVHF_pro  | + |
| Gorilla_gorilla_gorilla_chr13 | 72030903 | 72032796 | HERVHF_pol  | + |
| Gorilla_gorilla_gorilla_chr13 | 72033419 | 72033785 | HERVHF_3LTR | + |
| Gorilla_gorilla_gorilla_chr14 | 3806580  | 3807033  | HERVHF_5LTR | - |
| Gorilla_gorilla_gorilla_chr14 | 3807442  | 3809618  | HERVHF_pol  | - |
| Gorilla_gorilla_gorilla_chr14 | 3809036  | 3810043  | HERVHF_pro  | - |
| Gorilla_gorilla_gorilla_chr14 | 3810047  | 3810346  | HERVHF_gag  | - |
| Gorilla_gorilla_gorilla_chr14 | 3812064  | 3812522  | HERVHF_3LTR | - |
| Gorilla_gorilla_gorilla_chr14 | 27592793 | 27593095 | HERVHF_5LTR | + |
| Gorilla_gorilla_gorilla_chr14 | 27595412 | 27595735 | HERVHF_gag  | + |
| Gorilla_gorilla_gorilla_chr14 | 27595792 | 27596211 | HERVHF_pro  | + |
| Gorilla_gorilla_gorilla_chr14 | 27596171 | 27596788 | HERVHF_pol  | + |
| Gorilla_gorilla_gorilla_chr14 | 27597380 | 27597679 | HERVHF_3LTR | + |
| Gorilla_gorilla_gorilla_chr14 | 51555848 | 51556258 | HERVHF_5LTR | + |
| Gorilla_gorilla_gorilla_chr14 | 51558108 | 51558446 | HERVHF_gag  | + |
| Gorilla_gorilla_gorilla_chr14 | 51558453 | 51559070 | HERVHF_pro  | + |
| Gorilla_gorilla_gorilla_chr14 | 51558644 | 51560648 | HERVHF_pol  | + |
| Gorilla_gorilla_gorilla_chr14 | 51561253 | 51561662 | HERVHF_3LTR | + |
| Gorilla_gorilla_gorilla_chr14 | 53559947 | 53560294 | HERVHF_5LTR | - |
| Gorilla_gorilla_gorilla_chr14 | 53560460 | 53560834 | HERVHF_env  | - |
| Gorilla_gorilla_gorilla_chr14 | 53561258 | 53562751 | HERVHF_pol  | - |
| Gorilla_gorilla_gorilla_chr14 | 53563090 | 53563545 | HERVHF_gag  | - |
| Gorilla_gorilla_gorilla_chr14 | 53565144 | 53565513 | HERVHF_3LTR | - |
| Gorilla_gorilla_gorilla_chr14 | 54111465 | 54111897 | HERVHF_5LTR | + |
| Gorilla_gorilla_gorilla_chr14 | 54113708 | 54114118 | HERVHF_gag  | + |
| Gorilla_gorilla_gorilla_chr14 | 54114125 | 54114955 | HERVHF_pro  | + |
| Gorilla_gorilla_gorilla_chr14 | 54114317 | 54116488 | HERVHF_pol  | + |



|                               |          |          |             |   |
|-------------------------------|----------|----------|-------------|---|
| Gorilla_gorilla_gorilla_chr14 | 54116939 | 54117372 | HERVHF_3LTR | + |
| Gorilla_gorilla_gorilla_chr14 | 64972207 | 64972639 | HERVHF_5LTR | - |
| Gorilla_gorilla_gorilla_chr14 | 64973644 | 64974974 | HERVHF_pol  | - |
| Gorilla_gorilla_gorilla_chr14 | 64974588 | 64975409 | HERVHF_pro  | - |
| Gorilla_gorilla_gorilla_chr14 | 64975422 | 64975805 | HERVHF_gag  | - |
| Gorilla_gorilla_gorilla_chr14 | 64977470 | 64977891 | HERVHF_3LTR | - |
| Gorilla_gorilla_gorilla_chr14 | 67738635 | 67739045 | HERVHF_5LTR | - |
| Gorilla_gorilla_gorilla_chr14 | 67739444 | 67741981 | HERVHF_pol  | - |
| Gorilla_gorilla_gorilla_chr14 | 67741421 | 67742230 | HERVHF_pro  | - |
| Gorilla_gorilla_gorilla_chr14 | 67744309 | 67744719 | HERVHF_3LTR | - |
| Gorilla_gorilla_gorilla_chr14 | 76490445 | 76490846 | HERVHF_5LTR | + |
| Gorilla_gorilla_gorilla_chr14 | 76492506 | 76492817 | HERVHF_gag  | + |
| Gorilla_gorilla_gorilla_chr14 | 76492850 | 76493662 | HERVHF_pro  | + |
| Gorilla_gorilla_gorilla_chr14 | 76493045 | 76495432 | HERVHF_pol  | + |
| Gorilla_gorilla_gorilla_chr14 | 76495884 | 76496285 | HERVHF_3LTR | + |
| Gorilla_gorilla_gorilla_chr15 | 10556642 | 10557093 | HERVHF_5LTR | + |
| Gorilla_gorilla_gorilla_chr15 | 10558885 | 10559433 | HERVHF_pro  | + |
| Gorilla_gorilla_gorilla_chr15 | 10560034 | 10561495 | HERVHF_pol  | + |
| Gorilla_gorilla_gorilla_chr15 | 10561897 | 10562352 | HERVHF_3LTR | + |
| Gorilla_gorilla_gorilla_chr15 | 11295066 | 11295511 | HERVHF_5LTR | + |
| Gorilla_gorilla_gorilla_chr15 | 11297789 | 11298427 | HERVHF_pro  | + |
| Gorilla_gorilla_gorilla_chr15 | 11297828 | 11298601 | HERVHF_pol  | + |
| Gorilla_gorilla_gorilla_chr15 | 11299742 | 11300175 | HERVHF_3LTR | + |
| Gorilla_gorilla_gorilla_chr15 | 25624744 | 25625156 | HERVHF_5LTR | - |
| Gorilla_gorilla_gorilla_chr15 | 25625324 | 25626228 | HERVHF_env  | - |
| Gorilla_gorilla_gorilla_chr15 | 25627043 | 25628349 | HERVHF_pol  | - |
| Gorilla_gorilla_gorilla_chr15 | 25627831 | 25628349 | HERVHF_pro  | - |
| Gorilla_gorilla_gorilla_chr15 | 25628650 | 25629147 | HERVHF_gag  | - |
| Gorilla_gorilla_gorilla_chr15 | 25630557 | 25630960 | HERVHF_3LTR | - |
| Gorilla_gorilla_gorilla_chr15 | 29324992 | 29325376 | HERVHF_5LTR | - |
| Gorilla_gorilla_gorilla_chr15 | 29325826 | 29327805 | HERVHF_pol  | - |
| Gorilla_gorilla_gorilla_chr15 | 29327590 | 29328177 | HERVHF_pro  | - |
| Gorilla_gorilla_gorilla_chr15 | 29328255 | 29328554 | HERVHF_gag  | - |
| Gorilla_gorilla_gorilla_chr15 | 29330158 | 29330536 | HERVHF_3LTR | - |
| Gorilla_gorilla_gorilla_chr15 | 50474934 | 50475332 | HERVHF_5LTR | + |
| Gorilla_gorilla_gorilla_chr15 | 50476623 | 50477198 | HERVHF_gag  | + |
| Gorilla_gorilla_gorilla_chr15 | 50477251 | 50478153 | HERVHF_pro  | + |
| Gorilla_gorilla_gorilla_chr15 | 50477452 | 50479740 | HERVHF_pol  | + |
| Gorilla_gorilla_gorilla_chr15 | 50480175 | 50480578 | HERVHF_3LTR | + |
| Gorilla_gorilla_gorilla_chr15 | 64266971 | 64267272 | HERVHF_5LTR | - |
| Gorilla_gorilla_gorilla_chr15 | 64268650 | 64270162 | HERVHF_pol  | - |
| Gorilla_gorilla_gorilla_chr15 | 64277317 | 64277620 | HERVHF_3LTR | - |
| Gorilla_gorilla_gorilla_chr15 | 76234075 | 76234503 | HERVHF_5LTR | + |
| Gorilla_gorilla_gorilla_chr15 | 76236338 | 76236694 | HERVHF_gag  | + |

|                               |          |          |             |   |
|-------------------------------|----------|----------|-------------|---|
| Gorilla_gorilla_gorilla_chr15 | 76237545 | 76238573 | HERVHF_pol  | + |
| Gorilla_gorilla_gorilla_chr15 | 76239709 | 76240134 | HERVHF_3LTR | + |
| Gorilla_gorilla_gorilla_chr16 | 9917509  | 9917960  | HERVHF_5LTR | - |
| Gorilla_gorilla_gorilla_chr16 | 9918725  | 9920996  | HERVHF_pol  | - |
| Gorilla_gorilla_gorilla_chr16 | 9921516  | 9922043  | HERVHF_gag  | - |
| Gorilla_gorilla_gorilla_chr16 | 9923697  | 9924148  | HERVHF_3LTR | - |
| Gorilla_gorilla_gorilla_chr16 | 45460378 | 45460830 | HERVHF_5LTR | + |
| Gorilla_gorilla_gorilla_chr16 | 45462633 | 45463013 | HERVHF_gag  | + |
| Gorilla_gorilla_gorilla_chr16 | 45463060 | 45463932 | HERVHF_pro  | + |
| Gorilla_gorilla_gorilla_chr16 | 45463297 | 45465430 | HERVHF_pol  | + |
| Gorilla_gorilla_gorilla_chr16 | 45465872 | 45466324 | HERVHF_3LTR | + |
| Gorilla_gorilla_gorilla_chr16 | 50623004 | 50623460 | HERVHF_5LTR | - |
| Gorilla_gorilla_gorilla_chr16 | 50623916 | 50625778 | HERVHF_pol  | - |
| Gorilla_gorilla_gorilla_chr16 | 50625461 | 50626288 | HERVHF_pro  | - |
| Gorilla_gorilla_gorilla_chr16 | 50628109 | 50628562 | HERVHF_3LTR | - |
| Gorilla_gorilla_gorilla_chr16 | 55864374 | 55865228 | HERVHF_5LTR | - |
| Gorilla_gorilla_gorilla_chr16 | 55867090 | 55868749 | HERVHF_pol  | - |
| Gorilla_gorilla_gorilla_chr16 | 55869005 | 55869862 | HERVHF_3LTR | - |
| Gorilla_gorilla_gorilla_chr17 | 11893030 | 11893463 | HERVHF_5LTR | + |
| Gorilla_gorilla_gorilla_chr17 | 11895768 | 11896484 | HERVHF_pro  | + |
| Gorilla_gorilla_gorilla_chr17 | 11895975 | 11897245 | HERVHF_pol  | + |
| Gorilla_gorilla_gorilla_chr17 | 11897837 | 11898270 | HERVHF_3LTR | + |
| Gorilla_gorilla_gorilla_chr17 | 19653560 | 19653987 | HERVHF_5LTR | + |
| Gorilla_gorilla_gorilla_chr17 | 19656015 | 19656908 | HERVHF_gag  | + |
| Gorilla_gorilla_gorilla_chr17 | 19657107 | 19659365 | HERVHF_pol  | + |
| Gorilla_gorilla_gorilla_chr17 | 19659707 | 19660051 | HERVHF_env  | + |
| Gorilla_gorilla_gorilla_chr17 | 19660217 | 19660633 | HERVHF_3LTR | + |
| Gorilla_gorilla_gorilla_chr17 | 20180531 | 20180982 | HERVHF_5LTR | - |
| Gorilla_gorilla_gorilla_chr17 | 20181434 | 20183581 | HERVHF_pol  | - |
| Gorilla_gorilla_gorilla_chr17 | 20182970 | 20183788 | HERVHF_pro  | - |
| Gorilla_gorilla_gorilla_chr17 | 20183778 | 20184194 | HERVHF_gag  | - |
| Gorilla_gorilla_gorilla_chr17 | 20185925 | 20186376 | HERVHF_3LTR | - |
| Gorilla_gorilla_gorilla_chr17 | 42851916 | 42852378 | HERVK_5LTR  | - |
| Gorilla_gorilla_gorilla_chr17 | 42853382 | 42854851 | HERVK_pol   | - |
| Gorilla_gorilla_gorilla_chr17 | 42854909 | 42855688 | HERVK_pro   | - |
| Gorilla_gorilla_gorilla_chr17 | 42857133 | 42857604 | HERVK_3LTR  | - |
| Gorilla_gorilla_gorilla_chr17 | 73803524 | 73803971 | HERVHF_5LTR | + |
| Gorilla_gorilla_gorilla_chr17 | 73805631 | 73806047 | HERVHF_gag  | + |
| Gorilla_gorilla_gorilla_chr17 | 73806054 | 73806905 | HERVHF_pro  | + |
| Gorilla_gorilla_gorilla_chr17 | 73806246 | 73808282 | HERVHF_pol  | + |
| Gorilla_gorilla_gorilla_chr17 | 73808873 | 73809326 | HERVHF_3LTR | + |
| Gorilla_gorilla_gorilla_chr17 | 83438784 | 83439281 | HERVHF_5LTR | + |
| Gorilla_gorilla_gorilla_chr17 | 83439286 | 83440048 | HERVHF_gag  | + |
| Gorilla_gorilla_gorilla_chr17 | 83440038 | 83440886 | HERVHF_pro  | + |

|                               |          |          |             |   |
|-------------------------------|----------|----------|-------------|---|
| Gorilla_gorilla_gorilla_chr17 | 83440248 | 83442677 | HERVHF_pol  | + |
| Gorilla_gorilla_gorilla_chr17 | 83451346 | 83451849 | HERVHF_3LTR | + |
| Gorilla_gorilla_gorilla_chr17 | 91671514 | 91671943 | HERVHF_5LTR | - |
| Gorilla_gorilla_gorilla_chr17 | 91672353 | 91674509 | HERVHF_pol  | - |
| Gorilla_gorilla_gorilla_chr17 | 91673928 | 91674758 | HERVHF_pro  | - |
| Gorilla_gorilla_gorilla_chr17 | 91674768 | 91675094 | HERVHF_gag  | - |
| Gorilla_gorilla_gorilla_chr17 | 91676917 | 91677347 | HERVHF_3LTR | - |
| Gorilla_gorilla_gorilla_chr18 | 28266107 | 28266562 | HERVHF_5LTR | + |
| Gorilla_gorilla_gorilla_chr18 | 28267732 | 28268971 | HERVHF_gag  | + |
| Gorilla_gorilla_gorilla_chr18 | 28269457 | 28270268 | HERVHF_pol  | + |
| Gorilla_gorilla_gorilla_chr18 | 28271860 | 28272581 | HERVHF_env  | + |
| Gorilla_gorilla_gorilla_chr18 | 28273255 | 28273727 | HERVHF_3LTR | + |
| Gorilla_gorilla_gorilla_chr18 | 28891086 | 28891439 | HERVHF_5LTR | + |
| Gorilla_gorilla_gorilla_chr18 | 28892710 | 28893282 | HERVHF_gag  | + |
| Gorilla_gorilla_gorilla_chr18 | 28893455 | 28894309 | HERVHF_pro  | + |
| Gorilla_gorilla_gorilla_chr18 | 28893569 | 28895611 | HERVHF_pol  | + |
| Gorilla_gorilla_gorilla_chr18 | 28897013 | 28897360 | HERVHF_3LTR | + |
| Gorilla_gorilla_gorilla_chr18 | 35770933 | 35771328 | HERVHF_5LTR | + |
| Gorilla_gorilla_gorilla_chr18 | 35773097 | 35773852 | HERVHF_pro  | + |
| Gorilla_gorilla_gorilla_chr18 | 35773331 | 35775270 | HERVHF_pol  | + |
| Gorilla_gorilla_gorilla_chr18 | 35775848 | 35776245 | HERVHF_3LTR | + |
| Gorilla_gorilla_gorilla_chr18 | 36027624 | 36027983 | HERVHF_5LTR | + |
| Gorilla_gorilla_gorilla_chr18 | 36028936 | 36029259 | HERVHF_gag  | + |
| Gorilla_gorilla_gorilla_chr18 | 36029026 | 36029778 | HERVHF_pro  | + |
| Gorilla_gorilla_gorilla_chr18 | 36029678 | 36031947 | HERVHF_pol  | + |
| Gorilla_gorilla_gorilla_chr18 | 36032458 | 36032805 | HERVHF_3LTR | + |
| Gorilla_gorilla_gorilla_chr18 | 49426111 | 49426562 | HERVHF_5LTR | + |
| Gorilla_gorilla_gorilla_chr18 | 49428334 | 49428738 | HERVHF_gag  | + |
| Gorilla_gorilla_gorilla_chr18 | 49428839 | 49429555 | HERVHF_pro  | + |
| Gorilla_gorilla_gorilla_chr18 | 49429040 | 49431162 | HERVHF_pol  | + |
| Gorilla_gorilla_gorilla_chr18 | 49431566 | 49432017 | HERVHF_3LTR | + |
| Gorilla_gorilla_gorilla_chr18 | 66350160 | 66350593 | HERVHF_5LTR | + |
| Gorilla_gorilla_gorilla_chr18 | 66352334 | 66352654 | HERVHF_gag  | + |
| Gorilla_gorilla_gorilla_chr18 | 66352825 | 66353508 | HERVHF_pro  | + |
| Gorilla_gorilla_gorilla_chr18 | 66352909 | 66354880 | HERVHF_pol  | + |
| Gorilla_gorilla_gorilla_chr18 | 66355472 | 66355905 | HERVHF_3LTR | + |
| Gorilla_gorilla_gorilla_chr19 | 23324258 | 23324576 | HERVK_5LTR  | - |
| Gorilla_gorilla_gorilla_chr19 | 23325486 | 23326751 | HERVK_pol   | - |
| Gorilla_gorilla_gorilla_chr19 | 23326646 | 23327424 | HERVK_pro   | - |
| Gorilla_gorilla_gorilla_chr19 | 23328482 | 23328816 | HERVK_3LTR  | - |
| Gorilla_gorilla_gorilla_chr19 | 39699377 | 39699815 | HERVHF_5LTR | - |
| Gorilla_gorilla_gorilla_chr19 | 39700403 | 39702230 | HERVHF_pol  | - |
| Gorilla_gorilla_gorilla_chr19 | 39702651 | 39702950 | HERVHF_gag  | - |
| Gorilla_gorilla_gorilla_chr19 | 39705027 | 39705461 | HERVHF_3LTR | - |

|                               |          |          |             |   |
|-------------------------------|----------|----------|-------------|---|
| Gorilla_gorilla_gorilla_chr19 | 42499350 | 42499695 | HERVHF_5LTR | - |
| Gorilla_gorilla_gorilla_chr19 | 42499964 | 42500302 | HERVHF_env  | - |
| Gorilla_gorilla_gorilla_chr19 | 42500800 | 42504061 | HERVHF_pol  | - |
| Gorilla_gorilla_gorilla_chr19 | 42503423 | 42504178 | HERVHF_pro  | - |
| Gorilla_gorilla_gorilla_chr19 | 42506558 | 42506896 | HERVHF_3LTR | - |
| Gorilla_gorilla_gorilla_chr19 | 42667809 | 42668225 | HERVHF_5LTR | - |
| Gorilla_gorilla_gorilla_chr19 | 42668827 | 42671014 | HERVHF_pol  | - |
| Gorilla_gorilla_gorilla_chr19 | 42670376 | 42671155 | HERVHF_pro  | - |
| Gorilla_gorilla_gorilla_chr19 | 42673045 | 42673465 | HERVHF_3LTR | - |
| Gorilla_gorilla_gorilla_chr19 | 43459960 | 43460390 | HERVHF_5LTR | - |
| Gorilla_gorilla_gorilla_chr19 | 43460780 | 43462769 | HERVHF_pol  | - |
| Gorilla_gorilla_gorilla_chr19 | 43462320 | 43462853 | HERVHF_pro  | - |
| Gorilla_gorilla_gorilla_chr19 | 43463124 | 43463423 | HERVHF_gag  | - |
| Gorilla_gorilla_gorilla_chr19 | 43465062 | 43465492 | HERVHF_3LTR | - |
| Gorilla_gorilla_gorilla_chr19 | 43807862 | 43808305 | HERVHF_5LTR | + |
| Gorilla_gorilla_gorilla_chr19 | 43809709 | 43810119 | HERVHF_gag  | + |
| Gorilla_gorilla_gorilla_chr19 | 43810801 | 43812978 | HERVHF_pol  | + |
| Gorilla_gorilla_gorilla_chr19 | 43813376 | 43813819 | HERVHF_3LTR | + |
| Gorilla_gorilla_gorilla_chr20 | 12290208 | 12290537 | HERVHF_5LTR | - |
| Gorilla_gorilla_gorilla_chr20 | 12290990 | 12292946 | HERVHF_pol  | - |
| Gorilla_gorilla_gorilla_chr20 | 12293364 | 12293687 | HERVHF_gag  | - |
| Gorilla_gorilla_gorilla_chr20 | 12295740 | 12296062 | HERVHF_3LTR | - |
| Gorilla_gorilla_gorilla_chr20 | 12706987 | 12707397 | HERVHF_5LTR | + |
| Gorilla_gorilla_gorilla_chr20 | 12709090 | 12709800 | HERVHF_pro  | + |
| Gorilla_gorilla_gorilla_chr20 | 12709288 | 12711228 | HERVHF_pol  | + |
| Gorilla_gorilla_gorilla_chr20 | 12711866 | 12712280 | HERVHF_3LTR | + |
| Gorilla_gorilla_gorilla_chr20 | 13312056 | 13312509 | HERVHF_5LTR | + |
| Gorilla_gorilla_gorilla_chr20 | 13314211 | 13314534 | HERVHF_gag  | + |
| Gorilla_gorilla_gorilla_chr20 | 13314963 | 13316935 | HERVHF_pol  | + |
| Gorilla_gorilla_gorilla_chr20 | 13317340 | 13317792 | HERVHF_3LTR | + |
| Gorilla_gorilla_gorilla_chr20 | 19743841 | 19744276 | HERVHF_5LTR | - |
| Gorilla_gorilla_gorilla_chr20 | 19744693 | 19745874 | HERVHF_pol  | - |
| Gorilla_gorilla_gorilla_chr20 | 19745383 | 19746207 | HERVHF_pro  | - |
| Gorilla_gorilla_gorilla_chr20 | 19748276 | 19748705 | HERVHF_3LTR | - |
| Gorilla_gorilla_gorilla_chr20 | 36017199 | 36017655 | HERVHF_5LTR | + |
| Gorilla_gorilla_gorilla_chr20 | 36019963 | 36020715 | HERVHF_pro  | + |
| Gorilla_gorilla_gorilla_chr20 | 36020380 | 36022266 | HERVHF_pol  | + |
| Gorilla_gorilla_gorilla_chr20 | 36022675 | 36023126 | HERVHF_3LTR | + |
| Gorilla_gorilla_gorilla_chr20 | 36198983 | 36199445 | HERVHF_5LTR | + |
| Gorilla_gorilla_gorilla_chr20 | 36201336 | 36201635 | HERVHF_gag  | + |
| Gorilla_gorilla_gorilla_chr20 | 36201662 | 36202492 | HERVHF_pro  | + |
| Gorilla_gorilla_gorilla_chr20 | 36201950 | 36204047 | HERVHF_pol  | + |
| Gorilla_gorilla_gorilla_chr20 | 36204457 | 36204914 | HERVHF_3LTR | + |
| Gorilla_gorilla_gorilla_chr21 | 3216438  | 3216752  | HERVHF_5LTR | + |

|                               |          |          |             |   |
|-------------------------------|----------|----------|-------------|---|
| Gorilla_gorilla_gorilla_chr21 | 3218125  | 3218559  | HERVHF_gag  | + |
| Gorilla_gorilla_gorilla_chr21 | 3218754  | 3219482  | HERVHF_pro  | + |
| Gorilla_gorilla_gorilla_chr21 | 3219102  | 3221425  | HERVHF_pol  | + |
| Gorilla_gorilla_gorilla_chr21 | 3221868  | 3222195  | HERVHF_3LTR | + |
| Gorilla_gorilla_gorilla_chr21 | 12740363 | 12740780 | HERVHF_5LTR | - |
| Gorilla_gorilla_gorilla_chr21 | 12741178 | 12743548 | HERVHF_pol  | - |
| Gorilla_gorilla_gorilla_chr21 | 12743884 | 12744234 | HERVHF_gag  | - |
| Gorilla_gorilla_gorilla_chr21 | 12745598 | 12746010 | HERVHF_3LTR | - |
| Gorilla_gorilla_gorilla_chr21 | 27458488 | 27458939 | HERVHF_5LTR | + |
| Gorilla_gorilla_gorilla_chr21 | 27460685 | 27461095 | HERVHF_gag  | + |
| Gorilla_gorilla_gorilla_chr21 | 27461101 | 27461637 | HERVHF_pro  | + |
| Gorilla_gorilla_gorilla_chr21 | 27461574 | 27463510 | HERVHF_pol  | + |
| Gorilla_gorilla_gorilla_chr21 | 27463540 | 27463901 | HERVHF_env  | + |
| Gorilla_gorilla_gorilla_chr21 | 27463913 | 27464365 | HERVHF_3LTR | + |
| Gorilla_gorilla_gorilla_chr21 | 29296549 | 29296995 | HERVHF_5LTR | - |
| Gorilla_gorilla_gorilla_chr21 | 29297416 | 29299778 | HERVHF_pol  | - |
| Gorilla_gorilla_gorilla_chr21 | 29301852 | 29302299 | HERVHF_3LTR | - |
| Gorilla_gorilla_gorilla_chr22 | 16021673 | 16022106 | HERVHF_5LTR | + |
| Gorilla_gorilla_gorilla_chr22 | 16023929 | 16024228 | HERVHF_gag  | + |
| Gorilla_gorilla_gorilla_chr22 | 16024719 | 16026233 | HERVHF_pol  | + |
| Gorilla_gorilla_gorilla_chr22 | 16027060 | 16027492 | HERVHF_3LTR | + |
| Gorilla_gorilla_gorilla_chr2a | 28001034 | 28001463 | HERVHF_5LTR | - |
| Gorilla_gorilla_gorilla_chr2a | 28001915 | 28004046 | HERVHF_pol  | - |
| Gorilla_gorilla_gorilla_chr2a | 28003818 | 28004264 | HERVHF_pro  | - |
| Gorilla_gorilla_gorilla_chr2a | 28004298 | 28004702 | HERVHF_gag  | - |
| Gorilla_gorilla_gorilla_chr2a | 28006282 | 28006713 | HERVHF_3LTR | - |
| Gorilla_gorilla_gorilla_chr2a | 34762117 | 34762546 | HERVHF_5LTR | + |
| Gorilla_gorilla_gorilla_chr2a | 34764594 | 34764974 | HERVHF_gag  | + |
| Gorilla_gorilla_gorilla_chr2a | 34764993 | 34765814 | HERVHF_pro  | + |
| Gorilla_gorilla_gorilla_chr2a | 34765257 | 34767539 | HERVHF_pol  | + |
| Gorilla_gorilla_gorilla_chr2a | 34767987 | 34768417 | HERVHF_3LTR | + |
| Gorilla_gorilla_gorilla_chr2a | 34835979 | 34836310 | HERVHF_5LTR | + |
| Gorilla_gorilla_gorilla_chr2a | 34837988 | 34838812 | HERVHF_pro  | + |
| Gorilla_gorilla_gorilla_chr2a | 34838195 | 34838962 | HERVHF_pol  | + |
| Gorilla_gorilla_gorilla_chr2a | 34842390 | 34842717 | HERVHF_3LTR | + |
| Gorilla_gorilla_gorilla_chr2a | 35276403 | 35276809 | HERVHF_5LTR | - |
| Gorilla_gorilla_gorilla_chr2a | 35277258 | 35279286 | HERVHF_pol  | - |
| Gorilla_gorilla_gorilla_chr2a | 35278882 | 35279457 | HERVHF_pro  | - |
| Gorilla_gorilla_gorilla_chr2a | 35279826 | 35280125 | HERVHF_gag  | - |
| Gorilla_gorilla_gorilla_chr2a | 35281869 | 35282273 | HERVHF_3LTR | - |
| Gorilla_gorilla_gorilla_chr2a | 36119166 | 36119536 | HUERSP_5LTR | + |
| Gorilla_gorilla_gorilla_chr2a | 36122602 | 36123012 | HUERSP_pro  | + |
| Gorilla_gorilla_gorilla_chr2a | 36122629 | 36126140 | HUERSP_pol  | + |
| Gorilla_gorilla_gorilla_chr2a | 36129236 | 36129612 | HUERSP_3LTR | + |

|                               |          |          |             |   |
|-------------------------------|----------|----------|-------------|---|
| Gorilla_gorilla_gorilla_chr2a | 39725352 | 39725795 | HERVHF_5LTR | - |
| Gorilla_gorilla_gorilla_chr2a | 39726679 | 39728642 | HERVHF_pol  | - |
| Gorilla_gorilla_gorilla_chr2a | 39728082 | 39728894 | HERVHF_pro  | - |
| Gorilla_gorilla_gorilla_chr2a | 39728918 | 39729223 | HERVHF_gag  | - |
| Gorilla_gorilla_gorilla_chr2a | 39731722 | 39732174 | HERVHF_3LTR | - |
| Gorilla_gorilla_gorilla_chr2a | 45628265 | 45628737 | HERVHF_5LTR | - |
| Gorilla_gorilla_gorilla_chr2a | 45629154 | 45630432 | HERVHF_pol  | - |
| Gorilla_gorilla_gorilla_chr2a | 45629851 | 45630681 | HERVHF_pro  | - |
| Gorilla_gorilla_gorilla_chr2a | 45630708 | 45631007 | HERVHF_gag  | - |
| Gorilla_gorilla_gorilla_chr2a | 45632756 | 45633229 | HERVHF_3LTR | - |
| Gorilla_gorilla_gorilla_chr2a | 47902222 | 47902579 | HERVHF_5LTR | + |
| Gorilla_gorilla_gorilla_chr2a | 47904633 | 47905409 | HERVHF_pro  | + |
| Gorilla_gorilla_gorilla_chr2a | 47904852 | 47907012 | HERVHF_pol  | + |
| Gorilla_gorilla_gorilla_chr2a | 47907489 | 47907846 | HERVHF_3LTR | + |
| Gorilla_gorilla_gorilla_chr2a | 49308854 | 49309327 | HERVK_5LTR  | - |
| Gorilla_gorilla_gorilla_chr2a | 49309491 | 49309844 | HERVK_env   | - |
| Gorilla_gorilla_gorilla_chr2a | 49310449 | 49311249 | HERVK_pol   | - |
| Gorilla_gorilla_gorilla_chr2a | 49311037 | 49312311 | HERVK_pro   | - |
| Gorilla_gorilla_gorilla_chr2a | 49312085 | 49313126 | HERVK_gag   | - |
| Gorilla_gorilla_gorilla_chr2a | 49313550 | 49314013 | HERVK_3LTR  | - |
| Gorilla_gorilla_gorilla_chr2a | 64759050 | 64759480 | HERVHF_5LTR | - |
| Gorilla_gorilla_gorilla_chr2a | 64759649 | 64760092 | HERVHF_env  | - |
| Gorilla_gorilla_gorilla_chr2a | 64760410 | 64763483 | HERVHF_pol  | - |
| Gorilla_gorilla_gorilla_chr2a | 64763530 | 64764336 | HERVHF_pro  | - |
| Gorilla_gorilla_gorilla_chr2a | 64764737 | 64765708 | HERVHF_gag  | - |
| Gorilla_gorilla_gorilla_chr2a | 64766488 | 64766919 | HERVHF_3LTR | - |
| Gorilla_gorilla_gorilla_chr2a | 69646045 | 69646475 | HERVHF_5LTR | - |
| Gorilla_gorilla_gorilla_chr2a | 69647079 | 69649117 | HERVHF_pol  | - |
| Gorilla_gorilla_gorilla_chr2a | 69648479 | 69649228 | HERVHF_pro  | - |
| Gorilla_gorilla_gorilla_chr2a | 69649315 | 69649728 | HERVHF_gag  | - |
| Gorilla_gorilla_gorilla_chr2a | 69651522 | 69651952 | HERVHF_3LTR | - |
| Gorilla_gorilla_gorilla_chr2a | 70840472 | 70840907 | HERVHF_5LTR | + |
| Gorilla_gorilla_gorilla_chr2a | 70842986 | 70843588 | HERVHF_pro  | + |
| Gorilla_gorilla_gorilla_chr2a | 70842989 | 70845109 | HERVHF_pol  | + |
| Gorilla_gorilla_gorilla_chr2a | 70845737 | 70846165 | HERVHF_3LTR | + |
| Gorilla_gorilla_gorilla_chr2a | 86196870 | 86197279 | HERVHF_5LTR | - |
| Gorilla_gorilla_gorilla_chr2a | 86197730 | 86199755 | HERVHF_pol  | - |
| Gorilla_gorilla_gorilla_chr2a | 86199776 | 86200231 | HERVHF_pro  | - |
| Gorilla_gorilla_gorilla_chr2a | 86200191 | 86200520 | HERVHF_gag  | - |
| Gorilla_gorilla_gorilla_chr2a | 86201975 | 86202389 | HERVHF_3LTR | - |
| Gorilla_gorilla_gorilla_chr2a | 93101844 | 93102308 | HERVHF_5LTR | + |
| Gorilla_gorilla_gorilla_chr2a | 93103978 | 93104349 | HERVHF_gag  | + |
| Gorilla_gorilla_gorilla_chr2a | 93104488 | 93105228 | HERVHF_pro  | + |
| Gorilla_gorilla_gorilla_chr2a | 93104584 | 93107028 | HERVHF_pol  | + |

|                               |          |          |             |   |
|-------------------------------|----------|----------|-------------|---|
| Gorilla_gorilla_gorilla_chr2a | 93107418 | 93107899 | HERVHF_3LTR | + |
| Gorilla_gorilla_gorilla_chr2a | 93638163 | 93638615 | HERVHF_5LTR | - |
| Gorilla_gorilla_gorilla_chr2a | 93639130 | 93641003 | HERVHF_pol  | - |
| Gorilla_gorilla_gorilla_chr2a | 93640596 | 93641126 | HERVHF_pro  | - |
| Gorilla_gorilla_gorilla_chr2a | 93641458 | 93641838 | HERVHF_gag  | - |
| Gorilla_gorilla_gorilla_chr2a | 93643764 | 93644214 | HERVHF_3LTR | - |
| Gorilla_gorilla_gorilla_chr2a | 98424328 | 98424729 | HERVHF_5LTR | + |
| Gorilla_gorilla_gorilla_chr2a | 98426945 | 98427883 | HERVHF_pro  | + |
| Gorilla_gorilla_gorilla_chr2a | 98427155 | 98429293 | HERVHF_pol  | + |
| Gorilla_gorilla_gorilla_chr2a | 98429262 | 98429573 | HERVHF_env  | + |
| Gorilla_gorilla_gorilla_chr2a | 98429784 | 98430174 | HERVHF_3LTR | + |
| Gorilla_gorilla_gorilla_chr2b | 36404606 | 36405072 | HERVHF_5LTR | + |
| Gorilla_gorilla_gorilla_chr2b | 36407185 | 36407748 | HERVHF_pro  | + |
| Gorilla_gorilla_gorilla_chr2b | 36407215 | 36409540 | HERVHF_pol  | + |
| Gorilla_gorilla_gorilla_chr2b | 36409928 | 36410369 | HERVHF_3LTR | + |
| Gorilla_gorilla_gorilla_chr2b | 41145474 | 41145975 | HERVHF_5LTR | + |
| Gorilla_gorilla_gorilla_chr2b | 41148463 | 41149652 | HERVHF_pol  | + |
| Gorilla_gorilla_gorilla_chr2b | 41151300 | 41152112 | HERVHF_env  | + |
| Gorilla_gorilla_gorilla_chr2b | 41152339 | 41152846 | HERVHF_3LTR | + |
| Gorilla_gorilla_gorilla_chr2b | 50559274 | 50559724 | HERVHF_5LTR | + |
| Gorilla_gorilla_gorilla_chr2b | 50561795 | 50562628 | HERVHF_pro  | + |
| Gorilla_gorilla_gorilla_chr2b | 50561990 | 50564167 | HERVHF_pol  | + |
| Gorilla_gorilla_gorilla_chr2b | 50564582 | 50565037 | HERVHF_3LTR | + |
| Gorilla_gorilla_gorilla_chr2b | 73942677 | 73943058 | HERVHF_5LTR | - |
| Gorilla_gorilla_gorilla_chr2b | 73943378 | 73944202 | HERVHF_env  | - |
| Gorilla_gorilla_gorilla_chr2b | 73946048 | 73948218 | HERVHF_pol  | - |
| Gorilla_gorilla_gorilla_chr2b | 73947637 | 73948269 | HERVHF_pro  | - |
| Gorilla_gorilla_gorilla_chr2b | 73948496 | 73948876 | HERVHF_gag  | - |
| Gorilla_gorilla_gorilla_chr2b | 73950453 | 73950844 | HERVHF_3LTR | - |
| Gorilla_gorilla_gorilla_chr2b | 74577720 | 74578132 | HERVHF_5LTR | - |
| Gorilla_gorilla_gorilla_chr2b | 74579132 | 74581295 | HERVHF_pol  | - |
| Gorilla_gorilla_gorilla_chr2b | 74580678 | 74581490 | HERVHF_pro  | - |
| Gorilla_gorilla_gorilla_chr2b | 74583366 | 74583780 | HERVHF_3LTR | - |
| Gorilla_gorilla_gorilla_chr2b | 78541154 | 78541587 | HERVHF_5LTR | + |
| Gorilla_gorilla_gorilla_chr2b | 78542615 | 78543022 | HERVHF_gag  | + |
| Gorilla_gorilla_gorilla_chr2b | 78542840 | 78543986 | HERVHF_pro  | + |
| Gorilla_gorilla_gorilla_chr2b | 78543447 | 78545350 | HERVHF_pol  | + |
| Gorilla_gorilla_gorilla_chr2b | 78545923 | 78546370 | HERVHF_3LTR | + |
| Gorilla_gorilla_gorilla_chr2b | 78912263 | 78912678 | HERVHF_5LTR | + |
| Gorilla_gorilla_gorilla_chr2b | 78913609 | 78916076 | HERVHF_gag  | + |
| Gorilla_gorilla_gorilla_chr2b | 78916390 | 78916941 | HERVHF_pro  | + |
| Gorilla_gorilla_gorilla_chr2b | 78916564 | 78918504 | HERVHF_pol  | + |
| Gorilla_gorilla_gorilla_chr2b | 78918955 | 78919370 | HERVHF_3LTR | + |
| Gorilla_gorilla_gorilla_chr2b | 83899982 | 83900345 | HERVHF_5LTR | + |

|                               |           |           |             |   |
|-------------------------------|-----------|-----------|-------------|---|
| Gorilla_gorilla_gorilla_chr2b | 83902218  | 83902688  | HERVHF_pro  | + |
| Gorilla_gorilla_gorilla_chr2b | 83903006  | 83905024  | HERVHF_pol  | + |
| Gorilla_gorilla_gorilla_chr2b | 83907599  | 83908732  | HERVHF_env  | + |
| Gorilla_gorilla_gorilla_chr2b | 83908959  | 83909315  | HERVHF_3LTR | + |
| Gorilla_gorilla_gorilla_chr2b | 93529319  | 93529730  | HERVHF_5LTR | + |
| Gorilla_gorilla_gorilla_chr2b | 93532177  | 93533927  | HERVHF_pol  | + |
| Gorilla_gorilla_gorilla_chr2b | 93534968  | 93535381  | HERVHF_3LTR | + |
| Gorilla_gorilla_gorilla_chr2b | 95607061  | 95607458  | HERVHF_5LTR | + |
| Gorilla_gorilla_gorilla_chr2b | 95609230  | 95609550  | HERVHF_gag  | + |
| Gorilla_gorilla_gorilla_chr2b | 95609974  | 95612090  | HERVHF_pol  | + |
| Gorilla_gorilla_gorilla_chr2b | 95612926  | 95613310  | HERVHF_3LTR | + |
| Gorilla_gorilla_gorilla_chr2b | 95816830  | 95817130  | HERVHF_5LTR | + |
| Gorilla_gorilla_gorilla_chr2b | 95819442  | 95820260  | HERVHF_pro  | + |
| Gorilla_gorilla_gorilla_chr2b | 95819739  | 95821800  | HERVHF_pol  | + |
| Gorilla_gorilla_gorilla_chr2b | 95822222  | 95822526  | HERVHF_3LTR | + |
| Gorilla_gorilla_gorilla_chr2b | 101393468 | 101393941 | HERVHF_5LTR | - |
| Gorilla_gorilla_gorilla_chr2b | 101394352 | 101396909 | HERVHF_pol  | - |
| Gorilla_gorilla_gorilla_chr2b | 101396346 | 101397152 | HERVHF_pro  | - |
| Gorilla_gorilla_gorilla_chr2b | 101397207 | 101397616 | HERVHF_gag  | - |
| Gorilla_gorilla_gorilla_chr2b | 101399420 | 101399888 | HERVHF_3LTR | - |
| Gorilla_gorilla_gorilla_chr2b | 101651096 | 101651432 | HERVHF_5LTR | + |
| Gorilla_gorilla_gorilla_chr2b | 101652839 | 101653195 | HERVHF_gag  | + |
| Gorilla_gorilla_gorilla_chr2b | 101653499 | 101655661 | HERVHF_pol  | + |
| Gorilla_gorilla_gorilla_chr2b | 101656815 | 101657155 | HERVHF_3LTR | + |
| Gorilla_gorilla_gorilla_chr2b | 102494801 | 102495258 | HERVHF_5LTR | + |
| Gorilla_gorilla_gorilla_chr2b | 102497012 | 102497332 | HERVHF_gag  | + |
| Gorilla_gorilla_gorilla_chr2b | 102497420 | 102498169 | HERVHF_pro  | + |
| Gorilla_gorilla_gorilla_chr2b | 102497627 | 102499709 | HERVHF_pol  | + |
| Gorilla_gorilla_gorilla_chr2b | 102500161 | 102500614 | HERVHF_3LTR | + |
| Gorilla_gorilla_gorilla_chr2b | 110917816 | 110918228 | HERVHF_5LTR | + |
| Gorilla_gorilla_gorilla_chr2b | 110919912 | 110920319 | HERVHF_gag  | + |
| Gorilla_gorilla_gorilla_chr2b | 110920828 | 110922724 | HERVHF_pol  | + |
| Gorilla_gorilla_gorilla_chr2b | 110923107 | 110923532 | HERVHF_3LTR | + |
| Gorilla_gorilla_gorilla_chr3  | 941721    | 942135    | HERVHF_5LTR | - |
| Gorilla_gorilla_gorilla_chr3  | 942589    | 944763    | HERVHF_pol  | - |
| Gorilla_gorilla_gorilla_chr3  | 944125    | 944958    | HERVHF_pro  | - |
| Gorilla_gorilla_gorilla_chr3  | 944991    | 945500    | HERVHF_gag  | - |
| Gorilla_gorilla_gorilla_chr3  | 947026    | 947440    | HERVHF_3LTR | - |
| Gorilla_gorilla_gorilla_chr3  | 8235459   | 8235871   | HERVHF_5LTR | + |
| Gorilla_gorilla_gorilla_chr3  | 8237514   | 8237897   | HERVHF_gag  | + |
| Gorilla_gorilla_gorilla_chr3  | 8238171   | 8238752   | HERVHF_pro  | + |
| Gorilla_gorilla_gorilla_chr3  | 8238312   | 8240162   | HERVHF_pol  | + |
| Gorilla_gorilla_gorilla_chr3  | 8240734   | 8241145   | HERVHF_3LTR | + |
| Gorilla_gorilla_gorilla_chr3  | 21293393  | 21293800  | HERVHF_5LTR | - |



|                              |           |           |               |   |
|------------------------------|-----------|-----------|---------------|---|
| Gorilla_gorilla_gorilla_chr3 | 21294236  | 21296411  | HERVHF_pol    | - |
| Gorilla_gorilla_gorilla_chr3 | 21296825  | 21297166  | HERVHF_gag    | - |
| Gorilla_gorilla_gorilla_chr3 | 21298167  | 21298570  | HERVHF_3LTR   | - |
| Gorilla_gorilla_gorilla_chr3 | 32590515  | 32590859  | HERVHF_5LTR   | - |
| Gorilla_gorilla_gorilla_chr3 | 32591682  | 32593997  | HERVHF_pol    | - |
| Gorilla_gorilla_gorilla_chr3 | 32593359  | 32594201  | HERVHF_pro    | - |
| Gorilla_gorilla_gorilla_chr3 | 32594191  | 32594631  | HERVHF_gag    | - |
| Gorilla_gorilla_gorilla_chr3 | 32596053  | 32596393  | HERVHF_3LTR   | - |
| Gorilla_gorilla_gorilla_chr3 | 36049346  | 36049678  | HERVHF_5LTR   | - |
| Gorilla_gorilla_gorilla_chr3 | 36050294  | 36052009  | HERVHF_pol    | - |
| Gorilla_gorilla_gorilla_chr3 | 36051692  | 36052471  | HERVHF_pro    | - |
| Gorilla_gorilla_gorilla_chr3 | 36052538  | 36052957  | HERVHF_gag    | - |
| Gorilla_gorilla_gorilla_chr3 | 36054559  | 36054892  | HERVHF_3LTR   | - |
| Gorilla_gorilla_gorilla_chr3 | 46413391  | 46413847  | HERVHF_5LTR   | - |
| Gorilla_gorilla_gorilla_chr3 | 46414378  | 46416393  | HERVHF_pol    | - |
| Gorilla_gorilla_gorilla_chr3 | 46418893  | 46419347  | HERVHF_3LTR   | - |
| Gorilla_gorilla_gorilla_chr3 | 46554275  | 46554715  | HERVHF_5LTR   | - |
| Gorilla_gorilla_gorilla_chr3 | 46554884  | 46555258  | HERVHF_env    | - |
| Gorilla_gorilla_gorilla_chr3 | 46556180  | 46557453  | HERVHF_pol    | - |
| Gorilla_gorilla_gorilla_chr3 | 46559554  | 46559995  | HERVHF_3LTR   | - |
| Gorilla_gorilla_gorilla_chr3 | 78395143  | 78395594  | HERVHF_5LTR   | + |
| Gorilla_gorilla_gorilla_chr3 | 78398102  | 78398683  | HERVHF_pro    | + |
| Gorilla_gorilla_gorilla_chr3 | 78398141  | 78400274  | HERVHF_pol    | + |
| Gorilla_gorilla_gorilla_chr3 | 78400678  | 78401130  | HERVHF_3LTR   | + |
| Gorilla_gorilla_gorilla_chr3 | 87672090  | 87672411  | HERVHF_5LTR   | + |
| Gorilla_gorilla_gorilla_chr3 | 87674251  | 87674694  | HERVHF_pro    | + |
| Gorilla_gorilla_gorilla_chr3 | 87674643  | 87676801  | HERVHF_pol    | + |
| Gorilla_gorilla_gorilla_chr3 | 87677235  | 87677579  | HERVHF_env    | + |
| Gorilla_gorilla_gorilla_chr3 | 87677823  | 87678127  | HERVHF_3LTR   | + |
| Gorilla_gorilla_gorilla_chr3 | 91536924  | 91537306  | HERVHF_5LTR   | + |
| Gorilla_gorilla_gorilla_chr3 | 91538813  | 91539154  | HERVHF_gag    | + |
| Gorilla_gorilla_gorilla_chr3 | 91539161  | 91539952  | HERVHF_pro    | + |
| Gorilla_gorilla_gorilla_chr3 | 91539455  | 91541825  | HERVHF_pol    | + |
| Gorilla_gorilla_gorilla_chr3 | 91542539  | 91542933  | HERVHF_3LTR   | + |
| Gorilla_gorilla_gorilla_chr3 | 102058053 | 102058488 | HERVHF_5LTR   | - |
| Gorilla_gorilla_gorilla_chr3 | 102058899 | 102061011 | HERVHF_pol    | - |
| Gorilla_gorilla_gorilla_chr3 | 102060469 | 102061290 | HERVHF_pro    | - |
| Gorilla_gorilla_gorilla_chr3 | 102061297 | 102061710 | HERVHF_gag    | - |
| Gorilla_gorilla_gorilla_chr3 | 102063378 | 102063812 | HERVHF_3LTR   | - |
| Gorilla_gorilla_gorilla_chr3 | 103219442 | 103219856 | HSERVIII_5LTR | - |
| Gorilla_gorilla_gorilla_chr3 | 103220525 | 103223475 | HSERVIII_pol  | - |
| Gorilla_gorilla_gorilla_chr3 | 103225903 | 103226314 | HSERVIII_3LTR | - |
| Gorilla_gorilla_gorilla_chr3 | 110062920 | 110063374 | HERVHF_5LTR   | - |
| Gorilla_gorilla_gorilla_chr3 | 110063705 | 110065036 | HERVHF_pol    | - |

|                              |           |           |             |   |
|------------------------------|-----------|-----------|-------------|---|
| Gorilla_gorilla_gorilla_chr3 | 110064521 | 110065243 | HERVHF_pro  | - |
| Gorilla_gorilla_gorilla_chr3 | 110067372 | 110067828 | HERVHF_3LTR | - |
| Gorilla_gorilla_gorilla_chr3 | 113446881 | 113447334 | HERVHF_5LTR | - |
| Gorilla_gorilla_gorilla_chr3 | 113447928 | 113449868 | HERVHF_pol  | - |
| Gorilla_gorilla_gorilla_chr3 | 113449305 | 113450075 | HERVHF_pro  | - |
| Gorilla_gorilla_gorilla_chr3 | 113450163 | 113450483 | HERVHF_gag  | - |
| Gorilla_gorilla_gorilla_chr3 | 113452222 | 113452674 | HERVHF_3LTR | - |
| Gorilla_gorilla_gorilla_chr3 | 122391329 | 122391662 | HERVHF_5LTR | - |
| Gorilla_gorilla_gorilla_chr3 | 122392072 | 122394236 | HERVHF_pol  | - |
| Gorilla_gorilla_gorilla_chr3 | 122393634 | 122394347 | HERVHF_pro  | - |
| Gorilla_gorilla_gorilla_chr3 | 122396607 | 122396945 | HERVHF_3LTR | - |
| Gorilla_gorilla_gorilla_chr3 | 126316470 | 126316829 | HERVHF_5LTR | - |
| Gorilla_gorilla_gorilla_chr3 | 126317370 | 126319079 | HERVHF_pol  | - |
| Gorilla_gorilla_gorilla_chr3 | 126318654 | 126319253 | HERVHF_pro  | - |
| Gorilla_gorilla_gorilla_chr3 | 126323212 | 126323570 | HERVHF_3LTR | - |
| Gorilla_gorilla_gorilla_chr3 | 127536111 | 127536539 | HERVHF_5LTR | + |
| Gorilla_gorilla_gorilla_chr3 | 127539129 | 127541106 | HERVHF_pol  | + |
| Gorilla_gorilla_gorilla_chr3 | 127541525 | 127541948 | HERVHF_3LTR | + |
| Gorilla_gorilla_gorilla_chr3 | 135024275 | 135024737 | HERVHF_5LTR | + |
| Gorilla_gorilla_gorilla_chr3 | 135025985 | 135026586 | HERVHF_gag  | + |
| Gorilla_gorilla_gorilla_chr3 | 135026598 | 135027386 | HERVHF_pro  | + |
| Gorilla_gorilla_gorilla_chr3 | 135026889 | 135029092 | HERVHF_pol  | + |
| Gorilla_gorilla_gorilla_chr3 | 135029350 | 135029807 | HERVHF_3LTR | + |
| Gorilla_gorilla_gorilla_chr3 | 141242173 | 141242522 | HERVHF_5LTR | + |
| Gorilla_gorilla_gorilla_chr3 | 141244054 | 141244353 | HERVHF_gag  | + |
| Gorilla_gorilla_gorilla_chr3 | 141244700 | 141248314 | HERVHF_pol  | + |
| Gorilla_gorilla_gorilla_chr3 | 141248736 | 141249884 | HERVHF_env  | + |
| Gorilla_gorilla_gorilla_chr3 | 141250145 | 141250490 | HERVHF_3LTR | + |
| Gorilla_gorilla_gorilla_chr3 | 145849261 | 145849717 | HERVHF_5LTR | + |
| Gorilla_gorilla_gorilla_chr3 | 145851887 | 145852693 | HERVHF_pro  | + |
| Gorilla_gorilla_gorilla_chr3 | 145852178 | 145854119 | HERVHF_pol  | + |
| Gorilla_gorilla_gorilla_chr3 | 145854706 | 145855158 | HERVHF_3LTR | + |
| Gorilla_gorilla_gorilla_chr3 | 150041098 | 150041530 | HERVHF_5LTR | + |
| Gorilla_gorilla_gorilla_chr3 | 150043054 | 150043578 | HERVHF_gag  | + |
| Gorilla_gorilla_gorilla_chr3 | 150044026 | 150044910 | HERVHF_pro  | + |
| Gorilla_gorilla_gorilla_chr3 | 150044314 | 150046435 | HERVHF_pol  | + |
| Gorilla_gorilla_gorilla_chr3 | 150046823 | 150047244 | HERVHF_3LTR | + |
| Gorilla_gorilla_gorilla_chr3 | 152714060 | 152714476 | HERVHF_5LTR | - |
| Gorilla_gorilla_gorilla_chr3 | 152715562 | 152717779 | HERVHF_pol  | - |
| Gorilla_gorilla_gorilla_chr3 | 152717237 | 152718016 | HERVHF_pro  | - |
| Gorilla_gorilla_gorilla_chr3 | 152718069 | 152718647 | HERVHF_gag  | - |
| Gorilla_gorilla_gorilla_chr3 | 152720129 | 152720538 | HERVHF_3LTR | - |
| Gorilla_gorilla_gorilla_chr3 | 164816066 | 164816375 | HERVHF_5LTR | + |
| Gorilla_gorilla_gorilla_chr3 | 164818131 | 164818442 | HERVHF_gag  | + |

|                              |           |           |             |   |
|------------------------------|-----------|-----------|-------------|---|
| Gorilla_gorilla_gorilla_chr3 | 164818892 | 164820258 | HERVHF_pol  | + |
| Gorilla_gorilla_gorilla_chr3 | 164821492 | 164821798 | HERVHF_3LTR | + |
| Gorilla_gorilla_gorilla_chr3 | 175062278 | 175062734 | HERVHF_5LTR | - |
| Gorilla_gorilla_gorilla_chr3 | 175063190 | 175065361 | HERVHF_pol  | - |
| Gorilla_gorilla_gorilla_chr3 | 175064726 | 175065553 | HERVHF_pro  | - |
| Gorilla_gorilla_gorilla_chr3 | 175065580 | 175065879 | HERVHF_gag  | - |
| Gorilla_gorilla_gorilla_chr3 | 175067289 | 175067743 | HERVHF_3LTR | - |
| Gorilla_gorilla_gorilla_chr3 | 175602405 | 175602825 | HERVHF_5LTR | + |
| Gorilla_gorilla_gorilla_chr3 | 175604720 | 175605061 | HERVHF_gag  | + |
| Gorilla_gorilla_gorilla_chr3 | 175605133 | 175605909 | HERVHF_pro  | + |
| Gorilla_gorilla_gorilla_chr3 | 175605355 | 175607358 | HERVHF_pol  | + |
| Gorilla_gorilla_gorilla_chr3 | 175608196 | 175609061 | HERVHF_env  | + |
| Gorilla_gorilla_gorilla_chr3 | 175609285 | 175609704 | HERVHF_3LTR | + |
| Gorilla_gorilla_gorilla_chr3 | 176903649 | 176904060 | HERVHF_5LTR | + |
| Gorilla_gorilla_gorilla_chr3 | 176905915 | 176906628 | HERVHF_pro  | + |
| Gorilla_gorilla_gorilla_chr3 | 176906204 | 176907495 | HERVHF_pol  | + |
| Gorilla_gorilla_gorilla_chr3 | 176908661 | 176909073 | HERVHF_3LTR | + |
| Gorilla_gorilla_gorilla_chr3 | 184046467 | 184046867 | HERVHF_5LTR | + |
| Gorilla_gorilla_gorilla_chr3 | 184048512 | 184049072 | HERVHF_gag  | + |
| Gorilla_gorilla_gorilla_chr3 | 184049480 | 184051199 | HERVHF_pol  | + |
| Gorilla_gorilla_gorilla_chr3 | 184051999 | 184052405 | HERVHF_3LTR | + |
| Gorilla_gorilla_gorilla_chr3 | 190436813 | 190437227 | HERVHF_5LTR | + |
| Gorilla_gorilla_gorilla_chr3 | 190438652 | 190439206 | HERVHF_gag  | + |
| Gorilla_gorilla_gorilla_chr3 | 190439681 | 190441604 | HERVHF_pol  | + |
| Gorilla_gorilla_gorilla_chr3 | 190442053 | 190442463 | HERVHF_3LTR | + |
| Gorilla_gorilla_gorilla_chr4 | 8486734   | 8487186   | HERVHF_5LTR | - |
| Gorilla_gorilla_gorilla_chr4 | 8488422   | 8489849   | HERVHF_pol  | - |
| Gorilla_gorilla_gorilla_chr4 | 8489828   | 8490364   | HERVHF_pro  | - |
| Gorilla_gorilla_gorilla_chr4 | 8490377   | 8490694   | HERVHF_gag  | - |
| Gorilla_gorilla_gorilla_chr4 | 8492546   | 8492997   | HERVHF_3LTR | - |
| Gorilla_gorilla_gorilla_chr4 | 11504681  | 11505032  | HERVHF_5LTR | + |
| Gorilla_gorilla_gorilla_chr4 | 11506587  | 11506982  | HERVHF_gag  | + |
| Gorilla_gorilla_gorilla_chr4 | 11507032  | 11507865  | HERVHF_pro  | + |
| Gorilla_gorilla_gorilla_chr4 | 11507371  | 11509447  | HERVHF_pol  | + |
| Gorilla_gorilla_gorilla_chr4 | 11509919  | 11510262  | HERVHF_3LTR | + |
| Gorilla_gorilla_gorilla_chr4 | 12058174  | 12058561  | HERVHF_5LTR | + |
| Gorilla_gorilla_gorilla_chr4 | 12060188  | 12060499  | HERVHF_gag  | + |
| Gorilla_gorilla_gorilla_chr4 | 12060536  | 12061387  | HERVHF_pro  | + |
| Gorilla_gorilla_gorilla_chr4 | 12060728  | 12062976  | HERVHF_pol  | + |
| Gorilla_gorilla_gorilla_chr4 | 12063588  | 12063959  | HERVHF_3LTR | + |
| Gorilla_gorilla_gorilla_chr4 | 13868398  | 13868849  | HERVHF_5LTR | - |
| Gorilla_gorilla_gorilla_chr4 | 13869807  | 13871801  | HERVHF_pol  | - |
| Gorilla_gorilla_gorilla_chr4 | 13871803  | 13872543  | HERVHF_pro  | - |
| Gorilla_gorilla_gorilla_chr4 | 13872328  | 13872627  | HERVHF_gag  | - |

|                              |                   |             |   |
|------------------------------|-------------------|-------------|---|
| Gorilla_gorilla_gorilla_chr4 | 13873952 13874403 | HERVHF_3LTR | - |
| Gorilla_gorilla_gorilla_chr4 | 23378988 23379439 | HERVHF_5LTR | - |
| Gorilla_gorilla_gorilla_chr4 | 23379773 23380966 | HERVHF_pol  | - |
| Gorilla_gorilla_gorilla_chr4 | 23380541 23381332 | HERVHF_pro  | - |
| Gorilla_gorilla_gorilla_chr4 | 23381395 23381724 | HERVHF_gag  | - |
| Gorilla_gorilla_gorilla_chr4 | 23383590 23384040 | HERVHF_3LTR | - |
| Gorilla_gorilla_gorilla_chr4 | 24155929 24156382 | HERVHF_5LTR | + |
| Gorilla_gorilla_gorilla_chr4 | 24157955 24158269 | HERVHF_gag  | + |
| Gorilla_gorilla_gorilla_chr4 | 24158691 24160698 | HERVHF_pol  | + |
| Gorilla_gorilla_gorilla_chr4 | 24161182 24161634 | HERVHF_3LTR | + |
| Gorilla_gorilla_gorilla_chr4 | 49774836 49775204 | HERVHF_5LTR | - |
| Gorilla_gorilla_gorilla_chr4 | 49775354 49775719 | HERVHF_env  | - |
| Gorilla_gorilla_gorilla_chr4 | 49777300 49779121 | HERVHF_pol  | - |
| Gorilla_gorilla_gorilla_chr4 | 49778791 49779267 | HERVHF_pro  | - |
| Gorilla_gorilla_gorilla_chr4 | 49779323 49779649 | HERVHF_gag  | - |
| Gorilla_gorilla_gorilla_chr4 | 49781102 49781474 | HERVHF_3LTR | - |
| Gorilla_gorilla_gorilla_chr4 | 51038544 51038962 | HERVHF_5LTR | + |
| Gorilla_gorilla_gorilla_chr4 | 51040735 51041196 | HERVHF_pro  | + |
| Gorilla_gorilla_gorilla_chr4 | 51041214 51042699 | HERVHF_pol  | + |
| Gorilla_gorilla_gorilla_chr4 | 51042902 51043309 | HERVHF_3LTR | + |
| Gorilla_gorilla_gorilla_chr4 | 55993188 55993643 | HERVHF_5LTR | + |
| Gorilla_gorilla_gorilla_chr4 | 55995536 55995919 | HERVHF_gag  | + |
| Gorilla_gorilla_gorilla_chr4 | 55995996 55996526 | HERVHF_pro  | + |
| Gorilla_gorilla_gorilla_chr4 | 55996355 55998380 | HERVHF_pol  | + |
| Gorilla_gorilla_gorilla_chr4 | 55998778 55999232 | HERVHF_3LTR | + |
| Gorilla_gorilla_gorilla_chr4 | 66028792 66029120 | HERVK_5LTR  | - |
| Gorilla_gorilla_gorilla_chr4 | 66031753 66032899 | HERVK_pol   | - |
| Gorilla_gorilla_gorilla_chr4 | 66032534 66033754 | HERVK_pro   | - |
| Gorilla_gorilla_gorilla_chr4 | 66038684 66039011 | HERVK_3LTR  | - |
| Gorilla_gorilla_gorilla_chr4 | 75981822 75982275 | HERVHF_5LTR | - |
| Gorilla_gorilla_gorilla_chr4 | 75982687 75984675 | HERVHF_pol  | - |
| Gorilla_gorilla_gorilla_chr4 | 75984268 75984900 | HERVHF_pro  | - |
| Gorilla_gorilla_gorilla_chr4 | 75985103 75985432 | HERVHF_gag  | - |
| Gorilla_gorilla_gorilla_chr4 | 75987316 75987767 | HERVHF_3LTR | - |
| Gorilla_gorilla_gorilla_chr4 | 76818745 76819145 | HERVHF_5LTR | - |
| Gorilla_gorilla_gorilla_chr4 | 76819547 76821666 | HERVHF_pol  | - |
| Gorilla_gorilla_gorilla_chr4 | 76821124 76821957 | HERVHF_pro  | - |
| Gorilla_gorilla_gorilla_chr4 | 76821991 76822374 | HERVHF_gag  | - |
| Gorilla_gorilla_gorilla_chr4 | 76824043 76824442 | HERVHF_3LTR | - |
| Gorilla_gorilla_gorilla_chr4 | 85226656 85227121 | HERVHF_5LTR | + |
| Gorilla_gorilla_gorilla_chr4 | 85229203 85230030 | HERVHF_pro  | + |
| Gorilla_gorilla_gorilla_chr4 | 85229488 85231617 | HERVHF_pol  | + |
| Gorilla_gorilla_gorilla_chr4 | 85232023 85232479 | HERVHF_3LTR | + |
| Gorilla_gorilla_gorilla_chr4 | 87272243 87272653 | HERVHF_5LTR | - |

|                              |           |           |             |   |
|------------------------------|-----------|-----------|-------------|---|
| Gorilla_gorilla_gorilla_chr4 | 87273102  | 87275216  | HERVHF_pol  | - |
| Gorilla_gorilla_gorilla_chr4 | 87275538  | 87275918  | HERVHF_gag  | - |
| Gorilla_gorilla_gorilla_chr4 | 87277523  | 87277927  | HERVHF_3LTR | - |
| Gorilla_gorilla_gorilla_chr4 | 88336675  | 88337037  | HERVHF_5LTR | - |
| Gorilla_gorilla_gorilla_chr4 | 88337602  | 88340008  | HERVHF_pol  | - |
| Gorilla_gorilla_gorilla_chr4 | 88339995  | 88340561  | HERVHF_pro  | - |
| Gorilla_gorilla_gorilla_chr4 | 88342504  | 88342862  | HERVHF_3LTR | - |
| Gorilla_gorilla_gorilla_chr4 | 88916911  | 88917361  | HERVHF_5LTR | + |
| Gorilla_gorilla_gorilla_chr4 | 88919419  | 88919742  | HERVHF_gag  | + |
| Gorilla_gorilla_gorilla_chr4 | 88919753  | 88920565  | HERVHF_pro  | + |
| Gorilla_gorilla_gorilla_chr4 | 88920026  | 88922104  | HERVHF_pol  | + |
| Gorilla_gorilla_gorilla_chr4 | 88922424  | 88922878  | HERVHF_3LTR | + |
| Gorilla_gorilla_gorilla_chr4 | 91773362  | 91773765  | HERVHF_5LTR | - |
| Gorilla_gorilla_gorilla_chr4 | 91774633  | 91776919  | HERVHF_pol  | - |
| Gorilla_gorilla_gorilla_chr4 | 91776338  | 91777171  | HERVHF_pro  | - |
| Gorilla_gorilla_gorilla_chr4 | 91777175  | 91777504  | HERVHF_gag  | - |
| Gorilla_gorilla_gorilla_chr4 | 91779378  | 91779792  | HERVHF_3LTR | - |
| Gorilla_gorilla_gorilla_chr4 | 101386317 | 101386732 | HERVHF_5LTR | + |
| Gorilla_gorilla_gorilla_chr4 | 101388237 | 101388641 | HERVHF_gag  | + |
| Gorilla_gorilla_gorilla_chr4 | 101388879 | 101390482 | HERVHF_pol  | + |
| Gorilla_gorilla_gorilla_chr4 | 101391698 | 101392113 | HERVHF_3LTR | + |
| Gorilla_gorilla_gorilla_chr4 | 117132923 | 117133236 | HERVHF_5LTR | + |
| Gorilla_gorilla_gorilla_chr4 | 117135285 | 117135605 | HERVHF_gag  | + |
| Gorilla_gorilla_gorilla_chr4 | 117135728 | 117136441 | HERVHF_pro  | + |
| Gorilla_gorilla_gorilla_chr4 | 117135803 | 117138080 | HERVHF_pol  | + |
| Gorilla_gorilla_gorilla_chr4 | 117138629 | 117138939 | HERVHF_3LTR | + |
| Gorilla_gorilla_gorilla_chr4 | 122739193 | 122739646 | HERVHF_5LTR | - |
| Gorilla_gorilla_gorilla_chr4 | 122740234 | 122742174 | HERVHF_pol  | - |
| Gorilla_gorilla_gorilla_chr4 | 122741632 | 122742381 | HERVHF_pro  | - |
| Gorilla_gorilla_gorilla_chr4 | 122744620 | 122745071 | HERVHF_3LTR | - |
| Gorilla_gorilla_gorilla_chr4 | 125904738 | 125905152 | HERVHF_5LTR | - |
| Gorilla_gorilla_gorilla_chr4 | 125905552 | 125907674 | HERVHF_pol  | - |
| Gorilla_gorilla_gorilla_chr4 | 125907078 | 125907806 | HERVHF_pro  | - |
| Gorilla_gorilla_gorilla_chr4 | 125907953 | 125908380 | HERVHF_gag  | - |
| Gorilla_gorilla_gorilla_chr4 | 125910074 | 125910483 | HERVHF_3LTR | - |
| Gorilla_gorilla_gorilla_chr4 | 131101772 | 131102177 | HERVHF_5LTR | + |
| Gorilla_gorilla_gorilla_chr4 | 131103900 | 131104217 | HERVHF_gag  | + |
| Gorilla_gorilla_gorilla_chr4 | 131104269 | 131105054 | HERVHF_pro  | + |
| Gorilla_gorilla_gorilla_chr4 | 131104425 | 131107040 | HERVHF_pol  | + |
| Gorilla_gorilla_gorilla_chr4 | 131107547 | 131107949 | HERVHF_3LTR | + |
| Gorilla_gorilla_gorilla_chr4 | 149542802 | 149543256 | HERVHF_5LTR | - |
| Gorilla_gorilla_gorilla_chr4 | 149543684 | 149545716 | HERVHF_pol  | - |
| Gorilla_gorilla_gorilla_chr4 | 149548033 | 149548503 | HERVHF_3LTR | - |
| Gorilla_gorilla_gorilla_chr4 | 153425345 | 153425785 | HERVHF_5LTR | + |

|                              |           |           |             |   |
|------------------------------|-----------|-----------|-------------|---|
| Gorilla_gorilla_gorilla_chr4 | 153427596 | 153427978 | HERVHF_gag  | + |
| Gorilla_gorilla_gorilla_chr4 | 153428486 | 153430428 | HERVHF_pol  | + |
| Gorilla_gorilla_gorilla_chr4 | 153430835 | 153431284 | HERVHF_3LTR | + |
| Gorilla_gorilla_gorilla_chr4 | 163406241 | 163406701 | HERVHF_5LTR | + |
| Gorilla_gorilla_gorilla_chr4 | 163408637 | 163408960 | HERVHF_gag  | + |
| Gorilla_gorilla_gorilla_chr4 | 163408994 | 163409374 | HERVHF_pro  | + |
| Gorilla_gorilla_gorilla_chr4 | 163409323 | 163411378 | HERVHF_pol  | + |
| Gorilla_gorilla_gorilla_chr4 | 163411785 | 163412237 | HERVHF_3LTR | + |
| Gorilla_gorilla_gorilla_chr4 | 164578401 | 164578798 | HERVHF_5LTR | + |
| Gorilla_gorilla_gorilla_chr4 | 164580470 | 164580790 | HERVHF_gag  | + |
| Gorilla_gorilla_gorilla_chr4 | 164580842 | 164581408 | HERVHF_pro  | + |
| Gorilla_gorilla_gorilla_chr4 | 164581499 | 164582462 | HERVHF_pol  | + |
| Gorilla_gorilla_gorilla_chr4 | 164583689 | 164584087 | HERVHF_3LTR | + |
| Gorilla_gorilla_gorilla_chr4 | 164626432 | 164626901 | HERVHF_5LTR | + |
| Gorilla_gorilla_gorilla_chr4 | 164628399 | 164628914 | HERVHF_gag  | + |
| Gorilla_gorilla_gorilla_chr4 | 164629237 | 164631197 | HERVHF_pol  | + |
| Gorilla_gorilla_gorilla_chr4 | 164631784 | 164632252 | HERVHF_3LTR | + |
| Gorilla_gorilla_gorilla_chr4 | 166825995 | 166826409 | HERVHF_5LTR | + |
| Gorilla_gorilla_gorilla_chr4 | 166828862 | 166830810 | HERVHF_pol  | + |
| Gorilla_gorilla_gorilla_chr4 | 166831205 | 166831622 | HERVHF_3LTR | + |
| Gorilla_gorilla_gorilla_chr4 | 169738947 | 169739266 | HERVHF_5LTR | - |
| Gorilla_gorilla_gorilla_chr4 | 169740311 | 169742575 | HERVHF_pol  | - |
| Gorilla_gorilla_gorilla_chr4 | 169742075 | 169742575 | HERVHF_pro  | - |
| Gorilla_gorilla_gorilla_chr4 | 169742830 | 169743171 | HERVHF_gag  | - |
| Gorilla_gorilla_gorilla_chr4 | 169744970 | 169745270 | HERVHF_3LTR | - |
| Gorilla_gorilla_gorilla_chr4 | 179640580 | 179641013 | HERVHF_5LTR | + |
| Gorilla_gorilla_gorilla_chr4 | 179643253 | 179643582 | HERVHF_gag  | + |
| Gorilla_gorilla_gorilla_chr4 | 179643589 | 179644365 | HERVHF_pro  | + |
| Gorilla_gorilla_gorilla_chr4 | 179643742 | 179644500 | HERVHF_pol  | + |
| Gorilla_gorilla_gorilla_chr4 | 179645038 | 179645470 | HERVHF_3LTR | + |
| Gorilla_gorilla_gorilla_chr4 | 182874643 | 182874946 | HERVHF_5LTR | - |
| Gorilla_gorilla_gorilla_chr4 | 182875397 | 182877599 | HERVHF_pol  | - |
| Gorilla_gorilla_gorilla_chr4 | 182877952 | 182878293 | HERVHF_gag  | - |
| Gorilla_gorilla_gorilla_chr4 | 182879762 | 182880073 | HERVHF_3LTR | - |
| Gorilla_gorilla_gorilla_chr4 | 186263168 | 186263618 | HERVHF_5LTR | - |
| Gorilla_gorilla_gorilla_chr4 | 186264281 | 186266951 | HERVHF_pol  | - |
| Gorilla_gorilla_gorilla_chr4 | 186267441 | 186267944 | HERVHF_gag  | - |
| Gorilla_gorilla_gorilla_chr4 | 186269657 | 186270120 | HERVHF_3LTR | - |
| Gorilla_gorilla_gorilla_chr4 | 186633813 | 186634215 | HERVHF_5LTR | + |
| Gorilla_gorilla_gorilla_chr4 | 186636277 | 186637101 | HERVHF_pro  | + |
| Gorilla_gorilla_gorilla_chr4 | 186636436 | 186638922 | HERVHF_pol  | + |
| Gorilla_gorilla_gorilla_chr4 | 186639375 | 186639777 | HERVHF_3LTR | + |
| Gorilla_gorilla_gorilla_chr5 | 48681701  | 48682134  | HERVHF_5LTR | - |
| Gorilla_gorilla_gorilla_chr5 | 48683369  | 48684767  | HERVHF_pol  | - |

|                              |           |           |             |   |
|------------------------------|-----------|-----------|-------------|---|
| Gorilla_gorilla_gorilla_chr5 | 48684153  | 48684962  | HERVHF_pro  | - |
| Gorilla_gorilla_gorilla_chr5 | 48684965  | 48685294  | HERVHF_gag  | - |
| Gorilla_gorilla_gorilla_chr5 | 48687089  | 48687522  | HERVHF_3LTR | - |
| Gorilla_gorilla_gorilla_chr5 | 62640482  | 62640791  | HERVHF_5LTR | + |
| Gorilla_gorilla_gorilla_chr5 | 62642537  | 62642842  | HERVHF_gag  | + |
| Gorilla_gorilla_gorilla_chr5 | 62643088  | 62643678  | HERVHF_pro  | + |
| Gorilla_gorilla_gorilla_chr5 | 62643097  | 62644698  | HERVHF_pol  | + |
| Gorilla_gorilla_gorilla_chr5 | 62646055  | 62646361  | HERVHF_3LTR | + |
| Gorilla_gorilla_gorilla_chr5 | 81530683  | 81531035  | HERVHF_5LTR | - |
| Gorilla_gorilla_gorilla_chr5 | 81531624  | 81533531  | HERVHF_pol  | - |
| Gorilla_gorilla_gorilla_chr5 | 81532968  | 81533840  | HERVHF_pro  | - |
| Gorilla_gorilla_gorilla_chr5 | 81536265  | 81536614  | HERVHF_3LTR | - |
| Gorilla_gorilla_gorilla_chr5 | 84578414  | 84578826  | HERVHF_5LTR | + |
| Gorilla_gorilla_gorilla_chr5 | 84580464  | 84580763  | HERVHF_gag  | + |
| Gorilla_gorilla_gorilla_chr5 | 84580841  | 84581590  | HERVHF_pro  | + |
| Gorilla_gorilla_gorilla_chr5 | 84581129  | 84583200  | HERVHF_pol  | + |
| Gorilla_gorilla_gorilla_chr5 | 84583214  | 84583581  | HERVHF_env  | + |
| Gorilla_gorilla_gorilla_chr5 | 84583595  | 84584005  | HERVHF_3LTR | + |
| Gorilla_gorilla_gorilla_chr5 | 84608907  | 84609374  | HERVHF_5LTR | - |
| Gorilla_gorilla_gorilla_chr5 | 84609766  | 84612429  | HERVHF_pol  | - |
| Gorilla_gorilla_gorilla_chr5 | 84611887  | 84612633  | HERVHF_pro  | - |
| Gorilla_gorilla_gorilla_chr5 | 84613036  | 84614077  | HERVHF_gag  | - |
| Gorilla_gorilla_gorilla_chr5 | 84615286  | 84615765  | HERVHF_3LTR | - |
| Gorilla_gorilla_gorilla_chr5 | 87513941  | 87514250  | HERVHF_5LTR | + |
| Gorilla_gorilla_gorilla_chr5 | 87516190  | 87516870  | HERVHF_pro  | + |
| Gorilla_gorilla_gorilla_chr5 | 87516448  | 87518497  | HERVHF_pol  | + |
| Gorilla_gorilla_gorilla_chr5 | 87518978  | 87519291  | HERVHF_3LTR | + |
| Gorilla_gorilla_gorilla_chr5 | 89092939  | 89093395  | HERVHF_5LTR | + |
| Gorilla_gorilla_gorilla_chr5 | 89094832  | 89095155  | HERVHF_gag  | + |
| Gorilla_gorilla_gorilla_chr5 | 89095278  | 89095724  | HERVHF_pro  | + |
| Gorilla_gorilla_gorilla_chr5 | 89095685  | 89097539  | HERVHF_pol  | + |
| Gorilla_gorilla_gorilla_chr5 | 89098028  | 89098460  | HERVHF_3LTR | + |
| Gorilla_gorilla_gorilla_chr5 | 94238766  | 94239219  | HERVK_5LTR  | + |
| Gorilla_gorilla_gorilla_chr5 | 94239997  | 94240937  | HERVK_pro   | + |
| Gorilla_gorilla_gorilla_chr5 | 94240832  | 94241626  | HERVK_pol   | + |
| Gorilla_gorilla_gorilla_chr5 | 94242947  | 94243402  | HERVK_3LTR  | + |
| Gorilla_gorilla_gorilla_chr5 | 101253948 | 101254400 | HERVHF_5LTR | - |
| Gorilla_gorilla_gorilla_chr5 | 101254851 | 101256893 | HERVHF_pol  | - |
| Gorilla_gorilla_gorilla_chr5 | 101256351 | 101257184 | HERVHF_pro  | - |
| Gorilla_gorilla_gorilla_chr5 | 101257188 | 101257511 | HERVHF_gag  | - |
| Gorilla_gorilla_gorilla_chr5 | 101259339 | 101259793 | HERVHF_3LTR | - |
| Gorilla_gorilla_gorilla_chr5 | 104944699 | 104945042 | HERVHF_5LTR | + |
| Gorilla_gorilla_gorilla_chr5 | 104947281 | 104948030 | HERVHF_pro  | + |
| Gorilla_gorilla_gorilla_chr5 | 104947392 | 104949567 | HERVHF_pol  | + |

|                              |           |           |               |   |
|------------------------------|-----------|-----------|---------------|---|
| Gorilla_gorilla_gorilla_chr5 | 104950067 | 104950412 | HERVHF_3LTR   | + |
| Gorilla_gorilla_gorilla_chr5 | 116992967 | 116993429 | HERVHF_5LTR   | + |
| Gorilla_gorilla_gorilla_chr5 | 116994800 | 116995336 | HERVHF_gag    | + |
| Gorilla_gorilla_gorilla_chr5 | 116995410 | 116995949 | HERVHF_pro    | + |
| Gorilla_gorilla_gorilla_chr5 | 116995806 | 116997310 | HERVHF_pol    | + |
| Gorilla_gorilla_gorilla_chr5 | 116998186 | 116998638 | HERVHF_3LTR   | + |
| Gorilla_gorilla_gorilla_chr5 | 117232733 | 117233154 | HERVHF_5LTR   | - |
| Gorilla_gorilla_gorilla_chr5 | 117233607 | 117234314 | HERVHF_pol    | - |
| Gorilla_gorilla_gorilla_chr5 | 117234650 | 117234973 | HERVHF_gag    | - |
| Gorilla_gorilla_gorilla_chr5 | 117236673 | 117237095 | HERVHF_3LTR   | - |
| Gorilla_gorilla_gorilla_chr5 | 121537799 | 121538242 | HSERVIII_5LTR | - |
| Gorilla_gorilla_gorilla_chr5 | 121538774 | 121539430 | HSERVIII_pol  | - |
| Gorilla_gorilla_gorilla_chr5 | 121541621 | 121542066 | HSERVIII_3LTR | - |
| Gorilla_gorilla_gorilla_chr5 | 134135303 | 134135760 | HERVHF_5LTR   | - |
| Gorilla_gorilla_gorilla_chr5 | 134136286 | 134138157 | HERVHF_pol    | - |
| Gorilla_gorilla_gorilla_chr5 | 134140581 | 134141034 | HERVHF_3LTR   | - |
| Gorilla_gorilla_gorilla_chr6 | 16811240  | 16811650  | HERVHF_5LTR   | + |
| Gorilla_gorilla_gorilla_chr6 | 16813981  | 16815924  | HERVHF_pol    | + |
| Gorilla_gorilla_gorilla_chr6 | 16816496  | 16816905  | HERVHF_3LTR   | + |
| Gorilla_gorilla_gorilla_chr6 | 18687877  | 18688280  | HERVHF_5LTR   | - |
| Gorilla_gorilla_gorilla_chr6 | 18688731  | 18690781  | HERVHF_pol    | - |
| Gorilla_gorilla_gorilla_chr6 | 18693221  | 18693624  | HERVHF_3LTR   | - |
| Gorilla_gorilla_gorilla_chr6 | 29194077  | 29194436  | HERVHF_5LTR   | - |
| Gorilla_gorilla_gorilla_chr6 | 29194607  | 29195116  | HERVHF_env    | - |
| Gorilla_gorilla_gorilla_chr6 | 29195498  | 29197749  | HERVHF_pol    | - |
| Gorilla_gorilla_gorilla_chr6 | 29198168  | 29198956  | HERVHF_pro    | - |
| Gorilla_gorilla_gorilla_chr6 | 29199013  | 29199369  | HERVHF_gag    | - |
| Gorilla_gorilla_gorilla_chr6 | 29200990  | 29201345  | HERVHF_3LTR   | - |
| Gorilla_gorilla_gorilla_chr6 | 41025422  | 41025855  | HERVHF_5LTR   | - |
| Gorilla_gorilla_gorilla_chr6 | 41026016  | 41027200  | HERVHF_env    | - |
| Gorilla_gorilla_gorilla_chr6 | 41028043  | 41031062  | HERVHF_pol    | - |
| Gorilla_gorilla_gorilla_chr6 | 41031490  | 41032080  | HERVHF_gag    | - |
| Gorilla_gorilla_gorilla_chr6 | 41032343  | 41032776  | HERVHF_3LTR   | - |
| Gorilla_gorilla_gorilla_chr6 | 52128444  | 52128891  | HERVHF_5LTR   | + |
| Gorilla_gorilla_gorilla_chr6 | 52130533  | 52130859  | HERVHF_gag    | + |
| Gorilla_gorilla_gorilla_chr6 | 52131285  | 52133217  | HERVHF_pol    | + |
| Gorilla_gorilla_gorilla_chr6 | 52133847  | 52134298  | HERVHF_3LTR   | + |
| Gorilla_gorilla_gorilla_chr6 | 61837828  | 61838194  | HERVHF_5LTR   | + |
| Gorilla_gorilla_gorilla_chr6 | 61839566  | 61839895  | HERVHF_gag    | + |
| Gorilla_gorilla_gorilla_chr6 | 61840114  | 61840908  | HERVHF_pro    | + |
| Gorilla_gorilla_gorilla_chr6 | 61840177  | 61842343  | HERVHF_pol    | + |
| Gorilla_gorilla_gorilla_chr6 | 61843265  | 61843627  | HERVHF_env    | + |
| Gorilla_gorilla_gorilla_chr6 | 61843786  | 61844151  | HERVHF_3LTR   | + |
| Gorilla_gorilla_gorilla_chr6 | 65452004  | 65452440  | HERVHF_5LTR   | - |



|                              |           |           |             |   |
|------------------------------|-----------|-----------|-------------|---|
| Gorilla_gorilla_gorilla_chr6 | 65452610  | 65453288  | HERVHF_env  | - |
| Gorilla_gorilla_gorilla_chr6 | 65453970  | 65455937  | HERVHF_pol  | - |
| Gorilla_gorilla_gorilla_chr6 | 65455353  | 65456186  | HERVHF_pro  | - |
| Gorilla_gorilla_gorilla_chr6 | 65457914  | 65458351  | HERVHF_3LTR | - |
| Gorilla_gorilla_gorilla_chr6 | 78124554  | 78124967  | HERVHF_5LTR | - |
| Gorilla_gorilla_gorilla_chr6 | 78126019  | 78127908  | HERVHF_pol  | - |
| Gorilla_gorilla_gorilla_chr6 | 78128367  | 78128678  | HERVHF_gag  | - |
| Gorilla_gorilla_gorilla_chr6 | 78130163  | 78130575  | HERVHF_3LTR | - |
| Gorilla_gorilla_gorilla_chr6 | 78943687  | 78944015  | HERVHF_5LTR | - |
| Gorilla_gorilla_gorilla_chr6 | 78952833  | 78954731  | HERVHF_pol  | - |
| Gorilla_gorilla_gorilla_chr6 | 78954168  | 78955022  | HERVHF_pro  | - |
| Gorilla_gorilla_gorilla_chr6 | 78957745  | 78958078  | HERVHF_3LTR | - |
| Gorilla_gorilla_gorilla_chr6 | 88291679  | 88292134  | HERVHF_5LTR | - |
| Gorilla_gorilla_gorilla_chr6 | 88292939  | 88294709  | HERVHF_pol  | - |
| Gorilla_gorilla_gorilla_chr6 | 88294953  | 88295282  | HERVHF_gag  | - |
| Gorilla_gorilla_gorilla_chr6 | 88296523  | 88296976  | HERVHF_3LTR | - |
| Gorilla_gorilla_gorilla_chr6 | 91464034  | 91464495  | HERVHF_5LTR | - |
| Gorilla_gorilla_gorilla_chr6 | 91465273  | 91467076  | HERVHF_pol  | - |
| Gorilla_gorilla_gorilla_chr6 | 91466438  | 91467190  | HERVHF_pro  | - |
| Gorilla_gorilla_gorilla_chr6 | 91467274  | 91467603  | HERVHF_gag  | - |
| Gorilla_gorilla_gorilla_chr6 | 91469335  | 91469800  | HERVHF_3LTR | - |
| Gorilla_gorilla_gorilla_chr6 | 109945792 | 109946258 | HERVHF_5LTR | - |
| Gorilla_gorilla_gorilla_chr6 | 109947115 | 109948801 | HERVHF_pol  | - |
| Gorilla_gorilla_gorilla_chr6 | 109948259 | 109949089 | HERVHF_pro  | - |
| Gorilla_gorilla_gorilla_chr6 | 109949154 | 109949507 | HERVHF_gag  | - |
| Gorilla_gorilla_gorilla_chr6 | 109951426 | 109951876 | HERVHF_3LTR | - |
| Gorilla_gorilla_gorilla_chr6 | 110555472 | 110555930 | HERVHF_5LTR | + |
| Gorilla_gorilla_gorilla_chr6 | 110558040 | 110558870 | HERVHF_pro  | + |
| Gorilla_gorilla_gorilla_chr6 | 110558235 | 110560394 | HERVHF_pol  | + |
| Gorilla_gorilla_gorilla_chr6 | 110560849 | 110561308 | HERVHF_3LTR | + |
| Gorilla_gorilla_gorilla_chr6 | 119088595 | 119088997 | HERVHF_5LTR | - |
| Gorilla_gorilla_gorilla_chr6 | 119089396 | 119091390 | HERVHF_pol  | - |
| Gorilla_gorilla_gorilla_chr6 | 119091097 | 119091555 | HERVHF_pro  | - |
| Gorilla_gorilla_gorilla_chr6 | 119091818 | 119092132 | HERVHF_gag  | - |
| Gorilla_gorilla_gorilla_chr6 | 119093867 | 119094270 | HERVHF_3LTR | - |
| Gorilla_gorilla_gorilla_chr6 | 122356339 | 122356769 | HERVHF_5LTR | + |
| Gorilla_gorilla_gorilla_chr6 | 122358841 | 122359590 | HERVHF_pro  | + |
| Gorilla_gorilla_gorilla_chr6 | 122359048 | 122361151 | HERVHF_pol  | + |
| Gorilla_gorilla_gorilla_chr6 | 122361560 | 122361990 | HERVHF_3LTR | + |
| Gorilla_gorilla_gorilla_chr6 | 126825408 | 126825864 | HERVHF_5LTR | + |
| Gorilla_gorilla_gorilla_chr6 | 126827875 | 126828651 | HERVHF_pro  | + |
| Gorilla_gorilla_gorilla_chr6 | 126828136 | 126830076 | HERVHF_pol  | + |
| Gorilla_gorilla_gorilla_chr6 | 126830661 | 126831105 | HERVHF_3LTR | + |
| Gorilla_gorilla_gorilla_chr6 | 126862980 | 126863433 | HERVHF_5LTR | + |

|                              |           |           |             |   |
|------------------------------|-----------|-----------|-------------|---|
| Gorilla_gorilla_gorilla_chr6 | 126865142 | 126865441 | HERVHF_gag  | + |
| Gorilla_gorilla_gorilla_chr6 | 126865858 | 126867442 | HERVHF_pol  | + |
| Gorilla_gorilla_gorilla_chr6 | 126868223 | 126868677 | HERVHF_3LTR | + |
| Gorilla_gorilla_gorilla_chr6 | 126929469 | 126929826 | HERVHF_5LTR | + |
| Gorilla_gorilla_gorilla_chr6 | 126931275 | 126931715 | HERVHF_gag  | + |
| Gorilla_gorilla_gorilla_chr6 | 126932320 | 126934064 | HERVHF_pol  | + |
| Gorilla_gorilla_gorilla_chr6 | 126934655 | 126935020 | HERVHF_3LTR | + |
| Gorilla_gorilla_gorilla_chr6 | 137492333 | 137492787 | HERVHF_5LTR | + |
| Gorilla_gorilla_gorilla_chr6 | 137494828 | 137495373 | HERVHF_pro  | + |
| Gorilla_gorilla_gorilla_chr6 | 137495375 | 137497455 | HERVHF_pol  | + |
| Gorilla_gorilla_gorilla_chr6 | 137497849 | 137498318 | HERVHF_3LTR | + |
| Gorilla_gorilla_gorilla_chr6 | 140387656 | 140388089 | HERVHF_5LTR | + |
| Gorilla_gorilla_gorilla_chr6 | 140389933 | 140390256 | HERVHF_gag  | + |
| Gorilla_gorilla_gorilla_chr6 | 140390693 | 140392439 | HERVHF_pol  | + |
| Gorilla_gorilla_gorilla_chr6 | 140393018 | 140393429 | HERVHF_3LTR | + |
| Gorilla_gorilla_gorilla_chr6 | 140569274 | 140569683 | HERVHF_5LTR | - |
| Gorilla_gorilla_gorilla_chr6 | 140570266 | 140572070 | HERVHF_pol  | - |
| Gorilla_gorilla_gorilla_chr6 | 140571690 | 140572418 | HERVHF_pro  | - |
| Gorilla_gorilla_gorilla_chr6 | 140574538 | 140574949 | HERVHF_3LTR | - |
| Gorilla_gorilla_gorilla_chr6 | 155751602 | 155752005 | HERVHF_5LTR | - |
| Gorilla_gorilla_gorilla_chr6 | 155752780 | 155754399 | HERVHF_pol  | - |
| Gorilla_gorilla_gorilla_chr6 | 155754022 | 155754573 | HERVHF_pro  | - |
| Gorilla_gorilla_gorilla_chr6 | 155756778 | 155757183 | HERVHF_3LTR | - |
| Gorilla_gorilla_gorilla_chr6 | 159780417 | 159780831 | HERVHF_5LTR | - |
| Gorilla_gorilla_gorilla_chr6 | 159781403 | 159783289 | HERVHF_pol  | - |
| Gorilla_gorilla_gorilla_chr6 | 159786090 | 159786516 | HERVHF_3LTR | - |
| Gorilla_gorilla_gorilla_chr7 | 6846895   | 6847325   | HERVHF_5LTR | + |
| Gorilla_gorilla_gorilla_chr7 | 6849771   | 6851221   | HERVHF_pol  | + |
| Gorilla_gorilla_gorilla_chr7 | 6851670   | 6852094   | HERVHF_3LTR | + |
| Gorilla_gorilla_gorilla_chr7 | 9336511   | 9336901   | HERVHF_5LTR | - |
| Gorilla_gorilla_gorilla_chr7 | 9338129   | 9339441   | HERVHF_pol  | - |
| Gorilla_gorilla_gorilla_chr7 | 9339729   | 9340052   | HERVHF_gag  | - |
| Gorilla_gorilla_gorilla_chr7 | 9341859   | 9342250   | HERVHF_3LTR | - |
| Gorilla_gorilla_gorilla_chr7 | 9435955   | 9436405   | HERVHF_5LTR | - |
| Gorilla_gorilla_gorilla_chr7 | 9437282   | 9439596   | HERVHF_pol  | - |
| Gorilla_gorilla_gorilla_chr7 | 9439177   | 9439785   | HERVHF_pro  | - |
| Gorilla_gorilla_gorilla_chr7 | 9441953   | 9442406   | HERVHF_3LTR | - |
| Gorilla_gorilla_gorilla_chr7 | 20144693  | 20145153  | HERVHF_5LTR | + |
| Gorilla_gorilla_gorilla_chr7 | 20146585  | 20146935  | HERVHF_gag  | + |
| Gorilla_gorilla_gorilla_chr7 | 20147275  | 20147976  | HERVHF_pro  | + |
| Gorilla_gorilla_gorilla_chr7 | 20147314  | 20149377  | HERVHF_pol  | + |
| Gorilla_gorilla_gorilla_chr7 | 20150028  | 20150486  | HERVHF_3LTR | + |
| Gorilla_gorilla_gorilla_chr7 | 26021328  | 26021675  | HERVHF_5LTR | - |
| Gorilla_gorilla_gorilla_chr7 | 26022519  | 26024200  | HERVHF_pol  | - |

|                              |           |           |             |   |
|------------------------------|-----------|-----------|-------------|---|
| Gorilla_gorilla_gorilla_chr7 | 26023661  | 26024461  | HERVHF_pro  | - |
| Gorilla_gorilla_gorilla_chr7 | 26024515  | 26024898  | HERVHF_gag  | - |
| Gorilla_gorilla_gorilla_chr7 | 26026434  | 26026765  | HERVHF_3LTR | - |
| Gorilla_gorilla_gorilla_chr7 | 31479119  | 31479523  | HERVHF_5LTR | - |
| Gorilla_gorilla_gorilla_chr7 | 31479973  | 31482095  | HERVHF_pol  | - |
| Gorilla_gorilla_gorilla_chr7 | 31482588  | 31482971  | HERVHF_gag  | - |
| Gorilla_gorilla_gorilla_chr7 | 31484211  | 31484620  | HERVHF_3LTR | - |
| Gorilla_gorilla_gorilla_chr7 | 34350281  | 34350723  | HERVHF_5LTR | - |
| Gorilla_gorilla_gorilla_chr7 | 34351128  | 34353186  | HERVHF_pol  | - |
| Gorilla_gorilla_gorilla_chr7 | 34355279  | 34355720  | HERVHF_3LTR | - |
| Gorilla_gorilla_gorilla_chr7 | 89665060  | 89665509  | HERVHF_5LTR | - |
| Gorilla_gorilla_gorilla_chr7 | 89666306  | 89667977  | HERVHF_pol  | - |
| Gorilla_gorilla_gorilla_chr7 | 89667477  | 89668307  | HERVHF_pro  | - |
| Gorilla_gorilla_gorilla_chr7 | 89668314  | 89668724  | HERVHF_gag  | - |
| Gorilla_gorilla_gorilla_chr7 | 89670547  | 89671002  | HERVHF_3LTR | - |
| Gorilla_gorilla_gorilla_chr7 | 96224196  | 96224611  | HERVHF_5LTR | + |
| Gorilla_gorilla_gorilla_chr7 | 96226477  | 96226896  | HERVHF_gag  | + |
| Gorilla_gorilla_gorilla_chr7 | 96227621  | 96228034  | HERVHF_pol  | + |
| Gorilla_gorilla_gorilla_chr7 | 96228216  | 96228611  | HERVHF_env  | + |
| Gorilla_gorilla_gorilla_chr7 | 96229314  | 96229728  | HERVHF_3LTR | + |
| Gorilla_gorilla_gorilla_chr7 | 114150411 | 114150816 | HERVHF_5LTR | - |
| Gorilla_gorilla_gorilla_chr7 | 114151846 | 114153760 | HERVHF_pol  | - |
| Gorilla_gorilla_gorilla_chr7 | 114153353 | 114154183 | HERVHF_pro  | - |
| Gorilla_gorilla_gorilla_chr7 | 114154279 | 114154731 | HERVHF_gag  | - |
| Gorilla_gorilla_gorilla_chr7 | 114156382 | 114156787 | HERVHF_3LTR | - |
| Gorilla_gorilla_gorilla_chr7 | 119338059 | 119338537 | HERVHF_5LTR | + |
| Gorilla_gorilla_gorilla_chr7 | 119340259 | 119340579 | HERVHF_gag  | + |
| Gorilla_gorilla_gorilla_chr7 | 119340631 | 119341416 | HERVHF_pro  | + |
| Gorilla_gorilla_gorilla_chr7 | 119340874 | 119342955 | HERVHF_pol  | + |
| Gorilla_gorilla_gorilla_chr7 | 119343388 | 119343864 | HERVHF_3LTR | + |
| Gorilla_gorilla_gorilla_chr7 | 119345675 | 119346083 | HERVHF_5LTR | + |
| Gorilla_gorilla_gorilla_chr7 | 119348279 | 119348959 | HERVHF_pro  | + |
| Gorilla_gorilla_gorilla_chr7 | 119348486 | 119351209 | HERVHF_pol  | + |
| Gorilla_gorilla_gorilla_chr7 | 119351803 | 119352213 | HERVHF_3LTR | + |
| Gorilla_gorilla_gorilla_chr7 | 141697888 | 141698302 | HERVHF_5LTR | - |
| Gorilla_gorilla_gorilla_chr7 | 141698537 | 141699273 | HERVHF_env  | - |
| Gorilla_gorilla_gorilla_chr7 | 141700165 | 141701376 | HERVHF_pol  | - |
| Gorilla_gorilla_gorilla_chr7 | 141703666 | 141704082 | HERVHF_3LTR | - |
| Gorilla_gorilla_gorilla_chr8 | 35092140  | 35092573  | HERVHF_5LTR | + |
| Gorilla_gorilla_gorilla_chr8 | 35094400  | 35094720  | HERVHF_gag  | + |
| Gorilla_gorilla_gorilla_chr8 | 35094713  | 35095555  | HERVHF_pro  | + |
| Gorilla_gorilla_gorilla_chr8 | 35094917  | 35096933  | HERVHF_pol  | + |
| Gorilla_gorilla_gorilla_chr8 | 35097539  | 35097973  | HERVHF_3LTR | + |
| Gorilla_gorilla_gorilla_chr8 | 42882558  | 42882858  | HERVHF_5LTR | - |

|                              |           |           |             |   |
|------------------------------|-----------|-----------|-------------|---|
| Gorilla_gorilla_gorilla_chr8 | 42883448  | 42885383  | HERVHF_pol  | - |
| Gorilla_gorilla_gorilla_chr8 | 42884868  | 42885668  | HERVHF_pro  | - |
| Gorilla_gorilla_gorilla_chr8 | 42885717  | 42886088  | HERVHF_gag  | - |
| Gorilla_gorilla_gorilla_chr8 | 42887941  | 42888247  | HERVHF_3LTR | - |
| Gorilla_gorilla_gorilla_chr8 | 45582327  | 45582744  | HERVHF_5LTR | - |
| Gorilla_gorilla_gorilla_chr8 | 45583091  | 45585059  | HERVHF_pol  | - |
| Gorilla_gorilla_gorilla_chr8 | 45584535  | 45585482  | HERVHF_pro  | - |
| Gorilla_gorilla_gorilla_chr8 | 45585489  | 45585809  | HERVHF_gag  | - |
| Gorilla_gorilla_gorilla_chr8 | 45587806  | 45588209  | HERVHF_3LTR | - |
| Gorilla_gorilla_gorilla_chr8 | 65759603  | 65760116  | HERVK_5LTR  | - |
| Gorilla_gorilla_gorilla_chr8 | 65761194  | 65762567  | HERVK_pol   | - |
| Gorilla_gorilla_gorilla_chr8 | 65762465  | 65763223  | HERVK_pro   | - |
| Gorilla_gorilla_gorilla_chr8 | 65763447  | 65764121  | HERVK_gag   | - |
| Gorilla_gorilla_gorilla_chr8 | 65764809  | 65765321  | HERVK_3LTR  | - |
| Gorilla_gorilla_gorilla_chr8 | 86128748  | 86129202  | HERVHF_5LTR | - |
| Gorilla_gorilla_gorilla_chr8 | 86129612  | 86131695  | HERVHF_pol  | - |
| Gorilla_gorilla_gorilla_chr8 | 86134039  | 86134470  | HERVHF_3LTR | - |
| Gorilla_gorilla_gorilla_chr8 | 95975821  | 95976177  | HERVHF_5LTR | + |
| Gorilla_gorilla_gorilla_chr8 | 95977979  | 95978392  | HERVHF_gag  | + |
| Gorilla_gorilla_gorilla_chr8 | 95978401  | 95979228  | HERVHF_pro  | + |
| Gorilla_gorilla_gorilla_chr8 | 95978686  | 95979970  | HERVHF_pol  | + |
| Gorilla_gorilla_gorilla_chr8 | 95981297  | 95981659  | HERVHF_3LTR | + |
| Gorilla_gorilla_gorilla_chr8 | 110323921 | 110324395 | HERVHF_5LTR | + |
| Gorilla_gorilla_gorilla_chr8 | 110326158 | 110326481 | HERVHF_gag  | + |
| Gorilla_gorilla_gorilla_chr8 | 110326574 | 110327407 | HERVHF_pro  | + |
| Gorilla_gorilla_gorilla_chr8 | 110326865 | 110328999 | HERVHF_pol  | + |
| Gorilla_gorilla_gorilla_chr8 | 110329380 | 110329846 | HERVHF_3LTR | + |
| Gorilla_gorilla_gorilla_chr8 | 124671168 | 124671634 | HERVHF_5LTR | - |
| Gorilla_gorilla_gorilla_chr8 | 124672072 | 124674018 | HERVHF_pol  | - |
| Gorilla_gorilla_gorilla_chr8 | 124676509 | 124676969 | HERVHF_3LTR | - |
| Gorilla_gorilla_gorilla_chr8 | 124963103 | 124963526 | HERVHF_5LTR | + |
| Gorilla_gorilla_gorilla_chr8 | 124966025 | 124968184 | HERVHF_pol  | + |
| Gorilla_gorilla_gorilla_chr8 | 124968597 | 124969020 | HERVHF_3LTR | + |
| Gorilla_gorilla_gorilla_chr8 | 128154923 | 128155375 | HERVHF_5LTR | - |
| Gorilla_gorilla_gorilla_chr8 | 128155990 | 128157895 | HERVHF_pol  | - |
| Gorilla_gorilla_gorilla_chr8 | 128158191 | 128158514 | HERVHF_gag  | - |
| Gorilla_gorilla_gorilla_chr8 | 128160107 | 128160565 | HERVHF_3LTR | - |
| Gorilla_gorilla_gorilla_chr9 | 9907563   | 9908017   | HERVHF_5LTR | - |
| Gorilla_gorilla_gorilla_chr9 | 9908180   | 9908779   | HERVHF_env  | - |
| Gorilla_gorilla_gorilla_chr9 | 9910819   | 9912948   | HERVHF_pol  | - |
| Gorilla_gorilla_gorilla_chr9 | 9915474   | 9915922   | HERVHF_3LTR | - |
| Gorilla_gorilla_gorilla_chr9 | 15747122  | 15747525  | HERVHF_5LTR | - |
| Gorilla_gorilla_gorilla_chr9 | 15748113  | 15750548  | HERVHF_pol  | - |
| Gorilla_gorilla_gorilla_chr9 | 15752956  | 15753358  | HERVHF_3LTR | - |

|                              |          |          |             |   |
|------------------------------|----------|----------|-------------|---|
| Gorilla_gorilla_gorilla_chr9 | 18805294 | 18805629 | HERVHF_5LTR | + |
| Gorilla_gorilla_gorilla_chr9 | 18807187 | 18807492 | HERVHF_gag  | + |
| Gorilla_gorilla_gorilla_chr9 | 18807754 | 18808359 | HERVHF_pro  | + |
| Gorilla_gorilla_gorilla_chr9 | 18807763 | 18810002 | HERVHF_pol  | + |
| Gorilla_gorilla_gorilla_chr9 | 18810531 | 18810871 | HERVHF_3LTR | + |
| Gorilla_gorilla_gorilla_chr9 | 28522641 | 28523124 | HERVHF_5LTR | - |
| Gorilla_gorilla_gorilla_chr9 | 28523574 | 28525531 | HERVHF_pol  | - |
| Gorilla_gorilla_gorilla_chr9 | 28525340 | 28525927 | HERVHF_pro  | - |
| Gorilla_gorilla_gorilla_chr9 | 28525990 | 28526370 | HERVHF_gag  | - |
| Gorilla_gorilla_gorilla_chr9 | 28528005 | 28528488 | HERVHF_3LTR | - |
| Gorilla_gorilla_gorilla_chr9 | 39422466 | 39422812 | HERVHF_5LTR | - |
| Gorilla_gorilla_gorilla_chr9 | 39423362 | 39425648 | HERVHF_pol  | - |
| Gorilla_gorilla_gorilla_chr9 | 39425085 | 39425867 | HERVHF_pro  | - |
| Gorilla_gorilla_gorilla_chr9 | 39427923 | 39428277 | HERVHF_3LTR | - |
| Gorilla_gorilla_gorilla_chr9 | 47441470 | 47441853 | HERVHF_5LTR | + |
| Gorilla_gorilla_gorilla_chr9 | 47443710 | 47444150 | HERVHF_gag  | + |
| Gorilla_gorilla_gorilla_chr9 | 47444638 | 47446525 | HERVHF_pol  | + |
| Gorilla_gorilla_gorilla_chr9 | 47447030 | 47447400 | HERVHF_3LTR | + |
| Gorilla_gorilla_gorilla_chr9 | 48707230 | 48707643 | HERVHF_5LTR | - |
| Gorilla_gorilla_gorilla_chr9 | 48707927 | 48708390 | HERVHF_env  | - |
| Gorilla_gorilla_gorilla_chr9 | 48709382 | 48710834 | HERVHF_pol  | - |
| Gorilla_gorilla_gorilla_chr9 | 48710271 | 48711011 | HERVHF_pro  | - |
| Gorilla_gorilla_gorilla_chr9 | 48713261 | 48713666 | HERVHF_3LTR | - |
| Gorilla_gorilla_gorilla_chr9 | 53509145 | 53509489 | HERVHF_5LTR | + |
| Gorilla_gorilla_gorilla_chr9 | 53511176 | 53511628 | HERVHF_gag  | + |
| Gorilla_gorilla_gorilla_chr9 | 53511734 | 53512567 | HERVHF_pro  | + |
| Gorilla_gorilla_gorilla_chr9 | 53512025 | 53514155 | HERVHF_pol  | + |
| Gorilla_gorilla_gorilla_chr9 | 53514564 | 53514909 | HERVHF_3LTR | + |
| Gorilla_gorilla_gorilla_chr9 | 56075765 | 56076207 | HERVHF_5LTR | - |
| Gorilla_gorilla_gorilla_chr9 | 56077347 | 56078003 | HERVHF_pol  | - |
| Gorilla_gorilla_gorilla_chr9 | 56077386 | 56078168 | HERVHF_pro  | - |
| Gorilla_gorilla_gorilla_chr9 | 56080195 | 56080639 | HERVHF_3LTR | - |
| Gorilla_gorilla_gorilla_chr9 | 56265057 | 56265406 | HERVHF_5LTR | + |
| Gorilla_gorilla_gorilla_chr9 | 56267488 | 56268234 | HERVHF_pro  | + |
| Gorilla_gorilla_gorilla_chr9 | 56267602 | 56269773 | HERVHF_pol  | + |
| Gorilla_gorilla_gorilla_chr9 | 56270332 | 56270676 | HERVHF_3LTR | + |
| Gorilla_gorilla_gorilla_chr9 | 58886903 | 58887356 | HERVHF_5LTR | + |
| Gorilla_gorilla_gorilla_chr9 | 58889333 | 58889653 | HERVHF_gag  | + |
| Gorilla_gorilla_gorilla_chr9 | 58889657 | 58890460 | HERVHF_pro  | + |
| Gorilla_gorilla_gorilla_chr9 | 58889948 | 58892793 | HERVHF_pol  | + |
| Gorilla_gorilla_gorilla_chr9 | 58894133 | 58894800 | HERVHF_env  | + |
| Gorilla_gorilla_gorilla_chr9 | 58895030 | 58895487 | HERVHF_3LTR | + |
| Gorilla_gorilla_gorilla_chr9 | 60838099 | 60838551 | HERVHF_5LTR | + |
| Gorilla_gorilla_gorilla_chr9 | 60840677 | 60841507 | HERVHF_pro  | + |

|                              |                   |             |   |
|------------------------------|-------------------|-------------|---|
| Gorilla_gorilla_gorilla_chr9 | 60840965 60842834 | HERVHF_pol  | + |
| Gorilla_gorilla_gorilla_chr9 | 60843495 60843950 | HERVHF_3LTR | + |
| Gorilla_gorilla_gorilla_chr9 | 67209654 67210165 | HERVK_5LTR  | - |
| Gorilla_gorilla_gorilla_chr9 | 67211091 67212158 | HERVK_pol   | - |
| Gorilla_gorilla_gorilla_chr9 | 67212100 67212986 | HERVK_pro   | - |
| Gorilla_gorilla_gorilla_chr9 | 67213876 67214391 | HERVK_3LTR  | - |
| Gorilla_gorilla_gorilla_chr9 | 68015197 68015612 | HERVHF_5LTR | + |
| Gorilla_gorilla_gorilla_chr9 | 68017652 68018454 | HERVHF_pro  | + |
| Gorilla_gorilla_gorilla_chr9 | 68018044 68019927 | HERVHF_pol  | + |
| Gorilla_gorilla_gorilla_chr9 | 68020435 68020857 | HERVHF_3LTR | + |
| Gorilla_gorilla_gorilla_chr9 | 73488052 73488478 | HERVHF_5LTR | - |
| Gorilla_gorilla_gorilla_chr9 | 73489061 73491531 | HERVHF_pol  | - |
| Gorilla_gorilla_gorilla_chr9 | 73491010 73491822 | HERVHF_pro  | - |
| Gorilla_gorilla_gorilla_chr9 | 73491826 73492155 | HERVHF_gag  | - |
| Gorilla_gorilla_gorilla_chr9 | 73494024 73494453 | HERVHF_3LTR | - |
| Gorilla_gorilla_gorilla_chr9 | 89278656 89279106 | HERVHF_5LTR | - |
| Gorilla_gorilla_gorilla_chr9 | 89279505 89281644 | HERVHF_pol  | - |
| Gorilla_gorilla_gorilla_chr9 | 89281102 89281935 | HERVHF_pro  | - |
| Gorilla_gorilla_gorilla_chr9 | 89281939 89282352 | HERVHF_gag  | - |
| Gorilla_gorilla_gorilla_chr9 | 89284212 89284654 | HERVHF_3LTR | - |
| Gorilla_gorilla_gorilla_chr9 | 95243427 95243879 | HERVHF_5LTR | + |
| Gorilla_gorilla_gorilla_chr9 | 95245558 95246160 | HERVHF_gag  | + |
| Gorilla_gorilla_gorilla_chr9 | 95246352 95247086 | HERVHF_pro  | + |
| Gorilla_gorilla_gorilla_chr9 | 95246427 95248579 | HERVHF_pol  | + |
| Gorilla_gorilla_gorilla_chr9 | 95248766 95249577 | HERVHF_env  | + |
| Gorilla_gorilla_gorilla_chr9 | 95249741 95250204 | HERVHF_3LTR | + |
| Gorilla_gorilla_gorilla_chr9 | 95841616 95842006 | HERVHF_5LTR | - |
| Gorilla_gorilla_gorilla_chr9 | 95842349 95844534 | HERVHF_pol  | - |
| Gorilla_gorilla_gorilla_chr9 | 95846580 95846948 | HERVHF_3LTR | - |
| Gorilla_gorilla_gorilla_chr9 | 99393015 99393415 | HERVHF_5LTR | - |
| Gorilla_gorilla_gorilla_chr9 | 99394614 99396157 | HERVHF_pol  | - |
| Gorilla_gorilla_gorilla_chr9 | 99395597 99396196 | HERVHF_pro  | - |
| Gorilla_gorilla_gorilla_chr9 | 99396451 99396771 | HERVHF_gag  | - |
| Gorilla_gorilla_gorilla_chr9 | 99398577 99398970 | HERVHF_3LTR | - |
| Gorilla_gorilla_gorilla_chrX | 2802708 2803394   | HERVHF_5LTR | + |
| Gorilla_gorilla_gorilla_chrX | 2805560 2805859   | HERVHF_gag  | + |
| Gorilla_gorilla_gorilla_chrX | 2806308 2808251   | HERVHF_pol  | + |
| Gorilla_gorilla_gorilla_chrX | 2809139 2809835   | HERVHF_3LTR | + |
| Gorilla_gorilla_gorilla_chrX | 10841316 10841737 | HERVHF_5LTR | + |
| Gorilla_gorilla_gorilla_chrX | 10844022 10844471 | HERVHF_pro  | + |
| Gorilla_gorilla_gorilla_chrX | 10844061 10844774 | HERVHF_pol  | + |
| Gorilla_gorilla_gorilla_chrX | 10846580 10847003 | HERVHF_3LTR | + |
| Gorilla_gorilla_gorilla_chrX | 28429616 28430030 | HERVHF_5LTR | - |
| Gorilla_gorilla_gorilla_chrX | 28430613 28432803 | HERVHF_pol  | - |

|                              |           |           |             |   |
|------------------------------|-----------|-----------|-------------|---|
| Gorilla_gorilla_gorilla_chrX | 28432204  | 28432809  | HERVHF_pro  | - |
| Gorilla_gorilla_gorilla_chrX | 28433030  | 28433359  | HERVHF_gag  | - |
| Gorilla_gorilla_gorilla_chrX | 28435074  | 28435490  | HERVHF_3LTR | - |
| Gorilla_gorilla_gorilla_chrX | 58437860  | 58438193  | HERVHF_5LTR | - |
| Gorilla_gorilla_gorilla_chrX | 58438692  | 58440950  | HERVHF_pol  | - |
| Gorilla_gorilla_gorilla_chrX | 58440651  | 58441409  | HERVHF_pro  | - |
| Gorilla_gorilla_gorilla_chrX | 58443271  | 58443595  | HERVHF_3LTR | - |
| Gorilla_gorilla_gorilla_chrX | 58753854  | 58754213  | HERVK_5LTR  | - |
| Gorilla_gorilla_gorilla_chrX | 58754997  | 58756487  | HERVK_pol   | - |
| Gorilla_gorilla_gorilla_chrX | 58756356  | 58757207  | HERVK_pro   | - |
| Gorilla_gorilla_gorilla_chrX | 58758757  | 58759110  | HERVK_3LTR  | - |
| Gorilla_gorilla_gorilla_chrX | 63119094  | 63119435  | HERVHF_5LTR | - |
| Gorilla_gorilla_gorilla_chrX | 63120204  | 63122742  | HERVHF_pol  | - |
| Gorilla_gorilla_gorilla_chrX | 63122314  | 63123099  | HERVHF_pro  | - |
| Gorilla_gorilla_gorilla_chrX | 63123609  | 63123989  | HERVHF_gag  | - |
| Gorilla_gorilla_gorilla_chrX | 63125455  | 63125801  | HERVHF_3LTR | - |
| Gorilla_gorilla_gorilla_chrX | 76046816  | 76047247  | HERVHF_5LTR | + |
| Gorilla_gorilla_gorilla_chrX | 76047961  | 76049347  | HERVHF_gag  | + |
| Gorilla_gorilla_gorilla_chrX | 76049821  | 76052310  | HERVHF_pol  | + |
| Gorilla_gorilla_gorilla_chrX | 76052327  | 76052707  | HERVHF_env  | + |
| Gorilla_gorilla_gorilla_chrX | 76052934  | 76053365  | HERVHF_3LTR | + |
| Gorilla_gorilla_gorilla_chrX | 81105182  | 81105621  | HERVHF_5LTR | + |
| Gorilla_gorilla_gorilla_chrX | 81107753  | 81108076  | HERVHF_gag  | + |
| Gorilla_gorilla_gorilla_chrX | 81108083  | 81108913  | HERVHF_pro  | + |
| Gorilla_gorilla_gorilla_chrX | 81108371  | 81110492  | HERVHF_pol  | + |
| Gorilla_gorilla_gorilla_chrX | 81110902  | 81111335  | HERVHF_3LTR | + |
| Gorilla_gorilla_gorilla_chrX | 85504827  | 85505260  | HERVHF_5LTR | - |
| Gorilla_gorilla_gorilla_chrX | 85505749  | 85507821  | HERVHF_pol  | - |
| Gorilla_gorilla_gorilla_chrX | 85507279  | 85507917  | HERVHF_pro  | - |
| Gorilla_gorilla_gorilla_chrX | 85510114  | 85510547  | HERVHF_3LTR | - |
| Gorilla_gorilla_gorilla_chrX | 85675818  | 85676251  | HERVHF_5LTR | - |
| Gorilla_gorilla_gorilla_chrX | 85676658  | 85678774  | HERVHF_pol  | - |
| Gorilla_gorilla_gorilla_chrX | 85678268  | 85678981  | HERVHF_pro  | - |
| Gorilla_gorilla_gorilla_chrX | 85681157  | 85681596  | HERVHF_3LTR | - |
| Gorilla_gorilla_gorilla_chrX | 88109517  | 88109970  | HERVHF_5LTR | - |
| Gorilla_gorilla_gorilla_chrX | 88110359  | 88112387  | HERVHF_pol  | - |
| Gorilla_gorilla_gorilla_chrX | 88111974  | 88112702  | HERVHF_pro  | - |
| Gorilla_gorilla_gorilla_chrX | 88115344  | 88115794  | HERVHF_3LTR | - |
| Gorilla_gorilla_gorilla_chrX | 102485662 | 102486104 | HERVHF_5LTR | + |
| Gorilla_gorilla_gorilla_chrX | 102487787 | 102488158 | HERVHF_gag  | + |
| Gorilla_gorilla_gorilla_chrX | 102488646 | 102490589 | HERVHF_pol  | + |
| Gorilla_gorilla_gorilla_chrX | 102491035 | 102491476 | HERVHF_3LTR | + |
| Gorilla_gorilla_gorilla_chrX | 103181782 | 103182107 | HERVHF_5LTR | - |
| Gorilla_gorilla_gorilla_chrX | 103182676 | 103183914 | HERVHF_pol  | - |

|                              |           |           |               |   |
|------------------------------|-----------|-----------|---------------|---|
| Gorilla_gorilla_gorilla_chrX | 103183372 | 103184205 | HERVHF_pro    | - |
| Gorilla_gorilla_gorilla_chrX | 103184292 | 103184615 | HERVHF_gag    | - |
| Gorilla_gorilla_gorilla_chrX | 103186162 | 103186494 | HERVHF_3LTR   | - |
| Gorilla_gorilla_gorilla_chrX | 107821522 | 107821824 | HERVHF_5LTR   | + |
| Gorilla_gorilla_gorilla_chrX | 107823648 | 107824061 | HERVHF_gag    | + |
| Gorilla_gorilla_gorilla_chrX | 107824271 | 107824774 | HERVHF_pro    | + |
| Gorilla_gorilla_gorilla_chrX | 107824364 | 107826069 | HERVHF_pol    | + |
| Gorilla_gorilla_gorilla_chrX | 107827046 | 107827350 | HERVHF_3LTR   | + |
| Gorilla_gorilla_gorilla_chrX | 107950558 | 107950953 | HERVHF_5LTR   | - |
| Gorilla_gorilla_gorilla_chrX | 107951784 | 107953646 | HERVHF_pol    | - |
| Gorilla_gorilla_gorilla_chrX | 107953011 | 107953859 | HERVHF_pro    | - |
| Gorilla_gorilla_gorilla_chrX | 107953849 | 107954262 | HERVHF_gag    | - |
| Gorilla_gorilla_gorilla_chrX | 107956083 | 107956459 | HERVHF_3LTR   | - |
| Gorilla_gorilla_gorilla_chrX | 109673555 | 109673910 | HERVHF_5LTR   | + |
| Gorilla_gorilla_gorilla_chrX | 109675065 | 109675643 | HERVHF_pro    | + |
| Gorilla_gorilla_gorilla_chrX | 109675068 | 109677419 | HERVHF_pol    | + |
| Gorilla_gorilla_gorilla_chrX | 109677990 | 109678360 | HERVHF_3LTR   | + |
| Gorilla_gorilla_gorilla_chrX | 110022728 | 110023142 | HERVHF_5LTR   | - |
| Gorilla_gorilla_gorilla_chrX | 110023377 | 110024166 | HERVHF_env    | - |
| Gorilla_gorilla_gorilla_chrX | 110024998 | 110026374 | HERVHF_pol    | - |
| Gorilla_gorilla_gorilla_chrX | 110025910 | 110026539 | HERVHF_pro    | - |
| Gorilla_gorilla_gorilla_chrX | 110026622 | 110027083 | HERVHF_gag    | - |
| Gorilla_gorilla_gorilla_chrX | 110028702 | 110029116 | HERVHF_3LTR   | - |
| Gorilla_gorilla_gorilla_chrX | 115464505 | 115464956 | HERVHF_5LTR   | + |
| Gorilla_gorilla_gorilla_chrX | 115466680 | 115467051 | HERVHF_gag    | + |
| Gorilla_gorilla_gorilla_chrX | 115467427 | 115469318 | HERVHF_pol    | + |
| Gorilla_gorilla_gorilla_chrX | 115469906 | 115470360 | HERVHF_3LTR   | + |
| Gorilla_gorilla_gorilla_chrX | 120150015 | 120150447 | HERVHF_5LTR   | + |
| Gorilla_gorilla_gorilla_chrX | 120152762 | 120153412 | HERVHF_pro    | + |
| Gorilla_gorilla_gorilla_chrX | 120153005 | 120155139 | HERVHF_pol    | + |
| Gorilla_gorilla_gorilla_chrX | 120155558 | 120155994 | HERVHF_3LTR   | + |
| Gorilla_gorilla_gorilla_chrX | 138492261 | 138492603 | HERVHF_5LTR   | - |
| Gorilla_gorilla_gorilla_chrX | 138495350 | 138497218 | HERVHF_pol    | - |
| Gorilla_gorilla_gorilla_chrX | 138497980 | 138498492 | HERVHF_gag    | - |
| Gorilla_gorilla_gorilla_chrX | 138499619 | 138499960 | HERVHF_3LTR   | - |
| Gorilla_gorilla_gorilla_chrX | 142307645 | 142307963 | HSERVIII_5LTR | + |
| Gorilla_gorilla_gorilla_chrX | 142309896 | 142312265 | HSERVIII_pol  | + |
| Gorilla_gorilla_gorilla_chrX | 142314007 | 142314327 | HSERVIII_3LTR | + |
| Gorilla_gorilla_gorilla_chrX | 142542405 | 142542836 | HERVHF_5LTR   | + |
| Gorilla_gorilla_gorilla_chrX | 142545177 | 142545779 | HERVHF_pro    | + |
| Gorilla_gorilla_gorilla_chrX | 142545351 | 142547294 | HERVHF_pol    | + |
| Gorilla_gorilla_gorilla_chrX | 142547743 | 142548174 | HERVHF_3LTR   | + |
| Gorilla_gorilla_gorilla_chrX | 142884484 | 142884913 | HSERVIII_5LTR | - |
| Gorilla_gorilla_gorilla_chrX | 142886002 | 142886837 | HSERVIII_pol  | - |



|                              |           |           |                |   |
|------------------------------|-----------|-----------|----------------|---|
| Gorilla_gorilla_gorilla_chrX | 142888936 | 142889370 | HSERVIII_3LTR  | - |
| Gorilla_gorilla_gorilla_chrX | 146251396 | 146251837 | HERVHF_5LTR    | - |
| Gorilla_gorilla_gorilla_chrX | 146252006 | 146252464 | HERVHF_env     | - |
| Gorilla_gorilla_gorilla_chrX | 146253013 | 146255671 | HERVHF_pol     | - |
| Gorilla_gorilla_gorilla_chrX | 146254916 | 146256052 | HERVHF_pro     | - |
| Gorilla_gorilla_gorilla_chrX | 146256110 | 146256553 | HERVHF_gag     | - |
| Gorilla_gorilla_gorilla_chrX | 146257883 | 146258326 | HERVHF_3LTR    | - |
| Homo_sapiens_1               | 5044808   | 5045144   | HERVHF_5LTR    | + |
| Homo_sapiens_1               | 5046910   | 5047209   | HERVHF_gag     | + |
| Homo_sapiens_1               | 5047327   | 5048160   | HERVHF_pro     | + |
| Homo_sapiens_1               | 5047618   | 5050462   | HERVHF_pol     | + |
| Homo_sapiens_1               | 5051308   | 5052420   | HERVHF_env     | + |
| Homo_sapiens_1               | 5052648   | 5053000   | HERVHF_3LTR    | + |
| Homo_sapiens_1               | 22997488  | 22997912  | HERVHF_5LTR    | - |
| Homo_sapiens_1               | 22998530  | 23001867  | HERVHF_pol     | - |
| Homo_sapiens_1               | 23002236  | 23002547  | HERVHF_gag     | - |
| Homo_sapiens_1               | 23003988  | 23004403  | HERVHF_3LTR    | - |
| Homo_sapiens_1               | 29794213  | 29794559  | HSERVIII_5LTR  | + |
| Homo_sapiens_1               | 29796614  | 29799221  | HSERVIII_pol   | + |
| Homo_sapiens_1               | 29799585  | 29799942  | HSERVIII_3LTR  | + |
| Homo_sapiens_1               | 43085533  | 43085862  | HERVHF_5LTR    | + |
| Homo_sapiens_1               | 43087974  | 43088405  | HERVHF_pro     | + |
| Homo_sapiens_1               | 43088444  | 43090183  | HERVHF_pol     | + |
| Homo_sapiens_1               | 43090771  | 43091095  | HERVHF_3LTR    | + |
| Homo_sapiens_1               | 45753339  | 45753696  | HERVIPADP_5LTR | - |
| Homo_sapiens_1               | 45753845  | 45754408  | HERVIPADP_env  | - |
| Homo_sapiens_1               | 45755745  | 45759131  | HERVIPADP_pol  | - |
| Homo_sapiens_1               | 45759618  | 45760088  | HERVIPADP_gag  | - |
| Homo_sapiens_1               | 45762104  | 45762461  | HERVIPADP_3LTR | - |
| Homo_sapiens_1               | 48208994  | 48209412  | HERVHF_5LTR    | - |
| Homo_sapiens_1               | 48210005  | 48211811  | HERVHF_pol     | - |
| Homo_sapiens_1               | 48211404  | 48211934  | HERVHF_pro     | - |
| Homo_sapiens_1               | 48212350  | 48212661  | HERVHF_gag     | - |
| Homo_sapiens_1               | 48214397  | 48214824  | HERVHF_3LTR    | - |
| Homo_sapiens_1               | 53424323  | 53424768  | HERVHF_5LTR    | + |
| Homo_sapiens_1               | 53426329  | 53426772  | HERVHF_gag     | + |
| Homo_sapiens_1               | 53426865  | 53427605  | HERVHF_pro     | + |
| Homo_sapiens_1               | 53427063  | 53429190  | HERVHF_pol     | + |
| Homo_sapiens_1               | 53429582  | 53430027  | HERVHF_3LTR    | + |
| Homo_sapiens_1               | 64349934  | 64350335  | HERVHF_5LTR    | - |
| Homo_sapiens_1               | 64350908  | 64352931  | HERVHF_pol     | - |
| Homo_sapiens_1               | 64352389  | 64353219  | HERVHF_pro     | - |
| Homo_sapiens_1               | 64353226  | 64353549  | HERVHF_gag     | - |
| Homo_sapiens_1               | 64355311  | 64355699  | HERVHF_3LTR    | - |

|                |           |           |             |   |
|----------------|-----------|-----------|-------------|---|
| Homo_sapiens_1 | 65643205  | 65643638  | HERVHF_5LTR | - |
| Homo_sapiens_1 | 65644171  | 65644827  | HERVHF_pol  | - |
| Homo_sapiens_1 | 65647601  | 65648034  | HERVHF_3LTR | - |
| Homo_sapiens_1 | 68386003  | 68386439  | HERVHF_5LTR | + |
| Homo_sapiens_1 | 68388421  | 68388741  | HERVHF_gag  | + |
| Homo_sapiens_1 | 68389169  | 68391111  | HERVHF_pol  | + |
| Homo_sapiens_1 | 68391558  | 68391994  | HERVHF_3LTR | + |
| Homo_sapiens_1 | 72980444  | 72980898  | HERVHF_5LTR | - |
| Homo_sapiens_1 | 72981316  | 72982805  | HERVHF_pol  | - |
| Homo_sapiens_1 | 72982263  | 72983108  | HERVHF_pro  | - |
| Homo_sapiens_1 | 72983118  | 72983504  | HERVHF_gag  | - |
| Homo_sapiens_1 | 72985037  | 72985491  | HERVHF_3LTR | - |
| Homo_sapiens_1 | 82354581  | 82354965  | HERVHF_5LTR | - |
| Homo_sapiens_1 | 82355816  | 82357821  | HERVHF_pol  | - |
| Homo_sapiens_1 | 82357279  | 82358037  | HERVHF_pro  | - |
| Homo_sapiens_1 | 82360176  | 82360561  | HERVHF_3LTR | - |
| Homo_sapiens_1 | 82955299  | 82955725  | HERVHF_5LTR | + |
| Homo_sapiens_1 | 82957379  | 82957759  | HERVHF_gag  | + |
| Homo_sapiens_1 | 82957868  | 82958632  | HERVHF_pro  | + |
| Homo_sapiens_1 | 82958120  | 82960341  | HERVHF_pol  | + |
| Homo_sapiens_1 | 82961176  | 82961592  | HERVHF_3LTR | + |
| Homo_sapiens_1 | 99509593  | 99509965  | HERVHF_5LTR | + |
| Homo_sapiens_1 | 99511673  | 99512059  | HERVHF_gag  | + |
| Homo_sapiens_1 | 99512102  | 99512932  | HERVHF_pro  | + |
| Homo_sapiens_1 | 99512390  | 99514304  | HERVHF_pol  | + |
| Homo_sapiens_1 | 99515002  | 99515364  | HERVHF_3LTR | + |
| Homo_sapiens_1 | 185948276 | 185948729 | HERVHF_5LTR | - |
| Homo_sapiens_1 | 185949184 | 185951263 | HERVHF_pol  | - |
| Homo_sapiens_1 | 185950721 | 185951554 | HERVHF_pro  | - |
| Homo_sapiens_1 | 185951558 | 185951887 | HERVHF_gag  | - |
| Homo_sapiens_1 | 185953756 | 185954216 | HERVHF_3LTR | - |
| Homo_sapiens_1 | 209448799 | 209449267 | HERVHF_5LTR | + |
| Homo_sapiens_1 | 209451675 | 209453142 | HERVHF_pol  | + |
| Homo_sapiens_1 | 209453552 | 209454012 | HERVHF_3LTR | + |
| Homo_sapiens_1 | 216008143 | 216008555 | HERVHF_5LTR | + |
| Homo_sapiens_1 | 216010479 | 216011309 | HERVHF_pro  | + |
| Homo_sapiens_1 | 216010728 | 216012869 | HERVHF_pol  | + |
| Homo_sapiens_1 | 216013459 | 216013871 | HERVHF_3LTR | + |
| Homo_sapiens_1 | 224840009 | 224840329 | HERVHF_5LTR | - |
| Homo_sapiens_1 | 224841379 | 224843462 | HERVHF_pol  | - |
| Homo_sapiens_1 | 224842881 | 224843657 | HERVHF_pro  | - |
| Homo_sapiens_1 | 224845764 | 224846095 | HERVHF_3LTR | - |
| Homo_sapiens_1 | 228942542 | 228942868 | HERVHF_5LTR | + |
| Homo_sapiens_1 | 228948298 | 228948678 | HERVHF_gag  | + |

|                 |           |           |             |   |
|-----------------|-----------|-----------|-------------|---|
| Homo_sapiens_1  | 228948714 | 228949544 | HERVHF_pro  | + |
| Homo_sapiens_1  | 228948906 | 228950910 | HERVHF_pol  | + |
| Homo_sapiens_1  | 228953920 | 228954247 | HERVHF_3LTR | + |
| Homo_sapiens_1  | 232118097 | 232118574 | HERVHF_5LTR | + |
| Homo_sapiens_1  | 232120241 | 232120654 | HERVHF_gag  | + |
| Homo_sapiens_1  | 232120661 | 232121512 | HERVHF_pro  | + |
| Homo_sapiens_1  | 232120994 | 232122891 | HERVHF_pol  | + |
| Homo_sapiens_1  | 232123477 | 232123943 | HERVHF_3LTR | + |
| Homo_sapiens_1  | 233683447 | 233683884 | HERVHF_5LTR | - |
| Homo_sapiens_1  | 233684292 | 233686399 | HERVHF_pol  | - |
| Homo_sapiens_1  | 233685836 | 233686690 | HERVHF_pro  | - |
| Homo_sapiens_1  | 233686694 | 233687089 | HERVHF_gag  | - |
| Homo_sapiens_1  | 233688771 | 233689205 | HERVHF_3LTR | - |
| Homo_sapiens_1  | 236932314 | 236932745 | HERVHF_5LTR | - |
| Homo_sapiens_1  | 236933317 | 236935221 | HERVHF_pol  | - |
| Homo_sapiens_1  | 236937486 | 236937922 | HERVHF_3LTR | - |
| Homo_sapiens_1  | 241433890 | 241434298 | HERVHF_5LTR | + |
| Homo_sapiens_1  | 241436142 | 241436447 | HERVHF_gag  | + |
| Homo_sapiens_1  | 241436737 | 241439030 | HERVHF_pol  | + |
| Homo_sapiens_1  | 241439482 | 241439885 | HERVHF_3LTR | + |
| Homo_sapiens_10 | 5470767   | 5471180   | HERVHF_5LTR | + |
| Homo_sapiens_10 | 5473577   | 5474398   | HERVHF_pro  | + |
| Homo_sapiens_10 | 5473877   | 5476210   | HERVHF_pol  | + |
| Homo_sapiens_10 | 5476605   | 5477017   | HERVHF_3LTR | + |
| Homo_sapiens_10 | 6629574   | 6629975   | HERVHF_5LTR | - |
| Homo_sapiens_10 | 6630451   | 6632563   | HERVHF_pol  | - |
| Homo_sapiens_10 | 6632024   | 6632854   | HERVHF_pro  | - |
| Homo_sapiens_10 | 6632887   | 6633267   | HERVHF_gag  | - |
| Homo_sapiens_10 | 6635084   | 6635498   | HERVHF_3LTR | - |
| Homo_sapiens_10 | 6797081   | 6797535   | HERVHF_5LTR | - |
| Homo_sapiens_10 | 6798366   | 6799928   | HERVHF_pol  | - |
| Homo_sapiens_10 | 6800444   | 6800767   | HERVHF_gag  | - |
| Homo_sapiens_10 | 6802501   | 6802954   | HERVHF_3LTR | - |
| Homo_sapiens_10 | 20119202  | 20119613  | HERVHF_5LTR | - |
| Homo_sapiens_10 | 20119622  | 20119983  | HERVHF_env  | - |
| Homo_sapiens_10 | 20120056  | 20122028  | HERVHF_pol  | - |
| Homo_sapiens_10 | 20121588  | 20122169  | HERVHF_pro  | - |
| Homo_sapiens_10 | 20124529  | 20124935  | HERVHF_3LTR | - |
| Homo_sapiens_10 | 25716420  | 25716834  | HERVHF_5LTR | + |
| Homo_sapiens_10 | 25718477  | 25718863  | HERVHF_gag  | + |
| Homo_sapiens_10 | 25718959  | 25719759  | HERVHF_pro  | + |
| Homo_sapiens_10 | 25719121  | 25721515  | HERVHF_pol  | + |
| Homo_sapiens_10 | 25722171  | 25722503  | HERVHF_env  | + |
| Homo_sapiens_10 | 25722512  | 25722928  | HERVHF_3LTR | + |

|                 |          |          |               |   |
|-----------------|----------|----------|---------------|---|
| Homo_sapiens_10 | 52033754 | 52034207 | HERVHF_5LTR   | - |
| Homo_sapiens_10 | 52035036 | 52036733 | HERVHF_pol    | - |
| Homo_sapiens_10 | 52036137 | 52036940 | HERVHF_pro    | - |
| Homo_sapiens_10 | 52039108 | 52039561 | HERVHF_3LTR   | - |
| Homo_sapiens_10 | 53492722 | 53493177 | HERVHF_5LTR   | - |
| Homo_sapiens_10 | 53496219 | 53502000 | HERVHF_pol    | - |
| Homo_sapiens_10 | 53501458 | 53502291 | HERVHF_pro    | - |
| Homo_sapiens_10 | 53502295 | 53502840 | HERVHF_gag    | - |
| Homo_sapiens_10 | 53504276 | 53504729 | HERVHF_3LTR   | - |
| Homo_sapiens_10 | 54166675 | 54167112 | HERVHF_5LTR   | + |
| Homo_sapiens_10 | 54168818 | 54169180 | HERVHF_gag    | + |
| Homo_sapiens_10 | 54169315 | 54170037 | HERVHF_pro    | + |
| Homo_sapiens_10 | 54169522 | 54170855 | HERVHF_pol    | + |
| Homo_sapiens_10 | 54172055 | 54172503 | HERVHF_3LTR   | + |
| Homo_sapiens_10 | 58860993 | 58861449 | HERVHF_5LTR   | - |
| Homo_sapiens_10 | 58861899 | 58863758 | HERVHF_pol    | - |
| Homo_sapiens_10 | 58863441 | 58864226 | HERVHF_pro    | - |
| Homo_sapiens_10 | 58864277 | 58864600 | HERVHF_gag    | - |
| Homo_sapiens_10 | 58866879 | 58867332 | HERVHF_3LTR   | - |
| Homo_sapiens_10 | 83971226 | 83971628 | HSERVIII_5LTR | - |
| Homo_sapiens_10 | 83972540 | 83975072 | HSERVIII_pol  | - |
| Homo_sapiens_10 | 83977372 | 83977778 | HSERVIII_3LTR | - |
| Homo_sapiens_10 | 90807289 | 90807739 | HERVHF_5LTR   | + |
| Homo_sapiens_10 | 90809488 | 90809808 | HERVHF_gag    | + |
| Homo_sapiens_10 | 90809949 | 90810713 | HERVHF_pro    | + |
| Homo_sapiens_10 | 90810192 | 90812217 | HERVHF_pol    | + |
| Homo_sapiens_10 | 90812810 | 90813260 | HERVHF_3LTR   | + |
| Homo_sapiens_10 | 96732986 | 96733309 | HERVHF_5LTR   | + |
| Homo_sapiens_10 | 96734365 | 96734688 | HERVHF_gag    | + |
| Homo_sapiens_10 | 96734725 | 96735498 | HERVHF_pro    | + |
| Homo_sapiens_10 | 96735169 | 96735654 | HERVHF_pol    | + |
| Homo_sapiens_10 | 96736169 | 96736493 | HERVHF_3LTR   | + |
| Homo_sapiens_11 | 5160295  | 5160710  | HERVHF_5LTR   | - |
| Homo_sapiens_11 | 5161282  | 5163250  | HERVHF_pol    | - |
| Homo_sapiens_11 | 5163544  | 5163885  | HERVHF_gag    | - |
| Homo_sapiens_11 | 5165704  | 5166118  | HERVHF_3LTR   | - |
| Homo_sapiens_11 | 6366039  | 6366440  | HERVHF_5LTR   | + |
| Homo_sapiens_11 | 6367846  | 6368226  | HERVHF_gag    | + |
| Homo_sapiens_11 | 6368676  | 6370836  | HERVHF_pol    | + |
| Homo_sapiens_11 | 6371260  | 6371662  | HERVHF_3LTR   | + |
| Homo_sapiens_11 | 20567867 | 20568314 | HERVHF_5LTR   | + |
| Homo_sapiens_11 | 20569935 | 20570264 | HERVHF_gag    | + |
| Homo_sapiens_11 | 20570594 | 20571798 | HERVHF_pol    | + |
| Homo_sapiens_11 | 20572198 | 20572650 | HERVHF_3LTR   | + |

|                 |           |           |             |   |
|-----------------|-----------|-----------|-------------|---|
| Homo_sapiens_11 | 23183932  | 23184385  | HERVHF_5LTR | - |
| Homo_sapiens_11 | 23184617  | 23186805  | HERVHF_pol  | - |
| Homo_sapiens_11 | 23187199  | 23187528  | HERVHF_gag  | - |
| Homo_sapiens_11 | 23189291  | 23189744  | HERVHF_3LTR | - |
| Homo_sapiens_11 | 23887274  | 23887605  | HERVHF_5LTR | - |
| Homo_sapiens_11 | 23888260  | 23890252  | HERVHF_pol  | - |
| Homo_sapiens_11 | 23889644  | 23890357  | HERVHF_pro  | - |
| Homo_sapiens_11 | 23890442  | 23890987  | HERVHF_gag  | - |
| Homo_sapiens_11 | 23892534  | 23892864  | HERVHF_3LTR | - |
| Homo_sapiens_11 | 27629072  | 27629528  | HERVHF_5LTR | - |
| Homo_sapiens_11 | 27630027  | 27632049  | HERVHF_pol  | - |
| Homo_sapiens_11 | 27631507  | 27632340  | HERVHF_pro  | - |
| Homo_sapiens_11 | 27632416  | 27632889  | HERVHF_gag  | - |
| Homo_sapiens_11 | 27634477  | 27634938  | HERVHF_3LTR | - |
| Homo_sapiens_11 | 94641661  | 94642011  | HERVHF_5LTR | + |
| Homo_sapiens_11 | 94644136  | 94644915  | HERVHF_pro  | + |
| Homo_sapiens_11 | 94644373  | 94646313  | HERVHF_pol  | + |
| Homo_sapiens_11 | 94646973  | 94647315  | HERVHF_3LTR | + |
| Homo_sapiens_11 | 95309405  | 95309899  | HERVHF_5LTR | + |
| Homo_sapiens_11 | 95312049  | 95312846  | HERVHF_pro  | + |
| Homo_sapiens_11 | 95312283  | 95315121  | HERVHF_pol  | + |
| Homo_sapiens_11 | 95315995  | 95317167  | HERVHF_env  | + |
| Homo_sapiens_11 | 95317333  | 95317806  | HERVHF_3LTR | + |
| Homo_sapiens_11 | 96499960  | 96500271  | HERVHF_5LTR | + |
| Homo_sapiens_11 | 96501014  | 96501424  | HERVHF_gag  | + |
| Homo_sapiens_11 | 96501726  | 96502403  | HERVHF_pro  | + |
| Homo_sapiens_11 | 96501900  | 96504947  | HERVHF_pol  | + |
| Homo_sapiens_11 | 96506073  | 96506627  | HERVHF_env  | + |
| Homo_sapiens_11 | 96507611  | 96507918  | HERVHF_3LTR | + |
| Homo_sapiens_11 | 96587635  | 96588088  | HERVHF_5LTR | + |
| Homo_sapiens_11 | 96590439  | 96591233  | HERVHF_pro  | + |
| Homo_sapiens_11 | 96590598  | 96592771  | HERVHF_pol  | + |
| Homo_sapiens_11 | 96593224  | 96593677  | HERVHF_3LTR | + |
| Homo_sapiens_11 | 121637355 | 121637761 | HERVHF_5LTR | - |
| Homo_sapiens_11 | 121638255 | 121640933 | HERVHF_pol  | - |
| Homo_sapiens_11 | 121640352 | 121641194 | HERVHF_pro  | - |
| Homo_sapiens_11 | 121643108 | 121643516 | HERVHF_3LTR | - |
| Homo_sapiens_11 | 130564387 | 130564827 | HERVHF_5LTR | - |
| Homo_sapiens_11 | 130565609 | 130567330 | HERVHF_pol  | - |
| Homo_sapiens_11 | 130566809 | 130567627 | HERVHF_pro  | - |
| Homo_sapiens_11 | 130569681 | 130570121 | HERVHF_3LTR | - |
| Homo_sapiens_11 | 130753494 | 130753946 | HERVHF_5LTR | - |
| Homo_sapiens_11 | 130754355 | 130756582 | HERVHF_pol  | - |
| Homo_sapiens_11 | 130755941 | 130756702 | HERVHF_pro  | - |

|                 |           |           |             |   |
|-----------------|-----------|-----------|-------------|---|
| Homo_sapiens_11 | 130758681 | 130759137 | HERVHF_3LTR | - |
| Homo_sapiens_12 | 4018623   | 4018993   | HERVHF_5LTR | + |
| Homo_sapiens_12 | 4020593   | 4021006   | HERVHF_gag  | + |
| Homo_sapiens_12 | 4021003   | 4021665   | HERVHF_pro  | + |
| Homo_sapiens_12 | 4021511   | 4022836   | HERVHF_pol  | + |
| Homo_sapiens_12 | 4023325   | 4023691   | HERVHF_3LTR | + |
| Homo_sapiens_12 | 11462168  | 11462625  | HERVHF_5LTR | - |
| Homo_sapiens_12 | 11463071  | 11465137  | HERVHF_pol  | - |
| Homo_sapiens_12 | 11467569  | 11468022  | HERVHF_3LTR | - |
| Homo_sapiens_12 | 14705418  | 14705902  | HERVHF_5LTR | - |
| Homo_sapiens_12 | 14706356  | 14707614  | HERVHF_pol  | - |
| Homo_sapiens_12 | 14707324  | 14708130  | HERVHF_pro  | - |
| Homo_sapiens_12 | 14710153  | 14710640  | HERVHF_3LTR | - |
| Homo_sapiens_12 | 17021894  | 17022331  | HERVHF_5LTR | - |
| Homo_sapiens_12 | 17022907  | 17024592  | HERVHF_pol  | - |
| Homo_sapiens_12 | 17024305  | 17024766  | HERVHF_pro  | - |
| Homo_sapiens_12 | 17024994  | 17025293  | HERVHF_gag  | - |
| Homo_sapiens_12 | 17026933  | 17027366  | HERVHF_3LTR | - |
| Homo_sapiens_12 | 25163213  | 25163629  | HERVHF_5LTR | + |
| Homo_sapiens_12 | 25165679  | 25166455  | HERVHF_pro  | + |
| Homo_sapiens_12 | 25165913  | 25167195  | HERVHF_pol  | + |
| Homo_sapiens_12 | 25168018  | 25168876  | HERVHF_env  | + |
| Homo_sapiens_12 | 25169104  | 25169518  | HERVHF_3LTR | + |
| Homo_sapiens_12 | 34265635  | 34266029  | HERVHF_5LTR | + |
| Homo_sapiens_12 | 34267793  | 34268113  | HERVHF_gag  | + |
| Homo_sapiens_12 | 34268166  | 34268759  | HERVHF_pro  | + |
| Homo_sapiens_12 | 34269097  | 34271546  | HERVHF_pol  | + |
| Homo_sapiens_12 | 34272421  | 34273596  | HERVHF_env  | + |
| Homo_sapiens_12 | 34273840  | 34274242  | HERVHF_3LTR | + |
| Homo_sapiens_12 | 47443338  | 47443848  | HERVK_5LTR  | - |
| Homo_sapiens_12 | 47443928  | 47444233  | HERVK_env   | - |
| Homo_sapiens_12 | 47445250  | 47446577  | HERVK_pol   | - |
| Homo_sapiens_12 | 47446574  | 47447479  | HERVK_pro   | - |
| Homo_sapiens_12 | 47447380  | 47448135  | HERVK_gag   | - |
| Homo_sapiens_12 | 47448256  | 47448766  | HERVK_3LTR  | - |
| Homo_sapiens_12 | 67766803  | 67767256  | HERVHF_5LTR | - |
| Homo_sapiens_12 | 67767662  | 67769614  | HERVHF_pol  | - |
| Homo_sapiens_12 | 67769075  | 67769905  | HERVHF_pro  | - |
| Homo_sapiens_12 | 67769949  | 67770458  | HERVHF_gag  | - |
| Homo_sapiens_12 | 67771894  | 67772346  | HERVHF_3LTR | - |
| Homo_sapiens_12 | 70444894  | 70445309  | HERVK_5LTR  | - |
| Homo_sapiens_12 | 70445322  | 70447607  | HERVK_pol   | - |
| Homo_sapiens_12 | 70448002  | 70448352  | HERVK_pro   | - |
| Homo_sapiens_12 | 70448376  | 70448912  | HERVK_gag   | - |

|                 |          |          |             |   |
|-----------------|----------|----------|-------------|---|
| Homo_sapiens_12 | 70449682 | 70450107 | HERVK_3LTR  | - |
| Homo_sapiens_12 | 72703213 | 72703674 | HERVHF_5LTR | + |
| Homo_sapiens_12 | 72705496 | 72705825 | HERVHF_gag  | + |
| Homo_sapiens_12 | 72705877 | 72706662 | HERVHF_pro  | + |
| Homo_sapiens_12 | 72706120 | 72708178 | HERVHF_pol  | + |
| Homo_sapiens_12 | 72708522 | 72708968 | HERVHF_3LTR | + |
| Homo_sapiens_12 | 80783118 | 80783525 | HERVHF_5LTR | - |
| Homo_sapiens_12 | 80784110 | 80786049 | HERVHF_pol  | - |
| Homo_sapiens_12 | 80788486 | 80788889 | HERVHF_3LTR | - |
| Homo_sapiens_12 | 86938732 | 86939134 | HERVHF_5LTR | + |
| Homo_sapiens_12 | 86940952 | 86941275 | HERVHF_gag  | + |
| Homo_sapiens_12 | 86941530 | 86943723 | HERVHF_pol  | + |
| Homo_sapiens_12 | 86944355 | 86944748 | HERVHF_3LTR | + |
| Homo_sapiens_12 | 87907283 | 87907629 | HERVHF_5LTR | - |
| Homo_sapiens_12 | 87908125 | 87910418 | HERVHF_pol  | - |
| Homo_sapiens_12 | 87909852 | 87910454 | HERVHF_pro  | - |
| Homo_sapiens_12 | 87912483 | 87912826 | HERVHF_3LTR | - |
| Homo_sapiens_12 | 99715184 | 99715598 | HERVHF_5LTR | + |
| Homo_sapiens_12 | 99717322 | 99717633 | HERVHF_gag  | + |
| Homo_sapiens_12 | 99718271 | 99720738 | HERVHF_pol  | + |
| Homo_sapiens_12 | 99721328 | 99721742 | HERVHF_3LTR | + |
| Homo_sapiens_13 | 36316404 | 36316772 | HERVHF_5LTR | + |
| Homo_sapiens_13 | 36318589 | 36318918 | HERVHF_gag  | + |
| Homo_sapiens_13 | 36319082 | 36321288 | HERVHF_pol  | + |
| Homo_sapiens_13 | 36321823 | 36322191 | HERVHF_3LTR | + |
| Homo_sapiens_13 | 42868001 | 42868452 | HERVHF_5LTR | - |
| Homo_sapiens_13 | 42869058 | 42870339 | HERVHF_pol  | - |
| Homo_sapiens_13 | 42869842 | 42870594 | HERVHF_pro  | - |
| Homo_sapiens_13 | 42870678 | 42871007 | HERVHF_gag  | - |
| Homo_sapiens_13 | 42872701 | 42873158 | HERVHF_3LTR | - |
| Homo_sapiens_13 | 48866771 | 48867093 | HERVHF_5LTR | - |
| Homo_sapiens_13 | 48868555 | 48870047 | HERVHF_pol  | - |
| Homo_sapiens_13 | 48869643 | 48870272 | HERVHF_pro  | - |
| Homo_sapiens_13 | 48872132 | 48872457 | HERVHF_3LTR | - |
| Homo_sapiens_13 | 51169866 | 51170315 | HERVHF_5LTR | + |
| Homo_sapiens_13 | 51172014 | 51172343 | HERVHF_gag  | + |
| Homo_sapiens_13 | 51172529 | 51173197 | HERVHF_pro  | + |
| Homo_sapiens_13 | 51172592 | 51174102 | HERVHF_pol  | + |
| Homo_sapiens_13 | 51174556 | 51175008 | HERVHF_3LTR | + |
| Homo_sapiens_13 | 54127417 | 54127817 | HERVHF_5LTR | - |
| Homo_sapiens_13 | 54128407 | 54130751 | HERVHF_pol  | - |
| Homo_sapiens_13 | 54130113 | 54130865 | HERVHF_pro  | - |
| Homo_sapiens_13 | 54130954 | 54131292 | HERVHF_gag  | - |
| Homo_sapiens_13 | 54132759 | 54133159 | HERVHF_3LTR | - |

|                 |          |          |             |   |
|-----------------|----------|----------|-------------|---|
| Homo_sapiens_13 | 61205681 | 61206085 | HERVHF_5LTR | + |
| Homo_sapiens_13 | 61207480 | 61208130 | HERVHF_pro  | + |
| Homo_sapiens_13 | 61207483 | 61210430 | HERVHF_pol  | + |
| Homo_sapiens_13 | 61210874 | 61211281 | HERVHF_3LTR | + |
| Homo_sapiens_13 | 66141327 | 66141765 | HERVHF_5LTR | - |
| Homo_sapiens_13 | 66142250 | 66144110 | HERVHF_pol  | - |
| Homo_sapiens_13 | 66144597 | 66144917 | HERVHF_gag  | - |
| Homo_sapiens_13 | 66146605 | 66147037 | HERVHF_3LTR | - |
| Homo_sapiens_13 | 79274081 | 79274498 | HERVHF_5LTR | + |
| Homo_sapiens_13 | 79276195 | 79276509 | HERVHF_gag  | + |
| Homo_sapiens_13 | 79276611 | 79277441 | HERVHF_pro  | + |
| Homo_sapiens_13 | 79276860 | 79278376 | HERVHF_pol  | + |
| Homo_sapiens_13 | 79279414 | 79279830 | HERVHF_3LTR | + |
| Homo_sapiens_13 | 81866091 | 81866506 | HERVHF_5LTR | + |
| Homo_sapiens_13 | 81868327 | 81868650 | HERVHF_gag  | + |
| Homo_sapiens_13 | 81868974 | 81871097 | HERVHF_pol  | + |
| Homo_sapiens_13 | 81872008 | 81872439 | HERVHF_3LTR | + |
| Homo_sapiens_13 | 83908302 | 83908634 | HERVHF_5LTR | - |
| Homo_sapiens_13 | 83909136 | 83911198 | HERVHF_pol  | - |
| Homo_sapiens_13 | 83910707 | 83911537 | HERVHF_pro  | - |
| Homo_sapiens_13 | 83911541 | 83911954 | HERVHF_gag  | - |
| Homo_sapiens_13 | 83913411 | 83913744 | HERVHF_3LTR | - |
| Homo_sapiens_13 | 86358167 | 86358624 | HERVHF_5LTR | + |
| Homo_sapiens_13 | 86361185 | 86363252 | HERVHF_pol  | + |
| Homo_sapiens_13 | 86363686 | 86364142 | HERVHF_3LTR | + |
| Homo_sapiens_13 | 87186451 | 87186859 | HERVHF_5LTR | - |
| Homo_sapiens_13 | 87187274 | 87189334 | HERVHF_pol  | - |
| Homo_sapiens_13 | 87189687 | 87190013 | HERVHF_gag  | - |
| Homo_sapiens_13 | 87191714 | 87192109 | HERVHF_3LTR | - |
| Homo_sapiens_14 | 38190635 | 38191085 | HERVHF_5LTR | + |
| Homo_sapiens_14 | 38193319 | 38194104 | HERVHF_pro  | + |
| Homo_sapiens_14 | 38193562 | 38195486 | HERVHF_pol  | + |
| Homo_sapiens_14 | 38196077 | 38196529 | HERVHF_3LTR | + |
| Homo_sapiens_14 | 41515866 | 41516322 | HERVHF_5LTR | + |
| Homo_sapiens_14 | 41518090 | 41519277 | HERVHF_pro  | + |
| Homo_sapiens_14 | 41518714 | 41520810 | HERVHF_pol  | + |
| Homo_sapiens_14 | 41521426 | 41521883 | HERVHF_3LTR | + |
| Homo_sapiens_14 | 46544005 | 46544467 | HERVHF_5LTR | + |
| Homo_sapiens_14 | 46546394 | 46547224 | HERVHF_pro  | + |
| Homo_sapiens_14 | 46546685 | 46548638 | HERVHF_pol  | + |
| Homo_sapiens_14 | 46549199 | 46549670 | HERVHF_3LTR | + |
| Homo_sapiens_14 | 48255191 | 48255959 | HERVHF_5LTR | - |
| Homo_sapiens_14 | 48256057 | 48258390 | HERVHF_pol  | - |
| Homo_sapiens_14 | 48257788 | 48258639 | HERVHF_pro  | - |



|                 |           |           |             |   |
|-----------------|-----------|-----------|-------------|---|
| Homo_sapiens_14 | 48262389  | 48263146  | HERVHF_3LTR | - |
| Homo_sapiens_14 | 61133252  | 61133644  | HERVHF_5LTR | - |
| Homo_sapiens_14 | 61134097  | 61136254  | HERVHF_pol  | - |
| Homo_sapiens_14 | 61136685  | 61137125  | HERVHF_gag  | - |
| Homo_sapiens_14 | 61138770  | 61139158  | HERVHF_3LTR | - |
| Homo_sapiens_14 | 73703338  | 73703770  | HERVHF_5LTR | + |
| Homo_sapiens_14 | 73705638  | 73705967  | HERVHF_gag  | + |
| Homo_sapiens_14 | 73705971  | 73706774  | HERVHF_pro  | + |
| Homo_sapiens_14 | 73706169  | 73708378  | HERVHF_pol  | + |
| Homo_sapiens_14 | 73708783  | 73709215  | HERVHF_3LTR | + |
| Homo_sapiens_14 | 84500245  | 84500672  | HERVHF_5LTR | - |
| Homo_sapiens_14 | 84501242  | 84503182  | HERVHF_pol  | - |
| Homo_sapiens_14 | 84503495  | 84503878  | HERVHF_gag  | - |
| Homo_sapiens_14 | 84505560  | 84505980  | HERVHF_3LTR | - |
| Homo_sapiens_14 | 85732429  | 85732842  | HERVHF_5LTR | - |
| Homo_sapiens_14 | 85733748  | 85735805  | HERVHF_pol  | - |
| Homo_sapiens_14 | 85736263  | 85736574  | HERVHF_gag  | - |
| Homo_sapiens_14 | 85738185  | 85738601  | HERVHF_3LTR | - |
| Homo_sapiens_14 | 98985205  | 98985687  | HERVHF_5LTR | + |
| Homo_sapiens_14 | 98987259  | 98987642  | HERVHF_gag  | + |
| Homo_sapiens_14 | 98987678  | 98988508  | HERVHF_pro  | + |
| Homo_sapiens_14 | 98987966  | 98990051  | HERVHF_pol  | + |
| Homo_sapiens_14 | 98991701  | 98992300  | HERVHF_env  | + |
| Homo_sapiens_14 | 98992460  | 98992942  | HERVHF_3LTR | + |
| Homo_sapiens_14 | 101305252 | 101305655 | HERVHF_5LTR | - |
| Homo_sapiens_14 | 101306514 | 101308678 | HERVHF_pol  | - |
| Homo_sapiens_14 | 101308139 | 101308915 | HERVHF_pro  | - |
| Homo_sapiens_14 | 101310847 | 101311248 | HERVHF_3LTR | - |
| Homo_sapiens_15 | 35238617  | 35239062  | HERVHF_5LTR | + |
| Homo_sapiens_15 | 35240917  | 35241246  | HERVHF_gag  | + |
| Homo_sapiens_15 | 35241328  | 35242059  | HERVHF_pro  | + |
| Homo_sapiens_15 | 35241445  | 35242812  | HERVHF_pol  | + |
| Homo_sapiens_15 | 35243404  | 35243837  | HERVHF_3LTR | + |
| Homo_sapiens_15 | 49698516  | 49698929  | HERVHF_5LTR | - |
| Homo_sapiens_15 | 49699097  | 49699860  | HERVHF_env  | - |
| Homo_sapiens_15 | 49700775  | 49702106  | HERVHF_pol  | - |
| Homo_sapiens_15 | 49704343  | 49704756  | HERVHF_3LTR | - |
| Homo_sapiens_15 | 53426844  | 53427278  | HERVHF_5LTR | - |
| Homo_sapiens_15 | 53427887  | 53429671  | HERVHF_pol  | - |
| Homo_sapiens_15 | 53432030  | 53432463  | HERVHF_3LTR | - |
| Homo_sapiens_15 | 74354141  | 74354539  | HERVHF_5LTR | + |
| Homo_sapiens_15 | 74355965  | 74356405  | HERVHF_gag  | + |
| Homo_sapiens_15 | 74356488  | 74357237  | HERVHF_pro  | + |
| Homo_sapiens_15 | 74356599  | 74358842  | HERVHF_pol  | + |

|                 |          |          |             |   |
|-----------------|----------|----------|-------------|---|
| Homo_sapiens_15 | 74359383 | 74359786 | HERVHF_3LTR | + |
| Homo_sapiens_15 | 87831107 | 87831557 | HERVHF_5LTR | + |
| Homo_sapiens_15 | 87833733 | 87834578 | HERVHF_pro  | + |
| Homo_sapiens_15 | 87833994 | 87835340 | HERVHF_pol  | + |
| Homo_sapiens_15 | 87836573 | 87837024 | HERVHF_3LTR | + |
| Homo_sapiens_15 | 94755298 | 94755669 | HERVHF_5LTR | + |
| Homo_sapiens_15 | 94756514 | 94756834 | HERVHF_gag  | + |
| Homo_sapiens_15 | 94756948 | 94757781 | HERVHF_pro  | + |
| Homo_sapiens_15 | 94757239 | 94759185 | HERVHF_pol  | + |
| Homo_sapiens_15 | 94759210 | 94759572 | HERVHF_3LTR | + |
| Homo_sapiens_16 | 60078536 | 60078989 | HERVHF_5LTR | + |
| Homo_sapiens_16 | 60080893 | 60081216 | HERVHF_gag  | + |
| Homo_sapiens_16 | 60081323 | 60082141 | HERVHF_pro  | + |
| Homo_sapiens_16 | 60081599 | 60083447 | HERVHF_pol  | + |
| Homo_sapiens_16 | 60084128 | 60084582 | HERVHF_3LTR | + |
| Homo_sapiens_16 | 65229803 | 65230258 | HERVHF_5LTR | - |
| Homo_sapiens_16 | 65231100 | 65232797 | HERVHF_pol  | - |
| Homo_sapiens_16 | 65232255 | 65233088 | HERVHF_pro  | - |
| Homo_sapiens_16 | 65233092 | 65233421 | HERVHF_gag  | - |
| Homo_sapiens_16 | 65234898 | 65235350 | HERVHF_3LTR | - |
| Homo_sapiens_16 | 86278096 | 86278535 | HERVHF_5LTR | + |
| Homo_sapiens_16 | 86279128 | 86279901 | HERVHF_pro  | + |
| Homo_sapiens_16 | 86279209 | 86279865 | HERVHF_pol  | + |
| Homo_sapiens_16 | 86280230 | 86280676 | HERVHF_env  | + |
| Homo_sapiens_16 | 86280838 | 86281288 | HERVHF_3LTR | + |
| Homo_sapiens_17 | 34183197 | 34183525 | HERVHF_5LTR | + |
| Homo_sapiens_17 | 34185335 | 34185751 | HERVHF_gag  | + |
| Homo_sapiens_17 | 34185803 | 34186567 | HERVHF_pro  | + |
| Homo_sapiens_17 | 34185950 | 34187742 | HERVHF_pol  | + |
| Homo_sapiens_17 | 34188574 | 34188906 | HERVHF_3LTR | + |
| Homo_sapiens_18 | 28693028 | 28693465 | HERVHF_5LTR | - |
| Homo_sapiens_18 | 28694048 | 28696068 | HERVHF_pol  | - |
| Homo_sapiens_18 | 28696387 | 28696686 | HERVHF_gag  | - |
| Homo_sapiens_18 | 28698449 | 28698882 | HERVHF_3LTR | - |
| Homo_sapiens_18 | 56415436 | 56415887 | HERVHF_5LTR | + |
| Homo_sapiens_18 | 56417745 | 56418068 | HERVHF_gag  | + |
| Homo_sapiens_18 | 56418362 | 56420489 | HERVHF_pol  | + |
| Homo_sapiens_18 | 56420893 | 56421344 | HERVHF_3LTR | + |
| Homo_sapiens_18 | 57064647 | 57065099 | HERVHF_5LTR | - |
| Homo_sapiens_18 | 57065267 | 57065866 | HERVHF_env  | - |
| Homo_sapiens_18 | 57067308 | 57069458 | HERVHF_pol  | - |
| Homo_sapiens_18 | 57069033 | 57069632 | HERVHF_pro  | - |
| Homo_sapiens_18 | 57069916 | 57070296 | HERVHF_gag  | - |
| Homo_sapiens_18 | 57072050 | 57072502 | HERVHF_3LTR | - |

|                 |          |          |             |   |
|-----------------|----------|----------|-------------|---|
| Homo_sapiens_18 | 73324612 | 73325047 | HERVHF_5LTR | + |
| Homo_sapiens_18 | 73327171 | 73327950 | HERVHF_pro  | + |
| Homo_sapiens_18 | 73327408 | 73329488 | HERVHF_pol  | + |
| Homo_sapiens_18 | 73329931 | 73330369 | HERVHF_3LTR | + |
| Homo_sapiens_19 | 22568269 | 22568753 | HERVHF_5LTR | + |
| Homo_sapiens_19 | 22571012 | 22573853 | HERVHF_pol  | + |
| Homo_sapiens_19 | 22574536 | 22575022 | HERVHF_3LTR | + |
| Homo_sapiens_19 | 47049861 | 47050298 | HERVHF_5LTR | - |
| Homo_sapiens_19 | 47051098 | 47052722 | HERVHF_pol  | - |
| Homo_sapiens_19 | 47052243 | 47052776 | HERVHF_pro  | - |
| Homo_sapiens_19 | 47053047 | 47053558 | HERVHF_gag  | - |
| Homo_sapiens_19 | 47054979 | 47055419 | HERVHF_3LTR | - |
| Homo_sapiens_19 | 47392829 | 47393271 | HERVHF_5LTR | + |
| Homo_sapiens_19 | 47395198 | 47395506 | HERVHF_gag  | + |
| Homo_sapiens_19 | 47395759 | 47396322 | HERVHF_pro  | + |
| Homo_sapiens_19 | 47395765 | 47397689 | HERVHF_pol  | + |
| Homo_sapiens_19 | 47398316 | 47398759 | HERVHF_3LTR | + |
| Homo_sapiens_19 | 53831404 | 53831857 | HERVHF_5LTR | + |
| Homo_sapiens_19 | 53833245 | 53833670 | HERVHF_gag  | + |
| Homo_sapiens_19 | 53834067 | 53834912 | HERVHF_pro  | + |
| Homo_sapiens_19 | 53834274 | 53836445 | HERVHF_pol  | + |
| Homo_sapiens_19 | 53836889 | 53837351 | HERVHF_3LTR | + |
| Homo_sapiens_19 | 54894295 | 54894715 | HERVHF_5LTR | - |
| Homo_sapiens_19 | 54895547 | 54897591 | HERVHF_pol  | - |
| Homo_sapiens_19 | 54897602 | 54898156 | HERVHF_pro  | - |
| Homo_sapiens_19 | 54900183 | 54900598 | HERVHF_3LTR | - |
| Homo_sapiens_2  | 5000768  | 5001218  | HERVHF_5LTR | + |
| Homo_sapiens_2  | 5003044  | 5003355  | HERVHF_gag  | + |
| Homo_sapiens_2  | 5003462  | 5004271  | HERVHF_pro  | + |
| Homo_sapiens_2  | 5003750  | 5005875  | HERVHF_pol  | + |
| Homo_sapiens_2  | 5006279  | 5006732  | HERVHF_3LTR | + |
| Homo_sapiens_2  | 16791950 | 16792379 | HERVHF_5LTR | - |
| Homo_sapiens_2  | 16792786 | 16794855 | HERVHF_pol  | - |
| Homo_sapiens_2  | 16794364 | 16795194 | HERVHF_pro  | - |
| Homo_sapiens_2  | 16795201 | 16795527 | HERVHF_gag  | - |
| Homo_sapiens_2  | 16797278 | 16797713 | HERVHF_3LTR | - |
| Homo_sapiens_2  | 34789818 | 34790229 | HERVHF_5LTR | + |
| Homo_sapiens_2  | 34791769 | 34792152 | HERVHF_gag  | + |
| Homo_sapiens_2  | 34792609 | 34793756 | HERVHF_pol  | + |
| Homo_sapiens_2  | 34794693 | 34795526 | HERVHF_env  | + |
| Homo_sapiens_2  | 34795641 | 34796058 | HERVHF_3LTR | + |
| Homo_sapiens_2  | 36599100 | 36599527 | HERVHF_5LTR | + |
| Homo_sapiens_2  | 36601097 | 36601510 | HERVHF_gag  | + |
| Homo_sapiens_2  | 36601597 | 36602346 | HERVHF_pro  | + |

|                |           |           |             |   |
|----------------|-----------|-----------|-------------|---|
| Homo_sapiens_2 | 36601708  | 36603923  | HERVHF_pol  | + |
| Homo_sapiens_2 | 36604333  | 36604763  | HERVHF_3LTR | + |
| Homo_sapiens_2 | 38080800  | 38081210  | HERVHF_5LTR | - |
| Homo_sapiens_2 | 38081220  | 38081575  | HERVHF_env  | - |
| Homo_sapiens_2 | 38081793  | 38083597  | HERVHF_pol  | - |
| Homo_sapiens_2 | 38083220  | 38083771  | HERVHF_pro  | - |
| Homo_sapiens_2 | 38086112  | 38086513  | HERVHF_3LTR | - |
| Homo_sapiens_2 | 58113434  | 58113791  | HERVHF_5LTR | - |
| Homo_sapiens_2 | 58113879  | 58114195  | HERVHF_env  | - |
| Homo_sapiens_2 | 58114467  | 58116483  | HERVHF_pol  | - |
| Homo_sapiens_2 | 58115845  | 58116678  | HERVHF_pro  | - |
| Homo_sapiens_2 | 58118698  | 58119055  | HERVHF_3LTR | - |
| Homo_sapiens_2 | 67331517  | 67331916  | HERVHF_5LTR | + |
| Homo_sapiens_2 | 67333734  | 67334075  | HERVHF_gag  | + |
| Homo_sapiens_2 | 67334330  | 67335070  | HERVHF_pro  | + |
| Homo_sapiens_2 | 67334504  | 67336274  | HERVHF_pol  | + |
| Homo_sapiens_2 | 67337203  | 67337603  | HERVHF_3LTR | + |
| Homo_sapiens_2 | 69789900  | 69790233  | HUERSP_5LTR | - |
| Homo_sapiens_2 | 69794775  | 69795859  | HUERSP_pol  | - |
| Homo_sapiens_2 | 69795440  | 69795853  | HUERSP_pro  | - |
| Homo_sapiens_2 | 69799273  | 69799618  | HUERSP_3LTR | - |
| Homo_sapiens_2 | 71086358  | 71086810  | HERVHF_5LTR | - |
| Homo_sapiens_2 | 71087296  | 71088009  | HERVHF_pol  | - |
| Homo_sapiens_2 | 71087467  | 71088297  | HERVHF_pro  | - |
| Homo_sapiens_2 | 71090545  | 71090998  | HERVHF_3LTR | - |
| Homo_sapiens_2 | 76573623  | 76574075  | HERVHF_5LTR | - |
| Homo_sapiens_2 | 76574528  | 76576681  | HERVHF_pol  | - |
| Homo_sapiens_2 | 76577110  | 76577433  | HERVHF_gag  | - |
| Homo_sapiens_2 | 76579252  | 76579704  | HERVHF_3LTR | - |
| Homo_sapiens_2 | 77088248  | 77088587  | HERVHF_5LTR | + |
| Homo_sapiens_2 | 77090896  | 77091681  | HERVHF_pro  | + |
| Homo_sapiens_2 | 77091043  | 77093257  | HERVHF_pol  | + |
| Homo_sapiens_2 | 77093690  | 77094041  | HERVHF_3LTR | + |
| Homo_sapiens_2 | 77965137  | 77965570  | HERVHF_5LTR | + |
| Homo_sapiens_2 | 77967584  | 77968414  | HERVHF_pro  | + |
| Homo_sapiens_2 | 77967872  | 77970012  | HERVHF_pol  | + |
| Homo_sapiens_2 | 77970418  | 77970868  | HERVHF_3LTR | + |
| Homo_sapiens_2 | 116183751 | 116184169 | HERVHF_5LTR | - |
| Homo_sapiens_2 | 116184795 | 116187097 | HERVHF_pol  | - |
| Homo_sapiens_2 | 116186690 | 116187325 | HERVHF_pro  | - |
| Homo_sapiens_2 | 116187528 | 116187854 | HERVHF_gag  | - |
| Homo_sapiens_2 | 116189298 | 116189711 | HERVHF_3LTR | - |
| Homo_sapiens_2 | 140426394 | 140426788 | HERVHF_5LTR | + |
| Homo_sapiens_2 | 140428048 | 140428524 | HERVHF_gag  | + |

|                |           |           |             |   |
|----------------|-----------|-----------|-------------|---|
| Homo_sapiens_2 | 140428698 | 140429447 | HERVHF_pro  | + |
| Homo_sapiens_2 | 140428950 | 140431540 | HERVHF_pol  | + |
| Homo_sapiens_2 | 140431994 | 140432382 | HERVHF_3LTR | + |
| Homo_sapiens_2 | 150112716 | 150113171 | HERVHF_5LTR | + |
| Homo_sapiens_2 | 150114585 | 150115055 | HERVHF_gag  | + |
| Homo_sapiens_2 | 150115415 | 150117524 | HERVHF_pol  | + |
| Homo_sapiens_2 | 150118100 | 150118566 | HERVHF_3LTR | + |
| Homo_sapiens_2 | 154867350 | 154867726 | HERVHF_5LTR | + |
| Homo_sapiens_2 | 154870083 | 154871371 | HERVHF_pol  | + |
| Homo_sapiens_2 | 154873073 | 154873885 | HERVHF_env  | + |
| Homo_sapiens_2 | 154874196 | 154874560 | HERVHF_3LTR | + |
| Homo_sapiens_2 | 156720089 | 156720504 | HERVHF_5LTR | - |
| Homo_sapiens_2 | 156720949 | 156723097 | HERVHF_pol  | - |
| Homo_sapiens_2 | 156723325 | 156723648 | HERVHF_gag  | - |
| Homo_sapiens_2 | 156725439 | 156725860 | HERVHF_3LTR | - |
| Homo_sapiens_2 | 164295810 | 164296142 | HERVHF_5LTR | + |
| Homo_sapiens_2 | 164297998 | 164298327 | HERVHF_gag  | + |
| Homo_sapiens_2 | 164298324 | 164299157 | HERVHF_pro  | + |
| Homo_sapiens_2 | 164298615 | 164300513 | HERVHF_pol  | + |
| Homo_sapiens_2 | 164301116 | 164301451 | HERVHF_3LTR | + |
| Homo_sapiens_2 | 170977457 | 170977864 | HERVHF_5LTR | - |
| Homo_sapiens_2 | 170978313 | 170980466 | HERVHF_pol  | - |
| Homo_sapiens_2 | 170980086 | 170980841 | HERVHF_pro  | - |
| Homo_sapiens_2 | 170981009 | 170981464 | HERVHF_gag  | - |
| Homo_sapiens_2 | 170982984 | 170983388 | HERVHF_3LTR | - |
| Homo_sapiens_2 | 192130350 | 192130819 | HERVHF_5LTR | + |
| Homo_sapiens_2 | 192132978 | 192133724 | HERVHF_pro  | + |
| Homo_sapiens_2 | 192133182 | 192135273 | HERVHF_pol  | + |
| Homo_sapiens_2 | 192135644 | 192136107 | HERVHF_3LTR | + |
| Homo_sapiens_2 | 192506078 | 192506492 | HERVHF_5LTR | + |
| Homo_sapiens_2 | 192507423 | 192509865 | HERVHF_gag  | + |
| Homo_sapiens_2 | 192510149 | 192510781 | HERVHF_pro  | + |
| Homo_sapiens_2 | 192510377 | 192512317 | HERVHF_pol  | + |
| Homo_sapiens_2 | 192512768 | 192513184 | HERVHF_3LTR | + |
| Homo_sapiens_2 | 192918287 | 192918656 | HERVHF_5LTR | + |
| Homo_sapiens_2 | 192920211 | 192920537 | HERVHF_gag  | + |
| Homo_sapiens_2 | 192920620 | 192921390 | HERVHF_pro  | + |
| Homo_sapiens_2 | 192920827 | 192921543 | HERVHF_pol  | + |
| Homo_sapiens_2 | 192923669 | 192924253 | HERVHF_env  | + |
| Homo_sapiens_2 | 192924402 | 192924763 | HERVHF_3LTR | + |
| Homo_sapiens_2 | 194130688 | 194131111 | HERVHF_5LTR | - |
| Homo_sapiens_2 | 194131526 | 194133889 | HERVHF_pol  | - |
| Homo_sapiens_2 | 194133188 | 194134122 | HERVHF_pro  | - |
| Homo_sapiens_2 | 194136134 | 194136553 | HERVHF_3LTR | - |

|                 |           |           |             |   |
|-----------------|-----------|-----------|-------------|---|
| Homo_sapiens_2  | 215922303 | 215922762 | HERVHF_5LTR | + |
| Homo_sapiens_2  | 215924520 | 215924849 | HERVHF_gag  | + |
| Homo_sapiens_2  | 215924901 | 215925665 | HERVHF_pro  | + |
| Homo_sapiens_2  | 215925144 | 215927087 | HERVHF_pol  | + |
| Homo_sapiens_2  | 215927674 | 215928129 | HERVHF_3LTR | + |
| Homo_sapiens_2  | 218174020 | 218174458 | HERVHF_5LTR | - |
| Homo_sapiens_2  | 218175024 | 218176780 | HERVHF_pol  | - |
| Homo_sapiens_2  | 218176500 | 218177294 | HERVHF_pro  | - |
| Homo_sapiens_2  | 218177318 | 218177701 | HERVHF_gag  | - |
| Homo_sapiens_2  | 218179456 | 218179903 | HERVHF_3LTR | - |
| Homo_sapiens_2  | 224225331 | 224225730 | HERVHF_5LTR | + |
| Homo_sapiens_2  | 224228022 | 224228600 | HERVHF_pro  | + |
| Homo_sapiens_2  | 224228193 | 224229742 | HERVHF_pol  | + |
| Homo_sapiens_2  | 224230587 | 224230988 | HERVHF_3LTR | + |
| Homo_sapiens_2  | 224296632 | 224297045 | HERVHF_5LTR | + |
| Homo_sapiens_2  | 224299201 | 224299959 | HERVHF_pro  | + |
| Homo_sapiens_2  | 224299579 | 224301326 | HERVHF_pol  | + |
| Homo_sapiens_2  | 224301940 | 224302365 | HERVHF_3LTR | + |
| Homo_sapiens_2  | 237606784 | 237607197 | HERVHF_5LTR | + |
| Homo_sapiens_2  | 237609020 | 237609400 | HERVHF_gag  | + |
| Homo_sapiens_2  | 237609517 | 237610233 | HERVHF_pro  | + |
| Homo_sapiens_2  | 237609622 | 237611630 | HERVHF_pol  | + |
| Homo_sapiens_2  | 237612243 | 237612656 | HERVHF_3LTR | + |
| Homo_sapiens_20 | 12340267  | 12340705  | HERVHF_5LTR | - |
| Homo_sapiens_20 | 12341115  | 12343098  | HERVHF_pol  | - |
| Homo_sapiens_20 | 12343106  | 12343498  | HERVHF_pro  | - |
| Homo_sapiens_20 | 12343532  | 12343852  | HERVHF_gag  | - |
| Homo_sapiens_20 | 12345506  | 12345940  | HERVHF_3LTR | - |
| Homo_sapiens_20 | 12753802  | 12754276  | HERVHF_5LTR | + |
| Homo_sapiens_20 | 12756027  | 12756350  | HERVHF_gag  | + |
| Homo_sapiens_20 | 12756779  | 12758770  | HERVHF_pol  | + |
| Homo_sapiens_20 | 12759162  | 12759632  | HERVHF_3LTR | + |
| Homo_sapiens_20 | 19752046  | 19752476  | HERVHF_5LTR | - |
| Homo_sapiens_20 | 19752891  | 19753827  | HERVHF_pol  | - |
| Homo_sapiens_20 | 19753824  | 19754375  | HERVHF_pro  | - |
| Homo_sapiens_20 | 19754465  | 19754815  | HERVHF_gag  | - |
| Homo_sapiens_20 | 19756340  | 19756776  | HERVHF_3LTR | - |
| Homo_sapiens_20 | 40269047  | 40269508  | HERVHF_5LTR | + |
| Homo_sapiens_20 | 40271560  | 40272339  | HERVHF_pro  | + |
| Homo_sapiens_20 | 40271758  | 40273720  | HERVHF_pol  | + |
| Homo_sapiens_20 | 40274312  | 40274769  | HERVHF_3LTR | + |
| Homo_sapiens_21 | 16914128  | 16914536  | HERVHF_5LTR | + |
| Homo_sapiens_21 | 16916125  | 16916436  | HERVHF_gag  | + |
| Homo_sapiens_21 | 16916717  | 16917301  | HERVHF_pro  | + |

|                 |          |          |             |   |
|-----------------|----------|----------|-------------|---|
| Homo_sapiens_21 | 16916894 | 16918726 | HERVHF_pol  | + |
| Homo_sapiens_21 | 16919493 | 16919901 | HERVHF_3LTR | + |
| Homo_sapiens_21 | 17121415 | 17121851 | HERVHF_5LTR | + |
| Homo_sapiens_21 | 17123651 | 17123971 | HERVHF_gag  | + |
| Homo_sapiens_21 | 17124024 | 17124968 | HERVHF_pro  | + |
| Homo_sapiens_21 | 17124222 | 17126293 | HERVHF_pol  | + |
| Homo_sapiens_21 | 17127325 | 17127764 | HERVHF_3LTR | + |
| Homo_sapiens_21 | 26227947 | 26228284 | HERVHF_5LTR | - |
| Homo_sapiens_21 | 26228683 | 26231015 | HERVHF_pol  | - |
| Homo_sapiens_21 | 26230473 | 26231054 | HERVHF_pro  | - |
| Homo_sapiens_21 | 26231389 | 26231739 | HERVHF_gag  | - |
| Homo_sapiens_21 | 26233157 | 26233485 | HERVHF_3LTR | - |
| Homo_sapiens_21 | 42800845 | 42801294 | HERVHF_5LTR | - |
| Homo_sapiens_21 | 42801909 | 42803999 | HERVHF_pol  | - |
| Homo_sapiens_21 | 42806130 | 42806578 | HERVHF_3LTR | - |
| Homo_sapiens_3  | 890691   | 891105   | HERVHF_5LTR | - |
| Homo_sapiens_3  | 891555   | 893583   | HERVHF_pol  | - |
| Homo_sapiens_3  | 893071   | 893922   | HERVHF_pro  | - |
| Homo_sapiens_3  | 895996   | 896413   | HERVHF_3LTR | - |
| Homo_sapiens_3  | 8177035  | 8177443  | HERVHF_5LTR | + |
| Homo_sapiens_3  | 8179571  | 8180296  | HERVHF_pro  | + |
| Homo_sapiens_3  | 8179778  | 8181790  | HERVHF_pol  | + |
| Homo_sapiens_3  | 8182306  | 8182722  | HERVHF_3LTR | + |
| Homo_sapiens_3  | 21189031 | 21189353 | HERVHF_5LTR | - |
| Homo_sapiens_3  | 21189872 | 21191978 | HERVHF_pol  | - |
| Homo_sapiens_3  | 21192518 | 21192895 | HERVHF_gag  | - |
| Homo_sapiens_3  | 21193803 | 21194139 | HERVHF_3LTR | - |
| Homo_sapiens_3  | 35874404 | 35874736 | HERVHF_5LTR | - |
| Homo_sapiens_3  | 35875354 | 35877250 | HERVHF_pol  | - |
| Homo_sapiens_3  | 35876771 | 35877529 | HERVHF_pro  | - |
| Homo_sapiens_3  | 35877674 | 35878018 | HERVHF_gag  | - |
| Homo_sapiens_3  | 35879665 | 35879998 | HERVHF_3LTR | - |
| Homo_sapiens_3  | 38075877 | 38076624 | HERVHF_5LTR | - |
| Homo_sapiens_3  | 38077539 | 38079107 | HERVHF_pol  | - |
| Homo_sapiens_3  | 38078700 | 38079281 | HERVHF_pro  | - |
| Homo_sapiens_3  | 38079536 | 38079865 | HERVHF_gag  | - |
| Homo_sapiens_3  | 38082755 | 38083512 | HERVHF_3LTR | - |
| Homo_sapiens_3  | 54634482 | 54634938 | HERVHF_5LTR | - |
| Homo_sapiens_3  | 54635330 | 54637456 | HERVHF_pol  | - |
| Homo_sapiens_3  | 54636914 | 54637756 | HERVHF_pro  | - |
| Homo_sapiens_3  | 54637769 | 54638068 | HERVHF_gag  | - |
| Homo_sapiens_3  | 54639751 | 54640205 | HERVHF_3LTR | - |
| Homo_sapiens_3  | 72023124 | 72023534 | HERVHF_5LTR | + |
| Homo_sapiens_3  | 72025143 | 72025466 | HERVHF_gag  | + |

|                |           |           |               |   |
|----------------|-----------|-----------|---------------|---|
| Homo_sapiens_3 | 72025538  | 72026323  | HERVHF_pro    | + |
| Homo_sapiens_3 | 72025664  | 72028047  | HERVHF_pol    | + |
| Homo_sapiens_3 | 72028493  | 72028898  | HERVHF_3LTR   | + |
| Homo_sapiens_3 | 104439927 | 104440361 | HERVHF_5LTR   | - |
| Homo_sapiens_3 | 104440832 | 104442835 | HERVHF_pol    | - |
| Homo_sapiens_3 | 104442338 | 104443171 | HERVHF_pro    | - |
| Homo_sapiens_3 | 104443175 | 104443588 | HERVHF_gag    | - |
| Homo_sapiens_3 | 104445340 | 104445775 | HERVHF_3LTR   | - |
| Homo_sapiens_3 | 105601130 | 105601544 | HSERVIII_5LTR | - |
| Homo_sapiens_3 | 105602260 | 105604076 | HSERVIII_pol  | - |
| Homo_sapiens_3 | 105607168 | 105607579 | HSERVIII_3LTR | - |
| Homo_sapiens_3 | 112418410 | 112418865 | HERVHF_5LTR   | - |
| Homo_sapiens_3 | 112419048 | 112420617 | HERVHF_pol    | - |
| Homo_sapiens_3 | 112420824 | 112421368 | HERVHF_gag    | - |
| Homo_sapiens_3 | 112422911 | 112423366 | HERVHF_3LTR   | - |
| Homo_sapiens_3 | 115793481 | 115793932 | HERVHF_5LTR   | - |
| Homo_sapiens_3 | 115794526 | 115796364 | HERVHF_pol    | - |
| Homo_sapiens_3 | 115796762 | 115797091 | HERVHF_gag    | - |
| Homo_sapiens_3 | 115798715 | 115799166 | HERVHF_3LTR   | - |
| Homo_sapiens_3 | 128959817 | 128960144 | HERVHF_5LTR   | + |
| Homo_sapiens_3 | 128962177 | 128963010 | HERVHF_pro    | + |
| Homo_sapiens_3 | 128962468 | 128964143 | HERVHF_pol    | + |
| Homo_sapiens_3 | 128964958 | 128965264 | HERVHF_3LTR   | + |
| Homo_sapiens_3 | 130059222 | 130059571 | HERVHF_5LTR   | + |
| Homo_sapiens_3 | 130062082 | 130064170 | HERVHF_pol    | + |
| Homo_sapiens_3 | 130064629 | 130064980 | HERVHF_3LTR   | + |
| Homo_sapiens_3 | 137595594 | 137596055 | HERVHF_5LTR   | + |
| Homo_sapiens_3 | 137597610 | 137597921 | HERVHF_gag    | + |
| Homo_sapiens_3 | 137598245 | 137600583 | HERVHF_pol    | + |
| Homo_sapiens_3 | 137600742 | 137601199 | HERVHF_3LTR   | + |
| Homo_sapiens_3 | 148414244 | 148414700 | HERVHF_5LTR   | + |
| Homo_sapiens_3 | 148416409 | 148416780 | HERVHF_gag    | + |
| Homo_sapiens_3 | 148416909 | 148417658 | HERVHF_pro    | + |
| Homo_sapiens_3 | 148417290 | 148419056 | HERVHF_pol    | + |
| Homo_sapiens_3 | 148419646 | 148420099 | HERVHF_3LTR   | + |
| Homo_sapiens_3 | 153226145 | 153226572 | HERVHF_5LTR   | - |
| Homo_sapiens_3 | 153228373 | 153229655 | HERVHF_pol    | - |
| Homo_sapiens_3 | 153229116 | 153229943 | HERVHF_pro    | - |
| Homo_sapiens_3 | 153229950 | 153230288 | HERVHF_gag    | - |
| Homo_sapiens_3 | 153232110 | 153232531 | HERVHF_3LTR   | - |
| Homo_sapiens_3 | 155274423 | 155274841 | HERVHF_5LTR   | - |
| Homo_sapiens_3 | 155275702 | 155278149 | HERVHF_pol    | - |
| Homo_sapiens_3 | 155277628 | 155278386 | HERVHF_pro    | - |
| Homo_sapiens_3 | 155278439 | 155278762 | HERVHF_gag    | - |



|                |           |           |             |   |
|----------------|-----------|-----------|-------------|---|
| Homo_sapiens_3 | 155280382 | 155280792 | HERVHF_3LTR | - |
| Homo_sapiens_3 | 161721912 | 161722322 | HERVHF_5LTR | - |
| Homo_sapiens_3 | 161722774 | 161724851 | HERVHF_pol  | - |
| Homo_sapiens_3 | 161724288 | 161725067 | HERVHF_pro  | - |
| Homo_sapiens_3 | 161725118 | 161725534 | HERVHF_gag  | - |
| Homo_sapiens_3 | 161727366 | 161727777 | HERVHF_3LTR | - |
| Homo_sapiens_3 | 166500682 | 166501004 | HERVHF_5LTR | - |
| Homo_sapiens_3 | 166501414 | 166503748 | HERVHF_pol  | - |
| Homo_sapiens_3 | 166503206 | 166503985 | HERVHF_pro  | - |
| Homo_sapiens_3 | 166506099 | 166506419 | HERVHF_3LTR | - |
| Homo_sapiens_3 | 170681756 | 170682257 | HERVHF_5LTR | - |
| Homo_sapiens_3 | 170682420 | 170683196 | HERVHF_env  | - |
| Homo_sapiens_3 | 170684340 | 170686398 | HERVHF_pol  | - |
| Homo_sapiens_3 | 170685754 | 170686533 | HERVHF_pro  | - |
| Homo_sapiens_3 | 170688805 | 170689306 | HERVHF_3LTR | - |
| Homo_sapiens_3 | 178207407 | 178207830 | HERVHF_5LTR | + |
| Homo_sapiens_3 | 178209668 | 178209979 | HERVHF_gag  | + |
| Homo_sapiens_3 | 178210068 | 178210847 | HERVHF_pro  | + |
| Homo_sapiens_3 | 178210203 | 178212316 | HERVHF_pol  | + |
| Homo_sapiens_3 | 178213056 | 178214020 | HERVHF_env  | + |
| Homo_sapiens_3 | 178214244 | 178214674 | HERVHF_3LTR | + |
| Homo_sapiens_3 | 186657773 | 186658172 | HERVHF_5LTR | + |
| Homo_sapiens_3 | 186659818 | 186660423 | HERVHF_gag  | + |
| Homo_sapiens_3 | 186660747 | 186661298 | HERVHF_pro  | + |
| Homo_sapiens_3 | 186660786 | 186662849 | HERVHF_pol  | + |
| Homo_sapiens_3 | 186663286 | 186663692 | HERVHF_3LTR | + |
| Homo_sapiens_3 | 190920164 | 190920619 | HERVHF_5LTR | + |
| Homo_sapiens_3 | 190923015 | 190924819 | HERVHF_pol  | + |
| Homo_sapiens_3 | 190925408 | 190925863 | HERVHF_3LTR | + |
| Homo_sapiens_3 | 191666258 | 191666713 | HERVHF_5LTR | - |
| Homo_sapiens_3 | 191667212 | 191669450 | HERVHF_pol  | - |
| Homo_sapiens_3 | 191668908 | 191669738 | HERVHF_pro  | - |
| Homo_sapiens_3 | 191669745 | 191670077 | HERVHF_gag  | - |
| Homo_sapiens_3 | 191671926 | 191672379 | HERVHF_3LTR | - |
| Homo_sapiens_3 | 191895458 | 191895798 | HERVHF_5LTR | - |
| Homo_sapiens_3 | 191896350 | 191898124 | HERVHF_pol  | - |
| Homo_sapiens_3 | 191900805 | 191901132 | HERVHF_3LTR | - |
| Homo_sapiens_3 | 192071107 | 192071527 | HERVHF_5LTR | - |
| Homo_sapiens_3 | 192072114 | 192074052 | HERVHF_pol  | - |
| Homo_sapiens_3 | 192073516 | 192074289 | HERVHF_pro  | - |
| Homo_sapiens_3 | 192074342 | 192074671 | HERVHF_gag  | - |
| Homo_sapiens_3 | 192076443 | 192076859 | HERVHF_3LTR | - |
| Homo_sapiens_4 | 3927445   | 3927854   | HERVHF_5LTR | + |
| Homo_sapiens_4 | 3929526   | 3929825   | HERVHF_gag  | + |

|                |          |          |             |   |
|----------------|----------|----------|-------------|---|
| Homo_sapiens_4 | 3929852  | 3930682  | HERVHF_pro  | + |
| Homo_sapiens_4 | 3930140  | 3932053  | HERVHF_pol  | + |
| Homo_sapiens_4 | 3932671  | 3933082  | HERVHF_3LTR | + |
| Homo_sapiens_4 | 14169946 | 14170399 | HERVHF_5LTR | - |
| Homo_sapiens_4 | 14171508 | 14173531 | HERVHF_pol  | - |
| Homo_sapiens_4 | 14172947 | 14173783 | HERVHF_pro  | - |
| Homo_sapiens_4 | 14173823 | 14174227 | HERVHF_gag  | - |
| Homo_sapiens_4 | 14175524 | 14175976 | HERVHF_3LTR | - |
| Homo_sapiens_4 | 16997808 | 16998200 | HERVHF_5LTR | + |
| Homo_sapiens_4 | 17000545 | 17002680 | HERVHF_pol  | + |
| Homo_sapiens_4 | 17003527 | 17003928 | HERVHF_3LTR | + |
| Homo_sapiens_4 | 24500975 | 24501427 | HERVHF_5LTR | + |
| Homo_sapiens_4 | 24503155 | 24503454 | HERVHF_gag  | + |
| Homo_sapiens_4 | 24503488 | 24504321 | HERVHF_pro  | + |
| Homo_sapiens_4 | 24503779 | 24505852 | HERVHF_pol  | + |
| Homo_sapiens_4 | 24506300 | 24506752 | HERVHF_3LTR | + |
| Homo_sapiens_4 | 27974874 | 27975246 | HERVHF_5LTR | + |
| Homo_sapiens_4 | 27975998 | 27976339 | HERVHF_gag  | + |
| Homo_sapiens_4 | 27976612 | 27977274 | HERVHF_pro  | + |
| Homo_sapiens_4 | 27976735 | 27980331 | HERVHF_pol  | + |
| Homo_sapiens_4 | 27980964 | 27981319 | HERVHF_3LTR | + |
| Homo_sapiens_4 | 61764274 | 61764699 | HERVHF_5LTR | - |
| Homo_sapiens_4 | 61765149 | 61767131 | HERVHF_pol  | - |
| Homo_sapiens_4 | 61766724 | 61767359 | HERVHF_pro  | - |
| Homo_sapiens_4 | 61767632 | 61768099 | HERVHF_gag  | - |
| Homo_sapiens_4 | 61769601 | 61770008 | HERVHF_3LTR | - |
| Homo_sapiens_4 | 78713840 | 78714293 | HERVHF_5LTR | - |
| Homo_sapiens_4 | 78714700 | 78716826 | HERVHF_pol  | - |
| Homo_sapiens_4 | 78716284 | 78716919 | HERVHF_pro  | - |
| Homo_sapiens_4 | 78717122 | 78717439 | HERVHF_gag  | - |
| Homo_sapiens_4 | 78719270 | 78719721 | HERVHF_3LTR | - |
| Homo_sapiens_4 | 79554023 | 79554421 | HERVHF_5LTR | - |
| Homo_sapiens_4 | 79555128 | 79556943 | HERVHF_pol  | - |
| Homo_sapiens_4 | 79556428 | 79557150 | HERVHF_pro  | - |
| Homo_sapiens_4 | 79557241 | 79557651 | HERVHF_gag  | - |
| Homo_sapiens_4 | 79559319 | 79559718 | HERVHF_3LTR | - |
| Homo_sapiens_4 | 91623641 | 91624091 | HERVHF_5LTR | + |
| Homo_sapiens_4 | 91626641 | 91627363 | HERVHF_pro  | + |
| Homo_sapiens_4 | 91626752 | 91628928 | HERVHF_pol  | + |
| Homo_sapiens_4 | 91629248 | 91629703 | HERVHF_3LTR | + |
| Homo_sapiens_4 | 92271492 | 92271860 | HERVHF_5LTR | - |
| Homo_sapiens_4 | 92272378 | 92274561 | HERVHF_pol  | - |
| Homo_sapiens_4 | 92273926 | 92274771 | HERVHF_pro  | - |
| Homo_sapiens_4 | 92274781 | 92275299 | HERVHF_gag  | - |

|                |           |           |             |   |
|----------------|-----------|-----------|-------------|---|
| Homo_sapiens_4 | 92277196  | 92277564  | HERVHF_3LTR | - |
| Homo_sapiens_4 | 94382917  | 94383320  | HERVHF_5LTR | - |
| Homo_sapiens_4 | 94384188  | 94386301  | HERVHF_pol  | - |
| Homo_sapiens_4 | 94386732  | 94387058  | HERVHF_gag  | - |
| Homo_sapiens_4 | 94388862  | 94389273  | HERVHF_3LTR | - |
| Homo_sapiens_4 | 103553770 | 103554203 | HERVHF_5LTR | - |
| Homo_sapiens_4 | 103554640 | 103556729 | HERVHF_pol  | - |
| Homo_sapiens_4 | 103556187 | 103557020 | HERVHF_pro  | - |
| Homo_sapiens_4 | 103557024 | 103557353 | HERVHF_gag  | - |
| Homo_sapiens_4 | 103559041 | 103559475 | HERVHF_3LTR | - |
| Homo_sapiens_4 | 119993716 | 119994118 | HERVHF_5LTR | + |
| Homo_sapiens_4 | 119995847 | 119996302 | HERVHF_gag  | + |
| Homo_sapiens_4 | 119996399 | 119997211 | HERVHF_pro  | + |
| Homo_sapiens_4 | 119996690 | 119997978 | HERVHF_pol  | + |
| Homo_sapiens_4 | 119999268 | 119999651 | HERVHF_3LTR | + |
| Homo_sapiens_4 | 125561618 | 125562071 | HERVHF_5LTR | - |
| Homo_sapiens_4 | 125562473 | 125564689 | HERVHF_pol  | - |
| Homo_sapiens_4 | 125564897 | 125565226 | HERVHF_gag  | - |
| Homo_sapiens_4 | 125567006 | 125567457 | HERVHF_3LTR | - |
| Homo_sapiens_4 | 128640901 | 128641313 | HERVHF_5LTR | - |
| Homo_sapiens_4 | 128641891 | 128643929 | HERVHF_pol  | - |
| Homo_sapiens_4 | 128643291 | 128643971 | HERVHF_pro  | - |
| Homo_sapiens_4 | 128644112 | 128644450 | HERVHF_gag  | - |
| Homo_sapiens_4 | 128646206 | 128646616 | HERVHF_3LTR | - |
| Homo_sapiens_4 | 130767409 | 130767812 | HERVHF_5LTR | + |
| Homo_sapiens_4 | 130769391 | 130769807 | HERVHF_gag  | + |
| Homo_sapiens_4 | 130770133 | 130772462 | HERVHF_pol  | + |
| Homo_sapiens_4 | 130772870 | 130773270 | HERVHF_3LTR | + |
| Homo_sapiens_4 | 133263584 | 133263969 | HERVHF_5LTR | - |
| Homo_sapiens_4 | 133265166 | 133266533 | HERVHF_pol  | - |
| Homo_sapiens_4 | 133266407 | 133266946 | HERVHF_pro  | - |
| Homo_sapiens_4 | 133266953 | 133267396 | HERVHF_gag  | - |
| Homo_sapiens_4 | 133268524 | 133268917 | HERVHF_3LTR | - |
| Homo_sapiens_4 | 134012205 | 134012609 | HERVHF_5LTR | + |
| Homo_sapiens_4 | 134014655 | 134015497 | HERVHF_pro  | + |
| Homo_sapiens_4 | 134014943 | 134017565 | HERVHF_pol  | + |
| Homo_sapiens_4 | 134017974 | 134018374 | HERVHF_3LTR | + |
| Homo_sapiens_4 | 135167433 | 135167868 | HERVHF_5LTR | - |
| Homo_sapiens_4 | 135168278 | 135170266 | HERVHF_pol  | - |
| Homo_sapiens_4 | 135169703 | 135170473 | HERVHF_pro  | - |
| Homo_sapiens_4 | 135172687 | 135173119 | HERVHF_3LTR | - |
| Homo_sapiens_4 | 138927837 | 138928239 | HERVHF_5LTR | + |
| Homo_sapiens_4 | 138930431 | 138931174 | HERVHF_pro  | + |
| Homo_sapiens_4 | 138930632 | 138932695 | HERVHF_pol  | + |

|                |           |           |             |   |
|----------------|-----------|-----------|-------------|---|
| Homo_sapiens_4 | 138933142 | 138933547 | HERVHF_3LTR | + |
| Homo_sapiens_4 | 145698823 | 145699274 | HERVHF_5LTR | + |
| Homo_sapiens_4 | 145701596 | 145702378 | HERVHF_pro  | + |
| Homo_sapiens_4 | 145701734 | 145702528 | HERVHF_pol  | + |
| Homo_sapiens_4 | 145703056 | 145703505 | HERVHF_3LTR | + |
| Homo_sapiens_4 | 152741345 | 152741806 | HERVHF_5LTR | - |
| Homo_sapiens_4 | 152742614 | 152744164 | HERVHF_pol  | - |
| Homo_sapiens_4 | 152743760 | 152744263 | HERVHF_pro  | - |
| Homo_sapiens_4 | 152746701 | 152747172 | HERVHF_3LTR | - |
| Homo_sapiens_4 | 156600197 | 156600651 | HERVHF_5LTR | + |
| Homo_sapiens_4 | 156602433 | 156602756 | HERVHF_gag  | + |
| Homo_sapiens_4 | 156603049 | 156605073 | HERVHF_pol  | + |
| Homo_sapiens_4 | 156605584 | 156606038 | HERVHF_3LTR | + |
| Homo_sapiens_4 | 166716125 | 166716585 | HERVHF_5LTR | + |
| Homo_sapiens_4 | 166718361 | 166718774 | HERVHF_gag  | + |
| Homo_sapiens_4 | 166718781 | 166719614 | HERVHF_pro  | + |
| Homo_sapiens_4 | 166719069 | 166721085 | HERVHF_pol  | + |
| Homo_sapiens_4 | 166721604 | 166722057 | HERVHF_3LTR | + |
| Homo_sapiens_4 | 167922959 | 167923319 | HERVHF_5LTR | + |
| Homo_sapiens_4 | 167925658 | 167927423 | HERVHF_pol  | + |
| Homo_sapiens_4 | 167928277 | 167928630 | HERVHF_3LTR | + |
| Homo_sapiens_4 | 170116433 | 170116847 | HERVHF_5LTR | + |
| Homo_sapiens_4 | 170119176 | 170119760 | HERVHF_pro  | + |
| Homo_sapiens_4 | 170119353 | 170121157 | HERVHF_pol  | + |
| Homo_sapiens_4 | 170121747 | 170122164 | HERVHF_3LTR | + |
| Homo_sapiens_4 | 175461163 | 175461498 | HERVHF_5LTR | - |
| Homo_sapiens_4 | 175462086 | 175464209 | HERVHF_pol  | - |
| Homo_sapiens_4 | 175464527 | 175464889 | HERVHF_pro  | - |
| Homo_sapiens_4 | 175466677 | 175467003 | HERVHF_3LTR | - |
| Homo_sapiens_4 | 178207119 | 178207533 | HERVHF_5LTR | + |
| Homo_sapiens_4 | 178209276 | 178209596 | HERVHF_gag  | + |
| Homo_sapiens_4 | 178209862 | 178212501 | HERVHF_pol  | + |
| Homo_sapiens_4 | 178212550 | 178212918 | HERVHF_env  | + |
| Homo_sapiens_4 | 178212931 | 178213344 | HERVHF_3LTR | + |
| Homo_sapiens_5 | 76357256  | 76357707  | HERVHF_5LTR | + |
| Homo_sapiens_5 | 76359499  | 76359828  | HERVHF_gag  | + |
| Homo_sapiens_5 | 76359835  | 76360665  | HERVHF_pro  | + |
| Homo_sapiens_5 | 76360297  | 76361794  | HERVHF_pol  | + |
| Homo_sapiens_5 | 76362626  | 76363073  | HERVHF_3LTR | + |
| Homo_sapiens_5 | 92823742  | 92824175  | HERVHF_5LTR | + |
| Homo_sapiens_5 | 92826033  | 92826407  | HERVHF_gag  | + |
| Homo_sapiens_5 | 92826862  | 92828213  | HERVHF_pol  | + |
| Homo_sapiens_5 | 92829273  | 92829706  | HERVHF_3LTR | + |
| Homo_sapiens_5 | 99010833  | 99011226  | HERVHF_5LTR | - |

|                |           |           |             |   |
|----------------|-----------|-----------|-------------|---|
| Homo_sapiens_5 | 99011420  | 99011785  | HERVHF_env  | - |
| Homo_sapiens_5 | 99011881  | 99014153  | HERVHF_pol  | - |
| Homo_sapiens_5 | 99013746  | 99014375  | HERVHF_pro  | - |
| Homo_sapiens_5 | 99014627  | 99015070  | HERVHF_gag  | - |
| Homo_sapiens_5 | 99016533  | 99016911  | HERVHF_3LTR | - |
| Homo_sapiens_5 | 100984293 | 100984733 | HERVHF_5LTR | - |
| Homo_sapiens_5 | 100985518 | 100987320 | HERVHF_pol  | - |
| Homo_sapiens_5 | 100986703 | 100987425 | HERVHF_pro  | - |
| Homo_sapiens_5 | 100989791 | 100990240 | HERVHF_3LTR | - |
| Homo_sapiens_5 | 104031710 | 104032120 | HERVHF_5LTR | + |
| Homo_sapiens_5 | 104033762 | 104034061 | HERVHF_gag  | + |
| Homo_sapiens_5 | 104034512 | 104036512 | HERVHF_pol  | + |
| Homo_sapiens_5 | 104036554 | 104036891 | HERVHF_env  | + |
| Homo_sapiens_5 | 104036905 | 104037315 | HERVHF_3LTR | + |
| Homo_sapiens_5 | 104063637 | 104064105 | HERVHF_5LTR | - |
| Homo_sapiens_5 | 104064759 | 104067168 | HERVHF_pol  | - |
| Homo_sapiens_5 | 104066572 | 104067411 | HERVHF_pro  | - |
| Homo_sapiens_5 | 104070029 | 104070507 | HERVHF_3LTR | - |
| Homo_sapiens_5 | 113711920 | 113712431 | HERVK_5LTR  | + |
| Homo_sapiens_5 | 113713169 | 113714110 | HERVK_pro   | + |
| Homo_sapiens_5 | 113714005 | 113714688 | HERVK_pol   | + |
| Homo_sapiens_5 | 113715448 | 113716020 | HERVK_env   | + |
| Homo_sapiens_5 | 113716118 | 113716618 | HERVK_3LTR  | + |
| Homo_sapiens_5 | 136301377 | 136301842 | HERVHF_5LTR | + |
| Homo_sapiens_5 | 136303446 | 136303754 | HERVHF_gag  | + |
| Homo_sapiens_5 | 136303790 | 136304620 | HERVHF_pro  | + |
| Homo_sapiens_5 | 136304078 | 136305769 | HERVHF_pol  | + |
| Homo_sapiens_5 | 136306563 | 136307028 | HERVHF_3LTR | + |
| Homo_sapiens_5 | 136565340 | 136565792 | HERVHF_5LTR | - |
| Homo_sapiens_5 | 136566178 | 136568317 | HERVHF_pol  | - |
| Homo_sapiens_5 | 136567754 | 136568518 | HERVHF_pro  | - |
| Homo_sapiens_5 | 136568608 | 136568928 | HERVHF_gag  | - |
| Homo_sapiens_5 | 136570795 | 136571248 | HERVHF_3LTR | - |
| Homo_sapiens_5 | 161245405 | 161245783 | HERVHF_5LTR | + |
| Homo_sapiens_5 | 161250625 | 161250936 | HERVHF_gag  | + |
| Homo_sapiens_5 | 161251362 | 161253786 | HERVHF_pol  | + |
| Homo_sapiens_5 | 161254200 | 161254586 | HERVHF_3LTR | + |
| Homo_sapiens_6 | 6027805   | 6028220   | HERVHF_5LTR | - |
| Homo_sapiens_6 | 6028648   | 6030758   | HERVHF_pol  | - |
| Homo_sapiens_6 | 6030216   | 6031049   | HERVHF_pro  | - |
| Homo_sapiens_6 | 6031136   | 6031459   | HERVHF_gag  | - |
| Homo_sapiens_6 | 6033181   | 6033592   | HERVHF_3LTR | - |
| Homo_sapiens_6 | 16259010  | 16259427  | HERVHF_5LTR | - |
| Homo_sapiens_6 | 16260019  | 16261731  | HERVHF_pol  | - |

|                |           |           |             |   |
|----------------|-----------|-----------|-------------|---|
| Homo_sapiens_6 | 16261417  | 16262241  | HERVHF_pro  | - |
| Homo_sapiens_6 | 16264480  | 16264893  | HERVHF_3LTR | - |
| Homo_sapiens_6 | 18754142  | 18754535  | HERVHF_5LTR | - |
| Homo_sapiens_6 | 18754988  | 18756902  | HERVHF_pol  | - |
| Homo_sapiens_6 | 18759478  | 18759871  | HERVHF_3LTR | - |
| Homo_sapiens_6 | 51938231  | 51938689  | HERVHF_5LTR | + |
| Homo_sapiens_6 | 51940647  | 51941819  | HERVHF_pro  | + |
| Homo_sapiens_6 | 51941547  | 51943125  | HERVHF_pol  | + |
| Homo_sapiens_6 | 51943978  | 51944430  | HERVHF_3LTR | + |
| Homo_sapiens_6 | 77658019  | 77658462  | HERVHF_5LTR | - |
| Homo_sapiens_6 | 77658624  | 77659796  | HERVHF_env  | - |
| Homo_sapiens_6 | 77660674  | 77663521  | HERVHF_pol  | - |
| Homo_sapiens_6 | 77662979  | 77663782  | HERVHF_pro  | - |
| Homo_sapiens_6 | 77665998  | 77666441  | HERVHF_3LTR | - |
| Homo_sapiens_6 | 80509795  | 80510208  | HERVHF_5LTR | - |
| Homo_sapiens_6 | 80510376  | 80513272  | HERVHF_pol  | - |
| Homo_sapiens_6 | 80512745  | 80513302  | HERVHF_pro  | - |
| Homo_sapiens_6 | 80513596  | 80513907  | HERVHF_gag  | - |
| Homo_sapiens_6 | 80515391  | 80515805  | HERVHF_3LTR | - |
| Homo_sapiens_6 | 81337017  | 81337345  | HERVHF_5LTR | - |
| Homo_sapiens_6 | 81346215  | 81348209  | HERVHF_pol  | - |
| Homo_sapiens_6 | 81347574  | 81348401  | HERVHF_pro  | - |
| Homo_sapiens_6 | 81348431  | 81348814  | HERVHF_gag  | - |
| Homo_sapiens_6 | 81351161  | 81351494  | HERVHF_3LTR | - |
| Homo_sapiens_6 | 90670268  | 90670654  | HERVHF_5LTR | - |
| Homo_sapiens_6 | 90671341  | 90673178  | HERVHF_pol  | - |
| Homo_sapiens_6 | 90672639  | 90673466  | HERVHF_pro  | - |
| Homo_sapiens_6 | 90673473  | 90673802  | HERVHF_gag  | - |
| Homo_sapiens_6 | 90675059  | 90675449  | HERVHF_3LTR | - |
| Homo_sapiens_6 | 93830155  | 93830563  | HERVHF_5LTR | - |
| Homo_sapiens_6 | 93831028  | 93833044  | HERVHF_pol  | - |
| Homo_sapiens_6 | 93832505  | 93833332  | HERVHF_pro  | - |
| Homo_sapiens_6 | 93833339  | 93833659  | HERVHF_gag  | - |
| Homo_sapiens_6 | 93835343  | 93835759  | HERVHF_3LTR | - |
| Homo_sapiens_6 | 94553917  | 94554368  | HERVHF_5LTR | - |
| Homo_sapiens_6 | 94554823  | 94556910  | HERVHF_pol  | - |
| Homo_sapiens_6 | 94556395  | 94557201  | HERVHF_pro  | - |
| Homo_sapiens_6 | 94559159  | 94559610  | HERVHF_3LTR | - |
| Homo_sapiens_6 | 97779489  | 97779949  | HERVHF_5LTR | + |
| Homo_sapiens_6 | 97782076  | 97782870  | HERVHF_pro  | + |
| Homo_sapiens_6 | 97782271  | 97784463  | HERVHF_pol  | + |
| Homo_sapiens_6 | 97784874  | 97785327  | HERVHF_3LTR | + |
| Homo_sapiens_6 | 109855762 | 109856184 | HERVHF_5LTR | - |
| Homo_sapiens_6 | 109856778 | 109858731 | HERVHF_pol  | - |

|                |           |           |             |   |
|----------------|-----------|-----------|-------------|---|
| Homo_sapiens_6 | 109858192 | 109859019 | HERVHF_pro  | - |
| Homo_sapiens_6 | 109859109 | 109859429 | HERVHF_gag  | - |
| Homo_sapiens_6 | 109861156 | 109861571 | HERVHF_3LTR | - |
| Homo_sapiens_6 | 115031787 | 115032245 | HERVHF_5LTR | + |
| Homo_sapiens_6 | 115033944 | 115034261 | HERVHF_gag  | + |
| Homo_sapiens_6 | 115034360 | 115035187 | HERVHF_pro  | + |
| Homo_sapiens_6 | 115034648 | 115036338 | HERVHF_pol  | + |
| Homo_sapiens_6 | 115037164 | 115037622 | HERVHF_3LTR | + |
| Homo_sapiens_6 | 121620508 | 121620869 | HERVHF_5LTR | - |
| Homo_sapiens_6 | 121621463 | 121623501 | HERVHF_pol  | - |
| Homo_sapiens_6 | 121622890 | 121623696 | HERVHF_pro  | - |
| Homo_sapiens_6 | 121623700 | 121624113 | HERVHF_gag  | - |
| Homo_sapiens_6 | 121625942 | 121626294 | HERVHF_3LTR | - |
| Homo_sapiens_6 | 123582333 | 123582734 | HERVHF_5LTR | - |
| Homo_sapiens_6 | 123584586 | 123585260 | HERVHF_pol  | - |
| Homo_sapiens_6 | 123584721 | 123585290 | HERVHF_pro  | - |
| Homo_sapiens_6 | 123587604 | 123588007 | HERVHF_3LTR | - |
| Homo_sapiens_6 | 124890407 | 124890844 | HERVHF_5LTR | + |
| Homo_sapiens_6 | 124894190 | 124894510 | HERVHF_gag  | + |
| Homo_sapiens_6 | 124894940 | 124896785 | HERVHF_pol  | + |
| Homo_sapiens_6 | 124897330 | 124897764 | HERVHF_3LTR | + |
| Homo_sapiens_6 | 125701846 | 125702300 | HERVHF_5LTR | - |
| Homo_sapiens_6 | 125702812 | 125704819 | HERVHF_pol  | - |
| Homo_sapiens_6 | 125705125 | 125705535 | HERVHF_gag  | - |
| Homo_sapiens_6 | 125707310 | 125707764 | HERVHF_3LTR | - |
| Homo_sapiens_6 | 126848846 | 126849276 | HERVHF_5LTR | + |
| Homo_sapiens_6 | 126850727 | 126851197 | HERVHF_gag  | + |
| Homo_sapiens_6 | 126851224 | 126852054 | HERVHF_pro  | + |
| Homo_sapiens_6 | 126851557 | 126853403 | HERVHF_pol  | + |
| Homo_sapiens_6 | 126854026 | 126854456 | HERVHF_3LTR | + |
| Homo_sapiens_6 | 131295347 | 131295808 | HERVHF_5LTR | + |
| Homo_sapiens_6 | 131298228 | 131299742 | HERVHF_pol  | + |
| Homo_sapiens_6 | 131300740 | 131301206 | HERVHF_3LTR | + |
| Homo_sapiens_6 | 131338799 | 131339252 | HERVHF_5LTR | + |
| Homo_sapiens_6 | 131340935 | 131341324 | HERVHF_gag  | + |
| Homo_sapiens_6 | 131341378 | 131342177 | HERVHF_pro  | + |
| Homo_sapiens_6 | 131341770 | 131343672 | HERVHF_pol  | + |
| Homo_sapiens_6 | 131344112 | 131344566 | HERVHF_3LTR | + |
| Homo_sapiens_6 | 131901550 | 131902010 | HERVHF_5LTR | + |
| Homo_sapiens_6 | 131903830 | 131904159 | HERVHF_gag  | + |
| Homo_sapiens_6 | 131904166 | 131904993 | HERVHF_pro  | + |
| Homo_sapiens_6 | 131904451 | 131906364 | HERVHF_pol  | + |
| Homo_sapiens_6 | 131906969 | 131907420 | HERVHF_3LTR | + |
| Homo_sapiens_6 | 144923164 | 144923609 | HERVHF_5LTR | + |

|                |           |           |             |   |
|----------------|-----------|-----------|-------------|---|
| Homo_sapiens_6 | 144925945 | 144927834 | HERVHF_pol  | + |
| Homo_sapiens_6 | 144928414 | 144928866 | HERVHF_3LTR | + |
| Homo_sapiens_6 | 148639773 | 148640185 | HERVHF_5LTR | + |
| Homo_sapiens_6 | 148642529 | 148643080 | HERVHF_pro  | + |
| Homo_sapiens_6 | 148642703 | 148644508 | HERVHF_pol  | + |
| Homo_sapiens_6 | 148645099 | 148645512 | HERVHF_3LTR | + |
| Homo_sapiens_6 | 160286609 | 160287012 | HERVHF_5LTR | - |
| Homo_sapiens_6 | 160287604 | 160289407 | HERVHF_pol  | - |
| Homo_sapiens_6 | 160288982 | 160289581 | HERVHF_pro  | - |
| Homo_sapiens_6 | 160289925 | 160290245 | HERVHF_gag  | - |
| Homo_sapiens_6 | 160291906 | 160292315 | HERVHF_3LTR | - |
| Homo_sapiens_6 | 164338761 | 164339178 | HERVHF_5LTR | - |
| Homo_sapiens_6 | 164339767 | 164341641 | HERVHF_pol  | - |
| Homo_sapiens_6 | 164344350 | 164344780 | HERVHF_3LTR | - |
| Homo_sapiens_7 | 9457701   | 9458151   | HERVHF_5LTR | - |
| Homo_sapiens_7 | 9458606   | 9461567   | HERVHF_pol  | - |
| Homo_sapiens_7 | 9460893   | 9461804   | HERVHF_pro  | - |
| Homo_sapiens_7 | 9463767   | 9464220   | HERVHF_3LTR | - |
| Homo_sapiens_7 | 26024199  | 26024639  | HERVHF_5LTR | - |
| Homo_sapiens_7 | 26025479  | 26027163  | HERVHF_pol  | - |
| Homo_sapiens_7 | 26026567  | 26027451  | HERVHF_pro  | - |
| Homo_sapiens_7 | 26029364  | 26029809  | HERVHF_3LTR | - |
| Homo_sapiens_7 | 31466857  | 31467260  | HERVHF_5LTR | - |
| Homo_sapiens_7 | 31467710  | 31469839  | HERVHF_pol  | - |
| Homo_sapiens_7 | 31471973  | 31472383  | HERVHF_3LTR | - |
| Homo_sapiens_7 | 32838745  | 32839187  | HERVHF_5LTR | - |
| Homo_sapiens_7 | 32840141  | 32840968  | HERVHF_pol  | - |
| Homo_sapiens_7 | 32840339  | 32841040  | HERVHF_pro  | - |
| Homo_sapiens_7 | 32841194  | 32841577  | HERVHF_gag  | - |
| Homo_sapiens_7 | 32843099  | 32843543  | HERVHF_3LTR | - |
| Homo_sapiens_7 | 34300132  | 34300573  | HERVHF_5LTR | - |
| Homo_sapiens_7 | 34300978  | 34303075  | HERVHF_pol  | - |
| Homo_sapiens_7 | 34303183  | 34303482  | HERVHF_gag  | - |
| Homo_sapiens_7 | 34305132  | 34305573  | HERVHF_3LTR | - |
| Homo_sapiens_7 | 56144904  | 56145221  | HERVK_5LTR  | + |
| Homo_sapiens_7 | 56146786  | 56147721  | HERVK_pro   | + |
| Homo_sapiens_7 | 56147616  | 56149111  | HERVK_pol   | + |
| Homo_sapiens_7 | 56149952  | 56152862  | HERVK_env   | + |
| Homo_sapiens_7 | 56152939  | 56153268  | HERVK_3LTR  | + |
| Homo_sapiens_7 | 83459667  | 83460120  | HERVHF_5LTR | + |
| Homo_sapiens_7 | 83462141  | 83462971  | HERVHF_pro  | + |
| Homo_sapiens_7 | 83462429  | 83464125  | HERVHF_pol  | + |
| Homo_sapiens_7 | 83464935  | 83465385  | HERVHF_3LTR | + |
| Homo_sapiens_7 | 88540114  | 88540553  | HUERSP_5LTR | - |



|                |           |           |             |   |
|----------------|-----------|-----------|-------------|---|
| Homo_sapiens_7 | 88542213  | 88544382  | HUERSP_pol  | - |
| Homo_sapiens_7 | 88547818  | 88548264  | HUERSP_3LTR | - |
| Homo_sapiens_7 | 102973207 | 102973622 | HERVHF_5LTR | + |
| Homo_sapiens_7 | 102975230 | 102975898 | HERVHF_gag  | + |
| Homo_sapiens_7 | 102976371 | 102977021 | HERVHF_pro  | + |
| Homo_sapiens_7 | 102976449 | 102977042 | HERVHF_pol  | + |
| Homo_sapiens_7 | 102977224 | 102977607 | HERVHF_env  | + |
| Homo_sapiens_7 | 102978322 | 102978736 | HERVHF_3LTR | + |
| Homo_sapiens_7 | 113234431 | 113234903 | HERVHF_5LTR | - |
| Homo_sapiens_7 | 113235994 | 113236650 | HERVHF_pol  | - |
| Homo_sapiens_7 | 113236012 | 113236845 | HERVHF_pro  | - |
| Homo_sapiens_7 | 113236869 | 113237168 | HERVHF_gag  | - |
| Homo_sapiens_7 | 113238838 | 113239309 | HERVHF_3LTR | - |
| Homo_sapiens_7 | 120776620 | 120777025 | HERVHF_5LTR | - |
| Homo_sapiens_7 | 120777481 | 120780152 | HERVHF_pol  | - |
| Homo_sapiens_7 | 120779568 | 120780401 | HERVHF_pro  | - |
| Homo_sapiens_7 | 120782483 | 120782888 | HERVHF_3LTR | - |
| Homo_sapiens_7 | 125917557 | 125917967 | HERVHF_5LTR | + |
| Homo_sapiens_7 | 125920130 | 125920885 | HERVHF_pro  | + |
| Homo_sapiens_7 | 125920475 | 125922154 | HERVHF_pol  | + |
| Homo_sapiens_7 | 125923701 | 125924112 | HERVHF_3LTR | + |
| Homo_sapiens_7 | 141578060 | 141578418 | HERVHF_5LTR | - |
| Homo_sapiens_7 | 141579378 | 141581884 | HERVHF_pol  | - |
| Homo_sapiens_7 | 141581123 | 141581836 | HERVHF_pro  | - |
| Homo_sapiens_7 | 141582139 | 141582486 | HERVHF_gag  | - |
| Homo_sapiens_7 | 141584031 | 141584376 | HERVHF_3LTR | - |
| Homo_sapiens_7 | 148309409 | 148309795 | HERVHF_5LTR | - |
| Homo_sapiens_7 | 148310061 | 148310791 | HERVHF_env  | - |
| Homo_sapiens_7 | 148311723 | 148312985 | HERVHF_pol  | - |
| Homo_sapiens_7 | 148313374 | 148313883 | HERVHF_gag  | - |
| Homo_sapiens_7 | 148315201 | 148315584 | HERVHF_3LTR | - |
| Homo_sapiens_7 | 155238209 | 155238582 | HERVK_5LTR  | - |
| Homo_sapiens_7 | 155238821 | 155239129 | HERVK_env   | - |
| Homo_sapiens_7 | 155239444 | 155241440 | HERVK_pol   | - |
| Homo_sapiens_7 | 155241335 | 155242276 | HERVK_pro   | - |
| Homo_sapiens_7 | 155243682 | 155244070 | HERVK_3LTR  | - |
| Homo_sapiens_8 | 71674934  | 71675240  | HERVHF_5LTR | + |
| Homo_sapiens_8 | 71676972  | 71677343  | HERVHF_gag  | + |
| Homo_sapiens_8 | 71677387  | 71678241  | HERVHF_pro  | + |
| Homo_sapiens_8 | 71677678  | 71679621  | HERVHF_pol  | + |
| Homo_sapiens_8 | 71680214  | 71680514  | HERVHF_3LTR | + |
| Homo_sapiens_8 | 79386104  | 79386539  | HERVHF_5LTR | - |
| Homo_sapiens_8 | 79387308  | 79389168  | HERVHF_pol  | - |
| Homo_sapiens_8 | 79388557  | 79389695  | HERVHF_pro  | - |

|                |           |           |               |   |
|----------------|-----------|-----------|---------------|---|
| Homo_sapiens_8 | 79389480  | 79389920  | HERVHF_gag    | - |
| Homo_sapiens_8 | 79391251  | 79391685  | HERVHF_3LTR   | - |
| Homo_sapiens_8 | 90090224  | 90090661  | HERVHF_5LTR   | - |
| Homo_sapiens_8 | 90091063  | 90093283  | HERVHF_pol    | - |
| Homo_sapiens_8 | 90093495  | 90093794  | HERVHF_gag    | - |
| Homo_sapiens_8 | 90095435  | 90095869  | HERVHF_3LTR   | - |
| Homo_sapiens_8 | 97200769  | 97201222  | HERVHF_5LTR   | + |
| Homo_sapiens_8 | 97202976  | 97203299  | HERVHF_gag    | + |
| Homo_sapiens_8 | 97203392  | 97204225  | HERVHF_pro    | + |
| Homo_sapiens_8 | 97203683  | 97205588  | HERVHF_pol    | + |
| Homo_sapiens_8 | 97206202  | 97206658  | HERVHF_3LTR   | + |
| Homo_sapiens_8 | 99943774  | 99944145  | HERVHF_5LTR   | + |
| Homo_sapiens_8 | 99946395  | 99947180  | HERVHF_pro    | + |
| Homo_sapiens_8 | 99946638  | 99948330  | HERVHF_pol    | + |
| Homo_sapiens_8 | 99949257  | 99949628  | HERVHF_3LTR   | + |
| Homo_sapiens_8 | 104285074 | 104285911 | HERVHF_5LTR   | + |
| Homo_sapiens_8 | 104287994 | 104288407 | HERVHF_gag    | + |
| Homo_sapiens_8 | 104288703 | 104290422 | HERVHF_pol    | + |
| Homo_sapiens_8 | 104292094 | 104292933 | HERVHF_3LTR   | + |
| Homo_sapiens_8 | 114241603 | 114242056 | HERVHF_5LTR   | + |
| Homo_sapiens_8 | 114243394 | 114243717 | HERVHF_gag    | + |
| Homo_sapiens_8 | 114243814 | 114244647 | HERVHF_pro    | + |
| Homo_sapiens_8 | 114244279 | 114245799 | HERVHF_pol    | + |
| Homo_sapiens_8 | 114246631 | 114247085 | HERVHF_3LTR   | + |
| Homo_sapiens_8 | 114281683 | 114282133 | HERVHF_5LTR   | + |
| Homo_sapiens_8 | 114284546 | 114285295 | HERVHF_pro    | + |
| Homo_sapiens_8 | 114284753 | 114286697 | HERVHF_pol    | + |
| Homo_sapiens_8 | 114287268 | 114287727 | HERVHF_3LTR   | + |
| Homo_sapiens_8 | 128611900 | 128612367 | HERVHF_5LTR   | - |
| Homo_sapiens_8 | 128612758 | 128614884 | HERVHF_pol    | - |
| Homo_sapiens_8 | 128614363 | 128615175 | HERVHF_pro    | - |
| Homo_sapiens_8 | 128615199 | 128615585 | HERVHF_gag    | - |
| Homo_sapiens_8 | 128617178 | 128617638 | HERVHF_3LTR   | - |
| Homo_sapiens_8 | 131740750 | 131741164 | HERVHF_5LTR   | + |
| Homo_sapiens_8 | 131742853 | 131743164 | HERVHF_gag    | + |
| Homo_sapiens_8 | 131743449 | 131744030 | HERVHF_pro    | + |
| Homo_sapiens_8 | 131743623 | 131745774 | HERVHF_pol    | + |
| Homo_sapiens_8 | 131746225 | 131746637 | HERVHF_3LTR   | + |
| Homo_sapiens_8 | 132080235 | 132080688 | HERVHF_5LTR   | - |
| Homo_sapiens_8 | 132081082 | 132083067 | HERVHF_pol    | - |
| Homo_sapiens_8 | 132083498 | 132083827 | HERVHF_gag    | - |
| Homo_sapiens_8 | 132085544 | 132086002 | HERVHF_3LTR   | - |
| Homo_sapiens_9 | 6095047   | 6095357   | HSERVIII_5LTR | + |
| Homo_sapiens_9 | 6101427   | 6104024   | HSERVIII_pol  | + |

|                |          |          |               |   |
|----------------|----------|----------|---------------|---|
| Homo_sapiens_9 | 6107815  | 6108127  | HSERVIII_3LTR | + |
| Homo_sapiens_9 | 12948345 | 12948827 | HERVHF_5LTR   | + |
| Homo_sapiens_9 | 12950832 | 12951653 | HERVHF_pro    | + |
| Homo_sapiens_9 | 12951135 | 12953200 | HERVHF_pol    | + |
| Homo_sapiens_9 | 12953648 | 12954130 | HERVHF_3LTR   | + |
| Homo_sapiens_9 | 22658612 | 22658930 | HERVHF_5LTR   | - |
| Homo_sapiens_9 | 22659379 | 22661576 | HERVHF_pol    | - |
| Homo_sapiens_9 | 22661019 | 22661723 | HERVHF_pro    | - |
| Homo_sapiens_9 | 22663746 | 22664056 | HERVHF_3LTR   | - |
| Homo_sapiens_9 | 75351143 | 75351558 | HERVHF_5LTR   | - |
| Homo_sapiens_9 | 75351790 | 75352304 | HERVHF_env    | - |
| Homo_sapiens_9 | 75353426 | 75354751 | HERVHF_pol    | - |
| Homo_sapiens_9 | 75354209 | 75354994 | HERVHF_pro    | - |
| Homo_sapiens_9 | 75355041 | 75355397 | HERVHF_gag    | - |
| Homo_sapiens_9 | 75357173 | 75357576 | HERVHF_3LTR   | - |
| Homo_sapiens_9 | 78180694 | 78181106 | HERVHF_5LTR   | + |
| Homo_sapiens_9 | 78183315 | 78184118 | HERVHF_pro    | + |
| Homo_sapiens_9 | 78183576 | 78185683 | HERVHF_pol    | + |
| Homo_sapiens_9 | 78186409 | 78186822 | HERVHF_3LTR   | + |
| Homo_sapiens_9 | 80137297 | 80137640 | HERVHF_5LTR   | + |
| Homo_sapiens_9 | 80139559 | 80139885 | HERVHF_gag    | + |
| Homo_sapiens_9 | 80140314 | 80142260 | HERVHF_pol    | + |
| Homo_sapiens_9 | 80142712 | 80143055 | HERVHF_3LTR   | + |
| Homo_sapiens_9 | 82701562 | 82702004 | HERVHF_5LTR   | - |
| Homo_sapiens_9 | 82702400 | 82703783 | HERVHF_pol    | - |
| Homo_sapiens_9 | 82703148 | 82703894 | HERVHF_pro    | - |
| Homo_sapiens_9 | 82703981 | 82704388 | HERVHF_gag    | - |
| Homo_sapiens_9 | 82705845 | 82706287 | HERVHF_3LTR   | - |
| Homo_sapiens_9 | 82883732 | 82884185 | HERVHF_5LTR   | + |
| Homo_sapiens_9 | 82886223 | 82887056 | HERVHF_pro    | + |
| Homo_sapiens_9 | 82886514 | 82888590 | HERVHF_pol    | + |
| Homo_sapiens_9 | 82889038 | 82889491 | HERVHF_3LTR   | + |
| Homo_sapiens_9 | 85458329 | 85458782 | HERVHF_5LTR   | + |
| Homo_sapiens_9 | 85460704 | 85461087 | HERVHF_gag    | + |
| Homo_sapiens_9 | 85461120 | 85461926 | HERVHF_pro    | + |
| Homo_sapiens_9 | 85461315 | 85463744 | HERVHF_pol    | + |
| Homo_sapiens_9 | 85465130 | 85466268 | HERVHF_env    | + |
| Homo_sapiens_9 | 85466509 | 85466955 | HERVHF_3LTR   | + |
| Homo_sapiens_9 | 93347586 | 93347887 | HERVHF_5LTR   | + |
| Homo_sapiens_9 | 93349762 | 93350079 | HERVHF_gag    | + |
| Homo_sapiens_9 | 93350086 | 93350916 | HERVHF_pro    | + |
| Homo_sapiens_9 | 93350374 | 93352298 | HERVHF_pol    | + |
| Homo_sapiens_9 | 93352520 | 93352833 | HERVHF_env    | + |
| Homo_sapiens_9 | 93352901 | 93353212 | HERVHF_3LTR   | + |

|                |           |           |             |   |
|----------------|-----------|-----------|-------------|---|
| Homo_sapiens_9 | 94539872  | 94540300  | HERVHF_5LTR | + |
| Homo_sapiens_9 | 94541972  | 94542271  | HERVHF_gag  | + |
| Homo_sapiens_9 | 94542717  | 94544296  | HERVHF_pol  | + |
| Homo_sapiens_9 | 94545091  | 94545512  | HERVHF_3LTR | + |
| Homo_sapiens_9 | 99669781  | 99670236  | HERVHF_5LTR | + |
| Homo_sapiens_9 | 99672085  | 99672528  | HERVHF_gag  | + |
| Homo_sapiens_9 | 99672639  | 99673226  | HERVHF_pro  | + |
| Homo_sapiens_9 | 99672836  | 99675041  | HERVHF_pol  | + |
| Homo_sapiens_9 | 99675451  | 99675904  | HERVHF_3LTR | + |
| Homo_sapiens_9 | 100140183 | 100140620 | HERVHF_5LTR | - |
| Homo_sapiens_9 | 100141584 | 100143661 | HERVHF_pol  | - |
| Homo_sapiens_9 | 100143990 | 100144394 | HERVHF_gag  | - |
| Homo_sapiens_9 | 100146114 | 100146555 | HERVHF_3LTR | - |
| Homo_sapiens_9 | 115174661 | 115175062 | HERVHF_5LTR | - |
| Homo_sapiens_9 | 115175687 | 115177590 | HERVHF_pol  | - |
| Homo_sapiens_9 | 115177069 | 115177890 | HERVHF_pro  | - |
| Homo_sapiens_9 | 115179935 | 115180342 | HERVHF_3LTR | - |
| Homo_sapiens_9 | 115473181 | 115473637 | HERVHF_5LTR | + |
| Homo_sapiens_9 | 115475420 | 115475800 | HERVHF_gag  | + |
| Homo_sapiens_9 | 115476023 | 115476676 | HERVHF_pro  | + |
| Homo_sapiens_9 | 115476248 | 115478150 | HERVHF_pol  | + |
| Homo_sapiens_9 | 115478470 | 115478923 | HERVHF_3LTR | + |
| Homo_sapiens_9 | 115839176 | 115839628 | HERVHF_5LTR | - |
| Homo_sapiens_9 | 115840035 | 115842170 | HERVHF_pol  | - |
| Homo_sapiens_9 | 115841628 | 115842458 | HERVHF_pro  | - |
| Homo_sapiens_9 | 115842465 | 115842794 | HERVHF_gag  | - |
| Homo_sapiens_9 | 115844477 | 115844929 | HERVHF_3LTR | - |
| Homo_sapiens_9 | 121790001 | 121790452 | HERVHF_5LTR | + |
| Homo_sapiens_9 | 121792163 | 121792696 | HERVHF_gag  | + |
| Homo_sapiens_9 | 121792802 | 121793656 | HERVHF_pro  | + |
| Homo_sapiens_9 | 121792997 | 121794402 | HERVHF_pol  | + |
| Homo_sapiens_9 | 121795640 | 121796155 | HERVHF_env  | + |
| Homo_sapiens_9 | 121796319 | 121796773 | HERVHF_3LTR | + |
| Homo_sapiens_X | 16043840  | 16044422  | HERVHF_5LTR | - |
| Homo_sapiens_X | 16045580  | 16047522  | HERVHF_pol  | - |
| Homo_sapiens_X | 16047133  | 16047696  | HERVHF_pro  | - |
| Homo_sapiens_X | 16050413  | 16050985  | HERVHF_3LTR | - |
| Homo_sapiens_X | 69697081  | 69697422  | HERVHF_5LTR | - |
| Homo_sapiens_X | 69697717  | 69698226  | HERVHF_env  | - |
| Homo_sapiens_X | 69698607  | 69700744  | HERVHF_pol  | - |
| Homo_sapiens_X | 69701629  | 69702009  | HERVHF_gag  | - |
| Homo_sapiens_X | 69703482  | 69703828  | HERVHF_3LTR | - |
| Homo_sapiens_X | 71264372  | 71264714  | HERVHF_5LTR | + |
| Homo_sapiens_X | 71266244  | 71266657  | HERVHF_gag  | + |

|                |           |           |               |   |
|----------------|-----------|-----------|---------------|---|
| Homo_sapiens_X | 71266704  | 71267651  | HERVHF_pro    | + |
| Homo_sapiens_X | 71267253  | 71269614  | HERVHF_pol    | + |
| Homo_sapiens_X | 71271762  | 71272124  | HERVHF_env    | + |
| Homo_sapiens_X | 71272292  | 71272628  | HERVHF_3LTR   | + |
| Homo_sapiens_X | 87681680  | 87682131  | HERVHF_5LTR   | + |
| Homo_sapiens_X | 87684041  | 87684364  | HERVHF_gag    | + |
| Homo_sapiens_X | 87684371  | 87685201  | HERVHF_pro    | + |
| Homo_sapiens_X | 87684659  | 87686461  | HERVHF_pol    | + |
| Homo_sapiens_X | 87687194  | 87687646  | HERVHF_3LTR   | + |
| Homo_sapiens_X | 90773314  | 90773760  | HERVHF_5LTR   | - |
| Homo_sapiens_X | 90774538  | 90776292  | HERVHF_pol    | - |
| Homo_sapiens_X | 90775783  | 90776499  | HERVHF_pro    | - |
| Homo_sapiens_X | 90776607  | 90776906  | HERVHF_gag    | - |
| Homo_sapiens_X | 90778707  | 90779155  | HERVHF_3LTR   | - |
| Homo_sapiens_X | 92273087  | 92273521  | HERVHF_5LTR   | - |
| Homo_sapiens_X | 92273918  | 92276034  | HERVHF_pol    | - |
| Homo_sapiens_X | 92275513  | 92276319  | HERVHF_pro    | - |
| Homo_sapiens_X | 92278361  | 92278800  | HERVHF_3LTR   | - |
| Homo_sapiens_X | 92824428  | 92824882  | HERVHF_5LTR   | + |
| Homo_sapiens_X | 92826553  | 92826966  | HERVHF_gag    | + |
| Homo_sapiens_X | 92827175  | 92827822  | HERVHF_pro    | + |
| Homo_sapiens_X | 92827220  | 92828521  | HERVHF_pol    | + |
| Homo_sapiens_X | 92828895  | 92829347  | HERVHF_3LTR   | + |
| Homo_sapiens_X | 94698818  | 94699270  | HERVHF_5LTR   | - |
| Homo_sapiens_X | 94699849  | 94701688  | HERVHF_pol    | - |
| Homo_sapiens_X | 94701248  | 94701832  | HERVHF_pro    | - |
| Homo_sapiens_X | 94704637  | 94705089  | HERVHF_3LTR   | - |
| Homo_sapiens_X | 94819302  | 94819615  | HSERVIII_5LTR | - |
| Homo_sapiens_X | 94820732  | 94823586  | HSERVIII_pol  | - |
| Homo_sapiens_X | 94828209  | 94828529  | HSERVIII_3LTR | - |
| Homo_sapiens_X | 98524240  | 98524704  | HERVHF_5LTR   | - |
| Homo_sapiens_X | 98525292  | 98527235  | HERVHF_pol    | - |
| Homo_sapiens_X | 98526693  | 98527523  | HERVHF_pro    | - |
| Homo_sapiens_X | 98527530  | 98527850  | HERVHF_gag    | - |
| Homo_sapiens_X | 98529618  | 98530078  | HERVHF_3LTR   | - |
| Homo_sapiens_X | 109178342 | 109178814 | HERVHF_5LTR   | + |
| Homo_sapiens_X | 109181321 | 109183264 | HERVHF_pol    | + |
| Homo_sapiens_X | 109183707 | 109184176 | HERVHF_3LTR   | + |
| Homo_sapiens_X | 111543806 | 111544260 | HERVHF_5LTR   | + |
| Homo_sapiens_X | 111546072 | 111546392 | HERVHF_gag    | + |
| Homo_sapiens_X | 111546382 | 111547230 | HERVHF_pro    | + |
| Homo_sapiens_X | 111546688 | 111548769 | HERVHF_pol    | + |
| Homo_sapiens_X | 111549221 | 111549675 | HERVHF_3LTR   | + |
| Homo_sapiens_X | 112530380 | 112530836 | HERVHF_5LTR   | + |

|                      |           |           |                   |   |
|----------------------|-----------|-----------|-------------------|---|
| Homo_sapiens_X       | 112533516 | 112535451 | HERVHF_pol        | + |
| Homo_sapiens_X       | 112535906 | 112536360 | HERVHF_3LTR       | + |
| Homo_sapiens_X       | 114601269 | 114601663 | HERVHF_5LTR       | - |
| Homo_sapiens_X       | 114602179 | 114604363 | HERVHF_pol        | - |
| Homo_sapiens_X       | 114603725 | 114604477 | HERVHF_pro        | - |
| Homo_sapiens_X       | 114604561 | 114604974 | HERVHF_gag        | - |
| Homo_sapiens_X       | 114606792 | 114607167 | HERVHF_3LTR       | - |
| Homo_sapiens_X       | 122222003 | 122222455 | HERVHF_5LTR       | + |
| Homo_sapiens_X       | 122224097 | 122224477 | HERVHF_gag        | + |
| Homo_sapiens_X       | 122224510 | 122225313 | HERVHF_pro        | + |
| Homo_sapiens_X       | 122224705 | 122226744 | HERVHF_pol        | + |
| Homo_sapiens_X       | 122227333 | 122227787 | HERVHF_3LTR       | + |
| Homo_sapiens_X       | 142423374 | 142423787 | HERVHF_5LTR       | - |
| Homo_sapiens_X       | 142424523 | 142426496 | HERVHF_pol        | - |
| Homo_sapiens_X       | 142425975 | 142426775 | HERVHF_pro        | - |
| Homo_sapiens_X       | 142426911 | 142427264 | HERVHF_gag        | - |
| Homo_sapiens_X       | 142428547 | 142428961 | HERVHF_3LTR       | - |
| Homo_sapiens_X       | 149073591 | 149073909 | HSERVIII_5LTR     | + |
| Homo_sapiens_X       | 149075763 | 149076530 | HSERVIII_pol      | + |
| Homo_sapiens_X       | 149079939 | 149080259 | HSERVIII_3LTR     | + |
| Homo_sapiens_X       | 149749529 | 149750009 | HSERVIII_5LTR     | - |
| Homo_sapiens_X       | 149751046 | 149751830 | HSERVIII_pol      | - |
| Homo_sapiens_X       | 149753983 | 149754464 | HSERVIII_3LTR     | - |
| Homo_sapiens_Y       | 4355391   | 4355841   | HERVHF_5LTR       | - |
| Homo_sapiens_Y       | 4356610   | 4358372   | HERVHF_pol        | - |
| Homo_sapiens_Y       | 4357809   | 4358462   | HERVHF_pro        | - |
| Homo_sapiens_Y       | 4358686   | 4358994   | HERVHF_gag        | - |
| Homo_sapiens_Y       | 4360781   | 4361230   | HERVHF_3LTR       | - |
| Homo_sapiens_Y       | 5324785   | 5325239   | HERVHF_5LTR       | - |
| Homo_sapiens_Y       | 5325640   | 5327757   | HERVHF_pol        | - |
| Homo_sapiens_Y       | 5327215   | 5327853   | HERVHF_pro        | - |
| Homo_sapiens_Y       | 5328124   | 5328591   | HERVHF_gag        | - |
| Homo_sapiens_Y       | 5329976   | 5330428   | HERVHF_3LTR       | - |
| Homo_sapiens_Y       | 5941111   | 5941562   | HERVHF_5LTR       | + |
| Homo_sapiens_Y       | 5943321   | 5943656   | HERVHF_gag        | + |
| Homo_sapiens_Y       | 5943693   | 5944472   | HERVHF_pro        | + |
| Homo_sapiens_Y       | 5943951   | 5945213   | HERVHF_pol        | + |
| Homo_sapiens_Y       | 5945587   | 5946038   | HERVHF_3LTR       | + |
| Hoolock_hoolock_ctg1 | 10341805  | 10342247  | Unknown_HERV_5LTR | - |
| Hoolock_hoolock_ctg1 | 10342812  | 10344544  | Unknown_HERV_pol  | - |
| Hoolock_hoolock_ctg1 | 10344866  | 10345165  | Unknown_HERV_gag  | - |
| Hoolock_hoolock_ctg1 | 10346729  | 10347169  | Unknown_HERV_3LTR | - |
| Hoolock_hoolock_ctg1 | 50709621  | 50710034  | HERVHF_5LTR       | + |
| Hoolock_hoolock_ctg1 | 50711555  | 50711878  | HERVHF_gag        | + |

|                              |          |          |                   |   |
|------------------------------|----------|----------|-------------------|---|
| Hoolock_hoolock_ctg1         | 50712064 | 50712819 | HERVHF_pro        | + |
| Hoolock_hoolock_ctg1         | 50712469 | 50714426 | HERVHF_pol        | + |
| Hoolock_hoolock_ctg1         | 50714858 | 50715274 | HERVHF_3LTR       | + |
| Hoolock_hoolock_ctg14        | 33704346 | 33704773 | HERVHF_5LTR       | + |
| Hoolock_hoolock_ctg14        | 33706804 | 33707625 | HERVHF_pro        | + |
| Hoolock_hoolock_ctg14        | 33707224 | 33709113 | HERVHF_pol        | + |
| Hoolock_hoolock_ctg14        | 33709544 | 33709958 | HERVHF_3LTR       | + |
| Hoolock_hoolock_ctg15        | 4271648  | 4271952  | Unknown_HERV_5LTR | + |
| Hoolock_hoolock_ctg15        | 4276107  | 4278233  | Unknown_HERV_pol  | + |
| Hoolock_hoolock_ctg15        | 4281939  | 4282243  | Unknown_HERV_3LTR | + |
| Hoolock_hoolock_ctg15        | 29232753 | 29233149 | HERVIPADP_5LTR    | - |
| Hoolock_hoolock_ctg15        | 29233696 | 29234016 | HERVIPADP_env     | - |
| Hoolock_hoolock_ctg15        | 29235123 | 29238328 | HERVIPADP_pol     | - |
| Hoolock_hoolock_ctg15        | 29241048 | 29241421 | HERVIPADP_3LTR    | - |
| Hoolock_hoolock_ctg15        | 37505496 | 37505919 | HERVIPADP_5LTR    | + |
| Hoolock_hoolock_ctg15        | 37507593 | 37508000 | HERVIPADP_gag     | + |
| Hoolock_hoolock_ctg15        | 37508423 | 37511031 | HERVIPADP_pol     | + |
| Hoolock_hoolock_ctg15        | 37513225 | 37513818 | HERVIPADP_env     | + |
| Hoolock_hoolock_ctg15        | 37513902 | 37514321 | HERVIPADP_3LTR    | + |
| Hoolock_hoolock_ctg150537827 | 538222   |          | HERVHF_5LTR       | + |
| Hoolock_hoolock_ctg150539873 | 540202   |          | HERVHF_gag        | + |
| Hoolock_hoolock_ctg150540322 | 541164   |          | HERVHF_pro        | + |
| Hoolock_hoolock_ctg150540789 | 542258   |          | HERVHF_pol        | + |
| Hoolock_hoolock_ctg150543059 | 543459   |          | HERVHF_3LTR       | + |
| Hoolock_hoolock_ctg16        | 5375495  | 5375941  | HERVIPADP_5LTR    | + |
| Hoolock_hoolock_ctg16        | 5377561  | 5379294  | HERVIPADP_pol     | + |
| Hoolock_hoolock_ctg16        | 5381870  | 5382307  | HERVIPADP_env     | + |
| Hoolock_hoolock_ctg16        | 5382417  | 5382863  | HERVIPADP_3LTR    | + |
| Hoolock_hoolock_ctg16        | 21920015 | 21920518 | HERVIPADP_5LTR    | + |
| Hoolock_hoolock_ctg16        | 21922067 | 21922447 | HERVIPADP_gag     | + |
| Hoolock_hoolock_ctg16        | 21923383 | 21925878 | HERVIPADP_pol     | + |
| Hoolock_hoolock_ctg16        | 21927769 | 21928248 | HERVIPADP_env     | + |
| Hoolock_hoolock_ctg16        | 21928269 | 21928761 | HERVIPADP_3LTR    | + |
| Hoolock_hoolock_ctg20        | 6657273  | 6657722  | HERVK_5LTR        | + |
| Hoolock_hoolock_ctg20        | 6659104  | 6660108  | HERVK_pro         | + |
| Hoolock_hoolock_ctg20        | 6661254  | 6663057  | HERVK_pol         | + |
| Hoolock_hoolock_ctg20        | 6663629  | 6663962  | HERVK_env         | + |
| Hoolock_hoolock_ctg20        | 6664112  | 6664565  | HERVK_3LTR        | + |
| Hoolock_hoolock_ctg22        | 17835722 | 17836148 | HERVIPADP_5LTR    | + |
| Hoolock_hoolock_ctg22        | 17838480 | 17842482 | HERVIPADP_pol     | + |
| Hoolock_hoolock_ctg22        | 17844569 | 17844982 | HERVIPADP_env     | + |
| Hoolock_hoolock_ctg22        | 17845095 | 17845540 | HERVIPADP_3LTR    | + |
| Hoolock_hoolock_ctg24        | 23640291 | 23640704 | HERVHF_5LTR       | - |
| Hoolock_hoolock_ctg24        | 23641295 | 23643100 | HERVHF_pol        | - |

|                        |          |          |                   |   |
|------------------------|----------|----------|-------------------|---|
| Hoolock_hoolock_ctg24  | 23643123 | 23643521 | HERVHF_pro        | - |
| Hoolock_hoolock_ctg24  | 23643618 | 23643917 | HERVHF_gag        | - |
| Hoolock_hoolock_ctg24  | 23645553 | 23645967 | HERVHF_3LTR       | - |
| Hoolock_hoolock_ctg3   | 60881913 | 60882364 | HERVHF_5LTR       | - |
| Hoolock_hoolock_ctg3   | 60882450 | 60883309 | HERVHF_env        | - |
| Hoolock_hoolock_ctg3   | 60884633 | 60886466 | HERVHF_pol        | - |
| Hoolock_hoolock_ctg3   | 60886128 | 60886949 | HERVHF_pro        | - |
| Hoolock_hoolock_ctg3   | 60887003 | 60887383 | HERVHF_gag        | - |
| Hoolock_hoolock_ctg3   | 60888639 | 60889095 | HERVHF_3LTR       | - |
| Hoolock_hoolock_ctg317 | 103857   | 104239   | HSERVIII_5LTR     | - |
| Hoolock_hoolock_ctg317 | 104384   | 104965   | HSERVIII_pol      | - |
| Hoolock_hoolock_ctg317 | 106159   | 106539   | HSERVIII_3LTR     | - |
| Hoolock_hoolock_ctg38  | 4317241  | 4317701  | HERVIPADP_5LTR    | + |
| Hoolock_hoolock_ctg38  | 4319880  | 4322528  | HERVIPADP_pol     | + |
| Hoolock_hoolock_ctg38  | 4324284  | 4324592  | HERVIPADP_env     | + |
| Hoolock_hoolock_ctg38  | 4325240  | 4325697  | HERVIPADP_3LTR    | + |
| Hoolock_hoolock_ctg4   | 22621914 | 22622269 | HSERVIII_5LTR     | - |
| Hoolock_hoolock_ctg4   | 22622918 | 22625438 | HSERVIII_pol      | - |
| Hoolock_hoolock_ctg4   | 22627593 | 22627943 | HSERVIII_3LTR     | - |
| Hoolock_hoolock_ctg4   | 44805229 | 44805646 | HERVHF_5LTR       | + |
| Hoolock_hoolock_ctg4   | 44806130 | 44808928 | HERVHF_pol        | + |
| Hoolock_hoolock_ctg4   | 44809110 | 44809508 | HERVHF_env        | + |
| Hoolock_hoolock_ctg4   | 44810213 | 44810627 | HERVHF_3LTR       | + |
| Hoolock_hoolock_ctg4   | 66853672 | 66854081 | HERVHF_5LTR       | + |
| Hoolock_hoolock_ctg4   | 66856680 | 66857261 | HERVHF_pro        | + |
| Hoolock_hoolock_ctg4   | 66856854 | 66858672 | HERVHF_pol        | + |
| Hoolock_hoolock_ctg4   | 66859258 | 66859678 | HERVHF_3LTR       | + |
| Hoolock_hoolock_ctg40  | 10723619 | 10723931 | HERVHF_5LTR       | + |
| Hoolock_hoolock_ctg40  | 10724984 | 10725838 | HERVHF_pol        | + |
| Hoolock_hoolock_ctg40  | 10727833 | 10728273 | HERVHF_env        | + |
| Hoolock_hoolock_ctg40  | 10728579 | 10728891 | HERVHF_3LTR       | + |
| Hoolock_hoolock_ctg45  | 14796138 | 14796476 | HERVHF_5LTR       | - |
| Hoolock_hoolock_ctg45  | 14797920 | 14799208 | HERVHF_pol        | - |
| Hoolock_hoolock_ctg45  | 14798648 | 14799448 | HERVHF_pro        | - |
| Hoolock_hoolock_ctg45  | 14799545 | 14800039 | HERVHF_gag        | - |
| Hoolock_hoolock_ctg45  | 14801542 | 14801865 | HERVHF_3LTR       | - |
| Hoolock_hoolock_ctg64  | 4730052  | 4730380  | Unknown_HERV_5LTR | - |
| Hoolock_hoolock_ctg64  | 4732169  | 4733372  | Unknown_HERV_pol  | - |
| Hoolock_hoolock_ctg64  | 4733492  | 4733824  | Unknown_HERV_pro  | - |
| Hoolock_hoolock_ctg64  | 4733919  | 4734260  | Unknown_HERV_gag  | - |
| Hoolock_hoolock_ctg64  | 4735872  | 4736190  | Unknown_HERV_3LTR | - |
| Hoolock_hoolock_ctg75  | 2738005  | 2738365  | HSERVIII_5LTR     | + |
| Hoolock_hoolock_ctg75  | 2747283  | 2748600  | HSERVIII_pol      | + |
| Hoolock_hoolock_ctg75  | 2752651  | 2752995  | HSERVIII_3LTR     | + |



|                        |          |          |                 |   |
|------------------------|----------|----------|-----------------|---|
| Hoolock_hoolock_ctg76  | 4784530  | 4785017  | HERVK_5LTR-     |   |
| Hoolock_hoolock_ctg76  | 4786255  | 4787157  | HERVK_pol       | - |
| Hoolock_hoolock_ctg76  | 4786902  | 4787843  | HERVK_pro       | - |
| Hoolock_hoolock_ctg76  | 4788340  | 4788807  | HERVK_gag       | - |
| Hoolock_hoolock_ctg76  | 4789251  | 4789735  | HERVK_3LTR-     |   |
| Hoolock_hoolock_ctg78  | 7191727  | 7192137  | HERVHF_5LTR     | - |
| Hoolock_hoolock_ctg78  | 7192549  | 7194507  | HERVHF_pol      | - |
| Hoolock_hoolock_ctg78  | 7194999  | 7195322  | HERVHF_gag      | - |
| Hoolock_hoolock_ctg78  | 7196972  | 7197384  | HERVHF_3LTR     | - |
| Hoolock_hoolock_ctg80  | 3413298  | 3413729  | HERVHF_5LTR     | - |
| Hoolock_hoolock_ctg80  | 3414184  | 3415963  | HERVHF_pol      | - |
| Hoolock_hoolock_ctg80  | 3415591  | 3416349  | HERVHF_pro      | - |
| Hoolock_hoolock_ctg80  | 3416567  | 3416950  | HERVHF_gag      | - |
| Hoolock_hoolock_ctg80  | 3418549  | 3418973  | HERVHF_3LTR     | - |
| Hoolock_hoolock_ctg83  | 16891941 | 16892353 | HERVHF_5LTR     | + |
| Hoolock_hoolock_ctg83  | 16894354 | 16894866 | HERVHF_pro      | + |
| Hoolock_hoolock_ctg83  | 16894821 | 16896325 | HERVHF_pol      | + |
| Hoolock_hoolock_ctg83  | 16897143 | 16897554 | HERVHF_3LTR     | + |
| Hoolock_hoolock_ctg86  | 6360412  | 6360805  | HERVIPADP_5LTR- |   |
| Hoolock_hoolock_ctg86  | 6361062  | 6361721  | HERVIPADP_env   | - |
| Hoolock_hoolock_ctg86  | 6362894  | 6366003  | HERVIPADP_pol   | - |
| Hoolock_hoolock_ctg86  | 6368978  | 6369378  | HERVIPADP_3LTR- |   |
| Hoolock_hoolock_ctg94  | 7292051  | 7292362  | HERVHF_5LTR     | - |
| Hoolock_hoolock_ctg94  | 7294637  | 7295335  | HERVHF_pol      | - |
| Hoolock_hoolock_ctg94  | 7295730  | 7296335  | HERVHF_gag      | - |
| Hoolock_hoolock_ctg94  | 7297042  | 7297354  | HERVHF_3LTR     | - |
| Hylobates_lar_ContigUN | 22320383 | 22320721 | HERVHF_5LTR     | + |
| Hylobates_lar_ContigUN | 22322151 | 22322480 | HERVHF_gag      | + |
| Hylobates_lar_ContigUN | 22322969 | 22324627 | HERVHF_pol      | + |
| Hylobates_lar_ContigUN | 22325812 | 22326186 | HERVHF_env      | + |
| Hylobates_lar_ContigUN | 22326901 | 22327248 | HERVHF_3LTR     | + |
| Hylobates_lar_LG01     | 18360753 | 18361129 | HERVHF_5LTR     | - |
| Hylobates_lar_LG01     | 18361562 | 18363526 | HERVHF_pol      | - |
| Hylobates_lar_LG01     | 18363119 | 18363700 | HERVHF_pro      | - |
| Hylobates_lar_LG01     | 18366061 | 18366427 | HERVHF_3LTR     | - |
| Hylobates_lar_LG01     | 19436675 | 19437067 | HERVHF_5LTR     | + |
| Hylobates_lar_LG01     | 19438679 | 19439020 | HERVHF_gag      | + |
| Hylobates_lar_LG01     | 19439128 | 19439952 | HERVHF_pro      | + |
| Hylobates_lar_LG01     | 19439419 | 19442930 | HERVHF_pol      | + |
| Hylobates_lar_LG01     | 19443389 | 19443787 | HERVHF_3LTR     | + |
| Hylobates_lar_LG01     | 34388720 | 34389174 | HERVHF_5LTR     | - |
| Hylobates_lar_LG01     | 34390190 | 34391933 | HERVHF_pol      | - |
| Hylobates_lar_LG01     | 34392142 | 34392555 | HERVHF_pro      | - |
| Hylobates_lar_LG01     | 34392545 | 34392868 | HERVHF_gag      | - |

|                    |           |           |             |   |
|--------------------|-----------|-----------|-------------|---|
| Hylobates_lar_LG01 | 34394862  | 34395317  | HERVHF_3LTR | - |
| Hylobates_lar_LG01 | 57005269  | 57005578  | HERVHF_5LTR | - |
| Hylobates_lar_LG01 | 57006257  | 57008302  | HERVHF_pol  | - |
| Hylobates_lar_LG01 | 57007760  | 57008539  | HERVHF_pro  | - |
| Hylobates_lar_LG01 | 57008668  | 57009030  | HERVHF_gag  | - |
| Hylobates_lar_LG01 | 57010485  | 57010810  | HERVHF_3LTR | - |
| Hylobates_lar_LG01 | 79013517  | 79013946  | HERVHF_5LTR | - |
| Hylobates_lar_LG01 | 79014567  | 79016466  | HERVHF_pol  | - |
| Hylobates_lar_LG01 | 79015870  | 79016754  | HERVHF_pro  | - |
| Hylobates_lar_LG01 | 79016761  | 79017084  | HERVHF_gag  | - |
| Hylobates_lar_LG01 | 79018792  | 79019222  | HERVHF_3LTR | - |
| Hylobates_lar_LG01 | 88551318  | 88551758  | HERVHF_5LTR | + |
| Hylobates_lar_LG01 | 88554055  | 88555984  | HERVHF_pol  | + |
| Hylobates_lar_LG01 | 88558604  | 88559045  | HERVHF_3LTR | + |
| Hylobates_lar_LG01 | 107779924 | 107780381 | HERVHF_5LTR | + |
| Hylobates_lar_LG01 | 107781820 | 107782119 | HERVHF_gag  | + |
| Hylobates_lar_LG01 | 107782176 | 107782691 | HERVHF_pro  | + |
| Hylobates_lar_LG01 | 107782642 | 107785364 | HERVHF_pol  | + |
| Hylobates_lar_LG01 | 107785773 | 107786235 | HERVHF_3LTR | + |
| Hylobates_lar_LG01 | 158668585 | 158668997 | HERVHF_5LTR | - |
| Hylobates_lar_LG01 | 158670054 | 158672141 | HERVHF_pol  | - |
| Hylobates_lar_LG01 | 158671566 | 158672246 | HERVHF_pro  | - |
| Hylobates_lar_LG01 | 158674472 | 158674898 | HERVHF_3LTR | - |
| Hylobates_lar_LG01 | 200427659 | 200428001 | HERVHF_5LTR | + |
| Hylobates_lar_LG01 | 200429293 | 200429676 | HERVHF_gag  | + |
| Hylobates_lar_LG01 | 200430299 | 200431003 | HERVHF_pro  | + |
| Hylobates_lar_LG01 | 200430422 | 200433957 | HERVHF_pol  | + |
| Hylobates_lar_LG01 | 200434748 | 200435872 | HERVHF_env  | + |
| Hylobates_lar_LG01 | 200436085 | 200436438 | HERVHF_3LTR | + |
| Hylobates_lar_LG01 | 214541123 | 214541584 | HERVHF_5LTR | + |
| Hylobates_lar_LG01 | 214543353 | 214544132 | HERVHF_pro  | + |
| Hylobates_lar_LG01 | 214543590 | 214545859 | HERVHF_pol  | + |
| Hylobates_lar_LG01 | 214546531 | 214546999 | HERVHF_3LTR | + |
| Hylobates_lar_LG01 | 215486824 | 215487245 | HERVHF_5LTR | - |
| Hylobates_lar_LG01 | 215487626 | 215489613 | HERVHF_pol  | - |
| Hylobates_lar_LG01 | 215492137 | 215492578 | HERVHF_3LTR | - |
| Hylobates_lar_LG01 | 218208061 | 218208504 | HERVHF_5LTR | + |
| Hylobates_lar_LG01 | 218210090 | 218210473 | HERVHF_gag  | + |
| Hylobates_lar_LG01 | 218211668 | 218212219 | HERVHF_pro  | + |
| Hylobates_lar_LG01 | 218211707 | 218213628 | HERVHF_pol  | + |
| Hylobates_lar_LG01 | 218214198 | 218214645 | HERVHF_3LTR | + |
| Hylobates_lar_LG01 | 219604541 | 219604953 | HERVHF_5LTR | + |
| Hylobates_lar_LG01 | 219606906 | 219607229 | HERVHF_gag  | + |
| Hylobates_lar_LG01 | 219607558 | 219608154 | HERVHF_pro  | + |

|                    |           |           |                |   |
|--------------------|-----------|-----------|----------------|---|
| Hylobates_lar_LG01 | 219607564 | 219609409 | HERVHF_pol     | + |
| Hylobates_lar_LG01 | 219610142 | 219610558 | HERVHF_3LTR    | + |
| Hylobates_lar_LG01 | 244298782 | 244299162 | HERVHF_5LTR    | - |
| Hylobates_lar_LG01 | 244299409 | 244300002 | HERVHF_env     | - |
| Hylobates_lar_LG01 | 244301102 | 244302429 | HERVHF_pol     | - |
| Hylobates_lar_LG01 | 244302782 | 244303258 | HERVHF_gag     | - |
| Hylobates_lar_LG01 | 244304632 | 244305011 | HERVHF_3LTR    | - |
| Hylobates_lar_LG01 | 247602658 | 247602979 | HERVK_5LTR     | - |
| Hylobates_lar_LG01 | 247603235 | 247603546 | HERVK_env      | - |
| Hylobates_lar_LG01 | 247604075 | 247607241 | HERVK_pol      | - |
| Hylobates_lar_LG01 | 247607318 | 247607937 | HERVK_pro      | - |
| Hylobates_lar_LG01 | 247608612 | 247608913 | HERVK_3LTR     | - |
| Hylobates_lar_LG02 | 27595104  | 27595545  | HERVHF_5LTR    | + |
| Hylobates_lar_LG02 | 27595808  | 27597612  | HERVHF_pol     | + |
| Hylobates_lar_LG02 | 27598466  | 27598852  | HERVHF_env     | + |
| Hylobates_lar_LG02 | 27599080  | 27599515  | HERVHF_3LTR    | + |
| Hylobates_lar_LG02 | 51473116  | 51473517  | HERVHF_5LTR    | - |
| Hylobates_lar_LG02 | 51474083  | 51475906  | HERVHF_pol     | - |
| Hylobates_lar_LG02 | 51475499  | 51476083  | HERVHF_pro     | - |
| Hylobates_lar_LG02 | 51478207  | 51478608  | HERVHF_3LTR    | - |
| Hylobates_lar_LG02 | 63783625  | 63784032  | HERVHF_5LTR    | + |
| Hylobates_lar_LG02 | 63786263  | 63786724  | HERVHF_pro     | + |
| Hylobates_lar_LG02 | 63786594  | 63788700  | HERVHF_pol     | + |
| Hylobates_lar_LG02 | 63789148  | 63789554  | HERVHF_3LTR    | + |
| Hylobates_lar_LG02 | 71306090  | 71306550  | HERVHF_5LTR    | - |
| Hylobates_lar_LG02 | 71306568  | 71306929  | HERVHF_env     | - |
| Hylobates_lar_LG02 | 71307169  | 71308953  | HERVHF_pol     | - |
| Hylobates_lar_LG02 | 71309358  | 71309678  | HERVHF_gag     | - |
| Hylobates_lar_LG02 | 71311312  | 71311772  | HERVHF_3LTR    | - |
| Hylobates_lar_LG02 | 85866533  | 85866947  | HERVHF_5LTR    | + |
| Hylobates_lar_LG02 | 85868685  | 85869005  | HERVHF_gag     | + |
| Hylobates_lar_LG02 | 85869041  | 85869856  | HERVHF_pro     | + |
| Hylobates_lar_LG02 | 85869431  | 85871648  | HERVHF_pol     | + |
| Hylobates_lar_LG02 | 85872594  | 85873012  | HERVHF_3LTR    | + |
| Hylobates_lar_LG02 | 145693977 | 145694430 | HERVHF_5LTR    | + |
| Hylobates_lar_LG02 | 145695929 | 145696426 | HERVHF_gag     | + |
| Hylobates_lar_LG02 | 145696867 | 145698674 | HERVHF_pol     | + |
| Hylobates_lar_LG02 | 145699266 | 145699719 | HERVHF_3LTR    | + |
| Hylobates_lar_LG02 | 177856038 | 177856774 | HERVHF_5LTR    | + |
| Hylobates_lar_LG02 | 177857753 | 177858166 | HERVHF_gag     | + |
| Hylobates_lar_LG02 | 177858219 | 177858995 | HERVHF_pro     | + |
| Hylobates_lar_LG02 | 177858453 | 177859169 | HERVHF_pol     | + |
| Hylobates_lar_LG02 | 177859607 | 177860344 | HERVHF_3LTR    | + |
| Hylobates_lar_LG03 | 26827389  | 26827809  | HERVIPADP_5LTR | - |

|                    |           |           |                |   |
|--------------------|-----------|-----------|----------------|---|
| Hylobates_lar_LG03 | 26827916  | 26828371  | HERVIPADP_env  | - |
| Hylobates_lar_LG03 | 26829862  | 26833128  | HERVIPADP_pol  | - |
| Hylobates_lar_LG03 | 26833653  | 26834054  | HERVIPADP_gag  | - |
| Hylobates_lar_LG03 | 26835954  | 26836377  | HERVIPADP_3LTR | - |
| Hylobates_lar_LG03 | 28198303  | 28198677  | HERVIPADP_5LTR | + |
| Hylobates_lar_LG03 | 28201395  | 28204574  | HERVIPADP_pol  | + |
| Hylobates_lar_LG03 | 28205450  | 28205941  | HERVIPADP_env  | + |
| Hylobates_lar_LG03 | 28206598  | 28206994  | HERVIPADP_3LTR | + |
| Hylobates_lar_LG03 | 44751704  | 44752109  | HERVHF_5LTR    | - |
| Hylobates_lar_LG03 | 44752339  | 44753057  | HERVHF_env     | - |
| Hylobates_lar_LG03 | 44754240  | 44755440  | HERVHF_pol     | - |
| Hylobates_lar_LG03 | 44754919  | 44755773  | HERVHF_pro     | - |
| Hylobates_lar_LG03 | 44755891  | 44756217  | HERVHF_gag     | - |
| Hylobates_lar_LG03 | 44757706  | 44758110  | HERVHF_3LTR    | - |
| Hylobates_lar_LG03 | 138127328 | 138127743 | HERVHF_5LTR    | + |
| Hylobates_lar_LG03 | 138128551 | 138128970 | HERVHF_gag     | + |
| Hylobates_lar_LG03 | 138129461 | 138130213 | HERVHF_pro     | + |
| Hylobates_lar_LG03 | 138129701 | 138131633 | HERVHF_pol     | + |
| Hylobates_lar_LG03 | 138132209 | 138132623 | HERVHF_3LTR    | + |
| Hylobates_lar_LG03 | 155209346 | 155209757 | HERVHF_5LTR    | - |
| Hylobates_lar_LG03 | 155210808 | 155213992 | HERVHF_pol     | - |
| Hylobates_lar_LG03 | 155214299 | 155214739 | HERVHF_gag     | - |
| Hylobates_lar_LG03 | 155216392 | 155216804 | HERVHF_3LTR    | - |
| Hylobates_lar_LG03 | 158489220 | 158489633 | HERVHF_5LTR    | - |
| Hylobates_lar_LG03 | 158490277 | 158492190 | HERVHF_pol     | - |
| Hylobates_lar_LG03 | 158491615 | 158492385 | HERVHF_pro     | - |
| Hylobates_lar_LG03 | 158492462 | 158492974 | HERVHF_gag     | - |
| Hylobates_lar_LG03 | 158494538 | 158494954 | HERVHF_3LTR    | - |
| Hylobates_lar_LG03 | 163302661 | 163303076 | HERVHF_5LTR    | - |
| Hylobates_lar_LG03 | 163303662 | 163305432 | HERVHF_pol     | - |
| Hylobates_lar_LG03 | 163307990 | 163308403 | HERVHF_3LTR    | - |
| Hylobates_lar_LG03 | 163559167 | 163559576 | HERVHF_5LTR    | - |
| Hylobates_lar_LG03 | 163560162 | 163561877 | HERVHF_pol     | - |
| Hylobates_lar_LG03 | 163561509 | 163562390 | HERVHF_pro     | - |
| Hylobates_lar_LG03 | 163562432 | 163562806 | HERVHF_gag     | - |
| Hylobates_lar_LG03 | 163564418 | 163564832 | HERVHF_3LTR    | - |
| Hylobates_lar_LG03 | 176837019 | 176837428 | HERVHF_5LTR    | - |
| Hylobates_lar_LG03 | 176837937 | 176840018 | HERVHF_pol     | - |
| Hylobates_lar_LG03 | 176839380 | 176840132 | HERVHF_pro     | - |
| Hylobates_lar_LG03 | 176840211 | 176840534 | HERVHF_gag     | - |
| Hylobates_lar_LG03 | 176842252 | 176842649 | HERVHF_3LTR    | - |
| Hylobates_lar_LG04 | 6326972   | 6327523   | HERVHF_5LTR    | + |
| Hylobates_lar_LG04 | 6332529   | 6334620   | HERVHF_pol     | + |
| Hylobates_lar_LG04 | 6339607   | 6340170   | HERVHF_3LTR    | + |

|                    |           |           |             |   |
|--------------------|-----------|-----------|-------------|---|
| Hylobates_lar_LG04 | 6384778   | 6385251   | HERVHF_5LTR | + |
| Hylobates_lar_LG04 | 6386994   | 6387494   | HERVHF_gag  | + |
| Hylobates_lar_LG04 | 6387852   | 6388373   | HERVHF_pro  | + |
| Hylobates_lar_LG04 | 6387966   | 6389921   | HERVHF_pol  | + |
| Hylobates_lar_LG04 | 6390307   | 6390788   | HERVHF_3LTR | + |
| Hylobates_lar_LG04 | 13565554  | 13565967  | HERVHF_5LTR | - |
| Hylobates_lar_LG04 | 13566421  | 13569952  | HERVHF_pol  | - |
| Hylobates_lar_LG04 | 13569545  | 13570126  | HERVHF_pro  | - |
| Hylobates_lar_LG04 | 13570406  | 13570813  | HERVHF_gag  | - |
| Hylobates_lar_LG04 | 13572328  | 13572743  | HERVHF_3LTR | - |
| Hylobates_lar_LG04 | 26177053  | 26177466  | HERVHF_5LTR | - |
| Hylobates_lar_LG04 | 26178057  | 26179875  | HERVHF_pol  | - |
| Hylobates_lar_LG04 | 26179695  | 26180189  | HERVHF_pro  | - |
| Hylobates_lar_LG04 | 26180407  | 26180706  | HERVHF_gag  | - |
| Hylobates_lar_LG04 | 26182427  | 26182841  | HERVHF_3LTR | - |
| Hylobates_lar_LG04 | 27939100  | 27939531  | HERVHF_5LTR | + |
| Hylobates_lar_LG04 | 27941114  | 27941419  | HERVHF_gag  | + |
| Hylobates_lar_LG04 | 27942147  | 27943677  | HERVHF_pol  | + |
| Hylobates_lar_LG04 | 27944335  | 27944771  | HERVHF_3LTR | + |
| Hylobates_lar_LG04 | 111353628 | 111354041 | HERVHF_5LTR | + |
| Hylobates_lar_LG04 | 111355672 | 111356097 | HERVHF_gag  | + |
| Hylobates_lar_LG04 | 111356506 | 111358787 | HERVHF_pol  | + |
| Hylobates_lar_LG04 | 111359203 | 111359614 | HERVHF_3LTR | + |
| Hylobates_lar_LG04 | 129164563 | 129164988 | HERVHF_5LTR | + |
| Hylobates_lar_LG04 | 129165874 | 129167117 | HERVHF_gag  | + |
| Hylobates_lar_LG04 | 129167175 | 129167573 | HERVHF_pro  | + |
| Hylobates_lar_LG04 | 129167644 | 129168579 | HERVHF_pol  | + |
| Hylobates_lar_LG04 | 129169021 | 129169449 | HERVHF_3LTR | + |
| Hylobates_lar_LG04 | 133443945 | 133444289 | HERVHF_5LTR | - |
| Hylobates_lar_LG04 | 133444796 | 133446739 | HERVHF_pol  | - |
| Hylobates_lar_LG04 | 133447163 | 133447585 | HERVHF_gag  | - |
| Hylobates_lar_LG04 | 133449196 | 133449547 | HERVHF_3LTR | - |
| Hylobates_lar_LG04 | 137269096 | 137269444 | HERVHF_5LTR | - |
| Hylobates_lar_LG04 | 137269854 | 137272016 | HERVHF_pol  | - |
| Hylobates_lar_LG04 | 137272300 | 137272689 | HERVHF_gag  | - |
| Hylobates_lar_LG04 | 137274236 | 137274588 | HERVHF_3LTR | - |
| Hylobates_lar_LG04 | 173411111 | 173411515 | HERVHF_5LTR | + |
| Hylobates_lar_LG04 | 173413852 | 173414394 | HERVHF_pro  | + |
| Hylobates_lar_LG04 | 173413891 | 173415963 | HERVHF_pol  | + |
| Hylobates_lar_LG04 | 173416410 | 173416802 | HERVHF_3LTR | + |
| Hylobates_lar_LG05 | 14609709  | 14610162  | HERVHF_5LTR | + |
| Hylobates_lar_LG05 | 14612293  | 14612946  | HERVHF_pro  | + |
| Hylobates_lar_LG05 | 14612498  | 14614414  | HERVHF_pol  | + |
| Hylobates_lar_LG05 | 14614867  | 14615317  | HERVHF_3LTR | + |

|                    |           |           |             |   |
|--------------------|-----------|-----------|-------------|---|
| Hylobates_lar_LG05 | 15801625  | 15802017  | HERVHF_5LTR | - |
| Hylobates_lar_LG05 | 15803130  | 15804722  | HERVHF_pol  | - |
| Hylobates_lar_LG05 | 15804351  | 15805130  | HERVHF_pro  | - |
| Hylobates_lar_LG05 | 15805218  | 15805529  | HERVHF_gag  | - |
| Hylobates_lar_LG05 | 15807234  | 15807630  | HERVHF_3LTR | - |
| Hylobates_lar_LG05 | 23752341  | 23752690  | HERVHF_5LTR | - |
| Hylobates_lar_LG05 | 23753259  | 23755074  | HERVHF_pol  | - |
| Hylobates_lar_LG05 | 23754694  | 23755422  | HERVHF_pro  | - |
| Hylobates_lar_LG05 | 23755537  | 23756267  | HERVHF_gag  | - |
| Hylobates_lar_LG05 | 23757604  | 23757955  | HERVHF_3LTR | - |
| Hylobates_lar_LG05 | 28288476  | 28288785  | HERVHF_5LTR | - |
| Hylobates_lar_LG05 | 28289582  | 28291451  | HERVHF_pol  | - |
| Hylobates_lar_LG05 | 28291343  | 28291969  | HERVHF_pro  | - |
| Hylobates_lar_LG05 | 28292140  | 28292646  | HERVHF_gag  | - |
| Hylobates_lar_LG05 | 28292834  | 28293140  | HERVHF_3LTR | - |
| Hylobates_lar_LG05 | 32613289  | 32613736  | HERVHF_5LTR | - |
| Hylobates_lar_LG05 | 32614708  | 32617039  | HERVHF_pol  | - |
| Hylobates_lar_LG05 | 32617398  | 32617865  | HERVHF_gag  | - |
| Hylobates_lar_LG05 | 32619193  | 32619639  | HERVHF_3LTR | - |
| Hylobates_lar_LG05 | 81465795  | 81466219  | HERVK_5LTR  | + |
| Hylobates_lar_LG05 | 81468859  | 81469839  | HERVK_pro   | + |
| Hylobates_lar_LG05 | 81469806  | 81472549  | HERVK_pol   | + |
| Hylobates_lar_LG05 | 81478941  | 81479357  | HERVK_3LTR  | + |
| Hylobates_lar_LG05 | 115275938 | 115276341 | HERVHF_5LTR | + |
| Hylobates_lar_LG05 | 115278830 | 115279684 | HERVHF_pro  | + |
| Hylobates_lar_LG05 | 115279565 | 115282750 | HERVHF_pol  | + |
| Hylobates_lar_LG05 | 115283339 | 115283743 | HERVHF_3LTR | + |
| Hylobates_lar_LG05 | 119559476 | 119559924 | HERVHF_5LTR | + |
| Hylobates_lar_LG05 | 119561753 | 119562577 | HERVHF_pro  | + |
| Hylobates_lar_LG05 | 119561978 | 119564277 | HERVHF_pol  | + |
| Hylobates_lar_LG05 | 119565318 | 119565766 | HERVHF_3LTR | + |
| Hylobates_lar_LG05 | 141886424 | 141886874 | HERVHF_5LTR | - |
| Hylobates_lar_LG05 | 141887002 | 141887850 | HERVHF_env  | - |
| Hylobates_lar_LG05 | 141889547 | 141894244 | HERVHF_pol  | - |
| Hylobates_lar_LG05 | 141897583 | 141898035 | HERVHF_3LTR | - |
| Hylobates_lar_LG06 | 36049931  | 36050527  | HERVHF_5LTR | - |
| Hylobates_lar_LG06 | 36052175  | 36053329  | HERVHF_env  | - |
| Hylobates_lar_LG06 | 36054845  | 36056661  | HERVHF_pol  | - |
| Hylobates_lar_LG06 | 36057534  | 36058133  | HERVHF_3LTR | - |
| Hylobates_lar_LG06 | 38831518  | 38831828  | HERVHF_5LTR | + |
| Hylobates_lar_LG06 | 38833322  | 38833663  | HERVHF_gag  | + |
| Hylobates_lar_LG06 | 38834072  | 38837056  | HERVHF_pol  | + |
| Hylobates_lar_LG06 | 38837745  | 38838060  | HERVHF_3LTR | + |
| Hylobates_lar_LG06 | 64123185  | 64123588  | HERVHF_5LTR | - |

|                    |           |           |               |   |
|--------------------|-----------|-----------|---------------|---|
| Hylobates_lar_LG06 | 64124006  | 64126193  | HERVHF_pol    | - |
| Hylobates_lar_LG06 | 64126620  | 64126940  | HERVHF_gag    | - |
| Hylobates_lar_LG06 | 64128645  | 64129049  | HERVHF_3LTR   | - |
| Hylobates_lar_LG07 | 21098754  | 21099589  | HERVHF_5LTR   | + |
| Hylobates_lar_LG07 | 21100064  | 21102380  | HERVHF_pol    | + |
| Hylobates_lar_LG07 | 21103353  | 21104191  | HERVHF_3LTR   | + |
| Hylobates_lar_LG07 | 27547945  | 27548270  | HERVHF_5LTR   | + |
| Hylobates_lar_LG07 | 27550536  | 27551479  | HERVHF_pol    | + |
| Hylobates_lar_LG07 | 27552457  | 27553392  | HERVHF_env    | + |
| Hylobates_lar_LG07 | 27553688  | 27554027  | HERVHF_3LTR   | + |
| Hylobates_lar_LG07 | 46243819  | 46244265  | HSERVIII_5LTR | + |
| Hylobates_lar_LG07 | 46247684  | 46248421  | HSERVIII_pol  | + |
| Hylobates_lar_LG07 | 46250042  | 46250493  | HSERVIII_3LTR | + |
| Hylobates_lar_LG07 | 53204409  | 53204833  | HERVHF_5LTR   | + |
| Hylobates_lar_LG07 | 53206223  | 53206594  | HERVHF_gag    | + |
| Hylobates_lar_LG07 | 53207090  | 53210700  | HERVHF_pol    | + |
| Hylobates_lar_LG07 | 53210906  | 53211268  | HERVHF_env    | + |
| Hylobates_lar_LG07 | 53211437  | 53211878  | HERVHF_3LTR   | + |
| Hylobates_lar_LG07 | 69447739  | 69448136  | HERVHF_5LTR   | + |
| Hylobates_lar_LG07 | 69449949  | 69450317  | HERVHF_gag    | + |
| Hylobates_lar_LG07 | 69450368  | 69451219  | HERVHF_pro    | + |
| Hylobates_lar_LG07 | 69450656  | 69452653  | HERVHF_pol    | + |
| Hylobates_lar_LG07 | 69453186  | 69453599  | HERVHF_3LTR   | + |
| Hylobates_lar_LG07 | 76861595  | 76862098  | HERVHF_5LTR   | - |
| Hylobates_lar_LG07 | 76862324  | 76863434  | HERVHF_env    | - |
| Hylobates_lar_LG07 | 76864308  | 76867082  | HERVHF_pol    | - |
| Hylobates_lar_LG07 | 76867440  | 76867757  | HERVHF_gag    | - |
| Hylobates_lar_LG07 | 76869005  | 76869510  | HERVHF_3LTR   | - |
| Hylobates_lar_LG07 | 125048676 | 125048991 | HERVHF_5LTR   | + |
| Hylobates_lar_LG07 | 125050478 | 125050777 | HERVHF_gag    | + |
| Hylobates_lar_LG07 | 125050767 | 125051216 | HERVHF_pro    | + |
| Hylobates_lar_LG07 | 125051111 | 125053218 | HERVHF_pol    | + |
| Hylobates_lar_LG07 | 125053948 | 125054310 | HERVHF_env    | + |
| Hylobates_lar_LG07 | 125054536 | 125054854 | HERVHF_3LTR   | + |
| Hylobates_lar_LG07 | 130700840 | 130701272 | HERVHF_5LTR   | - |
| Hylobates_lar_LG07 | 130701680 | 130703777 | HERVHF_pol    | - |
| Hylobates_lar_LG07 | 130703235 | 130704008 | HERVHF_pro    | - |
| Hylobates_lar_LG07 | 130704142 | 130704465 | HERVHF_gag    | - |
| Hylobates_lar_LG07 | 130705980 | 130706410 | HERVHF_3LTR   | - |
| Hylobates_lar_LG08 | 11545787  | 11546265  | HERVHF_5LTR   | - |
| Hylobates_lar_LG08 | 11547019  | 11548779  | HERVHF_pol    | - |
| Hylobates_lar_LG08 | 11548189  | 11548770  | HERVHF_pro    | - |
| Hylobates_lar_LG08 | 11548990  | 11549421  | HERVHF_gag    | - |
| Hylobates_lar_LG08 | 11551057  | 11551534  | HERVHF_3LTR   | - |

|                    |           |           |                |   |
|--------------------|-----------|-----------|----------------|---|
| Hylobates_lar_LG08 | 60495252  | 60495571  | HERVHF_5LTR    | + |
| Hylobates_lar_LG08 | 60498225  | 60498929  | HERVHF_pro     | + |
| Hylobates_lar_LG08 | 60498678  | 60499996  | HERVHF_pol     | + |
| Hylobates_lar_LG08 | 60501413  | 60501723  | HERVHF_3LTR    | + |
| Hylobates_lar_LG08 | 89631815  | 89632223  | HERVK_5LTR     | + |
| Hylobates_lar_LG08 | 89633645  | 89634567  | HERVK_pro      | + |
| Hylobates_lar_LG08 | 89634462  | 89636387  | HERVK_pol      | + |
| Hylobates_lar_LG08 | 89637426  | 89637833  | HERVK_3LTR     | + |
| Hylobates_lar_LG08 | 96760303  | 96760714  | HERVHF_5LTR    | + |
| Hylobates_lar_LG08 | 96762321  | 96762782  | HERVHF_gag     | + |
| Hylobates_lar_LG08 | 96763225  | 96765204  | HERVHF_pol     | + |
| Hylobates_lar_LG08 | 96766571  | 96766982  | HERVHF_3LTR    | + |
| Hylobates_lar_LG08 | 116578799 | 116579236 | HERVHF_5LTR    | + |
| Hylobates_lar_LG08 | 116580945 | 116581253 | HERVHF_gag     | + |
| Hylobates_lar_LG08 | 116581348 | 116582097 | HERVHF_pro     | + |
| Hylobates_lar_LG08 | 116581537 | 116583340 | HERVHF_pol     | + |
| Hylobates_lar_LG08 | 116584584 | 116585007 | HERVHF_3LTR    | + |
| Hylobates_lar_LG08 | 120078823 | 120079574 | HERVK_5LTR     | + |
| Hylobates_lar_LG08 | 120081310 | 120081693 | HERVK_gag      | + |
| Hylobates_lar_LG08 | 120081630 | 120082585 | HERVK_pro      | + |
| Hylobates_lar_LG08 | 120082564 | 120087006 | HERVK_pol      | + |
| Hylobates_lar_LG08 | 120087475 | 120088218 | HERVK_3LTR     | + |
| Hylobates_lar_LG08 | 125538840 | 125539291 | HERVHF_5LTR    | - |
| Hylobates_lar_LG08 | 125539704 | 125541841 | HERVHF_pol     | - |
| Hylobates_lar_LG08 | 125541242 | 125541907 | HERVHF_pro     | - |
| Hylobates_lar_LG08 | 125542101 | 125542424 | HERVHF_gag     | - |
| Hylobates_lar_LG08 | 125544237 | 125544689 | HERVHF_3LTR    | - |
| Hylobates_lar_LG08 | 125777738 | 125778193 | HERVHF_5LTR    | - |
| Hylobates_lar_LG08 | 125778316 | 125778623 | HERVHF_env     | - |
| Hylobates_lar_LG08 | 125779232 | 125781328 | HERVHF_pol     | - |
| Hylobates_lar_LG08 | 125780711 | 125781454 | HERVHF_pro     | - |
| Hylobates_lar_LG08 | 125781558 | 125781941 | HERVHF_gag     | - |
| Hylobates_lar_LG08 | 125783483 | 125783936 | HERVHF_3LTR    | - |
| Hylobates_lar_LG08 | 128737307 | 128737715 | HERVHF_5LTR    | + |
| Hylobates_lar_LG08 | 128739296 | 128739622 | HERVHF_gag     | + |
| Hylobates_lar_LG08 | 128739815 | 128740564 | HERVHF_pro     | + |
| Hylobates_lar_LG08 | 128740022 | 128742134 | HERVHF_pol     | + |
| Hylobates_lar_LG08 | 128743136 | 128743541 | HERVHF_3LTR    | + |
| Hylobates_lar_LG08 | 131511032 | 131511462 | HERVHF_5LTR    | - |
| Hylobates_lar_LG08 | 131512431 | 131514541 | HERVHF_pol     | - |
| Hylobates_lar_LG08 | 131514029 | 131514571 | HERVHF_pro     | - |
| Hylobates_lar_LG08 | 131515888 | 131516313 | HERVHF_gag     | - |
| Hylobates_lar_LG08 | 131523408 | 131523835 | HERVHF_3LTR    | - |
| Hylobates_lar_LG09 | 52597434  | 52597904  | HERVIPADP_5LTR | - |



|                    |           |           |                |   |
|--------------------|-----------|-----------|----------------|---|
| Hylobates_lar_LG09 | 52601197  | 52603789  | HERVIPADP_pol  | - |
| Hylobates_lar_LG09 | 52608210  | 52608688  | HERVIPADP_3LTR | - |
| Hylobates_lar_LG09 | 75671665  | 75672181  | HERVK_5LTR     | + |
| Hylobates_lar_LG09 | 75672689  | 75673650  | HERVK_gag      | + |
| Hylobates_lar_LG09 | 75673894  | 75674340  | HERVK_pro      | + |
| Hylobates_lar_LG09 | 75674579  | 75676357  | HERVK_pol      | + |
| Hylobates_lar_LG09 | 75676858  | 75677196  | HERVK_env      | + |
| Hylobates_lar_LG09 | 75677267  | 75677782  | HERVK_3LTR     | + |
| Hylobates_lar_LG09 | 95717041  | 95717472  | HERVHF_5LTR    | + |
| Hylobates_lar_LG09 | 95718755  | 95719075  | HERVHF_gag     | + |
| Hylobates_lar_LG09 | 95719133  | 95719930  | HERVHF_pro     | + |
| Hylobates_lar_LG09 | 95719367  | 95721243  | HERVHF_pol     | + |
| Hylobates_lar_LG09 | 95722136  | 95722571  | HERVHF_3LTR    | + |
| Hylobates_lar_LG09 | 112447122 | 112447534 | HERVHF_5LTR    | + |
| Hylobates_lar_LG09 | 112449184 | 112449567 | HERVHF_gag     | + |
| Hylobates_lar_LG09 | 112449835 | 112450383 | HERVHF_pro     | + |
| Hylobates_lar_LG09 | 112450006 | 112451940 | HERVHF_pol     | + |
| Hylobates_lar_LG09 | 112452391 | 112452802 | HERVHF_3LTR    | + |
| Hylobates_lar_LG10 | 16670763  | 16671150  | HERVHF_5LTR    | - |
| Hylobates_lar_LG10 | 16671791  | 16673728  | HERVHF_pol     | - |
| Hylobates_lar_LG10 | 16673219  | 16673941  | HERVHF_pro     | - |
| Hylobates_lar_LG10 | 16676069  | 16676447  | HERVHF_3LTR    | - |
| Hylobates_lar_LG10 | 21036537  | 21036944  | HERVHF_5LTR    | - |
| Hylobates_lar_LG10 | 21037367  | 21039253  | HERVHF_pol     | - |
| Hylobates_lar_LG10 | 21039204  | 21039752  | HERVHF_pro     | - |
| Hylobates_lar_LG10 | 21041822  | 21042233  | HERVHF_3LTR    | - |
| Hylobates_lar_LG10 | 43326438  | 43326802  | HERVHF_5LTR    | - |
| Hylobates_lar_LG10 | 43327422  | 43329350  | HERVHF_pol     | - |
| Hylobates_lar_LG10 | 43328775  | 43329350  | HERVHF_pro     | - |
| Hylobates_lar_LG10 | 43329612  | 43330022  | HERVHF_gag     | - |
| Hylobates_lar_LG10 | 43331720  | 43332089  | HERVHF_3LTR    | - |
| Hylobates_lar_LG10 | 61679942  | 61680243  | HERVHF_5LTR    | - |
| Hylobates_lar_LG10 | 61681343  | 61683559  | HERVHF_pol     | - |
| Hylobates_lar_LG10 | 61683427  | 61683870  | HERVHF_pro     | - |
| Hylobates_lar_LG10 | 61685442  | 61685743  | HERVHF_3LTR    | - |
| Hylobates_lar_LG10 | 64538442  | 64538844  | HERVHF_5LTR    | + |
| Hylobates_lar_LG10 | 64540064  | 64540393  | HERVHF_gag     | + |
| Hylobates_lar_LG10 | 64540631  | 64541494  | HERVHF_pro     | + |
| Hylobates_lar_LG10 | 64540973  | 64543053  | HERVHF_pol     | + |
| Hylobates_lar_LG10 | 64543454  | 64543860  | HERVHF_3LTR    | + |
| Hylobates_lar_LG11 | 15215377  | 15215974  | HERVHF_5LTR    | - |
| Hylobates_lar_LG11 | 15216147  | 15218330  | HERVHF_pol     | - |
| Hylobates_lar_LG11 | 15217815  | 15218561  | HERVHF_pro     | - |
| Hylobates_lar_LG11 | 15219695  | 15220302  | HERVHF_3LTR    | - |

|                    |           |           |             |   |
|--------------------|-----------|-----------|-------------|---|
| Hylobates_lar_LG11 | 40022159  | 40022573  | HERVHF_5LTR | + |
| Hylobates_lar_LG11 | 40024630  | 40024965  | HERVHF_pro  | + |
| Hylobates_lar_LG11 | 40025070  | 40027196  | HERVHF_pol  | + |
| Hylobates_lar_LG11 | 40027648  | 40028056  | HERVHF_3LTR | + |
| Hylobates_lar_LG11 | 40971565  | 40972002  | HERVHF_5LTR | - |
| Hylobates_lar_LG11 | 40972245  | 40973107  | HERVHF_env  | - |
| Hylobates_lar_LG11 | 40974421  | 40976913  | HERVHF_pol  | - |
| Hylobates_lar_LG11 | 40979377  | 40979809  | HERVHF_3LTR | - |
| Hylobates_lar_LG11 | 47045116  | 47045448  | HERVHF_5LTR | - |
| Hylobates_lar_LG11 | 47045931  | 47049251  | HERVHF_pol  | - |
| Hylobates_lar_LG11 | 47048619  | 47049251  | HERVHF_pro  | - |
| Hylobates_lar_LG11 | 47049499  | 47049888  | HERVHF_gag  | - |
| Hylobates_lar_LG11 | 47051338  | 47051675  | HERVHF_3LTR | - |
| Hylobates_lar_LG11 | 53438183  | 53438574  | HERVHF_5LTR | - |
| Hylobates_lar_LG11 | 53438807  | 53439596  | HERVHF_env  | - |
| Hylobates_lar_LG11 | 53440423  | 53441564  | HERVHF_pol  | - |
| Hylobates_lar_LG11 | 53441561  | 53441986  | HERVHF_pro  | - |
| Hylobates_lar_LG11 | 53442069  | 53442380  | HERVHF_gag  | - |
| Hylobates_lar_LG11 | 53444128  | 53444507  | HERVHF_3LTR | - |
| Hylobates_lar_LG11 | 58455472  | 58455932  | HERVHF_5LTR | - |
| Hylobates_lar_LG11 | 58456387  | 58458485  | HERVHF_pol  | - |
| Hylobates_lar_LG11 | 58458033  | 58458728  | HERVHF_pro  | - |
| Hylobates_lar_LG11 | 58458738  | 58459064  | HERVHF_gag  | - |
| Hylobates_lar_LG11 | 58460613  | 58461084  | HERVHF_3LTR | - |
| Hylobates_lar_LG11 | 72024100  | 72025095  | HERVHF_5LTR | - |
| Hylobates_lar_LG11 | 72025995  | 72026753  | HERVHF_pol  | - |
| Hylobates_lar_LG11 | 72026148  | 72026942  | HERVHF_pro  | - |
| Hylobates_lar_LG11 | 72027642  | 72028638  | HERVHF_3LTR | - |
| Hylobates_lar_LG11 | 92145503  | 92145803  | HERVHF_5LTR | - |
| Hylobates_lar_LG11 | 92145503  | 92145803  | HERVHF_5LTR | - |
| Hylobates_lar_LG11 | 92147130  | 92148451  | HERVHF_pol  | - |
| Hylobates_lar_LG11 | 92150879  | 92152941  | HERVHF_pol  | + |
| Hylobates_lar_LG11 | 92159268  | 92159581  | HERVHF_3LTR | + |
| Hylobates_lar_LG11 | 92159268  | 92159581  | HERVHF_3LTR | + |
| Hylobates_lar_LG11 | 96908094  | 96908534  | HERVHF_5LTR | - |
| Hylobates_lar_LG11 | 96908997  | 96912051  | HERVHF_pol  | - |
| Hylobates_lar_LG11 | 96912357  | 96912767  | HERVHF_gag  | - |
| Hylobates_lar_LG11 | 96914317  | 96914742  | HERVHF_3LTR | - |
| Hylobates_lar_LG11 | 102156968 | 102157308 | HERVHF_5LTR | - |
| Hylobates_lar_LG11 | 102157730 | 102159557 | HERVHF_pol  | - |
| Hylobates_lar_LG11 | 102159243 | 102159962 | HERVHF_pro  | - |
| Hylobates_lar_LG11 | 102162020 | 102162371 | HERVHF_3LTR | - |
| Hylobates_lar_LG11 | 110189578 | 110189891 | HERVHF_5LTR | - |
| Hylobates_lar_LG11 | 110192272 | 110193033 | HERVHF_pol  | - |

|                    |           |           |             |   |
|--------------------|-----------|-----------|-------------|---|
| Hylobates_lar_LG11 | 110194196 | 110194660 | HERVHF_gag  | - |
| Hylobates_lar_LG11 | 110195315 | 110195626 | HERVHF_3LTR | - |
| Hylobates_lar_LG12 | 10110069  | 10110479  | HERVHF_5LTR | - |
| Hylobates_lar_LG12 | 10112774  | 10114579  | HERVHF_pol  | - |
| Hylobates_lar_LG12 | 10116384  | 10116734  | HERVHF_gag  | - |
| Hylobates_lar_LG12 | 10117222  | 10117620  | HERVHF_3LTR | - |
| Hylobates_lar_LG12 | 13345419  | 13345884  | HERVHF_5LTR | - |
| Hylobates_lar_LG12 | 13346053  | 13347214  | HERVHF_env  | - |
| Hylobates_lar_LG12 | 13348939  | 13351178  | HERVHF_pol  | - |
| Hylobates_lar_LG12 | 13352066  | 13352428  | HERVHF_gag  | - |
| Hylobates_lar_LG12 | 13354033  | 13354486  | HERVHF_3LTR | - |
| Hylobates_lar_LG12 | 18230292  | 18230705  | HERVHF_5LTR | - |
| Hylobates_lar_LG12 | 18231159  | 18233196  | HERVHF_pol  | - |
| Hylobates_lar_LG12 | 18232675  | 18233556  | HERVHF_pro  | - |
| Hylobates_lar_LG12 | 18235492  | 18235906  | HERVHF_3LTR | - |
| Hylobates_lar_LG12 | 55320627  | 55320953  | HERVHF_5LTR | + |
| Hylobates_lar_LG12 | 55321786  | 55322112  | HERVHF_gag  | + |
| Hylobates_lar_LG12 | 55322229  | 55322780  | HERVHF_pro  | + |
| Hylobates_lar_LG12 | 55322633  | 55325313  | HERVHF_pol  | + |
| Hylobates_lar_LG12 | 55325892  | 55326215  | HERVHF_3LTR | + |
| Hylobates_lar_LG12 | 55436183  | 55436505  | HERVHF_5LTR | + |
| Hylobates_lar_LG12 | 55441298  | 55441645  | HERVHF_gag  | + |
| Hylobates_lar_LG12 | 55441740  | 55442558  | HERVHF_pro  | + |
| Hylobates_lar_LG12 | 55441977  | 55444131  | HERVHF_pol  | + |
| Hylobates_lar_LG12 | 55445611  | 55445918  | HERVHF_3LTR | + |
| Hylobates_lar_LG12 | 56854725  | 56855080  | HERVHF_5LTR | - |
| Hylobates_lar_LG12 | 56856567  | 56857911  | HERVHF_pol  | - |
| Hylobates_lar_LG12 | 56857357  | 56857986  | HERVHF_pro  | - |
| Hylobates_lar_LG12 | 56860102  | 56860440  | HERVHF_3LTR | - |
| Hylobates_lar_LG12 | 69220852  | 69221266  | HERVHF_5LTR | - |
| Hylobates_lar_LG12 | 69221851  | 69223886  | HERVHF_pol  | - |
| Hylobates_lar_LG12 | 69223269  | 69223997  | HERVHF_pro  | - |
| Hylobates_lar_LG12 | 69224149  | 69224520  | HERVHF_gag  | - |
| Hylobates_lar_LG12 | 69226231  | 69226645  | HERVHF_3LTR | - |
| Hylobates_lar_LG12 | 70572684  | 70572995  | HERVHF_5LTR | + |
| Hylobates_lar_LG12 | 70574566  | 70574907  | HERVHF_gag  | + |
| Hylobates_lar_LG12 | 70575052  | 70575858  | HERVHF_pro  | + |
| Hylobates_lar_LG12 | 70575295  | 70577530  | HERVHF_pol  | + |
| Hylobates_lar_LG12 | 70577980  | 70578300  | HERVHF_3LTR | + |
| Hylobates_lar_LG13 | 37374131  | 37374493  | HERVK_5LTR  | + |
| Hylobates_lar_LG13 | 37375377  | 37375847  | HERVK_gag   | + |
| Hylobates_lar_LG13 | 37375919  | 37376230  | HERVK_pro   | + |
| Hylobates_lar_LG13 | 37376649  | 37378903  | HERVK_pol   | + |
| Hylobates_lar_LG13 | 37378911  | 37379274  | HERVK_3LTR  | + |

|                    |           |           |             |   |
|--------------------|-----------|-----------|-------------|---|
| Hylobates_lar_LG13 | 38704974  | 38705280  | HERVHF_5LTR | - |
| Hylobates_lar_LG13 | 38706420  | 38708789  | HERVHF_pol  | - |
| Hylobates_lar_LG13 | 38708136  | 38708990  | HERVHF_pro  | - |
| Hylobates_lar_LG13 | 38709028  | 38709399  | HERVHF_gag  | - |
| Hylobates_lar_LG13 | 38711064  | 38711370  | HERVHF_3LTR | - |
| Hylobates_lar_LG13 | 67375723  | 67376156  | HERVHF_5LTR | + |
| Hylobates_lar_LG13 | 67377836  | 67378249  | HERVHF_gag  | + |
| Hylobates_lar_LG13 | 67378283  | 67378729  | HERVHF_pro  | + |
| Hylobates_lar_LG13 | 67378729  | 67380620  | HERVHF_pol  | + |
| Hylobates_lar_LG13 | 67381384  | 67381815  | HERVHF_3LTR | + |
| Hylobates_lar_LG13 | 70285602  | 70286015  | HERVHF_5LTR | - |
| Hylobates_lar_LG13 | 70286174  | 70286527  | HERVHF_env  | - |
| Hylobates_lar_LG13 | 70286911  | 70290346  | HERVHF_pol  | - |
| Hylobates_lar_LG13 | 70290785  | 70291183  | HERVHF_gag  | - |
| Hylobates_lar_LG13 | 70292480  | 70292890  | HERVHF_3LTR | - |
| Hylobates_lar_LG13 | 92627065  | 92627426  | HERVHF_5LTR | + |
| Hylobates_lar_LG13 | 92628586  | 92629053  | HERVHF_gag  | + |
| Hylobates_lar_LG13 | 92630091  | 92632297  | HERVHF_pol  | + |
| Hylobates_lar_LG13 | 92634488  | 92635291  | HERVHF_env  | + |
| Hylobates_lar_LG13 | 92635580  | 92635948  | HERVHF_3LTR | + |
| Hylobates_lar_LG13 | 106681956 | 106682293 | HERVHF_5LTR | + |
| Hylobates_lar_LG13 | 106683573 | 106684064 | HERVHF_gag  | + |
| Hylobates_lar_LG13 | 106684571 | 106685236 | HERVHF_pro  | + |
| Hylobates_lar_LG13 | 106684619 | 106686590 | HERVHF_pol  | + |
| Hylobates_lar_LG13 | 106687880 | 106688223 | HERVHF_3LTR | + |
| Hylobates_lar_LG14 | 2246248   | 2246731   | HERVHF_5LTR | - |
| Hylobates_lar_LG14 | 2247627   | 2248925   | HERVHF_pol  | - |
| Hylobates_lar_LG14 | 2248925   | 2249401   | HERVHF_pro  | - |
| Hylobates_lar_LG14 | 2249534   | 2249944   | HERVHF_gag  | - |
| Hylobates_lar_LG14 | 2260349   | 2260840   | HERVHF_3LTR | - |
| Hylobates_lar_LG14 | 9027142   | 9027554   | HERVHF_5LTR | + |
| Hylobates_lar_LG14 | 9030836   | 9031156   | HERVHF_gag  | + |
| Hylobates_lar_LG14 | 9031607   | 9033362   | HERVHF_pol  | + |
| Hylobates_lar_LG14 | 9034478   | 9034901   | HERVHF_3LTR | + |
| Hylobates_lar_LG14 | 16825624  | 16826020  | HERVHF_5LTR | - |
| Hylobates_lar_LG14 | 16826469  | 16828642  | HERVHF_pol  | - |
| Hylobates_lar_LG14 | 16830896  | 16831292  | HERVHF_3LTR | - |
| Hylobates_lar_LG14 | 29705688  | 29706095  | HERVHF_5LTR | - |
| Hylobates_lar_LG14 | 29706543  | 29708880  | HERVHF_pol  | - |
| Hylobates_lar_LG14 | 29711000  | 29711405  | HERVHF_3LTR | - |
| Hylobates_lar_LG14 | 33401399  | 33401791  | HERVHF_5LTR | - |
| Hylobates_lar_LG14 | 33401872  | 33402223  | HERVHF_env  | - |
| Hylobates_lar_LG14 | 33402748  | 33404067  | HERVHF_pol  | - |
| Hylobates_lar_LG14 | 33404066  | 33404455  | HERVHF_pro  | - |

|                    |           |           |             |   |
|--------------------|-----------|-----------|-------------|---|
| Hylobates_lar_LG14 | 33406638  | 33407032  | HERVHF_3LTR | - |
| Hylobates_lar_LG14 | 36203552  | 36203979  | HERVHF_5LTR | - |
| Hylobates_lar_LG14 | 36204384  | 36206457  | HERVHF_pol  | - |
| Hylobates_lar_LG14 | 36205915  | 36206553  | HERVHF_pro  | - |
| Hylobates_lar_LG14 | 36206771  | 36207291  | HERVHF_gag  | - |
| Hylobates_lar_LG14 | 36208786  | 36209216  | HERVHF_3LTR | - |
| Hylobates_lar_LG15 | 14023600  | 14024039  | HERVHF_5LTR | + |
| Hylobates_lar_LG15 | 14025744  | 14026043  | HERVHF_gag  | + |
| Hylobates_lar_LG15 | 14026088  | 14026678  | HERVHF_pro  | + |
| Hylobates_lar_LG15 | 14026280  | 14028200  | HERVHF_pol  | + |
| Hylobates_lar_LG15 | 14028850  | 14029280  | HERVHF_3LTR | + |
| Hylobates_lar_LG15 | 29446119  | 29446539  | HERVHF_5LTR | - |
| Hylobates_lar_LG15 | 29447290  | 29449670  | HERVHF_pol  | - |
| Hylobates_lar_LG15 | 29449781  | 29450329  | HERVHF_pro  | - |
| Hylobates_lar_LG15 | 29450686  | 29451129  | HERVHF_gag  | - |
| Hylobates_lar_LG15 | 29452490  | 29452912  | HERVHF_3LTR | - |
| Hylobates_lar_LG15 | 65578351  | 65578764  | HERVHF_5LTR | - |
| Hylobates_lar_LG15 | 65579172  | 65581145  | HERVHF_pol  | - |
| Hylobates_lar_LG15 | 65580768  | 65581319  | HERVHF_pro  | - |
| Hylobates_lar_LG15 | 65583951  | 65584356  | HERVHF_3LTR | - |
| Hylobates_lar_LG15 | 66832563  | 66832958  | HERVHF_5LTR | - |
| Hylobates_lar_LG15 | 66833369  | 66836128  | HERVHF_pol  | - |
| Hylobates_lar_LG15 | 66838355  | 66838759  | HERVHF_3LTR | - |
| Hylobates_lar_LG15 | 92682839  | 92683277  | HERVHF_5LTR | - |
| Hylobates_lar_LG15 | 92684103  | 92685792  | HERVHF_pol  | - |
| Hylobates_lar_LG15 | 92685250  | 92685831  | HERVHF_pro  | - |
| Hylobates_lar_LG15 | 92688077  | 92688519  | HERVHF_3LTR | - |
| Hylobates_lar_LG15 | 94653876  | 94654287  | HERVHF_5LTR | + |
| Hylobates_lar_LG15 | 94656178  | 94656624  | HERVHF_pro  | + |
| Hylobates_lar_LG15 | 94656348  | 94658487  | HERVHF_pol  | + |
| Hylobates_lar_LG15 | 94658901  | 94659313  | HERVHF_3LTR | + |
| Hylobates_lar_LG15 | 102172849 | 102173251 | HERVHF_5LTR | + |
| Hylobates_lar_LG15 | 102174992 | 102175585 | HERVHF_gag  | + |
| Hylobates_lar_LG15 | 102175601 | 102176425 | HERVHF_pro  | + |
| Hylobates_lar_LG15 | 102175883 | 102178879 | HERVHF_pol  | + |
| Hylobates_lar_LG15 | 102179281 | 102179688 | HERVHF_3LTR | + |
| Hylobates_lar_LG15 | 102721328 | 102721765 | HERVHF_5LTR | - |
| Hylobates_lar_LG15 | 102722204 | 102724279 | HERVHF_pol  | - |
| Hylobates_lar_LG15 | 102723746 | 102724588 | HERVHF_pro  | - |
| Hylobates_lar_LG15 | 102724581 | 102724991 | HERVHF_gag  | - |
| Hylobates_lar_LG15 | 102728396 | 102728834 | HERVHF_3LTR | - |
| Hylobates_lar_LG15 | 107635720 | 107636128 | HERVHF_5LTR | - |
| Hylobates_lar_LG15 | 107636583 | 107638461 | HERVHF_pol  | - |
| Hylobates_lar_LG15 | 107639235 | 107639555 | HERVHF_gag  | - |

|                    |           |           |             |   |
|--------------------|-----------|-----------|-------------|---|
| Hylobates_lar_LG15 | 107643571 | 107643982 | HERVHF_3LTR | - |
| Hylobates_lar_LG16 | 2540790   | 2541098   | HERVHF_5LTR | - |
| Hylobates_lar_LG16 | 2541650   | 2542327   | HERVHF_env  | - |
| Hylobates_lar_LG16 | 2543156   | 2544318   | HERVHF_pol  | - |
| Hylobates_lar_LG16 | 2545076   | 2545723   | HERVHF_gag  | - |
| Hylobates_lar_LG16 | 2546383   | 2546693   | HERVHF_3LTR | - |
| Hylobates_lar_LG16 | 58484169  | 58484819  | HERVHF_5LTR | - |
| Hylobates_lar_LG16 | 58485941  | 58488162  | HERVHF_pol  | - |
| Hylobates_lar_LG16 | 58487455  | 58488327  | HERVHF_pro  | - |
| Hylobates_lar_LG16 | 58488399  | 58488899  | HERVHF_gag  | - |
| Hylobates_lar_LG16 | 58491969  | 58492610  | HERVHF_3LTR | - |
| Hylobates_lar_LG16 | 64028049  | 64028441  | HERVHF_5LTR | - |
| Hylobates_lar_LG16 | 64028889  | 64031051  | HERVHF_pol  | - |
| Hylobates_lar_LG16 | 64030509  | 64031339  | HERVHF_pro  | - |
| Hylobates_lar_LG16 | 64031349  | 64031759  | HERVHF_gag  | - |
| Hylobates_lar_LG16 | 64033422  | 64033811  | HERVHF_3LTR | - |
| Hylobates_lar_LG16 | 71067430  | 71067838  | HERVHF_5LTR | + |
| Hylobates_lar_LG16 | 71069907  | 71072973  | HERVHF_pro  | + |
| Hylobates_lar_LG16 | 71072413  | 71074267  | HERVHF_pol  | + |
| Hylobates_lar_LG16 | 71076271  | 71076680  | HERVHF_3LTR | + |
| Hylobates_lar_LG16 | 79100903  | 79101276  | HERVK_5LTR  | - |
| Hylobates_lar_LG16 | 79101383  | 79101715  | HERVK_env   | - |
| Hylobates_lar_LG16 | 79102421  | 79103266  | HERVK_pol   | - |
| Hylobates_lar_LG16 | 79103170  | 79104103  | HERVK_pro   | - |
| Hylobates_lar_LG16 | 79104176  | 79105043  | HERVK_gag   | - |
| Hylobates_lar_LG16 | 79105625  | 79105994  | HERVK_3LTR  | - |
| Hylobates_lar_LG16 | 84145811  | 84146191  | HERVHF_5LTR | + |
| Hylobates_lar_LG16 | 84146666  | 84147262  | HERVHF_gag  | + |
| Hylobates_lar_LG16 | 84147199  | 84147657  | HERVHF_pro  | + |
| Hylobates_lar_LG16 | 84147710  | 84148051  | HERVHF_pol  | + |
| Hylobates_lar_LG16 | 84150247  | 84150627  | HERVHF_3LTR | + |
| Hylobates_lar_LG16 | 101610179 | 101610592 | HERVHF_5LTR | - |
| Hylobates_lar_LG16 | 101610612 | 101610917 | HERVHF_env  | - |
| Hylobates_lar_LG16 | 101611042 | 101613041 | HERVHF_pol  | - |
| Hylobates_lar_LG16 | 101613414 | 101613857 | HERVHF_gag  | - |
| Hylobates_lar_LG16 | 101617187 | 101617608 | HERVHF_3LTR | - |
| Hylobates_lar_LG17 | 10646256  | 10646670  | HERVHF_5LTR | + |
| Hylobates_lar_LG17 | 10648792  | 10650214  | HERVHF_pro  | + |
| Hylobates_lar_LG17 | 10649699  | 10651637  | HERVHF_pol  | + |
| Hylobates_lar_LG17 | 10652247  | 10652662  | HERVHF_3LTR | + |
| Hylobates_lar_LG17 | 19325665  | 19326070  | HERVHF_5LTR | - |
| Hylobates_lar_LG17 | 19326502  | 19328658  | HERVHF_pol  | - |
| Hylobates_lar_LG17 | 19328131  | 19328718  | HERVHF_pro  | - |
| Hylobates_lar_LG17 | 19331199  | 19331598  | HERVHF_3LTR | - |

|                    |                   |             |   |
|--------------------|-------------------|-------------|---|
| Hylobates_lar_LG17 | 34124424 34124837 | HERVK_5LTR  | + |
| Hylobates_lar_LG17 | 34125635 34126315 | HERVK_gag   | + |
| Hylobates_lar_LG17 | 34126565 34127290 | HERVK_pro   | + |
| Hylobates_lar_LG17 | 34127185 34128445 | HERVK_pol   | + |
| Hylobates_lar_LG17 | 34128943 34129293 | HERVK_env   | + |
| Hylobates_lar_LG17 | 34129370 34129788 | HERVK_3LTR  | + |
| Hylobates_lar_LG17 | 76674478 76674886 | HERVHF_5LTR | - |
| Hylobates_lar_LG17 | 76675481 76677198 | HERVHF_pol  | - |
| Hylobates_lar_LG17 | 76677074 76677679 | HERVHF_pro  | - |
| Hylobates_lar_LG17 | 76677775 76678089 | HERVHF_gag  | - |
| Hylobates_lar_LG17 | 76679638 76680048 | HERVHF_3LTR | - |
| Hylobates_lar_LG17 | 81172729 81173180 | HERVHF_5LTR | - |
| Hylobates_lar_LG17 | 81174337 81176262 | HERVHF_pol  | - |
| Hylobates_lar_LG17 | 81175858 81176685 | HERVHF_pro  | - |
| Hylobates_lar_LG17 | 81176721 81177101 | HERVHF_gag  | - |
| Hylobates_lar_LG17 | 81178674 81179125 | HERVHF_3LTR | - |
| Hylobates_lar_LG17 | 92049961 92050389 | HERVHF_5LTR | - |
| Hylobates_lar_LG17 | 92050970 92052927 | HERVHF_pol  | - |
| Hylobates_lar_LG17 | 92052325 92053179 | HERVHF_pro  | - |
| Hylobates_lar_LG17 | 92053272 92053595 | HERVHF_gag  | - |
| Hylobates_lar_LG17 | 92055146 92055576 | HERVHF_3LTR | - |
| Hylobates_lar_LG18 | 1601711 1602090   | HERVHF_5LTR | + |
| Hylobates_lar_LG18 | 1602714 1603256   | HERVHF_gag  | + |
| Hylobates_lar_LG18 | 1603290 1604195   | HERVHF_pro  | + |
| Hylobates_lar_LG18 | 1603578 1607120   | HERVHF_pol  | + |
| Hylobates_lar_LG18 | 1607566 1607953   | HERVHF_3LTR | + |
| Hylobates_lar_LG18 | 30372297 30372700 | HERVHF_5LTR | + |
| Hylobates_lar_LG18 | 30374413 30374823 | HERVHF_gag  | + |
| Hylobates_lar_LG18 | 30374984 30375688 | HERVHF_pro  | + |
| Hylobates_lar_LG18 | 30375050 30377391 | HERVHF_pol  | + |
| Hylobates_lar_LG18 | 30377982 30378384 | HERVHF_3LTR | + |
| Hylobates_lar_LG18 | 53587930 53588343 | HERVHF_5LTR | - |
| Hylobates_lar_LG18 | 53588932 53590738 | HERVHF_pol  | - |
| Hylobates_lar_LG18 | 53590358 53591086 | HERVHF_pro  | - |
| Hylobates_lar_LG18 | 53593122 53593519 | HERVHF_3LTR | - |
| Hylobates_lar_LG18 | 65507183 65507595 | HERVHF_5LTR | - |
| Hylobates_lar_LG18 | 65508791 65512768 | HERVHF_pol  | - |
| Hylobates_lar_LG18 | 65512226 65513011 | HERVHF_pro  | - |
| Hylobates_lar_LG18 | 65513058 65513381 | HERVHF_gag  | - |
| Hylobates_lar_LG18 | 65514025 65514436 | HERVHF_3LTR | - |
| Hylobates_lar_LG18 | 86843147 86843570 | HERVHF_5LTR | - |
| Hylobates_lar_LG18 | 86843978 86845855 | HERVHF_pol  | - |
| Hylobates_lar_LG18 | 86845881 86846291 | HERVHF_pro  | - |
| Hylobates_lar_LG18 | 86849231 86849648 | HERVHF_3LTR | - |

|                             |          |          |               |   |
|-----------------------------|----------|----------|---------------|---|
| Hylobates_lar_LG19          | 14607424 | 14607723 | HERVHF_5LTR   | - |
| Hylobates_lar_LG19          | 14608316 | 14616594 | HERVHF_pol    | - |
| Hylobates_lar_LG19          | 14620095 | 14620403 | HERVHF_3LTR   | - |
| Hylobates_lar_LG19          | 75559544 | 75559956 | HERVHF_5LTR   | - |
| Hylobates_lar_LG19          | 75560734 | 75564569 | HERVHF_pol    | - |
| Hylobates_lar_LG19          | 75564027 | 75564617 | HERVHF_pro    | - |
| Hylobates_lar_LG19          | 75564863 | 75565186 | HERVHF_gag    | - |
| Hylobates_lar_LG19          | 75567011 | 75567428 | HERVHF_3LTR   | - |
| Hylobates_lar_LG19          | 81156815 | 81157314 | HERVHF_5LTR   | + |
| Hylobates_lar_LG19          | 81159559 | 81161877 | HERVHF_pol    | + |
| Hylobates_lar_LG19          | 81162950 | 81164613 | HERVHF_env    | + |
| Hylobates_lar_LG19          | 81164800 | 81165301 | HERVHF_3LTR   | + |
| Hylobates_lar_LG20          | 16902615 | 16903045 | HERVHF_5LTR   | + |
| Hylobates_lar_LG20          | 16904617 | 16904937 | HERVHF_gag    | + |
| Hylobates_lar_LG20          | 16904944 | 16905774 | HERVHF_pro    | + |
| Hylobates_lar_LG20          | 16905175 | 16907320 | HERVHF_pol    | + |
| Hylobates_lar_LG20          | 16908295 | 16908725 | HERVHF_3LTR   | + |
| Hylobates_lar_LG20          | 64777776 | 64778164 | HSERVIII_5LTR | - |
| Hylobates_lar_LG20          | 64782157 | 64783498 | HSERVIII_pol  | - |
| Hylobates_lar_LG20          | 64792407 | 64792792 | HSERVIII_3LTR | - |
| Hylobates_lar_LG22          | 3053011  | 3053314  | HERVHF_5LTR   | + |
| Hylobates_lar_LG22          | 3054732  | 3055121  | HERVHF_gag    | + |
| Hylobates_lar_LG22          | 3055773  | 3056372  | HERVHF_pro    | + |
| Hylobates_lar_LG22          | 3055965  | 3057344  | HERVHF_pol    | + |
| Hylobates_lar_LG22          | 3060659  | 3060979  | HERVHF_3LTR   | + |
| Hylobates_lar_LG22          | 42116914 | 42117367 | HERVHF_5LTR   | - |
| Hylobates_lar_LG22          | 42118990 | 42121355 | HERVHF_pol    | - |
| Hylobates_lar_LG22          | 42120954 | 42121610 | HERVHF_pro    | - |
| Hylobates_lar_LG22          | 42122480 | 42122926 | HERVHF_3LTR   | - |
| Hylobates_lar_LG22          | 51329506 | 51329841 | HERVHF_5LTR   | - |
| Hylobates_lar_LG22          | 51332305 | 51333264 | HERVHF_pol    | - |
| Hylobates_lar_LG22          | 51335101 | 51335449 | HERVHF_3LTR   | - |
| Lemur_catta_Contig101       | 2984787  | 2985144  | HSERVIII_5LTR | + |
| Lemur_catta_Contig101       | 2986434  | 2988038  | HSERVIII_pol  | + |
| Lemur_catta_Contig101       | 2994365  | 2994703  | HSERVIII_3LTR | + |
| Lophocebus_aterrimus_ctg10  | 5726120  | 5726450  | HERVHF_5LTR   | + |
| Lophocebus_aterrimus_ctg10  | 5727921  | 5728250  | HERVHF_gag    | + |
| Lophocebus_aterrimus_ctg10  | 5729008  | 5732653  | HERVHF_pol    | + |
| Lophocebus_aterrimus_ctg10  | 5733467  | 5733798  | HERVHF_3LTR   | + |
| Lophocebus_aterrimus_ctg105 | 333776   | 334168   | HERVHF_5LTR   | - |
| Lophocebus_aterrimus_ctg105 | 335810   | 337752   | HERVHF_pol    | - |
| Lophocebus_aterrimus_ctg105 | 340520   | 340901   | HERVHF_3LTR   | - |
| Lophocebus_aterrimus_ctg109 | 4184369  | 4184669  | HERVHF_5LTR   | - |
| Lophocebus_aterrimus_ctg109 | 4185281  | 4187682  | HERVHF_pol    | - |



|                              |          |          |               |   |
|------------------------------|----------|----------|---------------|---|
| Lophocebus_aterrimus_ctg109  | 4187212  | 4188417  | HERVHF_pro    | - |
| Lophocebus_aterrimus_ctg109  | 4188494  | 4188793  | HERVHF_gag    | - |
| Lophocebus_aterrimus_ctg109  | 4190282  | 4190584  | HERVHF_3LTR   | - |
| Lophocebus_aterrimus_ctg11   | 2418964  | 2419314  | HERVHF_5LTR   | - |
| Lophocebus_aterrimus_ctg11   | 2419482  | 2420681  | HERVHF_env    | - |
| Lophocebus_aterrimus_ctg11   | 2421920  | 2423778  | HERVHF_pol    | - |
| Lophocebus_aterrimus_ctg11   | 2424211  | 2424756  | HERVHF_gag    | - |
| Lophocebus_aterrimus_ctg11   | 2426336  | 2426692  | HERVHF_3LTR   | - |
| Lophocebus_aterrimus_ctg111  | 3208381  | 3208793  | HERVHF_5LTR   | + |
| Lophocebus_aterrimus_ctg111  | 3209823  | 3213300  | HERVHF_pol    | + |
| Lophocebus_aterrimus_ctg111  | 3214651  | 3215062  | HERVHF_3LTR   | + |
| Lophocebus_aterrimus_ctg1184 | 89154    | 89585    | HERVHF_5LTR   | - |
| Lophocebus_aterrimus_ctg1184 | 94177    | 95043    | HERVHF_env    | - |
| Lophocebus_aterrimus_ctg1184 | 98121    | 100092   | HERVHF_pol    | - |
| Lophocebus_aterrimus_ctg1184 | 99595    | 100485   | HERVHF_pro    | - |
| Lophocebus_aterrimus_ctg1184 | 100917   | 101420   | HERVHF_gag    | - |
| Lophocebus_aterrimus_ctg1184 | 101900   | 102330   | HERVHF_3LTR   | - |
| Lophocebus_aterrimus_ctg119  | 2335576  | 2335888  | HERVHF_5LTR   | - |
| Lophocebus_aterrimus_ctg119  | 2337596  | 2340185  | HERVHF_pol    | - |
| Lophocebus_aterrimus_ctg119  | 2340622  | 2345000  | HERVHF_gag    | - |
| Lophocebus_aterrimus_ctg119  | 2345341  | 2345653  | HERVHF_3LTR   | - |
| Lophocebus_aterrimus_ctg13   | 8305251  | 8305563  | HERVHF_5LTR   | - |
| Lophocebus_aterrimus_ctg13   | 8306353  | 8308135  | HERVHF_pol    | - |
| Lophocebus_aterrimus_ctg13   | 8308227  | 8308559  | HERVHF_pro    | - |
| Lophocebus_aterrimus_ctg13   | 8308566  | 8309024  | HERVHF_gag    | - |
| Lophocebus_aterrimus_ctg13   | 8310458  | 8310766  | HERVHF_3LTR   | - |
| Lophocebus_aterrimus_ctg14   | 23438834 | 23439266 | HERVHF_5LTR   | + |
| Lophocebus_aterrimus_ctg14   | 23441120 | 23441476 | HERVHF_gag    | + |
| Lophocebus_aterrimus_ctg14   | 23441572 | 23442246 | HERVHF_pro    | + |
| Lophocebus_aterrimus_ctg14   | 23441833 | 23444344 | HERVHF_pol    | + |
| Lophocebus_aterrimus_ctg14   | 23444728 | 23445161 | HERVHF_3LTR   | + |
| Lophocebus_aterrimus_ctg149  | 2422262  | 2422574  | HSERVIII_5LTR | - |
| Lophocebus_aterrimus_ctg149  | 2429066  | 2434910  | HSERVIII_pol  | - |
| Lophocebus_aterrimus_ctg149  | 2436837  | 2437143  | HSERVIII_3LTR | - |
| Lophocebus_aterrimus_ctg149  | 10624085 | 10624395 | HERVHF_5LTR   | + |
| Lophocebus_aterrimus_ctg149  | 10625977 | 10626297 | HERVHF_gag    | + |
| Lophocebus_aterrimus_ctg149  | 10626290 | 10626622 | HERVHF_pro    | + |
| Lophocebus_aterrimus_ctg149  | 10626690 | 10629043 | HERVHF_pol    | + |
| Lophocebus_aterrimus_ctg149  | 10629070 | 10629371 | HERVHF_3LTR   | + |
| Lophocebus_aterrimus_ctg152  | 3913318  | 3913692  | HERVHF_5LTR   | - |
| Lophocebus_aterrimus_ctg152  | 3913858  | 3914428  | HERVHF_env    | - |
| Lophocebus_aterrimus_ctg152  | 3914773  | 3916601  | HERVHF_pol    | - |
| Lophocebus_aterrimus_ctg152  | 3916164  | 3917012  | HERVHF_pro    | - |
| Lophocebus_aterrimus_ctg152  | 3916994  | 3917437  | HERVHF_gag    | - |

|                              |          |          |             |   |
|------------------------------|----------|----------|-------------|---|
| Lophocebus_aterrimus_ctg152  | 3918790  | 3919162  | HERVHF_3LTR | - |
| Lophocebus_aterrimus_ctg160  | 11712400 | 11712829 | HERVHF_5LTR | - |
| Lophocebus_aterrimus_ctg160  | 11713425 | 11716021 | HERVHF_pol  | - |
| Lophocebus_aterrimus_ctg160  | 11718195 | 11718624 | HERVHF_3LTR | - |
| Lophocebus_aterrimus_ctg160  | 12512527 | 12512853 | HERVHF_5LTR | + |
| Lophocebus_aterrimus_ctg160  | 12515132 | 12515446 | HERVHF_gag  | + |
| Lophocebus_aterrimus_ctg160  | 12515849 | 12517427 | HERVHF_pol  | + |
| Lophocebus_aterrimus_ctg160  | 12518616 | 12518943 | HERVHF_3LTR | + |
| Lophocebus_aterrimus_ctg1634 | 10417    | 10785    | HERVHF_5LTR | + |
| Lophocebus_aterrimus_ctg1634 | 12863    | 13705    | HERVHF_pro  | + |
| Lophocebus_aterrimus_ctg1634 | 13163    | 14756    | HERVHF_pol  | + |
| Lophocebus_aterrimus_ctg1634 | 15642    | 16002    | HERVHF_3LTR | + |
| Lophocebus_aterrimus_ctg167  | 8272728  | 8273179  | HERVHF_5LTR | - |
| Lophocebus_aterrimus_ctg167  | 8274036  | 8275662  | HERVHF_pol  | - |
| Lophocebus_aterrimus_ctg167  | 8275159  | 8275896  | HERVHF_pro  | - |
| Lophocebus_aterrimus_ctg167  | 8275972  | 8276313  | HERVHF_gag  | - |
| Lophocebus_aterrimus_ctg167  | 8277903  | 8278354  | HERVHF_3LTR | - |
| Lophocebus_aterrimus_ctg17   | 981767   | 982128   | HERVHF_5LTR | + |
| Lophocebus_aterrimus_ctg17   | 984069   | 984494   | HERVHF_pro  | + |
| Lophocebus_aterrimus_ctg17   | 984520   | 985858   | HERVHF_pol  | + |
| Lophocebus_aterrimus_ctg17   | 987008   | 987379   | HERVHF_3LTR | + |
| Lophocebus_aterrimus_ctg17   | 1710312  | 1710624  | HERVHF_5LTR | + |
| Lophocebus_aterrimus_ctg17   | 1712128  | 1712448  | HERVHF_gag  | + |
| Lophocebus_aterrimus_ctg17   | 1712725  | 1714708  | HERVHF_pol  | + |
| Lophocebus_aterrimus_ctg17   | 1715837  | 1716157  | HERVHF_3LTR | + |
| Lophocebus_aterrimus_ctg170  | 3902444  | 3902813  | HERVHF_5LTR | - |
| Lophocebus_aterrimus_ctg170  | 3903045  | 3903713  | HERVHF_env  | - |
| Lophocebus_aterrimus_ctg170  | 3903919  | 3905231  | HERVHF_pol  | - |
| Lophocebus_aterrimus_ctg170  | 3904893  | 3905480  | HERVHF_pro  | - |
| Lophocebus_aterrimus_ctg170  | 3905568  | 3905891  | HERVHF_gag  | - |
| Lophocebus_aterrimus_ctg170  | 3907553  | 3907949  | HERVHF_3LTR | - |
| Lophocebus_aterrimus_ctg172  | 1102922  | 1103340  | HERVHF_5LTR | - |
| Lophocebus_aterrimus_ctg172  | 1103506  | 1103892  | HERVHF_env  | - |
| Lophocebus_aterrimus_ctg172  | 1103967  | 1106888  | HERVHF_pol  | - |
| Lophocebus_aterrimus_ctg172  | 1106502  | 1107188  | HERVHF_pro  | - |
| Lophocebus_aterrimus_ctg172  | 1107314  | 1107754  | HERVHF_gag  | - |
| Lophocebus_aterrimus_ctg172  | 1109152  | 1109563  | HERVHF_3LTR | - |
| Lophocebus_aterrimus_ctg177  | 7507376  | 7507776  | HERVHF_5LTR | - |
| Lophocebus_aterrimus_ctg177  | 7508662  | 7510869  | HERVHF_pol  | - |
| Lophocebus_aterrimus_ctg177  | 7510222  | 7510950  | HERVHF_pro  | - |
| Lophocebus_aterrimus_ctg177  | 7512083  | 7512471  | HERVHF_3LTR | - |
| Lophocebus_aterrimus_ctg183  | 23303    | 23794    | HERVHF_5LTR | + |
| Lophocebus_aterrimus_ctg183  | 24521    | 25557    | HERVHF_gag  | + |
| Lophocebus_aterrimus_ctg183  | 25366    | 26007    | HERVHF_pro  | + |

|                             |          |          |             |   |
|-----------------------------|----------|----------|-------------|---|
| Lophocebus_aterrimus_ctg183 | 26020    | 27834    | HERVHF_pol  | + |
| Lophocebus_aterrimus_ctg183 | 29236    | 29727    | HERVHF_3LTR | + |
| Lophocebus_aterrimus_ctg19  | 1227564  | 1227970  | HERVHF_5LTR | + |
| Lophocebus_aterrimus_ctg19  | 1229757  | 1230191  | HERVHF_gag  | + |
| Lophocebus_aterrimus_ctg19  | 1230181  | 1230723  | HERVHF_pro  | + |
| Lophocebus_aterrimus_ctg19  | 1230641  | 1232765  | HERVHF_pol  | + |
| Lophocebus_aterrimus_ctg19  | 1233238  | 1233762  | HERVHF_env  | + |
| Lophocebus_aterrimus_ctg19  | 1234101  | 1234522  | HERVHF_3LTR | + |
| Lophocebus_aterrimus_ctg19  | 1791150  | 1791582  | HERVHF_5LTR | - |
| Lophocebus_aterrimus_ctg19  | 1791899  | 1792414  | HERVHF_env  | - |
| Lophocebus_aterrimus_ctg19  | 1792726  | 1794618  | HERVHF_pol  | - |
| Lophocebus_aterrimus_ctg19  | 1794951  | 1795250  | HERVHF_gag  | - |
| Lophocebus_aterrimus_ctg19  | 1796800  | 1797230  | HERVHF_3LTR | - |
| Lophocebus_aterrimus_ctg193 | 618107   | 618559   | HERVHF_5LTR | + |
| Lophocebus_aterrimus_ctg193 | 621253   | 621675   | HERVHF_pro  | + |
| Lophocebus_aterrimus_ctg193 | 621475   | 623134   | HERVHF_pol  | + |
| Lophocebus_aterrimus_ctg193 | 623433   | 624107   | HERVHF_env  | + |
| Lophocebus_aterrimus_ctg193 | 624268   | 624726   | HERVHF_3LTR | + |
| Lophocebus_aterrimus_ctg193 | 1902562  | 1902953  | HERVHF_5LTR | - |
| Lophocebus_aterrimus_ctg193 | 1905111  | 1908573  | HERVHF_pol  | - |
| Lophocebus_aterrimus_ctg193 | 1907971  | 1908864  | HERVHF_pro  | - |
| Lophocebus_aterrimus_ctg193 | 1909304  | 1909711  | HERVHF_gag  | - |
| Lophocebus_aterrimus_ctg193 | 1911022  | 1911422  | HERVHF_3LTR | - |
| Lophocebus_aterrimus_ctg207 | 5923382  | 5923801  | HERVHF_5LTR | + |
| Lophocebus_aterrimus_ctg207 | 5925088  | 5925507  | HERVHF_gag  | + |
| Lophocebus_aterrimus_ctg207 | 5925818  | 5926444  | HERVHF_pro  | + |
| Lophocebus_aterrimus_ctg207 | 5925866  | 5927464  | HERVHF_pol  | + |
| Lophocebus_aterrimus_ctg207 | 5928775  | 5929199  | HERVHF_3LTR | + |
| Lophocebus_aterrimus_ctg208 | 2193111  | 2193565  | HERVHF_5LTR | - |
| Lophocebus_aterrimus_ctg208 | 2194250  | 2196189  | HERVHF_pol  | - |
| Lophocebus_aterrimus_ctg208 | 2198483  | 2198924  | HERVHF_3LTR | - |
| Lophocebus_aterrimus_ctg233 | 2305824  | 2306175  | HERVHF_5LTR | + |
| Lophocebus_aterrimus_ctg233 | 2307748  | 2308047  | HERVHF_gag  | + |
| Lophocebus_aterrimus_ctg233 | 2308061  | 2308450  | HERVHF_pro  | + |
| Lophocebus_aterrimus_ctg233 | 2308594  | 2309034  | HERVHF_pol  | + |
| Lophocebus_aterrimus_ctg233 | 2310071  | 2310435  | HERVHF_3LTR | + |
| Lophocebus_aterrimus_ctg24  | 23661915 | 23662322 | HERVHF_5LTR | + |
| Lophocebus_aterrimus_ctg24  | 23663674 | 23664108 | HERVHF_gag  | + |
| Lophocebus_aterrimus_ctg24  | 23664681 | 23665331 | HERVHF_pro  | + |
| Lophocebus_aterrimus_ctg24  | 23664690 | 23667014 | HERVHF_pol  | + |
| Lophocebus_aterrimus_ctg24  | 23667332 | 23667643 | HERVHF_env  | + |
| Lophocebus_aterrimus_ctg24  | 23667806 | 23668217 | HERVHF_3LTR | + |
| Lophocebus_aterrimus_ctg246 | 8256288  | 8256658  | HERVHF_5LTR | + |
| Lophocebus_aterrimus_ctg246 | 8258683  | 8259510  | HERVHF_pro  | + |

|                             |          |          |                |   |
|-----------------------------|----------|----------|----------------|---|
| Lophocebus_aterrimus_ctg246 | 8258968  | 8260871  | HERVHF_pol     | + |
| Lophocebus_aterrimus_ctg246 | 8261305  | 8261681  | HERVHF_3LTR    | + |
| Lophocebus_aterrimus_ctg252 | 3508946  | 3509349  | HERVIPADP_5LTR | + |
| Lophocebus_aterrimus_ctg252 | 3510828  | 3511160  | HERVIPADP_gag  | + |
| Lophocebus_aterrimus_ctg252 | 3512230  | 3514739  | HERVIPADP_pol  | + |
| Lophocebus_aterrimus_ctg252 | 3516026  | 3516592  | HERVIPADP_env  | + |
| Lophocebus_aterrimus_ctg252 | 3516793  | 3517214  | HERVIPADP_3LTR | + |
| Lophocebus_aterrimus_ctg257 | 3564382  | 3564778  | HERVHF_5LTR    | - |
| Lophocebus_aterrimus_ctg257 | 3565756  | 3567541  | HERVHF_pol     | - |
| Lophocebus_aterrimus_ctg257 | 3566948  | 3567733  | HERVHF_pro     | - |
| Lophocebus_aterrimus_ctg257 | 3569586  | 3569983  | HERVHF_3LTR    | - |
| Lophocebus_aterrimus_ctg268 | 2172688  | 2173116  | HERVHF_5LTR    | - |
| Lophocebus_aterrimus_ctg268 | 2173380  | 2174780  | HERVHF_pol     | - |
| Lophocebus_aterrimus_ctg268 | 2175436  | 2175861  | HERVHF_3LTR    | - |
| Lophocebus_aterrimus_ctg282 | 104104   | 104449   | HERVHF_5LTR    | + |
| Lophocebus_aterrimus_ctg282 | 105568   | 106137   | HERVHF_gag     | + |
| Lophocebus_aterrimus_ctg282 | 107106   | 115305   | HERVHF_pol     | + |
| Lophocebus_aterrimus_ctg282 | 117987   | 118580   | HERVHF_env     | + |
| Lophocebus_aterrimus_ctg282 | 118863   | 119212   | HERVHF_3LTR    | + |
| Lophocebus_aterrimus_ctg297 | 1650212  | 1650531  | HERVHF_5LTR    | - |
| Lophocebus_aterrimus_ctg297 | 1656548  | 1658719  | HERVHF_pol     | - |
| Lophocebus_aterrimus_ctg297 | 1662076  | 1662391  | HERVHF_3LTR    | - |
| Lophocebus_aterrimus_ctg35  | 6373193  | 6373533  | HERVHF_5LTR    | - |
| Lophocebus_aterrimus_ctg35  | 6374540  | 6376211  | HERVHF_pol     | - |
| Lophocebus_aterrimus_ctg35  | 6376288  | 6376707  | HERVHF_pro     | - |
| Lophocebus_aterrimus_ctg35  | 6378487  | 6378823  | HERVHF_3LTR    | - |
| Lophocebus_aterrimus_ctg360 | 1269569  | 1269936  | HERVHF_5LTR    | - |
| Lophocebus_aterrimus_ctg360 | 1270705  | 1272765  | HERVHF_pol     | - |
| Lophocebus_aterrimus_ctg360 | 1272208  | 1273026  | HERVHF_pro     | - |
| Lophocebus_aterrimus_ctg360 | 1273016  | 1273357  | HERVHF_gag     | - |
| Lophocebus_aterrimus_ctg360 | 1274807  | 1275175  | HERVHF_3LTR    | - |
| Lophocebus_aterrimus_ctg37  | 15247110 | 15247425 | HERVK_5LTR     | + |
| Lophocebus_aterrimus_ctg37  | 15247823 | 15248380 | HERVK_gag      | + |
| Lophocebus_aterrimus_ctg37  | 15248864 | 15249994 | HERVK_pro      | + |
| Lophocebus_aterrimus_ctg37  | 15249976 | 15251869 | HERVK_pol      | + |
| Lophocebus_aterrimus_ctg37  | 15252340 | 15252657 | HERVK_env      | + |
| Lophocebus_aterrimus_ctg37  | 15253233 | 15253567 | HERVK_3LTR     | + |
| Lophocebus_aterrimus_ctg370 | 2430413  | 2430723  | HERVHF_5LTR    | - |
| Lophocebus_aterrimus_ctg370 | 2431544  | 2433298  | HERVHF_pol     | - |
| Lophocebus_aterrimus_ctg370 | 2433193  | 2433732  | HERVHF_pro     | - |
| Lophocebus_aterrimus_ctg370 | 2433785  | 2434228  | HERVHF_gag     | - |
| Lophocebus_aterrimus_ctg370 | 2435613  | 2435915  | HERVHF_3LTR    | - |
| Lophocebus_aterrimus_ctg373 | 3593846  | 3594170  | HERVK_5LTR     | - |
| Lophocebus_aterrimus_ctg373 | 3595000  | 3596302  | HERVK_pol      | - |

|                             |          |          |                |   |
|-----------------------------|----------|----------|----------------|---|
| Lophocebus_aterrimus_ctg373 | 3597560  | 3598360  | HERVK_pro      | - |
| Lophocebus_aterrimus_ctg373 | 3599568  | 3599892  | HERVK_3LTR     | - |
| Lophocebus_aterrimus_ctg38  | 13176080 | 13176535 | HERVHF_5LTR    | - |
| Lophocebus_aterrimus_ctg38  | 13177131 | 13179469 | HERVHF_pol     | - |
| Lophocebus_aterrimus_ctg38  | 13179037 | 13180629 | HERVHF_pro     | - |
| Lophocebus_aterrimus_ctg38  | 13180387 | 13180719 | HERVHF_gag     | - |
| Lophocebus_aterrimus_ctg38  | 13182264 | 13182725 | HERVHF_3LTR    | - |
| Lophocebus_aterrimus_ctg403 | 1096939  | 1097263  | HERVHF_5LTR    | - |
| Lophocebus_aterrimus_ctg403 | 1097868  | 1100018  | HERVHF_pol     | - |
| Lophocebus_aterrimus_ctg403 | 1099506  | 1100315  | HERVHF_pro     | - |
| Lophocebus_aterrimus_ctg403 | 1100308  | 1100880  | HERVHF_gag     | - |
| Lophocebus_aterrimus_ctg403 | 1102193  | 1102533  | HERVHF_3LTR    | - |
| Lophocebus_aterrimus_ctg436 | 790011   | 790380   | HERVHF_5LTR    | + |
| Lophocebus_aterrimus_ctg436 | 792493   | 794663   | HERVHF_pol     | + |
| Lophocebus_aterrimus_ctg436 | 795211   | 795583   | HERVHF_3LTR    | + |
| Lophocebus_aterrimus_ctg46  | 5642080  | 5642520  | HERVHF_5LTR    | - |
| Lophocebus_aterrimus_ctg46  | 5643061  | 5645339  | HERVHF_pol     | - |
| Lophocebus_aterrimus_ctg46  | 5646193  | 5647277  | HERVHF_gag     | - |
| Lophocebus_aterrimus_ctg46  | 5648083  | 5648515  | HERVHF_3LTR    | - |
| Lophocebus_aterrimus_ctg46  | 22414998 | 22415328 | HERVK_5LTR     | - |
| Lophocebus_aterrimus_ctg46  | 22415602 | 22415946 | HERVK_env      | - |
| Lophocebus_aterrimus_ctg46  | 22416556 | 22418035 | HERVK_pol      | - |
| Lophocebus_aterrimus_ctg46  | 22417948 | 22418698 | HERVK_pro      | - |
| Lophocebus_aterrimus_ctg46  | 22418810 | 22419343 | HERVK_gag      | - |
| Lophocebus_aterrimus_ctg46  | 22420236 | 22420562 | HERVK_3LTR     | - |
| Lophocebus_aterrimus_ctg47  | 8752589  | 8752987  | HERVHF_5LTR    | + |
| Lophocebus_aterrimus_ctg47  | 8754313  | 8754663  | HERVHF_gag     | + |
| Lophocebus_aterrimus_ctg47  | 8754830  | 8755243  | HERVHF_pro     | + |
| Lophocebus_aterrimus_ctg47  | 8755219  | 8757015  | HERVHF_pol     | + |
| Lophocebus_aterrimus_ctg47  | 8758835  | 8759176  | HERVHF_env     | + |
| Lophocebus_aterrimus_ctg47  | 8759342  | 8759732  | HERVHF_3LTR    | + |
| Lophocebus_aterrimus_ctg48  | 6152496  | 6152965  | HERVHF_5LTR    | + |
| Lophocebus_aterrimus_ctg48  | 6155459  | 6155896  | HERVHF_pro     | + |
| Lophocebus_aterrimus_ctg48  | 6155483  | 6157199  | HERVHF_pol     | + |
| Lophocebus_aterrimus_ctg48  | 6158392  | 6158862  | HERVHF_3LTR    | + |
| Lophocebus_aterrimus_ctg516 | 2182644  | 2183040  | HERVHF_5LTR    | + |
| Lophocebus_aterrimus_ctg516 | 2185785  | 2186378  | HERVHF_pro     | + |
| Lophocebus_aterrimus_ctg516 | 2185971  | 2187957  | HERVHF_pol     | + |
| Lophocebus_aterrimus_ctg516 | 2188400  | 2188799  | HERVHF_3LTR    | + |
| Lophocebus_aterrimus_ctg520 | 1471706  | 1472251  | HERVHF_5LTR    | + |
| Lophocebus_aterrimus_ctg520 | 1477641  | 1478411  | HERVHF_pro     | + |
| Lophocebus_aterrimus_ctg520 | 1477773  | 1479866  | HERVHF_pol     | + |
| Lophocebus_aterrimus_ctg520 | 1486385  | 1486920  | HERVHF_3LTR    | + |
| Lophocebus_aterrimus_ctg54  | 905476   | 905867   | HERVIPADP_5LTR | - |

|                             |          |          |                |   |
|-----------------------------|----------|----------|----------------|---|
| Lophocebus_aterrimus_ctg54  | 906417   | 907049   | HERVIPADP_env  | - |
| Lophocebus_aterrimus_ctg54  | 908707   | 911536   | HERVIPADP_pol  | - |
| Lophocebus_aterrimus_ctg54  | 912137   | 912667   | HERVIPADP_gag  | - |
| Lophocebus_aterrimus_ctg54  | 914338   | 914719   | HERVIPADP_3LTR | - |
| Lophocebus_aterrimus_ctg54  | 9744379  | 9744781  | HERVHF_5LTR    | - |
| Lophocebus_aterrimus_ctg54  | 9745366  | 9747785  | HERVHF_pol     | - |
| Lophocebus_aterrimus_ctg54  | 9747225  | 9748085  | HERVHF_pro     | - |
| Lophocebus_aterrimus_ctg54  | 9748087  | 9748449  | HERVHF_gag     | - |
| Lophocebus_aterrimus_ctg54  | 9749924  | 9750313  | HERVHF_3LTR    | - |
| Lophocebus_aterrimus_ctg55  | 18409799 | 18410150 | HERVHF_5LTR    | + |
| Lophocebus_aterrimus_ctg55  | 18412122 | 18412544 | HERVHF_pro     | + |
| Lophocebus_aterrimus_ctg55  | 18412493 | 18414729 | HERVHF_pol     | + |
| Lophocebus_aterrimus_ctg55  | 18415672 | 18416004 | HERVHF_3LTR    | + |
| Lophocebus_aterrimus_ctg575 | 88937    | 89315    | HERVHF_5LTR    | + |
| Lophocebus_aterrimus_ctg575 | 90777    | 91076    | HERVHF_gag     | + |
| Lophocebus_aterrimus_ctg575 | 91099    | 91479    | HERVHF_pro     | + |
| Lophocebus_aterrimus_ctg575 | 91408    | 92528    | HERVHF_pol     | + |
| Lophocebus_aterrimus_ctg575 | 93668    | 94044    | HERVHF_3LTR    | + |
| Lophocebus_aterrimus_ctg598 | 31852    | 32179    | HERVHF_5LTR    | - |
| Lophocebus_aterrimus_ctg598 | 32360    | 33060    | HERVHF_env     | - |
| Lophocebus_aterrimus_ctg598 | 33181    | 34153    | HERVHF_pol     | - |
| Lophocebus_aterrimus_ctg598 | 34347    | 34982    | HERVHF_pro     | - |
| Lophocebus_aterrimus_ctg598 | 37009    | 37333    | HERVHF_3LTR    | - |
| Lophocebus_aterrimus_ctg60  | 3840210  | 3840521  | HERVHF_5LTR    | - |
| Lophocebus_aterrimus_ctg60  | 3841357  | 3843128  | HERVHF_pol     | - |
| Lophocebus_aterrimus_ctg60  | 3842943  | 3843875  | HERVHF_pro     | - |
| Lophocebus_aterrimus_ctg60  | 3846788  | 3847105  | HERVHF_3LTR    | - |
| Lophocebus_aterrimus_ctg601 | 279886   | 280264   | HERVHF_5LTR    | - |
| Lophocebus_aterrimus_ctg601 | 280415   | 280771   | HERVHF_env     | - |
| Lophocebus_aterrimus_ctg601 | 280881   | 283887   | HERVHF_pol     | - |
| Lophocebus_aterrimus_ctg601 | 283878   | 284189   | HERVHF_gag     | - |
| Lophocebus_aterrimus_ctg601 | 285542   | 285920   | HERVHF_3LTR    | - |
| Lophocebus_aterrimus_ctg61  | 10495144 | 10495623 | HERVK_5LTR     | + |
| Lophocebus_aterrimus_ctg61  | 10497063 | 10498004 | HERVK_pro      | + |
| Lophocebus_aterrimus_ctg61  | 10497929 | 10499480 | HERVK_pol      | + |
| Lophocebus_aterrimus_ctg61  | 10500167 | 10500481 | HERVK_env      | + |
| Lophocebus_aterrimus_ctg61  | 10500579 | 10501046 | HERVK_3LTR     | + |
| Lophocebus_aterrimus_ctg620 | 136412   | 136730   | HERVHF_5LTR    | + |
| Lophocebus_aterrimus_ctg620 | 138315   | 138698   | HERVHF_gag     | + |
| Lophocebus_aterrimus_ctg620 | 138749   | 139554   | HERVHF_pro     | + |
| Lophocebus_aterrimus_ctg620 | 139261   | 139755   | HERVHF_pol     | + |
| Lophocebus_aterrimus_ctg620 | 140047   | 140409   | HERVHF_env     | + |
| Lophocebus_aterrimus_ctg620 | 140697   | 141023   | HERVHF_3LTR    | + |
| Lophocebus_aterrimus_ctg630 | 655652   | 656087   | HERVK_5LTR     | - |

|                             |          |          |                |   |
|-----------------------------|----------|----------|----------------|---|
| Lophocebus_aterrimus_ctg630 | 656158   | 656478   | HERVK_env      | - |
| Lophocebus_aterrimus_ctg630 | 657758   | 658621   | HERVK_pol      | - |
| Lophocebus_aterrimus_ctg630 | 658082   | 659329   | HERVK_pro      | - |
| Lophocebus_aterrimus_ctg630 | 660107   | 660550   | HERVK_3LTR     | - |
| Lophocebus_aterrimus_ctg64  | 11221376 | 11221807 | HERVHF_5LTR    | - |
| Lophocebus_aterrimus_ctg64  | 11223025 | 11224871 | HERVHF_pol     | - |
| Lophocebus_aterrimus_ctg64  | 11224287 | 11225072 | HERVHF_pro     | - |
| Lophocebus_aterrimus_ctg64  | 11225122 | 11225558 | HERVHF_gag     | - |
| Lophocebus_aterrimus_ctg64  | 11227154 | 11227587 | HERVHF_3LTR    | - |
| Lophocebus_aterrimus_ctg649 | 691584   | 691984   | HERVHF_5LTR    | - |
| Lophocebus_aterrimus_ctg649 | 692803   | 695049   | HERVHF_pol     | - |
| Lophocebus_aterrimus_ctg649 | 694411   | 695142   | HERVHF_pro     | - |
| Lophocebus_aterrimus_ctg649 | 695241   | 696988   | HERVHF_gag     | - |
| Lophocebus_aterrimus_ctg649 | 698546   | 698937   | HERVHF_3LTR    | - |
| Lophocebus_aterrimus_ctg65  | 5249192  | 5249503  | HERVHF_5LTR    | - |
| Lophocebus_aterrimus_ctg65  | 5250333  | 5252382  | HERVHF_pol     | - |
| Lophocebus_aterrimus_ctg65  | 5252331  | 5252792  | HERVHF_pro     | - |
| Lophocebus_aterrimus_ctg65  | 5254790  | 5255105  | HERVHF_3LTR    | - |
| Lophocebus_aterrimus_ctg671 | 607784   | 608240   | HERVK_5LTR     | - |
| Lophocebus_aterrimus_ctg671 | 609748   | 611287   | HERVK_pol      | - |
| Lophocebus_aterrimus_ctg671 | 611206   | 611826   | HERVK_pro      | - |
| Lophocebus_aterrimus_ctg671 | 612433   | 613020   | HERVK_gag      | - |
| Lophocebus_aterrimus_ctg671 | 613564   | 614036   | HERVK_3LTR     | - |
| Lophocebus_aterrimus_ctg7   | 7438691  | 7439161  | HERVK_5LTR     | + |
| Lophocebus_aterrimus_ctg7   | 7440107  | 7441006  | HERVK_pro      | + |
| Lophocebus_aterrimus_ctg7   | 7440901  | 7442648  | HERVK_pol      | + |
| Lophocebus_aterrimus_ctg7   | 7443332  | 7443648  | HERVK_env      | + |
| Lophocebus_aterrimus_ctg7   | 7443766  | 7444231  | HERVK_3LTR     | + |
| Lophocebus_aterrimus_ctg706 | 339993   | 340294   | HERVIPADP_5LTR | + |
| Lophocebus_aterrimus_ctg706 | 345220   | 346359   | HERVIPADP_pol  | + |
| Lophocebus_aterrimus_ctg706 | 350457   | 350761   | HERVIPADP_3LTR | + |
| Lophocebus_aterrimus_ctg706 | 602520   | 602989   | HERVHF_5LTR    | - |
| Lophocebus_aterrimus_ctg706 | 603543   | 604100   | HERVHF_env     | - |
| Lophocebus_aterrimus_ctg706 | 606969   | 607664   | HERVHF_pol     | - |
| Lophocebus_aterrimus_ctg706 | 610974   | 611433   | HERVHF_3LTR    | - |
| Lophocebus_aterrimus_ctg71  | 9396930  | 9397291  | HERVHF_5LTR    | - |
| Lophocebus_aterrimus_ctg71  | 9397762  | 9399630  | HERVHF_pol     | - |
| Lophocebus_aterrimus_ctg71  | 9399645  | 9399977  | HERVHF_pro     | - |
| Lophocebus_aterrimus_ctg71  | 9402192  | 9402557  | HERVHF_3LTR    | - |
| Lophocebus_aterrimus_ctg727 | 432656   | 433017   | HERVHF_5LTR    | - |
| Lophocebus_aterrimus_ctg727 | 435175   | 437723   | HERVHF_pol     | - |
| Lophocebus_aterrimus_ctg727 | 438848   | 439220   | HERVHF_3LTR    | - |
| Lophocebus_aterrimus_ctg734 | 280417   | 280845   | HERVK_5LTR     | - |
| Lophocebus_aterrimus_ctg734 | 281155   | 282013   | HERVK_env      | - |

|                             |          |          |                   |   |
|-----------------------------|----------|----------|-------------------|---|
| Lophocebus_aterrimus_ctg734 | 283168   | 284082   | HERVK_pol         | - |
| Lophocebus_aterrimus_ctg734 | 283807   | 285054   | HERVK_pro         | - |
| Lophocebus_aterrimus_ctg734 | 287858   | 288284   | HERVK_3LTR        | - |
| Lophocebus_aterrimus_ctg78  | 4820872  | 4821573  | HERVHF_5LTR       | - |
| Lophocebus_aterrimus_ctg78  | 4821578  | 4822236  | HERVHF_env        | - |
| Lophocebus_aterrimus_ctg78  | 4823634  | 4826243  | HERVHF_pol        | - |
| Lophocebus_aterrimus_ctg78  | 4827357  | 4828130  | HERVHF_gag        | - |
| Lophocebus_aterrimus_ctg78  | 4828935  | 4829648  | HERVHF_3LTR       | - |
| Lophocebus_aterrimus_ctg8   | 4834017  | 4834473  | HERVHF_5LTR       | - |
| Lophocebus_aterrimus_ctg8   | 4836045  | 4837537  | HERVHF_pol        | - |
| Lophocebus_aterrimus_ctg8   | 4837461  | 4838000  | HERVHF_pro        | - |
| Lophocebus_aterrimus_ctg8   | 4837996  | 4838319  | HERVHF_gag        | - |
| Lophocebus_aterrimus_ctg8   | 4840063  | 4840519  | HERVHF_3LTR       | - |
| Lophocebus_aterrimus_ctg828 | 240217   | 240617   | HERVHF_5LTR       | + |
| Lophocebus_aterrimus_ctg828 | 242215   | 242670   | HERVHF_gag        | + |
| Lophocebus_aterrimus_ctg828 | 242680   | 243195   | HERVHF_pro        | + |
| Lophocebus_aterrimus_ctg828 | 243075   | 245243   | HERVHF_pol        | + |
| Lophocebus_aterrimus_ctg828 | 245467   | 245847   | HERVHF_env        | + |
| Lophocebus_aterrimus_ctg828 | 246011   | 246418   | HERVHF_3LTR       | + |
| Lophocebus_aterrimus_ctg833 | 262362   | 262781   | HERVHF_5LTR       | + |
| Lophocebus_aterrimus_ctg833 | 264012   | 264611   | HERVHF_gag        | + |
| Lophocebus_aterrimus_ctg833 | 264635   | 265615   | HERVHF_pro        | + |
| Lophocebus_aterrimus_ctg833 | 265031   | 267567   | HERVHF_pol        | + |
| Lophocebus_aterrimus_ctg833 | 268580   | 269013   | HERVHF_3LTR       | + |
| Lophocebus_aterrimus_ctg84  | 5066670  | 5067088  | HERVHF_5LTR       | + |
| Lophocebus_aterrimus_ctg84  | 5070532  | 5070855  | HERVHF_gag        | + |
| Lophocebus_aterrimus_ctg84  | 5071032  | 5071658  | HERVHF_pro        | + |
| Lophocebus_aterrimus_ctg84  | 5071137  | 5073638  | HERVHF_pol        | + |
| Lophocebus_aterrimus_ctg84  | 5074095  | 5074524  | HERVHF_3LTR       | + |
| Lophocebus_aterrimus_ctg872 | 52807    | 53127    | HERVHF_5LTR       | - |
| Lophocebus_aterrimus_ctg872 | 60557    | 61885    | HERVHF_pol        | - |
| Lophocebus_aterrimus_ctg872 | 61376    | 62095    | HERVHF_pro        | - |
| Lophocebus_aterrimus_ctg872 | 62176    | 62499    | HERVHF_gag        | - |
| Lophocebus_aterrimus_ctg872 | 67621    | 67949    | HERVHF_3LTR       | - |
| Lophocebus_aterrimus_ctg97  | 250019   | 250470   | HERVHF_5LTR       | - |
| Lophocebus_aterrimus_ctg97  | 250915   | 252803   | HERVHF_pol        | - |
| Lophocebus_aterrimus_ctg97  | 252787   | 253278   | HERVHF_pro        | - |
| Lophocebus_aterrimus_ctg97  | 253274   | 253594   | HERVHF_gag        | - |
| Lophocebus_aterrimus_ctg97  | 255305   | 255759   | HERVHF_3LTR       | - |
| Lophocebus_aterrimus_ctg97  | 12048706 | 12049290 | HERVIPADP_5LTR    | + |
| Lophocebus_aterrimus_ctg97  | 12050069 | 12050554 | HERVIPADP_gag     | + |
| Lophocebus_aterrimus_ctg97  | 12051255 | 12054937 | HERVIPADP_pol     | + |
| Lophocebus_aterrimus_ctg97  | 12057014 | 12057596 | HERVIPADP_3LTR    | + |
| Loris_tardigradus_ctg538    | 584098   | 584650   | Unknown_HERV_5LTR | - |



|                             |          |          |                   |   |
|-----------------------------|----------|----------|-------------------|---|
| Loris_tardigradus_ctg538    | 588730   | 590297   | Unknown_HERV_pol  | - |
| Loris_tardigradus_ctg538    | 589977   | 590988   | Unknown_HERV_pro  | - |
| Loris_tardigradus_ctg538    | 593040   | 593594   | Unknown_HERV_3LTR | - |
| Macaca_assamensis_Contig1   | 29597833 | 29598173 | HERVK_5LTR        | - |
| Macaca_assamensis_Contig1   | 29598406 | 29598837 | HERVK_env         | - |
| Macaca_assamensis_Contig1   | 29599406 | 29601162 | HERVK_pol         | - |
| Macaca_assamensis_Contig1   | 29601021 | 29601851 | HERVK_pro         | - |
| Macaca_assamensis_Contig1   | 29602892 | 29603248 | HERVK_3LTR        | - |
| Macaca_assamensis_Contig1   | 32206558 | 32206875 | HSERVIII_5LTR     | - |
| Macaca_assamensis_Contig1   | 32210533 | 32210958 | HSERVIII_pol      | - |
| Macaca_assamensis_Contig1   | 32215272 | 32215603 | HSERVIII_3LTR     | - |
| Macaca_assamensis_Contig128 | 321722   | 322169   | HERVK_5LTR        | - |
| Macaca_assamensis_Contig128 | 322249   | 322611   | HERVK_env         | - |
| Macaca_assamensis_Contig128 | 323432   | 324238   | HERVK_pol         | - |
| Macaca_assamensis_Contig128 | 324231   | 325070   | HERVK_pro         | - |
| Macaca_assamensis_Contig128 | 325873   | 326314   | HERVK_3LTR        | - |
| Macaca_assamensis_Contig14  | 20277002 | 20277319 | HERVIPADP_5LTR    | + |
| Macaca_assamensis_Contig14  | 20279095 | 20279451 | HERVIPADP_gag     | + |
| Macaca_assamensis_Contig14  | 20280051 | 20284627 | HERVIPADP_pol     | + |
| Macaca_assamensis_Contig14  | 20290934 | 20291247 | HERVIPADP_3LTR    | + |
| Macaca_assamensis_Contig177 | 1327343  | 1327642  | HSERVIII_5LTR     | + |
| Macaca_assamensis_Contig177 | 1336281  | 1336712  | HSERVIII_pol      | + |
| Macaca_assamensis_Contig177 | 1341536  | 1341838  | HSERVIII_3LTR     | + |
| Macaca_assamensis_Contig19  | 23147483 | 23147802 | HSERVIII_5LTR     | + |
| Macaca_assamensis_Contig19  | 23149806 | 23152541 | HSERVIII_pol      | + |
| Macaca_assamensis_Contig19  | 23153491 | 23153804 | HSERVIII_3LTR     | + |
| Macaca_assamensis_Contig196 | 872615   | 872949   | HERVK_5LTR        | - |
| Macaca_assamensis_Contig196 | 873048   | 873422   | HERVK_env         | - |
| Macaca_assamensis_Contig196 | 874079   | 875560   | HERVK_pol         | - |
| Macaca_assamensis_Contig196 | 875857   | 876396   | HERVK_pro         | - |
| Macaca_assamensis_Contig196 | 876261   | 877685   | HERVK_gag         | - |
| Macaca_assamensis_Contig196 | 878025   | 878349   | HERVK_3LTR        | - |
| Macaca_assamensis_Contig20  | 32205658 | 32205982 | HERVHF_5LTR       | + |
| Macaca_assamensis_Contig20  | 32208199 | 32208840 | HERVHF_pro        | + |
| Macaca_assamensis_Contig20  | 32208220 | 32209493 | HERVHF_pol        | + |
| Macaca_assamensis_Contig20  | 32209831 | 32210444 | HERVHF_env        | + |
| Macaca_assamensis_Contig20  | 32210809 | 32211136 | HERVHF_3LTR       | + |
| Macaca_assamensis_Contig3   | 21430222 | 21430733 | HERVK_5LTR        | - |
| Macaca_assamensis_Contig3   | 21431660 | 21432929 | HERVK_pol         | - |
| Macaca_assamensis_Contig3   | 21432824 | 21433765 | HERVK_pro         | - |
| Macaca_assamensis_Contig3   | 21435193 | 21435702 | HERVK_3LTR        | - |
| Macaca_assamensis_Contig3   | 52160800 | 52161187 | HERVK_5LTR        | + |
| Macaca_assamensis_Contig3   | 52161703 | 52162191 | HERVK_gag         | + |
| Macaca_assamensis_Contig3   | 52162843 | 52163600 | HERVK_pro         | + |

|                            |           |           |               |   |
|----------------------------|-----------|-----------|---------------|---|
| Macaca_assamensis_Contig3  | 52163495  | 52165019  | HERVK_pol     | + |
| Macaca_assamensis_Contig3  | 52165677  | 52166272  | HERVK_env     | + |
| Macaca_assamensis_Contig3  | 52166274  | 52166655  | HERVK_3LTR    | + |
| Macaca_assamensis_Contig37 | 13368774  | 13369115  | HERVK_5LTR    | - |
| Macaca_assamensis_Contig37 | 13370087  | 13371977  | HERVK_pol     | - |
| Macaca_assamensis_Contig37 | 13372042  | 13372809  | HERVK_pro     | - |
| Macaca_assamensis_Contig37 | 13374229  | 13374582  | HERVK_3LTR    | - |
| Macaca_assamensis_Contig5  | 56349283  | 56349650  | HERVHF_5LTR   | - |
| Macaca_assamensis_Contig5  | 56350419  | 56352479  | HERVHF_pol    | - |
| Macaca_assamensis_Contig5  | 56351880  | 56352671  | HERVHF_pro    | - |
| Macaca_assamensis_Contig5  | 56352760  | 56353071  | HERVHF_gag    | - |
| Macaca_assamensis_Contig5  | 56354519  | 56354886  | HERVHF_3LTR   | - |
| Macaca_assamensis_Contig6  | 43969422  | 43969929  | HERVK_5LTR    | + |
| Macaca_assamensis_Contig6  | 43970782  | 43971480  | HERVK_pro     | + |
| Macaca_assamensis_Contig6  | 43971669  | 43973216  | HERVK_pol     | + |
| Macaca_assamensis_Contig6  | 43973960  | 43974417  | HERVK_env     | + |
| Macaca_assamensis_Contig6  | 43974438  | 43974955  | HERVK_3LTR    | + |
| Macaca_assamensis_Contig67 | 12584223  | 12584739  | HERVK_5LTR    | - |
| Macaca_assamensis_Contig67 | 12585637  | 12587198  | HERVK_pol     | - |
| Macaca_assamensis_Contig67 | 12587314  | 12587823  | HERVK_pro     | - |
| Macaca_assamensis_Contig67 | 12589386  | 12589900  | HERVK_3LTR    | - |
| Macaca_mulatta_chr1        | 74634679  | 74635023  | HERVHF_5LTR   | + |
| Macaca_mulatta_chr1        | 74636800  | 74637198  | HERVHF_pro    | + |
| Macaca_mulatta_chr1        | 74637188  | 74640162  | HERVHF_pol    | + |
| Macaca_mulatta_chr1        | 74640847  | 74641205  | HERVHF_3LTR   | + |
| Macaca_mulatta_chr1        | 111474064 | 111474387 | HERVHF_5LTR   | - |
| Macaca_mulatta_chr1        | 111475008 | 111477446 | HERVHF_pol    | - |
| Macaca_mulatta_chr1        | 111477547 | 111478254 | HERVHF_pro    | - |
| Macaca_mulatta_chr1        | 111478304 | 111478636 | HERVHF_gag    | - |
| Macaca_mulatta_chr1        | 111479993 | 111480324 | HERVHF_3LTR   | - |
| Macaca_mulatta_chr1        | 124030176 | 124030489 | HSERVIII_5LTR | + |
| Macaca_mulatta_chr1        | 124039199 | 124039570 | HSERVIII_pol  | + |
| Macaca_mulatta_chr1        | 124044396 | 124044714 | HSERVIII_3LTR | + |
| Macaca_mulatta_chr1        | 146606373 | 146606826 | HERVHF_5LTR   | - |
| Macaca_mulatta_chr1        | 146607271 | 146610074 | HERVHF_pol    | - |
| Macaca_mulatta_chr1        | 146609670 | 146610413 | HERVHF_pro    | - |
| Macaca_mulatta_chr1        | 146610469 | 146611978 | HERVHF_gag    | - |
| Macaca_mulatta_chr1        | 146613496 | 146613953 | HERVHF_3LTR   | - |
| Macaca_mulatta_chr11       | 39976417  | 39976867  | HERVHF_5LTR   | + |
| Macaca_mulatta_chr11       | 39978766  | 39979107  | HERVHF_gag    | + |
| Macaca_mulatta_chr11       | 39979306  | 39980869  | HERVHF_pol    | + |
| Macaca_mulatta_chr11       | 39981896  | 39982347  | HERVHF_3LTR   | + |
| Macaca_mulatta_chr11       | 66702670  | 66703405  | HERVHF_5LTR   | - |
| Macaca_mulatta_chr11       | 66703741  | 66704520  | HERVHF_pol    | - |

|                      |           |           |             |   |
|----------------------|-----------|-----------|-------------|---|
| Macaca_mulatta_chr11 | 66703978  | 66704763  | HERVHF_pro  | - |
| Macaca_mulatta_chr11 | 66704813  | 66705112  | HERVHF_gag  | - |
| Macaca_mulatta_chr11 | 66711089  | 66711818  | HERVHF_3LTR | - |
| Macaca_mulatta_chr11 | 78193774  | 78194075  | HERVHF_5LTR | - |
| Macaca_mulatta_chr11 | 78194535  | 78196530  | HERVHF_pol  | - |
| Macaca_mulatta_chr11 | 78196538  | 78196870  | HERVHF_pro  | - |
| Macaca_mulatta_chr11 | 78198818  | 78199127  | HERVHF_3LTR | - |
| Macaca_mulatta_chr12 | 75697924  | 75698289  | HERVHF_5LTR | - |
| Macaca_mulatta_chr12 | 75698800  | 75700875  | HERVHF_pol  | - |
| Macaca_mulatta_chr12 | 75701112  | 75701621  | HERVHF_pro  | - |
| Macaca_mulatta_chr12 | 75701665  | 75703110  | HERVHF_gag  | - |
| Macaca_mulatta_chr12 | 75703840  | 75704206  | HERVHF_3LTR | - |
| Macaca_mulatta_chr12 | 115036855 | 115037223 | HERVHF_5LTR | - |
| Macaca_mulatta_chr12 | 115037390 | 115038289 | HERVHF_env  | - |
| Macaca_mulatta_chr12 | 115039141 | 115041517 | HERVHF_pol  | - |
| Macaca_mulatta_chr12 | 115043939 | 115044296 | HERVHF_3LTR | - |
| Macaca_mulatta_chr13 | 43308557  | 43308884  | HERVHF_5LTR | - |
| Macaca_mulatta_chr13 | 43309193  | 43309555  | HERVHF_env  | - |
| Macaca_mulatta_chr13 | 43309848  | 43310549  | HERVHF_pol  | - |
| Macaca_mulatta_chr13 | 43312841  | 43313159  | HERVHF_3LTR | - |
| Macaca_mulatta_chr13 | 52634808  | 52635209  | HERVHF_5LTR | - |
| Macaca_mulatta_chr13 | 52635692  | 52637878  | HERVHF_pol  | - |
| Macaca_mulatta_chr13 | 52637910  | 52638446  | HERVHF_pro  | - |
| Macaca_mulatta_chr13 | 52639500  | 52639889  | HERVHF_3LTR | - |
| Macaca_mulatta_chr13 | 70374180  | 70374551  | HUERSP_5LTR | - |
| Macaca_mulatta_chr13 | 70379567  | 70380249  | HUERSP_pol  | - |
| Macaca_mulatta_chr13 | 70380920  | 70381615  | HUERSP_gag  | - |
| Macaca_mulatta_chr13 | 70383568  | 70383934  | HUERSP_3LTR | - |
| Macaca_mulatta_chr13 | 73754919  | 73755289  | HERVHF_5LTR | + |
| Macaca_mulatta_chr13 | 73756122  | 73757663  | HERVHF_pol  | + |
| Macaca_mulatta_chr13 | 73759451  | 73759814  | HERVHF_3LTR | + |
| Macaca_mulatta_chr13 | 90648541  | 90648900  | HERVHF_5LTR | - |
| Macaca_mulatta_chr13 | 90649365  | 90651831  | HERVHF_pol  | - |
| Macaca_mulatta_chr13 | 90654263  | 90654623  | HERVHF_3LTR | - |
| Macaca_mulatta_chr14 | 34470733  | 34471209  | HERVHF_5LTR | - |
| Macaca_mulatta_chr14 | 34472363  | 34474082  | HERVHF_pol  | - |
| Macaca_mulatta_chr14 | 34473540  | 34474259  | HERVHF_pro  | - |
| Macaca_mulatta_chr14 | 34476326  | 34476799  | HERVHF_3LTR | - |
| Macaca_mulatta_chr14 | 75125086  | 75125438  | HERVHF_5LTR | + |
| Macaca_mulatta_chr14 | 75127345  | 75127905  | HERVHF_gag  | + |
| Macaca_mulatta_chr14 | 75128097  | 75128963  | HERVHF_pro  | + |
| Macaca_mulatta_chr14 | 75128475  | 75128960  | HERVHF_pol  | + |
| Macaca_mulatta_chr14 | 75129894  | 75130253  | HERVHF_env  | + |
| Macaca_mulatta_chr14 | 75131251  | 75131599  | HERVHF_3LTR | + |

|                      |           |           |                |   |
|----------------------|-----------|-----------|----------------|---|
| Macaca_mulatta_chr14 | 97528012  | 97528429  | HERVHF_5LTR    | - |
| Macaca_mulatta_chr14 | 97529522  | 97533187  | HERVHF_pol     | - |
| Macaca_mulatta_chr14 | 97532609  | 97533382  | HERVHF_pro     | - |
| Macaca_mulatta_chr14 | 97533485  | 97534090  | HERVHF_gag     | - |
| Macaca_mulatta_chr14 | 97535543  | 97535961  | HERVHF_3LTR    | - |
| Macaca_mulatta_chr14 | 132484120 | 132484571 | HERVHF_5LTR    | + |
| Macaca_mulatta_chr14 | 132486668 | 132487405 | HERVHF_pro     | + |
| Macaca_mulatta_chr14 | 132487163 | 132488878 | HERVHF_pol     | + |
| Macaca_mulatta_chr14 | 132489377 | 132489836 | HERVHF_3LTR    | + |
| Macaca_mulatta_chr14 | 133267686 | 133267991 | HERVHF_5LTR    | - |
| Macaca_mulatta_chr14 | 133270590 | 133271423 | HERVHF_pol     | - |
| Macaca_mulatta_chr14 | 133270788 | 133271540 | HERVHF_pro     | - |
| Macaca_mulatta_chr14 | 133281071 | 133281389 | HERVHF_3LTR    | - |
| Macaca_mulatta_chr15 | 52258968  | 52259398  | HERVHF_5LTR    | + |
| Macaca_mulatta_chr15 | 52261602  | 52262561  | HERVHF_pro     | + |
| Macaca_mulatta_chr15 | 52261809  | 52263932  | HERVHF_pol     | + |
| Macaca_mulatta_chr15 | 52265189  | 52265616  | HERVHF_3LTR    | + |
| Macaca_mulatta_chr16 | 77862358  | 77862783  | HERVHF_5LTR    | + |
| Macaca_mulatta_chr16 | 77864270  | 77864680  | HERVHF_gag     | + |
| Macaca_mulatta_chr16 | 77865248  | 77867478  | HERVHF_pol     | + |
| Macaca_mulatta_chr16 | 77868786  | 77869598  | HERVHF_env     | + |
| Macaca_mulatta_chr16 | 77869782  | 77870181  | HERVHF_3LTR    | + |
| Macaca_mulatta_chr17 | 5215681   | 5216133   | HERVHF_5LTR    | + |
| Macaca_mulatta_chr17 | 5217602   | 5217988   | HERVHF_gag     | + |
| Macaca_mulatta_chr17 | 5218033   | 5219175   | HERVHF_pro     | + |
| Macaca_mulatta_chr17 | 5218630   | 5220320   | HERVHF_pol     | + |
| Macaca_mulatta_chr17 | 5221476   | 5221924   | HERVHF_3LTR    | + |
| Macaca_mulatta_chr17 | 27963861  | 27964297  | HERVHF_5LTR    | - |
| Macaca_mulatta_chr17 | 27964506  | 27964868  | HERVHF_env     | - |
| Macaca_mulatta_chr17 | 27965514  | 27967464  | HERVHF_pol     | - |
| Macaca_mulatta_chr17 | 27967063  | 27967641  | HERVHF_pro     | - |
| Macaca_mulatta_chr17 | 27967882  | 27968199  | HERVHF_gag     | - |
| Macaca_mulatta_chr17 | 27969702  | 27970134  | HERVHF_3LTR    | - |
| Macaca_mulatta_chr19 | 20690057  | 20690367  | HERVIPADP_5LTR | + |
| Macaca_mulatta_chr19 | 20695184  | 20696105  | HERVIPADP_pol  | + |
| Macaca_mulatta_chr19 | 20704772  | 20705083  | HERVIPADP_3LTR | + |
| Macaca_mulatta_chr19 | 42517110  | 42517469  | HERVHF_5LTR    | - |
| Macaca_mulatta_chr19 | 42518985  | 42522191  | HERVHF_pol     | - |
| Macaca_mulatta_chr19 | 42521652  | 42522191  | HERVHF_pro     | - |
| Macaca_mulatta_chr19 | 42523318  | 42523668  | HERVHF_3LTR    | - |
| Macaca_mulatta_chr2  | 36255765  | 36256214  | HERVHF_5LTR    | + |
| Macaca_mulatta_chr2  | 36257936  | 36258259  | HERVHF_gag     | + |
| Macaca_mulatta_chr2  | 36258419  | 36259084  | HERVHF_pro     | + |
| Macaca_mulatta_chr2  | 36258452  | 36260196  | HERVHF_pol     | + |

|                     |           |           |                |   |
|---------------------|-----------|-----------|----------------|---|
| Macaca_mulatta_chr2 | 36260891  | 36261343  | HERVHF_3LTR    | + |
| Macaca_mulatta_chr2 | 62284717  | 62285151  | HERVHF_5LTR    | + |
| Macaca_mulatta_chr2 | 62287550  | 62289778  | HERVHF_pol     | + |
| Macaca_mulatta_chr2 | 62290219  | 62290653  | HERVHF_3LTR    | + |
| Macaca_mulatta_chr2 | 125044762 | 125045148 | HERVHF_5LTR    | - |
| Macaca_mulatta_chr2 | 125045322 | 125046495 | HERVHF_env     | - |
| Macaca_mulatta_chr2 | 125047345 | 125050247 | HERVHF_pol     | - |
| Macaca_mulatta_chr2 | 125050303 | 125050827 | HERVHF_pro     | - |
| Macaca_mulatta_chr2 | 125051000 | 125051491 | HERVHF_gag     | - |
| Macaca_mulatta_chr2 | 125053176 | 125053572 | HERVHF_3LTR    | - |
| Macaca_mulatta_chr2 | 180984912 | 180985220 | HERVHF_5LTR    | + |
| Macaca_mulatta_chr2 | 180986630 | 180987064 | HERVHF_gag     | + |
| Macaca_mulatta_chr2 | 180987368 | 180989567 | HERVHF_pol     | + |
| Macaca_mulatta_chr2 | 180989684 | 180990250 | HERVHF_env     | + |
| Macaca_mulatta_chr2 | 180990541 | 180990852 | HERVHF_3LTR    | + |
| Macaca_mulatta_chr3 | 119955655 | 119956070 | HERVHF_5LTR    | - |
| Macaca_mulatta_chr3 | 119957284 | 119959762 | HERVHF_pol     | - |
| Macaca_mulatta_chr3 | 119959220 | 119959924 | HERVHF_pro     | - |
| Macaca_mulatta_chr3 | 119962321 | 119962727 | HERVHF_3LTR    | - |
| Macaca_mulatta_chr3 | 181806972 | 181807314 | HERVHF_5LTR    | - |
| Macaca_mulatta_chr3 | 181807582 | 181810089 | HERVHF_pol     | - |
| Macaca_mulatta_chr3 | 181809807 | 181810406 | HERVHF_pro     | - |
| Macaca_mulatta_chr3 | 181810520 | 181810867 | HERVHF_gag     | - |
| Macaca_mulatta_chr3 | 181812251 | 181812586 | HERVHF_3LTR    | - |
| Macaca_mulatta_chr4 | 2919612   | 2919912   | HERVHF_5LTR    | + |
| Macaca_mulatta_chr4 | 2924631   | 2926753   | HERVHF_pol     | + |
| Macaca_mulatta_chr4 | 2933364   | 2933671   | HERVHF_3LTR    | + |
| Macaca_mulatta_chr4 | 21281230  | 21281635  | HERVIPADP_5LTR | - |
| Macaca_mulatta_chr4 | 21281983  | 21282369  | HERVIPADP_env  | - |
| Macaca_mulatta_chr4 | 21284300  | 21287455  | HERVIPADP_pol  | - |
| Macaca_mulatta_chr4 | 21288306  | 21288683  | HERVIPADP_gag  | - |
| Macaca_mulatta_chr4 | 21290134  | 21290544  | HERVIPADP_3LTR | - |
| Macaca_mulatta_chr4 | 67466998  | 67467362  | HERVHF_5LTR    | - |
| Macaca_mulatta_chr4 | 67467509  | 67468023  | HERVHF_env     | - |
| Macaca_mulatta_chr4 | 67469835  | 67472270  | HERVHF_pol     | - |
| Macaca_mulatta_chr4 | 67473165  | 67473947  | HERVHF_gag     | - |
| Macaca_mulatta_chr4 | 67475073  | 67475449  | HERVHF_3LTR    | - |
| Macaca_mulatta_chr5 | 11335481  | 11335887  | HERVHF_5LTR    | - |
| Macaca_mulatta_chr5 | 11336531  | 11338226  | HERVHF_pol     | - |
| Macaca_mulatta_chr5 | 11338655  | 11338972  | HERVHF_gag     | - |
| Macaca_mulatta_chr5 | 11340593  | 11341006  | HERVHF_3LTR    | - |
| Macaca_mulatta_chr5 | 42988418  | 42988808  | HERVHF_5LTR    | + |
| Macaca_mulatta_chr5 | 42989994  | 42990308  | HERVHF_gag     | + |
| Macaca_mulatta_chr5 | 42990684  | 42991388  | HERVHF_pro     | + |

|                     |           |           |             |   |
|---------------------|-----------|-----------|-------------|---|
| Macaca_mulatta_chr5 | 42991017  | 42993118  | HERVHF_pol  | + |
| Macaca_mulatta_chr5 | 42993913  | 42994304  | HERVHF_3LTR | + |
| Macaca_mulatta_chr5 | 141172261 | 141172733 | HERVHF_5LTR | - |
| Macaca_mulatta_chr5 | 141173564 | 141175185 | HERVHF_pol  | - |
| Macaca_mulatta_chr5 | 141177452 | 141177923 | HERVHF_3LTR | - |
| Macaca_mulatta_chr5 | 186492672 | 186493039 | HERVHF_5LTR | - |
| Macaca_mulatta_chr5 | 186493469 | 186495697 | HERVHF_pol  | - |
| Macaca_mulatta_chr5 | 186495269 | 186496063 | HERVHF_pro  | - |
| Macaca_mulatta_chr5 | 186496149 | 186496460 | HERVHF_gag  | - |
| Macaca_mulatta_chr5 | 186497908 | 186498275 | HERVHF_3LTR | - |
| Macaca_mulatta_chr6 | 86308447  | 86308892  | HERVHF_5LTR | + |
| Macaca_mulatta_chr6 | 86311031  | 86311363  | HERVHF_pro  | + |
| Macaca_mulatta_chr6 | 86311378  | 86313106  | HERVHF_pol  | + |
| Macaca_mulatta_chr6 | 86313719  | 86314159  | HERVHF_3LTR | + |
| Macaca_mulatta_chr6 | 93303323  | 93303627  | HERVHF_5LTR | + |
| Macaca_mulatta_chr6 | 93306241  | 93307806  | HERVHF_pol  | + |
| Macaca_mulatta_chr6 | 93308645  | 93308955  | HERVHF_3LTR | + |
| Macaca_mulatta_chr6 | 118193296 | 118193624 | HERVHF_5LTR | - |
| Macaca_mulatta_chr6 | 118193790 | 118194221 | HERVHF_env  | - |
| Macaca_mulatta_chr6 | 118195248 | 118197529 | HERVHF_pol  | - |
| Macaca_mulatta_chr6 | 118198462 | 118198947 | HERVHF_gag  | - |
| Macaca_mulatta_chr6 | 118200214 | 118200548 | HERVHF_3LTR | - |
| Macaca_mulatta_chr6 | 137597040 | 137597491 | HERVHF_5LTR | - |
| Macaca_mulatta_chr6 | 137598716 | 137600388 | HERVHF_pol  | - |
| Macaca_mulatta_chr6 | 137599960 | 137600631 | HERVHF_pro  | - |
| Macaca_mulatta_chr6 | 137600835 | 137601137 | HERVHF_gag  | - |
| Macaca_mulatta_chr6 | 137602761 | 137603208 | HERVHF_3LTR | - |
| Macaca_mulatta_chr6 | 171984233 | 171984584 | HERVHF_5LTR | - |
| Macaca_mulatta_chr6 | 171986152 | 171987840 | HERVHF_pol  | - |
| Macaca_mulatta_chr6 | 171987617 | 171988033 | HERVHF_pro  | - |
| Macaca_mulatta_chr6 | 171988165 | 171988755 | HERVHF_gag  | - |
| Macaca_mulatta_chr6 | 171990359 | 171990708 | HERVHF_3LTR | - |
| Macaca_mulatta_chr7 | 63140288  | 63140679  | HERVHF_5LTR | + |
| Macaca_mulatta_chr7 | 63142269  | 63142592  | HERVHF_gag  | + |
| Macaca_mulatta_chr7 | 63142703  | 63143443  | HERVHF_pro  | + |
| Macaca_mulatta_chr7 | 63142784  | 63145047  | HERVHF_pol  | + |
| Macaca_mulatta_chr7 | 63145868  | 63146268  | HERVHF_3LTR | + |
| Macaca_mulatta_chr7 | 100629550 | 100630001 | HERVHF_5LTR | - |
| Macaca_mulatta_chr7 | 100630472 | 100632200 | HERVHF_pol  | - |
| Macaca_mulatta_chr7 | 100631658 | 100632449 | HERVHF_pro  | - |
| Macaca_mulatta_chr7 | 100632546 | 100633010 | HERVHF_gag  | - |
| Macaca_mulatta_chr7 | 100634531 | 100634985 | HERVHF_3LTR | - |
| Macaca_mulatta_chr7 | 139543044 | 139543355 | HERVHF_5LTR | - |
| Macaca_mulatta_chr7 | 139544033 | 139546099 | HERVHF_pol  | - |

|                              |           |           |               |   |
|------------------------------|-----------|-----------|---------------|---|
| Macaca_mulatta_chr7          | 139545567 | 139546412 | HERVHF_pro    | - |
| Macaca_mulatta_chr7          | 139546773 | 139547297 | HERVHF_gag    | - |
| Macaca_mulatta_chr7          | 139548665 | 139548972 | HERVHF_3LTR   | - |
| Macaca_mulatta_chr7          | 150331994 | 150332395 | HERVHF_5LTR   | - |
| Macaca_mulatta_chr7          | 150332985 | 150335407 | HERVHF_pol    | - |
| Macaca_mulatta_chr7          | 150334865 | 150335707 | HERVHF_pro    | - |
| Macaca_mulatta_chr7          | 150335709 | 150336071 | HERVHF_gag    | - |
| Macaca_mulatta_chr7          | 150337545 | 150337936 | HERVHF_3LTR   | - |
| Macaca_mulatta_chr8          | 54671394  | 54671707  | HSERVIII_5LTR | - |
| Macaca_mulatta_chr8          | 54677195  | 54677794  | HSERVIII_pol  | - |
| Macaca_mulatta_chr8          | 54680263  | 54680568  | HSERVIII_3LTR | - |
| Macaca_mulatta_chr8          | 55621170  | 55621559  | HSERVIII_5LTR | + |
| Macaca_mulatta_chr8          | 55623411  | 55623827  | HSERVIII_pol  | + |
| Macaca_mulatta_chr8          | 55626655  | 55627047  | HSERVIII_3LTR | + |
| Macaca_mulatta_chr8          | 90801928  | 90802346  | HERVHF_5LTR   | - |
| Macaca_mulatta_chr8          | 90802983  | 90805564  | HERVHF_pol    | - |
| Macaca_mulatta_chr8          | 90805255  | 90806061  | HERVHF_pro    | - |
| Macaca_mulatta_chr8          | 90806066  | 90806422  | HERVHF_gag    | - |
| Macaca_mulatta_chr8          | 90807904  | 90808315  | HERVHF_3LTR   | - |
| Macaca_mulatta_chr9          | 36667215  | 36667578  | HERVHF_5LTR   | + |
| Macaca_mulatta_chr9          | 36669139  | 36669438  | HERVHF_gag    | + |
| Macaca_mulatta_chr9          | 36669912  | 36670618  | HERVHF_pol    | + |
| Macaca_mulatta_chr9          | 36671457  | 36671819  | HERVHF_3LTR   | + |
| Macaca_mulatta_chrX          | 37880884  | 37881317  | HERVHF_5LTR   | - |
| Macaca_mulatta_chrX          | 37882754  | 37885029  | HERVHF_pol    | - |
| Macaca_mulatta_chrX          | 37885376  | 37885810  | HERVHF_gag    | - |
| Macaca_mulatta_chrX          | 37887170  | 37887592  | HERVHF_3LTR   | - |
| Macaca_mulatta_chrX          | 71555472  | 71555850  | HERVHF_5LTR   | - |
| Macaca_mulatta_chrX          | 71556015  | 71556356  | HERVHF_env    | - |
| Macaca_mulatta_chrX          | 71557751  | 71559238  | HERVHF_pol    | - |
| Macaca_mulatta_chrX          | 71559463  | 71559774  | HERVHF_gag    | - |
| Macaca_mulatta_chrX          | 71561127  | 71561505  | HERVHF_3LTR   | - |
| Macaca_mulatta_chrX          | 99079355  | 99079748  | HERVHF_5LTR   | - |
| Macaca_mulatta_chrX          | 99079913  | 99080491  | HERVHF_env    | - |
| Macaca_mulatta_chrX          | 99081153  | 99083276  | HERVHF_pol    | - |
| Macaca_mulatta_chrX          | 99082632  | 99083411  | HERVHF_pro    | - |
| Macaca_mulatta_chrX          | 99083441  | 99083827  | HERVHF_gag    | - |
| Macaca_mulatta_chrX          | 99085273  | 99085648  | HERVHF_3LTR   | - |
| Macaca_mulatta_chrY          | 6381051   | 6381443   | HERVHF_5LTR   | - |
| Macaca_mulatta_chrY          | 6382969   | 6384479   | HERVHF_pol    | - |
| Macaca_mulatta_chrY          | 6384488   | 6384919   | HERVHF_pro    | - |
| Macaca_mulatta_chrY          | 6387355   | 6387749   | HERVHF_3LTR   | - |
| Macaca_nemestrina_KQ004642.1 | 3511742   | 3512161   | HERVK_5LTR    | + |
| Macaca_nemestrina_KQ004642.1 | 3512935   | 3513564   | HERVK_pro     | + |

|                              |          |          |             |   |
|------------------------------|----------|----------|-------------|---|
| Macaca_nemestrina_KQ004642.1 | 3513654  | 3514523  | HERVK_pol   | + |
| Macaca_nemestrina_KQ004642.1 | 3515418  | 3515729  | HERVK_env   | + |
| Macaca_nemestrina_KQ004642.1 | 3515804  | 3516223  | HERVK_3LTR  | + |
| Macaca_nemestrina_KQ004731.1 | 4552548  | 4552871  | HERVK_5LTR  | - |
| Macaca_nemestrina_KQ004731.1 | 4553722  | 4555021  | HERVK_pol   | - |
| Macaca_nemestrina_KQ004731.1 | 4554889  | 4555689  | HERVK_pro   | - |
| Macaca_nemestrina_KQ004731.1 | 4556897  | 4557221  | HERVK_3LTR  | - |
| Macaca_nemestrina_KQ004775.1 | 364425   | 364939   | HERVK_5LTR  | + |
| Macaca_nemestrina_KQ004775.1 | 366504   | 367013   | HERVK_pro   | + |
| Macaca_nemestrina_KQ004775.1 | 367156   | 368690   | HERVK_pol   | + |
| Macaca_nemestrina_KQ004775.1 | 369586   | 370102   | HERVK_3LTR  | + |
| Macaca_nemestrina_KQ004830.1 | 4877838  | 4878352  | HERVK_5LTR  | - |
| Macaca_nemestrina_KQ004830.1 | 4878431  | 4878936  | HERVK_env   | - |
| Macaca_nemestrina_KQ004830.1 | 4880150  | 4881283  | HERVK_pol   | - |
| Macaca_nemestrina_KQ004830.1 | 4881037  | 4881784  | HERVK_pro   | - |
| Macaca_nemestrina_KQ004830.1 | 4882424  | 4882924  | HERVK_gag   | - |
| Macaca_nemestrina_KQ004830.1 | 4883310  | 4883818  | HERVK_3LTR  | - |
| Macaca_nemestrina_KQ004830.1 | 36416926 | 36417436 | HERVK_5LTR  | + |
| Macaca_nemestrina_KQ004830.1 | 36418893 | 36419807 | HERVK_pro   | + |
| Macaca_nemestrina_KQ004830.1 | 36419702 | 36420971 | HERVK_pol   | + |
| Macaca_nemestrina_KQ004830.1 | 36421896 | 36422409 | HERVK_3LTR  | + |
| Macaca_nemestrina_KQ005050.1 | 16516198 | 16516539 | HERVK_5LTR  | + |
| Macaca_nemestrina_KQ005050.1 | 16517525 | 16518064 | HERVK_gag   | + |
| Macaca_nemestrina_KQ005050.1 | 16518139 | 16518804 | HERVK_pro   | + |
| Macaca_nemestrina_KQ005050.1 | 16518896 | 16519690 | HERVK_pol   | + |
| Macaca_nemestrina_KQ005050.1 | 16520708 | 16521036 | HERVK_3LTR  | + |
| Macaca_nemestrina_KQ005701.1 | 25097569 | 25097980 | HERVHF_5LTR | + |
| Macaca_nemestrina_KQ005701.1 | 25099022 | 25099534 | HERVHF_gag  | + |
| Macaca_nemestrina_KQ005701.1 | 25099797 | 25102537 | HERVHF_pol  | + |
| Macaca_nemestrina_KQ005701.1 | 25103905 | 25104955 | HERVHF_env  | + |
| Macaca_nemestrina_KQ005701.1 | 25105310 | 25105713 | HERVHF_3LTR | + |
| Macaca_nemestrina_KQ005769.1 | 740973   | 741430   | HERVK_5LTR  | - |
| Macaca_nemestrina_KQ005769.1 | 742917   | 744477   | HERVK_pol   | - |
| Macaca_nemestrina_KQ005769.1 | 744396   | 745016   | HERVK_pro   | - |
| Macaca_nemestrina_KQ005769.1 | 745171   | 745926   | HERVK_gag   | - |
| Macaca_nemestrina_KQ005769.1 | 746755   | 747226   | HERVK_3LTR  | - |
| Macaca_nemestrina_KQ005879.1 | 2802914  | 2803431  | HERVK_5LTR  | - |
| Macaca_nemestrina_KQ005879.1 | 2803436  | 2803911  | HERVK_env   | - |
| Macaca_nemestrina_KQ005879.1 | 2804595  | 2806202  | HERVK_pol   | - |
| Macaca_nemestrina_KQ005879.1 | 2806391  | 2807068  | HERVK_pro   | - |
| Macaca_nemestrina_KQ005879.1 | 2807940  | 2808447  | HERVK_3LTR  | - |
| Macaca_nemestrina_KQ005912.1 | 1957251  | 1957629  | HERVHF_5LTR | + |
| Macaca_nemestrina_KQ005912.1 | 1958841  | 1959284  | HERVHF_gag  | + |
| Macaca_nemestrina_KQ005912.1 | 1959521  | 1961014  | HERVHF_pol  | + |



|                              |          |          |                |   |
|------------------------------|----------|----------|----------------|---|
| Macaca_nemestrina_KQ005912.1 | 1962400  | 1962750  | HERVHF_env     | + |
| Macaca_nemestrina_KQ005912.1 | 1962913  | 1963291  | HERVHF_3LTR    | + |
| Macaca_nemestrina_KQ006137.1 | 362956   | 363349   | HERVIPADP_5LTR | - |
| Macaca_nemestrina_KQ006137.1 | 365952   | 368613   | HERVIPADP_pol  | - |
| Macaca_nemestrina_KQ006137.1 | 369039   | 369395   | HERVIPADP_gag  | - |
| Macaca_nemestrina_KQ006137.1 | 371271   | 371668   | HERVIPADP_3LTR | - |
| Macaca_nemestrina_KQ006343.1 | 9916420  | 9916748  | HERVHF_5LTR    | - |
| Macaca_nemestrina_KQ006343.1 | 9916914  | 9917414  | HERVHF_env     | - |
| Macaca_nemestrina_KQ006343.1 | 9918372  | 9920869  | HERVHF_pol     | - |
| Macaca_nemestrina_KQ006343.1 | 9921929  | 9922390  | HERVHF_gag     | - |
| Macaca_nemestrina_KQ006343.1 | 9923657  | 9923991  | HERVHF_3LTR    | - |
| Macaca_nemestrina_KQ006601.1 | 11491    | 11805    | HERVHF_5LTR    | + |
| Macaca_nemestrina_KQ006601.1 | 13277    | 13618    | HERVHF_gag     | + |
| Macaca_nemestrina_KQ006601.1 | 13652    | 14365    | HERVHF_pro     | + |
| Macaca_nemestrina_KQ006601.1 | 13816    | 16168    | HERVHF_pol     | + |
| Macaca_nemestrina_KQ006601.1 | 16735    | 17041    | HERVHF_3LTR    | + |
| Macaca_nemestrina_KQ006730.1 | 38302652 | 38303022 | HUERSP_5LTR    | - |
| Macaca_nemestrina_KQ006730.1 | 38308005 | 38308705 | HUERSP_pol     | - |
| Macaca_nemestrina_KQ006730.1 | 38312051 | 38312416 | HUERSP_3LTR    | - |
| Macaca_nemestrina_KQ007533.1 | 4314931  | 4315256  | HERVHF_5LTR    | - |
| Macaca_nemestrina_KQ007533.1 | 4316007  | 4318339  | HERVHF_pol     | - |
| Macaca_nemestrina_KQ007533.1 | 4317791  | 4318711  | HERVHF_pro     | - |
| Macaca_nemestrina_KQ007533.1 | 4318776  | 4319584  | HERVHF_gag     | - |
| Macaca_nemestrina_KQ007533.1 | 4320945  | 4321282  | HERVHF_3LTR    | - |
| Macaca_nemestrina_KQ009049.1 | 13204873 | 13205182 | HSERVIII_5LTR  | - |
| Macaca_nemestrina_KQ009049.1 | 13206149 | 13208867 | HSERVIII_pol   | - |
| Macaca_nemestrina_KQ009049.1 | 13210870 | 13211179 | HSERVIII_3LTR  | - |
| Macaca_nemestrina_KQ009060.1 | 3896265  | 3896776  | HERVK_5LTR     | - |
| Macaca_nemestrina_KQ009060.1 | 3896855  | 3897187  | HERVK_env      | - |
| Macaca_nemestrina_KQ009060.1 | 3898068  | 3898922  | HERVK_pol      | - |
| Macaca_nemestrina_KQ009060.1 | 3898817  | 3899582  | HERVK_pro      | - |
| Macaca_nemestrina_KQ009060.1 | 3899703  | 3900644  | HERVK_gag      | - |
| Macaca_nemestrina_KQ009060.1 | 3901127  | 3901647  | HERVK_3LTR     | - |
| Macaca_nemestrina_KQ009060.1 | 13107717 | 13108172 | HERVK_5LTR     | + |
| Macaca_nemestrina_KQ009060.1 | 13108925 | 13110391 | HERVK_pro      | + |
| Macaca_nemestrina_KQ009060.1 | 13110286 | 13112034 | HERVK_pol      | + |
| Macaca_nemestrina_KQ009060.1 | 13112725 | 13113036 | HERVK_env      | + |
| Macaca_nemestrina_KQ009060.1 | 13113151 | 13113623 | HERVK_3LTR     | + |
| Macaca_nemestrina_KQ009172.1 | 10328302 | 10328773 | HERVK_5LTR     | - |
| Macaca_nemestrina_KQ009172.1 | 10328872 | 10329219 | HERVK_env      | - |
| Macaca_nemestrina_KQ009172.1 | 10329719 | 10331020 | HERVK_pol      | - |
| Macaca_nemestrina_KQ009172.1 | 10330891 | 10331912 | HERVK_pro      | - |
| Macaca_nemestrina_KQ009172.1 | 10333877 | 10334415 | HERVK_gag      | - |
| Macaca_nemestrina_KQ009172.1 | 10334828 | 10335304 | HERVK_3LTR     | - |

|                              |          |          |                |   |
|------------------------------|----------|----------|----------------|---|
| Macaca_nemestrina_KQ009183.1 | 1944392  | 1944751  | HERVHF_5LTR    | - |
| Macaca_nemestrina_KQ009183.1 | 1946578  | 1949547  | HERVHF_pol     | - |
| Macaca_nemestrina_KQ009183.1 | 1949008  | 1949547  | HERVHF_pro     | - |
| Macaca_nemestrina_KQ009183.1 | 1950675  | 1951025  | HERVHF_3LTR    | - |
| Macaca_nemestrina_KQ009282.1 | 19313992 | 19314302 | HERVHF_5LTR    | - |
| Macaca_nemestrina_KQ009282.1 | 19319328 | 19322359 | HERVHF_pol     | - |
| Macaca_nemestrina_KQ009282.1 | 19322030 | 19323328 | HERVHF_pro     | - |
| Macaca_nemestrina_KQ009282.1 | 19323697 | 19324464 | HERVHF_gag     | - |
| Macaca_nemestrina_KQ009282.1 | 19324746 | 19325049 | HERVHF_3LTR    | - |
| Macaca_nemestrina_KQ009403.1 | 1801844  | 1802176  | HERVK_5LTR     | - |
| Macaca_nemestrina_KQ009403.1 | 1806312  | 1806791  | HERVK_pol      | - |
| Macaca_nemestrina_KQ009403.1 | 1806791  | 1807765  | HERVK_pro      | - |
| Macaca_nemestrina_KQ009403.1 | 1808954  | 1809283  | HERVK_3LTR     | - |
| Macaca_nemestrina_KQ009425.1 | 11080775 | 11081256 | HERVK_5LTR     | + |
| Macaca_nemestrina_KQ009425.1 | 11082202 | 11083101 | HERVK_pro      | + |
| Macaca_nemestrina_KQ009425.1 | 11083002 | 11084908 | HERVK_pol      | + |
| Macaca_nemestrina_KQ009425.1 | 11085850 | 11086327 | HERVK_3LTR     | + |
| Macaca_silenus_Contig10      | 2262868  | 2263178  | HERVHF_5LTR    | - |
| Macaca_silenus_Contig10      | 2264019  | 2265584  | HERVHF_pol     | - |
| Macaca_silenus_Contig10      | 2268029  | 2268335  | HERVHF_3LTR    | - |
| Macaca_silenus_Contig10      | 22453192 | 22453502 | HSERVIII_5LTR  | - |
| Macaca_silenus_Contig10      | 22454483 | 22457090 | HSERVIII_pol   | - |
| Macaca_silenus_Contig10      | 22459248 | 22459557 | HSERVIII_3LTR  | - |
| Macaca_silenus_Contig11      | 12182542 | 12183045 | HERVK_5LTR     | - |
| Macaca_silenus_Contig11      | 12183124 | 12183474 | HERVK_env      | - |
| Macaca_silenus_Contig11      | 12184302 | 12185976 | HERVK_pol      | - |
| Macaca_silenus_Contig11      | 12186085 | 12186477 | HERVK_pro      | - |
| Macaca_silenus_Contig11      | 12187129 | 12187590 | HERVK_gag      | - |
| Macaca_silenus_Contig11      | 12188009 | 12188512 | HERVK_3LTR     | - |
| Macaca_silenus_Contig11      | 43157129 | 43157639 | HERVK_5LTR     | + |
| Macaca_silenus_Contig11      | 43159096 | 43160010 | HERVK_pro      | + |
| Macaca_silenus_Contig11      | 43159905 | 43161174 | HERVK_pol      | + |
| Macaca_silenus_Contig11      | 43162099 | 43162610 | HERVK_3LTR     | + |
| Macaca_silenus_Contig110     | 3133639  | 3134001  | HERVHF_5LTR    | - |
| Macaca_silenus_Contig110     | 3135039  | 3135554  | HERVHF_pol     | - |
| Macaca_silenus_Contig110     | 3136028  | 3136633  | HERVHF_gag     | - |
| Macaca_silenus_Contig110     | 3137886  | 3138249  | HERVHF_3LTR    | - |
| Macaca_silenus_Contig142     | 1256819  | 1257260  | HERVHF_5LTR    | + |
| Macaca_silenus_Contig142     | 1258752  | 1259072  | HERVHF_gag     | + |
| Macaca_silenus_Contig142     | 1259062  | 1259598  | HERVHF_pro     | + |
| Macaca_silenus_Contig142     | 1259484  | 1261247  | HERVHF_pol     | + |
| Macaca_silenus_Contig142     | 1261982  | 1262427  | HERVHF_3LTR    | + |
| Macaca_silenus_Contig15      | 19035196 | 19035500 | HERVIPADP_5LTR | - |
| Macaca_silenus_Contig15      | 19038076 | 19038621 | HERVIPADP_env  | - |

|                          |          |          |                |   |
|--------------------------|----------|----------|----------------|---|
| Macaca_silenus_Contig15  | 19043180 | 19046385 | HERVIPADP_pol  | - |
| Macaca_silenus_Contig15  | 19047034 | 19047390 | HERVIPADP_gag  | - |
| Macaca_silenus_Contig15  | 19049171 | 19049478 | HERVIPADP_3LTR | - |
| Macaca_silenus_Contig155 | 2302348  | 2302671  | HERVK_5LTR     | - |
| Macaca_silenus_Contig155 | 2303587  | 2304886  | HERVK_pol      | - |
| Macaca_silenus_Contig155 | 2304754  | 2305554  | HERVK_pro      | - |
| Macaca_silenus_Contig155 | 2306762  | 2307086  | HERVK_3LTR     | - |
| Macaca_silenus_Contig16  | 8080658  | 8081075  | HERVHF_5LTR    | - |
| Macaca_silenus_Contig16  | 8081934  | 8086360  | HERVHF_pol     | - |
| Macaca_silenus_Contig16  | 8085755  | 8086555  | HERVHF_pro     | - |
| Macaca_silenus_Contig16  | 8086658  | 8087191  | HERVHF_gag     | - |
| Macaca_silenus_Contig16  | 8088716  | 8089133  | HERVHF_3LTR    | - |
| Macaca_silenus_Contig18  | 5888165  | 5888469  | HSERVIII_5LTR  | - |
| Macaca_silenus_Contig18  | 5893989  | 5894588  | HSERVIII_pol   | - |
| Macaca_silenus_Contig18  | 5901352  | 5901666  | HSERVIII_3LTR  | - |
| Macaca_silenus_Contig188 | 269639   | 269942   | HSERVIII_5LTR  | - |
| Macaca_silenus_Contig188 | 274767   | 275432   | HSERVIII_pol   | - |
| Macaca_silenus_Contig188 | 283861   | 284172   | HSERVIII_3LTR  | - |
| Macaca_silenus_Contig2   | 566008   | 566372   | HERVHF_5LTR    | - |
| Macaca_silenus_Contig2   | 567256   | 569705   | HERVHF_pol     | - |
| Macaca_silenus_Contig2   | 569163   | 569903   | HERVHF_pro     | - |
| Macaca_silenus_Contig2   | 570536   | 570906   | HERVHF_3LTR    | - |
| Macaca_silenus_Contig2   | 3974013  | 3974377  | HUERSP_5LTR    | + |
| Macaca_silenus_Contig2   | 3976371  | 3977027  | HUERSP_gag     | + |
| Macaca_silenus_Contig2   | 3977698  | 3978425  | HUERSP_pol     | + |
| Macaca_silenus_Contig2   | 3983385  | 3983756  | HUERSP_3LTR    | + |
| Macaca_silenus_Contig2   | 11818749 | 11819508 | HERVHF_5LTR    | + |
| Macaca_silenus_Contig2   | 11821403 | 11821708 | HERVHF_gag     | + |
| Macaca_silenus_Contig2   | 11821957 | 11822538 | HERVHF_pro     | + |
| Macaca_silenus_Contig2   | 11822182 | 11824046 | HERVHF_pol     | + |
| Macaca_silenus_Contig2   | 11824319 | 11825079 | HERVHF_3LTR    | + |
| Macaca_silenus_Contig2   | 30989672 | 30989990 | HERVHF_5LTR    | + |
| Macaca_silenus_Contig2   | 30992230 | 30992988 | HERVHF_pol     | + |
| Macaca_silenus_Contig2   | 30993277 | 30993639 | HERVHF_env     | + |
| Macaca_silenus_Contig2   | 30993928 | 30994254 | HERVHF_3LTR    | + |
| Macaca_silenus_Contig20  | 3858886  | 3859277  | HERVHF_5LTR    | + |
| Macaca_silenus_Contig20  | 3860754  | 3861074  | HERVHF_gag     | + |
| Macaca_silenus_Contig20  | 3861118  | 3861957  | HERVHF_pro     | + |
| Macaca_silenus_Contig20  | 3861583  | 3863837  | HERVHF_pol     | + |
| Macaca_silenus_Contig20  | 3864425  | 3864826  | HERVHF_3LTR    | + |
| Macaca_silenus_Contig225 | 701486   | 701886   | HERVHF_5LTR    | - |
| Macaca_silenus_Contig225 | 702726   | 704971   | HERVHF_pol     | - |
| Macaca_silenus_Contig225 | 704333   | 705064   | HERVHF_pro     | - |
| Macaca_silenus_Contig225 | 705163   | 705504   | HERVHF_gag     | - |

|                          |          |          |             |   |
|--------------------------|----------|----------|-------------|---|
| Macaca_silenus_Contig225 | 707054   | 707445   | HERVHF_3LTR | - |
| Macaca_silenus_Contig263 | 617428   | 617769   | HERVK_5LTR  | - |
| Macaca_silenus_Contig263 | 618038   | 618622   | HERVK_env   | - |
| Macaca_silenus_Contig263 | 618728   | 619994   | HERVK_pol   | - |
| Macaca_silenus_Contig263 | 619889   | 620826   | HERVK_pro   | - |
| Macaca_silenus_Contig263 | 622296   | 622640   | HERVK_3LTR  | - |
| Macaca_silenus_Contig27  | 10436659 | 10436968 | HERVHF_5LTR | + |
| Macaca_silenus_Contig27  | 10438291 | 10438722 | HERVHF_gag  | + |
| Macaca_silenus_Contig27  | 10438771 | 10439614 | HERVHF_pro  | + |
| Macaca_silenus_Contig27  | 10439207 | 10441422 | HERVHF_pol  | + |
| Macaca_silenus_Contig27  | 10441554 | 10441855 | HERVHF_3LTR | + |
| Macaca_silenus_Contig27  | 22006808 | 22007537 | HERVHF_5LTR | + |
| Macaca_silenus_Contig27  | 22013504 | 22013824 | HERVHF_gag  | + |
| Macaca_silenus_Contig27  | 22013877 | 22014656 | HERVHF_pro  | + |
| Macaca_silenus_Contig27  | 22014075 | 22014827 | HERVHF_pol  | + |
| Macaca_silenus_Contig27  | 22015227 | 22015962 | HERVHF_3LTR | + |
| Macaca_silenus_Contig35  | 9485530  | 9486041  | HERVK_5LTR  | - |
| Macaca_silenus_Contig35  | 9486120  | 9486431  | HERVK_env   | - |
| Macaca_silenus_Contig35  | 9487453  | 9488187  | HERVK_pol   | - |
| Macaca_silenus_Contig35  | 9488091  | 9488847  | HERVK_pro   | - |
| Macaca_silenus_Contig35  | 9489142  | 9490017  | HERVK_gag   | - |
| Macaca_silenus_Contig35  | 9490392  | 9490912  | HERVK_3LTR  | - |
| Macaca_silenus_Contig35  | 18445883 | 18446360 | HERVK_5LTR  | + |
| Macaca_silenus_Contig35  | 18447113 | 18448054 | HERVK_pro   | + |
| Macaca_silenus_Contig35  | 18447952 | 18449865 | HERVK_pol   | + |
| Macaca_silenus_Contig35  | 18450388 | 18450699 | HERVK_env   | + |
| Macaca_silenus_Contig35  | 18450797 | 18451287 | HERVK_3LTR  | + |
| Macaca_silenus_Contig42  | 370360   | 370825   | HERVHF_5LTR | + |
| Macaca_silenus_Contig42  | 372940   | 374698   | HERVHF_pol  | + |
| Macaca_silenus_Contig42  | 375529   | 376000   | HERVHF_3LTR | + |
| Macaca_silenus_Contig46  | 9533334  | 9533713  | HERVHF_5LTR | + |
| Macaca_silenus_Contig46  | 9535966  | 9537999  | HERVHF_pol  | + |
| Macaca_silenus_Contig46  | 9538359  | 9538724  | HERVHF_env  | + |
| Macaca_silenus_Contig46  | 9538942  | 9539315  | HERVHF_3LTR | + |
| Macaca_silenus_Contig5   | 29571001 | 29571341 | HERVK_5LTR  | - |
| Macaca_silenus_Contig5   | 29572422 | 29574334 | HERVK_pol   | - |
| Macaca_silenus_Contig5   | 29574241 | 29575128 | HERVK_pro   | - |
| Macaca_silenus_Contig5   | 29576072 | 29576428 | HERVK_3LTR  | - |
| Macaca_silenus_Contig56  | 13526073 | 13526503 | HERVHF_5LTR | + |
| Macaca_silenus_Contig56  | 13528656 | 13530865 | HERVHF_pol  | + |
| Macaca_silenus_Contig56  | 13531625 | 13532056 | HERVHF_3LTR | + |
| Macaca_silenus_Contig57  | 2852834  | 2853135  | HERVHF_5LTR | - |
| Macaca_silenus_Contig57  | 2853431  | 2853928  | HERVHF_env  | - |
| Macaca_silenus_Contig57  | 2855545  | 2858055  | HERVHF_pol  | - |

|                                    |          |          |               |   |
|------------------------------------|----------|----------|---------------|---|
| Macaca_silenus_Contig57            | 2857498  | 2858298  | HERVHF_pro    | - |
| Macaca_silenus_Contig57            | 2858708  | 2859286  | HERVHF_gag    | - |
| Macaca_silenus_Contig57            | 2860508  | 2860807  | HERVHF_3LTR   | - |
| Macaca_silenus_Contig64            | 6682435  | 6683283  | HERVHF_5LTR   | + |
| Macaca_silenus_Contig64            | 6683388  | 6684185  | HERVHF_pro    | + |
| Macaca_silenus_Contig64            | 6683586  | 6685081  | HERVHF_pol    | + |
| Macaca_silenus_Contig64            | 6687631  | 6688484  | HERVHF_3LTR   | + |
| Macaca_silenus_Contig67            | 997897   | 998303   | HERVHF_5LTR   | + |
| Macaca_silenus_Contig67            | 1000144  | 1000524  | HERVHF_gag    | + |
| Macaca_silenus_Contig67            | 1000708  | 1001412  | HERVHF_pro    | + |
| Macaca_silenus_Contig67            | 1000774  | 1004112  | HERVHF_pol    | + |
| Macaca_silenus_Contig67            | 1004741  | 1005155  | HERVHF_3LTR   | + |
| Macaca_silenus_Contig69            | 10321193 | 10321503 | HERVHF_5LTR   | + |
| Macaca_silenus_Contig69            | 10323736 | 10324089 | HERVHF_gag    | + |
| Macaca_silenus_Contig69            | 10324571 | 10330336 | HERVHF_pol    | + |
| Macaca_silenus_Contig69            | 10330657 | 10330958 | HERVHF_3LTR   | + |
| Macaca_silenus_Contig71            | 10617782 | 10618299 | HERVK_5LTR    | - |
| Macaca_silenus_Contig71            | 10618304 | 10618779 | HERVK_env     | - |
| Macaca_silenus_Contig71            | 10619463 | 10621070 | HERVK_pol     | - |
| Macaca_silenus_Contig71            | 10621259 | 10621957 | HERVK_pro     | - |
| Macaca_silenus_Contig71            | 10622808 | 10623315 | HERVK_3LTR    | - |
| Macaca_silenus_Contig78            | 6966859  | 6967223  | HERVK_5LTR    | - |
| Macaca_silenus_Contig78            | 6967320  | 6967664  | HERVK_env     | - |
| Macaca_silenus_Contig78            | 6968171  | 6970355  | HERVK_pol     | - |
| Macaca_silenus_Contig78            | 6970241  | 6971182  | HERVK_pro     | - |
| Macaca_silenus_Contig78            | 6972763  | 6973133  | HERVK_3LTR    | - |
| Macaca_silenus_Contig8             | 22296362 | 22296719 | HERVHF_5LTR   | + |
| Macaca_silenus_Contig8             | 22299119 | 22301213 | HERVHF_pol    | + |
| Macaca_silenus_Contig8             | 22302647 | 22303246 | HERVHF_env    | + |
| Macaca_silenus_Contig8             | 22303411 | 22303779 | HERVHF_3LTR   | + |
| Mandrillus_leucophaeus_scaffold115 | 9160213  | 9160652  | HERVHF_5LTR   | - |
| Mandrillus_leucophaeus_scaffold115 | 9161403  | 9163062  | HERVHF_pol    | - |
| Mandrillus_leucophaeus_scaffold115 | 9163419  | 9163736  | HERVHF_gag    | - |
| Mandrillus_leucophaeus_scaffold115 | 9165412  | 9165857  | HERVHF_3LTR   | - |
| Mandrillus_leucophaeus_scaffold115 | 22066850 | 22067163 | HSERVIII_5LTR | - |
| Mandrillus_leucophaeus_scaffold115 | 22068018 | 22070844 | HSERVIII_pol  | - |
| Mandrillus_leucophaeus_scaffold115 | 22072849 | 22073168 | HSERVIII_3LTR | - |
| Mandrillus_leucophaeus_scaffold125 | 43477125 | 43477566 | HERVHF_5LTR   | - |
| Mandrillus_leucophaeus_scaffold125 | 43478004 | 43478498 | HERVHF_env    | - |
| Mandrillus_leucophaeus_scaffold125 | 43478637 | 43480090 | HERVHF_pol    | - |
| Mandrillus_leucophaeus_scaffold125 | 43479509 | 43480294 | HERVHF_pro    | - |
| Mandrillus_leucophaeus_scaffold125 | 43482311 | 43482756 | HERVHF_3LTR   | - |
| Mandrillus_leucophaeus_scaffold138 | 4278695  | 4279086  | HERVHF_5LTR   | + |
| Mandrillus_leucophaeus_scaffold138 | 4280563  | 4280862  | HERVHF_gag    | + |

|                                       |          |          |             |   |
|---------------------------------------|----------|----------|-------------|---|
| Mandrillus_leucophaeus_scaffold138    | 4280927  | 4281766  | HERVHF_pro  | + |
| Mandrillus_leucophaeus_scaffold138    | 4281191  | 4283649  | HERVHF_pol  | + |
| Mandrillus_leucophaeus_scaffold138    | 4284237  | 4284638  | HERVHF_3LTR | + |
| Mandrillus_leucophaeus_scaffold138    | 32323790 | 32324103 | HERVHF_5LTR | + |
| Mandrillus_leucophaeus_scaffold138    | 32326193 | 32326948 | HERVHF_pro  | + |
| Mandrillus_leucophaeus_scaffold138    | 32327143 | 32327911 | HERVHF_pol  | + |
| Mandrillus_leucophaeus_scaffold138    | 32328336 | 32328743 | HERVHF_env  | + |
| Mandrillus_leucophaeus_scaffold138    | 32328929 | 32329249 | HERVHF_3LTR | + |
| Mandrillus_leucophaeus_scaffold139    | 19013117 | 19013506 | HERVHF_5LTR | + |
| Mandrillus_leucophaeus_scaffold139    | 19016156 | 19019170 | HERVHF_pol  | + |
| Mandrillus_leucophaeus_scaffold139    | 19019224 | 19019699 | HERVHF_env  | + |
| Mandrillus_leucophaeus_scaffold139    | 19019982 | 19020367 | HERVHF_3LTR | + |
| Mandrillus_leucophaeus_scaffold141    | 20900989 | 20901363 | HERVHF_5LTR | - |
| Mandrillus_leucophaeus_scaffold141    | 20901529 | 20902097 | HERVHF_env  | - |
| Mandrillus_leucophaeus_scaffold141    | 20902191 | 20904268 | HERVHF_pol  | - |
| Mandrillus_leucophaeus_scaffold141    | 20903831 | 20904679 | HERVHF_pro  | - |
| Mandrillus_leucophaeus_scaffold141    | 20904751 | 20905107 | HERVHF_gag  | - |
| Mandrillus_leucophaeus_scaffold141    | 20906455 | 20906827 | HERVHF_3LTR | - |
| Mandrillus_leucophaeus_scaffold141    | 24954560 | 24955014 | HERVHF_5LTR | + |
| Mandrillus_leucophaeus_scaffold141    | 24956578 | 24957853 | HERVHF_pol  | + |
| Mandrillus_leucophaeus_scaffold141    | 24958081 | 24958532 | HERVHF_3LTR | + |
| Mandrillus_leucophaeus_scaffold142    | 12991458 | 12991909 | HERVHF_5LTR | - |
| Mandrillus_leucophaeus_scaffold142    | 12992376 | 12994200 | HERVHF_pol  | - |
| Mandrillus_leucophaeus_scaffold142    | 12993580 | 12994344 | HERVHF_pro  | - |
| Mandrillus_leucophaeus_scaffold142    | 12996486 | 12996940 | HERVHF_3LTR | - |
| Mandrillus_leucophaeus_scaffold147    | 45430264 | 45430675 | HERVHF_5LTR | + |
| Mandrillus_leucophaeus_scaffold147    | 45432860 | 45433612 | HERVHF_pro  | + |
| Mandrillus_leucophaeus_scaffold147    | 45432965 | 45434677 | HERVHF_pol  | + |
| Mandrillus_leucophaeus_scaffold147    | 45435542 | 45435949 | HERVHF_3LTR | + |
| Mandrillus_leucophaeus_scaffold153820 | 6449417  | 6449826  | HERVHF_5LTR | - |
| Mandrillus_leucophaeus_scaffold153820 | 6449992  | 6450360  | HERVHF_env  | - |
| Mandrillus_leucophaeus_scaffold153820 | 6450453  | 6453149  | HERVHF_pol  | - |
| Mandrillus_leucophaeus_scaffold153820 | 6452873  | 6453388  | HERVHF_pro  | - |
| Mandrillus_leucophaeus_scaffold153820 | 6453425  | 6454435  | HERVHF_gag  | - |
| Mandrillus_leucophaeus_scaffold153820 | 6455450  | 6455851  | HERVHF_3LTR | - |
| Mandrillus_leucophaeus_scaffold153923 | 6272318  | 6272753  | HERVK_5LTR  | - |
| Mandrillus_leucophaeus_scaffold153923 | 6272824  | 6273135  | HERVK_env   | - |
| Mandrillus_leucophaeus_scaffold153923 | 6273614  | 6274807  | HERVK_pol   | - |
| Mandrillus_leucophaeus_scaffold153923 | 6274364  | 6275584  | HERVK_pro   | - |
| Mandrillus_leucophaeus_scaffold153923 | 6276389  | 6276832  | HERVK_3LTR  | - |
| Mandrillus_leucophaeus_scaffold154115 | 4046790  | 4047151  | HERVHF_5LTR | - |
| Mandrillus_leucophaeus_scaffold154115 | 4048192  | 4048704  | HERVHF_pol  | - |
| Mandrillus_leucophaeus_scaffold154115 | 4049179  | 4049478  | HERVHF_gag  | - |
| Mandrillus_leucophaeus_scaffold154115 | 4051051  | 4051400  | HERVHF_3LTR | - |

|                                       |          |          |                |   |
|---------------------------------------|----------|----------|----------------|---|
| Mandrillus_leucophaeus_scaffold154151 | 4046908  | 4047269  | HERVHF_5LTR    | - |
| Mandrillus_leucophaeus_scaffold154151 | 4048310  | 4048822  | HERVHF_pol     | - |
| Mandrillus_leucophaeus_scaffold154151 | 4049297  | 4049596  | HERVHF_gag     | - |
| Mandrillus_leucophaeus_scaffold154151 | 4051169  | 4051518  | HERVHF_3LTR    | - |
| Mandrillus_leucophaeus_scaffold178    | 5651103  | 5651551  | HERVIPADP_5LTR | - |
| Mandrillus_leucophaeus_scaffold178    | 5652034  | 5652465  | HERVIPADP_env  | - |
| Mandrillus_leucophaeus_scaffold178    | 5653472  | 5656775  | HERVIPADP_pol  | - |
| Mandrillus_leucophaeus_scaffold178    | 5659445  | 5659897  | HERVIPADP_3LTR | - |
| Mandrillus_leucophaeus_scaffold178    | 10056672 | 10056972 | HERVHF_5LTR    | - |
| Mandrillus_leucophaeus_scaffold178    | 10057587 | 10060123 | HERVHF_pol     | - |
| Mandrillus_leucophaeus_scaffold178    | 10059617 | 10060240 | HERVHF_pro     | - |
| Mandrillus_leucophaeus_scaffold178    | 10060775 | 10061074 | HERVHF_gag     | - |
| Mandrillus_leucophaeus_scaffold178    | 10062648 | 10062950 | HERVHF_3LTR    | - |
| Mandrillus_leucophaeus_scaffold178    | 13885893 | 13886411 | HERVHF_5LTR    | - |
| Mandrillus_leucophaeus_scaffold178    | 13887644 | 13889346 | HERVHF_pol     | - |
| Mandrillus_leucophaeus_scaffold178    | 13889603 | 13890034 | HERVHF_pro     | - |
| Mandrillus_leucophaeus_scaffold178    | 13890096 | 13890539 | HERVHF_gag     | - |
| Mandrillus_leucophaeus_scaffold178    | 13892255 | 13892777 | HERVHF_3LTR    | - |
| Mandrillus_leucophaeus_scaffold210    | 8662420  | 8663188  | HERVHF_5LTR    | - |
| Mandrillus_leucophaeus_scaffold210    | 8663191  | 8665294  | HERVHF_pol     | - |
| Mandrillus_leucophaeus_scaffold210    | 8668353  | 8669104  | HERVHF_3LTR    | - |
| Mandrillus_leucophaeus_scaffold211    | 1778883  | 1779204  | HERVHF_5LTR    | - |
| Mandrillus_leucophaeus_scaffold211    | 1780030  | 1782141  | HERVHF_pol     | - |
| Mandrillus_leucophaeus_scaffold211    | 1781683  | 1782198  | HERVHF_pro     | - |
| Mandrillus_leucophaeus_scaffold211    | 1782507  | 1783006  | HERVHF_gag     | - |
| Mandrillus_leucophaeus_scaffold211    | 1784639  | 1784944  | HERVHF_3LTR    | - |
| Mandrillus_leucophaeus_scaffold213    | 9001900  | 9002345  | HERVHF_5LTR    | + |
| Mandrillus_leucophaeus_scaffold213    | 9003974  | 9004279  | HERVHF_gag     | + |
| Mandrillus_leucophaeus_scaffold213    | 9004525  | 9005103  | HERVHF_pro     | + |
| Mandrillus_leucophaeus_scaffold213    | 9004750  | 9006896  | HERVHF_pol     | + |
| Mandrillus_leucophaeus_scaffold213    | 9007424  | 9007878  | HERVHF_3LTR    | + |
| Mandrillus_leucophaeus_scaffold226    | 11534543 | 11534893 | HERVK_5LTR     | + |
| Mandrillus_leucophaeus_scaffold226    | 11535277 | 11535807 | HERVK_gag      | + |
| Mandrillus_leucophaeus_scaffold226    | 11536309 | 11537087 | HERVK_pro      | + |
| Mandrillus_leucophaeus_scaffold226    | 11537137 | 11539030 | HERVK_pol      | + |
| Mandrillus_leucophaeus_scaffold226    | 11540004 | 11540372 | HERVK_3LTR     | + |
| Mandrillus_leucophaeus_scaffold227    | 25013307 | 25013736 | HERVHF_5LTR    | - |
| Mandrillus_leucophaeus_scaffold227    | 25014579 | 25016860 | HERVHF_pol     | - |
| Mandrillus_leucophaeus_scaffold227    | 25016222 | 25016965 | HERVHF_pro     | - |
| Mandrillus_leucophaeus_scaffold227    | 25019206 | 25019638 | HERVHF_3LTR    | - |
| Mandrillus_leucophaeus_scaffold245    | 12872119 | 12872571 | HERVHF_5LTR    | + |
| Mandrillus_leucophaeus_scaffold245    | 12874562 | 12875350 | HERVHF_pro     | + |
| Mandrillus_leucophaeus_scaffold245    | 12874766 | 12876317 | HERVHF_pol     | + |
| Mandrillus_leucophaeus_scaffold245    | 12877377 | 12877829 | HERVHF_3LTR    | + |

|                                    |          |          |               |   |
|------------------------------------|----------|----------|---------------|---|
| Mandrillus_leucophaeus_scaffold245 | 35324356 | 35324809 | HERVHF_5LTR   | - |
| Mandrillus_leucophaeus_scaffold245 | 35325810 | 35327520 | HERVHF_pol    | - |
| Mandrillus_leucophaeus_scaffold245 | 35327510 | 35328766 | HERVHF_pro    | - |
| Mandrillus_leucophaeus_scaffold245 | 35330542 | 35330994 | HERVHF_3LTR   | - |
| Mandrillus_leucophaeus_scaffold270 | 10391416 | 10391886 | HERVK_5LTR    | + |
| Mandrillus_leucophaeus_scaffold270 | 10392832 | 10393731 | HERVK_pro     | + |
| Mandrillus_leucophaeus_scaffold270 | 10393629 | 10395382 | HERVK_pol     | + |
| Mandrillus_leucophaeus_scaffold270 | 10396492 | 10396958 | HERVK_3LTR    | + |
| Mandrillus_leucophaeus_scaffold280 | 3616099  | 3616463  | HERVHF_5LTR   | + |
| Mandrillus_leucophaeus_scaffold280 | 3617915  | 3618226  | HERVHF_gag    | + |
| Mandrillus_leucophaeus_scaffold280 | 3618289  | 3619110  | HERVHF_pro    | + |
| Mandrillus_leucophaeus_scaffold280 | 3618778  | 3620691  | HERVHF_pol    | + |
| Mandrillus_leucophaeus_scaffold280 | 3621337  | 3621705  | HERVHF_3LTR   | + |
| Mandrillus_leucophaeus_scaffold284 | 16645734 | 16646050 | HERVHF_5LTR   | + |
| Mandrillus_leucophaeus_scaffold284 | 16647438 | 16647785 | HERVHF_gag    | + |
| Mandrillus_leucophaeus_scaffold284 | 16647955 | 16648704 | HERVHF_pro    | + |
| Mandrillus_leucophaeus_scaffold284 | 16648300 | 16651860 | HERVHF_pol    | + |
| Mandrillus_leucophaeus_scaffold284 | 16651931 | 16652317 | HERVHF_env    | + |
| Mandrillus_leucophaeus_scaffold284 | 16652483 | 16652807 | HERVHF_3LTR   | + |
| Mandrillus_leucophaeus_scaffold284 | 24840944 | 24841252 | HERVHF_5LTR   | + |
| Mandrillus_leucophaeus_scaffold284 | 24842692 | 24843030 | HERVHF_gag    | + |
| Mandrillus_leucophaeus_scaffold284 | 24843151 | 24843474 | HERVHF_pro    | + |
| Mandrillus_leucophaeus_scaffold284 | 24843575 | 24845349 | HERVHF_pol    | + |
| Mandrillus_leucophaeus_scaffold284 | 24846138 | 24846450 | HERVHF_3LTR   | + |
| Mandrillus_leucophaeus_scaffold330 | 10184710 | 10185038 | HERVHF_5LTR   | + |
| Mandrillus_leucophaeus_scaffold330 | 10186415 | 10186762 | HERVHF_gag    | + |
| Mandrillus_leucophaeus_scaffold330 | 10186826 | 10187671 | HERVHF_pro    | + |
| Mandrillus_leucophaeus_scaffold330 | 10187193 | 10189003 | HERVHF_pol    | + |
| Mandrillus_leucophaeus_scaffold330 | 10190001 | 10190340 | HERVHF_3LTR   | + |
| Mandrillus_leucophaeus_scaffold332 | 3647806  | 3648128  | HSERVIII_5LTR | - |
| Mandrillus_leucophaeus_scaffold332 | 3653930  | 3656776  | HSERVIII_pol  | - |
| Mandrillus_leucophaeus_scaffold332 | 3661897  | 3662232  | HSERVIII_3LTR | - |
| Mandrillus_leucophaeus_scaffold341 | 2132120  | 2132568  | HERVK_5LTR    | + |
| Mandrillus_leucophaeus_scaffold341 | 2134417  | 2134743  | HERVK_gag     | + |
| Mandrillus_leucophaeus_scaffold341 | 2134893  | 2135824  | HERVK_pro     | + |
| Mandrillus_leucophaeus_scaffold341 | 2135806  | 2136339  | HERVK_pol     | + |
| Mandrillus_leucophaeus_scaffold341 | 2138014  | 2138779  | HERVK_env     | + |
| Mandrillus_leucophaeus_scaffold341 | 2139090  | 2139560  | HERVK_3LTR    | + |
| Mandrillus_leucophaeus_scaffold357 | 2504643  | 2505013  | HERVHF_5LTR   | - |
| Mandrillus_leucophaeus_scaffold357 | 2505429  | 2508312  | HERVHF_pol    | - |
| Mandrillus_leucophaeus_scaffold357 | 2507749  | 2508501  | HERVHF_pro    | - |
| Mandrillus_leucophaeus_scaffold357 | 2508600  | 2508941  | HERVHF_gag    | - |
| Mandrillus_leucophaeus_scaffold357 | 2510531  | 2510907  | HERVHF_3LTR   | - |
| Mandrillus_leucophaeus_scaffold403 | 10703023 | 10703341 | HSERVIII_5LTR | + |



|                                    |          |          |               |   |
|------------------------------------|----------|----------|---------------|---|
| Mandrillus_leucophaeus_scaffold403 | 10705410 | 10708104 | HSERVIII_pol  | + |
| Mandrillus_leucophaeus_scaffold403 | 10709527 | 10709847 | HSERVIII_3LTR | + |
| Mandrillus_leucophaeus_scaffold403 | 11233085 | 11233575 | HERVHF_5LTR   | - |
| Mandrillus_leucophaeus_scaffold403 | 11234978 | 11236583 | HERVHF_pol    | - |
| Mandrillus_leucophaeus_scaffold403 | 11236800 | 11237441 | HERVHF_pro    | - |
| Mandrillus_leucophaeus_scaffold403 | 11237280 | 11238288 | HERVHF_gag    | - |
| Mandrillus_leucophaeus_scaffold403 | 11239063 | 11239554 | HERVHF_3LTR   | - |
| Mandrillus_leucophaeus_scaffold475 | 1120743  | 1121175  | HERVHF_5LTR   | + |
| Mandrillus_leucophaeus_scaffold475 | 1122490  | 1122840  | HERVHF_gag    | + |
| Mandrillus_leucophaeus_scaffold475 | 1123699  | 1124646  | HERVHF_pro    | + |
| Mandrillus_leucophaeus_scaffold475 | 1124013  | 1125904  | HERVHF_pol    | + |
| Mandrillus_leucophaeus_scaffold475 | 1126949  | 1127382  | HERVHF_3LTR   | + |
| Mandrillus_leucophaeus_scaffold536 | 113595   | 113919   | HERVK_5LTR    | + |
| Mandrillus_leucophaeus_scaffold536 | 115161   | 115928   | HERVK_pro     | + |
| Mandrillus_leucophaeus_scaffold536 | 115823   | 117098   | HERVK_pol     | + |
| Mandrillus_leucophaeus_scaffold536 | 117948   | 118272   | HERVK_3LTR    | + |
| Mandrillus_leucophaeus_scaffold706 | 9742488  | 9742865  | HERVHF_5LTR   | + |
| Mandrillus_leucophaeus_scaffold706 | 9744888  | 9745694  | HERVHF_pro    | + |
| Mandrillus_leucophaeus_scaffold706 | 9745173  | 9747074  | HERVHF_pol    | + |
| Mandrillus_leucophaeus_scaffold706 | 9747509  | 9747886  | HERVHF_3LTR   | + |
| Mandrillus_leucophaeus_scaffold714 | 372739   | 373153   | HERVK_5LTR    | - |
| Mandrillus_leucophaeus_scaffold714 | 374753   | 376226   | HERVK_pol     | - |
| Mandrillus_leucophaeus_scaffold714 | 376136   | 376795   | HERVK_pro     | - |
| Mandrillus_leucophaeus_scaffold714 | 378533   | 378937   | HERVK_3LTR    | - |
| Mandrillus_leucophaeus_scaffold76  | 56549167 | 56549476 | HERVHF_5LTR   | + |
| Mandrillus_leucophaeus_scaffold76  | 56551435 | 56551770 | HERVHF_pro    | + |
| Mandrillus_leucophaeus_scaffold76  | 56551802 | 56554148 | HERVHF_pol    | + |
| Mandrillus_leucophaeus_scaffold76  | 56554217 | 56554518 | HERVHF_3LTR   | + |
| Mandrillus_leucophaeus_scaffold76  | 67876368 | 67877202 | HERVHF_5LTR   | + |
| Mandrillus_leucophaeus_scaffold76  | 67883709 | 67884509 | HERVHF_pro    | + |
| Mandrillus_leucophaeus_scaffold76  | 67884162 | 67884701 | HERVHF_pol    | + |
| Mandrillus_leucophaeus_scaffold76  | 67885101 | 67885929 | HERVHF_3LTR   | + |
| Mandrillus_leucophaeus_scaffold78  | 34774903 | 34775299 | HERVHF_5LTR   | - |
| Mandrillus_leucophaeus_scaffold78  | 34775677 | 34777815 | HERVHF_pol    | - |
| Mandrillus_leucophaeus_scaffold78  | 34777341 | 34778303 | HERVHF_pro    | - |
| Mandrillus_leucophaeus_scaffold78  | 34780101 | 34780498 | HERVHF_3LTR   | - |
| Mandrillus_leucophaeus_scaffold78  | 52975255 | 52975607 | HERVHF_5LTR   | - |
| Mandrillus_leucophaeus_scaffold78  | 52978879 | 52981577 | HERVHF_pol    | - |
| Mandrillus_leucophaeus_scaffold78  | 52981170 | 52981955 | HERVHF_pro    | - |
| Mandrillus_leucophaeus_scaffold78  | 52982044 | 52982442 | HERVHF_gag    | - |
| Mandrillus_leucophaeus_scaffold78  | 52983976 | 52984327 | HERVHF_3LTR   | - |
| Mandrillus_leucophaeus_scaffold79  | 33064551 | 33065030 | HERVK_5LTR    | + |
| Mandrillus_leucophaeus_scaffold79  | 33065927 | 33066736 | HERVK_pro     | + |
| Mandrillus_leucophaeus_scaffold79  | 33066637 | 33068379 | HERVK_pol     | + |

Mandrillus\_leucophaeus\_scaffold79 33069081 33069392 HERVK\_env +  
Mandrillus\_leucophaeus\_scaffold79 33069491 33069981 HERVK\_3LTR +  
Mandrillus\_leucophaeus\_scaffold96 42536009 42536335 HERVHF\_5LTR -  
Mandrillus\_leucophaeus\_scaffold96 42536625 42536987 HERVHF\_env -  
Mandrillus\_leucophaeus\_scaffold96 42537276 42537980 HERVHF\_pol -  
Mandrillus\_leucophaeus\_scaffold96 42540209 42540527 HERVHF\_3LTR -  
Mandrillus\_leucophaeus\_scaffold96 47203157 47203541 HERVHF\_5LTR -  
Mandrillus\_leucophaeus\_scaffold96 47203996 47205961 HERVHF\_pol -  
Mandrillus\_leucophaeus\_scaffold96 47206272 47206610 HERVHF\_gag -  
Mandrillus\_leucophaeus\_scaffold96 47209505 47209868 HERVHF\_3LTR -  
Mandrillus\_leucophaeus\_scaffold97 2248627 2248964 HERVK\_5LTR -  
Mandrillus\_leucophaeus\_scaffold97 2250339 2252246 HERVK\_pol -  
Mandrillus\_leucophaeus\_scaffold97 2253006 2253338 HERVK\_pro -  
Mandrillus\_leucophaeus\_scaffold97 2253801 2254310 HERVK\_gag -  
Mandrillus\_leucophaeus\_scaffold97 2254788 2255131 HERVK\_3LTR -  
Mandrillus\_leucophaeus\_scaffold97 4244945 4245407 HERVHF\_5LTR -  
Mandrillus\_leucophaeus\_scaffold97 4245636 4246442 HERVHF\_env -  
Mandrillus\_leucophaeus\_scaffold97 4247384 4249864 HERVHF\_pol -  
Mandrillus\_leucophaeus\_scaffold97 4249166 4250107 HERVHF\_pro -  
Mandrillus\_leucophaeus\_scaffold97 4250193 4250714 HERVHF\_gag -  
Mandrillus\_leucophaeus\_scaffold97 4252194 4252656 HERVHF\_3LTR -  
Mandrillus\_leucophaeus\_scaffold97 55810199 55810610 HERVHF\_5LTR +  
Mandrillus\_leucophaeus\_scaffold97 55812011 55812451 HERVHF\_gag +  
Mandrillus\_leucophaeus\_scaffold97 55812456 55813403 HERVHF\_pro +  
Mandrillus\_leucophaeus\_scaffold97 55812938 55815276 HERVHF\_pol +  
Mandrillus\_leucophaeus\_scaffold97 55815404 55816059 HERVHF\_env +  
Mandrillus\_leucophaeus\_scaffold97 55816170 55816588 HERVHF\_3LTR +  
Mandrillus\_sphinx\_Contig1 74336656 74337008 HERVK\_5LTR +  
Mandrillus\_sphinx\_Contig1 74337956 74338855 HERVK\_pro +  
Mandrillus\_sphinx\_Contig1 74338750 74340497 HERVK\_pol +  
Mandrillus\_sphinx\_Contig1 74341742 74342082 HERVK\_3LTR +  
Mandrillus\_sphinx\_Contig10 26850493 26851226 HERVHF\_5LTR -  
Mandrillus\_sphinx\_Contig10 26851625 26852206 HERVHF\_pol -  
Mandrillus\_sphinx\_Contig10 26859196 26859924 HERVHF\_3LTR -  
Mandrillus\_sphinx\_Contig10 38608225 38608526 HERVHF\_5LTR -  
Mandrillus\_sphinx\_Contig10 38609316 38610941 HERVHF\_pol -  
Mandrillus\_sphinx\_Contig10 38613269 38613577 HERVHF\_3LTR -  
Mandrillus\_sphinx\_Contig101 2332955 2333254 HERVHF\_5LTR -  
Mandrillus\_sphinx\_Contig101 2334092 2335605 HERVHF\_pol -  
Mandrillus\_sphinx\_Contig101 2336144 2336521 HERVHF\_gag -  
Mandrillus\_sphinx\_Contig101 2338273 2338575 HERVHF\_3LTR -  
Mandrillus\_sphinx\_Contig105 3020251 3020711 HERVHF\_5LTR +  
Mandrillus\_sphinx\_Contig105 3022759 3023688 HERVHF\_pro +  
Mandrillus\_sphinx\_Contig105 3022936 3024673 HERVHF\_pol +

|                             |          |          |               |   |
|-----------------------------|----------|----------|---------------|---|
| Mandrillus_sphinx_Contig105 | 3025471  | 3025922  | HERVHF_3LTR   | + |
| Mandrillus_sphinx_Contig113 | 3513826  | 3514136  | HSERVIII_5LTR | - |
| Mandrillus_sphinx_Contig113 | 3520248  | 3523093  | HSERVIII_pol  | - |
| Mandrillus_sphinx_Contig113 | 3528234  | 3528540  | HSERVIII_3LTR | - |
| Mandrillus_sphinx_Contig122 | 4604486  | 4604884  | HERVHF_5LTR   | - |
| Mandrillus_sphinx_Contig122 | 4605358  | 4607301  | HERVHF_pol    | - |
| Mandrillus_sphinx_Contig122 | 4606897  | 4607655  | HERVHF_pro    | - |
| Mandrillus_sphinx_Contig122 | 4610567  | 4610962  | HERVHF_3LTR   | - |
| Mandrillus_sphinx_Contig156 | 1449025  | 1449343  | HSERVIII_5LTR | + |
| Mandrillus_sphinx_Contig156 | 1452159  | 1454762  | HSERVIII_pol  | + |
| Mandrillus_sphinx_Contig156 | 1456191  | 1456511  | HSERVIII_3LTR | + |
| Mandrillus_sphinx_Contig19  | 28245875 | 28246286 | HERVHF_5LTR   | - |
| Mandrillus_sphinx_Contig19  | 28249080 | 28251934 | HERVHF_pol    | - |
| Mandrillus_sphinx_Contig19  | 28252396 | 28252956 | HERVHF_gag    | - |
| Mandrillus_sphinx_Contig19  | 28254682 | 28255095 | HERVHF_3LTR   | - |
| Mandrillus_sphinx_Contig27  | 21017197 | 21017529 | HERVHF_5LTR   | - |
| Mandrillus_sphinx_Contig27  | 21017593 | 21017916 | HERVHF_env    | - |
| Mandrillus_sphinx_Contig27  | 21019375 | 21020264 | HERVHF_pol    | - |
| Mandrillus_sphinx_Contig27  | 21019905 | 21020723 | HERVHF_pro    | - |
| Mandrillus_sphinx_Contig27  | 21020823 | 21021332 | HERVHF_gag    | - |
| Mandrillus_sphinx_Contig27  | 21023287 | 21023614 | HERVHF_3LTR   | - |
| Mandrillus_sphinx_Contig3   | 43917860 | 43918186 | HERVHF_5LTR   | - |
| Mandrillus_sphinx_Contig3   | 43918476 | 43918838 | HERVHF_env    | - |
| Mandrillus_sphinx_Contig3   | 43919127 | 43919831 | HERVHF_pol    | - |
| Mandrillus_sphinx_Contig3   | 43922103 | 43922421 | HERVHF_3LTR   | - |
| Mandrillus_sphinx_Contig3   | 48694894 | 48695229 | HERVHF_5LTR   | - |
| Mandrillus_sphinx_Contig3   | 48695793 | 48697887 | HERVHF_pol    | - |
| Mandrillus_sphinx_Contig3   | 48698045 | 48698383 | HERVHF_gag    | - |
| Mandrillus_sphinx_Contig3   | 48701282 | 48701626 | HERVHF_3LTR   | - |
| Mandrillus_sphinx_Contig3   | 63399060 | 63399513 | HERVHF_5LTR   | - |
| Mandrillus_sphinx_Contig3   | 63400622 | 63402183 | HERVHF_pol    | - |
| Mandrillus_sphinx_Contig3   | 63401830 | 63402348 | HERVHF_pro    | - |
| Mandrillus_sphinx_Contig3   | 63402654 | 63402959 | HERVHF_gag    | - |
| Mandrillus_sphinx_Contig3   | 63404586 | 63405031 | HERVHF_3LTR   | - |
| Mandrillus_sphinx_Contig3   | 71365212 | 71365553 | HUERSP_5LTR   | - |
| Mandrillus_sphinx_Contig3   | 71370571 | 71371220 | HUERSP_pol    | - |
| Mandrillus_sphinx_Contig3   | 71371918 | 71372616 | HUERSP_gag    | - |
| Mandrillus_sphinx_Contig3   | 71374592 | 71374936 | HUERSP_3LTR   | - |
| Mandrillus_sphinx_Contig35  | 3491117  | 3491463  | HERVHF_5LTR   | + |
| Mandrillus_sphinx_Contig35  | 3493775  | 3495655  | HERVHF_pol    | + |
| Mandrillus_sphinx_Contig35  | 3496343  | 3496694  | HERVHF_3LTR   | + |
| Mandrillus_sphinx_Contig5   | 28445271 | 28445651 | HERVHF_5LTR   | + |
| Mandrillus_sphinx_Contig5   | 28447371 | 28447691 | HERVHF_gag    | + |
| Mandrillus_sphinx_Contig5   | 28447681 | 28448160 | HERVHF_pro    | + |

|                            |          |          |               |   |
|----------------------------|----------|----------|---------------|---|
| Mandrillus_sphinx_Contig5  | 28448179 | 28449400 | HERVHF_pol    | + |
| Mandrillus_sphinx_Contig5  | 28450516 | 28450906 | HERVHF_3LTR   | + |
| Mandrillus_sphinx_Contig51 | 10878947 | 10879419 | HERVHF_5LTR   | - |
| Mandrillus_sphinx_Contig51 | 10879850 | 10881873 | HERVHF_pol    | - |
| Mandrillus_sphinx_Contig51 | 10881292 | 10882071 | HERVHF_pro    | - |
| Mandrillus_sphinx_Contig51 | 10884072 | 10884539 | HERVHF_3LTR   | - |
| Mandrillus_sphinx_Contig55 | 1818322  | 1818643  | HERVHF_5LTR   | - |
| Mandrillus_sphinx_Contig55 | 1819467  | 1821578  | HERVHF_pol    | - |
| Mandrillus_sphinx_Contig55 | 1821120  | 1821635  | HERVHF_pro    | - |
| Mandrillus_sphinx_Contig55 | 1824245  | 1824550  | HERVHF_3LTR   | - |
| Mandrillus_sphinx_Contig6  | 20583725 | 20584245 | HSERVIII_5LTR | - |
| Mandrillus_sphinx_Contig6  | 20584448 | 20585083 | HSERVIII_pol  | - |
| Mandrillus_sphinx_Contig6  | 20585671 | 20586194 | HSERVIII_3LTR | - |
| Mandrillus_sphinx_Contig6  | 48124440 | 48124854 | HERVHF_5LTR   | + |
| Mandrillus_sphinx_Contig6  | 48126204 | 48126533 | HERVHF_gag    | + |
| Mandrillus_sphinx_Contig6  | 48126704 | 48127480 | HERVHF_pro    | + |
| Mandrillus_sphinx_Contig6  | 48126944 | 48128957 | HERVHF_pol    | + |
| Mandrillus_sphinx_Contig6  | 48129881 | 48130306 | HERVHF_3LTR   | + |
| Mandrillus_sphinx_Contig69 | 3048648  | 3049084  | HERVHF_5LTR   | + |
| Mandrillus_sphinx_Contig69 | 3050412  | 3051077  | HERVHF_gag    | + |
| Mandrillus_sphinx_Contig69 | 3050937  | 3051731  | HERVHF_pro    | + |
| Mandrillus_sphinx_Contig69 | 3051141  | 3053621  | HERVHF_pol    | + |
| Mandrillus_sphinx_Contig69 | 3053957  | 3054325  | HERVHF_env    | + |
| Mandrillus_sphinx_Contig69 | 3054485  | 3054914  | HERVHF_3LTR   | + |
| Mandrillus_sphinx_Contig7  | 7414455  | 7414767  | HERVHF_5LTR   | - |
| Mandrillus_sphinx_Contig7  | 7415518  | 7417331  | HERVHF_pol    | - |
| Mandrillus_sphinx_Contig7  | 7417804  | 7418205  | HERVHF_gag    | - |
| Mandrillus_sphinx_Contig7  | 7419637  | 7419945  | HERVHF_3LTR   | - |
| Mandrillus_sphinx_Contig70 | 3296547  | 3296943  | HERVHF_5LTR   | - |
| Mandrillus_sphinx_Contig70 | 3297597  | 3299940  | HERVHF_pol    | - |
| Mandrillus_sphinx_Contig70 | 3299368  | 3300231  | HERVHF_pro    | - |
| Mandrillus_sphinx_Contig70 | 3302434  | 3302831  | HERVHF_3LTR   | - |
| Mandrillus_sphinx_Contig74 | 5907771  | 5908156  | HERVHF_5LTR   | - |
| Mandrillus_sphinx_Contig74 | 5908447  | 5908916  | HERVHF_env    | - |
| Mandrillus_sphinx_Contig74 | 5908925  | 5911984  | HERVHF_pol    | - |
| Mandrillus_sphinx_Contig74 | 5912590  | 5913075  | HERVHF_gag    | - |
| Mandrillus_sphinx_Contig74 | 5914640  | 5915029  | HERVHF_3LTR   | - |
| Mandrillus_sphinx_Contig8  | 7451183  | 7451673  | HERVK_5LTR    | - |
| Mandrillus_sphinx_Contig8  | 7451774  | 7452112  | HERVK_env     | - |
| Mandrillus_sphinx_Contig8  | 7452619  | 7454529  | HERVK_pol     | - |
| Mandrillus_sphinx_Contig8  | 7454430  | 7455239  | HERVK_pro     | - |
| Mandrillus_sphinx_Contig8  | 7456134  | 7456613  | HERVK_3LTR    | - |
| Mandrillus_sphinx_Contig8  | 16678059 | 16678576 | HERVK_5LTR    | + |
| Mandrillus_sphinx_Contig8  | 16679075 | 16679998 | HERVK_gag     | + |

|                                |          |          |                   |   |
|--------------------------------|----------|----------|-------------------|---|
| Mandrillus_sphinx_Contig8      | 16679976 | 16680885 | HERVK_pro         | + |
| Mandrillus_sphinx_Contig8      | 16680780 | 16682066 | HERVK_pol         | + |
| Mandrillus_sphinx_Contig8      | 16682497 | 16682847 | HERVK_env         | + |
| Mandrillus_sphinx_Contig8      | 16682924 | 16683438 | HERVK_3LTR        | + |
| Mandrillus_sphinx_Contig86     | 6594449  | 6594906  | HERVK_5LTR        | - |
| Mandrillus_sphinx_Contig86     | 6594977  | 6595288  | HERVK_env         | - |
| Mandrillus_sphinx_Contig86     | 6595824  | 6596885  | HERVK_pol         | - |
| Mandrillus_sphinx_Contig86     | 6596950  | 6597822  | HERVK_pro         | - |
| Mandrillus_sphinx_Contig86     | 6598600  | 6599065  | HERVK_3LTR        | - |
| Mandrillus_sphinx_Contig88     | 2717701  | 2718071  | HERVK_5LTR        | + |
| Mandrillus_sphinx_Contig88     | 2719481  | 2720038  | HERVK_gag         | + |
| Mandrillus_sphinx_Contig88     | 2719655  | 2720554  | HERVK_pro         | + |
| Mandrillus_sphinx_Contig88     | 2720449  | 2721708  | HERVK_pol         | + |
| Mandrillus_sphinx_Contig88     | 2723283  | 2723661  | HERVK_3LTR        | + |
| Mandrillus_sphinx_Contig99     | 8316616  | 8316964  | HERVK_5LTR        | - |
| Mandrillus_sphinx_Contig99     | 8318346  | 8320252  | HERVK_pol         | - |
| Mandrillus_sphinx_Contig99     | 8320263  | 8320955  | HERVK_pro         | - |
| Mandrillus_sphinx_Contig99     | 8322466  | 8322804  | HERVK_3LTR        | - |
| Microcebus_murinus_CM007676.1  | 53132794 | 53133099 | Unknown_HERV_5LTR | - |
| Microcebus_murinus_CM007676.1  | 53135607 | 53136293 | Unknown_HERV_pol  | - |
| Microcebus_murinus_CM007676.1  | 53145546 | 53145853 | Unknown_HERV_3LTR | - |
| Microcebus_murinus_CM007693.1  | 20082129 | 20082469 | Unknown_HERV_5LTR | - |
| Microcebus_murinus_CM007693.1  | 20085607 | 20086996 | Unknown_HERV_pol  | - |
| Microcebus_murinus_CM007693.1  | 20092654 | 20092993 | Unknown_HERV_3LTR | - |
| Microcebus_murinus_CM007693.1  | 67280892 | 67281471 | HERVIPADP_5LTR    | + |
| Microcebus_murinus_CM007693.1  | 67282948 | 67285059 | HERVIPADP_pol     | + |
| Microcebus_murinus_CM007693.1  | 67288770 | 67289351 | HERVIPADP_3LTR    | + |
| Nomascus_leucogenys_tarseq_0   | 10127461 | 10127902 | HUERSP_5LTR       | - |
| Nomascus_leucogenys_tarseq_0   | 10129505 | 10131689 | HUERSP_pol        | - |
| Nomascus_leucogenys_tarseq_0   | 10132637 | 10133293 | HUERSP_gag        | - |
| Nomascus_leucogenys_tarseq_0   | 10135453 | 10135899 | HUERSP_3LTR       | - |
| Nomascus_leucogenys_tarseq_1   | 13138765 | 13139179 | HERVHF_5LTR       | + |
| Nomascus_leucogenys_tarseq_1   | 13140493 | 13141350 | HERVHF_gag        | + |
| Nomascus_leucogenys_tarseq_1   | 13142189 | 13142596 | HERVHF_pol        | + |
| Nomascus_leucogenys_tarseq_1   | 13142778 | 13143161 | HERVHF_env        | + |
| Nomascus_leucogenys_tarseq_1   | 13143883 | 13144297 | HERVHF_3LTR       | + |
| Nomascus_leucogenys_tarseq_103 | 98094    | 98532    | HERVIPADP_5LTR    | + |
| Nomascus_leucogenys_tarseq_103 | 100851   | 105113   | HERVIPADP_pol     | + |
| Nomascus_leucogenys_tarseq_103 | 107020   | 107388   | HERVIPADP_env     | + |
| Nomascus_leucogenys_tarseq_103 | 107621   | 108056   | HERVIPADP_3LTR    | + |
| Nomascus_leucogenys_tarseq_11  | 22159819 | 22160130 | HERVHF_5LTR       | - |
| Nomascus_leucogenys_tarseq_11  | 22162619 | 22163383 | HERVHF_pol        | - |
| Nomascus_leucogenys_tarseq_11  | 22163904 | 22164521 | HERVHF_gag        | - |
| Nomascus_leucogenys_tarseq_11  | 22165401 | 22165711 | HERVHF_3LTR       | - |

|                                |          |          |                |   |
|--------------------------------|----------|----------|----------------|---|
| Nomascus_leucogenys_tarseq_112 | 20931278 | 20931679 | HSERVIII_5LTR  | - |
| Nomascus_leucogenys_tarseq_112 | 20932434 | 20934771 | HSERVIII_pol   | - |
| Nomascus_leucogenys_tarseq_112 | 20936783 | 20937183 | HSERVIII_3LTR  | - |
| Nomascus_leucogenys_tarseq_12  | 6851265  | 6851714  | HERVHF_5LTR    | + |
| Nomascus_leucogenys_tarseq_12  | 6853712  | 6854728  | HERVHF_pro     | + |
| Nomascus_leucogenys_tarseq_12  | 6853967  | 6855889  | HERVHF_pol     | + |
| Nomascus_leucogenys_tarseq_12  | 6856257  | 6856595  | HERVHF_env     | + |
| Nomascus_leucogenys_tarseq_12  | 6856760  | 6857211  | HERVHF_3LTR    | + |
| Nomascus_leucogenys_tarseq_138 | 3850784  | 3851456  | HSERVIII_5LTR  | - |
| Nomascus_leucogenys_tarseq_138 | 3856533  | 3859338  | HSERVIII_pol   | - |
| Nomascus_leucogenys_tarseq_138 | 3863272  | 3863945  | HSERVIII_3LTR  | - |
| Nomascus_leucogenys_tarseq_140 | 2518488  | 2518899  | HERVHF_5LTR    | + |
| Nomascus_leucogenys_tarseq_140 | 2521301  | 2522984  | HERVHF_pol     | + |
| Nomascus_leucogenys_tarseq_140 | 2523628  | 2524039  | HERVHF_3LTR    | + |
| Nomascus_leucogenys_tarseq_147 | 724363   | 724751   | HERVK_5LTR     | - |
| Nomascus_leucogenys_tarseq_147 | 724921   | 725392   | HERVK_env      | - |
| Nomascus_leucogenys_tarseq_147 | 726350   | 727632   | HERVK_pol      | - |
| Nomascus_leucogenys_tarseq_147 | 728781   | 729686   | HERVK_pro      | - |
| Nomascus_leucogenys_tarseq_147 | 729754   | 730434   | HERVK_gag      | - |
| Nomascus_leucogenys_tarseq_147 | 731247   | 731626   | HERVK_3LTR     | - |
| Nomascus_leucogenys_tarseq_154 | 1830457  | 1830901  | HSERVIII_5LTR  | + |
| Nomascus_leucogenys_tarseq_154 | 1837612  | 1838151  | HSERVIII_pol   | + |
| Nomascus_leucogenys_tarseq_154 | 1839032  | 1839480  | HSERVIII_3LTR  | + |
| Nomascus_leucogenys_tarseq_16  | 2498582  | 2498994  | HERVHF_5LTR    | + |
| Nomascus_leucogenys_tarseq_16  | 2500972  | 2501352  | HERVHF_gag     | + |
| Nomascus_leucogenys_tarseq_16  | 2501385  | 2503461  | HERVHF_pro     | + |
| Nomascus_leucogenys_tarseq_16  | 2502919  | 2504868  | HERVHF_pol     | + |
| Nomascus_leucogenys_tarseq_16  | 2505439  | 2505853  | HERVHF_3LTR    | + |
| Nomascus_leucogenys_tarseq_25  | 6837678  | 6838064  | HERVIPADP_5LTR | - |
| Nomascus_leucogenys_tarseq_25  | 6838250  | 6839104  | HERVIPADP_env  | - |
| Nomascus_leucogenys_tarseq_25  | 6840464  | 6843279  | HERVIPADP_pol  | - |
| Nomascus_leucogenys_tarseq_25  | 6843980  | 6844504  | HERVIPADP_gag  | - |
| Nomascus_leucogenys_tarseq_25  | 6845946  | 6846330  | HERVIPADP_3LTR | - |
| Nomascus_leucogenys_tarseq_260 | 7390828  | 7391281  | HERVHF_5LTR    | + |
| Nomascus_leucogenys_tarseq_260 | 7392694  | 7392993  | HERVHF_gag     | + |
| Nomascus_leucogenys_tarseq_260 | 7393071  | 7393841  | HERVHF_pro     | + |
| Nomascus_leucogenys_tarseq_260 | 7393263  | 7394402  | HERVHF_pol     | + |
| Nomascus_leucogenys_tarseq_260 | 7396195  | 7397184  | HERVHF_env     | + |
| Nomascus_leucogenys_tarseq_260 | 7397349  | 7397800  | HERVHF_3LTR    | + |
| Nomascus_leucogenys_tarseq_3   | 2102209  | 2102551  | HERVHF_5LTR    | + |
| Nomascus_leucogenys_tarseq_3   | 2105144  | 2105725  | HERVHF_pol     | + |
| Nomascus_leucogenys_tarseq_3   | 2107388  | 2107731  | HERVHF_3LTR    | + |
| Nomascus_leucogenys_tarseq_3   | 21415972 | 21416385 | HERVHF_5LTR    | - |
| Nomascus_leucogenys_tarseq_3   | 21416975 | 21418914 | HERVHF_pol     | - |

|                                |          |          |             |   |
|--------------------------------|----------|----------|-------------|---|
| Nomascus_leucogenys_tarseq_3   | 21418372 | 21419190 | HERVHF_pro  | - |
| Nomascus_leucogenys_tarseq_3   | 21420583 | 21420998 | HERVHF_3LTR | - |
| Nomascus_leucogenys_tarseq_31  | 15346712 | 15347162 | HERVHF_5LTR | + |
| Nomascus_leucogenys_tarseq_31  | 15349108 | 15349431 | HERVHF_gag  | + |
| Nomascus_leucogenys_tarseq_31  | 15349757 | 15351396 | HERVHF_pol  | + |
| Nomascus_leucogenys_tarseq_31  | 15352192 | 15352644 | HERVHF_3LTR | + |
| Nomascus_leucogenys_tarseq_33  | 6011756  | 6012109  | HERVK_5LTR  | - |
| Nomascus_leucogenys_tarseq_33  | 6012182  | 6012520  | HERVK_env   | - |
| Nomascus_leucogenys_tarseq_33  | 6013020  | 6014794  | HERVK_pol   | - |
| Nomascus_leucogenys_tarseq_33  | 6014904  | 6015674  | HERVK_pro   | - |
| Nomascus_leucogenys_tarseq_33  | 6017361  | 6017704  | HERVK_3LTR  | - |
| Nomascus_leucogenys_tarseq_37  | 3719348  | 3719832  | HERVK_5LTR  | + |
| Nomascus_leucogenys_tarseq_37  | 3720706  | 3721170  | HERVK_gag   | + |
| Nomascus_leucogenys_tarseq_37  | 3721273  | 3722176  | HERVK_pro   | + |
| Nomascus_leucogenys_tarseq_37  | 3722080  | 3722832  | HERVK_pol   | + |
| Nomascus_leucogenys_tarseq_37  | 3724068  | 3724556  | HERVK_3LTR  | + |
| Nomascus_leucogenys_tarseq_41  | 11852484 | 11852895 | HERVHF_5LTR | + |
| Nomascus_leucogenys_tarseq_41  | 11854291 | 11854839 | HERVHF_gag  | + |
| Nomascus_leucogenys_tarseq_41  | 11854999 | 11855703 | HERVHF_pro  | + |
| Nomascus_leucogenys_tarseq_41  | 11855065 | 11857276 | HERVHF_pol  | + |
| Nomascus_leucogenys_tarseq_41  | 11857339 | 11857872 | HERVHF_env  | + |
| Nomascus_leucogenys_tarseq_41  | 11858035 | 11858448 | HERVHF_3LTR | + |
| Nomascus_leucogenys_tarseq_41  | 12515322 | 12515678 | HERVHF_5LTR | + |
| Nomascus_leucogenys_tarseq_41  | 12517407 | 12517706 | HERVHF_gag  | + |
| Nomascus_leucogenys_tarseq_41  | 12518231 | 12520189 | HERVHF_pol  | + |
| Nomascus_leucogenys_tarseq_41  | 12520739 | 12521088 | HERVHF_3LTR | + |
| Nomascus_leucogenys_tarseq_430 | 3167345  | 3167660  | HERVK_5LTR  | - |
| Nomascus_leucogenys_tarseq_430 | 3167667  | 3168072  | HERVK_env   | - |
| Nomascus_leucogenys_tarseq_430 | 3169009  | 3170484  | HERVK_pol   | - |
| Nomascus_leucogenys_tarseq_430 | 3170423  | 3171348  | HERVK_pro   | - |
| Nomascus_leucogenys_tarseq_430 | 3171723  | 3172283  | HERVK_gag   | - |
| Nomascus_leucogenys_tarseq_430 | 3172917  | 3173233  | HERVK_3LTR  | - |
| Nomascus_leucogenys_tarseq_44  | 14090159 | 14090461 | HERVHF_5LTR | + |
| Nomascus_leucogenys_tarseq_44  | 14092590 | 14093147 | HERVHF_pro  | + |
| Nomascus_leucogenys_tarseq_44  | 14093164 | 14095821 | HERVHF_pol  | + |
| Nomascus_leucogenys_tarseq_44  | 14096364 | 14096668 | HERVHF_3LTR | + |
| Nomascus_leucogenys_tarseq_44  | 22523800 | 22524208 | HERVK_5LTR  | + |
| Nomascus_leucogenys_tarseq_44  | 22525636 | 22526564 | HERVK_pro   | + |
| Nomascus_leucogenys_tarseq_44  | 22526459 | 22527772 | HERVK_pol   | + |
| Nomascus_leucogenys_tarseq_44  | 22529569 | 22529976 | HERVK_3LTR  | + |
| Nomascus_leucogenys_tarseq_51  | 7176387  | 7176697  | HERVHF_5LTR | + |
| Nomascus_leucogenys_tarseq_51  | 7178050  | 7178478  | HERVHF_pro  | + |
| Nomascus_leucogenys_tarseq_51  | 7178657  | 7179277  | HERVHF_pol  | + |
| Nomascus_leucogenys_tarseq_51  | 7182126  | 7182436  | HERVHF_3LTR | + |

|                                                   |           |           |                   |   |
|---------------------------------------------------|-----------|-----------|-------------------|---|
| Nomascus_leucogenys_tarseq_9                      | 7417553   | 7417965   | HERVHF_5LTR       | - |
| Nomascus_leucogenys_tarseq_9                      | 7418590   | 7420176   | HERVHF_pol        | - |
| Nomascus_leucogenys_tarseq_9                      | 7419898   | 7420713   | HERVHF_pro        | - |
| Nomascus_leucogenys_tarseq_9                      | 7420823   | 7421206   | HERVHF_gag        | - |
| Nomascus_leucogenys_tarseq_9                      | 7422728   | 7423147   | HERVHF_3LTR       | - |
| Nomascus_leucogenys_tarseq_9                      | 21485266  | 21485565  | HSERVIII_5LTR     | + |
| Nomascus_leucogenys_tarseq_9                      | 21487357  | 21487830  | HSERVIII_pol      | + |
| Nomascus_leucogenys_tarseq_9                      | 21490874  | 21491178  | HSERVIII_3LTR     | + |
| Nycticebus_bengalensis_LG02                       | 100642868 | 100643579 | Unknown_HERV_5LTR | - |
| Nycticebus_bengalensis_LG02                       | 100645912 | 100649249 | Unknown_HERV_pol  | - |
| Nycticebus_bengalensis_LG02                       | 100649115 | 100650137 | Unknown_HERV_pro  | - |
| Nycticebus_bengalensis_LG02                       | 100652088 | 100652802 | Unknown_HERV_3LTR | - |
| Nycticebus_bengalensis_LG02                       | 102672581 | 102672897 | HERVHF_5LTR       | - |
| Nycticebus_bengalensis_LG02                       | 102674383 | 102676483 | HERVHF_pol        | - |
| Nycticebus_bengalensis_LG02                       | 102677458 | 102677958 | HERVHF_gag        | - |
| Nycticebus_bengalensis_LG02                       | 102679344 | 102679654 | HERVHF_3LTR       | - |
| Nycticebus_pygmaeus_lh.2rd_polish_hic_scaffold_20 | 41529627  | 41530007  | Unknown_HERV_5LTR |   |
| +                                                 |           |           |                   |   |
| Nycticebus_pygmaeus_lh.2rd_polish_hic_scaffold_20 | 41531444  | 41532874  | Unknown_HERV_pol  |   |
| +                                                 |           |           |                   |   |
| Nycticebus_pygmaeus_lh.2rd_polish_hic_scaffold_20 | 41533507  | 41533857  | Unknown_HERV_env  |   |
| +                                                 |           |           |                   |   |
| Nycticebus_pygmaeus_lh.2rd_polish_hic_scaffold_20 | 41534089  | 41534469  | Unknown_HERV_3LTR |   |
| +                                                 |           |           |                   |   |
| Nycticebus_pygmaeus_lh.2rd_polish_hic_scaffold_3  | 34740973  | 34741848  | HERVHF_5LTR       | - |
| Nycticebus_pygmaeus_lh.2rd_polish_hic_scaffold_3  | 34742729  | 34745132  | HERVHF_pol        | - |
| Nycticebus_pygmaeus_lh.2rd_polish_hic_scaffold_3  | 34744952  | 34745503  | HERVHF_pro        | - |
| Nycticebus_pygmaeus_lh.2rd_polish_hic_scaffold_3  | 34751113  | 34751996  | HERVHF_3LTR       | - |
| Nycticebus_pygmaeus_lh.2rd_polish_hic_scaffold_9  | 29265859  | 29266248  | Unknown_HERV_5LTR |   |
| +                                                 |           |           |                   |   |
| Nycticebus_pygmaeus_lh.2rd_polish_hic_scaffold_9  | 29269000  | 29270731  | Unknown_HERV_gag  |   |
| +                                                 |           |           |                   |   |
| Nycticebus_pygmaeus_lh.2rd_polish_hic_scaffold_9  | 29270948  | 29271274  | Unknown_HERV_pro  |   |
| +                                                 |           |           |                   |   |
| Nycticebus_pygmaeus_lh.2rd_polish_hic_scaffold_9  | 29271618  | 29273634  | Unknown_HERV_pol  |   |
| +                                                 |           |           |                   |   |



Nycticebus\_pygmaeus\_lh.2rd\_polish\_hic\_scaffold\_9 29274373 29274762 Unknown\_HERV\_3LTR

+

|                               |          |          |             |   |
|-------------------------------|----------|----------|-------------|---|
| Otolemur_garnettii_GL873590.1 | 6207717  | 6208066  | HERVW9_5LTR | - |
| Otolemur_garnettii_GL873590.1 | 6208618  | 6211341  | HERVW9_pol  | - |
| Otolemur_garnettii_GL873590.1 | 6211350  | 6212042  | HERVW9_pro  | - |
| Otolemur_garnettii_GL873590.1 | 6212285  | 6212881  | HERVW9_gag  | - |
| Otolemur_garnettii_GL873590.1 | 6215297  | 6215648  | HERVW9_3LTR | - |
| Otolemur_garnettii_GL873777.1 | 1217236  | 1217546  | HERVHF_5LTR | - |
| Otolemur_garnettii_GL873777.1 | 1218437  | 1220680  | HERVHF_pol  | - |
| Otolemur_garnettii_GL873777.1 | 1219952  | 1220929  | HERVHF_pro  | - |
| Otolemur_garnettii_GL873777.1 | 1223463  | 1223775  | HERVHF_3LTR | - |
| Pan_paniscus_CM003383.1       | 4912654  | 4912982  | HERVHF_5LTR | + |
| Pan_paniscus_CM003383.1       | 4913544  | 4914049  | HERVHF_gag  | + |
| Pan_paniscus_CM003383.1       | 4915301  | 4917102  | HERVHF_pol  | + |
| Pan_paniscus_CM003383.1       | 4918175  | 4918511  | HERVHF_3LTR | + |
| Pan_paniscus_CM003383.1       | 16233726 | 16234240 | HERVK_5LTR  | - |
| Pan_paniscus_CM003383.1       | 16235456 | 16236956 | HERVK_pol   | - |
| Pan_paniscus_CM003383.1       | 16236854 | 16237795 | HERVK_pro   | - |
| Pan_paniscus_CM003383.1       | 16239199 | 16239715 | HERVK_3LTR  | - |
| Pan_paniscus_CM003383.1       | 23130769 | 23131193 | HERVHF_5LTR | - |
| Pan_paniscus_CM003383.1       | 23131361 | 23131711 | HERVHF_env  | - |
| Pan_paniscus_CM003383.1       | 23132773 | 23135184 | HERVHF_pol  | - |
| Pan_paniscus_CM003383.1       | 23134754 | 23135449 | HERVHF_pro  | - |
| Pan_paniscus_CM003383.1       | 23135523 | 23135846 | HERVHF_gag  | - |
| Pan_paniscus_CM003383.1       | 23137303 | 23137718 | HERVHF_3LTR | - |
| Pan_paniscus_CM003383.1       | 71586511 | 71586893 | HERVHF_5LTR | + |
| Pan_paniscus_CM003383.1       | 71588315 | 71588749 | HERVHF_gag  | + |
| Pan_paniscus_CM003383.1       | 71588798 | 71589322 | HERVHF_pro  | + |
| Pan_paniscus_CM003383.1       | 71589213 | 71591833 | HERVHF_pol  | + |
| Pan_paniscus_CM003383.1       | 71591934 | 71592290 | HERVHF_env  | + |
| Pan_paniscus_CM003383.1       | 71592454 | 71592827 | HERVHF_3LTR | + |
| Pan_paniscus_CM003383.1       | 78195859 | 78196266 | HERVHF_5LTR | - |
| Pan_paniscus_CM003383.1       | 78196827 | 78198597 | HERVHF_pol  | - |
| Pan_paniscus_CM003383.1       | 78198170 | 78199030 | HERVHF_pro  | - |
| Pan_paniscus_CM003383.1       | 78199037 | 78199357 | HERVHF_gag  | - |
| Pan_paniscus_CM003383.1       | 78200970 | 78201393 | HERVHF_3LTR | - |
| Pan_paniscus_CM003383.1       | 80218595 | 80218929 | HERVHF_5LTR | + |
| Pan_paniscus_CM003383.1       | 80220477 | 80221073 | HERVHF_gag  | + |
| Pan_paniscus_CM003383.1       | 80221125 | 80221889 | HERVHF_pro  | + |
| Pan_paniscus_CM003383.1       | 80221368 | 80223777 | HERVHF_pol  | + |
| Pan_paniscus_CM003383.1       | 80225856 | 80226571 | HERVHF_env  | + |
| Pan_paniscus_CM003383.1       | 80226889 | 80227225 | HERVHF_3LTR | + |
| Pan_paniscus_CM003383.1       | 83676068 | 83676465 | HERVHF_5LTR | - |
| Pan_paniscus_CM003383.1       | 83677532 | 83679328 | HERVHF_pol  | - |

|                         |           |           |             |   |
|-------------------------|-----------|-----------|-------------|---|
| Pan_paniscus_CM003383.1 | 83678786  | 83679451  | HERVHF_pro  | - |
| Pan_paniscus_CM003383.1 | 83679625  | 83679981  | HERVHF_gag  | - |
| Pan_paniscus_CM003383.1 | 83681664  | 83682061  | HERVHF_3LTR | - |
| Pan_paniscus_CM003383.1 | 95956544  | 95956851  | HERVHF_5LTR | - |
| Pan_paniscus_CM003383.1 | 95957587  | 95959898  | HERVHF_pol  | - |
| Pan_paniscus_CM003383.1 | 95959356  | 95960060  | HERVHF_pro  | - |
| Pan_paniscus_CM003383.1 | 95962448  | 95962754  | HERVHF_3LTR | - |
| Pan_paniscus_CM003383.1 | 185783185 | 185783630 | HERVK_5LTR  | + |
| Pan_paniscus_CM003383.1 | 185785129 | 185786045 | HERVK_pro   | + |
| Pan_paniscus_CM003383.1 | 185785940 | 185787208 | HERVK_pol   | + |
| Pan_paniscus_CM003383.1 | 185788130 | 185788582 | HERVK_3LTR  | + |
| Pan_paniscus_CM003383.1 | 195835107 | 195835555 | HERVHF_5LTR | - |
| Pan_paniscus_CM003383.1 | 195836160 | 195837782 | HERVHF_pol  | - |
| Pan_paniscus_CM003383.1 | 195837739 | 195838197 | HERVHF_pro  | - |
| Pan_paniscus_CM003383.1 | 195840269 | 195840718 | HERVHF_3LTR | - |
| Pan_paniscus_CM003383.1 | 209751527 | 209751973 | HERVHF_5LTR | + |
| Pan_paniscus_CM003383.1 | 209754539 | 209754943 | HERVHF_gag  | + |
| Pan_paniscus_CM003383.1 | 209755179 | 209755751 | HERVHF_pro  | + |
| Pan_paniscus_CM003383.1 | 209755233 | 209757367 | HERVHF_pol  | + |
| Pan_paniscus_CM003383.1 | 209757889 | 209758329 | HERVHF_3LTR | + |
| Pan_paniscus_CM003383.1 | 221977301 | 221977703 | HERVHF_5LTR | + |
| Pan_paniscus_CM003383.1 | 221979552 | 221979857 | HERVHF_gag  | + |
| Pan_paniscus_CM003383.1 | 221980290 | 221982472 | HERVHF_pol  | + |
| Pan_paniscus_CM003383.1 | 221982891 | 221983293 | HERVHF_3LTR | + |
| Pan_paniscus_CM003384.1 | 20184708  | 20185141  | HERVHF_5LTR | + |
| Pan_paniscus_CM003384.1 | 20186622  | 20186951  | HERVHF_gag  | + |
| Pan_paniscus_CM003384.1 | 20186944  | 20187702  | HERVHF_pro  | + |
| Pan_paniscus_CM003384.1 | 20187443  | 20189388  | HERVHF_pol  | + |
| Pan_paniscus_CM003384.1 | 20189798  | 20190209  | HERVHF_3LTR | + |
| Pan_paniscus_CM003384.1 | 38864068  | 38864479  | HERVHF_5LTR | - |
| Pan_paniscus_CM003384.1 | 38864489  | 38864850  | HERVHF_env  | - |
| Pan_paniscus_CM003384.1 | 38865020  | 38867001  | HERVHF_pol  | - |
| Pan_paniscus_CM003384.1 | 38866465  | 38867250  | HERVHF_pro  | - |
| Pan_paniscus_CM003384.1 | 38867391  | 38867711  | HERVHF_gag  | - |
| Pan_paniscus_CM003384.1 | 38869412  | 38869813  | HERVHF_3LTR | - |
| Pan_paniscus_CM003384.1 | 42334505  | 42334936  | HERVHF_5LTR | + |
| Pan_paniscus_CM003384.1 | 42335712  | 42337075  | HERVHF_gag  | + |
| Pan_paniscus_CM003384.1 | 42337085  | 42337615  | HERVHF_pro  | + |
| Pan_paniscus_CM003384.1 | 42338083  | 42341031  | HERVHF_pol  | + |
| Pan_paniscus_CM003384.1 | 42341198  | 42341521  | HERVHF_env  | + |
| Pan_paniscus_CM003384.1 | 42341956  | 42342387  | HERVHF_3LTR | + |
| Pan_paniscus_CM003384.1 | 68515613  | 68516012  | HERVHF_5LTR | + |
| Pan_paniscus_CM003384.1 | 68517853  | 68518164  | HERVHF_gag  | + |
| Pan_paniscus_CM003384.1 | 68518449  | 68519189  | HERVHF_pro  | + |

|                         |           |           |             |   |
|-------------------------|-----------|-----------|-------------|---|
| Pan_paniscus_CM003384.1 | 68518623  | 68520145  | HERVHF_pol  | + |
| Pan_paniscus_CM003384.1 | 68521323  | 68521723  | HERVHF_3LTR | + |
| Pan_paniscus_CM003384.1 | 72705308  | 72705748  | HERVHF_5LTR | - |
| Pan_paniscus_CM003384.1 | 72706646  | 72708165  | HERVHF_pol  | - |
| Pan_paniscus_CM003384.1 | 72707575  | 72708159  | HERVHF_pro  | - |
| Pan_paniscus_CM003384.1 | 72710418  | 72710856  | HERVHF_3LTR | - |
| Pan_paniscus_CM003385.1 | 161223748 | 161224162 | HERVHF_5LTR | - |
| Pan_paniscus_CM003385.1 | 161224768 | 161226350 | HERVHF_pol  | - |
| Pan_paniscus_CM003385.1 | 161226349 | 161226945 | HERVHF_pro  | - |
| Pan_paniscus_CM003385.1 | 161226979 | 161227299 | HERVHF_gag  | - |
| Pan_paniscus_CM003385.1 | 161229114 | 161229534 | HERVHF_3LTR | - |
| Pan_paniscus_CM003385.1 | 175718812 | 175719218 | HERVHF_5LTR | - |
| Pan_paniscus_CM003385.1 | 175719667 | 175721823 | HERVHF_pol  | - |
| Pan_paniscus_CM003385.1 | 175721449 | 175722168 | HERVHF_pro  | - |
| Pan_paniscus_CM003385.1 | 175724297 | 175724700 | HERVHF_3LTR | - |
| Pan_paniscus_CM003385.1 | 213578704 | 213579008 | HERVHF_5LTR | - |
| Pan_paniscus_CM003385.1 | 213579460 | 213581967 | HERVHF_pol  | - |
| Pan_paniscus_CM003385.1 | 213581353 | 213582033 | HERVHF_pro  | - |
| Pan_paniscus_CM003385.1 | 213584302 | 213584608 | HERVHF_3LTR | - |
| Pan_paniscus_CM003385.1 | 214554812 | 214555124 | HERVHF_5LTR | + |
| Pan_paniscus_CM003385.1 | 214563815 | 214564351 | HERVHF_pro  | + |
| Pan_paniscus_CM003385.1 | 214564422 | 214566629 | HERVHF_pol  | + |
| Pan_paniscus_CM003385.1 | 214567071 | 214567379 | HERVHF_3LTR | + |
| Pan_paniscus_CM003385.1 | 220569612 | 220570071 | HERVHF_5LTR | - |
| Pan_paniscus_CM003385.1 | 220570320 | 220572735 | HERVHF_pol  | - |
| Pan_paniscus_CM003385.1 | 220572770 | 220573285 | HERVHF_pro  | - |
| Pan_paniscus_CM003385.1 | 220575543 | 220575996 | HERVHF_3LTR | - |
| Pan_paniscus_CM003385.1 | 220825791 | 220826128 | HERVHF_5LTR | + |
| Pan_paniscus_CM003385.1 | 220828123 | 220828734 | HERVHF_pro  | + |
| Pan_paniscus_CM003385.1 | 220828306 | 220830058 | HERVHF_pol  | + |
| Pan_paniscus_CM003385.1 | 220831515 | 220831855 | HERVHF_3LTR | + |
| Pan_paniscus_CM003386.1 | 931490    | 931904    | HERVHF_5LTR | - |
| Pan_paniscus_CM003386.1 | 932331    | 934435    | HERVHF_pol  | - |
| Pan_paniscus_CM003386.1 | 933893    | 934726    | HERVHF_pro  | - |
| Pan_paniscus_CM003386.1 | 934730    | 935059    | HERVHF_gag  | - |
| Pan_paniscus_CM003386.1 | 936800    | 937217    | HERVHF_3LTR | - |
| Pan_paniscus_CM003386.1 | 21438814  | 21439220  | HERVHF_5LTR | - |
| Pan_paniscus_CM003386.1 | 21439667  | 21441813  | HERVHF_pol  | - |
| Pan_paniscus_CM003386.1 | 21441247  | 21442170  | HERVHF_pro  | - |
| Pan_paniscus_CM003386.1 | 21442227  | 21442550  | HERVHF_gag  | - |
| Pan_paniscus_CM003386.1 | 21443575  | 21443978  | HERVHF_3LTR | - |
| Pan_paniscus_CM003386.1 | 71735709  | 71736121  | HERVHF_5LTR | - |
| Pan_paniscus_CM003386.1 | 71736577  | 71738555  | HERVHF_pol  | - |
| Pan_paniscus_CM003386.1 | 71738304  | 71739128  | HERVHF_pro  | - |

|                         |           |           |             |   |
|-------------------------|-----------|-----------|-------------|---|
| Pan_paniscus_CM003386.1 | 71739251  | 71739601  | HERVHF_gag  | - |
| Pan_paniscus_CM003386.1 | 71741117  | 71741535  | HERVHF_3LTR | - |
| Pan_paniscus_CM003386.1 | 73317427  | 73317840  | HERVHF_5LTR | + |
| Pan_paniscus_CM003386.1 | 73319292  | 73319735  | HERVHF_gag  | + |
| Pan_paniscus_CM003386.1 | 73319822  | 73320592  | HERVHF_pro  | + |
| Pan_paniscus_CM003386.1 | 73320029  | 73322469  | HERVHF_pol  | + |
| Pan_paniscus_CM003386.1 | 73322864  | 73323269  | HERVHF_3LTR | + |
| Pan_paniscus_CM003386.1 | 92331191  | 92331609  | HERVHF_5LTR | + |
| Pan_paniscus_CM003386.1 | 92331739  | 92332161  | HERVHF_pro  | + |
| Pan_paniscus_CM003386.1 | 92332223  | 92333948  | HERVHF_pol  | + |
| Pan_paniscus_CM003386.1 | 92334558  | 92334985  | HERVHF_3LTR | + |
| Pan_paniscus_CM003386.1 | 171570100 | 171570422 | HERVHF_5LTR | - |
| Pan_paniscus_CM003386.1 | 171570832 | 171573166 | HERVHF_pol  | - |
| Pan_paniscus_CM003386.1 | 171572624 | 171573409 | HERVHF_pro  | - |
| Pan_paniscus_CM003386.1 | 171573505 | 171573903 | HERVHF_gag  | - |
| Pan_paniscus_CM003386.1 | 171575516 | 171575840 | HERVHF_3LTR | - |
| Pan_paniscus_CM003386.1 | 172503098 | 172503500 | HERVHF_5LTR | + |
| Pan_paniscus_CM003386.1 | 172505463 | 172506347 | HERVHF_pro  | + |
| Pan_paniscus_CM003386.1 | 172505754 | 172508079 | HERVHF_pol  | + |
| Pan_paniscus_CM003386.1 | 172508495 | 172508900 | HERVHF_3LTR | + |
| Pan_paniscus_CM003386.1 | 181554968 | 181555435 | HERVHF_5LTR | - |
| Pan_paniscus_CM003386.1 | 181556034 | 181557890 | HERVHF_pol  | - |
| Pan_paniscus_CM003386.1 | 181557420 | 181557911 | HERVHF_pro  | - |
| Pan_paniscus_CM003386.1 | 181558475 | 181558807 | HERVHF_gag  | - |
| Pan_paniscus_CM003386.1 | 181560252 | 181560706 | HERVHF_3LTR | - |
| Pan_paniscus_CM003387.1 | 16711924  | 16712236  | HERVHF_5LTR | + |
| Pan_paniscus_CM003387.1 | 16713670  | 16714071  | HERVHF_pro  | + |
| Pan_paniscus_CM003387.1 | 16714350  | 16716565  | HERVHF_pol  | + |
| Pan_paniscus_CM003387.1 | 16717070  | 16717372  | HERVHF_3LTR | + |
| Pan_paniscus_CM003387.1 | 89507156  | 89507618  | HERVHF_5LTR | + |
| Pan_paniscus_CM003387.1 | 89509074  | 89509409  | HERVHF_gag  | + |
| Pan_paniscus_CM003387.1 | 89509564  | 89509977  | HERVHF_pro  | + |
| Pan_paniscus_CM003387.1 | 89509710  | 89512097  | HERVHF_pol  | + |
| Pan_paniscus_CM003387.1 | 89512503  | 89512964  | HERVHF_3LTR | + |
| Pan_paniscus_CM003387.1 | 134221735 | 134222156 | HERVHF_5LTR | + |
| Pan_paniscus_CM003387.1 | 134223738 | 134224148 | HERVHF_gag  | + |
| Pan_paniscus_CM003387.1 | 134224474 | 134226537 | HERVHF_pol  | + |
| Pan_paniscus_CM003387.1 | 134227195 | 134227611 | HERVHF_3LTR | + |
| Pan_paniscus_CM003387.1 | 170818349 | 170818751 | HERVHF_5LTR | + |
| Pan_paniscus_CM003387.1 | 170820324 | 170820647 | HERVHF_gag  | + |
| Pan_paniscus_CM003387.1 | 170820441 | 170821427 | HERVHF_pro  | + |
| Pan_paniscus_CM003387.1 | 170820942 | 170823174 | HERVHF_pol  | + |
| Pan_paniscus_CM003387.1 | 170823626 | 170824030 | HERVHF_3LTR | + |
| Pan_paniscus_CM003387.1 | 174409788 | 174410202 | HERVHF_5LTR | + |

|                         |           |           |             |   |
|-------------------------|-----------|-----------|-------------|---|
| Pan_paniscus_CM003387.1 | 174412491 | 174413093 | HERVHF_pro  | + |
| Pan_paniscus_CM003387.1 | 174412665 | 174414588 | HERVHF_pol  | + |
| Pan_paniscus_CM003387.1 | 174415052 | 174415470 | HERVHF_3LTR | + |
| Pan_paniscus_CM003387.1 | 177422094 | 177422413 | HERVHF_5LTR | - |
| Pan_paniscus_CM003387.1 | 177423453 | 177425542 | HERVHF_pol  | - |
| Pan_paniscus_CM003387.1 | 177425135 | 177425716 | HERVHF_pro  | - |
| Pan_paniscus_CM003387.1 | 177426021 | 177426410 | HERVHF_gag  | - |
| Pan_paniscus_CM003387.1 | 177428007 | 177428307 | HERVHF_3LTR | - |
| Pan_paniscus_CM003387.1 | 190618163 | 190618530 | HERVHF_5LTR | - |
| Pan_paniscus_CM003387.1 | 190619077 | 190621270 | HERVHF_pol  | - |
| Pan_paniscus_CM003387.1 | 190621574 | 190621903 | HERVHF_gag  | - |
| Pan_paniscus_CM003387.1 | 190623406 | 190623775 | HERVHF_3LTR | - |
| Pan_paniscus_CM003388.1 | 9120093   | 9120404   | HERVHF_5LTR | - |
| Pan_paniscus_CM003388.1 | 9126494   | 9129236   | HERVHF_env  | - |
| Pan_paniscus_CM003388.1 | 9129946   | 9131597   | HERVHF_pol  | - |
| Pan_paniscus_CM003388.1 | 9130962   | 9131828   | HERVHF_pro  | - |
| Pan_paniscus_CM003388.1 | 9131921   | 9132232   | HERVHF_gag  | - |
| Pan_paniscus_CM003388.1 | 9132831   | 9133157   | HERVHF_3LTR | - |
| Pan_paniscus_CM003388.1 | 38957065  | 38957485  | HERVHF_5LTR | + |
| Pan_paniscus_CM003388.1 | 38959500  | 38960077  | HERVHF_gag  | + |
| Pan_paniscus_CM003388.1 | 38960309  | 38960923  | HERVHF_pro  | + |
| Pan_paniscus_CM003388.1 | 38960366  | 38962471  | HERVHF_pol  | + |
| Pan_paniscus_CM003388.1 | 38962870  | 38963226  | HERVHF_env  | + |
| Pan_paniscus_CM003388.1 | 38963391  | 38963805  | HERVHF_3LTR | + |
| Pan_paniscus_CM003388.1 | 63355162  | 63355627  | HERVK_5LTR  | - |
| Pan_paniscus_CM003388.1 | 63356196  | 63358233  | HERVK_pol   | - |
| Pan_paniscus_CM003388.1 | 63357691  | 63358941  | HERVK_pro   | - |
| Pan_paniscus_CM003388.1 | 63360391  | 63360861  | HERVK_3LTR  | - |
| Pan_paniscus_CM003388.1 | 99873896  | 99874304  | HERVHF_5LTR | - |
| Pan_paniscus_CM003388.1 | 99874498  | 99874890  | HERVHF_env  | - |
| Pan_paniscus_CM003388.1 | 99874953  | 99877220  | HERVHF_pol  | - |
| Pan_paniscus_CM003388.1 | 99876813  | 99877442  | HERVHF_pro  | - |
| Pan_paniscus_CM003388.1 | 99879566  | 99879970  | HERVHF_3LTR | - |
| Pan_paniscus_CM003388.1 | 114871205 | 114871716 | HERVK_5LTR  | + |
| Pan_paniscus_CM003388.1 | 114872485 | 114873393 | HERVK_pro   | + |
| Pan_paniscus_CM003388.1 | 114873288 | 114874091 | HERVK_pol   | + |
| Pan_paniscus_CM003388.1 | 114874934 | 114875305 | HERVK_env   | + |
| Pan_paniscus_CM003388.1 | 114875401 | 114875901 | HERVK_3LTR  | + |
| Pan_paniscus_CM003388.1 | 138266311 | 138266643 | HERVHF_5LTR | + |
| Pan_paniscus_CM003388.1 | 138268214 | 138268879 | HERVHF_gag  | + |
| Pan_paniscus_CM003388.1 | 138269385 | 138272908 | HERVHF_pol  | + |
| Pan_paniscus_CM003388.1 | 138273312 | 138274508 | HERVHF_env  | + |
| Pan_paniscus_CM003388.1 | 138274724 | 138275037 | HERVHF_3LTR | + |
| Pan_paniscus_CM003389.1 | 6043543   | 6043973   | HERVHF_5LTR | - |

|                         |           |           |                |   |
|-------------------------|-----------|-----------|----------------|---|
| Pan_paniscus_CM003389.1 | 6044582   | 6046582   | HERVHF_pol     | - |
| Pan_paniscus_CM003389.1 | 6045944   | 6046693   | HERVHF_pro     | - |
| Pan_paniscus_CM003389.1 | 6046801   | 6047190   | HERVHF_gag     | - |
| Pan_paniscus_CM003389.1 | 6048829   | 6049264   | HERVHF_3LTR    | - |
| Pan_paniscus_CM003389.1 | 31971373  | 31971776  | HERVIPADP_5LTR | - |
| Pan_paniscus_CM003389.1 | 31972106  | 31972857  | HERVIPADP_env  | - |
| Pan_paniscus_CM003389.1 | 31974314  | 31977462  | HERVIPADP_pol  | - |
| Pan_paniscus_CM003389.1 | 31978067  | 31978510  | HERVIPADP_gag  | - |
| Pan_paniscus_CM003389.1 | 31979893  | 31980304  | HERVIPADP_3LTR | - |
| Pan_paniscus_CM003389.1 | 52755394  | 52755838  | HERVHF_5LTR    | + |
| Pan_paniscus_CM003389.1 | 52758066  | 52759940  | HERVHF_pol     | + |
| Pan_paniscus_CM003389.1 | 52760743  | 52761193  | HERVHF_3LTR    | + |
| Pan_paniscus_CM003389.1 | 64544332  | 64544782  | HERVHF_5LTR    | + |
| Pan_paniscus_CM003389.1 | 64546400  | 64546720  | HERVHF_gag     | + |
| Pan_paniscus_CM003389.1 | 64546730  | 64547578  | HERVHF_pro     | + |
| Pan_paniscus_CM003389.1 | 64546979  | 64549037  | HERVHF_pol     | + |
| Pan_paniscus_CM003389.1 | 64549970  | 64550421  | HERVHF_3LTR    | + |
| Pan_paniscus_CM003389.1 | 66893105  | 66893471  | HERVHF_5LTR    | + |
| Pan_paniscus_CM003389.1 | 66894929  | 66895234  | HERVHF_gag     | + |
| Pan_paniscus_CM003389.1 | 66895224  | 66895649  | HERVHF_pro     | + |
| Pan_paniscus_CM003389.1 | 66895688  | 66898434  | HERVHF_pol     | + |
| Pan_paniscus_CM003389.1 | 66898515  | 66898877  | HERVHF_env     | + |
| Pan_paniscus_CM003389.1 | 66899036  | 66899401  | HERVHF_3LTR    | + |
| Pan_paniscus_CM003389.1 | 78789775  | 78790238  | HERVHF_5LTR    | - |
| Pan_paniscus_CM003389.1 | 78790406  | 78791573  | HERVHF_env     | - |
| Pan_paniscus_CM003389.1 | 78792592  | 78794935  | HERVHF_pol     | - |
| Pan_paniscus_CM003389.1 | 78794925  | 78795392  | HERVHF_pro     | - |
| Pan_paniscus_CM003389.1 | 78795453  | 78795773  | HERVHF_gag     | - |
| Pan_paniscus_CM003389.1 | 78797546  | 78798007  | HERVHF_3LTR    | - |
| Pan_paniscus_CM003389.1 | 111702202 | 111702625 | HERVHF_5LTR    | - |
| Pan_paniscus_CM003389.1 | 111703174 | 111705032 | HERVHF_pol     | - |
| Pan_paniscus_CM003389.1 | 111704625 | 111705206 | HERVHF_pro     | - |
| Pan_paniscus_CM003389.1 | 111707526 | 111707940 | HERVHF_3LTR    | - |
| Pan_paniscus_CM003389.1 | 116899530 | 116899890 | HERVHF_5LTR    | + |
| Pan_paniscus_CM003389.1 | 116902184 | 116902525 | HERVHF_pro     | + |
| Pan_paniscus_CM003389.1 | 116902587 | 116904377 | HERVHF_pol     | + |
| Pan_paniscus_CM003389.1 | 116904804 | 116905160 | HERVHF_3LTR    | + |
| Pan_paniscus_CM003389.1 | 133310916 | 133311273 | HERVHF_5LTR    | + |
| Pan_paniscus_CM003389.1 | 133312865 | 133313278 | HERVHF_gag     | + |
| Pan_paniscus_CM003389.1 | 133313285 | 133314118 | HERVHF_pro     | + |
| Pan_paniscus_CM003389.1 | 133313576 | 133314881 | HERVHF_pol     | + |
| Pan_paniscus_CM003389.1 | 133316106 | 133316471 | HERVHF_3LTR    | + |
| Pan_paniscus_CM003390.1 | 111230566 | 111231025 | HERVHF_5LTR    | - |
| Pan_paniscus_CM003390.1 | 111231976 | 111234050 | HERVHF_pol     | - |

|                         |           |           |               |   |
|-------------------------|-----------|-----------|---------------|---|
| Pan_paniscus_CM003390.1 | 111233786 | 111234451 | HERVHF_pro    | - |
| Pan_paniscus_CM003390.1 | 111236037 | 111236497 | HERVHF_3LTR   | - |
| Pan_paniscus_CM003390.1 | 127510252 | 127510704 | HERVHF_5LTR   | + |
| Pan_paniscus_CM003390.1 | 127512614 | 127512934 | HERVHF_gag    | + |
| Pan_paniscus_CM003390.1 | 127512941 | 127513525 | HERVHF_pro    | + |
| Pan_paniscus_CM003390.1 | 127513521 | 127515346 | HERVHF_pol    | + |
| Pan_paniscus_CM003390.1 | 127515768 | 127516220 | HERVHF_3LTR   | + |
| Pan_paniscus_CM003391.1 | 64069914  | 64070301  | HERVHF_5LTR   | + |
| Pan_paniscus_CM003391.1 | 64071974  | 64072306  | HERVHF_gag    | + |
| Pan_paniscus_CM003391.1 | 64072662  | 64073252  | HERVHF_pro    | + |
| Pan_paniscus_CM003391.1 | 64072863  | 64075524  | HERVHF_pol    | + |
| Pan_paniscus_CM003391.1 | 64076067  | 64076459  | HERVHF_env    | + |
| Pan_paniscus_CM003391.1 | 64076738  | 64077118  | HERVHF_3LTR   | + |
| Pan_paniscus_CM003391.1 | 131373330 | 131373744 | HERVHF_5LTR   | + |
| Pan_paniscus_CM003391.1 | 131375432 | 131375743 | HERVHF_gag    | + |
| Pan_paniscus_CM003391.1 | 131375886 | 131376596 | HERVHF_pro    | + |
| Pan_paniscus_CM003391.1 | 131376027 | 131378357 | HERVHF_pol    | + |
| Pan_paniscus_CM003391.1 | 131378808 | 131379220 | HERVHF_3LTR   | + |
| Pan_paniscus_CM003393.1 | 50814798  | 50815253  | HERVHF_5LTR   | - |
| Pan_paniscus_CM003393.1 | 50815675  | 50817615  | HERVHF_pol    | - |
| Pan_paniscus_CM003393.1 | 50820254  | 50820708  | HERVHF_3LTR   | - |
| Pan_paniscus_CM003393.1 | 54800482  | 54800818  | HERVHF_5LTR   | + |
| Pan_paniscus_CM003393.1 | 54802268  | 54802567  | HERVHF_gag    | + |
| Pan_paniscus_CM003393.1 | 54802620  | 54803396  | HERVHF_pro    | + |
| Pan_paniscus_CM003393.1 | 54803082  | 54804599  | HERVHF_pol    | + |
| Pan_paniscus_CM003393.1 | 54805495  | 54805832  | HERVHF_3LTR   | + |
| Pan_paniscus_CM003393.1 | 116502393 | 116502805 | HERVHF_5LTR   | + |
| Pan_paniscus_CM003393.1 | 116504480 | 116504860 | HERVHF_gag    | + |
| Pan_paniscus_CM003393.1 | 116504896 | 116505702 | HERVHF_pro    | + |
| Pan_paniscus_CM003393.1 | 116505181 | 116507425 | HERVHF_pol    | + |
| Pan_paniscus_CM003393.1 | 116507821 | 116508232 | HERVHF_3LTR   | + |
| Pan_paniscus_CM003394.1 | 14318115  | 14318551  | HERVHF_5LTR   | + |
| Pan_paniscus_CM003394.1 | 14319102  | 14321651  | HERVHF_pol    | + |
| Pan_paniscus_CM003394.1 | 14321968  | 14322327  | HERVHF_env    | + |
| Pan_paniscus_CM003394.1 | 14322493  | 14322919  | HERVHF_3LTR   | + |
| Pan_paniscus_CM003395.1 | 42157331  | 42157841  | HERVK_5LTR    | + |
| Pan_paniscus_CM003395.1 | 42158590  | 42159510  | HERVK_pro     | + |
| Pan_paniscus_CM003395.1 | 42159452  | 42161330  | HERVK_pol     | + |
| Pan_paniscus_CM003395.1 | 42161877  | 42162179  | HERVK_env     | + |
| Pan_paniscus_CM003395.1 | 42162257  | 42162768  | HERVK_3LTR    | + |
| Pan_paniscus_CM003395.1 | 60115240  | 60115546  | HSERVIII_5LTR | - |
| Pan_paniscus_CM003395.1 | 60118592  | 60119209  | HSERVIII_pol  | - |
| Pan_paniscus_CM003395.1 | 60120289  | 60120590  | HSERVIII_3LTR | - |
| Pan_paniscus_CM003395.1 | 70722833  | 70723247  | HERVK_5LTR    | - |

|                         |           |           |             |   |
|-------------------------|-----------|-----------|-------------|---|
| Pan_paniscus_CM003395.1 | 70725079  | 70725549  | HERVK_pol   | - |
| Pan_paniscus_CM003395.1 | 70725917  | 70726300  | HERVK_pro   | - |
| Pan_paniscus_CM003395.1 | 70727621  | 70728046  | HERVK_3LTR  | - |
| Pan_paniscus_CM003395.1 | 81413805  | 81414212  | HERVHF_5LTR | - |
| Pan_paniscus_CM003395.1 | 81414666  | 81416605  | HERVHF_pol  | - |
| Pan_paniscus_CM003395.1 | 81416228  | 81416779  | HERVHF_pro  | - |
| Pan_paniscus_CM003395.1 | 81419089  | 81419489  | HERVHF_3LTR | - |
| Pan_paniscus_CM003395.1 | 104196467 | 104197380 | HERVHF_5LTR | - |
| Pan_paniscus_CM003395.1 | 104198903 | 104200268 | HERVHF_pol  | - |
| Pan_paniscus_CM003395.1 | 104200183 | 104200851 | HERVHF_pro  | - |
| Pan_paniscus_CM003395.1 | 104200885 | 104201208 | HERVHF_gag  | - |
| Pan_paniscus_CM003395.1 | 104202964 | 104203881 | HERVHF_3LTR | - |
| Pan_paniscus_CM003395.1 | 115036283 | 115036712 | HERVHF_5LTR | + |
| Pan_paniscus_CM003395.1 | 115037925 | 115038479 | HERVHF_gag  | + |
| Pan_paniscus_CM003395.1 | 115038986 | 115039690 | HERVHF_pro  | + |
| Pan_paniscus_CM003395.1 | 115039034 | 115042346 | HERVHF_pol  | + |
| Pan_paniscus_CM003395.1 | 115044015 | 115044353 | HERVHF_env  | + |
| Pan_paniscus_CM003395.1 | 115044526 | 115044955 | HERVHF_3LTR | + |
| Pan_paniscus_CM003395.1 | 125949316 | 125949754 | HERVHF_5LTR | + |
| Pan_paniscus_CM003395.1 | 125950980 | 125951402 | HERVHF_gag  | + |
| Pan_paniscus_CM003395.1 | 125951987 | 125952625 | HERVHF_pro  | + |
| Pan_paniscus_CM003395.1 | 125952218 | 125954704 | HERVHF_pol  | + |
| Pan_paniscus_CM003395.1 | 125954993 | 125955694 | HERVHF_env  | + |
| Pan_paniscus_CM003395.1 | 125955858 | 125956291 | HERVHF_3LTR | + |
| Pan_paniscus_CM003396.1 | 48711478  | 48711832  | HERVHF_5LTR | - |
| Pan_paniscus_CM003396.1 | 48712381  | 48714932  | HERVHF_pol  | - |
| Pan_paniscus_CM003396.1 | 48714390  | 48715019  | HERVHF_pro  | - |
| Pan_paniscus_CM003396.1 | 48717000  | 48717345  | HERVHF_3LTR | - |
| Pan_paniscus_CM003396.1 | 60984609  | 60984917  | HERVHF_5LTR | + |
| Pan_paniscus_CM003396.1 | 60986475  | 60986807  | HERVHF_gag  | + |
| Pan_paniscus_CM003396.1 | 60987009  | 60987728  | HERVHF_pro  | + |
| Pan_paniscus_CM003396.1 | 60987525  | 60989707  | HERVHF_pol  | + |
| Pan_paniscus_CM003396.1 | 60990188  | 60990495  | HERVHF_3LTR | + |
| Pan_paniscus_CM003396.1 | 79539507  | 79539924  | HERVHF_5LTR | + |
| Pan_paniscus_CM003396.1 | 79541597  | 79541983  | HERVHF_gag  | + |
| Pan_paniscus_CM003396.1 | 79542285  | 79542836  | HERVHF_pro  | + |
| Pan_paniscus_CM003396.1 | 79542459  | 79544207  | HERVHF_pol  | + |
| Pan_paniscus_CM003396.1 | 79544833  | 79545247  | HERVHF_3LTR | + |
| Pan_paniscus_CM003397.1 | 19622222  | 19622633  | HERVHF_5LTR | + |
| Pan_paniscus_CM003397.1 | 19624000  | 19624428  | HERVHF_gag  | + |
| Pan_paniscus_CM003397.1 | 19624684  | 19625259  | HERVHF_pro  | + |
| Pan_paniscus_CM003397.1 | 19624864  | 19626693  | HERVHF_pol  | + |
| Pan_paniscus_CM003397.1 | 19627563  | 19627980  | HERVHF_3LTR | + |
| Pan_paniscus_CM003397.1 | 69756333  | 69756678  | HERVHF_5LTR | - |



|                         |                   |             |   |
|-------------------------|-------------------|-------------|---|
| Pan_paniscus_CM003397.1 | 69756849 69757445 | HERVHF_env  | - |
| Pan_paniscus_CM003397.1 | 69758896 69760681 | HERVHF_pol  | - |
| Pan_paniscus_CM003397.1 | 69761031 69761834 | HERVHF_pro  | - |
| Pan_paniscus_CM003397.1 | 69762243 69762770 | HERVHF_gag  | - |
| Pan_paniscus_CM003397.1 | 69764403 69764737 | HERVHF_3LTR | - |
| Pan_paniscus_CM003397.1 | 87207849 87208260 | HERVHF_5LTR | - |
| Pan_paniscus_CM003397.1 | 87209459 87210622 | HERVHF_pol  | - |
| Pan_paniscus_CM003397.1 | 87210171 87211406 | HERVHF_pro  | - |
| Pan_paniscus_CM003397.1 | 87211492 87211872 | HERVHF_gag  | - |
| Pan_paniscus_CM003397.1 | 87213535 87213944 | HERVHF_3LTR | - |
| Pan_paniscus_CM003397.1 | 98396543 98396956 | HERVHF_5LTR | - |
| Pan_paniscus_CM003397.1 | 98398165 98399805 | HERVHF_pol  | - |
| Pan_paniscus_CM003397.1 | 98401962 98402376 | HERVHF_3LTR | - |
| Pan_paniscus_CM003398.1 | 98460432 98460879 | HERVHF_5LTR | + |
| Pan_paniscus_CM003398.1 | 98462680 98463003 | HERVHF_gag  | + |
| Pan_paniscus_CM003398.1 | 98463010 98463861 | HERVHF_pro  | + |
| Pan_paniscus_CM003398.1 | 98463298 98465590 | HERVHF_pol  | + |
| Pan_paniscus_CM003398.1 | 98465999 98466446 | HERVHF_3LTR | + |
| Pan_paniscus_CM003402.1 | 20517739 20518189 | HERVHF_5LTR | - |
| Pan_paniscus_CM003402.1 | 20518355 20519530 | HERVHF_env  | - |
| Pan_paniscus_CM003402.1 | 20521208 20523502 | HERVHF_pol  | - |
| Pan_paniscus_CM003402.1 | 20523933 20524514 | HERVHF_gag  | - |
| Pan_paniscus_CM003402.1 | 20526390 20526847 | HERVHF_3LTR | - |
| Pan_paniscus_CM003402.1 | 23543185 23543571 | HERVK_5LTR  | - |
| Pan_paniscus_CM003402.1 | 23544480 23545745 | HERVK_pol   | - |
| Pan_paniscus_CM003402.1 | 23545640 23546497 | HERVK_pro   | - |
| Pan_paniscus_CM003402.1 | 23546159 23546671 | HERVK_gag   | - |
| Pan_paniscus_CM003402.1 | 23547428 23547815 | HERVK_3LTR  | - |
| Pan_paniscus_CM003402.1 | 51654384 51654729 | HERVHF_5LTR | - |
| Pan_paniscus_CM003402.1 | 51655812 51664386 | HERVHF_pol  | - |
| Pan_paniscus_CM003402.1 | 51664317 51664817 | HERVHF_pro  | - |
| Pan_paniscus_CM003402.1 | 51667167 51667506 | HERVHF_3LTR | - |
| Pan_paniscus_CM003402.1 | 52566336 52566768 | HERVHF_5LTR | - |
| Pan_paniscus_CM003402.1 | 52567187 52569244 | HERVHF_pol  | - |
| Pan_paniscus_CM003402.1 | 52568717 52569235 | HERVHF_pro  | - |
| Pan_paniscus_CM003402.1 | 52569591 52570031 | HERVHF_gag  | - |
| Pan_paniscus_CM003402.1 | 52571447 52571877 | HERVHF_3LTR | - |
| Pan_paniscus_CM003403.1 | 13303113 13303566 | HERVHF_5LTR | + |
| Pan_paniscus_CM003403.1 | 13305138 13305518 | HERVHF_gag  | + |
| Pan_paniscus_CM003403.1 | 13305581 13305973 | HERVHF_pro  | + |
| Pan_paniscus_CM003403.1 | 13306053 13307119 | HERVHF_pol  | + |
| Pan_paniscus_CM003403.1 | 13308359 13308812 | HERVHF_3LTR | + |
| Pan_paniscus_CM003404.1 | 16736640 16736970 | HERVHF_5LTR | + |
| Pan_paniscus_CM003404.1 | 16738558 16738887 | HERVHF_gag  | + |

|                            |           |           |                |   |
|----------------------------|-----------|-----------|----------------|---|
| Pan_paniscus_CM003404.1    | 16739142  | 16739723  | HERVHF_pro     | + |
| Pan_paniscus_CM003404.1    | 16739316  | 16741635  | HERVHF_pol     | + |
| Pan_paniscus_CM003404.1    | 16742060  | 16742381  | HERVHF_3LTR    | + |
| Pan_paniscus_CM003404.1    | 17002274  | 17002689  | HERVHF_5LTR    | + |
| Pan_paniscus_CM003404.1    | 17004399  | 17004719  | HERVHF_gag     | + |
| Pan_paniscus_CM003404.1    | 17004961  | 17005542  | HERVHF_pro     | + |
| Pan_paniscus_CM003404.1    | 17005300  | 17006454  | HERVHF_pol     | + |
| Pan_paniscus_CM003404.1    | 17007906  | 17008323  | HERVHF_3LTR    | + |
| Pan_paniscus_CM003404.1    | 40629858  | 40630310  | HERVHF_5LTR    | + |
| Pan_paniscus_CM003404.1    | 40631881  | 40632210  | HERVHF_gag     | + |
| Pan_paniscus_CM003404.1    | 40632322  | 40632702  | HERVHF_pro     | + |
| Pan_paniscus_CM003404.1    | 40632728  | 40634702  | HERVHF_pol     | + |
| Pan_paniscus_CM003404.1    | 40635111  | 40635563  | HERVHF_3LTR    | + |
| Pan_paniscus_CM003406.1    | 70583813  | 70584155  | HERVHF_5LTR    | + |
| Pan_paniscus_CM003406.1    | 70585780  | 70586097  | HERVHF_gag     | + |
| Pan_paniscus_CM003406.1    | 70586676  | 70587026  | HERVHF_pro     | + |
| Pan_paniscus_CM003406.1    | 70587028  | 70589078  | HERVHF_pol     | + |
| Pan_paniscus_CM003406.1    | 70590761  | 70591602  | HERVHF_env     | + |
| Pan_paniscus_CM003406.1    | 70591766  | 70592102  | HERVHF_3LTR    | + |
| Pan_paniscus_CM003406.1    | 98525053  | 98525456  | HERVHF_5LTR    | - |
| Pan_paniscus_CM003406.1    | 98525972  | 98527847  | HERVHF_pol     | - |
| Pan_paniscus_CM003406.1    | 98530365  | 98530767  | HERVHF_3LTR    | - |
| Pan_paniscus_CM003406.1    | 144706531 | 144706839 | HERVHF_5LTR    | - |
| Pan_paniscus_CM003406.1    | 144709237 | 144711610 | HERVHF_pol     | - |
| Pan_paniscus_CM003406.1    | 144712192 | 144712674 | HERVHF_gag     | - |
| Pan_paniscus_CM003406.1    | 144713882 | 144714196 | HERVHF_3LTR    | - |
| Pan_troglodytes_CM009238.2 | 14750808  | 14751323  | HERVK_5LTR     | - |
| Pan_troglodytes_CM009238.2 | 14752521  | 14754048  | HERVK_pol      | - |
| Pan_troglodytes_CM009238.2 | 14753946  | 14754887  | HERVK_pro      | - |
| Pan_troglodytes_CM009238.2 | 14756291  | 14756807  | HERVK_3LTR     | - |
| Pan_troglodytes_CM009238.2 | 21566932  | 21567356  | HERVHF_5LTR    | - |
| Pan_troglodytes_CM009238.2 | 21567530  | 21567874  | HERVHF_env     | - |
| Pan_troglodytes_CM009238.2 | 21569005  | 21571344  | HERVHF_pol     | - |
| Pan_troglodytes_CM009238.2 | 21571731  | 21572261  | HERVHF_gag     | - |
| Pan_troglodytes_CM009238.2 | 21573462  | 21573876  | HERVHF_3LTR    | - |
| Pan_troglodytes_CM009238.2 | 37209253  | 37209665  | HERVHF_5LTR    | + |
| Pan_troglodytes_CM009238.2 | 37211368  | 37211667  | HERVHF_gag     | + |
| Pan_troglodytes_CM009238.2 | 37211694  | 37212575  | HERVHF_pro     | + |
| Pan_troglodytes_CM009238.2 | 37211979  | 37214031  | HERVHF_pol     | + |
| Pan_troglodytes_CM009238.2 | 37214507  | 37214919  | HERVHF_3LTR    | + |
| Pan_troglodytes_CM009238.2 | 44560116  | 44560473  | HERVIPADP_5LTR | - |
| Pan_troglodytes_CM009238.2 | 44560634  | 44561194  | HERVIPADP_env  | - |
| Pan_troglodytes_CM009238.2 | 44563558  | 44565982  | HERVIPADP_pol  | - |
| Pan_troglodytes_CM009238.2 | 44566559  | 44566870  | HERVIPADP_gag  | - |

|                            |           |           |                |   |
|----------------------------|-----------|-----------|----------------|---|
| Pan_troglodytes_CM009238.2 | 44568939  | 44569296  | HERVIPADP_3LTR | - |
| Pan_troglodytes_CM009238.2 | 77834279  | 77834613  | HERVHF_5LTR    | + |
| Pan_troglodytes_CM009238.2 | 77836161  | 77836757  | HERVHF_gag     | + |
| Pan_troglodytes_CM009238.2 | 77836764  | 77837594  | HERVHF_pro     | + |
| Pan_troglodytes_CM009238.2 | 77837052  | 77839419  | HERVHF_pol     | + |
| Pan_troglodytes_CM009238.2 | 77841528  | 77842255  | HERVHF_env     | + |
| Pan_troglodytes_CM009238.2 | 77842573  | 77842909  | HERVHF_3LTR    | + |
| Pan_troglodytes_CM009238.2 | 80198633  | 80199085  | HERVHF_5LTR    | + |
| Pan_troglodytes_CM009238.2 | 80200976  | 80201299  | HERVHF_gag     | + |
| Pan_troglodytes_CM009238.2 | 80201392  | 80202135  | HERVHF_pro     | + |
| Pan_troglodytes_CM009238.2 | 80201638  | 80203538  | HERVHF_pol     | + |
| Pan_troglodytes_CM009238.2 | 80204131  | 80204583  | HERVHF_3LTR    | + |
| Pan_troglodytes_CM009238.2 | 115352053 | 115352403 | HERVHF_5LTR    | - |
| Pan_troglodytes_CM009238.2 | 115352619 | 115353056 | HERVHF_env     | - |
| Pan_troglodytes_CM009238.2 | 115354201 | 115356290 | HERVHF_pol     | - |
| Pan_troglodytes_CM009238.2 | 115356783 | 115357319 | HERVHF_gag     | - |
| Pan_troglodytes_CM009238.2 | 115357939 | 115358279 | HERVHF_3LTR    | - |
| Pan_troglodytes_CM009238.2 | 138623261 | 138623662 | HERVHF_5LTR    | + |
| Pan_troglodytes_CM009238.2 | 138625119 | 138625448 | HERVHF_gag     | + |
| Pan_troglodytes_CM009238.2 | 138625536 | 138626339 | HERVHF_pro     | + |
| Pan_troglodytes_CM009238.2 | 138625638 | 138627708 | HERVHF_pol     | + |
| Pan_troglodytes_CM009238.2 | 138628086 | 138628486 | HERVHF_3LTR    | + |
| Pan_troglodytes_CM009238.2 | 144716421 | 144716834 | HERVHF_5LTR    | + |
| Pan_troglodytes_CM009238.2 | 144718307 | 144718648 | HERVHF_gag     | + |
| Pan_troglodytes_CM009238.2 | 144718740 | 144719405 | HERVHF_pro     | + |
| Pan_troglodytes_CM009238.2 | 144719141 | 144720185 | HERVHF_pol     | + |
| Pan_troglodytes_CM009238.2 | 144721608 | 144722033 | HERVHF_3LTR    | + |
| Pan_troglodytes_CM009238.2 | 162872146 | 162872518 | HERVHF_5LTR    | - |
| Pan_troglodytes_CM009238.2 | 162873012 | 162875262 | HERVHF_pol     | - |
| Pan_troglodytes_CM009238.2 | 162874624 | 162875406 | HERVHF_pro     | - |
| Pan_troglodytes_CM009238.2 | 162875504 | 162875989 | HERVHF_gag     | - |
| Pan_troglodytes_CM009238.2 | 162877448 | 162877821 | HERVHF_3LTR    | - |
| Pan_troglodytes_CM009238.2 | 190610019 | 190610467 | HERVHF_5LTR    | - |
| Pan_troglodytes_CM009238.2 | 190610866 | 190612864 | HERVHF_pol     | - |
| Pan_troglodytes_CM009238.2 | 190612633 | 190613058 | HERVHF_pro     | - |
| Pan_troglodytes_CM009238.2 | 190613110 | 190613439 | HERVHF_gag     | - |
| Pan_troglodytes_CM009238.2 | 190615141 | 190615591 | HERVHF_3LTR    | - |
| Pan_troglodytes_CM009239.2 | 12525044  | 12525476  | HERVHF_5LTR    | + |
| Pan_troglodytes_CM009239.2 | 12527185  | 12527598  | HERVHF_gag     | + |
| Pan_troglodytes_CM009239.2 | 12527641  | 12528174  | HERVHF_pro     | + |
| Pan_troglodytes_CM009239.2 | 12528086  | 12529941  | HERVHF_pol     | + |
| Pan_troglodytes_CM009239.2 | 12530386  | 12530819  | HERVHF_3LTR    | + |
| Pan_troglodytes_CM009239.2 | 13113032  | 13113497  | HERVHF_5LTR    | - |
| Pan_troglodytes_CM009239.2 | 13114119  | 13116277  | HERVHF_pol     | - |

Pan\_troglodytes\_CM009239.2 13115684 13116433 HERVHF\_pro -  
 Pan\_troglodytes\_CM009239.2 13116552 13116932 HERVHF\_gag -  
 Pan\_troglodytes\_CM009239.2 13118548 13119025 HERVHF\_3LTR -  
 Pan\_troglodytes\_CM009239.2 35429108 35429534 HERVHF\_5LTR -  
 Pan\_troglodytes\_CM009239.2 35429923 35432244 HERVHF\_pol -  
 Pan\_troglodytes\_CM009239.2 35431705 35432286 HERVHF\_pro -  
 Pan\_troglodytes\_CM009239.2 35432569 35432877 HERVHF\_gag -  
 Pan\_troglodytes\_CM009239.2 35434361 35434797 HERVHF\_3LTR -  
 Pan\_troglodytes\_CM009239.2 41523267 41523698 HERVHF\_5LTR +  
 Pan\_troglodytes\_CM009239.2 41524480 41525843 HERVHF\_gag +  
 Pan\_troglodytes\_CM009239.2 41525853 41526383 HERVHF\_pro +  
 Pan\_troglodytes\_CM009239.2 41526833 41529798 HERVHF\_pol +  
 Pan\_troglodytes\_CM009239.2 41530046 41530498 HERVHF\_env +  
 Pan\_troglodytes\_CM009239.2 41530725 41531156 HERVHF\_3LTR +  
 Pan\_troglodytes\_CM009239.2 64388229 64388715 HERVHF\_5LTR +  
 Pan\_troglodytes\_CM009239.2 64390800 64391561 HERVHF\_pro +  
 Pan\_troglodytes\_CM009239.2 64391253 64392498 HERVHF\_pol +  
 Pan\_troglodytes\_CM009239.2 64392993 64393479 HERVHF\_3LTR +  
 Pan\_troglodytes\_CM009239.2 71315914 71316344 HERVHF\_5LTR -  
 Pan\_troglodytes\_CM009239.2 71316799 71319091 HERVHF\_pol -  
 Pan\_troglodytes\_CM009239.2 71318504 71319082 HERVHF\_pro -  
 Pan\_troglodytes\_CM009239.2 71319466 71319774 HERVHF\_gag -  
 Pan\_troglodytes\_CM009239.2 71321635 71322063 HERVHF\_3LTR -  
 Pan\_troglodytes\_CM009239.2 75368224 75368696 HERVHF\_5LTR -  
 Pan\_troglodytes\_CM009239.2 75369521 75371112 HERVHF\_pol -  
 Pan\_troglodytes\_CM009239.2 75373676 75374140 HERVHF\_3LTR -  
 Pan\_troglodytes\_CM009240.2 29064450 29064795 HERVHF\_5LTR -  
 Pan\_troglodytes\_CM009240.2 29065247 29067146 HERVHF\_pol -  
 Pan\_troglodytes\_CM009240.2 29066817 29067767 HERVHF\_pro -  
 Pan\_troglodytes\_CM009240.2 29067909 29068253 HERVHF\_gag -  
 Pan\_troglodytes\_CM009240.2 29070003 29070347 HERVHF\_3LTR -  
 Pan\_troglodytes\_CM009240.2 52263079 52263565 HERVHF\_5LTR -  
 Pan\_troglodytes\_CM009240.2 52263790 52264899 HERVHF\_env -  
 Pan\_troglodytes\_CM009240.2 52266088 52268861 HERVHF\_pol -  
 Pan\_troglodytes\_CM009240.2 52268313 52269155 HERVHF\_pro -  
 Pan\_troglodytes\_CM009240.2 52271238 52271719 HERVHF\_3LTR -  
 Pan\_troglodytes\_CM009240.2 74234862 74235332 HERVHF\_5LTR -  
 Pan\_troglodytes\_CM009240.2 74235725 74238201 HERVHF\_pol -  
 Pan\_troglodytes\_CM009240.2 74240594 74241046 HERVHF\_3LTR -  
 Pan\_troglodytes\_CM009240.2 74757458 74757872 HERVHF\_5LTR -  
 Pan\_troglodytes\_CM009240.2 74758705 74760769 HERVHF\_pol -  
 Pan\_troglodytes\_CM009240.2 74760398 74761201 HERVHF\_pro -  
 Pan\_troglodytes\_CM009240.2 74763063 74763476 HERVHF\_3LTR -  
 Pan\_troglodytes\_CM009240.2 78750171 78750603 HERVHF\_5LTR +

|                            |           |           |             |   |
|----------------------------|-----------|-----------|-------------|---|
| Pan_troglodytes_CM009240.2 | 78752798  | 78753361  | HERVHF_pro  | + |
| Pan_troglodytes_CM009240.2 | 78752837  | 78755147  | HERVHF_pol  | + |
| Pan_troglodytes_CM009240.2 | 78755359  | 78755804  | HERVHF_3LTR | + |
| Pan_troglodytes_CM009240.2 | 80728121  | 80728535  | HERVHF_5LTR | - |
| Pan_troglodytes_CM009240.2 | 80728930  | 80731275  | HERVHF_pol  | - |
| Pan_troglodytes_CM009240.2 | 80730607  | 80731449  | HERVHF_pro  | - |
| Pan_troglodytes_CM009240.2 | 80733561  | 80733973  | HERVHF_3LTR | - |
| Pan_troglodytes_CM009240.2 | 95493254  | 95493566  | HERVHF_5LTR | + |
| Pan_troglodytes_CM009240.2 | 95501288  | 95501893  | HERVHF_pro  | + |
| Pan_troglodytes_CM009240.2 | 95501627  | 95503719  | HERVHF_pol  | + |
| Pan_troglodytes_CM009240.2 | 95504545  | 95504853  | HERVHF_3LTR | + |
| Pan_troglodytes_CM009240.2 | 101742731 | 101743068 | HERVHF_5LTR | + |
| Pan_troglodytes_CM009240.2 | 101744502 | 101744825 | HERVHF_gag  | + |
| Pan_troglodytes_CM009240.2 | 101745246 | 101747100 | HERVHF_pol  | + |
| Pan_troglodytes_CM009240.2 | 101748456 | 101748796 | HERVHF_3LTR | + |
| Pan_troglodytes_CM009241.2 | 1462834   | 1463307   | HERVHF_5LTR | - |
| Pan_troglodytes_CM009241.2 | 1463607   | 1463921   | HERVHF_env  | - |
| Pan_troglodytes_CM009241.2 | 1464126   | 1464938   | HERVHF_pol  | - |
| Pan_troglodytes_CM009241.2 | 1464303   | 1465049   | HERVHF_pro  | - |
| Pan_troglodytes_CM009241.2 | 1465136   | 1465549   | HERVHF_gag  | - |
| Pan_troglodytes_CM009241.2 | 1466558   | 1467032   | HERVHF_3LTR | - |
| Pan_troglodytes_CM009241.2 | 32279764  | 32280095  | HERVHF_5LTR | + |
| Pan_troglodytes_CM009241.2 | 32280748  | 32282367  | HERVHF_gag  | + |
| Pan_troglodytes_CM009241.2 | 32282871  | 32285200  | HERVHF_pol  | + |
| Pan_troglodytes_CM009241.2 | 32287195  | 32287905  | HERVHF_env  | + |
| Pan_troglodytes_CM009241.2 | 32288072  | 32288414  | HERVHF_3LTR | + |
| Pan_troglodytes_CM009241.2 | 46625604  | 46626044  | HERVHF_5LTR | - |
| Pan_troglodytes_CM009241.2 | 46626213  | 46626641  | HERVHF_env  | - |
| Pan_troglodytes_CM009241.2 | 46627433  | 46628563  | HERVHF_pol  | - |
| Pan_troglodytes_CM009241.2 | 46628962  | 46629952  | HERVHF_gag  | - |
| Pan_troglodytes_CM009241.2 | 46630870  | 46631311  | HERVHF_3LTR | - |
| Pan_troglodytes_CM009241.2 | 90690741  | 90691165  | HERVHF_5LTR | + |
| Pan_troglodytes_CM009241.2 | 90691295  | 90691717  | HERVHF_pro  | + |
| Pan_troglodytes_CM009241.2 | 90691779  | 90693071  | HERVHF_pol  | + |
| Pan_troglodytes_CM009241.2 | 90694114  | 90694544  | HERVHF_3LTR | + |
| Pan_troglodytes_CM009241.2 | 92080444  | 92080826  | HERVHF_5LTR | + |
| Pan_troglodytes_CM009241.2 | 92082093  | 92082671  | HERVHF_gag  | + |
| Pan_troglodytes_CM009241.2 | 92082741  | 92083469  | HERVHF_pro  | + |
| Pan_troglodytes_CM009241.2 | 92083463  | 92085319  | HERVHF_pol  | + |
| Pan_troglodytes_CM009241.2 | 92086057  | 92086451  | HERVHF_3LTR | + |
| Pan_troglodytes_CM009241.2 | 139295989 | 139296396 | HERVHF_5LTR | + |
| Pan_troglodytes_CM009241.2 | 139298062 | 139298382 | HERVHF_gag  | + |
| Pan_troglodytes_CM009241.2 | 139298793 | 139300043 | HERVHF_pol  | + |
| Pan_troglodytes_CM009241.2 | 139301284 | 139302096 | HERVHF_env  | + |

|                            |           |           |               |   |
|----------------------------|-----------|-----------|---------------|---|
| Pan_troglodytes_CM009241.2 | 139302265 | 139302672 | HERVHF_3LTR   | + |
| Pan_troglodytes_CM009241.2 | 141883502 | 141883963 | HERVHF_5LTR   | + |
| Pan_troglodytes_CM009241.2 | 141886141 | 141889768 | HERVHF_pol    | + |
| Pan_troglodytes_CM009241.2 | 141890631 | 141891299 | HERVHF_env    | + |
| Pan_troglodytes_CM009241.2 | 141891515 | 141891966 | HERVHF_3LTR   | + |
| Pan_troglodytes_CM009241.2 | 143633585 | 143633996 | HERVHF_5LTR   | - |
| Pan_troglodytes_CM009241.2 | 143634391 | 143636452 | HERVHF_pol    | - |
| Pan_troglodytes_CM009241.2 | 143636835 | 143637221 | HERVHF_gag    | - |
| Pan_troglodytes_CM009241.2 | 143638884 | 143639296 | HERVHF_3LTR   | - |
| Pan_troglodytes_CM009241.2 | 164861687 | 164862106 | HERVHF_5LTR   | - |
| Pan_troglodytes_CM009241.2 | 164862272 | 164863087 | HERVHF_env    | - |
| Pan_troglodytes_CM009241.2 | 164864221 | 164865997 | HERVHF_pol    | - |
| Pan_troglodytes_CM009241.2 | 164865919 | 164866437 | HERVHF_pro    | - |
| Pan_troglodytes_CM009241.2 | 164866491 | 164866874 | HERVHF_gag    | - |
| Pan_troglodytes_CM009241.2 | 164868413 | 164868832 | HERVHF_3LTR   | - |
| Pan_troglodytes_CM009241.2 | 173911128 | 173911570 | HERVHF_5LTR   | + |
| Pan_troglodytes_CM009241.2 | 173913307 | 173913627 | HERVHF_gag    | + |
| Pan_troglodytes_CM009241.2 | 173913634 | 173914380 | HERVHF_pro    | + |
| Pan_troglodytes_CM009241.2 | 173913814 | 173916975 | HERVHF_pol    | + |
| Pan_troglodytes_CM009241.2 | 173918105 | 173919043 | HERVHF_env    | + |
| Pan_troglodytes_CM009241.2 | 173919209 | 173919660 | HERVHF_3LTR   | + |
| Pan_troglodytes_CM009241.2 | 174415624 | 174416091 | HERVHF_5LTR   | - |
| Pan_troglodytes_CM009241.2 | 174416705 | 174418573 | HERVHF_pol    | - |
| Pan_troglodytes_CM009241.2 | 174418910 | 174419209 | HERVHF_gag    | - |
| Pan_troglodytes_CM009241.2 | 174420913 | 174421367 | HERVHF_3LTR   | - |
| Pan_troglodytes_CM009241.2 | 190137979 | 190138376 | HERVHF_5LTR   | - |
| Pan_troglodytes_CM009241.2 | 190138835 | 190140793 | HERVHF_pol    | - |
| Pan_troglodytes_CM009241.2 | 190140572 | 190141165 | HERVHF_pro    | - |
| Pan_troglodytes_CM009241.2 | 190141253 | 190141657 | HERVHF_gag    | - |
| Pan_troglodytes_CM009241.2 | 190143452 | 190143827 | HERVHF_3LTR   | - |
| Pan_troglodytes_CM009242.2 | 16486852  | 16487164  | HERVHF_5LTR   | + |
| Pan_troglodytes_CM009242.2 | 16488606  | 16489007  | HERVHF_pro    | + |
| Pan_troglodytes_CM009242.2 | 16489286  | 16491501  | HERVHF_pol    | + |
| Pan_troglodytes_CM009242.2 | 16492006  | 16492308  | HERVHF_3LTR   | + |
| Pan_troglodytes_CM009242.2 | 20105392  | 20105805  | HERVHF_5LTR   | - |
| Pan_troglodytes_CM009242.2 | 20106639  | 20108829  | HERVHF_pol    | - |
| Pan_troglodytes_CM009242.2 | 20108709  | 20109155  | HERVHF_pro    | - |
| Pan_troglodytes_CM009242.2 | 20109189  | 20109737  | HERVHF_gag    | - |
| Pan_troglodytes_CM009242.2 | 20111198  | 20111602  | HERVHF_3LTR   | - |
| Pan_troglodytes_CM009242.2 | 22947188  | 22947531  | HSERVIII_5LTR | - |
| Pan_troglodytes_CM009242.2 | 22948533  | 22951311  | HSERVIII_pol  | - |
| Pan_troglodytes_CM009242.2 | 22953257  | 22953611  | HSERVIII_3LTR | - |
| Pan_troglodytes_CM009242.2 | 45372134  | 45372619  | HERVHF_5LTR   | + |
| Pan_troglodytes_CM009242.2 | 45374030  | 45374503  | HERVHF_gag    | + |

|                            |           |           |             |   |
|----------------------------|-----------|-----------|-------------|---|
| Pan_troglodytes_CM009242.2 | 45374904  | 45376158  | HERVHF_pol  | + |
| Pan_troglodytes_CM009242.2 | 45376527  | 45377014  | HERVHF_3LTR | + |
| Pan_troglodytes_CM009242.2 | 83939130  | 83939592  | HERVHF_5LTR | + |
| Pan_troglodytes_CM009242.2 | 83941046  | 83941486  | HERVHF_gag  | + |
| Pan_troglodytes_CM009242.2 | 83941476  | 83941907  | HERVHF_pro  | + |
| Pan_troglodytes_CM009242.2 | 83941952  | 83943679  | HERVHF_pol  | + |
| Pan_troglodytes_CM009242.2 | 83944481  | 83944942  | HERVHF_3LTR | + |
| Pan_troglodytes_CM009242.2 | 85376352  | 85376704  | HERVHF_5LTR | + |
| Pan_troglodytes_CM009242.2 | 85378472  | 85378795  | HERVHF_gag  | + |
| Pan_troglodytes_CM009242.2 | 85378918  | 85379364  | HERVHF_pro  | + |
| Pan_troglodytes_CM009242.2 | 85379313  | 85381306  | HERVHF_pol  | + |
| Pan_troglodytes_CM009242.2 | 85381710  | 85382072  | HERVHF_3LTR | + |
| Pan_troglodytes_CM009242.2 | 114886748 | 114887164 | HERVHF_5LTR | + |
| Pan_troglodytes_CM009242.2 | 114888937 | 114889236 | HERVHF_gag  | + |
| Pan_troglodytes_CM009242.2 | 114889315 | 114889707 | HERVHF_pro  | + |
| Pan_troglodytes_CM009242.2 | 114889686 | 114891237 | HERVHF_pol  | + |
| Pan_troglodytes_CM009242.2 | 114891703 | 114892067 | HERVHF_env  | + |
| Pan_troglodytes_CM009242.2 | 114892074 | 114892486 | HERVHF_3LTR | + |
| Pan_troglodytes_CM009242.2 | 126022104 | 126022516 | HERVHF_5LTR | - |
| Pan_troglodytes_CM009242.2 | 126022956 | 126024838 | HERVHF_pol  | - |
| Pan_troglodytes_CM009242.2 | 126024625 | 126025320 | HERVHF_pro  | - |
| Pan_troglodytes_CM009242.2 | 126027388 | 126027798 | HERVHF_3LTR | - |
| Pan_troglodytes_CM009242.2 | 153180271 | 153180724 | HERVHF_5LTR | - |
| Pan_troglodytes_CM009242.2 | 153181172 | 153183297 | HERVHF_pol  | - |
| Pan_troglodytes_CM009242.2 | 153183752 | 153184132 | HERVHF_gag  | - |
| Pan_troglodytes_CM009242.2 | 153185802 | 153186257 | HERVHF_3LTR | - |
| Pan_troglodytes_CM009242.2 | 160681352 | 160681753 | HERVHF_5LTR | + |
| Pan_troglodytes_CM009242.2 | 160683210 | 160683692 | HERVHF_gag  | + |
| Pan_troglodytes_CM009242.2 | 160683799 | 160684122 | HERVHF_pro  | + |
| Pan_troglodytes_CM009242.2 | 160684139 | 160686050 | HERVHF_pol  | + |
| Pan_troglodytes_CM009242.2 | 160686495 | 160686898 | HERVHF_3LTR | + |
| Pan_troglodytes_CM009242.2 | 161071575 | 161071945 | HERVHF_5LTR | - |
| Pan_troglodytes_CM009242.2 | 161073416 | 161075415 | HERVHF_pol  | - |
| Pan_troglodytes_CM009242.2 | 161075534 | 161075909 | HERVHF_3LTR | - |
| Pan_troglodytes_CM009242.2 | 177656988 | 177657403 | HERVHF_5LTR | + |
| Pan_troglodytes_CM009242.2 | 177659045 | 177659356 | HERVHF_gag  | + |
| Pan_troglodytes_CM009242.2 | 177659474 | 177660397 | HERVHF_pro  | + |
| Pan_troglodytes_CM009242.2 | 177659642 | 177662143 | HERVHF_pol  | + |
| Pan_troglodytes_CM009242.2 | 177662961 | 177663373 | HERVHF_3LTR | + |
| Pan_troglodytes_CM009242.2 | 180788890 | 180789320 | HERVHF_5LTR | + |
| Pan_troglodytes_CM009242.2 | 180791231 | 180791626 | HERVHF_gag  | + |
| Pan_troglodytes_CM009242.2 | 180791895 | 180792458 | HERVHF_pro  | + |
| Pan_troglodytes_CM009242.2 | 180792069 | 180792596 | HERVHF_pol  | + |
| Pan_troglodytes_CM009242.2 | 180793134 | 180793563 | HERVHF_3LTR | + |

|                            |           |           |             |   |
|----------------------------|-----------|-----------|-------------|---|
| Pan_troglodytes_CM009242.2 | 184193964 | 184194331 | HERVHF_5LTR | - |
| Pan_troglodytes_CM009242.2 | 184194878 | 184197017 | HERVHF_pol  | - |
| Pan_troglodytes_CM009242.2 | 184197375 | 184197812 | HERVHF_gag  | - |
| Pan_troglodytes_CM009242.2 | 184199208 | 184199577 | HERVHF_3LTR | - |
| Pan_troglodytes_CM009243.2 | 6962082   | 6962467   | HERVHF_5LTR | - |
| Pan_troglodytes_CM009243.2 | 6962971   | 6963393   | HERVHF_env  | - |
| Pan_troglodytes_CM009243.2 | 6963726   | 6966789   | HERVHF_pol  | - |
| Pan_troglodytes_CM009243.2 | 6966289   | 6967161   | HERVHF_pro  | - |
| Pan_troglodytes_CM009243.2 | 6969019   | 6969412   | HERVHF_3LTR | - |
| Pan_troglodytes_CM009243.2 | 37942039  | 37942464  | HERVHF_5LTR | + |
| Pan_troglodytes_CM009243.2 | 37944955  | 37945532  | HERVHF_gag  | + |
| Pan_troglodytes_CM009243.2 | 37945821  | 37947833  | HERVHF_pol  | + |
| Pan_troglodytes_CM009243.2 | 37948334  | 37948681  | HERVHF_env  | + |
| Pan_troglodytes_CM009243.2 | 37948846  | 37949262  | HERVHF_3LTR | + |
| Pan_troglodytes_CM009243.2 | 91835789  | 91836300  | HERVK_5LTR  | + |
| Pan_troglodytes_CM009243.2 | 91837069  | 91837923  | HERVK_pro   | + |
| Pan_troglodytes_CM009243.2 | 91837872  | 91839182  | HERVK_pol   | + |
| Pan_troglodytes_CM009243.2 | 91839480  | 91839860  | HERVK_env   | + |
| Pan_troglodytes_CM009243.2 | 91839979  | 91840482  | HERVK_3LTR  | + |
| Pan_troglodytes_CM009243.2 | 114924886 | 114925218 | HERVHF_5LTR | + |
| Pan_troglodytes_CM009243.2 | 114926830 | 114927414 | HERVHF_gag  | + |
| Pan_troglodytes_CM009243.2 | 114927956 | 114931478 | HERVHF_pol  | + |
| Pan_troglodytes_CM009243.2 | 114931882 | 114933078 | HERVHF_env  | + |
| Pan_troglodytes_CM009243.2 | 114933297 | 114933610 | HERVHF_3LTR | + |
| Pan_troglodytes_CM009243.2 | 139386807 | 139387232 | HERVHF_5LTR | + |
| Pan_troglodytes_CM009243.2 | 139387773 | 139388093 | HERVHF_gag  | + |
| Pan_troglodytes_CM009243.2 | 139388334 | 139388936 | HERVHF_pro  | + |
| Pan_troglodytes_CM009243.2 | 139388349 | 139390844 | HERVHF_pol  | + |
| Pan_troglodytes_CM009243.2 | 139395579 | 139396000 | HERVHF_3LTR | + |
| Pan_troglodytes_CM009243.2 | 140400986 | 140401399 | HERVHF_5LTR | - |
| Pan_troglodytes_CM009243.2 | 140401992 | 140403731 | HERVHF_pol  | - |
| Pan_troglodytes_CM009243.2 | 140403395 | 140404171 | HERVHF_pro  | - |
| Pan_troglodytes_CM009243.2 | 140406305 | 140406718 | HERVHF_3LTR | - |
| Pan_troglodytes_CM009243.2 | 141465093 | 141465466 | HERVHF_5LTR | + |
| Pan_troglodytes_CM009243.2 | 141467288 | 141468154 | HERVHF_pro  | + |
| Pan_troglodytes_CM009243.2 | 141467693 | 141469407 | HERVHF_pol  | + |
| Pan_troglodytes_CM009243.2 | 141470344 | 141470769 | HERVHF_env  | + |
| Pan_troglodytes_CM009243.2 | 141470951 | 141471318 | HERVHF_3LTR | + |
| Pan_troglodytes_CM009243.2 | 149142400 | 149142774 | HERVHF_5LTR | - |
| Pan_troglodytes_CM009243.2 | 149143666 | 149146155 | HERVHF_pol  | - |
| Pan_troglodytes_CM009243.2 | 149145610 | 149146335 | HERVHF_pro  | - |
| Pan_troglodytes_CM009243.2 | 149146451 | 149146852 | HERVHF_gag  | - |
| Pan_troglodytes_CM009243.2 | 149150185 | 149150573 | HERVHF_3LTR | - |
| Pan_troglodytes_CM009244.2 | 40382429  | 40382862  | HERVHF_5LTR | - |



|                            |           |           |             |   |
|----------------------------|-----------|-----------|-------------|---|
| Pan_troglodytes_CM009244.2 | 40383023  | 40384206  | HERVHF_env  | - |
| Pan_troglodytes_CM009244.2 | 40384601  | 40388132  | HERVHF_pol  | - |
| Pan_troglodytes_CM009244.2 | 40388500  | 40389090  | HERVHF_gag  | - |
| Pan_troglodytes_CM009244.2 | 40389352  | 40389785  | HERVHF_3LTR | - |
| Pan_troglodytes_CM009244.2 | 61336194  | 61336560  | HERVHF_5LTR | + |
| Pan_troglodytes_CM009244.2 | 61338020  | 61338325  | HERVHF_gag  | + |
| Pan_troglodytes_CM009244.2 | 61338788  | 61341522  | HERVHF_pol  | + |
| Pan_troglodytes_CM009244.2 | 61341631  | 61341966  | HERVHF_env  | + |
| Pan_troglodytes_CM009244.2 | 61342125  | 61342490  | HERVHF_3LTR | + |
| Pan_troglodytes_CM009244.2 | 110656184 | 110656522 | HERVK_5LTR  | - |
| Pan_troglodytes_CM009244.2 | 110657893 | 110659377 | HERVK_pol   | - |
| Pan_troglodytes_CM009244.2 | 110659272 | 110660198 | HERVK_pro   | - |
| Pan_troglodytes_CM009244.2 | 110660763 | 110661087 | HERVK_3LTR  | - |
| Pan_troglodytes_CM009244.2 | 115036889 | 115037328 | HERVHF_5LTR | - |
| Pan_troglodytes_CM009244.2 | 115038199 | 115040877 | HERVHF_pol  | - |
| Pan_troglodytes_CM009244.2 | 115040083 | 115041012 | HERVHF_pro  | - |
| Pan_troglodytes_CM009244.2 | 115042852 | 115043289 | HERVHF_3LTR | - |
| Pan_troglodytes_CM009244.2 | 128701675 | 128702132 | HERVHF_5LTR | + |
| Pan_troglodytes_CM009244.2 | 128704313 | 128705143 | HERVHF_pro  | + |
| Pan_troglodytes_CM009244.2 | 128704601 | 128706678 | HERVHF_pol  | + |
| Pan_troglodytes_CM009244.2 | 128707127 | 128707578 | HERVHF_3LTR | + |
| Pan_troglodytes_CM009244.2 | 134387840 | 134388217 | HERVHF_5LTR | - |
| Pan_troglodytes_CM009244.2 | 134388666 | 134391538 | HERVHF_pol  | - |
| Pan_troglodytes_CM009244.2 | 134390951 | 134391730 | HERVHF_pro  | - |
| Pan_troglodytes_CM009244.2 | 134393987 | 134394359 | HERVHF_3LTR | - |
| Pan_troglodytes_CM009245.2 | 12697826  | 12698209  | HERVHF_5LTR | - |
| Pan_troglodytes_CM009245.2 | 12699835  | 12701404  | HERVHF_pol  | - |
| Pan_troglodytes_CM009245.2 | 12701621  | 12702064  | HERVHF_pro  | - |
| Pan_troglodytes_CM009245.2 | 12702808  | 12703797  | HERVHF_gag  | - |
| Pan_troglodytes_CM009245.2 | 12704233  | 12704602  | HERVHF_3LTR | - |
| Pan_troglodytes_CM009245.2 | 20653816  | 20654225  | HERVHF_5LTR | + |
| Pan_troglodytes_CM009245.2 | 20655282  | 20657533  | HERVHF_pol  | + |
| Pan_troglodytes_CM009245.2 | 20658403  | 20658816  | HERVHF_3LTR | + |
| Pan_troglodytes_CM009245.2 | 29890095  | 29890498  | HERVHF_5LTR | + |
| Pan_troglodytes_CM009245.2 | 29892100  | 29892399  | HERVHF_gag  | + |
| Pan_troglodytes_CM009245.2 | 29892429  | 29893256  | HERVHF_pro  | + |
| Pan_troglodytes_CM009245.2 | 29892675  | 29894988  | HERVHF_pol  | + |
| Pan_troglodytes_CM009245.2 | 29896524  | 29896976  | HERVHF_env  | + |
| Pan_troglodytes_CM009245.2 | 29897242  | 29897642  | HERVHF_3LTR | + |
| Pan_troglodytes_CM009245.2 | 32920766  | 32921207  | HERVHF_5LTR | - |
| Pan_troglodytes_CM009245.2 | 32922185  | 32922849  | HERVHF_pol  | - |
| Pan_troglodytes_CM009245.2 | 32922481  | 32923059  | HERVHF_pro  | - |
| Pan_troglodytes_CM009245.2 | 32923213  | 32923596  | HERVHF_gag  | - |
| Pan_troglodytes_CM009245.2 | 32925114  | 32925558  | HERVHF_3LTR | - |

|                            |           |           |             |   |
|----------------------------|-----------|-----------|-------------|---|
| Pan_troglodytes_CM009245.2 | 73374589  | 73374893  | HERVHF_5LTR | + |
| Pan_troglodytes_CM009245.2 | 73376824  | 73377546  | HERVHF_pro  | + |
| Pan_troglodytes_CM009245.2 | 73376983  | 73378855  | HERVHF_pol  | + |
| Pan_troglodytes_CM009245.2 | 73380060  | 73380384  | HERVHF_3LTR | + |
| Pan_troglodytes_CM009245.2 | 138459300 | 138459703 | HERVHF_5LTR | - |
| Pan_troglodytes_CM009245.2 | 138460555 | 138463011 | HERVHF_pol  | - |
| Pan_troglodytes_CM009245.2 | 138462472 | 138463056 | HERVHF_pro  | - |
| Pan_troglodytes_CM009245.2 | 138463353 | 138463709 | HERVHF_gag  | - |
| Pan_troglodytes_CM009245.2 | 138465271 | 138465658 | HERVHF_3LTR | - |
| Pan_troglodytes_CM009246.2 | 63934436  | 63934798  | HERVHF_5LTR | + |
| Pan_troglodytes_CM009246.2 | 63936516  | 63936848  | HERVHF_gag  | + |
| Pan_troglodytes_CM009246.2 | 63937204  | 63937794  | HERVHF_pro  | + |
| Pan_troglodytes_CM009246.2 | 63937405  | 63940066  | HERVHF_pol  | + |
| Pan_troglodytes_CM009246.2 | 63940554  | 63941003  | HERVHF_env  | + |
| Pan_troglodytes_CM009246.2 | 63941283  | 63941648  | HERVHF_3LTR | + |
| Pan_troglodytes_CM009246.2 | 80012945  | 80013323  | HERVHF_5LTR | - |
| Pan_troglodytes_CM009246.2 | 80013565  | 80013930  | HERVHF_env  | - |
| Pan_troglodytes_CM009246.2 | 80014307  | 80016295  | HERVHF_pol  | - |
| Pan_troglodytes_CM009246.2 | 80015969  | 80016523  | HERVHF_pro  | - |
| Pan_troglodytes_CM009246.2 | 80016721  | 80017047  | HERVHF_gag  | - |
| Pan_troglodytes_CM009246.2 | 80018488  | 80018863  | HERVHF_3LTR | - |
| Pan_troglodytes_CM009246.2 | 113203990 | 113204442 | HERVHF_5LTR | + |
| Pan_troglodytes_CM009246.2 | 113206133 | 113206453 | HERVHF_gag  | + |
| Pan_troglodytes_CM009246.2 | 113206505 | 113207260 | HERVHF_pro  | + |
| Pan_troglodytes_CM009246.2 | 113206703 | 113208872 | HERVHF_pol  | + |
| Pan_troglodytes_CM009246.2 | 113209282 | 113209734 | HERVHF_3LTR | + |
| Pan_troglodytes_CM009247.2 | 90767505  | 90767981  | HERVHF_5LTR | - |
| Pan_troglodytes_CM009247.2 | 90768567  | 90770607  | HERVHF_pol  | - |
| Pan_troglodytes_CM009247.2 | 90770604  | 90771011  | HERVHF_pro  | - |
| Pan_troglodytes_CM009247.2 | 90771054  | 90771563  | HERVHF_gag  | - |
| Pan_troglodytes_CM009247.2 | 90773151  | 90773627  | HERVHF_3LTR | - |
| Pan_troglodytes_CM009247.2 | 94068547  | 94068999  | HERVHF_5LTR | + |
| Pan_troglodytes_CM009247.2 | 94070890  | 94071447  | HERVHF_gag  | + |
| Pan_troglodytes_CM009247.2 | 94071568  | 94072398  | HERVHF_pro  | + |
| Pan_troglodytes_CM009247.2 | 94071856  | 94073916  | HERVHF_pol  | + |
| Pan_troglodytes_CM009247.2 | 94074401  | 94074916  | HERVHF_env  | + |
| Pan_troglodytes_CM009247.2 | 94075080  | 94075541  | HERVHF_3LTR | + |
| Pan_troglodytes_CM009248.2 | 51834005  | 51834341  | HERVHF_5LTR | + |
| Pan_troglodytes_CM009248.2 | 51835791  | 51836090  | HERVHF_gag  | + |
| Pan_troglodytes_CM009248.2 | 51836143  | 51836919  | HERVHF_pro  | + |
| Pan_troglodytes_CM009248.2 | 51836515  | 51838122  | HERVHF_pol  | + |
| Pan_troglodytes_CM009248.2 | 51839020  | 51839357  | HERVHF_3LTR | + |
| Pan_troglodytes_CM009248.2 | 86261866  | 86262283  | HERVHF_5LTR | + |
| Pan_troglodytes_CM009248.2 | 86264792  | 86265265  | HERVHF_pro  | + |

|                            |           |           |             |   |
|----------------------------|-----------|-----------|-------------|---|
| Pan_troglodytes_CM009248.2 | 86264843  | 86266781  | HERVHF_pol  | + |
| Pan_troglodytes_CM009248.2 | 86267373  | 86267795  | HERVHF_3LTR | + |
| Pan_troglodytes_CM009248.2 | 129096374 | 129096811 | HERVHF_5LTR | + |
| Pan_troglodytes_CM009248.2 | 129098732 | 129099061 | HERVHF_gag  | + |
| Pan_troglodytes_CM009248.2 | 129099202 | 129099978 | HERVHF_pro  | + |
| Pan_troglodytes_CM009248.2 | 129099400 | 129100677 | HERVHF_pol  | + |
| Pan_troglodytes_CM009248.2 | 129101086 | 129101533 | HERVHF_3LTR | + |
| Pan_troglodytes_CM009249.2 | 4160623   | 4161616   | HERVHF_5LTR | - |
| Pan_troglodytes_CM009249.2 | 4165183   | 4167126   | HERVHF_pol  | - |
| Pan_troglodytes_CM009249.2 | 4167117   | 4167497   | HERVHF_pro  | - |
| Pan_troglodytes_CM009249.2 | 4167827   | 4168285   | HERVHF_gag  | - |
| Pan_troglodytes_CM009249.2 | 4169381   | 4170379   | HERVHF_3LTR | - |
| Pan_troglodytes_CM009249.2 | 14344260  | 14344693  | HERVHF_5LTR | + |
| Pan_troglodytes_CM009249.2 | 14345242  | 14347791  | HERVHF_pol  | + |
| Pan_troglodytes_CM009249.2 | 14348106  | 14348468  | HERVHF_env  | + |
| Pan_troglodytes_CM009249.2 | 14348634  | 14349067  | HERVHF_3LTR | + |
| Pan_troglodytes_CM009249.2 | 18393876  | 18394316  | HERVHF_5LTR | + |
| Pan_troglodytes_CM009249.2 | 18396182  | 18397120  | HERVHF_pro  | + |
| Pan_troglodytes_CM009249.2 | 18396368  | 18398858  | HERVHF_pol  | + |
| Pan_troglodytes_CM009249.2 | 18399176  | 18399538  | HERVHF_env  | + |
| Pan_troglodytes_CM009249.2 | 18399692  | 18400132  | HERVHF_3LTR | + |
| Pan_troglodytes_CM009249.2 | 39459006  | 39459438  | HERVHF_5LTR | + |
| Pan_troglodytes_CM009249.2 | 39461073  | 39461675  | HERVHF_gag  | + |
| Pan_troglodytes_CM009249.2 | 39462112  | 39464436  | HERVHF_pol  | + |
| Pan_troglodytes_CM009249.2 | 39464979  | 39465326  | HERVHF_env  | + |
| Pan_troglodytes_CM009249.2 | 39465499  | 39465933  | HERVHF_3LTR | + |
| Pan_troglodytes_CM009250.2 | 17701048  | 17701408  | HERVHF_5LTR | + |
| Pan_troglodytes_CM009250.2 | 17702706  | 17703056  | HERVHF_gag  | + |
| Pan_troglodytes_CM009250.2 | 17703702  | 17704376  | HERVHF_pro  | + |
| Pan_troglodytes_CM009250.2 | 17703720  | 17708320  | HERVHF_pol  | + |
| Pan_troglodytes_CM009250.2 | 17708652  | 17709002  | HERVHF_env  | + |
| Pan_troglodytes_CM009250.2 | 17709235  | 17709588  | HERVHF_3LTR | + |
| Pan_troglodytes_CM009250.2 | 21002720  | 21003172  | HERVHF_5LTR | + |
| Pan_troglodytes_CM009250.2 | 21004890  | 21005276  | HERVHF_gag  | + |
| Pan_troglodytes_CM009250.2 | 21005357  | 21005866  | HERVHF_pro  | + |
| Pan_troglodytes_CM009250.2 | 21005881  | 21007606  | HERVHF_pol  | + |
| Pan_troglodytes_CM009250.2 | 21008061  | 21008512  | HERVHF_3LTR | + |
| Pan_troglodytes_CM009250.2 | 41609740  | 41610250  | HERVK_5LTR  | + |
| Pan_troglodytes_CM009250.2 | 41611007  | 41611885  | HERVK_pro   | + |
| Pan_troglodytes_CM009250.2 | 41611860  | 41613722  | HERVK_pol   | + |
| Pan_troglodytes_CM009250.2 | 41614269  | 41614571  | HERVK_env   | + |
| Pan_troglodytes_CM009250.2 | 41614649  | 41615160  | HERVK_3LTR  | + |
| Pan_troglodytes_CM009250.2 | 51968835  | 51969328  | HERVHF_5LTR | - |
| Pan_troglodytes_CM009250.2 | 51969585  | 51970693  | HERVHF_env  | - |

Pan\_troglodytes\_CM009250.2 51972231 51974711 HERVHF\_pol -  
Pan\_troglodytes\_CM009250.2 51974085 51974804 HERVHF\_pro -  
Pan\_troglodytes\_CM009250.2 51975005 51975322 HERVHF\_gag -  
Pan\_troglodytes\_CM009250.2 51977066 51977559 HERVHF\_3LTR -  
Pan\_troglodytes\_CM009250.2 57499033 57499339 HSERVIII\_5LTR -  
Pan\_troglodytes\_CM009250.2 57502385 57503002 HSERVIII\_pol -  
Pan\_troglodytes\_CM009250.2 57504082 57504383 HSERVIII\_3LTR -  
Pan\_troglodytes\_CM009250.2 70541368 70541796 HERVHF\_5LTR -  
Pan\_troglodytes\_CM009250.2 70542533 70544452 HERVHF\_pol -  
Pan\_troglodytes\_CM009250.2 70544766 70545302 HERVHF\_gag -  
Pan\_troglodytes\_CM009250.2 70546824 70547250 HERVHF\_3LTR -  
Pan\_troglodytes\_CM009250.2 111719729 111720158 HERVHF\_5LTR +  
Pan\_troglodytes\_CM009250.2 111721371 111721925 HERVHF\_gag +  
Pan\_troglodytes\_CM009250.2 111722405 111723157 HERVHF\_pro +  
Pan\_troglodytes\_CM009250.2 111722480 111725792 HERVHF\_pol +  
Pan\_troglodytes\_CM009250.2 111727461 111727799 HERVHF\_env +  
Pan\_troglodytes\_CM009250.2 111727972 111728401 HERVHF\_3LTR +  
Pan\_troglodytes\_CM009250.2 124834031 124834393 HERVHF\_5LTR +  
Pan\_troglodytes\_CM009250.2 124836078 124836527 HERVHF\_gag +  
Pan\_troglodytes\_CM009250.2 124836698 124837351 HERVHF\_pro +  
Pan\_troglodytes\_CM009250.2 124836902 124837807 HERVHF\_pol +  
Pan\_troglodytes\_CM009250.2 124839942 124840307 HERVHF\_3LTR +  
Pan\_troglodytes\_CM009251.2 29856729 29857085 HERVHF\_5LTR -  
Pan\_troglodytes\_CM009251.2 29857632 29860144 HERVHF\_pol -  
Pan\_troglodytes\_CM009251.2 29859665 29860321 HERVHF\_pro -  
Pan\_troglodytes\_CM009251.2 29862272 29862618 HERVHF\_3LTR -  
Pan\_troglodytes\_CM009252.2 1672542 1672952 HERVHF\_5LTR +  
Pan\_troglodytes\_CM009252.2 1674318 1674731 HERVHF\_gag +  
Pan\_troglodytes\_CM009252.2 1674987 1675550 HERVHF\_pro +  
Pan\_troglodytes\_CM009252.2 1675167 1676996 HERVHF\_pol +  
Pan\_troglodytes\_CM009252.2 1677866 1678283 HERVHF\_3LTR +  
Pan\_troglodytes\_CM009252.2 68061096 68061507 HERVHF\_5LTR -  
Pan\_troglodytes\_CM009252.2 68062077 68064164 HERVHF\_pol -  
Pan\_troglodytes\_CM009252.2 68063874 68064590 HERVHF\_pro -  
Pan\_troglodytes\_CM009252.2 68066794 68067194 HERVHF\_3LTR -  
Pan\_troglodytes\_CM009254.2 9151162 9151589 HERVHF\_5LTR -  
Pan\_troglodytes\_CM009254.2 9151820 9153464 HERVHF\_env -  
Pan\_troglodytes\_CM009254.2 9153797 9156252 HERVHF\_pol -  
Pan\_troglodytes\_CM009254.2 9155716 9156513 HERVHF\_pro -  
Pan\_troglodytes\_CM009254.2 9156626 9156949 HERVHF\_gag -  
Pan\_troglodytes\_CM009254.2 9158485 9158915 HERVHF\_3LTR -  
Pan\_troglodytes\_CM009254.2 30583371 30583746 HERVHF\_5LTR +  
Pan\_troglodytes\_CM009254.2 30584336 30585843 HERVHF\_gag +  
Pan\_troglodytes\_CM009254.2 30586043 30586378 HERVHF\_pro +

|                            |          |          |             |   |
|----------------------------|----------|----------|-------------|---|
| Pan_troglodytes_CM009254.2 | 30586172 | 30587980 | HERVHF_pol  | + |
| Pan_troglodytes_CM009254.2 | 30589776 | 30591204 | HERVHF_env  | + |
| Pan_troglodytes_CM009254.2 | 30592252 | 30592623 | HERVHF_3LTR | + |
| Pan_troglodytes_CM009255.2 | 38824354 | 38824761 | HERVHF_5LTR | - |
| Pan_troglodytes_CM009255.2 | 38825383 | 38826694 | HERVHF_pol  | - |
| Pan_troglodytes_CM009255.2 | 38826113 | 38826946 | HERVHF_pro  | - |
| Pan_troglodytes_CM009255.2 | 38829076 | 38829472 | HERVHF_3LTR | - |
| Pan_troglodytes_CM009255.2 | 68359237 | 68359584 | HERVHF_5LTR | + |
| Pan_troglodytes_CM009255.2 | 68361192 | 68361500 | HERVHF_gag  | + |
| Pan_troglodytes_CM009255.2 | 68361628 | 68362338 | HERVHF_pro  | + |
| Pan_troglodytes_CM009255.2 | 68361871 | 68363993 | HERVHF_pol  | + |
| Pan_troglodytes_CM009255.2 | 68364524 | 68364869 | HERVHF_3LTR | + |
| Pan_troglodytes_CM009256.2 | 67547095 | 67547528 | HERVHF_5LTR | + |
| Pan_troglodytes_CM009256.2 | 67550054 | 67551932 | HERVHF_pol  | + |
| Pan_troglodytes_CM009256.2 | 67552526 | 67552959 | HERVHF_3LTR | + |
| Pan_troglodytes_CM009257.2 | 5471150  | 5471621  | HERVHF_5LTR | + |
| Pan_troglodytes_CM009257.2 | 5473153  | 5473452  | HERVHF_gag  | + |
| Pan_troglodytes_CM009257.2 | 5473592  | 5474389  | HERVHF_pro  | + |
| Pan_troglodytes_CM009257.2 | 5473853  | 5474641  | HERVHF_pol  | + |
| Pan_troglodytes_CM009257.2 | 5474855  | 5475193  | HERVHF_env  | + |
| Pan_troglodytes_CM009257.2 | 5475385  | 5475855  | HERVHF_3LTR | + |
| Pan_troglodytes_CM009257.2 | 44057131 | 44057476 | HERVHF_5LTR | - |
| Pan_troglodytes_CM009257.2 | 44058559 | 44067137 | HERVHF_pol  | - |
| Pan_troglodytes_CM009257.2 | 44067068 | 44067568 | HERVHF_pro  | - |
| Pan_troglodytes_CM009257.2 | 44069919 | 44070258 | HERVHF_3LTR | - |
| Pan_troglodytes_CM009258.2 | 15454444 | 15454797 | HERVHF_5LTR | - |
| Pan_troglodytes_CM009258.2 | 15455254 | 15457546 | HERVHF_pol  | - |
| Pan_troglodytes_CM009258.2 | 15457004 | 15457837 | HERVHF_pro  | - |
| Pan_troglodytes_CM009258.2 | 15458007 | 15458417 | HERVHF_gag  | - |
| Pan_troglodytes_CM009258.2 | 15459892 | 15460249 | HERVHF_3LTR | - |
| Pan_troglodytes_CM009258.2 | 39667596 | 39668051 | HERVHF_5LTR | + |
| Pan_troglodytes_CM009258.2 | 39670322 | 39670702 | HERVHF_pro  | + |
| Pan_troglodytes_CM009258.2 | 39670717 | 39672616 | HERVHF_pol  | + |
| Pan_troglodytes_CM009258.2 | 39673052 | 39673504 | HERVHF_3LTR | + |
| Pan_troglodytes_CM009259.2 | 3539036  | 3539366  | HERVHF_5LTR | + |
| Pan_troglodytes_CM009259.2 | 3540960  | 3541283  | HERVHF_gag  | + |
| Pan_troglodytes_CM009259.2 | 3541538  | 3542119  | HERVHF_pro  | + |
| Pan_troglodytes_CM009259.2 | 3541712  | 3544031  | HERVHF_pol  | + |
| Pan_troglodytes_CM009259.2 | 3544456  | 3544777  | HERVHF_3LTR | + |
| Pan_troglodytes_CM009259.2 | 3804981  | 3805396  | HERVHF_5LTR | + |
| Pan_troglodytes_CM009259.2 | 3807106  | 3807426  | HERVHF_gag  | + |
| Pan_troglodytes_CM009259.2 | 3807668  | 3810164  | HERVHF_pol  | + |
| Pan_troglodytes_CM009259.2 | 3807668  | 3808249  | HERVHF_pro  | + |
| Pan_troglodytes_CM009259.2 | 3810614  | 3811031  | HERVHF_3LTR | + |

|                            |           |           |             |   |
|----------------------------|-----------|-----------|-------------|---|
| Pan_troglodytes_CM009260.2 | 17767838  | 17768258  | HERVHF_5LTR | + |
| Pan_troglodytes_CM009260.2 | 17769604  | 17770017  | HERVHF_gag  | + |
| Pan_troglodytes_CM009260.2 | 17770070  | 17770846  | HERVHF_pro  | + |
| Pan_troglodytes_CM009260.2 | 17770534  | 17772332  | HERVHF_pol  | + |
| Pan_troglodytes_CM009260.2 | 17772827  | 17773248  | HERVHF_3LTR | + |
| Pan_troglodytes_CM009261.2 | 28448170  | 28448496  | HERVHF_5LTR | - |
| Pan_troglodytes_CM009261.2 | 28448659  | 28449009  | HERVHF_env  | - |
| Pan_troglodytes_CM009261.2 | 28449904  | 28450953  | HERVHF_pol  | - |
| Pan_troglodytes_CM009261.2 | 28451155  | 28452244  | HERVHF_gag  | - |
| Pan_troglodytes_CM009261.2 | 28453039  | 28453382  | HERVHF_3LTR | - |
| Pan_troglodytes_CM009261.2 | 65097825  | 65098166  | HERVHF_5LTR | - |
| Pan_troglodytes_CM009261.2 | 65098293  | 65098715  | HERVHF_env  | - |
| Pan_troglodytes_CM009261.2 | 65099348  | 65101742  | HERVHF_pol  | - |
| Pan_troglodytes_CM009261.2 | 65101098  | 65101949  | HERVHF_pro  | - |
| Pan_troglodytes_CM009261.2 | 65102189  | 65102725  | HERVHF_gag  | - |
| Pan_troglodytes_CM009261.2 | 65104172  | 65104518  | HERVHF_3LTR | - |
| Pan_troglodytes_CM009261.2 | 82404929  | 82405372  | HERVHF_5LTR | + |
| Pan_troglodytes_CM009261.2 | 82407081  | 82407380  | HERVHF_gag  | + |
| Pan_troglodytes_CM009261.2 | 82407437  | 82408237  | HERVHF_pro  | + |
| Pan_troglodytes_CM009261.2 | 82407620  | 82409591  | HERVHF_pol  | + |
| Pan_troglodytes_CM009261.2 | 82410172  | 82410611  | HERVHF_3LTR | + |
| Pan_troglodytes_CM009261.2 | 87540440  | 87540897  | HERVHF_5LTR | - |
| Pan_troglodytes_CM009261.2 | 87541719  | 87543411  | HERVHF_pol  | - |
| Pan_troglodytes_CM009261.2 | 87542887  | 87543507  | HERVHF_pro  | - |
| Pan_troglodytes_CM009261.2 | 87545640  | 87546094  | HERVHF_3LTR | - |
| Pan_troglodytes_CM009261.2 | 116546206 | 116546515 | HERVHF_5LTR | - |
| Pan_troglodytes_CM009261.2 | 116546795 | 116547166 | HERVHF_env  | - |
| Pan_troglodytes_CM009261.2 | 116547211 | 116548372 | HERVHF_pol  | - |
| Pan_troglodytes_CM009261.2 | 116547994 | 116548581 | HERVHF_pro  | - |
| Pan_troglodytes_CM009261.2 | 116548661 | 116549137 | HERVHF_gag  | - |
| Pan_troglodytes_CM009261.2 | 116550583 | 116550887 | HERVHF_3LTR | - |
| Pan_troglodytes_CM009261.2 | 140421820 | 140422128 | HERVHF_5LTR | - |
| Pan_troglodytes_CM009261.2 | 140424526 | 140426900 | HERVHF_pol  | - |
| Pan_troglodytes_CM009261.2 | 140427185 | 140427670 | HERVHF_gag  | - |
| Pan_troglodytes_CM009261.2 | 140429177 | 140429491 | HERVHF_3LTR | - |
| Pan_troglodytes_KZ622834.1 | 5394343   | 5394716   | HERVHF_5LTR | + |
| Pan_troglodytes_KZ622834.1 | 5401874   | 5403349   | HERVHF_gag  | + |
| Pan_troglodytes_KZ622834.1 | 5404015   | 5406611   | HERVHF_pol  | + |
| Pan_troglodytes_KZ622834.1 | 5408170   | 5408813   | HERVHF_env  | + |
| Pan_troglodytes_KZ622834.1 | 5409232   | 5409589   | HERVHF_3LTR | + |
| Pan_troglodytes_KZ622835.1 | 669576    | 669900    | HERVHF_5LTR | + |
| Pan_troglodytes_KZ622835.1 | 671281    | 671861    | HERVHF_gag  | + |
| Pan_troglodytes_KZ622835.1 | 671918    | 672706    | HERVHF_pro  | + |
| Pan_troglodytes_KZ622835.1 | 672471    | 674425    | HERVHF_pol  | + |

|                                |           |           |                |   |
|--------------------------------|-----------|-----------|----------------|---|
| Pan_troglodytes_KZ622835.1     | 676066    | 677192    | HERVHF_env     | + |
| Pan_troglodytes_KZ622835.1     | 677417    | 677732    | HERVHF_3LTR    | + |
| Pan_troglodytes_NBAG03000060.1 | 38461     | 38765     | HERVHF_5LTR    | + |
| Pan_troglodytes_NBAG03000060.1 | 45678     | 45995     | HERVHF_gag     | + |
| Pan_troglodytes_NBAG03000060.1 | 46104     | 46781     | HERVHF_pro     | + |
| Pan_troglodytes_NBAG03000060.1 | 46287     | 48111     | HERVHF_pol     | + |
| Pan_troglodytes_NBAG03000060.1 | 49367     | 49681     | HERVHF_3LTR    | + |
| Pan_troglodytes_NBAG03000384.1 | 1709669   | 1710134   | HERVK_5LTR     | - |
| Pan_troglodytes_NBAG03000384.1 | 1710703   | 1712743   | HERVK_pol      | - |
| Pan_troglodytes_NBAG03000384.1 | 1712201   | 1713451   | HERVK_pro      | - |
| Pan_troglodytes_NBAG03000384.1 | 1714901   | 1715371   | HERVK_3LTR     | - |
| Pan_troglodytes_NBAG03001518.1 | 45869     | 46211     | HERVHF_5LTR    | + |
| Pan_troglodytes_NBAG03001518.1 | 47825     | 48154     | HERVHF_gag     | + |
| Pan_troglodytes_NBAG03001518.1 | 48204     | 49205     | HERVHF_pro     | + |
| Pan_troglodytes_NBAG03001518.1 | 48750     | 51093     | HERVHF_pol     | + |
| Pan_troglodytes_NBAG03001518.1 | 52771     | 53546     | HERVHF_env     | + |
| Pan_troglodytes_NBAG03001518.1 | 54094     | 54430     | HERVHF_3LTR    | + |
| Pan_troglodytes_NBAG03002951.1 | 15507     | 15908     | HERVHF_5LTR    | + |
| Pan_troglodytes_NBAG03002951.1 | 17365     | 17847     | HERVHF_gag     | + |
| Pan_troglodytes_NBAG03002951.1 | 17954     | 18277     | HERVHF_pro     | + |
| Pan_troglodytes_NBAG03002951.1 | 18294     | 20205     | HERVHF_pol     | + |
| Pan_troglodytes_NBAG03002951.1 | 20650     | 21053     | HERVHF_3LTR    | + |
| Pan_troglodytes_NBAG03002955.1 | 15483     | 15884     | HERVHF_5LTR    | + |
| Pan_troglodytes_NBAG03002955.1 | 17341     | 17823     | HERVHF_gag     | + |
| Pan_troglodytes_NBAG03002955.1 | 17930     | 18253     | HERVHF_pro     | + |
| Pan_troglodytes_NBAG03002955.1 | 18270     | 20181     | HERVHF_pol     | + |
| Pan_troglodytes_NBAG03002955.1 | 20626     | 21029     | HERVHF_3LTR    | + |
| Papio_anubis_CM001491.2        | 11599737  | 11600051  | HERVIPADP_5LTR | - |
| Papio_anubis_CM001491.2        | 11600075  | 11600730  | HERVIPADP_env  | - |
| Papio_anubis_CM001491.2        | 11602962  | 11605782  | HERVIPADP_pol  | - |
| Papio_anubis_CM001491.2        | 11606342  | 11606659  | HERVIPADP_gag  | - |
| Papio_anubis_CM001491.2        | 11614561  | 11614880  | HERVIPADP_3LTR | - |
| Papio_anubis_CM001491.2        | 75806746  | 75807112  | HERVK_5LTR     | - |
| Papio_anubis_CM001491.2        | 75808252  | 75809910  | HERVK_pol      | - |
| Papio_anubis_CM001491.2        | 75810016  | 75810743  | HERVK_pro      | - |
| Papio_anubis_CM001491.2        | 75811242  | 75811682  | HERVK_gag      | - |
| Papio_anubis_CM001491.2        | 75812151  | 75812501  | HERVK_3LTR     | - |
| Papio_anubis_CM001492.2        | 10733785  | 10734160  | HERVK_5LTR     | - |
| Papio_anubis_CM001492.2        | 10734819  | 10736011  | HERVK_env      | - |
| Papio_anubis_CM001492.2        | 10737347  | 10738505  | HERVK_pol      | - |
| Papio_anubis_CM001492.2        | 10738346  | 10738852  | HERVK_pro      | - |
| Papio_anubis_CM001492.2        | 10740496  | 10740856  | HERVK_3LTR     | - |
| Papio_anubis_CM001493.2        | 123829370 | 123829857 | HERVK_5LTR     | - |
| Papio_anubis_CM001493.2        | 123829965 | 123830273 | HERVK_env      | - |

|                         |           |           |                |   |
|-------------------------|-----------|-----------|----------------|---|
| Papio_anubis_CM001493.2 | 123830810 | 123832720 | HERVK_pol      | - |
| Papio_anubis_CM001493.2 | 123832621 | 123833430 | HERVK_pro      | - |
| Papio_anubis_CM001493.2 | 123834312 | 123834789 | HERVK_3LTR     | - |
| Papio_anubis_CM001493.2 | 132810664 | 132811108 | HERVK_5LTR     | + |
| Papio_anubis_CM001493.2 | 132812809 | 132813672 | HERVK_gag      | + |
| Papio_anubis_CM001493.2 | 132813832 | 132814699 | HERVK_pro      | + |
| Papio_anubis_CM001493.2 | 132814585 | 132815712 | HERVK_pol      | + |
| Papio_anubis_CM001493.2 | 132816366 | 132816677 | HERVK_env      | + |
| Papio_anubis_CM001493.2 | 132816832 | 132817271 | HERVK_3LTR     | + |
| Papio_anubis_CM001494.2 | 110884803 | 110885121 | HSERVIII_5LTR  | + |
| Papio_anubis_CM001494.2 | 110886994 | 110889874 | HSERVIII_pol   | + |
| Papio_anubis_CM001494.2 | 110891302 | 110891623 | HSERVIII_3LTR  | + |
| Papio_anubis_CM001495.2 | 127306340 | 127306682 | HERVK_5LTR     | - |
| Papio_anubis_CM001495.2 | 127307612 | 127309406 | HERVK_pol      | - |
| Papio_anubis_CM001495.2 | 127309474 | 127310321 | HERVK_pro      | - |
| Papio_anubis_CM001495.2 | 127310756 | 127311244 | HERVK_gag      | - |
| Papio_anubis_CM001495.2 | 127311894 | 127312225 | HERVK_3LTR     | - |
| Papio_anubis_CM001498.2 | 38252091  | 38252400  | HERVIPADP_5LTR | - |
| Papio_anubis_CM001498.2 | 38256053  | 38257678  | HERVIPADP_pol  | - |
| Papio_anubis_CM001498.2 | 38258347  | 38258652  | HERVIPADP_gag  | - |
| Papio_anubis_CM001498.2 | 38260544  | 38260856  | HERVIPADP_3LTR | - |
| Papio_anubis_CM001501.2 | 52308345  | 52308650  | HSERVIII_5LTR  | + |
| Papio_anubis_CM001501.2 | 52315530  | 52318428  | HSERVIII_pol   | + |
| Papio_anubis_CM001501.2 | 52322846  | 52323156  | HSERVIII_3LTR  | + |
| Papio_anubis_CM001502.2 | 52818856  | 52819322  | HERVK_5LTR     | - |
| Papio_anubis_CM001502.2 | 52819430  | 52819737  | HERVK_env      | - |
| Papio_anubis_CM001502.2 | 52820442  | 52822187  | HERVK_pol      | - |
| Papio_anubis_CM001502.2 | 52822082  | 52822861  | HERVK_pro      | - |
| Papio_anubis_CM001502.2 | 52823923  | 52824393  | HERVK_3LTR     | - |
| Papio_anubis_CM001502.2 | 117391642 | 117391994 | HERVHF_5LTR    | + |
| Papio_anubis_CM001502.2 | 117393870 | 117394169 | HERVHF_gag     | + |
| Papio_anubis_CM001502.2 | 117394159 | 117395001 | HERVHF_pro     | + |
| Papio_anubis_CM001502.2 | 117394357 | 117397467 | HERVHF_pol     | + |
| Papio_anubis_CM001502.2 | 117398556 | 117398914 | HERVHF_3LTR    | + |
| Papio_anubis_CM001504.2 | 64105283  | 64105595  | HERVK_5LTR     | - |
| Papio_anubis_CM001504.2 | 64105856  | 64107292  | HERVK_env      | - |
| Papio_anubis_CM001504.2 | 64110395  | 64111132  | HERVK_pol      | - |
| Papio_anubis_CM001504.2 | 64111132  | 64111887  | HERVK_pro      | - |
| Papio_anubis_CM001504.2 | 64116506  | 64116823  | HERVK_3LTR     | - |
| Papio_anubis_CM001505.2 | 77153764  | 77154255  | HERVIPADP_5LTR | - |
| Papio_anubis_CM001505.2 | 77156433  | 77159542  | HERVIPADP_pol  | - |
| Papio_anubis_CM001505.2 | 77159938  | 77160297  | HERVIPADP_gag  | - |
| Papio_anubis_CM001505.2 | 77162075  | 77162568  | HERVIPADP_3LTR | - |
| Papio_anubis_CM001506.2 | 23934342  | 23934664  | HERVK_5LTR     | - |



|                          |           |           |                |   |
|--------------------------|-----------|-----------|----------------|---|
| Papio_anubis_CM001506.2  | 23935518  | 23936820  | HERVK_pol      | - |
| Papio_anubis_CM001506.2  | 23936688  | 23937455  | HERVK_pro      | - |
| Papio_anubis_CM001506.2  | 23938697  | 23939018  | HERVK_3LTR     | - |
| Papio_anubis_CM001507.2  | 88416681  | 88416995  | HERVIPADP_5LTR | + |
| Papio_anubis_CM001507.2  | 88422755  | 88425194  | HERVIPADP_pol  | + |
| Papio_anubis_CM001507.2  | 88427255  | 88427561  | HERVIPADP_3LTR | + |
| Papio_anubis_KZ097202.1  | 35183922  |           | HERVIPADP_5LTR | - |
| Papio_anubis_KZ097202.1  | 42704674  |           | HERVIPADP_env  | - |
| Papio_anubis_KZ097202.1  | 659210063 |           | HERVIPADP_pol  | - |
| Papio_anubis_KZ097202.1  | 10588     | 10929     | HERVIPADP_gag  | - |
| Papio_anubis_KZ097202.1  | 12688     | 13098     | HERVIPADP_3LTR | - |
| Papio_anubis_KZ098017.1  | 48506     | 49020     | HERVK_5LTR     | - |
| Papio_anubis_KZ098017.1  | 49096     | 49428     | HERVK_env      | - |
| Papio_anubis_KZ098017.1  | 49947     | 51833     | HERVK_pol      | - |
| Papio_anubis_KZ098017.1  | 51795     | 52604     | HERVK_pro      | - |
| Papio_anubis_KZ098017.1  | 52699     | 54037     | HERVK_gag      | - |
| Papio_anubis_KZ098017.1  | 55050     | 55545     | HERVK_3LTR     | - |
| Papio_hamadryas_Contig1  | 56473625  | 56474091  | HERVK_5LTR     | - |
| Papio_hamadryas_Contig1  | 56474199  | 56474506  | HERVK_env      | - |
| Papio_hamadryas_Contig1  | 56475211  | 56476956  | HERVK_pol      | - |
| Papio_hamadryas_Contig1  | 56476851  | 56477630  | HERVK_pro      | - |
| Papio_hamadryas_Contig1  | 56478692  | 56479162  | HERVK_3LTR     | - |
| Papio_hamadryas_Contig1  | 99329013  | 99329464  | HERVHF_5LTR    | - |
| Papio_hamadryas_Contig1  | 99329694  | 99330959  | HERVHF_pol     | - |
| Papio_hamadryas_Contig1  | 99333104  | 99333558  | HERVHF_3LTR    | - |
| Papio_hamadryas_Contig1  | 113198831 | 113199192 | HERVHF_5LTR    | - |
| Papio_hamadryas_Contig1  | 113199501 | 113200558 | HERVHF_env     | - |
| Papio_hamadryas_Contig1  | 113201618 | 113203476 | HERVHF_pol     | - |
| Papio_hamadryas_Contig1  | 113205995 | 113206346 | HERVHF_3LTR    | - |
| Papio_hamadryas_Contig10 | 11644360  | 11644669  | HERVHF_5LTR    | + |
| Papio_hamadryas_Contig10 | 11646314  | 11646637  | HERVHF_gag     | + |
| Papio_hamadryas_Contig10 | 11646627  | 11646962  | HERVHF_pro     | + |
| Papio_hamadryas_Contig10 | 11646967  | 11649386  | HERVHF_pol     | + |
| Papio_hamadryas_Contig10 | 11649410  | 11649710  | HERVHF_3LTR    | + |
| Papio_hamadryas_Contig10 | 17080119  | 17080633  | HERVK_5LTR     | - |
| Papio_hamadryas_Contig10 | 17080733  | 17081047  | HERVK_env      | - |
| Papio_hamadryas_Contig10 | 17081572  | 17083313  | HERVK_pol      | - |
| Papio_hamadryas_Contig10 | 17083214  | 17084155  | HERVK_pro      | - |
| Papio_hamadryas_Contig10 | 17085570  | 17086084  | HERVK_3LTR     | - |
| Papio_hamadryas_Contig10 | 52221913  | 52222366  | HERVHF_5LTR    | - |
| Papio_hamadryas_Contig10 | 52222891  | 52224843  | HERVHF_pol     | - |
| Papio_hamadryas_Contig10 | 52225153  | 52225494  | HERVHF_gag     | - |
| Papio_hamadryas_Contig10 | 52227105  | 52227562  | HERVHF_3LTR    | - |
| Papio_hamadryas_Contig11 | 36892214  | 36892669  | HERVHF_5LTR    | - |

|                           |          |          |             |   |
|---------------------------|----------|----------|-------------|---|
| Papio_hamadryas_Contig11  | 36893396 | 36895050 | HERVHF_pol  | - |
| Papio_hamadryas_Contig11  | 36894665 | 36895462 | HERVHF_pro  | - |
| Papio_hamadryas_Contig11  | 36897576 | 36898033 | HERVHF_3LTR | - |
| Papio_hamadryas_Contig115 | 814422   | 814760   | HERVK_5LTR  | + |
| Papio_hamadryas_Contig115 | 822399   | 823465   | HERVK_pro   | + |
| Papio_hamadryas_Contig115 | 823419   | 825143   | HERVK_pol   | + |
| Papio_hamadryas_Contig115 | 829096   | 829428   | HERVK_3LTR  | + |
| Papio_hamadryas_Contig119 | 459284   | 459909   | HERVHF_5LTR | - |
| Papio_hamadryas_Contig119 | 460076   | 460605   | HERVHF_env  | - |
| Papio_hamadryas_Contig119 | 463068   | 465026   | HERVHF_pol  | - |
| Papio_hamadryas_Contig119 | 465704   | 466316   | HERVHF_3LTR | - |
| Papio_hamadryas_Contig125 | 3565270  | 3565650  | HERVHF_5LTR | + |
| Papio_hamadryas_Contig125 | 3567145  | 3567672  | HERVHF_gag  | + |
| Papio_hamadryas_Contig125 | 3567975  | 3571590  | HERVHF_pol  | + |
| Papio_hamadryas_Contig125 | 3572282  | 3572644  | HERVHF_3LTR | + |
| Papio_hamadryas_Contig13  | 40156861 | 40157226 | HERVHF_5LTR | + |
| Papio_hamadryas_Contig13  | 40159495 | 40160148 | HERVHF_pro  | + |
| Papio_hamadryas_Contig13  | 40159525 | 40161468 | HERVHF_pol  | + |
| Papio_hamadryas_Contig13  | 40162079 | 40162440 | HERVHF_3LTR | + |
| Papio_hamadryas_Contig13  | 47820668 | 47820970 | HERVHF_5LTR | + |
| Papio_hamadryas_Contig13  | 47823528 | 47825093 | HERVHF_pol  | + |
| Papio_hamadryas_Contig13  | 47825932 | 47826231 | HERVHF_3LTR | + |
| Papio_hamadryas_Contig131 | 1623864  | 1624166  | HERVHF_5LTR | - |
| Papio_hamadryas_Contig131 | 1625340  | 1625675  | HERVHF_env  | - |
| Papio_hamadryas_Contig131 | 1625595  | 1628249  | HERVHF_pol  | - |
| Papio_hamadryas_Contig131 | 1629398  | 1634949  | HERVHF_gag  | - |
| Papio_hamadryas_Contig131 | 1636516  | 1636815  | HERVHF_3LTR | - |
| Papio_hamadryas_Contig16  | 14072570 | 14072870 | HUERSP_5LTR | - |
| Papio_hamadryas_Contig16  | 14077256 | 14078779 | HUERSP_env  | - |
| Papio_hamadryas_Contig16  | 14082411 | 14083460 | HUERSP_pol  | - |
| Papio_hamadryas_Contig16  | 14083830 | 14084159 | HUERSP_gag  | - |
| Papio_hamadryas_Contig16  | 14085357 | 14085671 | HUERSP_3LTR | - |
| Papio_hamadryas_Contig16  | 18400404 | 18400868 | HERVHF_5LTR | - |
| Papio_hamadryas_Contig16  | 18401033 | 18401410 | HERVHF_env  | - |
| Papio_hamadryas_Contig16  | 18401750 | 18403354 | HERVHF_pol  | - |
| Papio_hamadryas_Contig16  | 18403234 | 18403680 | HERVHF_pro  | - |
| Papio_hamadryas_Contig16  | 18404148 | 18404534 | HERVHF_gag  | - |
| Papio_hamadryas_Contig16  | 18405799 | 18406267 | HERVHF_3LTR | - |
| Papio_hamadryas_Contig17  | 18882275 | 18882695 | HERVHF_5LTR | + |
| Papio_hamadryas_Contig17  | 18884176 | 18884493 | HERVHF_gag  | + |
| Papio_hamadryas_Contig17  | 18884717 | 18885349 | HERVHF_pro  | + |
| Papio_hamadryas_Contig17  | 18884948 | 18886437 | HERVHF_pol  | + |
| Papio_hamadryas_Contig17  | 18887307 | 18887731 | HERVHF_3LTR | + |
| Papio_hamadryas_Contig20  | 16178332 | 16178783 | HERVHF_5LTR | - |

|                          |          |          |             |   |
|--------------------------|----------|----------|-------------|---|
| Papio_hamadryas_Contig20 | 16179207 | 16181113 | HERVHF_pol  | - |
| Papio_hamadryas_Contig20 | 16181082 | 16181573 | HERVHF_pro  | - |
| Papio_hamadryas_Contig20 | 16183593 | 16184046 | HERVHF_3LTR | - |
| Papio_hamadryas_Contig20 | 23349222 | 23349579 | HERVHF_5LTR | + |
| Papio_hamadryas_Contig20 | 23350903 | 23351412 | HERVHF_gag  | + |
| Papio_hamadryas_Contig20 | 23351799 | 23352626 | HERVHF_pro  | + |
| Papio_hamadryas_Contig20 | 23351973 | 23354931 | HERVHF_pol  | + |
| Papio_hamadryas_Contig20 | 23356133 | 23357450 | HERVHF_env  | + |
| Papio_hamadryas_Contig20 | 23357529 | 23357892 | HERVHF_3LTR | + |
| Papio_hamadryas_Contig3  | 25486506 | 25486842 | HERVHF_5LTR | + |
| Papio_hamadryas_Contig3  | 25488519 | 25489154 | HERVHF_gag  | + |
| Papio_hamadryas_Contig3  | 25490861 | 25491589 | HERVHF_pro  | + |
| Papio_hamadryas_Contig3  | 25490972 | 25494010 | HERVHF_pol  | + |
| Papio_hamadryas_Contig3  | 25495411 | 25495950 | HERVHF_env  | + |
| Papio_hamadryas_Contig3  | 25496468 | 25496812 | HERVHF_3LTR | + |
| Papio_hamadryas_Contig3  | 46288106 | 46288542 | HERVHF_5LTR | + |
| Papio_hamadryas_Contig3  | 46289993 | 46290598 | HERVHF_gag  | + |
| Papio_hamadryas_Contig3  | 46291079 | 46294370 | HERVHF_pol  | + |
| Papio_hamadryas_Contig3  | 46294900 | 46295347 | HERVHF_3LTR | + |
| Papio_hamadryas_Contig30 | 8985262  | 8985589  | HERVHF_5LTR | - |
| Papio_hamadryas_Contig30 | 8986033  | 8987962  | HERVHF_pol  | - |
| Papio_hamadryas_Contig30 | 8988365  | 8988679  | HERVHF_gag  | - |
| Papio_hamadryas_Contig30 | 8991065  | 8991391  | HERVHF_3LTR | - |
| Papio_hamadryas_Contig32 | 16412755 | 16413212 | HERVHF_5LTR | - |
| Papio_hamadryas_Contig32 | 16414368 | 16416081 | HERVHF_pol  | - |
| Papio_hamadryas_Contig32 | 16415518 | 16416318 | HERVHF_pro  | - |
| Papio_hamadryas_Contig32 | 16418336 | 16418800 | HERVHF_3LTR | - |
| Papio_hamadryas_Contig36 | 16340289 | 16340679 | HERVHF_5LTR | - |
| Papio_hamadryas_Contig36 | 16340847 | 16341425 | HERVHF_env  | - |
| Papio_hamadryas_Contig36 | 16343092 | 16344741 | HERVHF_pol  | - |
| Papio_hamadryas_Contig36 | 16344506 | 16345261 | HERVHF_pro  | - |
| Papio_hamadryas_Contig36 | 16345353 | 16345703 | HERVHF_gag  | - |
| Papio_hamadryas_Contig36 | 16347027 | 16347425 | HERVHF_3LTR | - |
| Papio_hamadryas_Contig39 | 17058061 | 17058428 | HERVHF_5LTR | - |
| Papio_hamadryas_Contig39 | 17058702 | 17061290 | HERVHF_pol  | - |
| Papio_hamadryas_Contig39 | 17060691 | 17061485 | HERVHF_pro  | - |
| Papio_hamadryas_Contig39 | 17061541 | 17061873 | HERVHF_gag  | - |
| Papio_hamadryas_Contig39 | 17063334 | 17063701 | HERVHF_3LTR | - |
| Papio_hamadryas_Contig44 | 2942610  | 2943045  | HERVHF_5LTR | + |
| Papio_hamadryas_Contig44 | 2944712  | 2945035  | HERVHF_gag  | + |
| Papio_hamadryas_Contig44 | 2945252  | 2945863  | HERVHF_pro  | + |
| Papio_hamadryas_Contig44 | 2945324  | 2947010  | HERVHF_pol  | + |
| Papio_hamadryas_Contig44 | 2947834  | 2948271  | HERVHF_3LTR | + |
| Papio_hamadryas_Contig45 | 14504224 | 14504581 | HERVHF_5LTR | + |

|                          |          |          |               |   |
|--------------------------|----------|----------|---------------|---|
| Papio_hamadryas_Contig45 | 14506047 | 14506361 | HERVHF_gag    | + |
| Papio_hamadryas_Contig45 | 14506444 | 14506947 | HERVHF_pro    | + |
| Papio_hamadryas_Contig45 | 14506590 | 14509615 | HERVHF_pol    | + |
| Papio_hamadryas_Contig45 | 14510511 | 14511113 | HERVHF_env    | + |
| Papio_hamadryas_Contig45 | 14511279 | 14511643 | HERVHF_3LTR   | + |
| Papio_hamadryas_Contig5  | 27610986 | 27611417 | HERVHF_5LTR   | - |
| Papio_hamadryas_Contig5  | 27611760 | 27614524 | HERVHF_pol    | - |
| Papio_hamadryas_Contig5  | 27613889 | 27614671 | HERVHF_pro    | - |
| Papio_hamadryas_Contig5  | 27614718 | 27615157 | HERVHF_gag    | - |
| Papio_hamadryas_Contig5  | 27616865 | 27617297 | HERVHF_3LTR   | - |
| Papio_hamadryas_Contig5  | 36113634 | 36114015 | HERVHF_5LTR   | + |
| Papio_hamadryas_Contig5  | 36115734 | 36116054 | HERVHF_gag    | + |
| Papio_hamadryas_Contig5  | 36116253 | 36116885 | HERVHF_pro    | + |
| Papio_hamadryas_Contig5  | 36116304 | 36117773 | HERVHF_pol    | + |
| Papio_hamadryas_Contig5  | 36117986 | 36118609 | HERVHF_env    | + |
| Papio_hamadryas_Contig5  | 36118902 | 36119292 | HERVHF_3LTR   | + |
| Papio_hamadryas_Contig50 | 15503311 | 15503742 | HERVHF_5LTR   | + |
| Papio_hamadryas_Contig50 | 15505200 | 15505631 | HERVHF_gag    | + |
| Papio_hamadryas_Contig50 | 15506017 | 15507567 | HERVHF_pol    | + |
| Papio_hamadryas_Contig50 | 15508991 | 15509422 | HERVHF_3LTR   | + |
| Papio_hamadryas_Contig51 | 16108191 | 16108608 | HERVHF_5LTR   | + |
| Papio_hamadryas_Contig51 | 16110658 | 16111431 | HERVHF_pro    | + |
| Papio_hamadryas_Contig51 | 16110850 | 16113386 | HERVHF_pol    | + |
| Papio_hamadryas_Contig51 | 16113927 | 16114356 | HERVHF_3LTR   | + |
| Papio_hamadryas_Contig6  | 49462200 | 49462630 | HERVHF_5LTR   | + |
| Papio_hamadryas_Contig6  | 49464076 | 49464405 | HERVHF_gag    | + |
| Papio_hamadryas_Contig6  | 49465326 | 49467656 | HERVHF_pol    | + |
| Papio_hamadryas_Contig6  | 49468194 | 49468634 | HERVHF_3LTR   | + |
| Papio_hamadryas_Contig71 | 8401262  | 8401633  | HERVHF_5LTR   | - |
| Papio_hamadryas_Contig71 | 8402192  | 8404323  | HERVHF_pol    | - |
| Papio_hamadryas_Contig71 | 8403751  | 8404527  | HERVHF_pro    | - |
| Papio_hamadryas_Contig71 | 8404574  | 8404894  | HERVHF_gag    | - |
| Papio_hamadryas_Contig71 | 8406495  | 8406856  | HERVHF_3LTR   | - |
| Papio_hamadryas_Contig8  | 58882520 | 58882838 | HSERVIII_5LTR | + |
| Papio_hamadryas_Contig8  | 58884711 | 58887591 | HSERVIII_pol  | + |
| Papio_hamadryas_Contig8  | 58889019 | 58889340 | HSERVIII_3LTR | + |
| Papio_hamadryas_Contig81 | 1783953  | 1784952  | HERVHF_5LTR   | + |
| Papio_hamadryas_Contig81 | 1787164  | 1795487  | HERVHF_pol    | + |
| Papio_hamadryas_Contig81 | 1797211  | 1798203  | HERVHF_3LTR   | + |
| Papio_hamadryas_Contig9  | 22826528 | 22826924 | HERVHF_5LTR   | + |
| Papio_hamadryas_Contig9  | 22828757 | 22829506 | HERVHF_pro    | + |
| Papio_hamadryas_Contig9  | 22829219 | 22831338 | HERVHF_pol    | + |
| Papio_hamadryas_Contig9  | 22831757 | 22832154 | HERVHF_3LTR   | + |
| Papio_hamadryas_Contig93 | 3391924  | 3392282  | HERVHF_5LTR   | + |

Papio\_hamadryas\_Contig93 3393784 3394293 HERVHF\_gag +  
 Papio\_hamadryas\_Contig93 3395068 3396989 HERVHF\_pol +  
 Papio\_hamadryas\_Contig93 3397405 3397757 HERVHF\_3LTR +  
 Piliocolobus\_tephrosceles\_PDMG02000017.1 1675943 1676340 HERVHF\_5LTR +  
  
 Piliocolobus\_tephrosceles\_PDMG02000017.1 1678196 1679343 HERVHF\_pro +  
 Piliocolobus\_tephrosceles\_PDMG02000017.1 1678423 1680972 HERVHF\_pol +  
 Piliocolobus\_tephrosceles\_PDMG02000017.1 1681824 1682226 HERVHF\_3LTR +  
  
 Piliocolobus\_tephrosceles\_PDMG02000017.1 27368488 27368801 HERVHF\_5LTR +  
  
 Piliocolobus\_tephrosceles\_PDMG02000017.1 27370270 27370713 HERVHF\_gag +  
 Piliocolobus\_tephrosceles\_PDMG02000017.1 27371133 27371807 HERVHF\_pro +  
 Piliocolobus\_tephrosceles\_PDMG02000017.1 27371283 27373290 HERVHF\_pol +  
 Piliocolobus\_tephrosceles\_PDMG02000017.1 27374042 27374357 HERVHF\_3LTR +  
  
 Piliocolobus\_tephrosceles\_PDMG02000027.1 4925586 4926027 HERVHF\_5LTR +  
  
 Piliocolobus\_tephrosceles\_PDMG02000027.1 4928008 4928832 HERVHF\_pro +  
 Piliocolobus\_tephrosceles\_PDMG02000027.1 4928332 4929003 HERVHF\_pol +  
 Piliocolobus\_tephrosceles\_PDMG02000027.1 4929898 4930275 HERVHF\_env +  
 Piliocolobus\_tephrosceles\_PDMG02000027.1 4930770 4931212 HERVHF\_3LTR +  
  
 Piliocolobus\_tephrosceles\_PDMG02000045.1 13103273 13103672 HERVHF\_5LTR +  
  
 Piliocolobus\_tephrosceles\_PDMG02000045.1 13106307 13108345 HERVHF\_pol +  
 Piliocolobus\_tephrosceles\_PDMG02000045.1 13108830 13109238 HERVHF\_3LTR +  
  
 Piliocolobus\_tephrosceles\_PDMG02000045.1 26058991 26059494 HERVK\_5LTR +  
 Piliocolobus\_tephrosceles\_PDMG02000045.1 26060998 26061780 HERVK\_pro +  
 Piliocolobus\_tephrosceles\_PDMG02000045.1 26061703 26063360 HERVK\_pol +  
 Piliocolobus\_tephrosceles\_PDMG02000045.1 26064045 26064385 HERVK\_env +  
 Piliocolobus\_tephrosceles\_PDMG02000045.1 26064466 26064966 HERVK\_3LTR +  
 Piliocolobus\_tephrosceles\_PDMG02000046.1 9519389 9519801 HERVHF\_5LTR +  
  
 Piliocolobus\_tephrosceles\_PDMG02000046.1 9521177 9521641 HERVHF\_gag +  
 Piliocolobus\_tephrosceles\_PDMG02000046.1 9522449 9523150 HERVHF\_pro +  
 Piliocolobus\_tephrosceles\_PDMG02000046.1 9522515 9525025 HERVHF\_pol +  
 Piliocolobus\_tephrosceles\_PDMG02000046.1 9525656 9526069 HERVHF\_3LTR +  
  
 Piliocolobus\_tephrosceles\_PDMG02000046.1 34488419 34488822 HERVHF\_5LTR +  
  
 Piliocolobus\_tephrosceles\_PDMG02000046.1 34490136 34490600 HERVHF\_gag +  
 Piliocolobus\_tephrosceles\_PDMG02000046.1 34490520 34490876 HERVHF\_pro +

|                                          |          |          |             |   |
|------------------------------------------|----------|----------|-------------|---|
| Piliocolobus_tephrosceles_PDMG02000046.1 | 34491050 | 34492999 | HERVHF_pol  | + |
| Piliocolobus_tephrosceles_PDMG02000046.1 | 34494006 | 34494410 | HERVHF_3LTR | + |
| Piliocolobus_tephrosceles_PDMG02000070.1 | 36695123 | 36695541 | HERVHF_5LTR | + |
| Piliocolobus_tephrosceles_PDMG02000070.1 | 36697650 | 36698741 | HERVHF_pro  | + |
| Piliocolobus_tephrosceles_PDMG02000070.1 | 36698115 | 36700225 | HERVHF_pol  | + |
| Piliocolobus_tephrosceles_PDMG02000070.1 | 36700696 | 36701106 | HERVHF_3LTR | + |
| Piliocolobus_tephrosceles_PDMG02000082.1 | 3316242  | 3316684  | HERVHF_5LTR | + |
| Piliocolobus_tephrosceles_PDMG02000082.1 | 3318191  | 3318490  | HERVHF_gag  | + |
| Piliocolobus_tephrosceles_PDMG02000082.1 | 3319148  | 3319834  | HERVHF_pro  | + |
| Piliocolobus_tephrosceles_PDMG02000082.1 | 3319331  | 3321708  | HERVHF_pol  | + |
| Piliocolobus_tephrosceles_PDMG02000082.1 | 3322282  | 3322734  | HERVHF_3LTR | + |
| Piliocolobus_tephrosceles_PDMG02000090.1 | 2738526  | 2738842  | HERVHF_5LTR | - |
| Piliocolobus_tephrosceles_PDMG02000090.1 | 2739128  | 2740237  | HERVHF_env  | - |
| Piliocolobus_tephrosceles_PDMG02000090.1 | 2740663  | 2744320  | HERVHF_pol  | - |
| Piliocolobus_tephrosceles_PDMG02000090.1 | 2743637  | 2744590  | HERVHF_pro  | - |
| Piliocolobus_tephrosceles_PDMG02000090.1 | 2744618  | 2745193  | HERVHF_gag  | - |
| Piliocolobus_tephrosceles_PDMG02000090.1 | 2746877  | 2747193  | HERVHF_3LTR | - |
| Piliocolobus_tephrosceles_PDMG02000091.1 | 5507238  | 5507626  | HERVHF_5LTR | + |
| Piliocolobus_tephrosceles_PDMG02000091.1 | 5509712  | 5510143  | HERVHF_pro  | + |
| Piliocolobus_tephrosceles_PDMG02000091.1 | 5510302  | 5512917  | HERVHF_pol  | + |
| Piliocolobus_tephrosceles_PDMG02000091.1 | 5513583  | 5513962  | HERVHF_3LTR | + |
| Piliocolobus_tephrosceles_PDMG02000098.1 | 18752699 | 18753158 | HERVHF_5LTR | - |
| Piliocolobus_tephrosceles_PDMG02000098.1 | 18754176 | 18756218 | HERVHF_pol  | - |
| Piliocolobus_tephrosceles_PDMG02000098.1 | 18756521 | 18756877 | HERVHF_gag  | - |
| Piliocolobus_tephrosceles_PDMG02000098.1 | 18758359 | 18758802 | HERVHF_3LTR | - |
| Piliocolobus_tephrosceles_PDMG02000108.1 | 2542050  | 2542456  | HERVHF_5LTR | - |
| Piliocolobus_tephrosceles_PDMG02000108.1 | 2542612  | 2543196  | HERVHF_env  | - |
| Piliocolobus_tephrosceles_PDMG02000108.1 | 2543806  | 2545738  | HERVHF_pol  | - |
| Piliocolobus_tephrosceles_PDMG02000108.1 | 2545124  | 2545861  | HERVHF_pro  | - |
| Piliocolobus_tephrosceles_PDMG02000108.1 | 2545957  | 2546376  | HERVHF_gag  | - |
| Piliocolobus_tephrosceles_PDMG02000108.1 | 2548109  | 2548525  | HERVHF_3LTR | - |

|                                          |          |          |             |   |
|------------------------------------------|----------|----------|-------------|---|
| Piliocolobus_tephrosceles_PDMG02000132.1 | 6638262  | 6638781  | HERVK_5LTR  | - |
| Piliocolobus_tephrosceles_PDMG02000132.1 | 6639541  | 6641623  | HERVK_pol   | - |
| Piliocolobus_tephrosceles_PDMG02000132.1 | 6641371  | 6642316  | HERVK_pro   | - |
| Piliocolobus_tephrosceles_PDMG02000132.1 | 6644031  | 6644555  | HERVK_3LTR  | - |
| Piliocolobus_tephrosceles_PDMG02000136.1 | 2749885  | 2750222  | HERVHF_5LTR | - |
|                                          |          |          |             |   |
| Piliocolobus_tephrosceles_PDMG02000136.1 | 2750701  | 2753382  | HERVHF_env  | - |
| Piliocolobus_tephrosceles_PDMG02000136.1 | 2754160  | 2756389  | HERVHF_pol  | - |
| Piliocolobus_tephrosceles_PDMG02000136.1 | 2755811  | 2756650  | HERVHF_pro  | - |
| Piliocolobus_tephrosceles_PDMG02000136.1 | 2756945  | 2757259  | HERVHF_gag  | - |
| Piliocolobus_tephrosceles_PDMG02000136.1 | 2761261  | 2761583  | HERVHF_3LTR | - |
|                                          |          |          |             |   |
| Piliocolobus_tephrosceles_PDMG02000163.1 | 2170393  | 2170854  | HERVHF_5LTR | - |
|                                          |          |          |             |   |
| Piliocolobus_tephrosceles_PDMG02000163.1 | 2171009  | 2171374  | HERVHF_env  | - |
| Piliocolobus_tephrosceles_PDMG02000163.1 | 2171738  | 2173742  | HERVHF_pol  | - |
| Piliocolobus_tephrosceles_PDMG02000163.1 | 2173407  | 2174045  | HERVHF_pro  | - |
| Piliocolobus_tephrosceles_PDMG02000163.1 | 2174150  | 2174473  | HERVHF_gag  | - |
| Piliocolobus_tephrosceles_PDMG02000163.1 | 2176393  | 2176838  | HERVHF_3LTR | - |
|                                          |          |          |             |   |
| Piliocolobus_tephrosceles_PDMG02000167.1 | 2774572  | 2774933  | HERVHF_5LTR | - |
|                                          |          |          |             |   |
| Piliocolobus_tephrosceles_PDMG02000167.1 | 2775109  | 2775498  | HERVHF_env  | - |
| Piliocolobus_tephrosceles_PDMG02000167.1 | 2778922  | 2780866  | HERVHF_pol  | - |
| Piliocolobus_tephrosceles_PDMG02000167.1 | 2780231  | 2780866  | HERVHF_pro  | - |
| Piliocolobus_tephrosceles_PDMG02000167.1 | 2781617  | 2782261  | HERVHF_gag  | - |
| Piliocolobus_tephrosceles_PDMG02000167.1 | 2783329  | 2783678  | HERVHF_3LTR | - |
|                                          |          |          |             |   |
| Piliocolobus_tephrosceles_PDMG02000167.1 | 5854881  | 5855191  | HERVHF_5LTR | + |
|                                          |          |          |             |   |
| Piliocolobus_tephrosceles_PDMG02000167.1 | 5863929  | 5864756  | HERVHF_pro  | + |
| Piliocolobus_tephrosceles_PDMG02000167.1 | 5864175  | 5865868  | HERVHF_pol  | + |
| Piliocolobus_tephrosceles_PDMG02000167.1 | 5866557  | 5866861  | HERVHF_3LTR | + |
|                                          |          |          |             |   |
| Piliocolobus_tephrosceles_PDMG02000174.1 | 1870054  | 1870406  | HERVK_5LTR  | - |
| Piliocolobus_tephrosceles_PDMG02000174.1 | 1871310  | 1873218  | HERVK_pol   | - |
| Piliocolobus_tephrosceles_PDMG02000174.1 | 1873125  | 1874057  | HERVK_pro   | - |
| Piliocolobus_tephrosceles_PDMG02000174.1 | 1875556  | 1875909  | HERVK_3LTR  | - |
| Piliocolobus_tephrosceles_PDMG02000175.1 | 13496879 | 13497239 | HERVHF_5LTR | - |
|                                          |          |          |             |   |
| Piliocolobus_tephrosceles_PDMG02000175.1 | 13497464 | 13498006 | HERVHF_env  | - |
| Piliocolobus_tephrosceles_PDMG02000175.1 | 13499019 | 13502461 | HERVHF_pol  | - |
| Piliocolobus_tephrosceles_PDMG02000175.1 | 13505042 | 13505410 | HERVHF_3LTR | - |

|                                          |         |         |             |   |
|------------------------------------------|---------|---------|-------------|---|
| Piliocolobus_tephrosceles_PDMG02000180.1 | 4787822 | 4788334 | HERVK_5LTR  | + |
| Piliocolobus_tephrosceles_PDMG02000180.1 | 4789744 | 4790685 | HERVK_pro   | + |
| Piliocolobus_tephrosceles_PDMG02000180.1 | 4790682 | 4791368 | HERVK_pol   | + |
| Piliocolobus_tephrosceles_PDMG02000180.1 | 4792273 | 4792575 | HERVK_env   | + |
| Piliocolobus_tephrosceles_PDMG02000180.1 | 4792782 | 4793293 | HERVK_3LTR  | + |
| Piliocolobus_tephrosceles_PDMG02000180.1 | 4981295 | 4981639 | HERVHF_5LTR | - |
|                                          |         |         |             |   |
| Piliocolobus_tephrosceles_PDMG02000180.1 | 4982118 | 4984218 | HERVHF_pol  | - |
| Piliocolobus_tephrosceles_PDMG02000180.1 | 4983687 | 4984697 | HERVHF_pro  | - |
| Piliocolobus_tephrosceles_PDMG02000180.1 | 4986511 | 4986852 | HERVHF_3LTR | - |
|                                          |         |         |             |   |
| Piliocolobus_tephrosceles_PDMG02000183.1 | 6252580 | 6252906 | HERVHF_5LTR | - |
|                                          |         |         |             |   |
| Piliocolobus_tephrosceles_PDMG02000183.1 | 6253153 | 6253545 | HERVHF_env  | - |
| Piliocolobus_tephrosceles_PDMG02000183.1 | 6254457 | 6257089 | HERVHF_pol  | - |
| Piliocolobus_tephrosceles_PDMG02000183.1 | 6256873 | 6257253 | HERVHF_pro  | - |
| Piliocolobus_tephrosceles_PDMG02000183.1 | 6257323 | 6257925 | HERVHF_gag  | - |
| Piliocolobus_tephrosceles_PDMG02000183.1 | 6259385 | 6259708 | HERVHF_3LTR | - |
|                                          |         |         |             |   |
| Piliocolobus_tephrosceles_PDMG02000190.1 | 1820923 | 1821368 | HERVHF_5LTR | - |
|                                          |         |         |             |   |
| Piliocolobus_tephrosceles_PDMG02000190.1 | 1826027 | 1828176 | HERVHF_pol  | - |
| Piliocolobus_tephrosceles_PDMG02000190.1 | 1828731 | 1830133 | HERVHF_gag  | - |
| Piliocolobus_tephrosceles_PDMG02000190.1 | 1830830 | 1831279 | HERVHF_3LTR | - |
|                                          |         |         |             |   |
| Piliocolobus_tephrosceles_PDMG02000192.1 | 3809365 | 3809730 | HERVHF_5LTR | - |
|                                          |         |         |             |   |
| Piliocolobus_tephrosceles_PDMG02000192.1 | 3810597 | 3812261 | HERVHF_pol  | - |
| Piliocolobus_tephrosceles_PDMG02000192.1 | 3811767 | 3812300 | HERVHF_pro  | - |
| Piliocolobus_tephrosceles_PDMG02000192.1 | 3814528 | 3814892 | HERVHF_3LTR | - |
|                                          |         |         |             |   |
| Piliocolobus_tephrosceles_PDMG02000200.1 | 1384317 | 1384673 | HERVHF_5LTR | - |
|                                          |         |         |             |   |
| Piliocolobus_tephrosceles_PDMG02000200.1 | 1386561 | 1388299 | HERVHF_pol  | - |
| Piliocolobus_tephrosceles_PDMG02000200.1 | 1387763 | 1388299 | HERVHF_pro  | - |
| Piliocolobus_tephrosceles_PDMG02000200.1 | 1389423 | 1389776 | HERVHF_3LTR | - |
|                                          |         |         |             |   |
| Piliocolobus_tephrosceles_PDMG02000239.1 | 5349316 | 5349679 | HERVHF_5LTR | - |
|                                          |         |         |             |   |
| Piliocolobus_tephrosceles_PDMG02000239.1 | 5350112 | 5351160 | HERVHF_pol  | - |
| Piliocolobus_tephrosceles_PDMG02000239.1 | 5353562 | 5353925 | HERVHF_3LTR | - |
|                                          |         |         |             |   |
| Piliocolobus_tephrosceles_PDMG02000261.1 | 3351440 | 3351764 | HERVK_5LTR  | - |
| Piliocolobus_tephrosceles_PDMG02000261.1 | 3352614 | 3354039 | HERVK_pol   | - |



|                                          |         |         |             |   |
|------------------------------------------|---------|---------|-------------|---|
| Piliocolobus_tephrosceles_PDMG02000261.1 | 3353784 | 3354722 | HERVK_pro   | - |
| Piliocolobus_tephrosceles_PDMG02000261.1 | 3355774 | 3356098 | HERVK_3LTR  | - |
| Piliocolobus_tephrosceles_PDMG02000276.1 | 966776  | 967177  | HERVHF_5LTR | - |
| Piliocolobus_tephrosceles_PDMG02000276.1 | 967603  | 969514  | HERVHF_pol  | - |
| Piliocolobus_tephrosceles_PDMG02000276.1 | 969939  | 970241  | HERVHF_gag  | - |
| Piliocolobus_tephrosceles_PDMG02000276.1 | 972494  | 972895  | HERVHF_3LTR | - |
| Piliocolobus_tephrosceles_PDMG02000298.1 | 1273022 | 1273387 | HUERSP_5LTR | + |
| Piliocolobus_tephrosceles_PDMG02000298.1 | 1275764 | 1276156 | HUERSP_gag  | + |
| Piliocolobus_tephrosceles_PDMG02000298.1 | 1276746 | 1277054 | HUERSP_pro  | + |
| Piliocolobus_tephrosceles_PDMG02000298.1 | 1277057 | 1277422 | HUERSP_pol  | + |
| Piliocolobus_tephrosceles_PDMG02000298.1 | 1282646 | 1283019 | HUERSP_3LTR | + |
| Piliocolobus_tephrosceles_PDMG02000303.1 | 1590178 | 1590544 | HERVHF_5LTR | + |
| Piliocolobus_tephrosceles_PDMG02000303.1 | 1592083 | 1592547 | HERVHF_gag  | + |
| Piliocolobus_tephrosceles_PDMG02000303.1 | 1592953 | 1593711 | HERVHF_pro  | + |
| Piliocolobus_tephrosceles_PDMG02000303.1 | 1593085 | 1595640 | HERVHF_pol  | + |
| Piliocolobus_tephrosceles_PDMG02000303.1 | 1596062 | 1596385 | HERVHF_env  | + |
| Piliocolobus_tephrosceles_PDMG02000303.1 | 1596647 | 1597033 | HERVHF_3LTR | + |
| Piliocolobus_tephrosceles_PDMG02000376.1 | 6220079 | 6220473 | HERVHF_5LTR | + |
| Piliocolobus_tephrosceles_PDMG02000376.1 | 6222061 | 6222369 | HERVHF_gag  | + |
| Piliocolobus_tephrosceles_PDMG02000376.1 | 6222506 | 6223228 | HERVHF_pro  | + |
| Piliocolobus_tephrosceles_PDMG02000376.1 | 6222590 | 6224837 | HERVHF_pol  | + |
| Piliocolobus_tephrosceles_PDMG02000376.1 | 6225676 | 6226074 | HERVHF_3LTR | + |
| Piliocolobus_tephrosceles_PDMG02029865.1 | 53484   | 53864   | HERVHF_5LTR | + |
| Piliocolobus_tephrosceles_PDMG02029865.1 | 55216   | 55527   | HERVHF_gag  | + |
| Piliocolobus_tephrosceles_PDMG02029865.1 | 55737   | 57346   | HERVHF_pol  | + |
| Piliocolobus_tephrosceles_PDMG02029865.1 | 58636   | 59019   | HERVHF_env  | + |
| Piliocolobus_tephrosceles_PDMG02029865.1 | 59149   | 59535   | HERVHF_3LTR | + |
| Piliocolobus_tephrosceles_PDMG02030611.1 | 169967  | 170425  | HERVHF_5LTR | - |
| Piliocolobus_tephrosceles_PDMG02030611.1 | 171078  | 174789  | HERVHF_pol  | - |
| Piliocolobus_tephrosceles_PDMG02030611.1 | 174136  | 174912  | HERVHF_pro  | - |
| Piliocolobus_tephrosceles_PDMG02030611.1 | 175395  | 175814  | HERVHF_gag  | - |
| Piliocolobus_tephrosceles_PDMG02030611.1 | 177113  | 177564  | HERVHF_3LTR | - |

|                                          |          |          |             |   |
|------------------------------------------|----------|----------|-------------|---|
| Piliocolobus_tephrosceles_PDMG02031256.1 | 309761   | 310158   | HERVK_5LTR  | + |
| Piliocolobus_tephrosceles_PDMG02031256.1 | 311095   | 311793   | HERVK_pro   | + |
| Piliocolobus_tephrosceles_PDMG02031256.1 | 311728   | 312498   | HERVK_pol   | + |
| Piliocolobus_tephrosceles_PDMG02031256.1 | 313806   | 314216   | HERVK_3LTR  | + |
| Piliocolobus_tephrosceles_PDMG02031489.1 | 1770002  | 1770560  | HERVHF_5LTR | + |
| Piliocolobus_tephrosceles_PDMG02031489.1 | 1773378  | 1773734  | HERVHF_gag  | + |
| Piliocolobus_tephrosceles_PDMG02031489.1 | 1773860  | 1774576  | HERVHF_pro  | + |
| Piliocolobus_tephrosceles_PDMG02031489.1 | 1773938  | 1776277  | HERVHF_pol  | + |
| Piliocolobus_tephrosceles_PDMG02031489.1 | 1783573  | 1784138  | HERVHF_3LTR | + |
| Piliocolobus_tephrosceles_PDMG02031618.1 | 6436991  | 6437348  | HERVHF_5LTR | - |
| Piliocolobus_tephrosceles_PDMG02031618.1 | 6438353  | 6440055  | HERVHF_pol  | - |
| Piliocolobus_tephrosceles_PDMG02031618.1 | 6439399  | 6440184  | HERVHF_pro  | - |
| Piliocolobus_tephrosceles_PDMG02031618.1 | 6442213  | 6442574  | HERVHF_3LTR | - |
| Piliocolobus_tephrosceles_PDMG02032196.1 | 5073863  | 5074254  | HERVHF_5LTR | + |
| Piliocolobus_tephrosceles_PDMG02032196.1 | 5076061  | 5076516  | HERVHF_gag  | + |
| Piliocolobus_tephrosceles_PDMG02032196.1 | 5076523  | 5077443  | HERVHF_pro  | + |
| Piliocolobus_tephrosceles_PDMG02032196.1 | 5076946  | 5079569  | HERVHF_pol  | + |
| Piliocolobus_tephrosceles_PDMG02032196.1 | 5080995  | 5081670  | HERVHF_env  | + |
| Piliocolobus_tephrosceles_PDMG02032196.1 | 5082001  | 5082380  | HERVHF_3LTR | + |
| Piliocolobus_tephrosceles_PDMG02032196.1 | 24765062 | 24765455 | HERVHF_5LTR | - |
| Piliocolobus_tephrosceles_PDMG02032196.1 | 24765625 | 24766202 | HERVHF_env  | - |
| Piliocolobus_tephrosceles_PDMG02032196.1 | 24766679 | 24769026 | HERVHF_pol  | - |
| Piliocolobus_tephrosceles_PDMG02032196.1 | 24768349 | 24769155 | HERVHF_pro  | - |
| Piliocolobus_tephrosceles_PDMG02032196.1 | 24769208 | 24769537 | HERVHF_gag  | - |
| Piliocolobus_tephrosceles_PDMG02032196.1 | 24771337 | 24771712 | HERVHF_3LTR | - |
| Pithecia_pithecia_tarseq_1               | 39782320 | 39782707 | HERVHF_5LTR | + |
| Pithecia_pithecia_tarseq_1               | 39784743 | 39785075 | HERVHF_gag  | + |
| Pithecia_pithecia_tarseq_1               | 39785582 | 39786301 | HERVHF_pol  | + |
| Pithecia_pithecia_tarseq_1               | 39788521 | 39788913 | HERVHF_3LTR | + |
| Pithecia_pithecia_tarseq_113             | 91836    | 92176    | HERVHF_5LTR | - |
| Pithecia_pithecia_tarseq_113             | 92400    | 92702    | HERVHF_env  | - |
| Pithecia_pithecia_tarseq_113             | 92993    | 93740    | HERVHF_pol  | - |
| Pithecia_pithecia_tarseq_113             | 94218    | 94745    | HERVHF_gag  | - |
| Pithecia_pithecia_tarseq_113             | 95950    | 96299    | HERVHF_3LTR | - |
| Pithecia_pithecia_tarseq_16              | 9127813  | 9128180  | HERVHF_5LTR | - |
| Pithecia_pithecia_tarseq_16              | 9128756  | 9130152  | HERVHF_pol  | - |

|                              |          |          |               |   |
|------------------------------|----------|----------|---------------|---|
| Pithecia_pithecia_tarseq_16  | 9131035  | 9131538  | HERVHF_gag    | - |
| Pithecia_pithecia_tarseq_16  | 9133344  | 9133705  | HERVHF_3LTR   | - |
| Pithecia_pithecia_tarseq_21  | 55910    | 56529    | HERVHF_5LTR   | - |
| Pithecia_pithecia_tarseq_21  | 58300    | 59157    | HERVHF_pol    | - |
| Pithecia_pithecia_tarseq_21  | 59153    | 59764    | HERVHF_pro    | - |
| Pithecia_pithecia_tarseq_21  | 60326    | 60709    | HERVHF_gag    | - |
| Pithecia_pithecia_tarseq_21  | 62030    | 62647    | HERVHF_3LTR   | - |
| Pithecia_pithecia_tarseq_22  | 10724611 | 10725107 | HERVHF_5LTR   | + |
| Pithecia_pithecia_tarseq_22  | 10728630 | 10729634 | HERVHF_pol    | + |
| Pithecia_pithecia_tarseq_22  | 10730924 | 10731435 | HERVHF_3LTR   | + |
| Pithecia_pithecia_tarseq_289 | 1132978  | 1133506  | HERVHF_5LTR   | - |
| Pithecia_pithecia_tarseq_289 | 1135593  | 1136303  | HERVHF_pol    | - |
| Pithecia_pithecia_tarseq_289 | 1139294  | 1139833  | HERVHF_3LTR   | - |
| Pithecia_pithecia_tarseq_309 | 541887   | 542287   | HERVHF_5LTR   | + |
| Pithecia_pithecia_tarseq_309 | 543513   | 543818   | HERVHF_pro    | + |
| Pithecia_pithecia_tarseq_309 | 543844   | 546178   | HERVHF_pol    | + |
| Pithecia_pithecia_tarseq_309 | 548227   | 548627   | HERVHF_3LTR   | + |
| Pithecia_pithecia_tarseq_60  | 443111   | 443568   | HERVHF_5LTR   | - |
| Pithecia_pithecia_tarseq_60  | 444406   | 445748   | HERVHF_pol    | - |
| Pithecia_pithecia_tarseq_60  | 446336   | 446788   | HERVHF_gag    | - |
| Pithecia_pithecia_tarseq_60  | 448725   | 449186   | HERVHF_3LTR   | - |
| Pithecia_pithecia_tarseq_62  | 478764   | 479096   | HSERVIII_5LTR | + |
| Pithecia_pithecia_tarseq_62  | 481494   | 483886   | HSERVIII_pol  | + |
| Pithecia_pithecia_tarseq_62  | 484771   | 485105   | HSERVIII_3LTR | + |
| Pithecia_pithecia_tarseq_647 | 29477    | 29963    | HERVHF_5LTR   | + |
| Pithecia_pithecia_tarseq_647 | 35431    | 36687    | HERVHF_pol    | + |
| Pithecia_pithecia_tarseq_647 | 38602    | 39098    | HERVHF_3LTR   | + |
| Pithecia_pithecia_tarseq_72  | 1916066  | 1916385  | HERVHF_5LTR   | - |
| Pithecia_pithecia_tarseq_72  | 1916802  | 1917116  | HERVHF_env    | - |
| Pithecia_pithecia_tarseq_72  | 1917501  | 1917974  | HERVHF_pol    | - |
| Pithecia_pithecia_tarseq_72  | 1918101  | 1918703  | HERVHF_pro    | - |
| Pithecia_pithecia_tarseq_72  | 1920454  | 1920766  | HERVHF_3LTR   | - |
| Pithecia_pithecia_tarseq_98  | 1488724  | 1489190  | HERVHF_5LTR   | - |
| Pithecia_pithecia_tarseq_98  | 1491472  | 1493910  | HERVHF_pol    | - |
| Pithecia_pithecia_tarseq_98  | 1496488  | 1496959  | HERVHF_3LTR   | - |
| Pongo_abelii_CM009262.2      | 2031053  | 2031430  | HERVK_5LTR    | - |
| Pongo_abelii_CM009262.2      | 2032354  | 2034243  | HERVK_pol     | - |
| Pongo_abelii_CM009262.2      | 2034162  | 2035071  | HERVK_pro     | - |
| Pongo_abelii_CM009262.2      | 2036055  | 2036436  | HERVK_3LTR    | - |
| Pongo_abelii_CM009262.2      | 7686928  | 7687328  | HERVHF_5LTR   | - |
| Pongo_abelii_CM009262.2      | 7687782  | 7689865  | HERVHF_pol    | - |
| Pongo_abelii_CM009262.2      | 7692490  | 7692896  | HERVHF_3LTR   | - |
| Pongo_abelii_CM009262.2      | 12381425 | 12381864 | HERVHF_5LTR   | + |
| Pongo_abelii_CM009262.2      | 12383513 | 12383812 | HERVHF_gag    | + |

|                         |           |           |             |   |
|-------------------------|-----------|-----------|-------------|---|
| Pongo_abelii_CM009262.2 | 12383913  | 12384641  | HERVHF_pro  | + |
| Pongo_abelii_CM009262.2 | 12384066  | 12384689  | HERVHF_pol  | + |
| Pongo_abelii_CM009262.2 | 12386603  | 12387034  | HERVHF_3LTR | + |
| Pongo_abelii_CM009262.2 | 17574035  | 17574466  | HERVHF_5LTR | + |
| Pongo_abelii_CM009262.2 | 17575984  | 17576385  | HERVHF_gag  | + |
| Pongo_abelii_CM009262.2 | 17576558  | 17577262  | HERVHF_pro  | + |
| Pongo_abelii_CM009262.2 | 17576624  | 17578431  | HERVHF_pol  | + |
| Pongo_abelii_CM009262.2 | 17579812  | 17580242  | HERVHF_3LTR | + |
| Pongo_abelii_CM009262.2 | 20045039  | 20045492  | HERVHF_5LTR | - |
| Pongo_abelii_CM009262.2 | 20046528  | 20048526  | HERVHF_pol  | - |
| Pongo_abelii_CM009262.2 | 20048029  | 20048778  | HERVHF_pro  | - |
| Pongo_abelii_CM009262.2 | 20048861  | 20049277  | HERVHF_gag  | - |
| Pongo_abelii_CM009262.2 | 20050895  | 20051348  | HERVHF_3LTR | - |
| Pongo_abelii_CM009262.2 | 20267865  | 20268319  | HERVHF_5LTR | - |
| Pongo_abelii_CM009262.2 | 20268919  | 20270532  | HERVHF_pol  | - |
| Pongo_abelii_CM009262.2 | 20269969  | 20270820  | HERVHF_pro  | - |
| Pongo_abelii_CM009262.2 | 20270896  | 20271381  | HERVHF_gag  | - |
| Pongo_abelii_CM009262.2 | 20272884  | 20273336  | HERVHF_3LTR | - |
| Pongo_abelii_CM009262.2 | 24787365  | 24787722  | HERVHF_5LTR | + |
| Pongo_abelii_CM009262.2 | 24789781  | 24790716  | HERVHF_pro  | + |
| Pongo_abelii_CM009262.2 | 24789988  | 24792275  | HERVHF_pol  | + |
| Pongo_abelii_CM009262.2 | 24793156  | 24793511  | HERVHF_3LTR | + |
| Pongo_abelii_CM009262.2 | 27414830  | 27415264  | HERVHF_5LTR | + |
| Pongo_abelii_CM009262.2 | 27416775  | 27417098  | HERVHF_gag  | + |
| Pongo_abelii_CM009262.2 | 27417512  | 27419597  | HERVHF_pol  | + |
| Pongo_abelii_CM009262.2 | 27419981  | 27420420  | HERVHF_3LTR | + |
| Pongo_abelii_CM009262.2 | 33492013  | 33492358  | HERVHF_5LTR | - |
| Pongo_abelii_CM009262.2 | 33492817  | 33494992  | HERVHF_pol  | - |
| Pongo_abelii_CM009262.2 | 33494432  | 33495190  | HERVHF_pro  | - |
| Pongo_abelii_CM009262.2 | 33495268  | 33495651  | HERVHF_gag  | - |
| Pongo_abelii_CM009262.2 | 33497235  | 33497583  | HERVHF_3LTR | - |
| Pongo_abelii_CM009262.2 | 66363526  | 66363978  | HERVHF_5LTR | - |
| Pongo_abelii_CM009262.2 | 66364390  | 66366522  | HERVHF_pol  | - |
| Pongo_abelii_CM009262.2 | 66365980  | 66366810  | HERVHF_pro  | - |
| Pongo_abelii_CM009262.2 | 66366817  | 66367134  | HERVHF_gag  | - |
| Pongo_abelii_CM009262.2 | 66368888  | 66369340  | HERVHF_3LTR | - |
| Pongo_abelii_CM009262.2 | 128252916 | 128253317 | HERVHF_5LTR | + |
| Pongo_abelii_CM009262.2 | 128254629 | 128255099 | HERVHF_gag  | + |
| Pongo_abelii_CM009262.2 | 128255220 | 128256065 | HERVHF_pro  | + |
| Pongo_abelii_CM009262.2 | 128255463 | 128257775 | HERVHF_pol  | + |
| Pongo_abelii_CM009262.2 | 128258702 | 128259098 | HERVHF_3LTR | + |
| Pongo_abelii_CM009262.2 | 137147267 | 137147669 | HERVHF_5LTR | + |
| Pongo_abelii_CM009262.2 | 137149297 | 137149626 | HERVHF_gag  | + |
| Pongo_abelii_CM009262.2 | 137149663 | 137150481 | HERVHF_pro  | + |

|                         |           |           |                |   |
|-------------------------|-----------|-----------|----------------|---|
| Pongo_abelii_CM009262.2 | 137149921 | 137151995 | HERVHF_pol     | + |
| Pongo_abelii_CM009262.2 | 137152502 | 137152909 | HERVHF_3LTR    | + |
| Pongo_abelii_CM009262.2 | 143077354 | 143077811 | HERVHF_5LTR    | - |
| Pongo_abelii_CM009262.2 | 143078260 | 143080150 | HERVHF_pol     | - |
| Pongo_abelii_CM009262.2 | 143080629 | 143081045 | HERVHF_gag     | - |
| Pongo_abelii_CM009262.2 | 143082726 | 143083184 | HERVHF_3LTR    | - |
| Pongo_abelii_CM009262.2 | 143775240 | 143775691 | HERVHF_5LTR    | - |
| Pongo_abelii_CM009262.2 | 143776147 | 143778235 | HERVHF_pol     | - |
| Pongo_abelii_CM009262.2 | 143777693 | 143778478 | HERVHF_pro     | - |
| Pongo_abelii_CM009262.2 | 143778594 | 143779078 | HERVHF_gag     | - |
| Pongo_abelii_CM009262.2 | 143780632 | 143781073 | HERVHF_3LTR    | - |
| Pongo_abelii_CM009262.2 | 150433010 | 150433372 | HERVHF_5LTR    | + |
| Pongo_abelii_CM009262.2 | 150434984 | 150435310 | HERVHF_gag     | + |
| Pongo_abelii_CM009262.2 | 150435746 | 150437537 | HERVHF_pol     | + |
| Pongo_abelii_CM009262.2 | 150438172 | 150438520 | HERVHF_3LTR    | + |
| Pongo_abelii_CM009262.2 | 154405136 | 154405575 | HERVHF_5LTR    | + |
| Pongo_abelii_CM009262.2 | 154407414 | 154407779 | HERVHF_gag     | + |
| Pongo_abelii_CM009262.2 | 154407931 | 154408638 | HERVHF_pro     | + |
| Pongo_abelii_CM009262.2 | 154407997 | 154410233 | HERVHF_pol     | + |
| Pongo_abelii_CM009262.2 | 154410630 | 154411078 | HERVHF_3LTR    | + |
| Pongo_abelii_CM009262.2 | 156880879 | 156881292 | HERVHF_5LTR    | - |
| Pongo_abelii_CM009262.2 | 156881773 | 156883855 | HERVHF_pol     | - |
| Pongo_abelii_CM009262.2 | 156883292 | 156884092 | HERVHF_pro     | - |
| Pongo_abelii_CM009262.2 | 156884159 | 156884467 | HERVHF_gag     | - |
| Pongo_abelii_CM009262.2 | 156886127 | 156886538 | HERVHF_3LTR    | - |
| Pongo_abelii_CM009262.2 | 157112803 | 157113221 | HERVHF_5LTR    | - |
| Pongo_abelii_CM009262.2 | 157113388 | 157113744 | HERVHF_env     | - |
| Pongo_abelii_CM009262.2 | 157114689 | 157116507 | HERVHF_pol     | - |
| Pongo_abelii_CM009262.2 | 157116136 | 157116906 | HERVHF_pro     | - |
| Pongo_abelii_CM009262.2 | 157116965 | 157117399 | HERVHF_gag     | - |
| Pongo_abelii_CM009262.2 | 157118789 | 157119207 | HERVHF_3LTR    | - |
| Pongo_abelii_CM009262.2 | 181919184 | 181919537 | HERVIPADP_5LTR | + |
| Pongo_abelii_CM009262.2 | 181921264 | 181921641 | HERVIPADP_gag  | + |
| Pongo_abelii_CM009262.2 | 181922152 | 181925613 | HERVIPADP_pol  | + |
| Pongo_abelii_CM009262.2 | 181926869 | 181927477 | HERVIPADP_env  | + |
| Pongo_abelii_CM009262.2 | 181927650 | 181928012 | HERVIPADP_3LTR | + |
| Pongo_abelii_CM009262.2 | 190775617 | 190776075 | HERVHF_5LTR    | - |
| Pongo_abelii_CM009262.2 | 190776662 | 190778551 | HERVHF_pol     | - |
| Pongo_abelii_CM009262.2 | 190778009 | 190778794 | HERVHF_pro     | - |
| Pongo_abelii_CM009262.2 | 190778882 | 190779307 | HERVHF_gag     | - |
| Pongo_abelii_CM009262.2 | 190781214 | 190781668 | HERVHF_3LTR    | - |
| Pongo_abelii_CM009263.2 | 25995419  | 25995830  | HERVHF_5LTR    | + |
| Pongo_abelii_CM009263.2 | 25998083  | 25998658  | HERVHF_pro     | + |
| Pongo_abelii_CM009263.2 | 25998308  | 26000009  | HERVHF_pol     | + |

|                         |           |           |             |   |
|-------------------------|-----------|-----------|-------------|---|
| Pongo_abelii_CM009263.2 | 26000631  | 26001041  | HERVHF_3LTR | + |
| Pongo_abelii_CM009263.2 | 27356039  | 27356470  | HERVHF_5LTR | - |
| Pongo_abelii_CM009263.2 | 27357461  | 27358991  | HERVHF_pol  | - |
| Pongo_abelii_CM009263.2 | 27358410  | 27359048  | HERVHF_pro  | - |
| Pongo_abelii_CM009263.2 | 27359265  | 27359564  | HERVHF_gag  | - |
| Pongo_abelii_CM009263.2 | 27361467  | 27361898  | HERVHF_3LTR | - |
| Pongo_abelii_CM009263.2 | 37915349  | 37915740  | HERVHF_5LTR | - |
| Pongo_abelii_CM009263.2 | 37916326  | 37918447  | HERVHF_pol  | - |
| Pongo_abelii_CM009263.2 | 37917809  | 37918639  | HERVHF_pro  | - |
| Pongo_abelii_CM009263.2 | 37921067  | 37921455  | HERVHF_3LTR | - |
| Pongo_abelii_CM009263.2 | 41220858  | 41221259  | HERVHF_5LTR | - |
| Pongo_abelii_CM009263.2 | 41221722  | 41223874  | HERVHF_pol  | - |
| Pongo_abelii_CM009263.2 | 41223473  | 41224225  | HERVHF_pro  | - |
| Pongo_abelii_CM009263.2 | 41224343  | 41224654  | HERVHF_gag  | - |
| Pongo_abelii_CM009263.2 | 41226425  | 41226824  | HERVHF_3LTR | - |
| Pongo_abelii_CM009263.2 | 44516283  | 44516653  | HERVHF_5LTR | + |
| Pongo_abelii_CM009263.2 | 44518177  | 44518713  | HERVHF_gag  | + |
| Pongo_abelii_CM009263.2 | 44519229  | 44520941  | HERVHF_pol  | + |
| Pongo_abelii_CM009263.2 | 44521999  | 44522377  | HERVHF_3LTR | + |
| Pongo_abelii_CM009263.2 | 50233905  | 50234315  | HERVHF_5LTR | - |
| Pongo_abelii_CM009263.2 | 50234706  | 50236925  | HERVHF_pol  | - |
| Pongo_abelii_CM009263.2 | 50237230  | 50237580  | HERVHF_gag  | - |
| Pongo_abelii_CM009263.2 | 50239222  | 50239627  | HERVHF_3LTR | - |
| Pongo_abelii_CM009263.2 | 70793958  | 70794283  | HERVHF_5LTR | + |
| Pongo_abelii_CM009263.2 | 70796112  | 70796492  | HERVHF_gag  | + |
| Pongo_abelii_CM009263.2 | 70796767  | 70798755  | HERVHF_pol  | + |
| Pongo_abelii_CM009263.2 | 70799331  | 70799658  | HERVHF_3LTR | + |
| Pongo_abelii_CM009263.2 | 88996285  | 88996717  | HERVHF_5LTR | - |
| Pongo_abelii_CM009263.2 | 88997252  | 88999176  | HERVHF_pol  | - |
| Pongo_abelii_CM009263.2 | 88998637  | 88999416  | HERVHF_pro  | - |
| Pongo_abelii_CM009263.2 | 89001260  | 89001684  | HERVHF_3LTR | - |
| Pongo_abelii_CM009263.2 | 89157535  | 89157872  | HERVK_5LTR  | - |
| Pongo_abelii_CM009263.2 | 89158136  | 89158456  | HERVK_env   | - |
| Pongo_abelii_CM009263.2 | 89159528  | 89160298  | HERVK_pol   | - |
| Pongo_abelii_CM009263.2 | 89160682  | 89161107  | HERVK_pro   | - |
| Pongo_abelii_CM009263.2 | 89160972  | 89162362  | HERVK_gag   | - |
| Pongo_abelii_CM009263.2 | 89162821  | 89163154  | HERVK_3LTR  | - |
| Pongo_abelii_CM009263.2 | 96038159  | 96038623  | HERVHF_5LTR | + |
| Pongo_abelii_CM009263.2 | 96040802  | 96041680  | HERVHF_pro  | + |
| Pongo_abelii_CM009263.2 | 96041087  | 96043181  | HERVHF_pol  | + |
| Pongo_abelii_CM009263.2 | 96043584  | 96044065  | HERVHF_3LTR | + |
| Pongo_abelii_CM009263.2 | 104708825 | 104709278 | HERVHF_5LTR | - |
| Pongo_abelii_CM009263.2 | 104709853 | 104711862 | HERVHF_pol  | - |
| Pongo_abelii_CM009263.2 | 104711302 | 104711853 | HERVHF_pro  | - |

|                         |           |           |             |   |
|-------------------------|-----------|-----------|-------------|---|
| Pongo_abelii_CM009263.2 | 104714293 | 104714750 | HERVHF_3LTR | - |
| Pongo_abelii_CM009264.2 | 26196467  | 26196882  | HERVHF_5LTR | + |
| Pongo_abelii_CM009264.2 | 26198230  | 26198607  | HERVHF_gag  | + |
| Pongo_abelii_CM009264.2 | 26198672  | 26199475  | HERVHF_pro  | + |
| Pongo_abelii_CM009264.2 | 26199170  | 26200782  | HERVHF_pol  | + |
| Pongo_abelii_CM009264.2 | 26202041  | 26202456  | HERVHF_3LTR | + |
| Pongo_abelii_CM009264.2 | 66878044  | 66878498  | HERVHF_5LTR | - |
| Pongo_abelii_CM009264.2 | 66878951  | 66881064  | HERVHF_pol  | - |
| Pongo_abelii_CM009264.2 | 66881314  | 66881730  | HERVHF_gag  | - |
| Pongo_abelii_CM009264.2 | 66883270  | 66883722  | HERVHF_3LTR | - |
| Pongo_abelii_CM009264.2 | 73870221  | 73870535  | HERVHF_5LTR | + |
| Pongo_abelii_CM009264.2 | 73872537  | 73872836  | HERVHF_gag  | + |
| Pongo_abelii_CM009264.2 | 73872860  | 73873693  | HERVHF_pro  | + |
| Pongo_abelii_CM009264.2 | 73873151  | 73875071  | HERVHF_pol  | + |
| Pongo_abelii_CM009264.2 | 73875623  | 73875956  | HERVHF_3LTR | + |
| Pongo_abelii_CM009264.2 | 74122165  | 74122614  | HERVHF_5LTR | - |
| Pongo_abelii_CM009264.2 | 74123062  | 74124963  | HERVHF_pol  | - |
| Pongo_abelii_CM009264.2 | 74125055  | 74125378  | HERVHF_pro  | - |
| Pongo_abelii_CM009264.2 | 74127528  | 74127976  | HERVHF_3LTR | - |
| Pongo_abelii_CM009264.2 | 78648303  | 78648736  | HERVHF_5LTR | + |
| Pongo_abelii_CM009264.2 | 78650461  | 78650760  | HERVHF_gag  | + |
| Pongo_abelii_CM009264.2 | 78651007  | 78651609  | HERVHF_pro  | + |
| Pongo_abelii_CM009264.2 | 78651172  | 78653155  | HERVHF_pol  | + |
| Pongo_abelii_CM009264.2 | 78653553  | 78653996  | HERVHF_3LTR | + |
| Pongo_abelii_CM009264.2 | 79441068  | 79441410  | HERVHF_5LTR | + |
| Pongo_abelii_CM009264.2 | 79442793  | 79443173  | HERVHF_gag  | + |
| Pongo_abelii_CM009264.2 | 79443285  | 79444064  | HERVHF_pro  | + |
| Pongo_abelii_CM009264.2 | 79443522  | 79445021  | HERVHF_pol  | + |
| Pongo_abelii_CM009264.2 | 79446370  | 79446954  | HERVHF_env  | + |
| Pongo_abelii_CM009264.2 | 79447167  | 79447521  | HERVHF_3LTR | + |
| Pongo_abelii_CM009264.2 | 93734580  | 93735033  | HERVHF_5LTR | - |
| Pongo_abelii_CM009264.2 | 93735445  | 93737567  | HERVHF_pol  | - |
| Pongo_abelii_CM009264.2 | 93736971  | 93737831  | HERVHF_pro  | - |
| Pongo_abelii_CM009264.2 | 93737859  | 93738182  | HERVHF_gag  | - |
| Pongo_abelii_CM009264.2 | 93740006  | 93740462  | HERVHF_3LTR | - |
| Pongo_abelii_CM009264.2 | 93890568  | 93890939  | HERVHF_5LTR | + |
| Pongo_abelii_CM009264.2 | 93892630  | 93893033  | HERVHF_gag  | + |
| Pongo_abelii_CM009264.2 | 93893126  | 93893713  | HERVHF_pro  | + |
| Pongo_abelii_CM009264.2 | 93893663  | 93895177  | HERVHF_pol  | + |
| Pongo_abelii_CM009264.2 | 93896219  | 93896590  | HERVHF_3LTR | + |
| Pongo_abelii_CM009264.2 | 95972195  | 95972648  | HERVHF_5LTR | + |
| Pongo_abelii_CM009264.2 | 95974700  | 95975713  | HERVHF_pro  | + |
| Pongo_abelii_CM009264.2 | 95975000  | 95977063  | HERVHF_pol  | + |
| Pongo_abelii_CM009264.2 | 95978086  | 95978536  | HERVHF_3LTR | + |

|                         |           |           |                |   |
|-------------------------|-----------|-----------|----------------|---|
| Pongo_abelii_CM009264.2 | 105266424 | 105266857 | HERVHF_5LTR    | - |
| Pongo_abelii_CM009264.2 | 105267257 | 105269197 | HERVHF_pol     | - |
| Pongo_abelii_CM009264.2 | 105269128 | 105269673 | HERVHF_pro     | - |
| Pongo_abelii_CM009264.2 | 105271831 | 105272262 | HERVHF_3LTR    | - |
| Pongo_abelii_CM009264.2 | 111215680 | 111216081 | HERVHF_5LTR    | - |
| Pongo_abelii_CM009264.2 | 111216517 | 111218978 | HERVHF_pol     | - |
| Pongo_abelii_CM009264.2 | 111219017 | 111219409 | HERVHF_pro     | - |
| Pongo_abelii_CM009264.2 | 111219442 | 111219741 | HERVHF_gag     | - |
| Pongo_abelii_CM009264.2 | 111221430 | 111221829 | HERVHF_3LTR    | - |
| Pongo_abelii_CM009264.2 | 111354527 | 111354926 | HERVHF_5LTR    | + |
| Pongo_abelii_CM009264.2 | 111356580 | 111356948 | HERVHF_gag     | + |
| Pongo_abelii_CM009264.2 | 111357283 | 111359223 | HERVHF_pol     | + |
| Pongo_abelii_CM009264.2 | 111359816 | 111360218 | HERVHF_3LTR    | + |
| Pongo_abelii_CM009264.2 | 111425407 | 111425820 | HERVHF_5LTR    | + |
| Pongo_abelii_CM009264.2 | 111428178 | 111430252 | HERVHF_pol     | + |
| Pongo_abelii_CM009264.2 | 111430691 | 111431115 | HERVHF_3LTR    | + |
| Pongo_abelii_CM009264.2 | 124887811 | 124888223 | HERVHF_5LTR    | + |
| Pongo_abelii_CM009264.2 | 124889933 | 124890253 | HERVHF_gag     | + |
| Pongo_abelii_CM009264.2 | 124890805 | 124892760 | HERVHF_pol     | + |
| Pongo_abelii_CM009264.2 | 124893169 | 124893582 | HERVHF_3LTR    | + |
| Pongo_abelii_CM009265.2 | 5077589   | 5077907   | HERVHF_5LTR    | - |
| Pongo_abelii_CM009265.2 | 5078432   | 5080844   | HERVHF_pol     | - |
| Pongo_abelii_CM009265.2 | 5080859   | 5081638   | HERVHF_pro     | - |
| Pongo_abelii_CM009265.2 | 5081297   | 5081737   | HERVHF_gag     | - |
| Pongo_abelii_CM009265.2 | 5083219   | 5083535   | HERVHF_3LTR    | - |
| Pongo_abelii_CM009265.2 | 22546483  | 22546834  | HERVHF_5LTR    | + |
| Pongo_abelii_CM009265.2 | 22549075  | 22549857  | HERVHF_pro     | + |
| Pongo_abelii_CM009265.2 | 22549534  | 22551244  | HERVHF_pol     | + |
| Pongo_abelii_CM009265.2 | 22551856  | 22552217  | HERVHF_3LTR    | + |
| Pongo_abelii_CM009265.2 | 57867850  | 57868262  | HERVHF_5LTR    | - |
| Pongo_abelii_CM009265.2 | 57868831  | 57870793  | HERVHF_pol     | - |
| Pongo_abelii_CM009265.2 | 57870254  | 57871084  | HERVHF_pro     | - |
| Pongo_abelii_CM009265.2 | 57871108  | 57871407  | HERVHF_gag     | - |
| Pongo_abelii_CM009265.2 | 57873083  | 57873495  | HERVHF_3LTR    | - |
| Pongo_abelii_CM009265.2 | 59657004  | 59657392  | HERVHF_5LTR    | - |
| Pongo_abelii_CM009265.2 | 59658039  | 59659935  | HERVHF_pol     | - |
| Pongo_abelii_CM009265.2 | 59659393  | 59660226  | HERVHF_pro     | - |
| Pongo_abelii_CM009265.2 | 59662389  | 59662779  | HERVHF_3LTR    | - |
| Pongo_abelii_CM009265.2 | 60942563  | 60942896  | HERVIPADP_5LTR | + |
| Pongo_abelii_CM009265.2 | 60944420  | 60944743  | HERVIPADP_gag  | + |
| Pongo_abelii_CM009265.2 | 60945870  | 60948814  | HERVIPADP_pol  | + |
| Pongo_abelii_CM009265.2 | 60950949  | 60951288  | HERVIPADP_3LTR | + |
| Pongo_abelii_CM009265.2 | 64970361  | 64970813  | HERVHF_5LTR    | + |
| Pongo_abelii_CM009265.2 | 64972431  | 64972754  | HERVHF_gag     | + |



|                         |           |           |                |   |
|-------------------------|-----------|-----------|----------------|---|
| Pongo_abelii_CM009265.2 | 64972810  | 64973586  | HERVHF_pro     | + |
| Pongo_abelii_CM009265.2 | 64972948  | 64975126  | HERVHF_pol     | + |
| Pongo_abelii_CM009265.2 | 64976136  | 64976588  | HERVHF_3LTR    | + |
| Pongo_abelii_CM009265.2 | 68466585  | 68467038  | HERVHF_5LTR    | + |
| Pongo_abelii_CM009265.2 | 68468654  | 68471028  | HERVHF_gag     | + |
| Pongo_abelii_CM009265.2 | 68471080  | 68471844  | HERVHF_pro     | + |
| Pongo_abelii_CM009265.2 | 68471323  | 68473254  | HERVHF_pol     | + |
| Pongo_abelii_CM009265.2 | 68473859  | 68474306  | HERVHF_3LTR    | + |
| Pongo_abelii_CM009265.2 | 69536064  | 69536489  | HERVHF_5LTR    | - |
| Pongo_abelii_CM009265.2 | 69536908  | 69539271  | HERVHF_pol     | - |
| Pongo_abelii_CM009265.2 | 69538669  | 69539523  | HERVHF_pro     | - |
| Pongo_abelii_CM009265.2 | 69539527  | 69539850  | HERVHF_gag     | - |
| Pongo_abelii_CM009265.2 | 69541419  | 69541842  | HERVHF_3LTR    | - |
| Pongo_abelii_CM009265.2 | 71126290  | 71126704  | HERVHF_5LTR    | + |
| Pongo_abelii_CM009265.2 | 71128035  | 71128403  | HERVHF_gag     | + |
| Pongo_abelii_CM009265.2 | 71128693  | 71129490  | HERVHF_pro     | + |
| Pongo_abelii_CM009265.2 | 71129086  | 71131244  | HERVHF_pol     | + |
| Pongo_abelii_CM009265.2 | 71131694  | 71132108  | HERVHF_3LTR    | + |
| Pongo_abelii_CM009265.2 | 95252236  | 95252688  | HERVHF_5LTR    | + |
| Pongo_abelii_CM009265.2 | 95255177  | 95257110  | HERVHF_pol     | + |
| Pongo_abelii_CM009265.2 | 95257564  | 95258013  | HERVHF_3LTR    | + |
| Pongo_abelii_CM009265.2 | 95561153  | 95561617  | HERVK_5LTR     | + |
| Pongo_abelii_CM009265.2 | 95563108  | 95564049  | HERVK_pro      | + |
| Pongo_abelii_CM009265.2 | 95563908  | 95565485  | HERVK_pol      | + |
| Pongo_abelii_CM009265.2 | 95566765  | 95567235  | HERVK_3LTR     | + |
| Pongo_abelii_CM009265.2 | 102346464 | 102346874 | HERVHF_5LTR    | + |
| Pongo_abelii_CM009265.2 | 102348523 | 102348846 | HERVHF_gag     | + |
| Pongo_abelii_CM009265.2 | 102348972 | 102349754 | HERVHF_pro     | + |
| Pongo_abelii_CM009265.2 | 102349167 | 102351170 | HERVHF_pol     | + |
| Pongo_abelii_CM009265.2 | 102353314 | 102353727 | HERVHF_3LTR    | + |
| Pongo_abelii_CM009265.2 | 106108830 | 106109193 | HERVHF_5LTR    | + |
| Pongo_abelii_CM009265.2 | 106111247 | 106111837 | HERVHF_gag     | + |
| Pongo_abelii_CM009265.2 | 106112011 | 106112673 | HERVHF_pro     | + |
| Pongo_abelii_CM009265.2 | 106112092 | 106114041 | HERVHF_pol     | + |
| Pongo_abelii_CM009265.2 | 106114612 | 106114987 | HERVHF_3LTR    | + |
| Pongo_abelii_CM009265.2 | 125489170 | 125489531 | HERVHF_5LTR    | - |
| Pongo_abelii_CM009265.2 | 125490212 | 125492152 | HERVHF_pol     | - |
| Pongo_abelii_CM009265.2 | 125492475 | 125492855 | HERVHF_gag     | - |
| Pongo_abelii_CM009265.2 | 125494560 | 125494923 | HERVHF_3LTR    | - |
| Pongo_abelii_CM009265.2 | 126226306 | 126226666 | HERVIPADP_5LTR | + |
| Pongo_abelii_CM009265.2 | 126229093 | 126232393 | HERVIPADP_pol  | + |
| Pongo_abelii_CM009265.2 | 126233474 | 126233851 | HERVIPADP_env  | + |
| Pongo_abelii_CM009265.2 | 126234589 | 126234946 | HERVIPADP_3LTR | + |
| Pongo_abelii_CM009265.2 | 131583781 | 131584217 | HERVHF_5LTR    | - |

|                         |           |           |             |   |
|-------------------------|-----------|-----------|-------------|---|
| Pongo_abelii_CM009265.2 | 131584445 | 131586841 | HERVHF_pol  | - |
| Pongo_abelii_CM009265.2 | 131586227 | 131587006 | HERVHF_pro  | - |
| Pongo_abelii_CM009265.2 | 131587129 | 131587452 | HERVHF_gag  | - |
| Pongo_abelii_CM009265.2 | 131589218 | 131589652 | HERVHF_3LTR | - |
| Pongo_abelii_CM009265.2 | 134640111 | 134640468 | HERVHF_5LTR | + |
| Pongo_abelii_CM009265.2 | 134642158 | 134642481 | HERVHF_gag  | + |
| Pongo_abelii_CM009265.2 | 134642912 | 134645063 | HERVHF_pol  | + |
| Pongo_abelii_CM009265.2 | 134645269 | 134645600 | HERVHF_3LTR | + |
| Pongo_abelii_CM009265.2 | 149922444 | 149922746 | HERVHF_5LTR | + |
| Pongo_abelii_CM009265.2 | 149924512 | 149924964 | HERVHF_gag  | + |
| Pongo_abelii_CM009265.2 | 149925311 | 149926060 | HERVHF_pro  | + |
| Pongo_abelii_CM009265.2 | 149925518 | 149927629 | HERVHF_pol  | + |
| Pongo_abelii_CM009265.2 | 149928157 | 149928470 | HERVHF_3LTR | + |
| Pongo_abelii_CM009265.2 | 150568454 | 150568879 | HERVHF_5LTR | - |
| Pongo_abelii_CM009265.2 | 150570132 | 150571960 | HERVHF_pol  | - |
| Pongo_abelii_CM009265.2 | 150571397 | 150572173 | HERVHF_pro  | - |
| Pongo_abelii_CM009265.2 | 150572226 | 150572546 | HERVHF_gag  | - |
| Pongo_abelii_CM009265.2 | 150574222 | 150574637 | HERVHF_3LTR | - |
| Pongo_abelii_CM009265.2 | 159126733 | 159127143 | HERVHF_5LTR | - |
| Pongo_abelii_CM009265.2 | 159127716 | 159129540 | HERVHF_pol  | - |
| Pongo_abelii_CM009265.2 | 159129961 | 159130290 | HERVHF_gag  | - |
| Pongo_abelii_CM009265.2 | 159132003 | 159132416 | HERVHF_3LTR | - |
| Pongo_abelii_CM009265.2 | 161366408 | 161366772 | HERVHF_5LTR | + |
| Pongo_abelii_CM009265.2 | 161368978 | 161369829 | HERVHF_pro  | + |
| Pongo_abelii_CM009265.2 | 161369266 | 161372078 | HERVHF_pol  | + |
| Pongo_abelii_CM009265.2 | 161372391 | 161372767 | HERVHF_3LTR | + |
| Pongo_abelii_CM009265.2 | 164031233 | 164031568 | HERVHF_5LTR | - |
| Pongo_abelii_CM009265.2 | 164031833 | 164034197 | HERVHF_pol  | - |
| Pongo_abelii_CM009265.2 | 164034598 | 164034909 | HERVHF_gag  | - |
| Pongo_abelii_CM009265.2 | 164036627 | 164036967 | HERVHF_3LTR | - |
| Pongo_abelii_CM009265.2 | 164965549 | 164965952 | HERVHF_5LTR | + |
| Pongo_abelii_CM009265.2 | 164967522 | 164967842 | HERVHF_gag  | + |
| Pongo_abelii_CM009265.2 | 164967894 | 164968658 | HERVHF_pro  | + |
| Pongo_abelii_CM009265.2 | 164968137 | 164970462 | HERVHF_pol  | + |
| Pongo_abelii_CM009265.2 | 164970870 | 164971273 | HERVHF_3LTR | + |
| Pongo_abelii_CM009265.2 | 168268014 | 168268452 | HERVHF_5LTR | - |
| Pongo_abelii_CM009265.2 | 168268785 | 168269738 | HERVHF_env  | - |
| Pongo_abelii_CM009265.2 | 168270546 | 168272524 | HERVHF_pol  | - |
| Pongo_abelii_CM009265.2 | 168272950 | 168273390 | HERVHF_gag  | - |
| Pongo_abelii_CM009265.2 | 168275169 | 168275606 | HERVHF_3LTR | - |
| Pongo_abelii_CM009265.2 | 170758375 | 170758792 | HERVHF_5LTR | - |
| Pongo_abelii_CM009265.2 | 170759462 | 170761785 | HERVHF_pol  | - |
| Pongo_abelii_CM009265.2 | 170761543 | 170762296 | HERVHF_pro  | - |
| Pongo_abelii_CM009265.2 | 170762401 | 170762709 | HERVHF_gag  | - |

|                         |           |           |             |   |
|-------------------------|-----------|-----------|-------------|---|
| Pongo_abelii_CM009265.2 | 170764327 | 170764749 | HERVHF_3LTR | - |
| Pongo_abelii_CM009265.2 | 177183147 | 177183557 | HERVHF_5LTR | + |
| Pongo_abelii_CM009265.2 | 177184971 | 177185369 | HERVHF_gag  | + |
| Pongo_abelii_CM009265.2 | 177185462 | 177185890 | HERVHF_pro  | + |
| Pongo_abelii_CM009265.2 | 177185614 | 177187563 | HERVHF_pol  | + |
| Pongo_abelii_CM009265.2 | 177188159 | 177188571 | HERVHF_3LTR | + |
| Pongo_abelii_CM009265.2 | 180408131 | 180408489 | HUERSP_5LTR | - |
| Pongo_abelii_CM009265.2 | 180414658 | 180415380 | HUERSP_pol  | - |
| Pongo_abelii_CM009265.2 | 180418703 | 180419062 | HUERSP_3LTR | - |
| Pongo_abelii_CM009265.2 | 184338932 | 184339333 | HERVHF_5LTR | + |
| Pongo_abelii_CM009265.2 | 184340913 | 184341479 | HERVHF_gag  | + |
| Pongo_abelii_CM009265.2 | 184341630 | 184342148 | HERVHF_pro  | + |
| Pongo_abelii_CM009265.2 | 184342052 | 184343602 | HERVHF_pol  | + |
| Pongo_abelii_CM009265.2 | 184344431 | 184344839 | HERVHF_3LTR | + |
| Pongo_abelii_CM009265.2 | 187825732 | 187826143 | HERVHF_5LTR | + |
| Pongo_abelii_CM009265.2 | 187827770 | 187828090 | HERVHF_gag  | + |
| Pongo_abelii_CM009265.2 | 187828437 | 187828853 | HERVHF_pro  | + |
| Pongo_abelii_CM009265.2 | 187828670 | 187830608 | HERVHF_pol  | + |
| Pongo_abelii_CM009265.2 | 187831004 | 187831414 | HERVHF_3LTR | + |
| Pongo_abelii_CM009265.2 | 189585797 | 189586109 | HERVHF_5LTR | - |
| Pongo_abelii_CM009265.2 | 189586796 | 189588739 | HERVHF_pol  | - |
| Pongo_abelii_CM009265.2 | 189589146 | 189589571 | HERVHF_gag  | - |
| Pongo_abelii_CM009265.2 | 189591152 | 189591456 | HERVHF_3LTR | - |
| Pongo_abelii_CM009265.2 | 189762877 | 189763222 | HERVHF_5LTR | - |
| Pongo_abelii_CM009265.2 | 189763701 | 189765779 | HERVHF_pol  | - |
| Pongo_abelii_CM009265.2 | 189765237 | 189766016 | HERVHF_pro  | - |
| Pongo_abelii_CM009265.2 | 189768502 | 189768859 | HERVHF_3LTR | - |
| Pongo_abelii_CM009265.2 | 190675039 | 190675454 | HERVHF_5LTR | + |
| Pongo_abelii_CM009265.2 | 190678073 | 190679859 | HERVHF_pol  | + |
| Pongo_abelii_CM009265.2 | 190680432 | 190680844 | HERVHF_3LTR | + |
| Pongo_abelii_CM009266.2 | 7215224   | 7215656   | HERVHF_5LTR | - |
| Pongo_abelii_CM009266.2 | 7215677   | 7216022   | HERVHF_env  | - |
| Pongo_abelii_CM009266.2 | 7216273   | 7218291   | HERVHF_pol  | - |
| Pongo_abelii_CM009266.2 | 7217656   | 7218483   | HERVHF_pro  | - |
| Pongo_abelii_CM009266.2 | 7218600   | 7218926   | HERVHF_gag  | - |
| Pongo_abelii_CM009266.2 | 7221194   | 7221630   | HERVHF_3LTR | - |
| Pongo_abelii_CM009266.2 | 10736407  | 10736811  | HERVHF_5LTR | - |
| Pongo_abelii_CM009266.2 | 10737401  | 10739416  | HERVHF_pol  | - |
| Pongo_abelii_CM009266.2 | 10741702  | 10742112  | HERVHF_3LTR | - |
| Pongo_abelii_CM009266.2 | 12735502  | 12735843  | HERVHF_5LTR | - |
| Pongo_abelii_CM009266.2 | 12736569  | 12738462  | HERVHF_pol  | - |
| Pongo_abelii_CM009266.2 | 12737950  | 12738501  | HERVHF_pro  | - |
| Pongo_abelii_CM009266.2 | 12738777  | 12739076  | HERVHF_gag  | - |
| Pongo_abelii_CM009266.2 | 12740975  | 12741312  | HERVHF_3LTR | - |

|                         |           |           |             |   |
|-------------------------|-----------|-----------|-------------|---|
| Pongo_abelii_CM009266.2 | 16134562  | 16135016  | HERVHF_5LTR | + |
| Pongo_abelii_CM009266.2 | 16136677  | 16136997  | HERVHF_gag  | + |
| Pongo_abelii_CM009266.2 | 16137420  | 16139350  | HERVHF_pol  | + |
| Pongo_abelii_CM009266.2 | 16140334  | 16140788  | HERVHF_3LTR | + |
| Pongo_abelii_CM009266.2 | 18089721  | 18090177  | HERVHF_5LTR | + |
| Pongo_abelii_CM009266.2 | 18092032  | 18092355  | HERVHF_gag  | + |
| Pongo_abelii_CM009266.2 | 18092504  | 18093301  | HERVHF_pro  | + |
| Pongo_abelii_CM009266.2 | 18092738  | 18094863  | HERVHF_pol  | + |
| Pongo_abelii_CM009266.2 | 18095268  | 18095721  | HERVHF_3LTR | + |
| Pongo_abelii_CM009266.2 | 26776833  | 26777284  | HERVHF_5LTR | - |
| Pongo_abelii_CM009266.2 | 26777876  | 26779815  | HERVHF_pol  | - |
| Pongo_abelii_CM009266.2 | 26779255  | 26779914  | HERVHF_pro  | - |
| Pongo_abelii_CM009266.2 | 26780127  | 26780426  | HERVHF_gag  | - |
| Pongo_abelii_CM009266.2 | 26782315  | 26782768  | HERVHF_3LTR | - |
| Pongo_abelii_CM009266.2 | 27318163  | 27318575  | HERVHF_5LTR | + |
| Pongo_abelii_CM009266.2 | 27320165  | 27320521  | HERVHF_gag  | + |
| Pongo_abelii_CM009266.2 | 27320767  | 27321366  | HERVHF_pro  | + |
| Pongo_abelii_CM009266.2 | 27320959  | 27323242  | HERVHF_pol  | + |
| Pongo_abelii_CM009266.2 | 27323661  | 27324072  | HERVHF_3LTR | + |
| Pongo_abelii_CM009266.2 | 69966562  | 69967015  | HERVHF_5LTR | + |
| Pongo_abelii_CM009266.2 | 69969375  | 69970124  | HERVHF_pro  | + |
| Pongo_abelii_CM009266.2 | 69969585  | 69971519  | HERVHF_pol  | + |
| Pongo_abelii_CM009266.2 | 69972105  | 69972563  | HERVHF_3LTR | + |
| Pongo_abelii_CM009266.2 | 84860878  | 84861341  | HERVHF_5LTR | + |
| Pongo_abelii_CM009266.2 | 84862791  | 84863192  | HERVHF_gag  | + |
| Pongo_abelii_CM009266.2 | 84863551  | 84865803  | HERVHF_pol  | + |
| Pongo_abelii_CM009266.2 | 84866219  | 84866678  | HERVHF_3LTR | + |
| Pongo_abelii_CM009266.2 | 88393712  | 88394117  | HERVHF_5LTR | - |
| Pongo_abelii_CM009266.2 | 88394518  | 88396502  | HERVHF_pol  | - |
| Pongo_abelii_CM009266.2 | 88398953  | 88399357  | HERVHF_3LTR | - |
| Pongo_abelii_CM009266.2 | 92853532  | 92853868  | HERVHF_5LTR | - |
| Pongo_abelii_CM009266.2 | 92854823  | 92856895  | HERVHF_pol  | - |
| Pongo_abelii_CM009266.2 | 92856473  | 92857006  | HERVHF_pro  | - |
| Pongo_abelii_CM009266.2 | 92857323  | 92857646  | HERVHF_gag  | - |
| Pongo_abelii_CM009266.2 | 92859472  | 92859825  | HERVHF_3LTR | - |
| Pongo_abelii_CM009266.2 | 107500687 | 107501087 | HERVHF_5LTR | + |
| Pongo_abelii_CM009266.2 | 107502633 | 107503139 | HERVHF_gag  | + |
| Pongo_abelii_CM009266.2 | 107503566 | 107504147 | HERVHF_pro  | + |
| Pongo_abelii_CM009266.2 | 107503740 | 107505906 | HERVHF_pol  | + |
| Pongo_abelii_CM009266.2 | 107506136 | 107506539 | HERVHF_3LTR | + |
| Pongo_abelii_CM009266.2 | 114896178 | 114896582 | HERVHF_5LTR | - |
| Pongo_abelii_CM009266.2 | 114897157 | 114898968 | HERVHF_pol  | - |
| Pongo_abelii_CM009266.2 | 114898573 | 114899289 | HERVHF_pro  | - |
| Pongo_abelii_CM009266.2 | 114899436 | 114899956 | HERVHF_gag  | - |

|                         |           |           |             |   |
|-------------------------|-----------|-----------|-------------|---|
| Pongo_abelii_CM009266.2 | 114901546 | 114901961 | HERVHF_3LTR | - |
| Pongo_abelii_CM009266.2 | 116229016 | 116229328 | HERVHF_5LTR | + |
| Pongo_abelii_CM009266.2 | 116231133 | 116231453 | HERVHF_gag  | + |
| Pongo_abelii_CM009266.2 | 116231883 | 116233681 | HERVHF_pol  | + |
| Pongo_abelii_CM009266.2 | 116234274 | 116234592 | HERVHF_3LTR | + |
| Pongo_abelii_CM009266.2 | 126100401 | 126100804 | HERVHF_5LTR | - |
| Pongo_abelii_CM009266.2 | 126101256 | 126103818 | HERVHF_pol  | - |
| Pongo_abelii_CM009266.2 | 126106157 | 126106561 | HERVHF_3LTR | - |
| Pongo_abelii_CM009266.2 | 129368859 | 129369262 | HERVHF_5LTR | + |
| Pongo_abelii_CM009266.2 | 129370689 | 129371000 | HERVHF_gag  | + |
| Pongo_abelii_CM009266.2 | 129371178 | 129371849 | HERVHF_pro  | + |
| Pongo_abelii_CM009266.2 | 129371250 | 129372807 | HERVHF_pol  | + |
| Pongo_abelii_CM009266.2 | 129374046 | 129374446 | HERVHF_3LTR | + |
| Pongo_abelii_CM009266.2 | 130771291 | 130771712 | HERVHF_5LTR | + |
| Pongo_abelii_CM009266.2 | 130773798 | 130774526 | HERVHF_pro  | + |
| Pongo_abelii_CM009266.2 | 130774146 | 130775653 | HERVHF_pol  | + |
| Pongo_abelii_CM009266.2 | 130776280 | 130776715 | HERVHF_3LTR | + |
| Pongo_abelii_CM009266.2 | 130784551 | 130784985 | HERVHF_5LTR | - |
| Pongo_abelii_CM009266.2 | 130785422 | 130787587 | HERVHF_pol  | - |
| Pongo_abelii_CM009266.2 | 130789829 | 130790269 | HERVHF_3LTR | - |
| Pongo_abelii_CM009266.2 | 132357455 | 132357901 | HERVHF_5LTR | - |
| Pongo_abelii_CM009266.2 | 132358295 | 132360154 | HERVHF_pol  | - |
| Pongo_abelii_CM009266.2 | 132362925 | 132363361 | HERVHF_3LTR | - |
| Pongo_abelii_CM009266.2 | 132734739 | 132735157 | HERVHF_5LTR | + |
| Pongo_abelii_CM009266.2 | 132736894 | 132737217 | HERVHF_gag  | + |
| Pongo_abelii_CM009266.2 | 132737305 | 132738054 | HERVHF_pro  | + |
| Pongo_abelii_CM009266.2 | 132737512 | 132739982 | HERVHF_pol  | + |
| Pongo_abelii_CM009266.2 | 132740552 | 132740964 | HERVHF_3LTR | + |
| Pongo_abelii_CM009266.2 | 133454189 | 133454601 | HERVHF_5LTR | - |
| Pongo_abelii_CM009266.2 | 133454996 | 133457125 | HERVHF_pol  | - |
| Pongo_abelii_CM009266.2 | 133456565 | 133457188 | HERVHF_pro  | - |
| Pongo_abelii_CM009266.2 | 133457454 | 133457828 | HERVHF_gag  | - |
| Pongo_abelii_CM009266.2 | 133459516 | 133459927 | HERVHF_3LTR | - |
| Pongo_abelii_CM009266.2 | 133967372 | 133967807 | HERVHF_5LTR | - |
| Pongo_abelii_CM009266.2 | 133968216 | 133970191 | HERVHF_pol  | - |
| Pongo_abelii_CM009266.2 | 133969823 | 133970428 | HERVHF_pro  | - |
| Pongo_abelii_CM009266.2 | 133972637 | 133973071 | HERVHF_3LTR | - |
| Pongo_abelii_CM009266.2 | 133993124 | 133993424 | HERVHF_5LTR | + |
| Pongo_abelii_CM009266.2 | 133995496 | 133995873 | HERVHF_pro  | + |
| Pongo_abelii_CM009266.2 | 133995893 | 133997890 | HERVHF_pol  | + |
| Pongo_abelii_CM009266.2 | 133998349 | 133998656 | HERVHF_3LTR | + |
| Pongo_abelii_CM009266.2 | 137846817 | 137847220 | HERVHF_5LTR | + |
| Pongo_abelii_CM009266.2 | 137848908 | 137849291 | HERVHF_gag  | + |
| Pongo_abelii_CM009266.2 | 137849327 | 137850157 | HERVHF_pro  | + |

|                         |           |           |             |   |
|-------------------------|-----------|-----------|-------------|---|
| Pongo_abelii_CM009266.2 | 137849615 | 137851501 | HERVHF_pol  | + |
| Pongo_abelii_CM009266.2 | 137852125 | 137852528 | HERVHF_3LTR | + |
| Pongo_abelii_CM009266.2 | 140584925 | 140585357 | HERVHF_5LTR | - |
| Pongo_abelii_CM009266.2 | 140585767 | 140587940 | HERVHF_pol  | - |
| Pongo_abelii_CM009266.2 | 140587323 | 140588087 | HERVHF_pro  | - |
| Pongo_abelii_CM009266.2 | 140590268 | 140590699 | HERVHF_3LTR | - |
| Pongo_abelii_CM009266.2 | 151598011 | 151598442 | HERVHF_5LTR | + |
| Pongo_abelii_CM009266.2 | 151600632 | 151601396 | HERVHF_pro  | + |
| Pongo_abelii_CM009266.2 | 151600818 | 151602802 | HERVHF_pol  | + |
| Pongo_abelii_CM009266.2 | 151603017 | 151604704 | HERVHF_env  | + |
| Pongo_abelii_CM009266.2 | 151604865 | 151605299 | HERVHF_3LTR | + |
| Pongo_abelii_CM009266.2 | 161870226 | 161870678 | HERVHF_5LTR | + |
| Pongo_abelii_CM009266.2 | 161872495 | 161872818 | HERVHF_gag  | + |
| Pongo_abelii_CM009266.2 | 161873247 | 161875122 | HERVHF_pol  | + |
| Pongo_abelii_CM009266.2 | 161875632 | 161876085 | HERVHF_3LTR | + |
| Pongo_abelii_CM009266.2 | 162055672 | 162056093 | HERVHF_5LTR | - |
| Pongo_abelii_CM009266.2 | 162056260 | 162056598 | HERVHF_env  | - |
| Pongo_abelii_CM009266.2 | 162057435 | 162059453 | HERVHF_pol  | - |
| Pongo_abelii_CM009266.2 | 162059607 | 162060035 | HERVHF_3LTR | - |
| Pongo_abelii_CM009266.2 | 165564750 | 165565154 | HERVHF_5LTR | + |
| Pongo_abelii_CM009266.2 | 165566645 | 165567001 | HERVHF_gag  | + |
| Pongo_abelii_CM009266.2 | 165567294 | 165569619 | HERVHF_pol  | + |
| Pongo_abelii_CM009266.2 | 165570025 | 165570425 | HERVHF_3LTR | + |
| Pongo_abelii_CM009266.2 | 165770442 | 165770892 | HERVHF_5LTR | - |
| Pongo_abelii_CM009266.2 | 165771426 | 165773312 | HERVHF_pol  | - |
| Pongo_abelii_CM009266.2 | 165773725 | 165774138 | HERVHF_gag  | - |
| Pongo_abelii_CM009266.2 | 165776232 | 165776681 | HERVHF_3LTR | - |
| Pongo_abelii_CM009266.2 | 166936186 | 166936585 | HERVHF_5LTR | + |
| Pongo_abelii_CM009266.2 | 166938032 | 166938535 | HERVHF_gag  | + |
| Pongo_abelii_CM009266.2 | 166939017 | 166941065 | HERVHF_pol  | + |
| Pongo_abelii_CM009266.2 | 166941496 | 166941897 | HERVHF_3LTR | + |
| Pongo_abelii_CM009266.2 | 166982199 | 166982668 | HERVHF_5LTR | + |
| Pongo_abelii_CM009266.2 | 166984260 | 166984640 | HERVHF_gag  | + |
| Pongo_abelii_CM009266.2 | 166984921 | 166985505 | HERVHF_pro  | + |
| Pongo_abelii_CM009266.2 | 166985098 | 166987095 | HERVHF_pol  | + |
| Pongo_abelii_CM009266.2 | 166987489 | 166987959 | HERVHF_3LTR | + |
| Pongo_abelii_CM009266.2 | 169289042 | 169289456 | HERVHF_5LTR | + |
| Pongo_abelii_CM009266.2 | 169291741 | 169293757 | HERVHF_pol  | + |
| Pongo_abelii_CM009266.2 | 169294266 | 169294683 | HERVHF_3LTR | + |
| Pongo_abelii_CM009266.2 | 170334983 | 170335462 | HERVHF_5LTR | + |
| Pongo_abelii_CM009266.2 | 170337333 | 170337656 | HERVHF_gag  | + |
| Pongo_abelii_CM009266.2 | 170337711 | 170338388 | HERVHF_pro  | + |
| Pongo_abelii_CM009266.2 | 170338258 | 170339859 | HERVHF_pol  | + |
| Pongo_abelii_CM009266.2 | 170340466 | 170340935 | HERVHF_3LTR | + |

|                         |           |           |             |   |
|-------------------------|-----------|-----------|-------------|---|
| Pongo_abelii_CM009266.2 | 170888032 | 170888490 | HERVHF_5LTR | - |
| Pongo_abelii_CM009266.2 | 170888880 | 170891090 | HERVHF_pol  | - |
| Pongo_abelii_CM009266.2 | 170890452 | 170891069 | HERVHF_pro  | - |
| Pongo_abelii_CM009266.2 | 170893531 | 170893981 | HERVHF_3LTR | - |
| Pongo_abelii_CM009266.2 | 171237974 | 171238363 | HERVHF_5LTR | - |
| Pongo_abelii_CM009266.2 | 171238956 | 171240874 | HERVHF_pol  | - |
| Pongo_abelii_CM009266.2 | 171241177 | 171241503 | HERVHF_gag  | - |
| Pongo_abelii_CM009266.2 | 171243178 | 171243576 | HERVHF_3LTR | - |
| Pongo_abelii_CM009266.2 | 172281866 | 172282186 | HERVHF_5LTR | - |
| Pongo_abelii_CM009266.2 | 172283015 | 172285353 | HERVHF_pol  | - |
| Pongo_abelii_CM009266.2 | 172284940 | 172285524 | HERVHF_pro  | - |
| Pongo_abelii_CM009266.2 | 172287916 | 172288217 | HERVHF_3LTR | - |
| Pongo_abelii_CM009266.2 | 174803879 | 174804330 | HERVHF_5LTR | - |
| Pongo_abelii_CM009266.2 | 174804786 | 174806747 | HERVHF_pol  | - |
| Pongo_abelii_CM009266.2 | 174806592 | 174807155 | HERVHF_pro  | - |
| Pongo_abelii_CM009266.2 | 174807438 | 174807818 | HERVHF_gag  | - |
| Pongo_abelii_CM009266.2 | 174809366 | 174809819 | HERVHF_3LTR | - |
| Pongo_abelii_CM009266.2 | 185436290 | 185436695 | HERVHF_5LTR | - |
| Pongo_abelii_CM009266.2 | 185437100 | 185439407 | HERVHF_pol  | - |
| Pongo_abelii_CM009266.2 | 185438844 | 185439695 | HERVHF_pro  | - |
| Pongo_abelii_CM009266.2 | 185439740 | 185440138 | HERVHF_gag  | - |
| Pongo_abelii_CM009266.2 | 185441506 | 185441910 | HERVHF_3LTR | - |
| Pongo_abelii_CM009266.2 | 188363554 | 188363883 | HERVHF_5LTR | - |
| Pongo_abelii_CM009266.2 | 188364664 | 188366365 | HERVHF_pol  | - |
| Pongo_abelii_CM009266.2 | 188366048 | 188366890 | HERVHF_pro  | - |
| Pongo_abelii_CM009266.2 | 188366883 | 188367278 | HERVHF_gag  | - |
| Pongo_abelii_CM009266.2 | 188368902 | 188369217 | HERVHF_3LTR | - |
| Pongo_abelii_CM009267.2 | 7223598   | 7223947   | HERVHF_5LTR | + |
| Pongo_abelii_CM009267.2 | 7225021   | 7227132   | HERVHF_pol  | + |
| Pongo_abelii_CM009267.2 | 7227585   | 7227939   | HERVHF_3LTR | + |
| Pongo_abelii_CM009267.2 | 9055806   | 9056479   | HERVHF_5LTR | - |
| Pongo_abelii_CM009267.2 | 9062461   | 9064786   | HERVHF_pol  | - |
| Pongo_abelii_CM009267.2 | 9064151   | 9064918   | HERVHF_pro  | - |
| Pongo_abelii_CM009267.2 | 9065080   | 9065523   | HERVHF_gag  | - |
| Pongo_abelii_CM009267.2 | 9066604   | 9067268   | HERVHF_3LTR | - |
| Pongo_abelii_CM009267.2 | 15032921  | 15033324  | HERVHF_5LTR | - |
| Pongo_abelii_CM009267.2 | 15033720  | 15035900  | HERVHF_pol  | - |
| Pongo_abelii_CM009267.2 | 15035292  | 15036113  | HERVHF_pro  | - |
| Pongo_abelii_CM009267.2 | 15037717  | 15038121  | HERVHF_3LTR | - |
| Pongo_abelii_CM009267.2 | 72614960  | 72615390  | HERVHF_5LTR | + |
| Pongo_abelii_CM009267.2 | 72623610  | 72624440  | HERVHF_pro  | + |
| Pongo_abelii_CM009267.2 | 72623802  | 72625943  | HERVHF_pol  | + |
| Pongo_abelii_CM009267.2 | 72626418  | 72626848  | HERVHF_3LTR | + |
| Pongo_abelii_CM009267.2 | 78332302  | 78332722  | HERVHF_5LTR | + |

|                         |           |           |             |   |
|-------------------------|-----------|-----------|-------------|---|
| Pongo_abelii_CM009267.2 | 78334365  | 78334736  | HERVHF_gag  | + |
| Pongo_abelii_CM009267.2 | 78335208  | 78337240  | HERVHF_pol  | + |
| Pongo_abelii_CM009267.2 | 78337829  | 78338254  | HERVHF_3LTR | + |
| Pongo_abelii_CM009267.2 | 100802925 | 100803308 | HERVHF_5LTR | + |
| Pongo_abelii_CM009267.2 | 100804912 | 100805307 | HERVHF_gag  | + |
| Pongo_abelii_CM009267.2 | 100805365 | 100806123 | HERVHF_pro  | + |
| Pongo_abelii_CM009267.2 | 100805506 | 100807735 | HERVHF_pol  | + |
| Pongo_abelii_CM009267.2 | 100808153 | 100808523 | HERVHF_3LTR | + |
| Pongo_abelii_CM009267.2 | 101667561 | 101667904 | HUERSP_5LTR | - |
| Pongo_abelii_CM009267.2 | 101677144 | 101679204 | HUERSP_pol  | - |
| Pongo_abelii_CM009267.2 | 101679612 | 101680037 | HUERSP_gag  | - |
| Pongo_abelii_CM009267.2 | 101682213 | 101682568 | HUERSP_3LTR | - |
| Pongo_abelii_CM009267.2 | 105399059 | 105399411 | HERVHF_5LTR | - |
| Pongo_abelii_CM009267.2 | 105399797 | 105400949 | HERVHF_pol  | - |
| Pongo_abelii_CM009267.2 | 105400696 | 105401271 | HERVHF_pro  | - |
| Pongo_abelii_CM009267.2 | 105401301 | 105401684 | HERVHF_gag  | - |
| Pongo_abelii_CM009267.2 | 105403500 | 105403846 | HERVHF_3LTR | - |
| Pongo_abelii_CM009267.2 | 110652445 | 110652956 | HERVK_5LTR  | + |
| Pongo_abelii_CM009267.2 | 110653694 | 110654635 | HERVK_pro   | + |
| Pongo_abelii_CM009267.2 | 110654530 | 110655369 | HERVK_pol   | + |
| Pongo_abelii_CM009267.2 | 110656642 | 110657142 | HERVK_3LTR  | + |
| Pongo_abelii_CM009267.2 | 114083675 | 114084111 | HERVHF_5LTR | - |
| Pongo_abelii_CM009267.2 | 114084752 | 114086403 | HERVHF_pol  | - |
| Pongo_abelii_CM009267.2 | 114086005 | 114086604 | HERVHF_pro  | - |
| Pongo_abelii_CM009267.2 | 114086917 | 114087243 | HERVHF_gag  | - |
| Pongo_abelii_CM009267.2 | 114088873 | 114089305 | HERVHF_3LTR | - |
| Pongo_abelii_CM009267.2 | 117782682 | 117783136 | HERVHF_5LTR | - |
| Pongo_abelii_CM009267.2 | 117783973 | 117785626 | HERVHF_pol  | - |
| Pongo_abelii_CM009267.2 | 117785138 | 117785962 | HERVHF_pro  | - |
| Pongo_abelii_CM009267.2 | 117785969 | 117786289 | HERVHF_gag  | - |
| Pongo_abelii_CM009267.2 | 117788261 | 117788714 | HERVHF_3LTR | - |
| Pongo_abelii_CM009267.2 | 117824580 | 117825034 | HERVHF_5LTR | - |
| Pongo_abelii_CM009267.2 | 117825810 | 117827667 | HERVHF_pol  | - |
| Pongo_abelii_CM009267.2 | 117827008 | 117827859 | HERVHF_pro  | - |
| Pongo_abelii_CM009267.2 | 117827869 | 117828186 | HERVHF_gag  | - |
| Pongo_abelii_CM009267.2 | 117830173 | 117830626 | HERVHF_3LTR | - |
| Pongo_abelii_CM009267.2 | 145205578 | 145206008 | HERVHF_5LTR | - |
| Pongo_abelii_CM009267.2 | 145206638 | 145208527 | HERVHF_pol  | - |
| Pongo_abelii_CM009267.2 | 145207964 | 145208818 | HERVHF_pro  | - |
| Pongo_abelii_CM009267.2 | 145210844 | 145211274 | HERVHF_3LTR | - |
| Pongo_abelii_CM009267.2 | 158869735 | 158870656 | HERVHF_5LTR | + |
| Pongo_abelii_CM009267.2 | 158875584 | 158876423 | HERVHF_pro  | + |
| Pongo_abelii_CM009267.2 | 158875794 | 158878173 | HERVHF_pol  | + |
| Pongo_abelii_CM009267.2 | 158878517 | 158879448 | HERVHF_3LTR | + |



|                         |           |           |                |   |
|-------------------------|-----------|-----------|----------------|---|
| Pongo_abelii_CM009267.2 | 159908796 | 159909207 | HERVHF_5LTR    | - |
| Pongo_abelii_CM009267.2 | 159909804 | 159911741 | HERVHF_pol     | - |
| Pongo_abelii_CM009267.2 | 159911220 | 159911978 | HERVHF_pro     | - |
| Pongo_abelii_CM009267.2 | 159912063 | 159912560 | HERVHF_gag     | - |
| Pongo_abelii_CM009267.2 | 159914126 | 159914529 | HERVHF_3LTR    | - |
| Pongo_abelii_CM009267.2 | 164445998 | 164446410 | HERVHF_5LTR    | - |
| Pongo_abelii_CM009267.2 | 164446420 | 164446829 | HERVHF_env     | - |
| Pongo_abelii_CM009267.2 | 164447031 | 164447884 | HERVHF_pol     | - |
| Pongo_abelii_CM009267.2 | 164448337 | 164448660 | HERVHF_gag     | - |
| Pongo_abelii_CM009267.2 | 164450237 | 164450646 | HERVHF_3LTR    | - |
| Pongo_abelii_CM009268.2 | 5878788   | 5879239   | HERVHF_5LTR    | + |
| Pongo_abelii_CM009268.2 | 5881663   | 5882232   | HERVHF_pro     | + |
| Pongo_abelii_CM009268.2 | 5882225   | 5883821   | HERVHF_pol     | + |
| Pongo_abelii_CM009268.2 | 5884412   | 5884865   | HERVHF_3LTR    | + |
| Pongo_abelii_CM009268.2 | 12525764  | 12526170  | HERVHF_5LTR    | + |
| Pongo_abelii_CM009268.2 | 12527567  | 12527914  | HERVHF_gag     | + |
| Pongo_abelii_CM009268.2 | 12528164  | 12528706  | HERVHF_pro     | + |
| Pongo_abelii_CM009268.2 | 12528586  | 12530531  | HERVHF_pol     | + |
| Pongo_abelii_CM009268.2 | 12530976  | 12531376  | HERVHF_3LTR    | + |
| Pongo_abelii_CM009268.2 | 16768448  | 16768850  | HERVHF_5LTR    | + |
| Pongo_abelii_CM009268.2 | 16771024  | 16771740  | HERVHF_pro     | + |
| Pongo_abelii_CM009268.2 | 16771105  | 16773198  | HERVHF_pol     | + |
| Pongo_abelii_CM009268.2 | 16773732  | 16774134  | HERVHF_3LTR    | + |
| Pongo_abelii_CM009268.2 | 31453916  | 31454291  | HERVIPADP_5LTR | - |
| Pongo_abelii_CM009268.2 | 31455521  | 31455865  | HERVIPADP_env  | - |
| Pongo_abelii_CM009268.2 | 31458701  | 31460242  | HERVIPADP_pol  | - |
| Pongo_abelii_CM009268.2 | 31460574  | 31462913  | HERVIPADP_gag  | - |
| Pongo_abelii_CM009268.2 | 31464449  | 31464828  | HERVIPADP_3LTR | - |
| Pongo_abelii_CM009268.2 | 52421278  | 52421725  | HERVHF_5LTR    | + |
| Pongo_abelii_CM009268.2 | 52423595  | 52423930  | HERVHF_pro     | + |
| Pongo_abelii_CM009268.2 | 52424031  | 52426206  | HERVHF_pol     | + |
| Pongo_abelii_CM009268.2 | 52426613  | 52427066  | HERVHF_3LTR    | + |
| Pongo_abelii_CM009268.2 | 58809699  | 58810143  | HERVHF_5LTR    | + |
| Pongo_abelii_CM009268.2 | 58811771  | 58812094  | HERVHF_gag     | + |
| Pongo_abelii_CM009268.2 | 58812101  | 58812910  | HERVHF_pro     | + |
| Pongo_abelii_CM009268.2 | 58812431  | 58814422  | HERVHF_pol     | + |
| Pongo_abelii_CM009268.2 | 58815360  | 58815805  | HERVHF_3LTR    | + |
| Pongo_abelii_CM009268.2 | 65380141  | 65380529  | HERVHF_5LTR    | + |
| Pongo_abelii_CM009268.2 | 65381829  | 65382308  | HERVHF_gag     | + |
| Pongo_abelii_CM009268.2 | 65382361  | 65383119  | HERVHF_pro     | + |
| Pongo_abelii_CM009268.2 | 65382502  | 65384747  | HERVHF_pol     | + |
| Pongo_abelii_CM009268.2 | 65385294  | 65385692  | HERVHF_3LTR    | + |
| Pongo_abelii_CM009268.2 | 93530311  | 93530753  | HERVHF_5LTR    | + |
| Pongo_abelii_CM009268.2 | 93532540  | 93532863  | HERVHF_gag     | + |

|                         |           |           |             |   |
|-------------------------|-----------|-----------|-------------|---|
| Pongo_abelii_CM009268.2 | 93533386  | 93535182  | HERVHF_pol  | + |
| Pongo_abelii_CM009268.2 | 93535787  | 93536239  | HERVHF_3LTR | + |
| Pongo_abelii_CM009268.2 | 112584315 | 112584740 | HERVHF_5LTR | - |
| Pongo_abelii_CM009268.2 | 112585303 | 112587081 | HERVHF_pol  | - |
| Pongo_abelii_CM009268.2 | 112586764 | 112587534 | HERVHF_pro  | - |
| Pongo_abelii_CM009268.2 | 112587619 | 112587990 | HERVHF_gag  | - |
| Pongo_abelii_CM009268.2 | 112589676 | 112590086 | HERVHF_3LTR | - |
| Pongo_abelii_CM009268.2 | 121897573 | 121897887 | HERVHF_5LTR | - |
| Pongo_abelii_CM009268.2 | 121898477 | 121900411 | HERVHF_pol  | - |
| Pongo_abelii_CM009268.2 | 121902793 | 121903100 | HERVHF_3LTR | - |
| Pongo_abelii_CM009268.2 | 129868978 | 129869412 | HERVHF_5LTR | + |
| Pongo_abelii_CM009268.2 | 129871029 | 129871355 | HERVHF_gag  | + |
| Pongo_abelii_CM009268.2 | 129871741 | 129873841 | HERVHF_pol  | + |
| Pongo_abelii_CM009268.2 | 129874250 | 129874681 | HERVHF_3LTR | + |
| Pongo_abelii_CM009268.2 | 130124072 | 130124505 | HERVHF_5LTR | + |
| Pongo_abelii_CM009268.2 | 130126232 | 130126540 | HERVHF_gag  | + |
| Pongo_abelii_CM009268.2 | 130126666 | 130127253 | HERVHF_pro  | + |
| Pongo_abelii_CM009268.2 | 130127124 | 130128998 | HERVHF_pol  | + |
| Pongo_abelii_CM009268.2 | 130129402 | 130129833 | HERVHF_3LTR | + |
| Pongo_abelii_CM009268.2 | 130355375 | 130355829 | HERVHF_5LTR | + |
| Pongo_abelii_CM009268.2 | 130357349 | 130357663 | HERVHF_gag  | + |
| Pongo_abelii_CM009268.2 | 130357439 | 130358590 | HERVHF_pro  | + |
| Pongo_abelii_CM009268.2 | 130358222 | 130360336 | HERVHF_pol  | + |
| Pongo_abelii_CM009268.2 | 130361126 | 130361580 | HERVHF_3LTR | + |
| Pongo_abelii_CM009268.2 | 139999496 | 139999900 | HERVHF_5LTR | + |
| Pongo_abelii_CM009268.2 | 140001622 | 140001942 | HERVHF_gag  | + |
| Pongo_abelii_CM009268.2 | 140002023 | 140002751 | HERVHF_pro  | + |
| Pongo_abelii_CM009268.2 | 140002146 | 140004717 | HERVHF_pol  | + |
| Pongo_abelii_CM009268.2 | 140005943 | 140006706 | HERVHF_env  | + |
| Pongo_abelii_CM009268.2 | 140006933 | 140007335 | HERVHF_3LTR | + |
| Pongo_abelii_CM009268.2 | 143456405 | 143456849 | HERVHF_5LTR | + |
| Pongo_abelii_CM009268.2 | 143459078 | 143459650 | HERVHF_pro  | + |
| Pongo_abelii_CM009268.2 | 143459243 | 143461000 | HERVHF_pol  | + |
| Pongo_abelii_CM009268.2 | 143461583 | 143462032 | HERVHF_3LTR | + |
| Pongo_abelii_CM009268.2 | 143546012 | 143546456 | HERVHF_5LTR | - |
| Pongo_abelii_CM009268.2 | 143546857 | 143548955 | HERVHF_pol  | - |
| Pongo_abelii_CM009268.2 | 143548416 | 143549243 | HERVHF_pro  | - |
| Pongo_abelii_CM009268.2 | 143549250 | 143549570 | HERVHF_gag  | - |
| Pongo_abelii_CM009268.2 | 143550885 | 143551344 | HERVHF_3LTR | - |
| Pongo_abelii_CM009268.2 | 147199349 | 147199655 | HERVHF_5LTR | + |
| Pongo_abelii_CM009268.2 | 147201419 | 147201751 | HERVHF_gag  | + |
| Pongo_abelii_CM009268.2 | 147201908 | 147202636 | HERVHF_pro  | + |
| Pongo_abelii_CM009268.2 | 147202256 | 147204107 | HERVHF_pol  | + |
| Pongo_abelii_CM009268.2 | 147204653 | 147204967 | HERVHF_3LTR | + |

|                         |           |           |             |   |
|-------------------------|-----------|-----------|-------------|---|
| Pongo_abelii_CM009268.2 | 152586931 | 152587357 | HERVHF_5LTR | + |
| Pongo_abelii_CM009268.2 | 152588987 | 152589310 | HERVHF_gag  | + |
| Pongo_abelii_CM009268.2 | 152589314 | 152590126 | HERVHF_pro  | + |
| Pongo_abelii_CM009268.2 | 152589509 | 152591689 | HERVHF_pol  | + |
| Pongo_abelii_CM009268.2 | 152592127 | 152592548 | HERVHF_3LTR | + |
| Pongo_abelii_CM009268.2 | 159002207 | 159002561 | HERVHF_5LTR | - |
| Pongo_abelii_CM009268.2 | 159003014 | 159005114 | HERVHF_pol  | - |
| Pongo_abelii_CM009268.2 | 159005448 | 159005870 | HERVHF_gag  | - |
| Pongo_abelii_CM009268.2 | 159007532 | 159007891 | HERVHF_3LTR | - |
| Pongo_abelii_CM009268.2 | 163203469 | 163203883 | HERVHF_5LTR | - |
| Pongo_abelii_CM009268.2 | 163204659 | 163206326 | HERVHF_pol  | - |
| Pongo_abelii_CM009268.2 | 163206775 | 163207161 | HERVHF_gag  | - |
| Pongo_abelii_CM009268.2 | 163208935 | 163209367 | HERVHF_3LTR | - |
| Pongo_abelii_CM009268.2 | 163522980 | 163523296 | HERVHF_5LTR | - |
| Pongo_abelii_CM009268.2 | 163523871 | 163525972 | HERVHF_pol  | - |
| Pongo_abelii_CM009268.2 | 163525355 | 163526107 | HERVHF_pro  | - |
| Pongo_abelii_CM009268.2 | 163526164 | 163526493 | HERVHF_gag  | - |
| Pongo_abelii_CM009268.2 | 163528368 | 163528686 | HERVHF_3LTR | - |
| Pongo_abelii_CM009269.2 | 22939485  | 22939934  | HERVHF_5LTR | - |
| Pongo_abelii_CM009269.2 | 22940330  | 22942437  | HERVHF_pol  | - |
| Pongo_abelii_CM009269.2 | 22942763  | 22943086  | HERVHF_gag  | - |
| Pongo_abelii_CM009269.2 | 22944822  | 22945275  | HERVHF_3LTR | - |
| Pongo_abelii_CM009269.2 | 41868789  | 41869195  | HERVHF_5LTR | + |
| Pongo_abelii_CM009269.2 | 41870360  | 41870884  | HERVHF_gag  | + |
| Pongo_abelii_CM009269.2 | 41871336  | 41873546  | HERVHF_pol  | + |
| Pongo_abelii_CM009269.2 | 41873999  | 41874402  | HERVHF_3LTR | + |
| Pongo_abelii_CM009269.2 | 49136885  | 49137324  | HERVHF_5LTR | - |
| Pongo_abelii_CM009269.2 | 49137770  | 49139618  | HERVHF_pol  | - |
| Pongo_abelii_CM009269.2 | 49139545  | 49140075  | HERVHF_pro  | - |
| Pongo_abelii_CM009269.2 | 49142107  | 49142546  | HERVHF_3LTR | - |
| Pongo_abelii_CM009269.2 | 60853813  | 60854253  | HERVHF_5LTR | + |
| Pongo_abelii_CM009269.2 | 60856081  | 60856467  | HERVHF_gag  | + |
| Pongo_abelii_CM009269.2 | 60856733  | 60858862  | HERVHF_pol  | + |
| Pongo_abelii_CM009269.2 | 60859315  | 60859756  | HERVHF_3LTR | + |
| Pongo_abelii_CM009269.2 | 71369924  | 71370347  | HERVHF_5LTR | - |
| Pongo_abelii_CM009269.2 | 71370364  | 71370718  | HERVHF_env  | - |
| Pongo_abelii_CM009269.2 | 71372137  | 71372718  | HERVHF_pol  | - |
| Pongo_abelii_CM009269.2 | 71372341  | 71372892  | HERVHF_pro  | - |
| Pongo_abelii_CM009269.2 | 71373174  | 71373554  | HERVHF_gag  | - |
| Pongo_abelii_CM009269.2 | 71375211  | 71375620  | HERVHF_3LTR | - |
| Pongo_abelii_CM009269.2 | 76349932  | 76350315  | HUERSP_5LTR | + |
| Pongo_abelii_CM009269.2 | 76352534  | 76353232  | HUERSP_gag  | + |
| Pongo_abelii_CM009269.2 | 76353935  | 76356185  | HUERSP_pol  | + |
| Pongo_abelii_CM009269.2 | 76357734  | 76358117  | HUERSP_3LTR | + |

|                         |           |           |             |   |
|-------------------------|-----------|-----------|-------------|---|
| Pongo_abelii_CM009269.2 | 81495448  | 81495901  | HERVHF_5LTR | - |
| Pongo_abelii_CM009269.2 | 81496473  | 81498278  | HERVHF_pol  | - |
| Pongo_abelii_CM009269.2 | 81497871  | 81498632  | HERVHF_pro  | - |
| Pongo_abelii_CM009269.2 | 81498706  | 81499032  | HERVHF_gag  | - |
| Pongo_abelii_CM009269.2 | 81500897  | 81501350  | HERVHF_3LTR | - |
| Pongo_abelii_CM009269.2 | 91932807  | 91933269  | HERVHF_5LTR | - |
| Pongo_abelii_CM009269.2 | 91933437  | 91933998  | HERVHF_env  | - |
| Pongo_abelii_CM009269.2 | 91934151  | 91936500  | HERVHF_pol  | - |
| Pongo_abelii_CM009269.2 | 91935949  | 91936734  | HERVHF_pro  | - |
| Pongo_abelii_CM009269.2 | 91936816  | 91937169  | HERVHF_gag  | - |
| Pongo_abelii_CM009269.2 | 91938265  | 91938726  | HERVHF_3LTR | - |
| Pongo_abelii_CM009269.2 | 95095256  | 95095590  | HERVHF_5LTR | - |
| Pongo_abelii_CM009269.2 | 95095957  | 95098502  | HERVHF_pol  | - |
| Pongo_abelii_CM009269.2 | 95097921  | 95098733  | HERVHF_pro  | - |
| Pongo_abelii_CM009269.2 | 95098815  | 95099186  | HERVHF_gag  | - |
| Pongo_abelii_CM009269.2 | 95100613  | 95100946  | HERVHF_3LTR | - |
| Pongo_abelii_CM009269.2 | 104542453 | 104542862 | HERVHF_5LTR | - |
| Pongo_abelii_CM009269.2 | 104543271 | 104545244 | HERVHF_pol  | - |
| Pongo_abelii_CM009269.2 | 104545784 | 104546083 | HERVHF_gag  | - |
| Pongo_abelii_CM009269.2 | 104547631 | 104548038 | HERVHF_3LTR | - |
| Pongo_abelii_CM009269.2 | 105873096 | 105873478 | HERVHF_5LTR | + |
| Pongo_abelii_CM009269.2 | 105874851 | 105875213 | HERVHF_gag  | + |
| Pongo_abelii_CM009269.2 | 105875333 | 105876121 | HERVHF_pro  | + |
| Pongo_abelii_CM009269.2 | 105875579 | 105877866 | HERVHF_pol  | + |
| Pongo_abelii_CM009269.2 | 105878307 | 105878677 | HERVHF_3LTR | + |
| Pongo_abelii_CM009269.2 | 106653506 | 106653910 | HERVHF_5LTR | - |
| Pongo_abelii_CM009269.2 | 106654926 | 106656985 | HERVHF_pol  | - |
| Pongo_abelii_CM009269.2 | 106656272 | 106657276 | HERVHF_pro  | - |
| Pongo_abelii_CM009269.2 | 106657280 | 106657609 | HERVHF_gag  | - |
| Pongo_abelii_CM009269.2 | 106659341 | 106659746 | HERVHF_3LTR | - |
| Pongo_abelii_CM009270.2 | 678349    | 678761    | HERVHF_5LTR | - |
| Pongo_abelii_CM009270.2 | 679161    | 681290    | HERVHF_pol  | - |
| Pongo_abelii_CM009270.2 | 681694    | 682128    | HERVHF_gag  | - |
| Pongo_abelii_CM009270.2 | 683551    | 683960    | HERVHF_3LTR | - |
| Pongo_abelii_CM009270.2 | 9099254   | 9099670   | HERVHF_5LTR | - |
| Pongo_abelii_CM009270.2 | 9100731   | 9102305   | HERVHF_pol  | - |
| Pongo_abelii_CM009270.2 | 9101901   | 9102731   | HERVHF_pro  | - |
| Pongo_abelii_CM009270.2 | 9102765   | 9103304   | HERVHF_gag  | - |
| Pongo_abelii_CM009270.2 | 9104886   | 9105318   | HERVHF_3LTR | - |
| Pongo_abelii_CM009270.2 | 46592912  | 46593330  | HERVHF_5LTR | + |
| Pongo_abelii_CM009270.2 | 46594702  | 46595052  | HERVHF_gag  | + |
| Pongo_abelii_CM009270.2 | 46595645  | 46597621  | HERVHF_pol  | + |
| Pongo_abelii_CM009270.2 | 46598590  | 46599021  | HERVHF_env  | + |
| Pongo_abelii_CM009270.2 | 46599143  | 46599550  | HERVHF_3LTR | + |

|                         |           |           |             |   |
|-------------------------|-----------|-----------|-------------|---|
| Pongo_abelii_CM009270.2 | 57769102  | 57769528  | HERVHF_5LTR | - |
| Pongo_abelii_CM009270.2 | 57769804  | 57770121  | HERVHF_env  | - |
| Pongo_abelii_CM009270.2 | 57771076  | 57773246  | HERVHF_pol  | - |
| Pongo_abelii_CM009270.2 | 57772521  | 57773408  | HERVHF_pro  | - |
| Pongo_abelii_CM009270.2 | 57775315  | 57775747  | HERVHF_3LTR | - |
| Pongo_abelii_CM009270.2 | 63427139  | 63427528  | HERVHF_5LTR | + |
| Pongo_abelii_CM009270.2 | 63428754  | 63429677  | HERVHF_gag  | + |
| Pongo_abelii_CM009270.2 | 63430144  | 63432441  | HERVHF_pol  | + |
| Pongo_abelii_CM009270.2 | 63433224  | 63433775  | HERVHF_env  | + |
| Pongo_abelii_CM009270.2 | 63433979  | 63434364  | HERVHF_3LTR | + |
| Pongo_abelii_CM009270.2 | 79743080  | 79743407  | HERVHF_5LTR | - |
| Pongo_abelii_CM009270.2 | 79744377  | 79746570  | HERVHF_pol  | - |
| Pongo_abelii_CM009270.2 | 79746109  | 79746807  | HERVHF_pro  | - |
| Pongo_abelii_CM009270.2 | 79746860  | 79747189  | HERVHF_gag  | - |
| Pongo_abelii_CM009270.2 | 79748637  | 79748974  | HERVHF_3LTR | - |
| Pongo_abelii_CM009270.2 | 127090804 | 127091190 | HERVHF_5LTR | - |
| Pongo_abelii_CM009270.2 | 127091654 | 127093619 | HERVHF_pol  | - |
| Pongo_abelii_CM009270.2 | 127093080 | 127093907 | HERVHF_pro  | - |
| Pongo_abelii_CM009270.2 | 127094006 | 127094323 | HERVHF_gag  | - |
| Pongo_abelii_CM009270.2 | 127095947 | 127096331 | HERVHF_3LTR | - |
| Pongo_abelii_CM009270.2 | 127485811 | 127486172 | HERVHF_5LTR | + |
| Pongo_abelii_CM009270.2 | 127486759 | 127487154 | HERVHF_gag  | + |
| Pongo_abelii_CM009270.2 | 127487629 | 127489819 | HERVHF_pol  | + |
| Pongo_abelii_CM009270.2 | 127496471 | 127496842 | HERVHF_3LTR | + |
| Pongo_abelii_CM009270.2 | 136504079 | 136504487 | HERVHF_5LTR | - |
| Pongo_abelii_CM009270.2 | 136504943 | 136507308 | HERVHF_pol  | - |
| Pongo_abelii_CM009270.2 | 136506766 | 136507569 | HERVHF_pro  | - |
| Pongo_abelii_CM009270.2 | 136507603 | 136508040 | HERVHF_gag  | - |
| Pongo_abelii_CM009270.2 | 136509612 | 136510002 | HERVHF_3LTR | - |
| Pongo_abelii_CM009271.2 | 17952713  | 17953116  | HERVHF_5LTR | + |
| Pongo_abelii_CM009271.2 | 17955263  | 17957646  | HERVHF_pol  | + |
| Pongo_abelii_CM009271.2 | 17955263  | 17955814  | HERVHF_pro  | + |
| Pongo_abelii_CM009271.2 | 17958053  | 17958458  | HERVHF_3LTR | + |
| Pongo_abelii_CM009271.2 | 48306384  | 48306705  | HERVHF_5LTR | - |
| Pongo_abelii_CM009271.2 | 48306938  | 48307750  | HERVHF_env  | - |
| Pongo_abelii_CM009271.2 | 48308612  | 48309760  | HERVHF_pol  | - |
| Pongo_abelii_CM009271.2 | 48309353  | 48309883  | HERVHF_pro  | - |
| Pongo_abelii_CM009271.2 | 48310181  | 48310504  | HERVHF_gag  | - |
| Pongo_abelii_CM009271.2 | 48312285  | 48312597  | HERVHF_3LTR | - |
| Pongo_abelii_CM009271.2 | 49516710  | 49517163  | HERVHF_5LTR | - |
| Pongo_abelii_CM009271.2 | 49517552  | 49519642  | HERVHF_pol  | - |
| Pongo_abelii_CM009271.2 | 49519540  | 49520130  | HERVHF_pro  | - |
| Pongo_abelii_CM009271.2 | 49521897  | 49522350  | HERVHF_3LTR | - |
| Pongo_abelii_CM009271.2 | 57373562  | 57373885  | HERVHF_5LTR | - |

|                         |                     |             |   |
|-------------------------|---------------------|-------------|---|
| Pongo_abelii_CM009271.2 | 57374658 57376499   | HERVHF_pol  | - |
| Pongo_abelii_CM009271.2 | 57377024 57377507   | HERVHF_gag  | - |
| Pongo_abelii_CM009271.2 | 57378763 57379087   | HERVHF_3LTR | - |
| Pongo_abelii_CM009271.2 | 63274812 63275275   | HERVHF_5LTR | - |
| Pongo_abelii_CM009271.2 | 63276496 63277891   | HERVHF_pol  | - |
| Pongo_abelii_CM009271.2 | 63278138 63278485   | HERVHF_gag  | - |
| Pongo_abelii_CM009271.2 | 63280377 63280832   | HERVHF_3LTR | - |
| Pongo_abelii_CM009271.2 | 67296955 67297463   | HERVK_5LTR  | - |
| Pongo_abelii_CM009271.2 | 67297546 67298273   | HERVK_env   | - |
| Pongo_abelii_CM009271.2 | 67298392 67299458   | HERVK_pol   | - |
| Pongo_abelii_CM009271.2 | 67299400 67300319   | HERVK_pro   | - |
| Pongo_abelii_CM009271.2 | 67301180 67301693   | HERVK_3LTR  | - |
| Pongo_abelii_CM009271.2 | 71924930 71925910   | HERVHF_5LTR | - |
| Pongo_abelii_CM009271.2 | 71925918 71927208   | HERVHF_pol  | - |
| Pongo_abelii_CM009271.2 | 71927625 71928062   | HERVHF_gag  | - |
| Pongo_abelii_CM009271.2 | 71932996 71933994   | HERVHF_3LTR | - |
| Pongo_abelii_CM009271.2 | 92434354 92434833   | HERVK_5LTR  | - |
| Pongo_abelii_CM009271.2 | 92434883 92435245   | HERVK_env   | - |
| Pongo_abelii_CM009271.2 | 92435938 92437060   | HERVK_pol   | - |
| Pongo_abelii_CM009271.2 | 92436955 92437893   | HERVK_pro   | - |
| Pongo_abelii_CM009271.2 | 92438758 92439230   | HERVK_3LTR  | - |
| Pongo_abelii_CM009271.2 | 100985097 100985548 | HERVHF_5LTR | - |
| Pongo_abelii_CM009271.2 | 100986002 100988082 | HERVHF_pol  | - |
| Pongo_abelii_CM009271.2 | 100987540 100988370 | HERVHF_pro  | - |
| Pongo_abelii_CM009271.2 | 100988377 100988697 | HERVHF_gag  | - |
| Pongo_abelii_CM009271.2 | 100990741 100991193 | HERVHF_3LTR | - |
| Pongo_abelii_CM009272.2 | 6492718 6493171     | HERVHF_5LTR | - |
| Pongo_abelii_CM009272.2 | 6493570 6495553     | HERVHF_pol  | - |
| Pongo_abelii_CM009272.2 | 6496024 6496515     | HERVHF_gag  | - |
| Pongo_abelii_CM009272.2 | 6497993 6498450     | HERVHF_3LTR | - |
| Pongo_abelii_CM009272.2 | 20245221 20245630   | HERVHF_5LTR | - |
| Pongo_abelii_CM009272.2 | 20246031 20248014   | HERVHF_pol  | - |
| Pongo_abelii_CM009272.2 | 20247607 20248191   | HERVHF_pro  | - |
| Pongo_abelii_CM009272.2 | 20250548 20250954   | HERVHF_3LTR | - |
| Pongo_abelii_CM009272.2 | 85259613 85260044   | HERVHF_5LTR | + |
| Pongo_abelii_CM009272.2 | 85261765 85262088   | HERVHF_gag  | + |
| Pongo_abelii_CM009272.2 | 85262205 85262987   | HERVHF_pro  | + |
| Pongo_abelii_CM009272.2 | 85262370 85264569   | HERVHF_pol  | + |
| Pongo_abelii_CM009272.2 | 85264979 85265410   | HERVHF_3LTR | + |
| Pongo_abelii_CM009272.2 | 87427659 87428051   | HERVHF_5LTR | + |
| Pongo_abelii_CM009272.2 | 87429568 87430302   | HERVHF_gag  | + |
| Pongo_abelii_CM009272.2 | 87430198 87431085   | HERVHF_pro  | + |
| Pongo_abelii_CM009272.2 | 87430827 87432257   | HERVHF_pol  | + |
| Pongo_abelii_CM009272.2 | 87432933 87433298   | HERVHF_env  | + |

|                         |           |           |                |   |
|-------------------------|-----------|-----------|----------------|---|
| Pongo_abelii_CM009272.2 | 87433430  | 87433831  | HERVHF_3LTR    | + |
| Pongo_abelii_CM009272.2 | 93320764  | 93321199  | HERVHF_5LTR    | + |
| Pongo_abelii_CM009272.2 | 93323988  | 93325109  | HERVHF_pro     | + |
| Pongo_abelii_CM009272.2 | 93324573  | 93326705  | HERVHF_pol     | + |
| Pongo_abelii_CM009272.2 | 93327102  | 93327533  | HERVHF_3LTR    | + |
| Pongo_abelii_CM009272.2 | 103239701 | 103240154 | HERVHF_5LTR    | - |
| Pongo_abelii_CM009272.2 | 103240731 | 103242516 | HERVHF_pol     | - |
| Pongo_abelii_CM009272.2 | 103242148 | 103242927 | HERVHF_pro     | - |
| Pongo_abelii_CM009272.2 | 103242968 | 103243489 | HERVHF_gag     | - |
| Pongo_abelii_CM009272.2 | 103245063 | 103245514 | HERVHF_3LTR    | - |
| Pongo_abelii_CM009272.2 | 104383652 | 104384097 | HERVHF_5LTR    | - |
| Pongo_abelii_CM009272.2 | 104384340 | 104385141 | HERVHF_env     | - |
| Pongo_abelii_CM009272.2 | 104384764 | 104387575 | HERVHF_pol     | - |
| Pongo_abelii_CM009272.2 | 104387790 | 104388200 | HERVHF_gag     | - |
| Pongo_abelii_CM009272.2 | 104389553 | 104389999 | HERVHF_3LTR    | - |
| Pongo_abelii_CM009273.2 | 4287257   | 4287673   | HERVHF_5LTR    | + |
| Pongo_abelii_CM009273.2 | 4290035   | 4292242   | HERVHF_pol     | + |
| Pongo_abelii_CM009273.2 | 4292939   | 4293356   | HERVHF_3LTR    | + |
| Pongo_abelii_CM009273.2 | 44038119  | 44038587  | HERVIPADP_5LTR | + |
| Pongo_abelii_CM009273.2 | 44040092  | 44040502  | HERVIPADP_gag  | + |
| Pongo_abelii_CM009273.2 | 44040733  | 44042818  | HERVIPADP_pol  | + |
| Pongo_abelii_CM009273.2 | 44044585  | 44045444  | HERVIPADP_env  | + |
| Pongo_abelii_CM009273.2 | 44045737  | 44046192  | HERVIPADP_3LTR | + |
| Pongo_abelii_CM009273.2 | 48408898  | 48409271  | HERVHF_5LTR    | - |
| Pongo_abelii_CM009273.2 | 48409506  | 48409868  | HERVHF_env     | - |
| Pongo_abelii_CM009273.2 | 48409957  | 48412595  | HERVHF_pol     | - |
| Pongo_abelii_CM009273.2 | 48412134  | 48412832  | HERVHF_pro     | - |
| Pongo_abelii_CM009273.2 | 48412890  | 48413213  | HERVHF_gag     | - |
| Pongo_abelii_CM009273.2 | 48414719  | 48415084  | HERVHF_3LTR    | - |
| Pongo_abelii_CM009273.2 | 61970785  | 61971146  | HERVHF_5LTR    | + |
| Pongo_abelii_CM009273.2 | 61973712  | 61975654  | HERVHF_pol     | + |
| Pongo_abelii_CM009273.2 | 61976102  | 61976465  | HERVHF_3LTR    | + |
| Pongo_abelii_CM009273.2 | 62100150  | 62100478  | HERVHF_5LTR    | - |
| Pongo_abelii_CM009273.2 | 62101021  | 62102813  | HERVHF_pol     | - |
| Pongo_abelii_CM009273.2 | 62102520  | 62103299  | HERVHF_pro     | - |
| Pongo_abelii_CM009273.2 | 62103362  | 62103877  | HERVHF_gag     | - |
| Pongo_abelii_CM009273.2 | 62105447  | 62105771  | HERVHF_3LTR    | - |
| Pongo_abelii_CM009273.2 | 63825876  | 63826303  | HERVHF_5LTR    | - |
| Pongo_abelii_CM009273.2 | 63826735  | 63828744  | HERVHF_pol     | - |
| Pongo_abelii_CM009273.2 | 63829081  | 63829491  | HERVHF_gag     | - |
| Pongo_abelii_CM009273.2 | 63831189  | 63831618  | HERVHF_3LTR    | - |
| Pongo_abelii_CM009273.2 | 74108403  | 74108853  | HERVHF_5LTR    | + |
| Pongo_abelii_CM009273.2 | 74110354  | 74110665  | HERVHF_gag     | + |
| Pongo_abelii_CM009273.2 | 74111120  | 74112319  | HERVHF_pol     | + |

|                         |           |           |             |   |
|-------------------------|-----------|-----------|-------------|---|
| Pongo_abelii_CM009273.2 | 74113557  | 74114011  | HERVHF_3LTR | + |
| Pongo_abelii_CM009273.2 | 75556682  | 75557137  | HERVHF_5LTR | - |
| Pongo_abelii_CM009273.2 | 75558213  | 75560449  | HERVHF_pol  | - |
| Pongo_abelii_CM009273.2 | 75559907  | 75560620  | HERVHF_pro  | - |
| Pongo_abelii_CM009273.2 | 75560771  | 75561169  | HERVHF_gag  | - |
| Pongo_abelii_CM009273.2 | 75562003  | 75562459  | HERVHF_3LTR | - |
| Pongo_abelii_CM009273.2 | 86930222  | 86930613  | HERVHF_5LTR | + |
| Pongo_abelii_CM009273.2 | 86931516  | 86931827  | HERVHF_gag  | + |
| Pongo_abelii_CM009273.2 | 86931915  | 86932670  | HERVHF_pro  | + |
| Pongo_abelii_CM009273.2 | 86932326  | 86934301  | HERVHF_pol  | + |
| Pongo_abelii_CM009273.2 | 86934369  | 86934766  | HERVHF_3LTR | + |
| Pongo_abelii_CM009273.2 | 111572361 | 111572777 | HERVHF_5LTR | - |
| Pongo_abelii_CM009273.2 | 111573359 | 111575140 | HERVHF_pol  | - |
| Pongo_abelii_CM009273.2 | 111577594 | 111578022 | HERVHF_3LTR | - |
| Pongo_abelii_CM009273.2 | 114487493 | 114487944 | HERVHF_5LTR | - |
| Pongo_abelii_CM009273.2 | 114488993 | 114491034 | HERVHF_pol  | - |
| Pongo_abelii_CM009273.2 | 114490471 | 114491247 | HERVHF_pro  | - |
| Pongo_abelii_CM009273.2 | 114493381 | 114493835 | HERVHF_3LTR | - |
| Pongo_abelii_CM009273.2 | 115670776 | 115671187 | HERVHF_5LTR | + |
| Pongo_abelii_CM009273.2 | 115673064 | 115673387 | HERVHF_gag  | + |
| Pongo_abelii_CM009273.2 | 115673757 | 115675628 | HERVHF_pol  | + |
| Pongo_abelii_CM009273.2 | 115676204 | 115676613 | HERVHF_3LTR | + |
| Pongo_abelii_CM009273.2 | 116729033 | 116729371 | HERVHF_5LTR | - |
| Pongo_abelii_CM009273.2 | 116729903 | 116732193 | HERVHF_pol  | - |
| Pongo_abelii_CM009273.2 | 116731534 | 116732481 | HERVHF_pro  | - |
| Pongo_abelii_CM009273.2 | 116732488 | 116732829 | HERVHF_gag  | - |
| Pongo_abelii_CM009273.2 | 116734283 | 116734620 | HERVHF_3LTR | - |
| Pongo_abelii_CM009274.2 | 1806073   | 1806413   | HERVHF_5LTR | + |
| Pongo_abelii_CM009274.2 | 1808131   | 1808517   | HERVHF_gag  | + |
| Pongo_abelii_CM009274.2 | 1808781   | 1810860   | HERVHF_pol  | + |
| Pongo_abelii_CM009274.2 | 1811364   | 1811713   | HERVHF_3LTR | + |
| Pongo_abelii_CM009274.2 | 5144028   | 5144499   | HERVHF_5LTR | - |
| Pongo_abelii_CM009274.2 | 5144664   | 5145110   | HERVHF_env  | - |
| Pongo_abelii_CM009274.2 | 5146740   | 5148956   | HERVHF_pol  | - |
| Pongo_abelii_CM009274.2 | 5148459   | 5149289   | HERVHF_pro  | - |
| Pongo_abelii_CM009274.2 | 5149421   | 5149753   | HERVHF_gag  | - |
| Pongo_abelii_CM009274.2 | 5150927   | 5151399   | HERVHF_3LTR | - |
| Pongo_abelii_CM009274.2 | 21236331  | 21236781  | HERVHF_5LTR | + |
| Pongo_abelii_CM009274.2 | 21238314  | 21238865  | HERVHF_gag  | + |
| Pongo_abelii_CM009274.2 | 21239080  | 21239469  | HERVHF_pro  | + |
| Pongo_abelii_CM009274.2 | 21239438  | 21241332  | HERVHF_pol  | + |
| Pongo_abelii_CM009274.2 | 21241609  | 21242060  | HERVHF_3LTR | + |
| Pongo_abelii_CM009274.2 | 35165551  | 35165924  | HERVHF_5LTR | + |
| Pongo_abelii_CM009274.2 | 35167995  | 35168810  | HERVHF_pro  | + |



|                         |           |           |             |   |
|-------------------------|-----------|-----------|-------------|---|
| Pongo_abelii_CM009274.2 | 35168964  | 35170886  | HERVHF_pol  | + |
| Pongo_abelii_CM009274.2 | 35172355  | 35173447  | HERVHF_env  | + |
| Pongo_abelii_CM009274.2 | 35173760  | 35174123  | HERVHF_3LTR | + |
| Pongo_abelii_CM009274.2 | 36434009  | 36434456  | HERVHF_5LTR | - |
| Pongo_abelii_CM009274.2 | 36435068  | 36437037  | HERVHF_pol  | - |
| Pongo_abelii_CM009274.2 | 36436609  | 36437202  | HERVHF_pro  | - |
| Pongo_abelii_CM009274.2 | 36439463  | 36439905  | HERVHF_3LTR | - |
| Pongo_abelii_CM009274.2 | 67855955  | 67856374  | HERVHF_5LTR | - |
| Pongo_abelii_CM009274.2 | 67856977  | 67858918  | HERVHF_pol  | - |
| Pongo_abelii_CM009274.2 | 67858355  | 67859155  | HERVHF_pro  | - |
| Pongo_abelii_CM009274.2 | 67861401  | 67861831  | HERVHF_3LTR | - |
| Pongo_abelii_CM009274.2 | 68995162  | 68995496  | HERVHF_5LTR | - |
| Pongo_abelii_CM009274.2 | 68996009  | 68998088  | HERVHF_pol  | - |
| Pongo_abelii_CM009274.2 | 68997600  | 68998424  | HERVHF_pro  | - |
| Pongo_abelii_CM009274.2 | 68998448  | 68998968  | HERVHF_gag  | - |
| Pongo_abelii_CM009274.2 | 69000761  | 69001098  | HERVHF_3LTR | - |
| Pongo_abelii_CM009274.2 | 70942203  | 70942596  | HERVHF_5LTR | - |
| Pongo_abelii_CM009274.2 | 70943184  | 70945156  | HERVHF_pol  | - |
| Pongo_abelii_CM009274.2 | 70945592  | 70946707  | HERVHF_gag  | - |
| Pongo_abelii_CM009274.2 | 70947680  | 70948060  | HERVHF_3LTR | - |
| Pongo_abelii_CM009274.2 | 72560242  | 72560662  | HERVHF_5LTR | + |
| Pongo_abelii_CM009274.2 | 72561696  | 72562529  | HERVHF_pro  | + |
| Pongo_abelii_CM009274.2 | 72561984  | 72564095  | HERVHF_pol  | + |
| Pongo_abelii_CM009274.2 | 72564500  | 72564921  | HERVHF_3LTR | + |
| Pongo_abelii_CM009274.2 | 74302517  | 74302820  | HERVHF_5LTR | + |
| Pongo_abelii_CM009274.2 | 74304404  | 74304715  | HERVHF_gag  | + |
| Pongo_abelii_CM009274.2 | 74304792  | 74305409  | HERVHF_pro  | + |
| Pongo_abelii_CM009274.2 | 74305035  | 74306263  | HERVHF_pol  | + |
| Pongo_abelii_CM009274.2 | 74308205  | 74308515  | HERVHF_3LTR | + |
| Pongo_abelii_CM009274.2 | 86201720  | 86202080  | HERVHF_5LTR | - |
| Pongo_abelii_CM009274.2 | 86202559  | 86204793  | HERVHF_pol  | - |
| Pongo_abelii_CM009274.2 | 86204278  | 86205006  | HERVHF_pro  | - |
| Pongo_abelii_CM009274.2 | 86206953  | 86207307  | HERVHF_3LTR | - |
| Pongo_abelii_CM009274.2 | 125920249 | 125920590 | HERVHF_5LTR | + |
| Pongo_abelii_CM009274.2 | 125921806 | 125922417 | HERVHF_gag  | + |
| Pongo_abelii_CM009274.2 | 125923176 | 125924891 | HERVHF_pol  | + |
| Pongo_abelii_CM009274.2 | 125926170 | 125926512 | HERVHF_3LTR | + |
| Pongo_abelii_CM009275.2 | 30829822  | 30830134  | HERVHF_5LTR | + |
| Pongo_abelii_CM009275.2 | 30831859  | 30832314  | HERVHF_gag  | + |
| Pongo_abelii_CM009275.2 | 30832612  | 30834866  | HERVHF_pol  | + |
| Pongo_abelii_CM009275.2 | 30835415  | 30835720  | HERVHF_3LTR | + |
| Pongo_abelii_CM009275.2 | 37845571  | 37845960  | HERVHF_5LTR | + |
| Pongo_abelii_CM009275.2 | 37847916  | 37848287  | HERVHF_gag  | + |
| Pongo_abelii_CM009275.2 | 37848404  | 37849189  | HERVHF_pro  | + |

|                         |                   |             |   |
|-------------------------|-------------------|-------------|---|
| Pongo_abelii_CM009275.2 | 37848875 37850553 | HERVHF_pol  | + |
| Pongo_abelii_CM009275.2 | 37851197 37851579 | HERVHF_3LTR | + |
| Pongo_abelii_CM009275.2 | 44373754 44374156 | HERVHF_5LTR | + |
| Pongo_abelii_CM009275.2 | 44375013 44375333 | HERVHF_gag  | + |
| Pongo_abelii_CM009275.2 | 44375340 44376188 | HERVHF_pro  | + |
| Pongo_abelii_CM009275.2 | 44375628 44377866 | HERVHF_pol  | + |
| Pongo_abelii_CM009275.2 | 44378934 44379341 | HERVHF_3LTR | + |
| Pongo_abelii_CM009275.2 | 49568632 49569087 | HERVHF_5LTR | - |
| Pongo_abelii_CM009275.2 | 49569902 49571719 | HERVHF_pol  | - |
| Pongo_abelii_CM009275.2 | 49571084 49571914 | HERVHF_pro  | - |
| Pongo_abelii_CM009275.2 | 49573878 49574332 | HERVHF_3LTR | - |
| Pongo_abelii_CM009275.2 | 61534765 61535151 | HERVHF_5LTR | - |
| Pongo_abelii_CM009275.2 | 61535910 61537908 | HERVHF_pol  | - |
| Pongo_abelii_CM009275.2 | 61537267 61538013 | HERVHF_pro  | - |
| Pongo_abelii_CM009275.2 | 61540647 61541045 | HERVHF_3LTR | - |
| Pongo_abelii_CM009275.2 | 63817792 63818145 | HERVHF_5LTR | + |
| Pongo_abelii_CM009275.2 | 63819930 63820256 | HERVHF_gag  | + |
| Pongo_abelii_CM009275.2 | 63820416 63822550 | HERVHF_pol  | + |
| Pongo_abelii_CM009275.2 | 63823713 63824062 | HERVHF_3LTR | + |
| Pongo_abelii_CM009275.2 | 64744222 64744675 | HERVHF_5LTR | + |
| Pongo_abelii_CM009275.2 | 64746711 64747538 | HERVHF_pro  | + |
| Pongo_abelii_CM009275.2 | 64746900 64748826 | HERVHF_pol  | + |
| Pongo_abelii_CM009275.2 | 64749263 64749717 | HERVHF_3LTR | + |
| Pongo_abelii_CM009275.2 | 65555266 65555623 | HERVHF_5LTR | + |
| Pongo_abelii_CM009275.2 | 65558098 65560694 | HERVHF_pol  | + |
| Pongo_abelii_CM009275.2 | 65561194 65561550 | HERVHF_3LTR | + |
| Pongo_abelii_CM009275.2 | 71069004 71069429 | HERVHF_5LTR | - |
| Pongo_abelii_CM009275.2 | 71069808 71071915 | HERVHF_pol  | - |
| Pongo_abelii_CM009275.2 | 71072257 71072589 | HERVHF_gag  | - |
| Pongo_abelii_CM009275.2 | 71074296 71074704 | HERVHF_3LTR | - |
| Pongo_abelii_CM009275.2 | 74897075 74897510 | HERVHF_5LTR | + |
| Pongo_abelii_CM009275.2 | 74899197 74899517 | HERVHF_gag  | + |
| Pongo_abelii_CM009275.2 | 74899524 74900357 | HERVHF_pro  | + |
| Pongo_abelii_CM009275.2 | 74899815 74901722 | HERVHF_pol  | + |
| Pongo_abelii_CM009275.2 | 74902347 74902780 | HERVHF_3LTR | + |
| Pongo_abelii_CM009275.2 | 80130626 80131079 | HERVHF_5LTR | + |
| Pongo_abelii_CM009275.2 | 80132729 80133070 | HERVHF_gag  | + |
| Pongo_abelii_CM009275.2 | 80133176 80133739 | HERVHF_pro  | + |
| Pongo_abelii_CM009275.2 | 80133482 80134989 | HERVHF_pol  | + |
| Pongo_abelii_CM009275.2 | 80136357 80136810 | HERVHF_3LTR | + |
| Pongo_abelii_CM009275.2 | 81802032 81802441 | HERVHF_5LTR | + |
| Pongo_abelii_CM009275.2 | 81804185 81804514 | HERVHF_gag  | + |
| Pongo_abelii_CM009275.2 | 81804940 81806950 | HERVHF_pol  | + |
| Pongo_abelii_CM009275.2 | 81807539 81807962 | HERVHF_3LTR | + |

|                         |                   |             |   |
|-------------------------|-------------------|-------------|---|
| Pongo_abelii_CM009275.2 | 93489520 93489951 | HERVHF_5LTR | + |
| Pongo_abelii_CM009275.2 | 93491805 93492104 | HERVHF_gag  | + |
| Pongo_abelii_CM009275.2 | 93492303 93492968 | HERVHF_pro  | + |
| Pongo_abelii_CM009275.2 | 93492414 93494325 | HERVHF_pol  | + |
| Pongo_abelii_CM009275.2 | 93494765 93495197 | HERVHF_3LTR | + |
| Pongo_abelii_CM009276.2 | 11131924 11132382 | HERVHF_5LTR | - |
| Pongo_abelii_CM009276.2 | 11132770 11134727 | HERVHF_pol  | - |
| Pongo_abelii_CM009276.2 | 11134478 11135212 | HERVHF_pro  | - |
| Pongo_abelii_CM009276.2 | 11135219 11135548 | HERVHF_gag  | - |
| Pongo_abelii_CM009276.2 | 11137455 11137918 | HERVHF_3LTR | - |
| Pongo_abelii_CM009276.2 | 19073091 19073535 | HERVHF_5LTR | + |
| Pongo_abelii_CM009276.2 | 19074987 19075977 | HERVHF_gag  | + |
| Pongo_abelii_CM009276.2 | 19076168 19076839 | HERVHF_pro  | + |
| Pongo_abelii_CM009276.2 | 19076195 19078199 | HERVHF_pol  | + |
| Pongo_abelii_CM009276.2 | 19078640 19079007 | HERVHF_env  | + |
| Pongo_abelii_CM009276.2 | 19079019 19079470 | HERVHF_3LTR | + |
| Pongo_abelii_CM009276.2 | 29507902 29508305 | HERVHF_5LTR | - |
| Pongo_abelii_CM009276.2 | 29508723 29511035 | HERVHF_pol  | - |
| Pongo_abelii_CM009276.2 | 29510505 29511035 | HERVHF_pro  | - |
| Pongo_abelii_CM009276.2 | 29511338 29511907 | HERVHF_gag  | - |
| Pongo_abelii_CM009276.2 | 29513221 29513626 | HERVHF_3LTR | - |
| Pongo_abelii_CM009276.2 | 77695751 77696152 | HERVHF_5LTR | + |
| Pongo_abelii_CM009276.2 | 77697791 77698117 | HERVHF_gag  | + |
| Pongo_abelii_CM009276.2 | 77698151 77699071 | HERVHF_pro  | + |
| Pongo_abelii_CM009276.2 | 77698586 77700690 | HERVHF_pol  | + |
| Pongo_abelii_CM009276.2 | 77701135 77701536 | HERVHF_3LTR | + |
| Pongo_abelii_CM009276.2 | 83062340 83062690 | HERVHF_5LTR | - |
| Pongo_abelii_CM009276.2 | 83063547 83065801 | HERVHF_pol  | - |
| Pongo_abelii_CM009276.2 | 83065166 83066005 | HERVHF_pro  | - |
| Pongo_abelii_CM009276.2 | 83066057 83066371 | HERVHF_gag  | - |
| Pongo_abelii_CM009276.2 | 83067941 83068280 | HERVHF_3LTR | - |
| Pongo_abelii_CM009277.2 | 29193303 29193745 | HERVHF_5LTR | - |
| Pongo_abelii_CM009277.2 | 29194155 29196141 | HERVHF_pol  | - |
| Pongo_abelii_CM009277.2 | 29195716 29196312 | HERVHF_pro  | - |
| Pongo_abelii_CM009277.2 | 29196587 29196886 | HERVHF_gag  | - |
| Pongo_abelii_CM009277.2 | 29198874 29199315 | HERVHF_3LTR | - |
| Pongo_abelii_CM009277.2 | 29496004 29496323 | HERVHF_5LTR | + |
| Pongo_abelii_CM009277.2 | 29498058 29498387 | HERVHF_gag  | + |
| Pongo_abelii_CM009277.2 | 29498397 29499245 | HERVHF_pro  | + |
| Pongo_abelii_CM009277.2 | 29498682 29500643 | HERVHF_pol  | + |
| Pongo_abelii_CM009277.2 | 29501347 29501677 | HERVHF_3LTR | + |
| Pongo_abelii_CM009277.2 | 68881615 68882063 | HERVHF_5LTR | - |
| Pongo_abelii_CM009277.2 | 68882670 68884679 | HERVHF_pol  | - |
| Pongo_abelii_CM009277.2 | 68884422 68885051 | HERVHF_pro  | - |

|                         |                   |             |   |
|-------------------------|-------------------|-------------|---|
| Pongo_abelii_CM009277.2 | 68887295 68887734 | HERVHF_3LTR | - |
| Pongo_abelii_CM009277.2 | 72871317 72871743 | HERVHF_5LTR | + |
| Pongo_abelii_CM009277.2 | 72873429 72873869 | HERVHF_gag  | + |
| Pongo_abelii_CM009277.2 | 72873916 72874719 | HERVHF_pro  | + |
| Pongo_abelii_CM009277.2 | 72874831 72876472 | HERVHF_pol  | + |
| Pongo_abelii_CM009277.2 | 72876864 72877300 | HERVHF_3LTR | + |
| Pongo_abelii_CM009277.2 | 80883269 80883698 | HERVHF_5LTR | + |
| Pongo_abelii_CM009277.2 | 80885274 80885717 | HERVHF_gag  | + |
| Pongo_abelii_CM009277.2 | 80886146 80888339 | HERVHF_pol  | + |
| Pongo_abelii_CM009277.2 | 80888716 80889141 | HERVHF_3LTR | + |
| Pongo_abelii_CM009277.2 | 81513881 81514254 | HERVHF_5LTR | + |
| Pongo_abelii_CM009277.2 | 81515847 81516251 | HERVHF_gag  | + |
| Pongo_abelii_CM009277.2 | 81516397 81517083 | HERVHF_pro  | + |
| Pongo_abelii_CM009277.2 | 81516574 81518677 | HERVHF_pol  | + |
| Pongo_abelii_CM009277.2 | 81519215 81519575 | HERVHF_3LTR | + |
| Pongo_abelii_CM009278.2 | 10567617 10568068 | HERVHF_5LTR | - |
| Pongo_abelii_CM009278.2 | 10569056 10571160 | HERVHF_pol  | - |
| Pongo_abelii_CM009278.2 | 10570561 10571364 | HERVHF_pro  | - |
| Pongo_abelii_CM009278.2 | 10571797 10572324 | HERVHF_gag  | - |
| Pongo_abelii_CM009278.2 | 10573932 10574382 | HERVHF_3LTR | - |
| Pongo_abelii_CM009278.2 | 37406037 37406381 | HERVHF_5LTR | - |
| Pongo_abelii_CM009278.2 | 37407042 37408956 | HERVHF_pol  | - |
| Pongo_abelii_CM009278.2 | 37408414 37409220 | HERVHF_pro  | - |
| Pongo_abelii_CM009278.2 | 37409274 37409573 | HERVHF_gag  | - |
| Pongo_abelii_CM009278.2 | 37411281 37411630 | HERVHF_3LTR | - |
| Pongo_abelii_CM009279.2 | 51338168 51338627 | HERVHF_5LTR | - |
| Pongo_abelii_CM009279.2 | 51339404 51340927 | HERVHF_pol  | - |
| Pongo_abelii_CM009279.2 | 51340610 51341443 | HERVHF_pro  | - |
| Pongo_abelii_CM009279.2 | 51341476 51341784 | HERVHF_gag  | - |
| Pongo_abelii_CM009279.2 | 51343913 51344376 | HERVHF_3LTR | - |
| Pongo_abelii_CM009279.2 | 60300149 60300616 | HERVHF_5LTR | - |
| Pongo_abelii_CM009279.2 | 60301145 60303173 | HERVHF_pol  | - |
| Pongo_abelii_CM009279.2 | 60302577 60303425 | HERVHF_pro  | - |
| Pongo_abelii_CM009279.2 | 60303493 60303840 | HERVHF_gag  | - |
| Pongo_abelii_CM009279.2 | 60305573 60306036 | HERVHF_3LTR | - |
| Pongo_abelii_CM009279.2 | 67400065 67400499 | HERVHF_5LTR | - |
| Pongo_abelii_CM009279.2 | 67400658 67401220 | HERVHF_env  | - |
| Pongo_abelii_CM009279.2 | 67401511 67403384 | HERVHF_pol  | - |
| Pongo_abelii_CM009279.2 | 67402856 67403818 | HERVHF_pro  | - |
| Pongo_abelii_CM009279.2 | 67405862 67406295 | HERVHF_3LTR | - |
| Pongo_abelii_CM009280.2 | 917546 918060     | HERVK_5LTR  | - |
| Pongo_abelii_CM009280.2 | 918148 918465     | HERVK_env   | - |
| Pongo_abelii_CM009280.2 | 918933 920066     | HERVK_pol   | - |
| Pongo_abelii_CM009280.2 | 920003 920935     | HERVK_pro   | - |

|                         |          |          |             |   |
|-------------------------|----------|----------|-------------|---|
| Pongo_abelii_CM009280.2 | 922334   | 922849   | HERVK_3LTR  | - |
| Pongo_abelii_CM009280.2 | 29899546 | 29900098 | HERVHF_5LTR | + |
| Pongo_abelii_CM009280.2 | 29902117 | 29902416 | HERVHF_gag  | + |
| Pongo_abelii_CM009280.2 | 29902463 | 29903242 | HERVHF_pro  | + |
| Pongo_abelii_CM009280.2 | 29902631 | 29904379 | HERVHF_pol  | + |
| Pongo_abelii_CM009280.2 | 29905207 | 29905959 | HERVHF_env  | + |
| Pongo_abelii_CM009280.2 | 29906711 | 29907248 | HERVHF_3LTR | + |
| Pongo_abelii_CM009280.2 | 30039027 | 30039456 | HERVHF_5LTR | - |
| Pongo_abelii_CM009280.2 | 30039898 | 30042032 | HERVHF_pol  | - |
| Pongo_abelii_CM009280.2 | 30042034 | 30042465 | HERVHF_pro  | - |
| Pongo_abelii_CM009280.2 | 30042465 | 30042890 | HERVHF_gag  | - |
| Pongo_abelii_CM009280.2 | 30044264 | 30044671 | HERVHF_3LTR | - |
| Pongo_abelii_CM009280.2 | 37467767 | 37468176 | HERVHF_5LTR | + |
| Pongo_abelii_CM009280.2 | 37469884 | 37470207 | HERVHF_gag  | + |
| Pongo_abelii_CM009280.2 | 37470496 | 37472574 | HERVHF_pol  | + |
| Pongo_abelii_CM009280.2 | 37473028 | 37473433 | HERVHF_3LTR | + |
| Pongo_abelii_CM009280.2 | 52242989 | 52243438 | HERVHF_5LTR | - |
| Pongo_abelii_CM009280.2 | 52243606 | 52245336 | HERVHF_env  | - |
| Pongo_abelii_CM009280.2 | 52245648 | 52247984 | HERVHF_pol  | - |
| Pongo_abelii_CM009280.2 | 52247394 | 52247975 | HERVHF_pro  | - |
| Pongo_abelii_CM009280.2 | 52250390 | 52250842 | HERVHF_3LTR | - |
| Pongo_abelii_CM009281.2 | 45697098 | 45697522 | HERVHF_5LTR | + |
| Pongo_abelii_CM009281.2 | 45699123 | 45699776 | HERVHF_gag  | + |
| Pongo_abelii_CM009281.2 | 45699886 | 45700662 | HERVHF_pro  | + |
| Pongo_abelii_CM009281.2 | 45700234 | 45702480 | HERVHF_pol  | + |
| Pongo_abelii_CM009281.2 | 45702887 | 45703304 | HERVHF_3LTR | + |
| Pongo_abelii_CM009282.2 | 27520021 | 27520390 | HERVHF_5LTR | - |
| Pongo_abelii_CM009282.2 | 27520565 | 27521698 | HERVHF_env  | - |
| Pongo_abelii_CM009282.2 | 27522999 | 27523796 | HERVHF_pol  | - |
| Pongo_abelii_CM009282.2 | 27523260 | 27523970 | HERVHF_pro  | - |
| Pongo_abelii_CM009282.2 | 27525628 | 27525987 | HERVHF_3LTR | - |
| Pongo_abelii_CM009282.2 | 52314002 | 52314442 | HERVHF_5LTR | - |
| Pongo_abelii_CM009282.2 | 52314851 | 52317012 | HERVHF_pol  | - |
| Pongo_abelii_CM009282.2 | 52316422 | 52317003 | HERVHF_pro  | - |
| Pongo_abelii_CM009282.2 | 52317278 | 52317577 | HERVHF_gag  | - |
| Pongo_abelii_CM009282.2 | 52319227 | 52319670 | HERVHF_3LTR | - |
| Pongo_abelii_CM009283.2 | 3070204  | 3070669  | HERVHF_5LTR | - |
| Pongo_abelii_CM009283.2 | 3071078  | 3073240  | HERVHF_pol  | - |
| Pongo_abelii_CM009283.2 | 3073651  | 3073950  | HERVHF_gag  | - |
| Pongo_abelii_CM009283.2 | 3075499  | 3075955  | HERVHF_3LTR | - |
| Pongo_abelii_CM009283.2 | 4008829  | 4009233  | HERVHF_5LTR | + |
| Pongo_abelii_CM009283.2 | 4011016  | 4011357  | HERVHF_gag  | + |
| Pongo_abelii_CM009283.2 | 4011415  | 4012287  | HERVHF_pro  | + |
| Pongo_abelii_CM009283.2 | 4011577  | 4014109  | HERVHF_pol  | + |

|                         |           |           |             |   |
|-------------------------|-----------|-----------|-------------|---|
| Pongo_abelii_CM009283.2 | 4014561   | 4014966   | HERVHF_3LTR | + |
| Pongo_abelii_CM009283.2 | 13770177  | 13770595  | HERVHF_5LTR | - |
| Pongo_abelii_CM009283.2 | 13771015  | 13773267  | HERVHF_pol  | - |
| Pongo_abelii_CM009283.2 | 13775495  | 13775908  | HERVHF_3LTR | - |
| Pongo_abelii_CM009283.2 | 15734079  | 15734494  | HERVHF_5LTR | + |
| Pongo_abelii_CM009283.2 | 15736570  | 15737151  | HERVHF_pro  | + |
| Pongo_abelii_CM009283.2 | 15736609  | 15738548  | HERVHF_pol  | + |
| Pongo_abelii_CM009283.2 | 15739133  | 15739561  | HERVHF_3LTR | + |
| Pongo_abelii_CM009285.2 | 26779043  | 26779454  | HERVHF_5LTR | + |
| Pongo_abelii_CM009285.2 | 26781343  | 26782092  | HERVHF_pro  | + |
| Pongo_abelii_CM009285.2 | 26781508  | 26783397  | HERVHF_pol  | + |
| Pongo_abelii_CM009285.2 | 26784293  | 26784705  | HERVHF_3LTR | + |
| Pongo_abelii_CM009285.2 | 27145831  | 27146251  | HERVHF_5LTR | - |
| Pongo_abelii_CM009285.2 | 27146709  | 27148922  | HERVHF_pol  | - |
| Pongo_abelii_CM009285.2 | 27149220  | 27149549  | HERVHF_gag  | - |
| Pongo_abelii_CM009285.2 | 27150987  | 27151406  | HERVHF_3LTR | - |
| Pongo_abelii_CM009285.2 | 28083761  | 28084074  | HERVHF_5LTR | + |
| Pongo_abelii_CM009285.2 | 28086244  | 28088492  | HERVHF_pol  | + |
| Pongo_abelii_CM009285.2 | 28089122  | 28089437  | HERVHF_3LTR | + |
| Pongo_abelii_CM009285.2 | 69972225  | 69972648  | HERVHF_5LTR | - |
| Pongo_abelii_CM009285.2 | 69973231  | 69974984  | HERVHF_pol  | - |
| Pongo_abelii_CM009285.2 | 69974577  | 69975323  | HERVHF_pro  | - |
| Pongo_abelii_CM009285.2 | 69975434  | 69975733  | HERVHF_gag  | - |
| Pongo_abelii_CM009285.2 | 69977375  | 69977791  | HERVHF_3LTR | - |
| Pongo_abelii_CM009285.2 | 76768998  | 76769429  | HERVHF_5LTR | + |
| Pongo_abelii_CM009285.2 | 76770143  | 76771114  | HERVHF_gag  | + |
| Pongo_abelii_CM009285.2 | 76771952  | 76774108  | HERVHF_pol  | + |
| Pongo_abelii_CM009285.2 | 76774614  | 76774964  | HERVHF_env  | + |
| Pongo_abelii_CM009285.2 | 76775128  | 76775559  | HERVHF_3LTR | + |
| Pongo_abelii_CM009285.2 | 85207773  | 85208092  | HERVHF_5LTR | + |
| Pongo_abelii_CM009285.2 | 85209738  | 85210496  | HERVHF_pro  | + |
| Pongo_abelii_CM009285.2 | 85209879  | 85211901  | HERVHF_pol  | + |
| Pongo_abelii_CM009285.2 | 85212475  | 85212790  | HERVHF_3LTR | + |
| Pongo_abelii_CM009285.2 | 103701996 | 103702447 | HERVHF_5LTR | + |
| Pongo_abelii_CM009285.2 | 103704982 | 103706913 | HERVHF_pol  | + |
| Pongo_abelii_CM009285.2 | 103706876 | 103707193 | HERVHF_env  | + |
| Pongo_abelii_CM009285.2 | 103707356 | 103707808 | HERVHF_3LTR | + |
| Pongo_abelii_CM009285.2 | 108632360 | 108632768 | HERVHF_5LTR | + |
| Pongo_abelii_CM009285.2 | 108634194 | 108634703 | HERVHF_gag  | + |
| Pongo_abelii_CM009285.2 | 108634830 | 108635588 | HERVHF_pro  | + |
| Pongo_abelii_CM009285.2 | 108635067 | 108637372 | HERVHF_pol  | + |
| Pongo_abelii_CM009285.2 | 108643495 | 108643887 | HERVHF_3LTR | + |
| Pongo_abelii_CM009285.2 | 109151223 | 109151656 | HERVHF_5LTR | - |
| Pongo_abelii_CM009285.2 | 109152250 | 109154197 | HERVHF_pol  | - |

|                             |           |           |             |   |
|-----------------------------|-----------|-----------|-------------|---|
| Pongo_abelii_CM009285.2     | 109153619 | 109154320 | HERVHF_pro  | - |
| Pongo_abelii_CM009285.2     | 109154472 | 109154855 | HERVHF_gag  | - |
| Pongo_abelii_CM009285.2     | 109156701 | 109157133 | HERVHF_3LTR | - |
| Pongo_abelii_CM009285.2     | 119911835 | 119912269 | HERVHF_5LTR | - |
| Pongo_abelii_CM009285.2     | 119912889 | 119914876 | HERVHF_pol  | - |
| Pongo_abelii_CM009285.2     | 119914238 | 119915368 | HERVHF_pro  | - |
| Pongo_abelii_CM009285.2     | 119915072 | 119915455 | HERVHF_gag  | - |
| Pongo_abelii_CM009285.2     | 119917000 | 119917432 | HERVHF_3LTR | - |
| Pongo_abelii_CM009285.2     | 137292269 | 137292681 | HERVHF_5LTR | - |
| Pongo_abelii_CM009285.2     | 137293591 | 137295380 | HERVHF_pol  | - |
| Pongo_abelii_CM009285.2     | 137295812 | 137296153 | HERVHF_gag  | - |
| Pongo_abelii_CM009285.2     | 137297528 | 137297941 | HERVHF_3LTR | - |
| Pongo_abelii_KZ622955.1     | 849918    | 850328    | HERVHF_5LTR | + |
| Pongo_abelii_KZ622955.1     | 852894    | 854411    | HERVHF_pol  | + |
| Pongo_abelii_KZ622955.1     | 855504    | 855910    | HERVHF_3LTR | + |
| Pongo_abelii_NDHI03000125.1 | 27007     | 27343     | HERVHF_5LTR | - |
| Pongo_abelii_NDHI03000125.1 | 27984     | 29932     | HERVHF_pol  | - |
| Pongo_abelii_NDHI03000125.1 | 29360     | 30178     | HERVHF_pro  | - |
| Pongo_abelii_NDHI03000125.1 | 32383     | 32721     | HERVHF_3LTR | - |
| Pongo_abelii_NDHI03000614.1 | 34943948  |           | HERVHF_5LTR | + |
| Pongo_abelii_NDHI03000614.1 | 60126857  |           | HERVHF_pro  | + |
| Pongo_abelii_NDHI03000614.1 | 63157609  |           | HERVHF_pol  | + |
| Pongo_abelii_NDHI03000614.1 | 88329284  |           | HERVHF_3LTR | + |
| Pongo_abelii_NDHI03003893.1 | 83150     | 83604     | HERVHF_5LTR | + |
| Pongo_abelii_NDHI03003893.1 | 85515     | 85844     | HERVHF_gag  | + |
| Pongo_abelii_NDHI03003893.1 | 85848     | 86681     | HERVHF_pro  | + |
| Pongo_abelii_NDHI03003893.1 | 86184     | 88245     | HERVHF_pol  | + |
| Pongo_abelii_NDHI03003893.1 | 88655     | 89110     | HERVHF_3LTR | + |
| Pongo_abelii_NDHI03003980.1 | 132789    | 133113    | HERVHF_5LTR | + |
| Pongo_abelii_NDHI03003980.1 | 134725    | 135165    | HERVHF_gag  | + |
| Pongo_abelii_NDHI03003980.1 | 135275    | 135880    | HERVHF_pro  | + |
| Pongo_abelii_NDHI03003980.1 | 135469    | 137665    | HERVHF_pol  | + |
| Pongo_abelii_NDHI03003980.1 | 137729    | 138053    | HERVHF_env  | + |
| Pongo_abelii_NDHI03003980.1 | 138071    | 138390    | HERVHF_3LTR | + |
| Pongo_abelii_NDHI03004321.1 | 18642311  |           | HERVHF_5LTR | + |
| Pongo_abelii_NDHI03004321.1 | 37634221  |           | HERVHF_gag  | + |
| Pongo_abelii_NDHI03004321.1 | 45515408  |           | HERVHF_pro  | + |
| Pongo_abelii_NDHI03004321.1 | 47556740  |           | HERVHF_pol  | + |
| Pongo_abelii_NDHI03004321.1 | 73537799  |           | HERVHF_3LTR | + |
| Pongo_abelii_NDHI03004652.1 | 52934     | 53243     | HERVHF_5LTR | + |
| Pongo_abelii_NDHI03004652.1 | 55043     | 55366     | HERVHF_gag  | + |
| Pongo_abelii_NDHI03004652.1 | 55507     | 56307     | HERVHF_pro  | + |
| Pongo_abelii_NDHI03004652.1 | 55744     | 57435     | HERVHF_pol  | + |
| Pongo_abelii_NDHI03004652.1 | 58258     | 58571     | HERVHF_3LTR | + |

|                             |          |          |                |   |
|-----------------------------|----------|----------|----------------|---|
| Pongo_abelii_NDHI03004823.1 | 27589    | 28043    | HERVHF_5LTR    | + |
| Pongo_abelii_NDHI03004823.1 | 29778    | 30191    | HERVHF_gag     | + |
| Pongo_abelii_NDHI03004823.1 | 30503    | 30970    | HERVHF_pro     | + |
| Pongo_abelii_NDHI03004823.1 | 30623    | 32612    | HERVHF_pol     | + |
| Pongo_abelii_NDHI03004823.1 | 33021    | 33472    | HERVHF_3LTR    | + |
| Pongo_pygmaeus_ctg10        | 5187447  | 5187785  | HERVIPADP_5LTR | + |
| Pongo_pygmaeus_ctg10        | 5190547  | 5193035  | HERVIPADP_pol  | + |
| Pongo_pygmaeus_ctg10        | 5194432  | 5195139  | HERVIPADP_env  | + |
| Pongo_pygmaeus_ctg10        | 5195396  | 5195721  | HERVIPADP_3LTR | + |
| Pongo_pygmaeus_ctg11        | 41236857 | 41237225 | HERVHF_5LTR    | - |
| Pongo_pygmaeus_ctg11        | 41237930 | 41241626 | HERVHF_pol     | - |
| Pongo_pygmaeus_ctg11        | 41241996 | 41243018 | HERVHF_gag     | - |
| Pongo_pygmaeus_ctg11        | 41244400 | 41244779 | HERVHF_3LTR    | - |
| Pongo_pygmaeus_ctg118       | 8510861  | 8511285  | HERVHF_5LTR    | - |
| Pongo_pygmaeus_ctg118       | 8511717  | 8512880  | HERVHF_pol     | - |
| Pongo_pygmaeus_ctg118       | 8512416  | 8513219  | HERVHF_pro     | - |
| Pongo_pygmaeus_ctg118       | 8513253  | 8513693  | HERVHF_gag     | - |
| Pongo_pygmaeus_ctg118       | 8515404  | 8515845  | HERVHF_3LTR    | - |
| Pongo_pygmaeus_ctg127       | 6274998  | 6275462  | HERVK_5LTR     | + |
| Pongo_pygmaeus_ctg127       | 6276952  | 6277857  | HERVK_pro      | + |
| Pongo_pygmaeus_ctg127       | 6277781  | 6279679  | HERVK_pol      | + |
| Pongo_pygmaeus_ctg127       | 6280608  | 6281078  | HERVK_3LTR     | + |
| Pongo_pygmaeus_ctg17        | 10560545 | 10560926 | HERVHF_5LTR    | + |
| Pongo_pygmaeus_ctg17        | 10562353 | 10562826 | HERVHF_gag     | + |
| Pongo_pygmaeus_ctg17        | 10563408 | 10566219 | HERVHF_pol     | + |
| Pongo_pygmaeus_ctg17        | 10567102 | 10567480 | HERVHF_3LTR    | + |
| Pongo_pygmaeus_ctg17        | 25978851 | 25979234 | HUERSP_5LTR    | + |
| Pongo_pygmaeus_ctg17        | 25981520 | 25982164 | HUERSP_gag     | + |
| Pongo_pygmaeus_ctg17        | 25982891 | 25985866 | HUERSP_pol     | + |
| Pongo_pygmaeus_ctg17        | 25986660 | 25987043 | HUERSP_3LTR    | + |
| Pongo_pygmaeus_ctg182       | 1739756  | 1740075  | HERVK_5LTR     | - |
| Pongo_pygmaeus_ctg182       | 1741648  | 1743386  | HERVK_pol      | - |
| Pongo_pygmaeus_ctg182       | 1743643  | 1744218  | HERVK_pro      | - |
| Pongo_pygmaeus_ctg182       | 1744272  | 1745227  | HERVK_gag      | - |
| Pongo_pygmaeus_ctg182       | 1753496  | 1753805  | HERVK_3LTR     | - |
| Pongo_pygmaeus_ctg186       | 3174171  | 3174507  | HERVHF_5LTR    | - |
| Pongo_pygmaeus_ctg186       | 3175182  | 3175748  | HERVHF_env     | - |
| Pongo_pygmaeus_ctg186       | 3175788  | 3176327  | HERVHF_pol     | - |
| Pongo_pygmaeus_ctg186       | 3177037  | 3177744  | HERVHF_gag     | - |
| Pongo_pygmaeus_ctg186       | 3179260  | 3179598  | HERVHF_3LTR    | - |
| Pongo_pygmaeus_ctg2         | 20244924 | 20245257 | HERVK_5LTR     | + |
| Pongo_pygmaeus_ctg2         | 20245778 | 20247027 | HERVK_gag      | + |
| Pongo_pygmaeus_ctg2         | 20246973 | 20247617 | HERVK_pro      | + |
| Pongo_pygmaeus_ctg2         | 20247808 | 20248954 | HERVK_pol      | + |



|                       |          |          |                |   |
|-----------------------|----------|----------|----------------|---|
| Pongo_pygmaeus_ctg2   | 20249583 | 20249948 | HERVK_env      | + |
| Pongo_pygmaeus_ctg2   | 20250153 | 20250490 | HERVK_3LTR     | + |
| Pongo_pygmaeus_ctg24  | 13655583 | 13655993 | HERVIPADP_5LTR | + |
| Pongo_pygmaeus_ctg24  | 13660315 | 13662914 | HERVIPADP_pol  | + |
| Pongo_pygmaeus_ctg24  | 13664666 | 13665904 | HERVIPADP_env  | + |
| Pongo_pygmaeus_ctg24  | 13666146 | 13666554 | HERVIPADP_3LTR | + |
| Pongo_pygmaeus_ctg25  | 24997643 | 24997999 | HUERSP_5LTR    | - |
| Pongo_pygmaeus_ctg25  | 25005589 | 25007415 | HUERSP_pol     | - |
| Pongo_pygmaeus_ctg25  | 25008057 | 25008482 | HUERSP_gag     | - |
| Pongo_pygmaeus_ctg25  | 25012310 | 25012661 | HUERSP_3LTR    | - |
| Pongo_pygmaeus_ctg27  | 48366463 | 48366866 | HERVHF_5LTR    | + |
| Pongo_pygmaeus_ctg27  | 48367678 | 48370644 | HERVHF_pol     | + |
| Pongo_pygmaeus_ctg27  | 48371096 | 48371504 | HERVHF_3LTR    | + |
| Pongo_pygmaeus_ctg27  | 63644205 | 63644705 | HERVK_5LTR     | - |
| Pongo_pygmaeus_ctg27  | 63644712 | 63645236 | HERVK_env      | - |
| Pongo_pygmaeus_ctg27  | 63645980 | 63646819 | HERVK_pol      | - |
| Pongo_pygmaeus_ctg27  | 63646714 | 63647655 | HERVK_pro      | - |
| Pongo_pygmaeus_ctg27  | 63648391 | 63648903 | HERVK_3LTR     | - |
| Pongo_pygmaeus_ctg270 | 1002231  | 1002664  | HERVK_5LTR     | - |
| Pongo_pygmaeus_ctg270 | 1004274  | 1005491  | HERVK_pol      | - |
| Pongo_pygmaeus_ctg270 | 1005410  | 1006322  | HERVK_pro      | - |
| Pongo_pygmaeus_ctg270 | 1007237  | 1007685  | HERVK_3LTR     | - |
| Pongo_pygmaeus_ctg3   | 1782684  | 1783026  | HERVHF_5LTR    | - |
| Pongo_pygmaeus_ctg3   | 1783258  | 1784092  | HERVHF_env     | - |
| Pongo_pygmaeus_ctg3   | 1784797  | 1788228  | HERVHF_pol     | - |
| Pongo_pygmaeus_ctg3   | 1788224  | 1788694  | HERVHF_pro     | - |
| Pongo_pygmaeus_ctg3   | 1788911  | 1789333  | HERVHF_gag     | - |
| Pongo_pygmaeus_ctg3   | 1797036  | 1797366  | HERVHF_3LTR    | - |
| Pongo_pygmaeus_ctg3   | 18122978 | 18123338 | HERVIPADP_5LTR | + |
| Pongo_pygmaeus_ctg3   | 18126011 | 18129065 | HERVIPADP_pol  | + |
| Pongo_pygmaeus_ctg3   | 18130146 | 18130523 | HERVIPADP_env  | + |
| Pongo_pygmaeus_ctg3   | 18131262 | 18131619 | HERVIPADP_3LTR | + |
| Pongo_pygmaeus_ctg334 | 1015094  | 1015481  | HERVK_5LTR     | + |
| Pongo_pygmaeus_ctg334 | 1016483  | 1017262  | HERVK_pro      | + |
| Pongo_pygmaeus_ctg334 | 1017157  | 1018423  | HERVK_pol      | + |
| Pongo_pygmaeus_ctg334 | 1019333  | 1019722  | HERVK_3LTR     | + |
| Pongo_pygmaeus_ctg35  | 38505333 | 38505735 | HERVHF_5LTR    | + |
| Pongo_pygmaeus_ctg35  | 38507509 | 38507814 | HERVHF_gag     | + |
| Pongo_pygmaeus_ctg35  | 38507850 | 38508680 | HERVHF_pro     | + |
| Pongo_pygmaeus_ctg35  | 38508039 | 38510265 | HERVHF_pol     | + |
| Pongo_pygmaeus_ctg35  | 38510661 | 38511060 | HERVHF_3LTR    | + |
| Pongo_pygmaeus_ctg53  | 1530975  | 1531297  | HERVHF_5LTR    | + |
| Pongo_pygmaeus_ctg53  | 1533777  | 1534703  | HERVHF_pro     | + |
| Pongo_pygmaeus_ctg53  | 1534203  | 1536514  | HERVHF_pol     | + |

|                               |          |          |                |   |
|-------------------------------|----------|----------|----------------|---|
| Pongo_pygmaeus_ctg53          | 1537092  | 1537410  | HERVHF_3LTR    | + |
| Pongo_pygmaeus_ctg6           | 16858518 | 16858908 | HERVHF_5LTR    | + |
| Pongo_pygmaeus_ctg6           | 16863611 | 16864042 | HERVHF_gag     | + |
| Pongo_pygmaeus_ctg6           | 16864888 | 16865721 | HERVHF_pro     | + |
| Pongo_pygmaeus_ctg6           | 16865377 | 16866320 | HERVHF_pol     | + |
| Pongo_pygmaeus_ctg6           | 16872426 | 16872820 | HERVHF_3LTR    | + |
| Pongo_pygmaeus_ctg7           | 13982397 | 13982794 | HSERVIII_5LTR  | - |
| Pongo_pygmaeus_ctg7           | 13983587 | 13986530 | HSERVIII_pol   | - |
| Pongo_pygmaeus_ctg7           | 13988926 | 13989311 | HSERVIII_3LTR  | - |
| Pongo_pygmaeus_ctg8           | 56807488 | 56807996 | HERVK_5LTR     | + |
| Pongo_pygmaeus_ctg8           | 56809916 | 56810674 | HERVK_pro      | + |
| Pongo_pygmaeus_ctg8           | 56810569 | 56812486 | HERVK_pol      | + |
| Pongo_pygmaeus_ctg8           | 56813290 | 56813795 | HERVK_3LTR     | + |
| Pongo_pygmaeus_ctg87          | 7422280  | 7422637  | HSERVIII_5LTR  | - |
| Pongo_pygmaeus_ctg87          | 7423226  | 7426259  | HSERVIII_pol   | - |
| Pongo_pygmaeus_ctg87          | 7428304  | 7428667  | HSERVIII_3LTR  | - |
| Pongo_pygmaeus_ctg9           | 669003   | 669458   | HERVIPADP_5LTR | - |
| Pongo_pygmaeus_ctg9           | 669753   | 670232   | HERVIPADP_env  | - |
| Pongo_pygmaeus_ctg9           | 672259   | 674464   | HERVIPADP_pol  | - |
| Pongo_pygmaeus_ctg9           | 674695   | 675105   | HERVIPADP_gag  | - |
| Pongo_pygmaeus_ctg9           | 676608   | 677076   | HERVIPADP_3LTR | - |
| Prolemur_simus_MPIZ01001670.1 | 146461   | 146923   | HERVHF_5LTR    | + |
| Prolemur_simus_MPIZ01001670.1 | 147945   | 148361   | HERVHF_gag     | + |
| Prolemur_simus_MPIZ01001670.1 | 148389   | 148955   | HERVHF_pro     | + |
| Prolemur_simus_MPIZ01001670.1 | 148961   | 149584   | HERVHF_pol     | + |
| Prolemur_simus_MPIZ01001670.1 | 151333   | 151795   | HERVHF_3LTR    | + |
| Pygathrix_nemaeus_ctg1        | 13462522 | 13463026 | HERVK_5LTR     | - |
| Pygathrix_nemaeus_ctg1        | 13464106 | 13465833 | HERVK_pol      | - |
| Pygathrix_nemaeus_ctg1        | 13465883 | 13466669 | HERVK_pro      | - |
| Pygathrix_nemaeus_ctg1        | 13467540 | 13468045 | HERVK_3LTR     | - |
| Pygathrix_nemaeus_ctg1        | 19745114 | 19745513 | HERVHF_5LTR    | - |
| Pygathrix_nemaeus_ctg1        | 19746040 | 19748412 | HERVHF_pol     | - |
| Pygathrix_nemaeus_ctg1        | 19749794 | 19750184 | HERVHF_3LTR    | - |
| Pygathrix_nemaeus_ctg1        | 28998574 | 28998946 | HERVHF_5LTR    | + |
| Pygathrix_nemaeus_ctg1        | 29001077 | 29001619 | HERVHF_pro     | + |
| Pygathrix_nemaeus_ctg1        | 29004813 | 29008975 | HERVHF_pol     | + |
| Pygathrix_nemaeus_ctg1        | 29010039 | 29010416 | HERVHF_3LTR    | + |
| Pygathrix_nemaeus_ctg108      | 5489385  | 5489773  | HERVHF_5LTR    | - |
| Pygathrix_nemaeus_ctg108      | 5490356  | 5492108  | HERVHF_pol     | - |
| Pygathrix_nemaeus_ctg108      | 5494850  | 5495244  | HERVHF_3LTR    | - |
| Pygathrix_nemaeus_ctg110      | 28428    | 28772    | HERVHF_5LTR    | + |
| Pygathrix_nemaeus_ctg110      | 30374    | 30697    | HERVHF_gag     | + |
| Pygathrix_nemaeus_ctg110      | 30756    | 31523    | HERVHF_pro     | + |
| Pygathrix_nemaeus_ctg110      | 30897    | 32934    | HERVHF_pol     | + |

|                          |          |          |             |   |
|--------------------------|----------|----------|-------------|---|
| Pygathrix_nemaeus_ctg110 | 33494    | 33828    | HERVHF_3LTR | + |
| Pygathrix_nemaeus_ctg113 | 462081   | 462384   | HERVHF_5LTR | + |
| Pygathrix_nemaeus_ctg113 | 463939   | 464646   | HERVHF_gag  | + |
| Pygathrix_nemaeus_ctg113 | 465185   | 467494   | HERVHF_pol  | + |
| Pygathrix_nemaeus_ctg113 | 471163   | 471469   | HERVHF_3LTR | + |
| Pygathrix_nemaeus_ctg115 | 1805092  | 1805561  | HERVK_5LTR  | + |
| Pygathrix_nemaeus_ctg115 | 1805741  | 1806568  | HERVK_gag   | + |
| Pygathrix_nemaeus_ctg115 | 1807234  | 1807916  | HERVK_pro   | + |
| Pygathrix_nemaeus_ctg115 | 1807779  | 1809762  | HERVK_pol   | + |
| Pygathrix_nemaeus_ctg115 | 1810986  | 1811431  | HERVK_3LTR  | + |
| Pygathrix_nemaeus_ctg16  | 2394005  | 2394454  | HERVHF_5LTR | - |
| Pygathrix_nemaeus_ctg16  | 2395144  | 2396763  | HERVHF_pol  | - |
| Pygathrix_nemaeus_ctg16  | 2398946  | 2399397  | HERVHF_3LTR | - |
| Pygathrix_nemaeus_ctg163 | 4572964  | 4573342  | HERVHF_5LTR | - |
| Pygathrix_nemaeus_ctg163 | 4573783  | 4577453  | HERVHF_pol  | - |
| Pygathrix_nemaeus_ctg163 | 4578760  | 4579059  | HERVHF_gag  | - |
| Pygathrix_nemaeus_ctg163 | 4580462  | 4580833  | HERVHF_3LTR | - |
| Pygathrix_nemaeus_ctg17  | 8238923  | 8239306  | HERVHF_5LTR | - |
| Pygathrix_nemaeus_ctg17  | 8240406  | 8241630  | HERVHF_pol  | - |
| Pygathrix_nemaeus_ctg17  | 8242077  | 8242400  | HERVHF_gag  | - |
| Pygathrix_nemaeus_ctg17  | 8244527  | 8244923  | HERVHF_3LTR | - |
| Pygathrix_nemaeus_ctg2   | 25877365 | 25877676 | HERVHF_5LTR | - |
| Pygathrix_nemaeus_ctg2   | 25878367 | 25880604 | HERVHF_pol  | - |
| Pygathrix_nemaeus_ctg2   | 25880044 | 25880805 | HERVHF_pro  | - |
| Pygathrix_nemaeus_ctg2   | 25880877 | 25881200 | HERVHF_gag  | - |
| Pygathrix_nemaeus_ctg2   | 25882894 | 25883213 | HERVHF_3LTR | - |
| Pygathrix_nemaeus_ctg21  | 23576327 | 23576837 | HERVK_5LTR  | - |
| Pygathrix_nemaeus_ctg21  | 23577046 | 23577348 | HERVK_env   | - |
| Pygathrix_nemaeus_ctg21  | 23578160 | 23579041 | HERVK_pol   | - |
| Pygathrix_nemaeus_ctg21  | 23578936 | 23579877 | HERVK_pro   | - |
| Pygathrix_nemaeus_ctg21  | 23581294 | 23581806 | HERVK_3LTR  | - |
| Pygathrix_nemaeus_ctg211 | 1610604  | 1610910  | HERVHF_5LTR | + |
| Pygathrix_nemaeus_ctg211 | 1615873  | 1616232  | HERVHF_gag  | + |
| Pygathrix_nemaeus_ctg211 | 1616878  | 1618937  | HERVHF_pol  | + |
| Pygathrix_nemaeus_ctg211 | 1619550  | 1619857  | HERVHF_3LTR | + |
| Pygathrix_nemaeus_ctg226 | 1472473  | 1472835  | HERVHF_5LTR | - |
| Pygathrix_nemaeus_ctg226 | 1473718  | 1475434  | HERVHF_pol  | - |
| Pygathrix_nemaeus_ctg226 | 1474778  | 1475611  | HERVHF_pro  | - |
| Pygathrix_nemaeus_ctg226 | 1477667  | 1478038  | HERVHF_3LTR | - |
| Pygathrix_nemaeus_ctg23  | 25316741 | 25317066 | HERVHF_5LTR | - |
| Pygathrix_nemaeus_ctg23  | 25317512 | 25319397 | HERVHF_pol  | - |
| Pygathrix_nemaeus_ctg23  | 25321879 | 25322201 | HERVHF_3LTR | - |
| Pygathrix_nemaeus_ctg23  | 30320113 | 30320464 | HERVK_5LTR  | - |
| Pygathrix_nemaeus_ctg23  | 30320599 | 30321029 | HERVK_env   | - |

|                          |          |          |             |   |
|--------------------------|----------|----------|-------------|---|
| Pygathrix_nemaeus_ctg23  | 30321446 | 30323336 | HERVK_pol   | - |
| Pygathrix_nemaeus_ctg23  | 30323255 | 30324168 | HERVK_pro   | - |
| Pygathrix_nemaeus_ctg23  | 30324158 | 30325362 | HERVK_gag   | - |
| Pygathrix_nemaeus_ctg23  | 30325903 | 30326248 | HERVK_3LTR  | - |
| Pygathrix_nemaeus_ctg241 | 1556338  | 1556673  | HERVHF_5LTR | + |
| Pygathrix_nemaeus_ctg241 | 1557899  | 1558420  | HERVHF_gag  | + |
| Pygathrix_nemaeus_ctg241 | 1558663  | 1561140  | HERVHF_pol  | + |
| Pygathrix_nemaeus_ctg241 | 1561725  | 1562070  | HERVHF_3LTR | + |
| Pygathrix_nemaeus_ctg30  | 1939142  | 1939581  | HERVHF_5LTR | + |
| Pygathrix_nemaeus_ctg30  | 1940897  | 1941298  | HERVHF_gag  | + |
| Pygathrix_nemaeus_ctg30  | 1941638  | 1942156  | HERVHF_pro  | + |
| Pygathrix_nemaeus_ctg30  | 1942110  | 1944118  | HERVHF_pol  | + |
| Pygathrix_nemaeus_ctg30  | 1944671  | 1945111  | HERVHF_3LTR | + |
| Pygathrix_nemaeus_ctg305 | 869606   | 870000   | HERVHF_5LTR | + |
| Pygathrix_nemaeus_ctg305 | 871562   | 871885   | HERVHF_gag  | + |
| Pygathrix_nemaeus_ctg305 | 872016   | 872765   | HERVHF_pro  | + |
| Pygathrix_nemaeus_ctg305 | 872106   | 874353   | HERVHF_pol  | + |
| Pygathrix_nemaeus_ctg305 | 875192   | 875590   | HERVHF_3LTR | + |
| Pygathrix_nemaeus_ctg31  | 3692842  | 3693199  | HERVHF_5LTR | + |
| Pygathrix_nemaeus_ctg31  | 3695136  | 3697085  | HERVHF_gag  | + |
| Pygathrix_nemaeus_ctg31  | 3697476  | 3699367  | HERVHF_pol  | + |
| Pygathrix_nemaeus_ctg31  | 3699868  | 3700242  | HERVHF_3LTR | + |
| Pygathrix_nemaeus_ctg339 | 454897   | 455221   | HERVK_5LTR  | + |
| Pygathrix_nemaeus_ctg339 | 456276   | 457217   | HERVK_pro   | + |
| Pygathrix_nemaeus_ctg339 | 457115   | 458387   | HERVK_pol   | + |
| Pygathrix_nemaeus_ctg339 | 459233   | 459557   | HERVK_3LTR  | + |
| Pygathrix_nemaeus_ctg35  | 16092793 | 16093180 | HERVK_5LTR  | - |
| Pygathrix_nemaeus_ctg35  | 16094799 | 16095941 | HERVK_pol   | - |
| Pygathrix_nemaeus_ctg35  | 16095925 | 16096788 | HERVK_pro   | - |
| Pygathrix_nemaeus_ctg35  | 16098229 | 16098608 | HERVK_3LTR  | - |
| Pygathrix_nemaeus_ctg37  | 782433   | 782863   | HERVHF_5LTR | - |
| Pygathrix_nemaeus_ctg37  | 783678   | 786044   | HERVHF_pol  | - |
| Pygathrix_nemaeus_ctg37  | 785634   | 786683   | HERVHF_pro  | - |
| Pygathrix_nemaeus_ctg37  | 786804   | 787151   | HERVHF_gag  | - |
| Pygathrix_nemaeus_ctg37  | 788625   | 789061   | HERVHF_3LTR | - |
| Pygathrix_nemaeus_ctg38  | 3876301  | 3876755  | HERVHF_5LTR | + |
| Pygathrix_nemaeus_ctg38  | 3884412  | 3884920  | HERVHF_gag  | + |
| Pygathrix_nemaeus_ctg38  | 3885037  | 3885429  | HERVHF_pro  | + |
| Pygathrix_nemaeus_ctg38  | 3885211  | 3887338  | HERVHF_pol  | + |
| Pygathrix_nemaeus_ctg38  | 3887994  | 3888450  | HERVHF_3LTR | + |
| Pygathrix_nemaeus_ctg39  | 21192755 | 21193190 | HERVHF_5LTR | - |
| Pygathrix_nemaeus_ctg39  | 21194184 | 21196108 | HERVHF_pol  | - |
| Pygathrix_nemaeus_ctg39  | 21196941 | 21197363 | HERVHF_pro  | - |
| Pygathrix_nemaeus_ctg39  | 21199232 | 21199665 | HERVHF_3LTR | - |

|                         |          |          |             |   |
|-------------------------|----------|----------|-------------|---|
| Pygathrix_nemaeus_ctg48 | 4365541  | 4366052  | HERVK_5LTR  | + |
| Pygathrix_nemaeus_ctg48 | 4366933  | 4367682  | HERVK_pro   | + |
| Pygathrix_nemaeus_ctg48 | 4367669  | 4369243  | HERVK_pol   | + |
| Pygathrix_nemaeus_ctg48 | 4370000  | 4370401  | HERVK_env   | + |
| Pygathrix_nemaeus_ctg48 | 4370473  | 4370982  | HERVK_3LTR  | + |
| Pygathrix_nemaeus_ctg48 | 12780885 | 12781300 | HERVHF_5LTR | + |
| Pygathrix_nemaeus_ctg48 | 12783611 | 12785951 | HERVHF_pol  | + |
| Pygathrix_nemaeus_ctg48 | 12786504 | 12786916 | HERVHF_3LTR | + |
| Pygathrix_nemaeus_ctg5  | 20242040 | 20242511 | HERVHF_5LTR | - |
| Pygathrix_nemaeus_ctg5  | 20243184 | 20244680 | HERVHF_pol  | - |
| Pygathrix_nemaeus_ctg5  | 20247311 | 20247783 | HERVHF_3LTR | - |
| Pygathrix_nemaeus_ctg5  | 37143667 | 37144124 | HERVHF_5LTR | - |
| Pygathrix_nemaeus_ctg5  | 37145349 | 37147374 | HERVHF_pol  | - |
| Pygathrix_nemaeus_ctg5  | 37146772 | 37147542 | HERVHF_pro  | - |
| Pygathrix_nemaeus_ctg5  | 37149511 | 37149966 | HERVHF_3LTR | - |
| Pygathrix_nemaeus_ctg6  | 45892642 | 45893020 | HERVHF_5LTR | + |
| Pygathrix_nemaeus_ctg6  | 45895423 | 45897494 | HERVHF_pol  | + |
| Pygathrix_nemaeus_ctg6  | 45898399 | 45898770 | HERVHF_3LTR | + |
| Pygathrix_nemaeus_ctg66 | 786716   | 787114   | HERVHF_5LTR | - |
| Pygathrix_nemaeus_ctg66 | 788625   | 789278   | HERVHF_pol  | - |
| Pygathrix_nemaeus_ctg66 | 788643   | 789380   | HERVHF_pro  | - |
| Pygathrix_nemaeus_ctg66 | 791494   | 791902   | HERVHF_3LTR | - |
| Pygathrix_nemaeus_ctg68 | 401930   | 402357   | HERVHF_5LTR | - |
| Pygathrix_nemaeus_ctg68 | 402526   | 403087   | HERVHF_env  | - |
| Pygathrix_nemaeus_ctg68 | 403113   | 405335   | HERVHF_pol  | - |
| Pygathrix_nemaeus_ctg68 | 407833   | 408263   | HERVHF_3LTR | - |
| Pygathrix_nemaeus_ctg69 | 2350823  | 2351153  | HERVHF_5LTR | - |
| Pygathrix_nemaeus_ctg69 | 2351953  | 2353494  | HERVHF_pol  | - |
| Pygathrix_nemaeus_ctg69 | 2354075  | 2354407  | HERVHF_gag  | - |
| Pygathrix_nemaeus_ctg69 | 2355943  | 2356286  | HERVHF_3LTR | - |
| Pygathrix_nemaeus_ctg69 | 9563253  | 9563704  | HERVHF_5LTR | - |
| Pygathrix_nemaeus_ctg69 | 9564303  | 9566097  | HERVHF_pol  | - |
| Pygathrix_nemaeus_ctg69 | 9565879  | 9566337  | HERVHF_pro  | - |
| Pygathrix_nemaeus_ctg69 | 9566566  | 9567105  | HERVHF_gag  | - |
| Pygathrix_nemaeus_ctg69 | 9568529  | 9568980  | HERVHF_3LTR | - |
| Pygathrix_nemaeus_ctg7  | 3060425  | 3060830  | HERVHF_5LTR | + |
| Pygathrix_nemaeus_ctg7  | 3062750  | 3063481  | HERVHF_pro  | + |
| Pygathrix_nemaeus_ctg7  | 3062915  | 3065385  | HERVHF_pol  | + |
| Pygathrix_nemaeus_ctg7  | 3065969  | 3066373  | HERVHF_3LTR | + |
| Pygathrix_nemaeus_ctg96 | 13417564 | 13417973 | HERVHF_5LTR | + |
| Pygathrix_nemaeus_ctg96 | 13420203 | 13421303 | HERVHF_pro  | + |
| Pygathrix_nemaeus_ctg96 | 13420326 | 13422523 | HERVHF_pol  | + |
| Pygathrix_nemaeus_ctg96 | 13423796 | 13424814 | HERVHF_env  | + |
| Pygathrix_nemaeus_ctg96 | 13425067 | 13425482 | HERVHF_3LTR | + |

|                                    |           |           |                |   |
|------------------------------------|-----------|-----------|----------------|---|
| Rhinopithecus_roxellana_CM017351.1 | 37053370  | 37053787  | HERVHF_5LTR    | + |
| Rhinopithecus_roxellana_CM017351.1 | 37062369  | 37062749  | HERVHF_pro     | + |
| Rhinopithecus_roxellana_CM017351.1 | 37063202  | 37064673  | HERVHF_pol     | + |
| Rhinopithecus_roxellana_CM017351.1 | 37065366  | 37065779  | HERVHF_3LTR    | + |
| Rhinopithecus_roxellana_CM017351.1 | 166950693 | 166951126 | HERVHF_5LTR    | - |
| Rhinopithecus_roxellana_CM017351.1 | 166951294 | 166951656 | HERVHF_env     | - |
| Rhinopithecus_roxellana_CM017351.1 | 166952042 | 166954042 | HERVHF_pol     | - |
| Rhinopithecus_roxellana_CM017351.1 | 166954471 | 166954908 | HERVHF_gag     | - |
| Rhinopithecus_roxellana_CM017351.1 | 166956456 | 166956887 | HERVHF_3LTR    | - |
| Rhinopithecus_roxellana_CM017351.1 | 199982959 | 199983452 | HERVK_5LTR     | - |
| Rhinopithecus_roxellana_CM017351.1 | 199983524 | 199984129 | HERVK_env      | - |
| Rhinopithecus_roxellana_CM017351.1 | 199984385 | 199986311 | HERVK_pol      | - |
| Rhinopithecus_roxellana_CM017351.1 | 199986209 | 199987135 | HERVK_pro      | - |
| Rhinopithecus_roxellana_CM017351.1 | 199987548 | 199988201 | HERVK_gag      | - |
| Rhinopithecus_roxellana_CM017351.1 | 199988598 | 199989070 | HERVK_3LTR     | - |
| Rhinopithecus_roxellana_CM017352.1 | 19640491  | 19640890  | HERVIPADP_5LTR | + |
| Rhinopithecus_roxellana_CM017352.1 | 19642811  | 19643155  | HERVIPADP_gag  | + |
| Rhinopithecus_roxellana_CM017352.1 | 19643834  | 19646467  | HERVIPADP_pol  | + |
| Rhinopithecus_roxellana_CM017352.1 | 19648550  | 19649005  | HERVIPADP_env  | + |
| Rhinopithecus_roxellana_CM017352.1 | 19649093  | 19649501  | HERVIPADP_3LTR | + |
| Rhinopithecus_roxellana_CM017352.1 | 145959206 | 145959580 | HERVHF_5LTR    | + |
| Rhinopithecus_roxellana_CM017352.1 | 145961505 | 145961840 | HERVHF_pro     | + |
| Rhinopithecus_roxellana_CM017352.1 | 145961965 | 145963824 | HERVHF_pol     | + |
| Rhinopithecus_roxellana_CM017352.1 | 145964712 | 145965097 | HERVHF_3LTR    | + |
| Rhinopithecus_roxellana_CM017353.1 | 130789883 | 130790213 | HERVHF_5LTR    | - |
| Rhinopithecus_roxellana_CM017353.1 | 130790820 | 130792769 | HERVHF_pol     | - |
| Rhinopithecus_roxellana_CM017353.1 | 130793124 | 130793459 | HERVHF_gag     | - |

|                                    |           |           |                |   |
|------------------------------------|-----------|-----------|----------------|---|
| Rhinopithecus_roxellana_CM017353.1 | 130795071 | 130795413 | HERVHF_3LTR    | - |
| Rhinopithecus_roxellana_CM017353.1 | 153331383 | 153331729 | HERVHF_5LTR    | + |
| Rhinopithecus_roxellana_CM017353.1 | 153333314 | 153333982 | HERVHF_gag     | + |
| Rhinopithecus_roxellana_CM017353.1 | 153334016 | 153334960 | HERVHF_pro     | + |
| Rhinopithecus_roxellana_CM017353.1 | 153334289 | 153336328 | HERVHF_pol     | + |
| Rhinopithecus_roxellana_CM017353.1 | 153338362 | 153339123 | HERVHF_env     | + |
| Rhinopithecus_roxellana_CM017353.1 | 153339396 | 153339722 | HERVHF_3LTR    | + |
| Rhinopithecus_roxellana_CM017354.1 | 24650323  | 24650719  | HERVIPADP_5LTR | - |
| Rhinopithecus_roxellana_CM017354.1 | 24650982  | 24651651  | HERVIPADP_env  | - |
| Rhinopithecus_roxellana_CM017354.1 | 24653443  | 24656674  | HERVIPADP_pol  | - |
| Rhinopithecus_roxellana_CM017354.1 | 24657295  | 24657657  | HERVIPADP_gag  | - |
| Rhinopithecus_roxellana_CM017354.1 | 24659249  | 24659650  | HERVIPADP_3LTR | - |
| Rhinopithecus_roxellana_CM017354.1 | 24740192  | 24740588  | HERVIPADP_5LTR | - |
| Rhinopithecus_roxellana_CM017354.1 | 24740897  | 24741220  | HERVIPADP_env  | - |
| Rhinopithecus_roxellana_CM017354.1 | 24743137  | 24746464  | HERVIPADP_pol  | - |
| Rhinopithecus_roxellana_CM017354.1 | 24747304  | 24747672  | HERVIPADP_gag  | - |
| Rhinopithecus_roxellana_CM017354.1 | 24749134  | 24749533  | HERVIPADP_3LTR | - |
| Rhinopithecus_roxellana_CM017354.1 | 24820325  | 24820666  | HERVIPADP_5LTR | - |
| Rhinopithecus_roxellana_CM017354.1 | 24820903  | 24821427  | HERVIPADP_env  | - |
| Rhinopithecus_roxellana_CM017354.1 | 24823268  | 24826905  | HERVIPADP_pol  | - |
| Rhinopithecus_roxellana_CM017354.1 | 24827424  | 24827729  | HERVIPADP_gag  | - |
| Rhinopithecus_roxellana_CM017354.1 | 24829279  | 24829616  | HERVIPADP_3LTR | - |
| Rhinopithecus_roxellana_CM017354.1 | 24902177  | 24902598  | HERVIPADP_5LTR | + |
| Rhinopithecus_roxellana_CM017354.1 | 24905720  | 24908767  | HERVIPADP_pol  | + |
| Rhinopithecus_roxellana_CM017354.1 | 24909987  | 24910520  | HERVIPADP_env  | + |
| Rhinopithecus_roxellana_CM017354.1 | 24911158  | 24911586  | HERVIPADP_3LTR | + |
| Rhinopithecus_roxellana_CM017354.1 | 142088755 | 142089134 | HERVHF_5LTR    | - |
| Rhinopithecus_roxellana_CM017354.1 | 142089977 | 142091931 | HERVHF_pol     | - |
| Rhinopithecus_roxellana_CM017354.1 | 142092099 | 142092527 | HERVHF_pro     | - |
| Rhinopithecus_roxellana_CM017354.1 | 142094615 | 142094999 | HERVHF_3LTR    | - |
| Rhinopithecus_roxellana_CM017355.1 | 102052399 | 102052736 | HERVHF_5LTR    | + |

|                                    |           |           |                |   |
|------------------------------------|-----------|-----------|----------------|---|
| Rhinopithecus_roxellana_CM017355.1 | 102054371 | 102054885 | HERVHF_gag     | + |
| Rhinopithecus_roxellana_CM017355.1 | 102054899 | 102055306 | HERVHF_pro     | + |
| Rhinopithecus_roxellana_CM017355.1 | 102055321 | 102056820 | HERVHF_pol     | + |
| Rhinopithecus_roxellana_CM017355.1 | 102057473 | 102057816 | HERVHF_3LTR    | + |
| Rhinopithecus_roxellana_CM017355.1 | 151120513 | 151120900 | HERVIPADP_5LTR | - |
| Rhinopithecus_roxellana_CM017355.1 | 151121366 | 151122556 | HERVIPADP_env  | - |
| Rhinopithecus_roxellana_CM017355.1 | 151123291 | 151126546 | HERVIPADP_pol  | - |
| Rhinopithecus_roxellana_CM017355.1 | 151127469 | 151127783 | HERVIPADP_gag  | - |
| Rhinopithecus_roxellana_CM017355.1 | 151129804 | 151130181 | HERVIPADP_3LTR | - |
| Rhinopithecus_roxellana_CM017355.1 | 159902419 | 159902821 | HERVHF_5LTR    | - |
| Rhinopithecus_roxellana_CM017355.1 | 159903410 | 159905832 | HERVHF_pol     | - |
| Rhinopithecus_roxellana_CM017355.1 | 159905314 | 159906030 | HERVHF_pro     | - |
| Rhinopithecus_roxellana_CM017355.1 | 159906087 | 159906497 | HERVHF_gag     | - |
| Rhinopithecus_roxellana_CM017355.1 | 159907963 | 159908363 | HERVHF_3LTR    | - |
| Rhinopithecus_roxellana_CM017356.1 | 136003041 | 136003542 | HERVHF_5LTR    | - |
| Rhinopithecus_roxellana_CM017356.1 | 136004616 | 136006201 | HERVHF_pol     | - |
| Rhinopithecus_roxellana_CM017356.1 | 136005659 | 136006315 | HERVHF_pro     | - |
| Rhinopithecus_roxellana_CM017356.1 | 136006506 | 136006892 | HERVHF_gag     | - |
| Rhinopithecus_roxellana_CM017356.1 | 136008454 | 136008954 | HERVHF_3LTR    | - |
| Rhinopithecus_roxellana_CM017357.1 | 9496050   | 9496409   | HERVHF_5LTR    | + |
| Rhinopithecus_roxellana_CM017357.1 | 9497876   | 9498208   | HERVHF_gag     | + |
| Rhinopithecus_roxellana_CM017357.1 | 9498638   | 9500859   | HERVHF_pol     | + |
| Rhinopithecus_roxellana_CM017357.1 | 9501446   | 9501808   | HERVHF_3LTR    | + |
| Rhinopithecus_roxellana_CM017357.1 | 21852345  | 21852762  | HERVHF_5LTR    | - |
| Rhinopithecus_roxellana_CM017357.1 | 21853511  | 21855498  | HERVHF_pol     | - |



|                                    |           |           |             |   |
|------------------------------------|-----------|-----------|-------------|---|
| Rhinopithecus_roxellana_CM017357.1 | 21854956  | 21855735  | HERVHF_pro  | - |
| Rhinopithecus_roxellana_CM017357.1 | 21857764  | 21858176  | HERVHF_3LTR | - |
| Rhinopithecus_roxellana_CM017357.1 | 101445362 | 101445820 | HERVHF_5LTR | - |
| Rhinopithecus_roxellana_CM017357.1 | 101448617 | 101450838 | HERVHF_pol  | - |
| Rhinopithecus_roxellana_CM017357.1 | 101451445 | 101451777 | HERVHF_gag  | - |
| Rhinopithecus_roxellana_CM017357.1 | 101453149 | 101453600 | HERVHF_3LTR | - |
| Rhinopithecus_roxellana_CM017358.1 | 77075684  | 77076195  | HERVK_5LTR  | - |
| Rhinopithecus_roxellana_CM017358.1 | 77076357  | 77076683  | HERVK_env   | - |
| Rhinopithecus_roxellana_CM017358.1 | 77077026  | 77078399  | HERVK_pol   | - |
| Rhinopithecus_roxellana_CM017358.1 | 77078294  | 77079235  | HERVK_pro   | - |
| Rhinopithecus_roxellana_CM017358.1 | 77080653  | 77081164  | HERVK_3LTR  | - |
| Rhinopithecus_roxellana_CM017358.1 | 87682269  | 87682617  | HERVHF_5LTR | - |
| Rhinopithecus_roxellana_CM017358.1 | 87685950  | 87686261  | HERVHF_env  | - |
| Rhinopithecus_roxellana_CM017358.1 | 87686542  | 87688929  | HERVHF_pol  | - |
| Rhinopithecus_roxellana_CM017358.1 | 87689350  | 87689709  | HERVHF_gag  | - |
| Rhinopithecus_roxellana_CM017358.1 | 87691248  | 87691582  | HERVHF_3LTR | - |
| Rhinopithecus_roxellana_CM017358.1 | 125216180 | 125216685 | HERVK_5LTR  | - |
| Rhinopithecus_roxellana_CM017358.1 | 125216766 | 125217109 | HERVK_env   | - |
| Rhinopithecus_roxellana_CM017358.1 | 125217787 | 125219438 | HERVK_pol   | - |
| Rhinopithecus_roxellana_CM017358.1 | 125219377 | 125220174 | HERVK_pro   | - |
| Rhinopithecus_roxellana_CM017358.1 | 125221652 | 125222155 | HERVK_3LTR  | - |
| Rhinopithecus_roxellana_CM017359.1 | 12300365  | 12300681  | HERVHF_5LTR | - |
| Rhinopithecus_roxellana_CM017359.1 | 12301252  | 12303888  | HERVHF_pol  | - |
| Rhinopithecus_roxellana_CM017359.1 | 12303961  | 12304392  | HERVHF_pro  | - |
| Rhinopithecus_roxellana_CM017359.1 | 12304382  | 12304945  | HERVHF_gag  | - |
| Rhinopithecus_roxellana_CM017359.1 | 12306389  | 12306702  | HERVHF_3LTR | - |
| Rhinopithecus_roxellana_CM017359.1 | 24633285  | 24633644  | HERVHF_5LTR | + |
| Rhinopithecus_roxellana_CM017359.1 | 24635053  | 24635592  | HERVHF_gag  | + |
| Rhinopithecus_roxellana_CM017359.1 | 24636051  | 24636614  | HERVHF_pol  | + |
| Rhinopithecus_roxellana_CM017359.1 | 24637292  | 24637807  | HERVHF_env  | + |
| Rhinopithecus_roxellana_CM017359.1 | 24638062  | 24638422  | HERVHF_3LTR | + |
| Rhinopithecus_roxellana_CM017359.1 | 66897537  | 66897943  | HERVHF_5LTR | - |
| Rhinopithecus_roxellana_CM017359.1 | 66898098  | 66898703  | HERVHF_env  | - |
| Rhinopithecus_roxellana_CM017359.1 | 66898848  | 66901059  | HERVHF_pol  | - |
| Rhinopithecus_roxellana_CM017359.1 | 66901830  | 66902255  | HERVHF_gag  | - |

|                                    |           |           |             |   |
|------------------------------------|-----------|-----------|-------------|---|
| Rhinopithecus_roxellana_CM017359.1 | 66903626  | 66904040  | HERVHF_3LTR | - |
| Rhinopithecus_roxellana_CM017359.1 | 126642271 | 126642581 | HERVHF_5LTR | + |
| Rhinopithecus_roxellana_CM017359.1 | 126645770 | 126646504 | HERVHF_pro  | + |
| Rhinopithecus_roxellana_CM017359.1 | 126645980 | 126647315 | HERVHF_pol  | + |
| Rhinopithecus_roxellana_CM017359.1 | 126647888 | 126648202 | HERVHF_3LTR | + |
| Rhinopithecus_roxellana_CM017361.1 | 9027166   | 9027497   | HERVHF_5LTR | - |
| Rhinopithecus_roxellana_CM017361.1 | 9028554   | 9030637   | HERVHF_pol  | - |
| Rhinopithecus_roxellana_CM017361.1 | 9033686   | 9034011   | HERVHF_3LTR | - |
| Rhinopithecus_roxellana_CM017361.1 | 62205482  | 62205907  | HERVHF_5LTR | - |
| Rhinopithecus_roxellana_CM017361.1 | 62206076  | 62206471  | HERVHF_env  | - |
| Rhinopithecus_roxellana_CM017361.1 | 62206749  | 62210279  | HERVHF_pol  | - |
| Rhinopithecus_roxellana_CM017361.1 | 62209982  | 62210782  | HERVHF_pro  | - |
| Rhinopithecus_roxellana_CM017361.1 | 62210846  | 62211175  | HERVHF_gag  | - |
| Rhinopithecus_roxellana_CM017361.1 | 62213257  | 62213685  | HERVHF_3LTR | - |
| Rhinopithecus_roxellana_CM017362.1 | 94016823  | 94017346  | HERVK_5LTR  | - |
| Rhinopithecus_roxellana_CM017362.1 | 94018104  | 94020047  | HERVK_pol   | - |
| Rhinopithecus_roxellana_CM017362.1 | 94019942  | 94020884  | HERVK_pro   | - |
| Rhinopithecus_roxellana_CM017362.1 | 94021259  | 94021912  | HERVK_gag   | - |
| Rhinopithecus_roxellana_CM017362.1 | 94022288  | 94022812  | HERVK_3LTR  | - |
| Rhinopithecus_roxellana_CM017362.1 | 106138084 | 106138444 | HERVHF_5LTR | - |
| Rhinopithecus_roxellana_CM017362.1 | 106138671 | 106139066 | HERVHF_env  | - |
| Rhinopithecus_roxellana_CM017362.1 | 106139112 | 106141673 | HERVHF_pol  | - |
| Rhinopithecus_roxellana_CM017362.1 | 106143180 | 106143533 | HERVHF_3LTR | - |
| Rhinopithecus_roxellana_CM017363.1 | 80905082  | 80905534  | HERVHF_5LTR | + |
| Rhinopithecus_roxellana_CM017363.1 | 80907220  | 80907543  | HERVHF_gag  | + |
| Rhinopithecus_roxellana_CM017363.1 | 80907533  | 80908390  | HERVHF_pro  | + |
| Rhinopithecus_roxellana_CM017363.1 | 80907737  | 80909478  | HERVHF_pol  | + |
| Rhinopithecus_roxellana_CM017363.1 | 80910307  | 80910764  | HERVHF_3LTR | + |
| Rhinopithecus_roxellana_CM017364.1 | 43303717  | 43304033  | HERVHF_5LTR | - |
| Rhinopithecus_roxellana_CM017364.1 | 43306724  | 43308400  | HERVHF_pol  | - |
| Rhinopithecus_roxellana_CM017364.1 | 43309018  | 43309317  | HERVHF_gag  | - |
| Rhinopithecus_roxellana_CM017364.1 | 43315327  | 43315645  | HERVHF_3LTR | - |
| Rhinopithecus_roxellana_CM017364.1 | 52883002  | 52883366  | HERVHF_5LTR | + |
| Rhinopithecus_roxellana_CM017364.1 | 52884056  | 52885543  | HERVHF_gag  | + |
| Rhinopithecus_roxellana_CM017364.1 | 52885559  | 52886053  | HERVHF_pro  | + |
| Rhinopithecus_roxellana_CM017364.1 | 52885960  | 52888006  | HERVHF_pol  | + |

|                                    |           |           |             |   |
|------------------------------------|-----------|-----------|-------------|---|
| Rhinopithecus_roxellana_CM017364.1 | 52888880  | 52889260  | HERVHF_3LTR | + |
| Rhinopithecus_roxellana_CM017364.1 | 73018178  | 73018538  | HERVHF_5LTR | - |
| Rhinopithecus_roxellana_CM017364.1 | 73019210  | 73020929  | HERVHF_pol  | - |
| Rhinopithecus_roxellana_CM017364.1 | 73020390  | 73021139  | HERVHF_pro  | - |
| Rhinopithecus_roxellana_CM017364.1 | 73021222  | 73021545  | HERVHF_gag  | - |
| Rhinopithecus_roxellana_CM017364.1 | 73023848  | 73024189  | HERVHF_3LTR | - |
| Rhinopithecus_roxellana_CM017364.1 | 134810665 | 134811134 | HERVK_5LTR  | + |
| Rhinopithecus_roxellana_CM017364.1 | 134811656 | 134812132 | HERVK_gag   | + |
| Rhinopithecus_roxellana_CM017364.1 | 134812613 | 134813689 | HERVK_pro   | + |
| Rhinopithecus_roxellana_CM017364.1 | 134813351 | 134815334 | HERVK_pol   | + |
| Rhinopithecus_roxellana_CM017364.1 | 134816562 | 134817007 | HERVK_3LTR  | + |
| Rhinopithecus_roxellana_CM017365.1 | 24854630  | 24855030  | HERVHF_5LTR | - |
| Rhinopithecus_roxellana_CM017365.1 | 24855640  | 24858020  | HERVHF_pol  | - |
| Rhinopithecus_roxellana_CM017365.1 | 24859394  | 24859784  | HERVHF_3LTR | - |
| Rhinopithecus_roxellana_CM017366.1 | 82577437  | 82577879  | HERVHF_5LTR | - |
| Rhinopithecus_roxellana_CM017366.1 | 82578433  | 82580464  | HERVHF_pol  | - |
| Rhinopithecus_roxellana_CM017366.1 | 82580395  | 82580916  | HERVHF_pro  | - |
| Rhinopithecus_roxellana_CM017366.1 | 82581319  | 82581693  | HERVHF_gag  | - |
| Rhinopithecus_roxellana_CM017366.1 | 82582964  | 82583401  | HERVHF_3LTR | - |
| Rhinopithecus_roxellana_CM017366.1 | 86961154  | 86961488  | HERVHF_5LTR | + |
| Rhinopithecus_roxellana_CM017366.1 | 86963568  | 86964140  | HERVHF_pro  | + |
| Rhinopithecus_roxellana_CM017366.1 | 86964288  | 86967329  | HERVHF_pol  | + |
| Rhinopithecus_roxellana_CM017366.1 | 86968368  | 86968796  | HERVHF_env  | + |
| Rhinopithecus_roxellana_CM017366.1 | 86969599  | 86969930  | HERVHF_3LTR | + |
| Rhinopithecus_roxellana_CM017367.1 | 39471830  | 39472205  | HERVHF_5LTR | + |
| Rhinopithecus_roxellana_CM017367.1 | 39473103  | 39475026  | HERVHF_pol  | + |
| Rhinopithecus_roxellana_CM017367.1 | 39475687  | 39476067  | HERVHF_3LTR | + |
| Rhinopithecus_roxellana_CM017367.1 | 100255651 | 100256167 | HERVHF_5LTR | + |
| Rhinopithecus_roxellana_CM017367.1 | 100257364 | 100258298 | HERVHF_gag  | + |
| Rhinopithecus_roxellana_CM017367.1 | 100260176 | 100260799 | HERVHF_pro  | + |
| Rhinopithecus_roxellana_CM017367.1 | 100260224 | 100262814 | HERVHF_pol  | + |
| Rhinopithecus_roxellana_CM017367.1 | 100264623 | 100265054 | HERVHF_env  | + |
| Rhinopithecus_roxellana_CM017367.1 | 100265600 | 100266122 | HERVHF_3LTR | + |

|                                        |           |           |                |   |
|----------------------------------------|-----------|-----------|----------------|---|
| Rhinopithecus_roxellana_CM017367.1     | 111245993 | 111246358 | HERVHF_5LTR    | + |
| Rhinopithecus_roxellana_CM017367.1     | 111251156 | 111251557 | HERVHF_gag     | + |
| Rhinopithecus_roxellana_CM017367.1     | 111251631 | 111252695 | HERVHF_pro     | + |
| Rhinopithecus_roxellana_CM017367.1     | 111252153 | 111254388 | HERVHF_pol     | + |
| Rhinopithecus_roxellana_CM017367.1     | 111254827 | 111255187 | HERVHF_3LTR    | + |
| Rhinopithecus_roxellana_CM017368.1     | 43723454  | 43723812  | HERVHF_5LTR    | + |
| Rhinopithecus_roxellana_CM017368.1     | 43725359  | 43725700  | HERVHF_gag     | + |
| Rhinopithecus_roxellana_CM017368.1     | 43725849  | 43726598  | HERVHF_pro     | + |
| Rhinopithecus_roxellana_CM017368.1     | 43726038  | 43727568  | HERVHF_pol     | + |
| Rhinopithecus_roxellana_CM017368.1     | 43728715  | 43729073  | HERVHF_3LTR    | + |
| Rhinopithecus_roxellana_CM017369.1     | 20543195  | 20543519  | HERVK_5LTR     | - |
| Rhinopithecus_roxellana_CM017369.1     | 20544369  | 20545640  | HERVK_pol      | - |
| Rhinopithecus_roxellana_CM017369.1     | 20545535  | 20546476  | HERVK_pro      | - |
| Rhinopithecus_roxellana_CM017369.1     | 20547532  | 20547856  | HERVK_3LTR     | - |
| Rhinopithecus_roxellana_CM017369.1     | 41016707  | 41017121  | HERVHF_5LTR    | - |
| Rhinopithecus_roxellana_CM017369.1     | 41017845  | 41018971  | HERVHF_env     | - |
| Rhinopithecus_roxellana_CM017369.1     | 41020352  | 41021359  | HERVHF_pol     | - |
| Rhinopithecus_roxellana_CM017369.1     | 41021137  | 41022351  | HERVHF_pro     | - |
| Rhinopithecus_roxellana_CM017369.1     | 41024586  | 41024996  | HERVHF_3LTR    | - |
| Rhinopithecus_roxellana_CM017371.1     | 16215279  | 16215730  | HERVHF_5LTR    | + |
| Rhinopithecus_roxellana_CM017371.1     | 16218266  | 16219759  | HERVHF_pol     | + |
| Rhinopithecus_roxellana_CM017371.1     | 16220446  | 16220897  | HERVHF_3LTR    | + |
| Rhinopithecus_roxellana_CM017372.1     | 8724440   | 8725085   | HERVK_5LTR     | + |
| Rhinopithecus_roxellana_CM017372.1     | 8725973   | 8727214   | HERVK_gag      | + |
| Rhinopithecus_roxellana_CM017372.1     | 8727096   | 8727686   | HERVK_pro      | + |
| Rhinopithecus_roxellana_CM017372.1     | 8727942   | 8730517   | HERVK_pol      | + |
| Rhinopithecus_roxellana_CM017372.1     | 8731377   | 8732288   | HERVK_env      | + |
| Rhinopithecus_roxellana_CM017372.1     | 8732793   | 8733436   | HERVK_3LTR     | + |
| Rhinopithecus_roxellana_VMRL01001680.1 | 27861     | 28450     | HERVHF_5LTR    | - |
| Rhinopithecus_roxellana_VMRL01001680.1 | 33276     | 33722     | HERVHF_env     | - |
| Rhinopithecus_roxellana_VMRL01001680.1 | 35511     | 37395     | HERVHF_pol     | - |
| Rhinopithecus_roxellana_VMRL01001680.1 | 41626     | 42204     | HERVHF_3LTR    | - |
| Rhinopithecus_strykeri_ctg10           | 19645487  | 19645886  | HERVIPADP_5LTR | + |
| Rhinopithecus_strykeri_ctg10           | 19647804  | 19648148  | HERVIPADP_gag  | + |
| Rhinopithecus_strykeri_ctg10           | 19648824  | 19651337  | HERVIPADP_pol  | + |
| Rhinopithecus_strykeri_ctg10           | 19653543  | 19653998  | HERVIPADP_env  | + |
| Rhinopithecus_strykeri_ctg10           | 19654084  | 19654492  | HERVIPADP_3LTR | + |

|                                       |          |                |   |
|---------------------------------------|----------|----------------|---|
| Rhinopithecus_strykeri_ctg10414790009 | 14790315 | HERVHF_5LTR    | + |
| Rhinopithecus_strykeri_ctg10414793089 | 14793469 | HERVHF_gag     | + |
| Rhinopithecus_strykeri_ctg10414793583 | 14794347 | HERVHF_pro     | + |
| Rhinopithecus_strykeri_ctg10414793817 | 14795531 | HERVHF_pol     | + |
| Rhinopithecus_strykeri_ctg10414798490 | 14798796 | HERVHF_3LTR    | + |
| Rhinopithecus_strykeri_ctg11054169    | 54581    | HERVIPADP_5LTR | + |
| Rhinopithecus_strykeri_ctg11057436    | 61059    | HERVIPADP_pol  | + |
| Rhinopithecus_strykeri_ctg11062252    | 62785    | HERVIPADP_env  | + |
| Rhinopithecus_strykeri_ctg11063439    | 63856    | HERVIPADP_3LTR | + |
| Rhinopithecus_strykeri_ctg12_4528512  | 4528865  | HERVHF_5LTR    | + |
| Rhinopithecus_strykeri_ctg12_4530394  | 4530726  | HERVHF_gag     | + |
| Rhinopithecus_strykeri_ctg12_4531059  | 4533481  | HERVHF_pol     | + |
| Rhinopithecus_strykeri_ctg12_4534105  | 4534459  | HERVHF_3LTR    | + |
| Rhinopithecus_strykeri_ctg12_13363594 | 13363970 | HERVIPADP_5LTR | + |
| Rhinopithecus_strykeri_ctg12_13365993 | 13366307 | HERVIPADP_gag  | + |
| Rhinopithecus_strykeri_ctg12_13367265 | 13370484 | HERVIPADP_pol  | + |
| Rhinopithecus_strykeri_ctg12_13371774 | 13372316 | HERVIPADP_env  | + |
| Rhinopithecus_strykeri_ctg12_13372864 | 13373253 | HERVIPADP_3LTR | + |
| Rhinopithecus_strykeri_ctg12111087871 | 11088195 | HERVK_5LTR     | + |
| Rhinopithecus_strykeri_ctg12111089290 | 11090204 | HERVK_pro      | + |
| Rhinopithecus_strykeri_ctg12111090099 | 11091374 | HERVK_pol      | + |
| Rhinopithecus_strykeri_ctg12111092221 | 11092545 | HERVK_3LTR     | + |
| Rhinopithecus_strykeri_ctg1398171654  | 8171988  | HUERSP_5LTR    | - |
| Rhinopithecus_strykeri_ctg1398177915  | 8179051  | HUERSP_pol     | - |
| Rhinopithecus_strykeri_ctg1398182242  | 8182579  | HUERSP_3LTR    | - |
| Rhinopithecus_strykeri_ctg1532100665  | 2101137  | HERVK_5LTR     | + |
| Rhinopithecus_strykeri_ctg1532101549  | 2102202  | HERVK_gag      | + |
| Rhinopithecus_strykeri_ctg1532102615  | 2103544  | HERVK_pro      | + |
| Rhinopithecus_strykeri_ctg1532103439  | 2105365  | HERVK_pol      | + |
| Rhinopithecus_strykeri_ctg1532105621  | 2106226  | HERVK_env      | + |
| Rhinopithecus_strykeri_ctg1532106296  | 2106789  | HERVK_3LTR     | + |
| Rhinopithecus_strykeri_ctg17_2230803  | 2231314  | HERVK_5LTR     | + |
| Rhinopithecus_strykeri_ctg17_2232739  | 2233674  | HERVK_pro      | + |
| Rhinopithecus_strykeri_ctg17_2233572  | 2234450  | HERVK_pol      | + |
| Rhinopithecus_strykeri_ctg17_2235256  | 2235618  | HERVK_env      | + |
| Rhinopithecus_strykeri_ctg17_2235772  | 2236283  | HERVK_3LTR     | + |
| Rhinopithecus_strykeri_ctg187508685   | 508999   | HERVIPADP_5LTR | + |
| Rhinopithecus_strykeri_ctg187510830   | 511243   | HERVIPADP_gag  | + |
| Rhinopithecus_strykeri_ctg187512031   | 514890   | HERVIPADP_pol  | + |
| Rhinopithecus_strykeri_ctg187516118   | 516543   | HERVIPADP_env  | + |
| Rhinopithecus_strykeri_ctg187517125   | 517432   | HERVIPADP_3LTR | + |
| Rhinopithecus_strykeri_ctg2861589829  | 1590131  | HERVK_5LTR     | - |
| Rhinopithecus_strykeri_ctg2861590379  | 1590948  | HERVK_env      | - |
| Rhinopithecus_strykeri_ctg2861590974  | 1591801  | HERVK_pol      | - |

|                                      |           |                         |   |
|--------------------------------------|-----------|-------------------------|---|
| Rhinopithecus_strykeri_ctg2861591696 | 1592625   | HERVK_pro               | - |
| Rhinopithecus_strykeri_ctg2861594068 | 1594373   | HERVK_3LTR              | - |
| Rhinopithecus_strykeri_ctg29122411   | 22828     | HERVHF_5LTR             | - |
| Rhinopithecus_strykeri_ctg29123768   | 25602     | HERVHF_pol              | - |
| Rhinopithecus_strykeri_ctg29125021   | 25800     | HERVHF_pro              | - |
| Rhinopithecus_strykeri_ctg29128415   | 28828     | HERVHF_3LTR             | - |
| Rhinopithecus_strykeri_ctg43         | 10408784  | 10409237 HERVHF_5LTR    | + |
| Rhinopithecus_strykeri_ctg43         | 10410181  | 10412348 HERVHF_gag     | + |
| Rhinopithecus_strykeri_ctg43         | 10412820  | 10414349 HERVHF_pol     | + |
| Rhinopithecus_strykeri_ctg43         | 10415199  | 10415653 HERVHF_3LTR    | + |
| Rhinopithecus_strykeri_ctg47         | 12017831  | 12018152 HERVIPADP_5LTR | - |
| Rhinopithecus_strykeri_ctg47         | 12018381  | 12019330 HERVIPADP_env  | - |
| Rhinopithecus_strykeri_ctg47         | 12020363  | 12024057 HERVIPADP_pol  | - |
| Rhinopithecus_strykeri_ctg47         | 12024543  | 12024860 HERVIPADP_gag  | - |
| Rhinopithecus_strykeri_ctg47         | 12026360  | 12026687 HERVIPADP_3LTR | - |
| Rhinopithecus_strykeri_ctg6          | 20338313  | 20338770 HERVHF_5LTR    | - |
| Rhinopithecus_strykeri_ctg6          | 20339559  | 20341975 HERVHF_pol     | - |
| Rhinopithecus_strykeri_ctg6          | 20341412  | 20342212 HERVHF_pro     | - |
| Rhinopithecus_strykeri_ctg6          | 20344307  | 20344762 HERVHF_3LTR    | - |
| Rhinopithecus_strykeri_ctg7          | 35211119  | 35211550 HERVHF_5LTR    | + |
| Rhinopithecus_strykeri_ctg7          | 35213100  | 35213540 HERVHF_gag     | + |
| Rhinopithecus_strykeri_ctg7          | 35213966  | 35215964 HERVHF_pol     | + |
| Rhinopithecus_strykeri_ctg7          | 35216327  | 35216710 HERVHF_env     | + |
| Rhinopithecus_strykeri_ctg7          | 35216876  | 35217309 HERVHF_3LTR    | + |
| Rhinopithecus_strykeri_ctg72         | 1420067   | 1420427 HERVHF_5LTR     | - |
| Rhinopithecus_strykeri_ctg72         | 1421011   | 1422959 HERVHF_pol      | - |
| Rhinopithecus_strykeri_ctg72         | 1422579   | 1423205 HERVHF_pro      | - |
| Rhinopithecus_strykeri_ctg72         | 1423658   | 1424617 HERVHF_gag      | - |
| Rhinopithecus_strykeri_ctg72         | 1428864   | 1429229 HERVHF_3LTR     | - |
| Rhinopithecus_strykeri_ctg9          | 14146116  | 14146527 HERVHF_5LTR    | - |
| Rhinopithecus_strykeri_ctg9          | 14147160  | 14149676 HERVHF_pol     | - |
| Rhinopithecus_strykeri_ctg9          | 14149017  | 14149718 HERVHF_pro     | - |
| Rhinopithecus_strykeri_ctg9          | 14149885  | 14150283 HERVHF_gag     | - |
| Rhinopithecus_strykeri_ctg9          | 14151615  | 14152027 HERVHF_3LTR    | - |
| Saguinus_midas_LG02                  | 71916510  | 71916833 HUERSP_5LTR    | + |
| Saguinus_midas_LG02                  | 71919127  | 71919558 HUERSP_gag     | + |
| Saguinus_midas_LG02                  | 71920084  | 71920716 HUERSP_pro     | + |
| Saguinus_midas_LG02                  | 71920135  | 71922669 HUERSP_pol     | + |
| Saguinus_midas_LG02                  | 71923503  | 71923907 HUERSP_env     | + |
| Saguinus_midas_LG02                  | 71924435  | 71924758 HUERSP_3LTR    | + |
| Saguinus_midas_LG02                  | 139088051 | 139088399 HERVHF_5LTR   | + |
| Saguinus_midas_LG02                  | 139090100 | 139090513 HERVHF_gag    | + |
| Saguinus_midas_LG02                  | 139091389 | 139092408 HERVHF_pro    | + |
| Saguinus_midas_LG02                  | 139091767 | 139094333 HERVHF_pol    | + |

|                      |           |           |             |   |
|----------------------|-----------|-----------|-------------|---|
| Saguinus_midas_LG02  | 139095784 | 139096542 | HERVHF_env  | + |
| Saguinus_midas_LG02  | 139097049 | 139097415 | HERVHF_3LTR | + |
| Saguinus_midas_LG03  | 38985829  | 38986385  | HERVHF_5LTR | - |
| Saguinus_midas_LG03  | 38988434  | 38990856  | HERVHF_pol  | - |
| Saguinus_midas_LG03  | 38991560  | 38992549  | HERVHF_gag  | - |
| Saguinus_midas_LG03  | 38993560  | 38994107  | HERVHF_3LTR | - |
| Saguinus_midas_LG06  | 46422988  | 46423408  | HERVHF_5LTR | - |
| Saguinus_midas_LG06  | 46426382  | 46428188  | HERVHF_pol  | - |
| Saguinus_midas_LG06  | 46427863  | 46428414  | HERVHF_pro  | - |
| Saguinus_midas_LG06  | 46428775  | 46430254  | HERVHF_gag  | - |
| Saguinus_midas_LG06  | 46430670  | 46431082  | HERVHF_3LTR | - |
| Saguinus_midas_LG08  | 65080925  | 65081250  | HERVHF_5LTR | + |
| Saguinus_midas_LG08  | 65082955  | 65083377  | HERVHF_pro  | + |
| Saguinus_midas_LG08  | 65083418  | 65084724  | HERVHF_pol  | + |
| Saguinus_midas_LG08  | 65086299  | 65086898  | HERVHF_env  | + |
| Saguinus_midas_LG08  | 65087121  | 65087444  | HERVHF_3LTR | + |
| Saguinus_midas_LG09  | 88042686  | 88043122  | HERVHF_5LTR | + |
| Saguinus_midas_LG09  | 88044356  | 88044748  | HERVHF_gag  | + |
| Saguinus_midas_LG09  | 88045536  | 88045981  | HERVHF_pol  | + |
| Saguinus_midas_LG09  | 88046648  | 88047067  | HERVHF_3LTR | + |
| Saguinus_midas_LG10  | 40013594  | 40013976  | HERVHF_5LTR | + |
| Saguinus_midas_LG10  | 40016142  | 40018277  | HERVHF_pol  | + |
| Saguinus_midas_LG10  | 40019309  | 40019992  | HERVHF_env  | + |
| Saguinus_midas_LG10  | 40020370  | 40020741  | HERVHF_3LTR | + |
| Saguinus_midas_LG11  | 23650294  | 23650652  | HERVHF_5LTR | + |
| Saguinus_midas_LG11  | 23651577  | 23652164  | HERVHF_gag  | + |
| Saguinus_midas_LG11  | 23653247  | 23654098  | HERVHF_pol  | + |
| Saguinus_midas_LG11  | 23657929  | 23658286  | HERVHF_3LTR | + |
| Saguinus_midas_LG11  | 126306948 | 126307292 | HERVHF_5LTR | - |
| Saguinus_midas_LG11  | 126310312 | 126312165 | HERVHF_pol  | - |
| Saguinus_midas_LG11  | 126314615 | 126314971 | HERVHF_3LTR | - |
| Saguinus_midas_LG19  | 39682326  | 39682643  | HERVHF_5LTR | + |
| Saguinus_midas_LG19  | 39684065  | 39684586  | HERVHF_gag  | + |
| Saguinus_midas_LG19  | 39685018  | 39687876  | HERVHF_pol  | + |
| Saguinus_midas_LG19  | 39685018  | 39685614  | HERVHF_pro  | + |
| Saguinus_midas_LG19  | 39690069  | 39690386  | HERVHF_3LTR | + |
| Saguinus_midas_LG20  | 26428222  | 26428650  | HERVHF_5LTR | - |
| Saguinus_midas_LG20  | 26430428  | 26433467  | HERVHF_pol  | - |
| Saguinus_midas_LG20  | 26433099  | 26433437  | HERVHF_pro  | - |
| Saguinus_midas_LG20  | 26435901  | 26436319  | HERVHF_3LTR | - |
| Sapajus_apella_ctg70 | 6148497   | 6148922   | HERVHF_5LTR | - |
| Sapajus_apella_ctg70 | 6150357   | 6151376   | HERVHF_pol  | - |
| Sapajus_apella_ctg70 | 6152122   | 6152775   | HERVHF_gag  | - |
| Sapajus_apella_ctg70 | 6154384   | 6154811   | HERVHF_3LTR | - |

|                                      |          |          |             |   |
|--------------------------------------|----------|----------|-------------|---|
| Symphalangus_syndactylus_tarseq_0    | 13518898 | 13519207 | HERVHF_5LTR | - |
| Symphalangus_syndactylus_tarseq_0    | 13522442 | 13523296 | HERVHF_pol  | - |
| Symphalangus_syndactylus_tarseq_0    | 13525778 | 13526088 | HERVHF_3LTR | - |
| Symphalangus_syndactylus_tarseq_101  | 5859844  | 5860253  | HERVHF_5LTR | + |
| Symphalangus_syndactylus_tarseq_101  | 5862769  | 5864644  | HERVHF_pol  | + |
| Symphalangus_syndactylus_tarseq_101  | 5865079  | 5865490  | HERVHF_3LTR | + |
| Symphalangus_syndactylus_tarseq_12   | 5637548  | 5637877  | HERVHF_5LTR | + |
| Symphalangus_syndactylus_tarseq_12   | 5639646  | 5640179  | HERVHF_gag  | + |
| Symphalangus_syndactylus_tarseq_12   | 5640272  | 5640691  | HERVHF_pro  | + |
| Symphalangus_syndactylus_tarseq_12   | 5640517  | 5643060  | HERVHF_pol  | + |
| Symphalangus_syndactylus_tarseq_12   | 5643722  | 5644066  | HERVHF_3LTR | + |
| Symphalangus_syndactylus_tarseq_1272 | 20257892 | 20258265 | HERVHF_5LTR | + |
| Symphalangus_syndactylus_tarseq_1272 | 20260004 | 20260312 | HERVHF_gag  | + |
| Symphalangus_syndactylus_tarseq_1272 | 20260316 | 20261155 | HERVHF_pro  | + |
| Symphalangus_syndactylus_tarseq_1272 | 20260520 | 20261959 | HERVHF_pol  | + |
| Symphalangus_syndactylus_tarseq_1272 | 20263142 | 20263515 | HERVHF_3LTR | + |
| Symphalangus_syndactylus_tarseq_1273 | 9619974  | 9620387  | HERVHF_5LTR | - |
| Symphalangus_syndactylus_tarseq_1273 | 9620805  | 9622948  | HERVHF_pol  | - |
| Symphalangus_syndactylus_tarseq_1273 | 9622337  | 9623113  | HERVHF_pro  | - |
| Symphalangus_syndactylus_tarseq_1273 | 9625265  | 9625681  | HERVHF_3LTR | - |
| Symphalangus_syndactylus_tarseq_1274 | 5037850  | 5038263  | HERVHF_5LTR | - |
| Symphalangus_syndactylus_tarseq_1274 | 5039035  | 5041871  | HERVHF_pol  | - |
| Symphalangus_syndactylus_tarseq_1274 | 5041332  | 5041919  | HERVHF_pro  | - |
| Symphalangus_syndactylus_tarseq_1274 | 5042164  | 5042493  | HERVHF_gag  | - |
| Symphalangus_syndactylus_tarseq_1274 | 5044181  | 5044598  | HERVHF_3LTR | - |
| Symphalangus_syndactylus_tarseq_1278 | 11350225 | 11350657 | HERVHF_5LTR | + |
| Symphalangus_syndactylus_tarseq_1278 | 11352590 | 11353417 | HERVHF_pro  | + |
| Symphalangus_syndactylus_tarseq_1278 | 11353055 | 11353594 | HERVHF_pol  | + |
| Symphalangus_syndactylus_tarseq_1278 | 11355697 | 11356128 | HERVHF_3LTR | + |
| Symphalangus_syndactylus_tarseq_1280 | 5604859  | 5605309  | HERVHF_5LTR | - |
| Symphalangus_syndactylus_tarseq_1280 | 5605478  | 5606326  | HERVHF_env  | - |
| Symphalangus_syndactylus_tarseq_1280 | 5607141  | 5607797  | HERVHF_pol  | - |
| Symphalangus_syndactylus_tarseq_1280 | 5607162  | 5607932  | HERVHF_pro  | - |
| Symphalangus_syndactylus_tarseq_1280 | 5608104  | 5608532  | HERVHF_gag  | - |
| Symphalangus_syndactylus_tarseq_1280 | 5610045  | 5610497  | HERVHF_3LTR | - |
| Symphalangus_syndactylus_tarseq_1287 | 1158436  | 1158849  | HERVHF_5LTR | - |
| Symphalangus_syndactylus_tarseq_1287 | 1159302  | 1161216  | HERVHF_pol  | - |
| Symphalangus_syndactylus_tarseq_1287 | 1161053  | 1161643  | HERVHF_pro  | - |
| Symphalangus_syndactylus_tarseq_1287 | 1163733  | 1164147  | HERVHF_3LTR | - |
| Symphalangus_syndactylus_tarseq_1288 | 866193   | 866636   | HERVHF_5LTR | + |
| Symphalangus_syndactylus_tarseq_1288 | 874219   | 874902   | HERVHF_gag  | + |
| Symphalangus_syndactylus_tarseq_1288 | 875151   | 875489   | HERVHF_pro  | + |
| Symphalangus_syndactylus_tarseq_1288 | 875522   | 877274   | HERVHF_pol  | + |
| Symphalangus_syndactylus_tarseq_1288 | 879281   | 879727   | HERVHF_3LTR | + |



|                                         |          |          |                |   |
|-----------------------------------------|----------|----------|----------------|---|
| Symphalangus_syndactylus_tarseq_132     | 3239291  | 3239762  | HERVHF_5LTR    | - |
| Symphalangus_syndactylus_tarseq_132     | 3240182  | 3241905  | HERVHF_pol     | - |
| Symphalangus_syndactylus_tarseq_132     | 3241841  | 3242479  | HERVHF_pro     | - |
| Symphalangus_syndactylus_tarseq_132     | 3244483  | 3244960  | HERVHF_3LTR    | - |
| Symphalangus_syndactylus_tarseq_17      | 10246148 | 10246469 | HERVHF_5LTR    | + |
| Symphalangus_syndactylus_tarseq_17      | 10248483 | 10249214 | HERVHF_pro     | + |
| Symphalangus_syndactylus_tarseq_17      | 10248600 | 10250484 | HERVHF_pol     | + |
| Symphalangus_syndactylus_tarseq_17      | 10251240 | 10251569 | HERVHF_3LTR    | + |
| Symphalangus_syndactylus_tarseq_3       | 29354817 | 29355230 | HERVHF_5LTR    | + |
| Symphalangus_syndactylus_tarseq_3       | 29356802 | 29357128 | HERVHF_gag     | + |
| Symphalangus_syndactylus_tarseq_3       | 29357182 | 29357994 | HERVHF_pro     | + |
| Symphalangus_syndactylus_tarseq_3       | 29357353 | 29359621 | HERVHF_pol     | + |
| Symphalangus_syndactylus_tarseq_3       | 29360023 | 29360436 | HERVHF_3LTR    | + |
| Symphalangus_syndactylus_tarseq_43      | 26722756 | 26723187 | HERVHF_5LTR    | + |
| Symphalangus_syndactylus_tarseq_43      | 26724741 | 26725040 | HERVHF_gag     | + |
| Symphalangus_syndactylus_tarseq_43      | 26725157 | 26725957 | HERVHF_pro     | + |
| Symphalangus_syndactylus_tarseq_43      | 26725583 | 26727492 | HERVHF_pol     | + |
| Symphalangus_syndactylus_tarseq_43      | 26727946 | 26728377 | HERVHF_3LTR    | + |
| Symphalangus_syndactylus_tarseq_619     | 764916   | 765266   | HERVHF_5LTR    | + |
| Symphalangus_syndactylus_tarseq_619     | 766839   | 767159   | HERVHF_gag     | + |
| Symphalangus_syndactylus_tarseq_619     | 767270   | 768055   | HERVHF_pro     | + |
| Symphalangus_syndactylus_tarseq_619     | 767807   | 769636   | HERVHF_pol     | + |
| Symphalangus_syndactylus_tarseq_619     | 770163   | 770498   | HERVHF_3LTR    | + |
| Symphalangus_syndactylus_tarseq_72      | 32122859 | 32123259 | HERVHF_5LTR    | - |
| Symphalangus_syndactylus_tarseq_72      | 32124045 | 32125822 | HERVHF_pol     | - |
| Symphalangus_syndactylus_tarseq_72      | 32125250 | 32126083 | HERVHF_pro     | - |
| Symphalangus_syndactylus_tarseq_72      | 32126230 | 32126685 | HERVHF_gag     | - |
| Symphalangus_syndactylus_tarseq_72      | 32128066 | 32128452 | HERVHF_3LTR    | - |
| Symphalangus_syndactylus_tarseq_80      | 24593444 | 24593889 | HERVHF_5LTR    | + |
| Symphalangus_syndactylus_tarseq_80      | 24595940 | 24596758 | HERVHF_pro     | + |
| Symphalangus_syndactylus_tarseq_80      | 24596186 | 24598271 | HERVHF_pol     | + |
| Symphalangus_syndactylus_tarseq_80      | 24598691 | 24599133 | HERVHF_3LTR    | + |
| Theropithecus_gelada_CM009950.17728166  | 7728540  |          | HERVHF_5LTR    | - |
| Theropithecus_gelada_CM009950.17728755  | 7729099  |          | HERVHF_env     | - |
| Theropithecus_gelada_CM009950.17730157  | 7732392  |          | HERVHF_pol     | - |
| Theropithecus_gelada_CM009950.17732116  | 7732796  |          | HERVHF_pro     | - |
| Theropithecus_gelada_CM009950.17733120  | 7733518  |          | HERVHF_gag     | - |
| Theropithecus_gelada_CM009950.17734978  | 7735342  |          | HERVHF_3LTR    | - |
| Theropithecus_gelada_CM009950.141410562 | 41410878 |          | HERVIPADP_5LTR | - |
| Theropithecus_gelada_CM009950.141411267 | 41411608 |          | HERVIPADP_env  | - |
| Theropithecus_gelada_CM009950.141412977 | 41416009 |          | HERVIPADP_pol  | - |
| Theropithecus_gelada_CM009950.141416818 | 41417135 |          | HERVIPADP_gag  | - |
| Theropithecus_gelada_CM009950.141424887 | 41425206 |          | HERVIPADP_3LTR | - |
| Theropithecus_gelada_CM009950.157725622 | 57726011 |          | HERVHF_5LTR    | + |

|                                          |           |             |   |
|------------------------------------------|-----------|-------------|---|
| Theropithecus_gelada_CM009950.157727451  | 57727774  | HERVHF_gag  | + |
| Theropithecus_gelada_CM009950.157727971  | 57729441  | HERVHF_pol  | + |
| Theropithecus_gelada_CM009950.157729882  | 57730229  | HERVHF_env  | + |
| Theropithecus_gelada_CM009950.157730395  | 57730779  | HERVHF_3LTR | + |
| Theropithecus_gelada_CM009950.198233908  | 98234333  | HERVHF_5LTR | + |
| Theropithecus_gelada_CM009950.198236466  | 98236819  | HERVHF_gag  | + |
| Theropithecus_gelada_CM009950.198236951  | 98237754  | HERVHF_pro  | + |
| Theropithecus_gelada_CM009950.198237191  | 98239659  | HERVHF_pol  | + |
| Theropithecus_gelada_CM009950.198240102  | 98240467  | HERVHF_env  | + |
| Theropithecus_gelada_CM009950.198240631  | 98241077  | HERVHF_3LTR | + |
| Theropithecus_gelada_CM009950.1100600973 | 100601300 | HERVHF_5LTR | - |
| Theropithecus_gelada_CM009950.1100601744 | 100603673 | HERVHF_pol  | - |
| Theropithecus_gelada_CM009950.1100606728 | 100607054 | HERVHF_3LTR | - |
| Theropithecus_gelada_CM009950.1122869945 | 122870399 | HERVHF_5LTR | + |
| Theropithecus_gelada_CM009950.1122871086 | 122872320 | HERVHF_gag  | + |
| Theropithecus_gelada_CM009950.1122873050 | 122873463 | HERVHF_pro  | + |
| Theropithecus_gelada_CM009950.1122875830 | 122879159 | HERVHF_pol  | + |
| Theropithecus_gelada_CM009950.1122880570 | 122880980 | HERVHF_env  | + |
| Theropithecus_gelada_CM009950.1122881142 | 122881605 | HERVHF_3LTR | + |
| Theropithecus_gelada_CM009950.1126864665 | 126865119 | HERVHF_5LTR | - |
| Theropithecus_gelada_CM009950.1126865991 | 126867546 | HERVHF_pol  | - |
| Theropithecus_gelada_CM009950.1126867208 | 126867894 | HERVHF_pro  | - |
| Theropithecus_gelada_CM009950.1126868000 | 126868455 | HERVHF_gag  | - |
| Theropithecus_gelada_CM009950.1126869898 | 126870346 | HERVHF_3LTR | - |
| Theropithecus_gelada_CM009950.1132663389 | 132663746 | HERVHF_5LTR | + |
| Theropithecus_gelada_CM009950.1132665211 | 132665555 | HERVHF_gag  | + |
| Theropithecus_gelada_CM009950.1132665545 | 132666138 | HERVHF_pro  | + |
| Theropithecus_gelada_CM009950.1132665845 | 132668099 | HERVHF_pol  | + |
| Theropithecus_gelada_CM009950.1132668789 | 132669391 | HERVHF_env  | + |
| Theropithecus_gelada_CM009950.1132669557 | 132669919 | HERVHF_3LTR | + |
| Theropithecus_gelada_CM009950.1143562450 | 143562926 | HERVHF_5LTR | - |
| Theropithecus_gelada_CM009950.1143565211 | 143570466 | HERVHF_pol  | - |
| Theropithecus_gelada_CM009950.1143569855 | 143570601 | HERVHF_pro  | - |
| Theropithecus_gelada_CM009950.1143571331 | 143571795 | HERVHF_gag  | - |
| Theropithecus_gelada_CM009950.1143573144 | 143573601 | HERVHF_3LTR | - |

|                                          |           |                |   |
|------------------------------------------|-----------|----------------|---|
| Theropithecus_gelada_CM009950.1212391696 | 212392022 | HERVHF_5LTR    | - |
| Theropithecus_gelada_CM009950.1212392714 | 212393385 | HERVHF_pol     | - |
| Theropithecus_gelada_CM009950.1212395688 | 212396015 | HERVHF_3LTR    | - |
| Theropithecus_gelada_CM009951.116354273  | 16354592  | HERVHF_5LTR    | + |
| Theropithecus_gelada_CM009951.116360412  | 16360753  | HERVHF_gag     | + |
| Theropithecus_gelada_CM009951.116361042  | 16362981  | HERVHF_pol     | + |
| Theropithecus_gelada_CM009951.116365431  | 16365746  | HERVHF_3LTR    | + |
| Theropithecus_gelada_CM009951.191470257  | 91470579  | HERVHF_5LTR    | + |
| Theropithecus_gelada_CM009951.191471040  | 91471934  | HERVHF_gag     | + |
| Theropithecus_gelada_CM009951.191471938  | 91473086  | HERVHF_pro     | + |
| Theropithecus_gelada_CM009951.191472154  | 91474625  | HERVHF_pol     | + |
| Theropithecus_gelada_CM009951.191484313  | 91484619  | HERVHF_3LTR    | + |
| Theropithecus_gelada_CM009951.1104674653 | 104675046 | HERVHF_5LTR    | - |
| Theropithecus_gelada_CM009951.1104675321 | 104675857 | HERVHF_pol     | - |
| Theropithecus_gelada_CM009951.1104675345 | 104675941 | HERVHF_pro     | - |
| Theropithecus_gelada_CM009951.1104678647 | 104679042 | HERVHF_3LTR    | - |
| Theropithecus_gelada_CM009952.110021776  | 10022172  | HERVHF_5LTR    | + |
| Theropithecus_gelada_CM009952.110025004  | 10027063  | HERVHF_pol     | + |
| Theropithecus_gelada_CM009952.110027505  | 10027903  | HERVHF_3LTR    | + |
| Theropithecus_gelada_CM009952.1117049151 | 117049562 | HERVHF_5LTR    | - |
| Theropithecus_gelada_CM009952.1117050654 | 117052974 | HERVHF_pol     | - |
| Theropithecus_gelada_CM009952.1117052339 | 117053040 | HERVHF_pro     | - |
| Theropithecus_gelada_CM009952.1117055432 | 117055844 | HERVHF_3LTR    | - |
| Theropithecus_gelada_CM009952.1125386588 | 125387078 | HERVK_5LTR     | - |
| Theropithecus_gelada_CM009952.1125387179 | 125387517 | HERVK_env      | - |
| Theropithecus_gelada_CM009952.1125388192 | 125389934 | HERVK_pol      | - |
| Theropithecus_gelada_CM009952.1125389835 | 125390644 | HERVK_pro      | - |
| Theropithecus_gelada_CM009952.1125391526 | 125392003 | HERVK_3LTR     | - |
| Theropithecus_gelada_CM009953.133893778  | 33894209  | HERVIPADP_5LTR | + |
| Theropithecus_gelada_CM009953.133897376  | 33900422  | HERVIPADP_pol  | + |
| Theropithecus_gelada_CM009953.133901458  | 33902045  | HERVIPADP_env  | + |
| Theropithecus_gelada_CM009953.133902765  | 33903210  | HERVIPADP_3LTR | + |
| Theropithecus_gelada_CM009953.166944180  | 66944656  | HERVHF_5LTR    | - |
| Theropithecus_gelada_CM009953.166944843  | 66945537  | HERVHF_env     | - |
| Theropithecus_gelada_CM009953.166947280  | 66949786  | HERVHF_pol     | - |
| Theropithecus_gelada_CM009953.166950669  | 66951439  | HERVHF_gag     | - |
| Theropithecus_gelada_CM009953.166952245  | 66952715  | HERVHF_3LTR    | - |

|                                 |           |           |             |   |
|---------------------------------|-----------|-----------|-------------|---|
| Theropithecus_gelada_CM009953.1 | 140240846 | 140241259 | HERVHF_5LTR | - |
| Theropithecus_gelada_CM009953.1 | 140241732 | 140243468 | HERVHF_pol  | - |
| Theropithecus_gelada_CM009953.1 | 140243154 | 140243936 | HERVHF_pro  | - |
| Theropithecus_gelada_CM009953.1 | 140245989 | 140246398 | HERVHF_3LTR | - |
| Theropithecus_gelada_CM009953.1 | 148105410 | 148105829 | HERVHF_5LTR | + |
| Theropithecus_gelada_CM009953.1 | 148107311 | 148107619 | HERVHF_gag  | + |
| Theropithecus_gelada_CM009953.1 | 148107611 | 148108496 | HERVHF_pro  | + |
| Theropithecus_gelada_CM009953.1 | 148107897 | 148109753 | HERVHF_pol  | + |
| Theropithecus_gelada_CM009953.1 | 148110431 | 148110855 | HERVHF_3LTR | + |
| Theropithecus_gelada_CM009954.1 | 10625991  | 10626436  | HERVHF_5LTR | - |
| Theropithecus_gelada_CM009954.1 | 10627497  | 10628992  | HERVHF_pol  | - |
| Theropithecus_gelada_CM009954.1 | 10628480  | 10629232  | HERVHF_pro  | - |
| Theropithecus_gelada_CM009954.1 | 10629242  | 10629559  | HERVHF_gag  | - |
| Theropithecus_gelada_CM009954.1 | 10631155  | 10631605  | HERVHF_3LTR | - |
| Theropithecus_gelada_CM009954.1 | 50618131  | 50618538  | HERVHF_5LTR | + |
| Theropithecus_gelada_CM009954.1 | 50619914  | 50620300  | HERVHF_gag  | + |
| Theropithecus_gelada_CM009954.1 | 50620915  | 50621712  | HERVHF_pro  | + |
| Theropithecus_gelada_CM009954.1 | 50621032  | 50623266  | HERVHF_pol  | + |
| Theropithecus_gelada_CM009954.1 | 50624039  | 50624449  | HERVHF_3LTR | + |
| Theropithecus_gelada_CM009954.1 | 62342556  | 62343009  | HERVHF_5LTR | - |
| Theropithecus_gelada_CM009954.1 | 62343618  | 62345448  | HERVHF_pol  | - |
| Theropithecus_gelada_CM009954.1 | 62346678  | 62347131  | HERVHF_3LTR | - |
| Theropithecus_gelada_CM009954.1 | 101466854 | 101467190 | HERVHF_5LTR | + |
| Theropithecus_gelada_CM009954.1 | 101468735 | 101469067 | HERVHF_gag  | + |
| Theropithecus_gelada_CM009954.1 | 101469983 | 101472447 | HERVHF_pol  | + |
| Theropithecus_gelada_CM009954.1 | 101473011 | 101473348 | HERVHF_3LTR | + |
| Theropithecus_gelada_CM009954.1 | 151001645 | 151002043 | HERVHF_5LTR | + |
| Theropithecus_gelada_CM009954.1 | 151003369 | 151003719 | HERVHF_gag  | + |
| Theropithecus_gelada_CM009954.1 | 151003886 | 151004299 | HERVHF_pro  | + |
| Theropithecus_gelada_CM009954.1 | 151004343 | 151006184 | HERVHF_pol  | + |
| Theropithecus_gelada_CM009954.1 | 151007882 | 151008223 | HERVHF_env  | + |
| Theropithecus_gelada_CM009954.1 | 151008389 | 151008779 | HERVHF_3LTR | + |
| Theropithecus_gelada_CM009954.1 | 159340919 | 159341227 | HERVHF_5LTR | + |
| Theropithecus_gelada_CM009954.1 | 159343193 | 159343645 | HERVHF_gag  | + |
| Theropithecus_gelada_CM009954.1 | 159344076 | 159345850 | HERVHF_pol  | + |

|                                                  |               |             |   |
|--------------------------------------------------|---------------|-------------|---|
| Theropithecus_gelada_CM009954.1159346638         | 159346950     | HERVHF_3LTR | + |
| Theropithecus_gelada_CM009954.1183113597         | 183113964     | HERVHF_5LTR | - |
| Theropithecus_gelada_CM009954.1183114411         | 183116791     | HERVHF_pol  | - |
| Theropithecus_gelada_CM009954.1183116120         | 183116986     | HERVHF_pro  | - |
| Theropithecus_gelada_CM009954.1183117042         | 183117383     | HERVHF_gag  | - |
| Theropithecus_gelada_CM009954.1183118831         | 183119198     | HERVHF_3LTR | - |
| Theropithecus_gelada_CM009955.170273329 70273648 | HSERVIII_5LTR | +           |   |
| Theropithecus_gelada_CM009955.170275658 70278467 | HSERVIII_pol  | +           |   |
| Theropithecus_gelada_CM009955.170279319 70279632 | HSERVIII_3LTR | +           |   |
| Theropithecus_gelada_CM009955.183407512 83407957 | HERVHF_5LTR   | +           |   |
| Theropithecus_gelada_CM009955.183409682 83410005 | HERVHF_gag    | +           |   |
| Theropithecus_gelada_CM009955.183410081 83410413 | HERVHF_pro    | +           |   |
| Theropithecus_gelada_CM009955.183410428 83412156 | HERVHF_pol    | +           |   |
| Theropithecus_gelada_CM009955.183412769 83413208 | HERVHF_3LTR   | +           |   |
| Theropithecus_gelada_CM009955.190413310 90413612 | HERVHF_5LTR   | +           |   |
| Theropithecus_gelada_CM009955.190415412 90415729 | HERVHF_gag    | +           |   |
| Theropithecus_gelada_CM009955.190416316 90417827 | HERVHF_pol    | +           |   |
| Theropithecus_gelada_CM009955.190418666 90418965 | HERVHF_3LTR   | +           |   |
| Theropithecus_gelada_CM009955.1115490310         | 115490675     | HERVHF_5LTR | - |
| Theropithecus_gelada_CM009955.1115490841         | 115491230     | HERVHF_env  | - |
| Theropithecus_gelada_CM009955.1115492299         | 115494652     | HERVHF_pol  | - |
| Theropithecus_gelada_CM009955.1115495528         | 115495935     | HERVHF_gag  | - |
| Theropithecus_gelada_CM009955.1115497252         | 115497606     | HERVHF_3LTR | - |
| Theropithecus_gelada_CM009955.1123181587         | 123181893     | HERVHF_5LTR | + |
| Theropithecus_gelada_CM009955.1123190411         | 123190953     | HERVHF_gag  | + |
| Theropithecus_gelada_CM009955.1123191137         | 123191604     | HERVHF_pro  | + |
| Theropithecus_gelada_CM009955.1123191290         | 123193605     | HERVHF_pol  | + |
| Theropithecus_gelada_CM009955.1123196561         | 123196861     | HERVHF_3LTR | + |
| Theropithecus_gelada_CM009955.1134186982         | 134187433     | HERVHF_5LTR | - |
| Theropithecus_gelada_CM009955.1134188235         | 134190420     | HERVHF_pol  | - |
| Theropithecus_gelada_CM009955.1134189923         | 134190705     | HERVHF_pro  | - |
| Theropithecus_gelada_CM009955.1134192888         | 134193335     | HERVHF_3LTR | - |
| Theropithecus_gelada_CM009955.1142109365         | 142109690     | HERVHF_5LTR | + |
| Theropithecus_gelada_CM009955.1142111936         | 142112412     | HERVHF_pro  | + |

|                                          |           |             |   |
|------------------------------------------|-----------|-------------|---|
| Theropithecus_gelada_CM009955.1142112074 | 142113383 | HERVHF_pol  | + |
| Theropithecus_gelada_CM009955.1142113592 | 142114206 | HERVHF_env  | + |
| Theropithecus_gelada_CM009955.1142114490 | 142114825 | HERVHF_3LTR | + |
| Theropithecus_gelada_CM009955.1167181207 | 167181558 | HERVHF_5LTR | - |
| Theropithecus_gelada_CM009955.1167182229 | 167184926 | HERVHF_pol  | - |
| Theropithecus_gelada_CM009955.1167184324 | 167185025 | HERVHF_pro  | - |
| Theropithecus_gelada_CM009955.1167185376 | 167185948 | HERVHF_gag  | - |
| Theropithecus_gelada_CM009955.1167187333 | 167187682 | HERVHF_3LTR | - |
| Theropithecus_gelada_CM009956.149997931  | 49998246  | HERVHF_5LTR | + |
| Theropithecus_gelada_CM009956.150002663  | 50003124  | HERVHF_gag  | + |
| Theropithecus_gelada_CM009956.150003314  | 50004033  | HERVHF_pro  | + |
| Theropithecus_gelada_CM009956.150003521  | 50005673  | HERVHF_pol  | + |
| Theropithecus_gelada_CM009956.150006670  | 50006973  | HERVHF_3LTR | + |
| Theropithecus_gelada_CM009957.12561723   | 2562123   | HERVHF_5LTR | - |
| Theropithecus_gelada_CM009957.12562964   | 2565113   | HERVHF_pol  | - |
| Theropithecus_gelada_CM009957.12564571   | 2565206   | HERVHF_pro  | - |
| Theropithecus_gelada_CM009957.12565402   | 2565743   | HERVHF_gag  | - |
| Theropithecus_gelada_CM009957.12567318   | 2567709   | HERVHF_3LTR | - |
| Theropithecus_gelada_CM009957.138171703  | 38172154  | HERVHF_5LTR | - |
| Theropithecus_gelada_CM009957.138172599  | 38174179  | HERVHF_pol  | - |
| Theropithecus_gelada_CM009957.138174208  | 38174636  | HERVHF_pro  | - |
| Theropithecus_gelada_CM009957.138176722  | 38177176  | HERVHF_3LTR | - |
| Theropithecus_gelada_CM009957.1102814932 | 102815333 | HERVHF_5LTR | - |
| Theropithecus_gelada_CM009957.1102816188 | 102818182 | HERVHF_pol  | - |
| Theropithecus_gelada_CM009957.1102817805 | 102818617 | HERVHF_pro  | - |
| Theropithecus_gelada_CM009957.1102818688 | 102819008 | HERVHF_gag  | - |
| Theropithecus_gelada_CM009957.1102820484 | 102820875 | HERVHF_3LTR | - |
| Theropithecus_gelada_CM009958.1142957091 | 142957554 | HERVHF_5LTR | + |
| Theropithecus_gelada_CM009958.1142959270 | 142959584 | HERVHF_gag  | + |
| Theropithecus_gelada_CM009958.1142959948 | 142962395 | HERVHF_pol  | + |
| Theropithecus_gelada_CM009958.1142962475 | 142964128 | HERVHF_env  | + |
| Theropithecus_gelada_CM009958.1142964352 | 142964815 | HERVHF_3LTR | + |
| Theropithecus_gelada_CM009959.116950704  | 16951068  | HERVHF_5LTR | - |
| Theropithecus_gelada_CM009959.116952107  | 16952586  | HERVHF_pol  | - |
| Theropithecus_gelada_CM009959.116952796  | 16953104  | HERVHF_pro  | - |
| Theropithecus_gelada_CM009959.116954965  | 16955327  | HERVHF_3LTR | - |
| Theropithecus_gelada_CM009959.184097791  | 84098217  | HERVHF_5LTR | - |

Theropithecus\_gelada\_CM009959.184099123 84100643 HERVHF\_pol -  
 Theropithecus\_gelada\_CM009959.184102326 84103180 HERVHF\_pro -  
 Theropithecus\_gelada\_CM009959.184103190 84104185 HERVHF\_gag -  
 Theropithecus\_gelada\_CM009959.184105542 84105966 HERVHF\_3LTR -  
 Theropithecus\_gelada\_CM009959.197735385 97735697 HERVHF\_5LTR -  
 Theropithecus\_gelada\_CM009959.197735863 97736195 HERVHF\_env -  
 Theropithecus\_gelada\_CM009959.197736949 97737860 HERVHF\_pol -  
 Theropithecus\_gelada\_CM009959.197737405 97738193 HERVHF\_pro -  
 Theropithecus\_gelada\_CM009959.197738327 97738683 HERVHF\_gag -  
 Theropithecus\_gelada\_CM009959.197740105 97740433 HERVHF\_3LTR -  
 Theropithecus\_gelada\_CM009959.1107040929 107041361 HERVHF\_5LTR -  
  
 Theropithecus\_gelada\_CM009959.1107042190 107044300 HERVHF\_pol -  
 Theropithecus\_gelada\_CM009959.1107043839 107044330 HERVHF\_pro -  
 Theropithecus\_gelada\_CM009959.1107044609 107044965 HERVHF\_gag -  
 Theropithecus\_gelada\_CM009959.1107046780 107047213 HERVHF\_3LTR -  
  
 Theropithecus\_gelada\_CM009961.1905988 906439 HERVHF\_5LTR +  
 Theropithecus\_gelada\_CM009961.1908052 908393 HERVHF\_gag +  
 Theropithecus\_gelada\_CM009961.1908592 910657 HERVHF\_pol +  
 Theropithecus\_gelada\_CM009961.1911184 911635 HERVHF\_3LTR +  
 Theropithecus\_gelada\_CM009961.123139296 23139671 HSERVIII\_5LTR -  
 Theropithecus\_gelada\_CM009961.123140517 23143650 HSERVIII\_pol -  
 Theropithecus\_gelada\_CM009961.123145945 23146313 HSERVIII\_3LTR -  
 Theropithecus\_gelada\_CM009961.135395506 35395807 HERVHF\_5LTR -  
 Theropithecus\_gelada\_CM009961.135396071 35398219 HERVHF\_pol -  
 Theropithecus\_gelada\_CM009961.135398260 35398592 HERVHF\_pro -  
 Theropithecus\_gelada\_CM009961.135400554 35400863 HERVHF\_3LTR -  
 Theropithecus\_gelada\_CM009961.183305352 83305788 HERVHF\_5LTR +  
 Theropithecus\_gelada\_CM009961.183307531 83308022 HERVHF\_gag +  
 Theropithecus\_gelada\_CM009961.183308297 83311174 HERVHF\_pol +  
 Theropithecus\_gelada\_CM009961.183311283 83311633 HERVHF\_env +  
 Theropithecus\_gelada\_CM009961.183311792 83312221 HERVHF\_3LTR +  
 Theropithecus\_gelada\_CM009962.143518967 43519420 HERVK\_5LTR -  
 Theropithecus\_gelada\_CM009962.143520372 43522284 HERVK\_pol -  
 Theropithecus\_gelada\_CM009962.143522179 43523078 HERVK\_pro -  
 Theropithecus\_gelada\_CM009962.143524045 43524494 HERVK\_3LTR -  
 Theropithecus\_gelada\_CM009962.196915122 96915473 HERVHF\_5LTR -  
 Theropithecus\_gelada\_CM009962.196915640 96916839 HERVHF\_env -  
 Theropithecus\_gelada\_CM009962.196918121 96919979 HERVHF\_pol -  
 Theropithecus\_gelada\_CM009962.196920470 96920934 HERVHF\_gag -  
 Theropithecus\_gelada\_CM009962.196922527 96922881 HERVHF\_3LTR -  
 Theropithecus\_gelada\_CM009963.168072041 68072385 HERVHF\_5LTR -  
 Theropithecus\_gelada\_CM009963.168072798 68073328 HERVHF\_env -

Theropithecus\_gelada\_CM009963.168074848 68077886 HERVHF\_pol -  
 Theropithecus\_gelada\_CM009963.168077248 68077997 HERVHF\_pro -  
 Theropithecus\_gelada\_CM009963.168079391 68080026 HERVHF\_gag -  
 Theropithecus\_gelada\_CM009963.168081676 68082012 HERVHF\_3LTR -  
 Theropithecus\_gelada\_CM009963.168175155 68175456 HERVHF\_5LTR -  
 Theropithecus\_gelada\_CM009963.168179982 68182079 HERVHF\_pol -  
 Theropithecus\_gelada\_CM009963.168182237 68182680 HERVHF\_gag -  
 Theropithecus\_gelada\_CM009963.168183671 68183984 HERVHF\_3LTR -  
 Theropithecus\_gelada\_CM009963.172650152 72650553 HERVHF\_5LTR -  
 Theropithecus\_gelada\_CM009963.172651494 72653551 HERVHF\_pol -  
 Theropithecus\_gelada\_CM009963.172652928 72653800 HERVHF\_pro -  
 Theropithecus\_gelada\_CM009963.172654860 72655248 HERVHF\_3LTR -  
 Theropithecus\_gelada\_CM009964.133042798 33043254 HERVHF\_5LTR -  
 Theropithecus\_gelada\_CM009964.133044449 33046123 HERVHF\_pol -  
 Theropithecus\_gelada\_CM009964.133045581 33046366 HERVHF\_pro -  
 Theropithecus\_gelada\_CM009964.133048506 33048970 HERVHF\_3LTR -  
 Theropithecus\_gelada\_CM009964.1124624097 124624547 HERVHF\_5LTR +  
  
 Theropithecus\_gelada\_CM009964.1124626904 124628604 HERVHF\_pol +  
 Theropithecus\_gelada\_CM009964.1124629404 124629859 HERVHF\_3LTR +  
  
 Theropithecus\_gelada\_CM009966.14074346 4074670 HERVK\_5LTR -  
 Theropithecus\_gelada\_CM009966.14075517 4076819 HERVK\_pol -  
 Theropithecus\_gelada\_CM009966.14076687 4077487 HERVK\_pro -  
 Theropithecus\_gelada\_CM009966.14078697 4079021 HERVK\_3LTR -  
 Theropithecus\_gelada\_CM009967.179102108 79102427 HERVHF\_5LTR -  
 Theropithecus\_gelada\_CM009967.179102831 79103260 HERVHF\_env -  
 Theropithecus\_gelada\_CM009967.179103462 79105619 HERVHF\_pol -  
 Theropithecus\_gelada\_CM009967.179105083 79105580 HERVHF\_pro -  
 Theropithecus\_gelada\_CM009967.179107636 79107948 HERVHF\_3LTR -  
 Theropithecus\_gelada\_CM009969.119546419 19546727 HERVIPADP\_5LTR -  
 Theropithecus\_gelada\_CM009969.119550888 19553145 HERVIPADP\_pol -  
 Theropithecus\_gelada\_CM009969.119560579 19560900 HERVIPADP\_3LTR -  
 Theropithecus\_gelada\_CM009969.120050828 20051299 HERVIPADP\_5LTR -  
 Theropithecus\_gelada\_CM009969.120051852 20052433 HERVIPADP\_env -  
 Theropithecus\_gelada\_CM009969.120053409 20056010 HERVIPADP\_pol -  
 Theropithecus\_gelada\_CM009969.120059261 20059720 HERVIPADP\_3LTR -  
 Theropithecus\_gelada\_CM009969.123393424 23393747 HERVHF\_5LTR -  
 Theropithecus\_gelada\_CM009969.123394581 23397538 HERVHF\_pol -  
 Theropithecus\_gelada\_CM009969.123397002 23397538 HERVHF\_pro -  
 Theropithecus\_gelada\_CM009969.123404774 23405091 HERVHF\_3LTR -  
 Theropithecus\_gelada\_CM009970.157096520 57096884 HERVHF\_5LTR +  
 Theropithecus\_gelada\_CM009970.157098655 57098954 HERVHF\_gag +  
 Theropithecus\_gelada\_CM009970.157099999 57100694 HERVHF\_pro +



|                                          |           |               |               |
|------------------------------------------|-----------|---------------|---------------|
| Theropithecus_gelada_CM009970.157100275  | 57103142  | HERVHF_pol    | +             |
| Theropithecus_gelada_CM009970.157103429  | 57103803  | HERVHF_3LTR   | +             |
| Theropithecus_gelada_CM009971.121725626  | 21725955  | HERVHF_5LTR   | +             |
| Theropithecus_gelada_CM009971.121727207  | 21727785  | HERVHF_gag    | +             |
| Theropithecus_gelada_CM009971.121727812  | 21728789  | HERVHF_pro    | +             |
| Theropithecus_gelada_CM009971.121728205  | 21730765  | HERVHF_pol    | +             |
| Theropithecus_gelada_CM009971.121731843  | 21732161  | HERVHF_3LTR   | +             |
| Theropithecus_gelada_CM009971.171854357  | 71854790  | HERVHF_5LTR   | -             |
| Theropithecus_gelada_CM009971.171859766  | 71860611  | HERVHF_env    | -             |
| Theropithecus_gelada_CM009971.171862735  | 71864709  | HERVHF_pol    | -             |
| Theropithecus_gelada_CM009971.171864281  | 71865078  | HERVHF_pro    | -             |
| Theropithecus_gelada_CM009971.171865507  | 71866043  | HERVHF_gag    | -             |
| Theropithecus_gelada_CM009971.171866519  | 71866949  | HERVHF_3LTR   | -             |
| Theropithecus_gelada_CM009971.180203330  | 80203706  | HERVHF_5LTR   | +             |
| Theropithecus_gelada_CM009971.180205061  | 80205372  | HERVHF_gag    | +             |
| Theropithecus_gelada_CM009971.180205363  | 80207336  | HERVHF_pol    | +             |
| Theropithecus_gelada_CM009971.180208090  | 80209152  | HERVHF_env    | +             |
| Theropithecus_gelada_CM009971.180209295  | 80209672  | HERVHF_3LTR   | +             |
| Theropithecus_gelada_CM009971.186976723  | 86977267  | HERVHF_5LTR   | +             |
| Theropithecus_gelada_CM009971.186982660  | 86983430  | HERVHF_pro    | +             |
| Theropithecus_gelada_CM009971.186982792  | 86984885  | HERVHF_pol    | +             |
| Theropithecus_gelada_CM009971.186991417  | 86991952  | HERVHF_3LTR   | +             |
| Theropithecus_gelada_CM009971.1118380766 | 118381237 | HERVHF_5LTR   | -             |
| Theropithecus_gelada_CM009971.1118382123 | 118383465 | HERVHF_pol    | -             |
| Theropithecus_gelada_CM009971.1118383046 | 118383831 | HERVHF_pro    | -             |
| Theropithecus_gelada_CM009971.1118386003 | 118386480 | HERVHF_3LTR   | -             |
| Theropithecus_gelada_CM009971.1147187140 | 147187696 | HSERVIII_5LTR | +             |
| Theropithecus_gelada_CM009971.1147197253 | 147197795 | HSERVIII_pol  | +             |
| Theropithecus_gelada_CM009971.1147198198 | 147198761 | HSERVIII_3LTR | +             |
| Trachypithecus_phayrei_ctg1              | 36867080  | 36867537      | HERVHF_5LTR - |
| Trachypithecus_phayrei_ctg1              | 36868395  | 36870742      | HERVHF_pol -  |
| Trachypithecus_phayrei_ctg1              | 36870179  | 36870979      | HERVHF_pro -  |
| Trachypithecus_phayrei_ctg1              | 36873007  | 36873462      | HERVHF_3LTR - |
| Trachypithecus_phayrei_ctg11             | 37747240  | 37747690      | HERVHF_5LTR + |
| Trachypithecus_phayrei_ctg11             | 37749374  | 37749697      | HERVHF_gag +  |
| Trachypithecus_phayrei_ctg11             | 37750282  | 37751334      | HERVHF_pro +  |
| Trachypithecus_phayrei_ctg11             | 37750531  | 37752377      | HERVHF_pol +  |
| Trachypithecus_phayrei_ctg11             | 37753284  | 37753735      | HERVHF_3LTR + |
| Trachypithecus_phayrei_ctg117            | 1073782   | 1074205       | HERVHF_5LTR - |
| Trachypithecus_phayrei_ctg117            | 1075133   | 1077172       | HERVHF_pol -  |

|                               |          |          |             |   |
|-------------------------------|----------|----------|-------------|---|
| Trachypithecus_phayrei_ctg117 | 1077506  | 1077922  | HERVHF_pro  | - |
| Trachypithecus_phayrei_ctg117 | 1078183  | 1078527  | HERVHF_gag  | - |
| Trachypithecus_phayrei_ctg117 | 1080063  | 1080484  | HERVHF_3LTR | - |
| Trachypithecus_phayrei_ctg125 | 351744   | 352075   | HERVHF_5LTR | - |
| Trachypithecus_phayrei_ctg125 | 352195   | 352597   | HERVHF_env  | - |
| Trachypithecus_phayrei_ctg125 | 352623   | 354757   | HERVHF_pol  | - |
| Trachypithecus_phayrei_ctg125 | 354539   | 354865   | HERVHF_pro  | - |
| Trachypithecus_phayrei_ctg125 | 355171   | 355470   | HERVHF_gag  | - |
| Trachypithecus_phayrei_ctg125 | 357442   | 357767   | HERVHF_3LTR | - |
| Trachypithecus_phayrei_ctg15  | 9593176  | 9593482  | HERVHF_5LTR | - |
| Trachypithecus_phayrei_ctg15  | 9596949  | 9597518  | HERVHF_pol  | - |
| Trachypithecus_phayrei_ctg15  | 9597060  | 9597818  | HERVHF_pro  | - |
| Trachypithecus_phayrei_ctg15  | 9604399  | 9604701  | HERVHF_3LTR | - |
| Trachypithecus_phayrei_ctg159 | 7602136  | 7602483  | HERVHF_5LTR | - |
| Trachypithecus_phayrei_ctg159 | 7603763  | 7605744  | HERVHF_pol  | - |
| Trachypithecus_phayrei_ctg159 | 7606463  | 7606894  | HERVHF_gag  | - |
| Trachypithecus_phayrei_ctg159 | 7608542  | 7608883  | HERVHF_3LTR | - |
| Trachypithecus_phayrei_ctg16  | 3889536  | 3889951  | HERVHF_5LTR | - |
| Trachypithecus_phayrei_ctg16  | 3890102  | 3890443  | HERVHF_env  | - |
| Trachypithecus_phayrei_ctg16  | 3890655  | 3894708  | HERVHF_pol  | - |
| Trachypithecus_phayrei_ctg16  | 3894043  | 3894801  | HERVHF_pro  | - |
| Trachypithecus_phayrei_ctg16  | 3895027  | 3895542  | HERVHF_gag  | - |
| Trachypithecus_phayrei_ctg16  | 3896990  | 3897405  | HERVHF_3LTR | - |
| Trachypithecus_phayrei_ctg167 | 1862438  | 1862941  | HERVHF_5LTR | - |
| Trachypithecus_phayrei_ctg167 | 1866814  | 1869070  | HERVHF_pol  | - |
| Trachypithecus_phayrei_ctg167 | 1868513  | 1869232  | HERVHF_pro  | - |
| Trachypithecus_phayrei_ctg167 | 1871277  | 1871781  | HERVHF_3LTR | - |
| Trachypithecus_phayrei_ctg17  | 40160244 | 40161198 | HERVHF_5LTR | - |
| Trachypithecus_phayrei_ctg17  | 40161237 | 40163090 | HERVHF_pol  | - |
| Trachypithecus_phayrei_ctg17  | 40165858 | 40166809 | HERVHF_3LTR | - |
| Trachypithecus_phayrei_ctg18  | 13308    | 13665    | HERVHF_5LTR | - |
| Trachypithecus_phayrei_ctg18  | 13897    | 14325    | HERVHF_env  | - |
| Trachypithecus_phayrei_ctg18  | 14424    | 17000    | HERVHF_pol  | - |
| Trachypithecus_phayrei_ctg18  | 16473    | 17036    | HERVHF_pro  | - |
| Trachypithecus_phayrei_ctg18  | 17248    | 17553    | HERVHF_gag  | - |
| Trachypithecus_phayrei_ctg18  | 19038    | 19403    | HERVHF_3LTR | - |
| Trachypithecus_phayrei_ctg19  | 8184114  | 8184515  | HERVHF_5LTR | + |
| Trachypithecus_phayrei_ctg19  | 8186082  | 8186834  | HERVHF_pro  | + |
| Trachypithecus_phayrei_ctg19  | 8186214  | 8187691  | HERVHF_pol  | + |
| Trachypithecus_phayrei_ctg19  | 8187857  | 8188260  | HERVHF_3LTR | + |
| Trachypithecus_phayrei_ctg190 | 1456164  | 1456468  | HERVHF_5LTR | - |
| Trachypithecus_phayrei_ctg190 | 1456974  | 1458957  | HERVHF_pol  | - |
| Trachypithecus_phayrei_ctg190 | 1458616  | 1459188  | HERVHF_pro  | - |
| Trachypithecus_phayrei_ctg190 | 1459783  | 1460136  | HERVHF_gag  | - |

|                               |         |         |             |   |
|-------------------------------|---------|---------|-------------|---|
| Trachypithecus_phayrei_ctg190 | 1464821 | 1465121 | HERVHF_3LTR | - |
| Trachypithecus_phayrei_ctg199 | 1856413 | 1856786 | HERVHF_5LTR | - |
| Trachypithecus_phayrei_ctg199 | 1857014 | 1857654 | HERVHF_env  | - |
| Trachypithecus_phayrei_ctg199 | 1858456 | 1859136 | HERVHF_pol  | - |
| Trachypithecus_phayrei_ctg199 | 1858582 | 1859304 | HERVHF_pro  | - |
| Trachypithecus_phayrei_ctg199 | 1859445 | 1861015 | HERVHF_gag  | - |
| Trachypithecus_phayrei_ctg199 | 1861744 | 1862116 | HERVHF_3LTR | - |
| Trachypithecus_phayrei_ctg2   | 3135737 | 3136140 | HERVHF_5LTR | - |
| Trachypithecus_phayrei_ctg2   | 3137060 | 3137374 | HERVHF_env  | - |
| Trachypithecus_phayrei_ctg2   | 3138423 | 3141324 | HERVHF_pol  | - |
| Trachypithecus_phayrei_ctg2   | 3141111 | 3141440 | HERVHF_pro  | - |
| Trachypithecus_phayrei_ctg2   | 3142029 | 3142418 | HERVHF_gag  | - |
| Trachypithecus_phayrei_ctg2   | 3148950 | 3149364 | HERVHF_3LTR | - |
| Trachypithecus_phayrei_ctg203 | 2921305 | 2921629 | HERVHF_5LTR | + |
| Trachypithecus_phayrei_ctg203 | 2922969 | 2923361 | HERVHF_gag  | + |
| Trachypithecus_phayrei_ctg203 | 2924635 | 2926762 | HERVHF_pol  | + |
| Trachypithecus_phayrei_ctg203 | 2927267 | 2927629 | HERVHF_env  | + |
| Trachypithecus_phayrei_ctg203 | 2927821 | 2928150 | HERVHF_3LTR | + |
| Trachypithecus_phayrei_ctg21  | 1181086 | 1181395 | HERVHF_5LTR | + |
| Trachypithecus_phayrei_ctg21  | 1184318 | 1184620 | HERVHF_gag  | + |
| Trachypithecus_phayrei_ctg21  | 1184706 | 1185512 | HERVHF_pro  | + |
| Trachypithecus_phayrei_ctg21  | 1184982 | 1186677 | HERVHF_pol  | + |
| Trachypithecus_phayrei_ctg21  | 1187351 | 1187674 | HERVHF_3LTR | + |
| Trachypithecus_phayrei_ctg216 | 654655  | 654970  | HERVHF_5LTR | - |
| Trachypithecus_phayrei_ctg216 | 655664  | 657064  | HERVHF_pol  | - |
| Trachypithecus_phayrei_ctg216 | 657152  | 657919  | HERVHF_pro  | - |
| Trachypithecus_phayrei_ctg216 | 657953  | 658621  | HERVHF_gag  | - |
| Trachypithecus_phayrei_ctg216 | 660204  | 660517  | HERVHF_3LTR | - |
| Trachypithecus_phayrei_ctg222 | 1839646 | 1840060 | HERVHF_5LTR | - |
| Trachypithecus_phayrei_ctg222 | 1841085 | 1842628 | HERVHF_pol  | - |
| Trachypithecus_phayrei_ctg222 | 1842116 | 1842829 | HERVHF_pro  | - |
| Trachypithecus_phayrei_ctg222 | 1842917 | 1843351 | HERVHF_gag  | - |
| Trachypithecus_phayrei_ctg222 | 1844730 | 1845148 | HERVHF_3LTR | - |
| Trachypithecus_phayrei_ctg31  | 5193946 | 5194375 | HERVHF_5LTR | - |
| Trachypithecus_phayrei_ctg31  | 5195182 | 5197574 | HERVHF_pol  | - |
| Trachypithecus_phayrei_ctg31  | 5197549 | 5197932 | HERVHF_pro  | - |
| Trachypithecus_phayrei_ctg31  | 5200621 | 5201054 | HERVHF_3LTR | - |
| Trachypithecus_phayrei_ctg31  | 5993919 | 5994240 | HERVHF_5LTR | + |
| Trachypithecus_phayrei_ctg31  | 5996259 | 5996582 | HERVHF_gag  | + |
| Trachypithecus_phayrei_ctg31  | 5996869 | 5997378 | HERVHF_pol  | + |
| Trachypithecus_phayrei_ctg31  | 5998578 | 5998901 | HERVHF_3LTR | + |
| Trachypithecus_phayrei_ctg35  | 4550211 | 4550641 | HERVHF_5LTR | - |
| Trachypithecus_phayrei_ctg35  | 4551928 | 4553380 | HERVHF_pol  | - |
| Trachypithecus_phayrei_ctg35  | 4555657 | 4556074 | HERVHF_3LTR | - |

|                               |          |          |                   |   |
|-------------------------------|----------|----------|-------------------|---|
| Trachypithecus_phayrei_ctg354 | 592806   | 593241   | HERVHF_5LTR       | - |
| Trachypithecus_phayrei_ctg354 | 593617   | 594505   | HERVHF_env        | - |
| Trachypithecus_phayrei_ctg354 | 595497   | 597531   | HERVHF_pol        | - |
| Trachypithecus_phayrei_ctg354 | 597776   | 598216   | HERVHF_pro        | - |
| Trachypithecus_phayrei_ctg354 | 600504   | 600941   | HERVHF_3LTR       | - |
| Trachypithecus_phayrei_ctg36  | 19713954 | 19714430 | HERVHF_5LTR       | + |
| Trachypithecus_phayrei_ctg36  | 19716646 | 19717038 | HERVHF_pro        | + |
| Trachypithecus_phayrei_ctg36  | 19716987 | 19718372 | HERVHF_pol        | + |
| Trachypithecus_phayrei_ctg36  | 19719196 | 19719667 | HERVHF_3LTR       | + |
| Trachypithecus_phayrei_ctg409 | 272346   | 272798   | HERVHF_5LTR       | + |
| Trachypithecus_phayrei_ctg409 | 275127   | 276562   | HERVHF_pol        | + |
| Trachypithecus_phayrei_ctg409 | 277397   | 277849   | HERVHF_3LTR       | + |
| Trachypithecus_phayrei_ctg45  | 20076807 | 20077247 | HERVHF_5LTR       | - |
| Trachypithecus_phayrei_ctg45  | 20077802 | 20079819 | HERVHF_pol        | - |
| Trachypithecus_phayrei_ctg45  | 20079827 | 20080234 | HERVHF_pro        | - |
| Trachypithecus_phayrei_ctg45  | 20080333 | 20081062 | HERVHF_gag        | - |
| Trachypithecus_phayrei_ctg45  | 20082334 | 20082773 | HERVHF_3LTR       | - |
| Trachypithecus_phayrei_ctg46  | 8677890  | 8678351  | HERVHF_5LTR       | - |
| Trachypithecus_phayrei_ctg46  | 8679088  | 8681484  | HERVHF_pol        | - |
| Trachypithecus_phayrei_ctg46  | 8680720  | 8681553  | HERVHF_pro        | - |
| Trachypithecus_phayrei_ctg46  | 8683627  | 8684099  | HERVHF_3LTR       | - |
| Trachypithecus_phayrei_ctg49  | 2589775  | 2590208  | HERVHF_5LTR       | + |
| Trachypithecus_phayrei_ctg49  | 2592010  | 2592309  | HERVHF_gag        | + |
| Trachypithecus_phayrei_ctg49  | 2592675  | 2594341  | HERVHF_pol        | + |
| Trachypithecus_phayrei_ctg49  | 2595591  | 2596024  | HERVHF_3LTR       | + |
| Trachypithecus_phayrei_ctg497 | 286426   | 286860   | HERVHF_5LTR       | - |
| Trachypithecus_phayrei_ctg497 | 287968   | 290767   | HERVHF_pol        | - |
| Trachypithecus_phayrei_ctg497 | 291126   | 291545   | HERVHF_gag        | - |
| Trachypithecus_phayrei_ctg497 | 292927   | 293349   | HERVHF_3LTR       | - |
| Trachypithecus_phayrei_ctg500 | 106782   | 107202   | HERVHF_5LTR       | - |
| Trachypithecus_phayrei_ctg500 | 107713   | 108207   | HERVHF_env        | - |
| Trachypithecus_phayrei_ctg500 | 110460   | 112513   | HERVHF_pol        | - |
| Trachypithecus_phayrei_ctg500 | 113497   | 113829   | HERVHF_gag        | - |
| Trachypithecus_phayrei_ctg500 | 115754   | 116178   | HERVHF_3LTR       | - |
| Trachypithecus_phayrei_ctg51  | 2961614  | 2962026  | HERVHF_5LTR       | - |
| Trachypithecus_phayrei_ctg51  | 2962390  | 2964810  | HERVHF_pol        | - |
| Trachypithecus_phayrei_ctg51  | 2964899  | 2965309  | HERVHF_pro        | - |
| Trachypithecus_phayrei_ctg51  | 2965362  | 2966918  | HERVHF_gag        | - |
| Trachypithecus_phayrei_ctg51  | 2967511  | 2967923  | HERVHF_3LTR       | - |
| Trachypithecus_phayrei_ctg61  | 9364625  | 9364924  | Unknown_HERV_5LTR | - |
| Trachypithecus_phayrei_ctg61  | 9367245  | 9375219  | Unknown_HERV_pol  | - |
| Trachypithecus_phayrei_ctg61  | 9374575  | 9375480  | Unknown_HERV_pro  | - |
| Trachypithecus_phayrei_ctg61  | 9375612  | 9375947  | Unknown_HERV_gag  | - |
| Trachypithecus_phayrei_ctg61  | 9379603  | 9379902  | Unknown_HERV_3LTR | - |

|                              |          |          |             |   |
|------------------------------|----------|----------|-------------|---|
| Trachypithecus_phayrei_ctg65 | 3633442  | 3633790  | HERVHF_5LTR | - |
| Trachypithecus_phayrei_ctg65 | 3634806  | 3636812  | HERVHF_pol  | - |
| Trachypithecus_phayrei_ctg65 | 3636291  | 3637055  | HERVHF_pro  | - |
| Trachypithecus_phayrei_ctg65 | 3637108  | 3637464  | HERVHF_gag  | - |
| Trachypithecus_phayrei_ctg65 | 3638964  | 3639294  | HERVHF_3LTR | - |
| Trachypithecus_phayrei_ctg66 | 1547521  | 1547932  | HERVHF_5LTR | + |
| Trachypithecus_phayrei_ctg66 | 1550375  | 1551094  | HERVHF_pro  | + |
| Trachypithecus_phayrei_ctg66 | 1550579  | 1552281  | HERVHF_pol  | + |
| Trachypithecus_phayrei_ctg66 | 1553092  | 1553506  | HERVHF_3LTR | + |
| Trachypithecus_phayrei_ctg69 | 14883471 | 14883778 | HERVHF_5LTR | - |
| Trachypithecus_phayrei_ctg69 | 14887540 | 14887872 | HERVHF_env  | - |
| Trachypithecus_phayrei_ctg69 | 14888212 | 14890160 | HERVHF_pol  | - |
| Trachypithecus_phayrei_ctg69 | 14889612 | 14890241 | HERVHF_pro  | - |
| Trachypithecus_phayrei_ctg69 | 14890500 | 14890943 | HERVHF_gag  | - |
| Trachypithecus_phayrei_ctg69 | 14893019 | 14893324 | HERVHF_3LTR | - |
| Trachypithecus_phayrei_ctg7  | 10861045 | 10861429 | HERVHF_5LTR | + |
| Trachypithecus_phayrei_ctg7  | 10862961 | 10863530 | HERVHF_gag  | + |
| Trachypithecus_phayrei_ctg7  | 10863586 | 10864140 | HERVHF_pro  | + |
| Trachypithecus_phayrei_ctg7  | 10863888 | 10865414 | HERVHF_pol  | + |
| Trachypithecus_phayrei_ctg7  | 10867377 | 10867727 | HERVHF_env  | + |
| Trachypithecus_phayrei_ctg7  | 10867870 | 10868261 | HERVHF_3LTR | + |
| Trachypithecus_phayrei_ctg73 | 27317232 | 27317587 | HERVHF_5LTR | + |
| Trachypithecus_phayrei_ctg73 | 27320688 | 27321173 | HERVHF_gag  | + |
| Trachypithecus_phayrei_ctg73 | 27321627 | 27322395 | HERVHF_pro  | + |
| Trachypithecus_phayrei_ctg73 | 27322069 | 27324633 | HERVHF_pol  | + |
| Trachypithecus_phayrei_ctg73 | 27328537 | 27328896 | HERVHF_3LTR | + |
| Trachypithecus_phayrei_ctg80 | 4204779  | 4205227  | HERVHF_5LTR | + |
| Trachypithecus_phayrei_ctg80 | 4207783  | 4208157  | HERVHF_pro  | + |
| Trachypithecus_phayrei_ctg80 | 4208309  | 4208869  | HERVHF_pol  | + |
| Trachypithecus_phayrei_ctg80 | 4214182  | 4214583  | HERVHF_env  | + |
| Trachypithecus_phayrei_ctg80 | 4214999  | 4215445  | HERVHF_3LTR | + |
| Trachypithecus_phayrei_ctg85 | 13677443 | 13677881 | HERVHF_5LTR | - |
| Trachypithecus_phayrei_ctg85 | 13678403 | 13680366 | HERVHF_pol  | - |
| Trachypithecus_phayrei_ctg85 | 13679905 | 13680982 | HERVHF_pro  | - |
| Trachypithecus_phayrei_ctg85 | 13682940 | 13683382 | HERVHF_3LTR | - |
| Trachypithecus_phayrei_ctg87 | 30673    | 31071    | HERVHF_5LTR | + |
| Trachypithecus_phayrei_ctg87 | 33258    | 35290    | HERVHF_pol  | + |
| Trachypithecus_phayrei_ctg87 | 35783    | 36190    | HERVHF_3LTR | + |
| Trachypithecus_phayrei_ctg95 | 7827629  | 7827966  | HERVHF_5LTR | + |
| Trachypithecus_phayrei_ctg95 | 7829939  | 7830697  | HERVHF_pro  | + |
| Trachypithecus_phayrei_ctg95 | 7830074  | 7831924  | HERVHF_pol  | + |
| Trachypithecus_phayrei_ctg95 | 7832478  | 7832821  | HERVHF_3LTR | + |
| Trachypithecus_phayrei_ctg96 | 9098975  | 9099341  | HERVHF_5LTR | - |
| Trachypithecus_phayrei_ctg96 | 9100026  | 9101698  | HERVHF_pol  | - |

|                              |         |         |             |   |
|------------------------------|---------|---------|-------------|---|
| Trachypithecus_phayrei_ctg96 | 9101363 | 9102055 | HERVHF_pro  | - |
| Trachypithecus_phayrei_ctg96 | 9102169 | 9102603 | HERVHF_gag  | - |
| Trachypithecus_phayrei_ctg96 | 9105415 | 9105778 | HERVHF_3LTR | - |

### Supplementary data S3 The vertical transmission events in human genomes

#### HERV-class&num Distribution

|          |                                        |
|----------|----------------------------------------|
| HERVHF1  | "Homo sapiens,Gorilla gorilla gorilla" |
| HERVHF2  | "Homo sapiens,Gorilla gorilla gorilla" |
| HERVHF3  | "Homo sapiens,Gorilla gorilla gorilla" |
| HERVHF4  | "Homo sapiens,Gorilla gorilla gorilla" |
| HERVHF5  | "Homo sapiens,Gorilla gorilla gorilla" |
| HERVHF6  | "Homo sapiens,Gorilla gorilla gorilla" |
| HERVHF7  | "Homo sapiens,Gorilla gorilla gorilla" |
| HERVHF8  | "Homo sapiens,Gorilla gorilla gorilla" |
| HERVHF9  | "Homo sapiens,Gorilla gorilla gorilla" |
| HERVHF10 | "Homo sapiens,Gorilla gorilla gorilla" |
| HERVHF11 | "Homo sapiens,Gorilla gorilla gorilla" |
| HERVHF12 | "Homo sapiens,Gorilla gorilla gorilla" |
| HERVHF13 | "Homo sapiens,Gorilla gorilla gorilla" |
| HERVHF14 | "Homo sapiens,Gorilla gorilla gorilla" |
| HERVHF15 | "Homo sapiens,Gorilla gorilla gorilla" |
| HERVHF16 | "Homo sapiens,Gorilla gorilla gorilla" |
| HERVHF17 | "Homo sapiens,Gorilla gorilla gorilla" |
| HERVHF18 | "Homo sapiens,Gorilla gorilla gorilla" |
| HERVHF19 | "Homo sapiens,Gorilla gorilla gorilla" |
| HERVHF20 | "Homo sapiens,Gorilla gorilla gorilla" |
| HERVHF21 | "Homo sapiens,Gorilla gorilla gorilla" |
| HERVHF22 | "Homo sapiens,Gorilla gorilla gorilla" |
| HERVHF23 | "Homo sapiens,Gorilla gorilla gorilla" |
| HERVHF24 | "Homo sapiens,Gorilla gorilla gorilla" |
| HERVHF25 | "Homo sapiens,Gorilla gorilla gorilla" |
| HERVHF26 | "Homo sapiens,Gorilla gorilla gorilla" |
| HERVHF27 | "Homo sapiens,Gorilla gorilla gorilla" |
| HERVHF28 | "Homo sapiens,Gorilla gorilla gorilla" |
| HERVHF29 | "Homo sapiens,Gorilla gorilla gorilla" |
| HERVHF30 | "Homo sapiens,Gorilla gorilla gorilla" |
| HERVHF31 | "Homo sapiens,Gorilla gorilla gorilla" |
| HERVHF32 | "Homo sapiens,Gorilla gorilla gorilla" |
| HERVHF33 | "Homo sapiens,Gorilla gorilla gorilla" |
| HERVHF34 | "Homo sapiens,Gorilla gorilla gorilla" |
| HERVHF35 | "Homo sapiens,Gorilla gorilla gorilla" |
| HERVHF36 | "Homo sapiens,Gorilla gorilla gorilla" |
| HERVHF37 | "Homo sapiens,Gorilla gorilla gorilla" |
| HERVHF38 | "Homo sapiens,Gorilla gorilla gorilla" |
| HERVHF39 | "Homo sapiens,Gorilla gorilla gorilla" |
| HERVHF40 | "Homo sapiens,Gorilla gorilla gorilla" |
| HERVHF41 | "Homo sapiens,Gorilla gorilla gorilla" |

[illegible]



|           |                                                        |
|-----------|--------------------------------------------------------|
| HERVHF86  | "Homo sapiens,Hylobates pileatus"                      |
| HERVHF87  | "Homo sapiens,Pan paniscus"                            |
| HERVHF88  | "Homo sapiens,Pan paniscus"                            |
| HERVHF89  | "Homo sapiens,Pan paniscus"                            |
| HERVHF90  | "Homo sapiens,Pan paniscus"                            |
| HERVHF91  | "Homo sapiens,Pan paniscus"                            |
| HERVHF92  | "Homo sapiens,Pan paniscus"                            |
| HERVHF93  | "Homo sapiens,Pan paniscus"                            |
| HERVHF94  | "Homo sapiens,Pan paniscus"                            |
| HERVHF95  | "Homo sapiens,Pan paniscus"                            |
| HERVHF96  | "Homo sapiens,Pan troglodytes"                         |
| HERVHF97  | "Homo sapiens,Pan troglodytes"                         |
| HERVHF98  | "Homo sapiens,Pan troglodytes"                         |
| HERVHF99  | "Homo sapiens,Pan troglodytes"                         |
| HERVHF100 | "Homo sapiens,Pan troglodytes"                         |
| HERVHF101 | "Homo sapiens,Pongo abelii"                            |
| HERVHF102 | "Homo sapiens,Pongo abelii"                            |
| HERVHF103 | "Homo sapiens,Pongo abelii"                            |
| HERVHF104 | "Homo sapiens,Pongo abelii"                            |
| HERVHF105 | "Homo sapiens,Pongo abelii"                            |
| HERVHF106 | "Homo sapiens,Pongo abelii"                            |
| HERVHF107 | "Homo sapiens,Pongo abelii"                            |
| HERVHF108 | "Homo sapiens,Pongo abelii"                            |
| HERVHF109 | "Homo sapiens,Pongo abelii"                            |
| HERVHF110 | "Homo sapiens,Pongo abelii"                            |
| HERVHF111 | "Homo sapiens,Pongo abelii"                            |
| HERVHF112 | "Homo sapiens,Pongo abelii"                            |
| HERVHF113 | "Homo sapiens,Pongo abelii"                            |
| HERVHF114 | "Homo sapiens,Pongo abelii"                            |
| HERVHF115 | "Homo sapiens,Pongo abelii"                            |
| HERVHF116 | "Homo sapiens,Pongo abelii"                            |
| HERVHF117 | "Homo sapiens,Pongo abelii"                            |
| HERVHF118 | "Homo sapiens,Gorilla gorilla gorilla"                 |
| HERVHF119 | "Homo sapiens,Gorilla gorilla gorilla"                 |
| HERVHF120 | "Homo sapiens,Gorilla gorilla gorilla"                 |
| HERVHF121 | "Homo sapiens,Pan paniscus,Gorilla gorilla gorilla"    |
| HERVHF122 | "Homo sapiens,Pan paniscus,Gorilla gorilla gorilla"    |
| HERVHF123 | "Homo sapiens,Pan paniscus,Gorilla gorilla gorilla"    |
| HERVHF124 | "Homo sapiens,Pan troglodytes,Gorilla gorilla gorilla" |
| HERVHF125 | "Homo sapiens,Pan troglodytes,Gorilla gorilla gorilla" |
| HERVHF126 | "Homo sapiens,Pan troglodytes,Gorilla gorilla gorilla" |
| HERVHF127 | "Homo sapiens,Pongo abelii,Gorilla gorilla gorilla"    |
| HERVHF128 | "Homo sapiens,Pongo abelii,Gorilla gorilla gorilla"    |
| HERVHF129 | "Homo sapiens,Pongo abelii,Gorilla gorilla gorilla"    |

|            |                                                                                                                                                                                                                                                                                                                                       |
|------------|---------------------------------------------------------------------------------------------------------------------------------------------------------------------------------------------------------------------------------------------------------------------------------------------------------------------------------------|
| HERVHF130  | "Homo sapiens,Pongo abelii,Gorilla gorilla gorilla"                                                                                                                                                                                                                                                                                   |
| HERVHF131  | "Homo sapiens,Pongo abelii,Gorilla gorilla gorilla"                                                                                                                                                                                                                                                                                   |
| HERVHF132  | "Homo sapiens,Pongo abelii,Gorilla gorilla gorilla"                                                                                                                                                                                                                                                                                   |
| HERVHF133  | "Homo sapiens,Pongo abelii,Gorilla gorilla gorilla"                                                                                                                                                                                                                                                                                   |
| HERVHF134  | "Homo sapiens,Pongo abelii,Gorilla gorilla gorilla"                                                                                                                                                                                                                                                                                   |
| HERVHF135  | "Homo sapiens,Pongo abelii,Gorilla gorilla gorilla"                                                                                                                                                                                                                                                                                   |
| HERVHF136  | "Homo sapiens,Pongo abelii,Gorilla gorilla gorilla"                                                                                                                                                                                                                                                                                   |
| HERVHF137  | "Homo sapiens,Pongo abelii,Gorilla gorilla gorilla"                                                                                                                                                                                                                                                                                   |
| HERVHF138  | "Homo sapiens,Pongo abelii,Gorilla gorilla gorilla"                                                                                                                                                                                                                                                                                   |
| HERVHF139  | "Homo sapiens,Pongo abelii,Gorilla gorilla gorilla"                                                                                                                                                                                                                                                                                   |
| HERVHF140  | "Homo sapiens,Pongo abelii,Gorilla gorilla gorilla"                                                                                                                                                                                                                                                                                   |
| HERVHF141  | "Homo sapiens,Hylobates pileatus,Pongo abelii"                                                                                                                                                                                                                                                                                        |
| HERVHF142  | "Homo sapiens,Pan troglodytes"                                                                                                                                                                                                                                                                                                        |
| HERVHF143  | "Homo sapiens,Pan troglodytes"                                                                                                                                                                                                                                                                                                        |
| HERVHF144  | "Homo sapiens,Pan paniscus,Pan troglodytes"                                                                                                                                                                                                                                                                                           |
| HERVHF145  | "Homo sapiens,Pan paniscus,Pongo abelii"                                                                                                                                                                                                                                                                                              |
| HERVHF146  | "Homo sapiens,Pan paniscus,Pongo abelii"                                                                                                                                                                                                                                                                                              |
| HERVHF147  | "Homo sapiens,Pan paniscus,Pongo abelii"                                                                                                                                                                                                                                                                                              |
| HERVHF148  | "Homo sapiens,Hylobates pileatus,Gorilla gorilla gorilla"                                                                                                                                                                                                                                                                             |
| HERVHF149  | "Homo sapiens,Hylobates pileatus,Gorilla gorilla gorilla"                                                                                                                                                                                                                                                                             |
| HERVHF150  | "Homo sapiens,Hylobates pileatus,Gorilla gorilla gorilla"                                                                                                                                                                                                                                                                             |
| HERVHF151  | "Homo sapiens,Pan paniscus,Pongo abelii,Gorilla gorilla gorilla"                                                                                                                                                                                                                                                                      |
| HERVHF152  | "Homo sapiens,Pan troglodytes,Trachypithecus crepusculus,Gorilla gorilla gorilla"                                                                                                                                                                                                                                                     |
| HERVHF153  | "Homo sapiens,Hylobates pileatus,Pan paniscus"                                                                                                                                                                                                                                                                                        |
| HERVHF154  | "Homo sapiens,Hylobates pileatus,Pongo abelii"                                                                                                                                                                                                                                                                                        |
| HERVHF155  | "Homo sapiens,Pan paniscus,Pongo abelii"                                                                                                                                                                                                                                                                                              |
| HERVHF156  | "Homo sapiens,Pan paniscus,Pan troglodytes,Pongo abelii"                                                                                                                                                                                                                                                                              |
| HERVHF157  | "Homo sapiens,Hoolock leuconedys,Nomascus siki,Pongo pygmaeus,Gorilla gorilla gorilla"                                                                                                                                                                                                                                                |
| HERVHF158  | "Homo sapiens,Hylobates pileatus,Pongo abelii,Gorilla gorilla gorilla"                                                                                                                                                                                                                                                                |
| HERVHF159  | "Homo sapiens,Hylobates pileatus,Pongo abelii,Gorilla gorilla gorilla"                                                                                                                                                                                                                                                                |
| HERVHF160  | "Homo sapiens,Cercopithecus albogularis,Cercocebus atys,Lophocebus aterrimus,Macaca silenus,Mandrillus leucophaeus,Pan paniscus,Pygathrix nigripes,Papio hamadryas"                                                                                                                                                                   |
| HERVHF161  | "Homo sapiens,Cercocebus atys,Cercopithecus albogularis,Cercopithecus mona,Chlorocebus aethiops,Chlorocebus sabaeus,Colobus guereza,Erythrocebus patas,Lophocebus aterrimus,Macaca mulatta,Macaca silenus,Mandrillus leucophaeus,Pongo abelii,Pygathrix nigripes,Rhinopithecus roxellana,Rhinopithecus strykeri,Theropithecus gelada" |
| HERVIPADP1 | "Homo sapiens,Pan troglodytes,Pongo abelii,Gorilla gorilla gorilla"                                                                                                                                                                                                                                                                   |
| HERVK1     | "Homo sapiens,Pan paniscus,Pan troglodytes"                                                                                                                                                                                                                                                                                           |
| HERVK2     | "Homo sapiens,Hylobates pileatus,Pan paniscus"                                                                                                                                                                                                                                                                                        |
| HERVK3     | "Homo sapiens,Pan paniscus,Pan troglodytes,Pongo abelii,Pongo pygmaeus,Gorilla gorilla gorilla"                                                                                                                                                                                                                                       |

|           |                                                                                                  |
|-----------|--------------------------------------------------------------------------------------------------|
| HSERVIII1 | "Homo sapiens,Gorilla gorilla gorilla"                                                           |
| HSERVIII2 | "Homo sapiens,Gorilla gorilla gorilla"                                                           |
| HUERSP1   | "Homo sapiens,Cercocebus atys,Macaca mulatta,Macaca nemestrina,Macaca silenus,Mandrillus sphinx" |

**Supplementary data S4 The alignments of the 5LTR and flanking sequences of a widely vertical transmitted HERV-H in 17 species**

>Cercopithecus\_atys-HERVHF\_3LTR+flanking(-)

```
-----ATA
TGTTGGCTTGTCTTTTCATCCCTTA-----ACAGTACCTCTTACAACCAGATGTGATGAATTTTAAT
GAAGCCAAACTTACCAATTTTTTCT-----TTCATGGATCATGCTTTTGGTGTCTGATCTAAA
AAGTCATTGCCAAACCTTAGGCTTTCTCTTATGTTATCCTTAAAAGTTTAATAGGTGTGTGG
TTTACACTTAGGTTTATCATCCCGTTTTGACTTA-TTTTTTGTGAAGCGTGTAAGTCTGTGTCT
ATATGCATTTGTTGGCATGTGTATCTGGTCATCACAGCACTGTTTGTGAAAAGACTGTATTT
CTCCATTAGGCTGCCTTTGCTCTTTTGTCAAAGATCAGTCGATTACATTTGTAGAGTCTATTT
CTGGGCTCTCTGATCTGGAGGAAAAAGGTCTGTGATTGCCAGGGATTGGAGGGACAAAA
GGCATGATCTTGGCTCACTGCAACCTCCACCT-CCCAGGTTCAAGGGATTCTCCTGCCTCAG
CCTCCTGAGTAGCTAGGATTTCAAGGTGTGTACCACCATGCCCTGATAA-TTTTTGTATTTGT
CTATTATTTTTCTAATACCACACTGTCTGTTACTGCAGCTTTGTAGCAAGTCTTGAAGTCCTC
TAAGTTTTTCTCCTAGATGTTATATTAATACTATTCTGAGCCTTGCCTTTCAATCTACGTTTGAGA
ATGTGATTGTCAATATTCACAAAATAACTTGCTGGGACTTTGATTGGGATTGCACCGAATCT
GTGGATCAAATTGGGAAGAACTGATAGCAATATCGTGTCTTTCTATCCATAAACATGGAATAT
CTTTCCATTTATTTAGATCTTTTGTATTATTCATTAGAGTTTTGTAGTTCTCCTCACATAGATTT
TGAACATGTGTTGTTAGATTTGTACCTAAGTATTTCAATTTTCTTGGTGCTAATATAAATAGTA
TTATCTTTTTAATATCGAATTTCAACTAGTCATTATCGATATATAGAAAAGCAATGACTTGTGT
ATATTAATCTTGCATCTTGCAACCTTGTATAATCATTTATTAGTCTCAGGAGGG-TTTTTTGT
GATGTGGGGGGGATTTTCTACGGATACAATCATGTCATCTT-AAAAAAAAGACG--TTCATTTCT
TCCTTTCTAATCTGTGTGCCTTTTATTTTCTTTCCTTGTCTTATTGCATTCGCTAGGACTTTCA
GTACAATGTATAAAAATCAGTGGTATAAATGTAAATAATTACTATTTATTGTGAAAGAAAAATA
TCTTGGGGCCCCAACATCACTAAGCTAAAGGGAAAAAGTCAAGCTGGGAACTGCTTAGGGTA
AACCTGCCTCCCATTCTATTCAAAGTCATCCCTCTGCTCACTGAGATAAATGCATATCTGATT
GCCTCCTTTGGAGAGGCTCATCAGAAATGCAGAAGAATGCAACCATTTGTCTCTCACCTGC
TTGTGACCTGGAAGCTCCCTCCCCCTTCAAGTTGTGACCTGGAAGCCTCCTCCCCCTTC
ACGTTGTCCTGACTTTGCATAGATTGTGGACCAAACCAATGTTTCATGTTACACATGTTGATT
GATGTCTCCTCTCTCCCTAAAATATGTAAAACCAAGCTGTGTTCTGACTGTCAGGCCCTCTGA
GCCAAGCTAAGCCATCATATCCCTGTGACTTGCACATACACATCCAGATGGCCTGAAGTA
ACTGAAG-GATTACAAAAGAAGTGAAAATGGCCTGTTTCTGCCTTAAC--TGATGACATTACC
TTATG---AAATTCCTTCTCCTGGCTCATCCTGGCTCAAAAGTTCCCCCACTGAGCACCTTGTG
ACCCCCACCCCTGCCAGCCAGAAAACAACCCCTTTGACTGTAATTTCCACCACCCACCC
AAATCTTATAAAACAGCCCCA-CCCTATCTCCCTTCGCTGACTCTCTTTTCGGATCCAGCCCG
CCTGCACTCAGGTGAAATAAACAGCCTTGTTGCTCACACAAAGCCTGTTTGGTGGTCTCTT
CACACAGAC-----
```

>Cercopithecus\_mitis-HERVHF\_3LTR+flanking(-)

```
-----ATCTTTTTCTT
CCAATATGTGGCTTGTCTTTTCATCCCTTA-----ACAGTACCTCTCACAACCAGATGTGATGAA
```

TTTAAATGAAGCCAAACTTTTTTGTCTTTCT-----TTCATGGATCATGCTTTTGGTGTCTGTA  
TCTAAAAAGTCATTGCCAAACCCTTAGGCTTTCTCTTATGTTATCCTTAAAAAGTTAATAGGT  
TTGTGGTTTACACTTAGGTTTATGATCCCCTTTTGACTTA-TTTTTGTGAAGCGTGTAAGTCT  
GTGTCTATATGCATTTGTTGGCATGTGTATCTGGTCATCACAGCACTGTTTGTGAAAAGACT  
ATATTTCTCCATTAGGCTGCCTTTGCTCTTTTGTCAAAGATCAGTCGATTATAATTGTAGAGTC  
TATTTCTGGGCTTTCTGATCTGGAGGAAAAAGATCTGTGGTTGCCAGGGATTGAGGGGAC  
AAAAGGCATGATCTTGGCTCACTGCAACCTCCACCTCCCCGGGTTCAAGGGATTCTCCTGC  
CTCAGCCTCCTGAGTAGCTAGGATTTAGGTGCGTACCACCATGCCCTGCTAATTTTTTGTAT  
TTTGTCTATTATTTTTCTAATACCACACTGTCTGTTACTGCAGCTTTGTAGCAAGTCTTGAAG  
TCCTCTAAGTTTTTCTCCTAGATGTTATATTAATACTATTCTGAGCTTTGCCTTTCAATCTACGTT  
TGAGAATGTGATTGTCAATATTCACAAAATAACTTGCTGGGATTTTGATTGTGATTGCACCG  
AATCTGTGGATCAAATTGGGAAGAACTGATAATAATATCGTGTCTTTCTATCCATAAACATGG  
AATATCTTTCCATTATTTAGATCTTTTGTATTATTCATTAGAGTTTGTAGTTCTCCTCACATA  
GATTTTGAACATGTGTTGTTAGATTGTACCTAAGTATTTCAATTTTCTTGGTGCTAATATAAA  
TAGTATTATCTTTTAAATATCGAATTTCAACTAGTCATTATCGATATATAGAAAAGCAATGACT  
TGGTATATTAATCTTGCATCTTGCAACCTTGTATAATCATTATTAGTCTCAGGAGGG-TTTT  
TTGTTGATGTGGGGGGATTTTCTACGGATACAATCATGTCATCTT-AAAAAAGACG--TTCA  
TTTCTTCCTTTCTAATCTGTGTGCCTTTTATTTTCTTTCTTGTCTTATTGCATTGCTAGGACT  
TTCAGTACAATGTAAAAATCAGTGGTATAAATGTAAATAATTACTATTTCTTGTGAAAGAAA  
AATATCTTGGGCCCCCAACATCACTAAGCTAAAGGGAAAAGTCAAGCTGGGAAGTGTCTAG  
GGTAAACCTGCCTCCCATTTCTATTCAAAGTCATCCCTCTGCTCACTGAGATAAATGCATATCT  
GATTGCCTCCTTTGGAGAGGCTTATCAGAAATGCAGAAGAATGCAACCATTGTCTCTCACC  
TACTTGTGACCTGGAAG-----CCCCCTCCCCCTTCAAGTTGTCTGACT  
TTGCATAGATTGTGGACCAACCAATGTTTCATGTTACACATGTTGATTGATGTCTCCTCTCTC  
CCTAAAATATGTAAAACCAAGCTGTGTTCTGACTGTCAGGCCTCTGAGCCCAAGCTAAGCC  
ATCATATCCCCTGTGACCTGCACATATACATCCAGATGGCCTGAAGTAACTGAAG-GATCACA  
AAAGAAGTGAAAATGGCCTGTTCTGCCTTAAC--TGATGACATTACCTTATG---AAATTCCTT  
CTCCTGTCTCATCTGGCTCAAAAGCTCTCCCACTGAGCACCTCGTGACCCCCACCCATGCC  
AGCCAGAAAACAACCCCTTTGACTGTAATTTTCTCTACCTACCCAAATATTATAAAACAG  
CCCCACCCCTATCTCCCTTCGCTGACTCTCTTTTCGGATCCAGCCCGCCTGCACCCAGGTGA  
AATAACAGCCTTGTGCTCACACAAAGCCTGTTTGGTGGTCTCTTCACACAGATGGTGTG  
ACTCAGATC

>Cercopithecus\_mona-HERVHF\_3LTR+flanking(-)

-----TTATCACACGTGTGGTTTGAA  
AATCTTTTTCTTCCAATATGTGGCTTGTCTTTTCATCCCTTA-----ACAGTACCTCTCACAACCA  
GATGTGATGAATTTAATGAAGCCAAACTTACCAAGTTTTTCT-----TTCATGGATCATGCT  
TTTGGTGTCTATCTAAAAAGTCATTGCCAAACCCTTAGGCTTTCTCTTATGTTATCCTTAAA  
AGTTTAATAGGTTTGTGGTTTACACTTAGGTTTATGATCCCGTTTTGACTTA-TTTTTGTGAA  
GCGTGTAAGTCTGTGTCTATATGCATTTGTTGGCAAGTGTATCTGGTCATCATAGCACTGTTT  
GTTGAAAAGACTATATTTCTCCATTAGGCTGCCTTTGCTCTTTTGTCAAAGATCAGTGGATTA  
TATTTGTAGAGTCTATTTCTGGGCTCTCTGATCTGGAGGAAAAAGATCTGTGGTTGCCAGGG  
ATTTGGAGGGACAAAAGGCATGATCTTGGCTCACTGCAACCTCCACCT-CCCGGGTTCAAG  
GGATTCTCCTGCCTCAGCCTCCTGAGTAGCTAGGATTTAGGTGCGTACCACCATGCCCTGC

TAA-TTTTTGTATTTTGTCTATTATTTTTCTAATACCACACTGTCTGTTACTGCAGCTTTGTAGC  
AAGTCTTGAAGTCCTCTAAGTTTTTCTCCTAGATGTTATATTAAGTATTCTGAGCCTTGCCTTT  
CAATCTACGTTTGAGAATGTGATTGTCAATATTCACAAAATAACTTGCTGGGATTTTGATTGG  
AATTGCACCGAATCTGTGGATCAAACCTGGGAAGAACTGGTAATAATATCGTGTCTTTCTATC  
CATAAACATGGAATATCTTTCCATTTATTTAGATCTTTTGTTTATTTTCATTAGAGTTTGTAGTT  
CTCCTCACATAGATTTTGAACATGTGTTGTTAGATTTGTACCTAAGTATTTTCATTTTTCTTGGT  
GCTAATATAAATAGTATTATCTTTTAAATATCGAATTTCAACTAGTCATTATCGATATATAGAAA  
AGCAATGACTTGTGTATATTAATCTTGCATCTTGCAACCTTGTTATAATCATTATTAGTCTCA  
GGAGGG-TTTTTTGTGATGTGGGGGGATTTTCTACGGATACAATCATGTCATCTT-AAAAAA  
AAGACG--TTCATTTCTTCCTTTCTAATCTGTGTGCCTTTTATTTT-----CTTGTCTTATTGCATTC  
GCTAGGACTTTTCAGTACAATGTTAAAAATCAGTGGTATAAATGTAAATAATTACTATTTATTGT  
GAAATAAAAAATATCTTGGGCCCCCAACATCACTAAGCTAAAGGGAAAAGTCAAGCTGGGAA  
CTGCTTAGGGTAAACCTGCCTCCCATTCTATTCAAAGTCATCCCTCTGCTCACTGAGATAAAT  
GCAGATCTGATTGCCTCCTTTGGAGAGGCTCATCAGAAATGCAGAAGAATGCAACCATTG  
TCTCTCACCTACTTGTGACCTGGAAG-----CCCCCTCCCCCTTCAAGTT  
GTCTGACTTTGCATAGATTGTGGACCAACCAATGTTTCATGTTACACATGTTGATTGATGTC  
TCCTCTCTCCCTAAAATATGTAAAACCAAGCTGTGTTCTGACTGTCAGGCCTCTGAGCCCCAA  
GCTAAGCCATCATATCCCCTGTGACCTGCACATATACATCCAGATGGCCTGAAGTAACTGAA  
G-GATCACAAAAGAAGTGAAAATGGCCTGTTCTGCCTTAAC--TGATGACATTACCTTATG---  
AAATTCCTTCTCCTGTCTCATCCTGGCTCAAAAGCTCTCCCACTGAGCACTTCGTGACCCCC  
ACCCCTGCCAGCCGGAAAACAACCCCTTTGACTGTAATTTTCCACTACCTACCCAAATATT  
ATAAAACAGCCCCACCCCTATCTCCCTTCGCTGACTCTCTTTTCGGATCCAGCCCGCCTGCA  
CCCAGGTGAAATAAACAGCCTTGTGCTCACACAAAGCCTGTTTGGTGGTCTCTTCACACA  
GAC-----

>Chlorocebus\_aethiops-HERVHF\_5LTR+flanking(+)

-----CTTTATCACACGTGTGGTTTGA  
AAATCTTTTTCTTCCAATATGTGGCTTGTCTTTTCATCCCTTA-----ACAGTACCTCTCACAACC  
AGATGTGATGAATTTTAATGAAGCCAAACTTACCAATTTTTTCT-----TTCATGGATCATGC  
TTTTGGTGTGCTACCTAAAAAGTCACTGCCAAACCCTTAGGCTTTCTCTTATGTTATCCTTAA  
AAGTTTAATAGGTTTGTGGTTTACACTTAGGTTTATGATCCCGTTTTGATTTA-TTTTTTGTGA  
AGCGTGTAAGTCTGTGTCTATGTACATTTGTTGGCATGTGTATCTGGTCATCACAGCGCTGTT  
TGTTGAAAAGACTATATTTCTCCATTAGGCTGCCTTTGCTCTTTTGTCAAAGATCAGTCGATT  
ATATTTGTAGAGTCTATTTCTGGGCTCTCTGATCTGGAGGAAAAAGATCTGTGGTTGCCAGG  
GATTTGGAGGGACACAAGGCATGATCTTGGCTCACTGCAACCTCCACCT-CCCGGGTTCAAG  
GGATTCTCCTCCCTCAGCCTCCTGAGTAGCTAGGATTTTCAGGTGCATACCACCATGCCCTGC  
TAA-TTTTT-TATTTTGTCTATTATTTTTCTAATACCACACTGTCTGTTACTGC-----TAGCAAGT  
CTTGAAGTCCTCTAAGTTTTTCTCCTAGATGTTATATTAAGTATTCTGAGCCTTGCCTTTCAAT  
CTACGTTTGAGAATGTGATTGTCAATATTCACAAAATAACTTGCTGGGATTTTGATTGGGATT  
GCATCGAATCTGTGGATCAAATTGGGAAGAACTGATAATAATATCGTGTCTTTCTATCCATAA  
ACATGGAATATCTTTCCATTTATTTAGATCTTTTGCTTATTTTCATTAGAGTTTGGTAGTTCTCCT  
CACATAGATTTTGAACATGTGTTGTTAGATTTGTACCTAAGTATTTTCATTTTTCTTGGTGCTAA  
TATAAATAGTATTATCTTTTAAATATCGAATTTCAACTAGTCATTATCGATATATAGAAAAGCAA  
TGACTTGTGTATATTAATCTTGCATCTTGCAACCTTGTTATAATCATTATTAGTCTCAGGAGG

G-TTTTTTGTTGATGTGGGGGGATTTTCTACGGATACAATCATGTCATCTT-TAAAAAAGACG  
 --TTCATTTCTTCCTTTCTAATCTGTGTGCCTTTTATTTTCTTTCCTTGTCTTATTGCATTCACTA  
 GGACTTTCAGTACAATGTTAAAAATCAGTGGTATAAATGTAAATAATTACTATTTATTGTGAA  
 AGAAAAATATCTTGGGCCCCAACATCACTAAGCTAAAGGGAAAAGTCAAGCTGGGAAC  
 GCTTAGGGTAAACCTGCCTCCCATTCTATTCAAAGTCATCCCTCTGCTGGCTGAGATAAATG  
 CATATCTGATTGCCTCCTTTAGAGACGCTCATCAGAAATGCAGAAGAATGCAACCATTTGTC  
 TCTCACCTACTTGTGACCTGGAAG-----ACGCCTCCCCTCTTCAAGTTGT  
 CCTGACTTTGCATAGATTGTGGACCAAACCAATGTTTCATGTTACACATGTTGATTGATGTCTC  
 CTCTCTCCCTAAAAATATGTAAACCAAGCTGTGTTCTGACTGTCAGGCCTCTGAGCCCAAGC  
 TAAGCCATCATATCCCCTGTGACCTGCACATATACATCCAGATGGCCTGAAGTAACTGAAG-G  
 ATCACAAAAGAAGTGAAAATGGCCTGTTCTGCATTAAC--TGATGACATTACCTTATG---AA  
 ATTCCTTCTCCTGTCTCATCCTGGCTCAAAAGCTCTCCCACTGAGCACCTCGTGACCCCCAC  
 CCCTGCCAGCCGGAACAACCCCTTTTGACTGTAATTTTCCACTACCTACCCAAATATTATA  
 AAACAACCCCAACCCCTATCTCCCTTCGCTGACTCTCTTTTCGGATCCAGCCCGCCTCCACCT  
 AGGTGAAATAAACAGCCTTGTTGCTCCCAAAAGCCTGTTTGGTGGTCTCTTCACACAGAC  
 G-----

>Chlorocebus\_sabaeus-HERVH\_3LTR+flanking(-)

-----CTTTATCACACGTGTGGTTTGA  
 AAATCTTTTCTTCCAATATGTGGCTTGTCTTTTCATCCCTTA-----ACAGTACCTCTCACAACC  
 AGATGTGATGAATTTTAATGAAGCCAACTTACCAATTTTTTCT-----TTCATGGATCATGC  
 TTTTGGTGTCTGACCTAAAAAGTCACTGCCAAACCCTTAGGCTTCTCTTATGTTATCCTTAA  
 AAGTTTAATAGGTTTGTGGTTTACACTTAGGTTTATGATCCCGTTTGTATTATTTTTTGTGA  
 AGCGTGTAAGTCTGTGTCTATGTGCATTTGTTGGCATGTGTATCTGGTCATCACAGCGCTGTT  
 TGTGAAAAGACTATATTTCTCCATTAGGCTGCCTTTGCTCTTTTGTCAAAGATCAGTCGATT  
 ATATTTGTAGAGTCTATTTCTGGGCTCTCTGATCTGGAGGAAAAAGATCTGTGGTTGCCAGG  
 GATTTGGAGGGACACAAGGCATGATCTTGGCTCACTGCAACCTCCACCT-CCCGGGTTCAAG  
 GGATTCTCCTCCCTCAGCCTCCTGAGTAGCTAGGATTTTCAAGGTGCATACCACCATGCCCTGC  
 TAA-TTTTT-TATTTTGTCTATTATTTTCTAATACCACACTGTCTGTTACTGC-----TAGCAAGT  
 CTTGAAGTCTCTAAGTTTTTCTCCTAGATGTTATATTAATACTATTCTGAGCCTTGCCTTTCAAT  
 CTACGTTTGAGAATGTGATTGTCAATATTCACAAAATAAATTGCTGGGATTTTGATTGGGATT  
 GCATCGAATCTGTGGATCAAATTGGGAAGAAGTGAATAATATCGTGTCTTTCTATCCATAA  
 ACATGGAATATCTTTCCATTATTTAGATCTTTTGCTTATTTTCAATTAGAGTTTGTAGTTCTCCT  
 CACATAGATTTTGAACATGTGTTGTTAGATTTGTACCTAAGTATTTTCAATTTTCTTGGTGCTAA  
 TATAAATAGTATTATCTTTTAAATATCGAATTTCAACTAGTCATTATCGATATATAGAAAAGCAA  
 TGACTTGTGTATATTAATCTTGCATCTTGCACCTTGTATAATCATTATTAGTCTCAGGAGG  
 G-TTTTTTGTTGATGTGGGGGGATTTTCTACGGATACAATCATGTCATCTT-AAAAAAAGAC  
 G--TTCATTTCTTCCTTTCTAATCTGTGTGCCTTTTATTTTCTTTCCTTGTCTTATTGCATTCACT  
 AGGACTTTCAGTACAATGTTAAAAATCAGTGGTATAAATGTAAATAATTACTATTTATTGTGA  
 AAGAAAAATATCTTGGGCCCCAACATCACTAAGCTAAAGGGAAAAGTCAAGCTGGGAAC  
 TGCTTAGGGTAAACCTGCCTCCCATTCTATTCAAAGTCATCCCTCTGCTGGCTGAGATAAAT  
 GCATATCTGATTGCCTCCTTTAGAGACGCTCATCAGAAATGCAGAAGAATGCAACCATTTGT  
 CTCTCACCTACTTGTGACCTGGAAG-----ACGCCTCCCCTCTTCAAGTTG  
 TCCTGACTTTGCATAGATTGTGGACCAAACCAATGTTTCATGTTACACATGTTGATTGATGTCT

CCTCTCTCCCTAAAATATGTAAAACCAAGCTGTGTTCTGACTGTCAGGCCTCTGAGCCCAAG  
 CTAAGCCATCATATCCCCTGTGACCTGCACATATACATCCAGATGGCCTGAAGTAACTGAAG-  
 GATCACAAAAGAAGTGAAAATGGCCTGTTCCCTGCATTAAC--TGATGACATTACCTTATG---A  
 AATTCCTTCTCCTGTCTCATCCTGGCTCAAAAGCTCTCCCACTGAGCACCTCGTGACCCCCA  
 CCCCTGCCAGCCGGAAAACAACCCCCTTTGACTGTAATTTTCCACTACCTACCCAAATATTAT  
 AAAACAACCCCACCCCTATCTCCCTTCGCTGACTCTCTTTTCGGATCCAGCCCGCCTCCACC  
 CAGGTGAAATAAACAGCCTTGTTGCTCCCACAAAGCCTGTTTGGTGGTCTCTTCACACAGA  
 C-----

>Colobus\_guereza-HERVHF\_3LTR+flanking(-)

-----GAACCTCACCCGAGAGCGCAGCGTG  
 ACTTC-----CCTGGCTCCCCACACCTGAGGACCAGAGAACCTCACC-GAGAGT  
 GTGTGCATATTTGCAATAA---AAGGCTGCCGCTTCTTATGTACTTTGGCCTCATGTTTAATT  
 ACTTAGCTCTCCTAAATTAAGTTACATTAATTAATTAAGA---CACTTACGTTATCCTTAAA  
 AGTTTAATAGTTTTGTGGTTTACACTTAGGTTTATCATCCCGTTTTGACTTA-TTTTTTGTGAA  
 GTGTGTAAGTCTGTGTCTATATGCATTTGTTGGCAGGTGTATCTGGTCATCACAGCACCGTTT  
 GTTGAAGAAAGACTATCTTTCTCCATTAGATTGCCTTTGCTCTTTTGTCAAAGATCAGTCAATTG  
 TATTTGTAGAGTCTATTTCTGGGCTCTCTGATCTGGAGGAAAAAGTTTTGTGGTTGCCAGAG  
 ATTTGGAGGGACACAAGGCATGATCTTCACTCACTGCAACCTCCACTT-CCCAGGTTCAAGG  
 GATTCTCCTGCCTCAGCCTCCTGAGTAGCTAGGATTTAGGTGCATACCACCATGCCCTGCT  
 AA-TTTTTGTATTTTGTCTATTATTTTCTAATACCACACTGTCTGTTACTGCAGCTTTGTAGCA  
 AGTCTTGAAGTCCTCCAAGTTTTTCTCCTGGATGTTATATTAATCTGAGCCATACCTTT  
 CAATCTACGTTTGAGAATGTGATTGTCAATATTCACAAAATAACTTGCTGGGATTTTGATTGG  
 GATTGCACTGAATCTGTGGATCAAATTGGGAAGAACTGATAACAATATTGTGTCTTTCTATCC  
 ATAAACATGGAATATCTTTCCATTTATTTAGATCTTTTATTTATTTTATTAGAAATTTGTAGTTC  
 TCCTCACATAGATTTTGAACATATGTTGTTAGATTTGTACCTAAGTATTTTATTTTCTTGGTG  
 CTAATATAAATAGCATTATCTTTTAAATACCAAATTTCAACTATTCATTATCGACATATAGAAAA  
 GCAATGACTTGTATATATTAATCTTGCATCTTGCAACCTTGTATAATCATTTATTAGTCTCAG  
 GAGGG-TTTTTTGTGATGTGGAGGGATTTTCTATGGACACAATCATGTCATCTT-AAAAAAA  
 AGACG--TTCATTTCTTCTTTTCTAATCTGTGTGCCTTTTATTTTCTTCTTCTTATTGCATT  
 AGCTAGGACTTTTCAGTACAATGTTAAAAATCAGTGGTATAAATGTAAATAATTACTATTTATT  
 GTGAAAGAAAAATATCTTGGGCCCCCAACATCACTAAGCTAAAGGGAAAAGTCAAGCTGG  
 GAACTGCTTAGGGTAAACCTGCCTCCCATTTCTATTCAAAGTCATCCCTGTGCTCACTGAGAT  
 AAATGCATATCTGATTGCCTCTTTTGGAGAGGCTCATCAGAAATGCAGAAGAATGCAACCAT  
 TTTTCTCTCACCTACTTGTGACCTGGAAG-----CCCCCTCCCCGCTTCAA  
 GTTGTCTGAATTTGCTTAGATTGTGGACCAAACCAATGTTTCATGTTACACATGTTGATTGAT  
 GTCTCCTGTCTCCCTAAAATATTTAAAACCAAGCTGTGTTCTGACTGTCAGGCCTCTGAGCC  
 CAAGCTAAGCCATCATATCCCCTGTGACCTGCAC-TATACATCCAGATGGCCTGAAGTAACTG  
 AAG-GATCACAAAAGAAGTGAAAATGACCTGTTCCCTGCCTTAAC--TGATGACATTACCTTGT  
 G---AAATTCCTTCTCCTGGCTCATCCTGGCTCAAAAGCTCTCCCACTGAGCACCTTGTGAAC  
 CCCACCCCTGCCAGCCAGGAAAACAACCCCCTTTGACTGTAATTTTCCACTACCTACCCAAAT  
 ATTATAAAACAGCCCCGCCCTATCTCCCTT-GCTGACTCTCTTCTCAGATTCAGCCTGCCTG  
 CACCCAGGTGAAATAAACAGCCTTGTTGCTCACACAAAGTCTGTTTGGTGGTCTCTTCACA  
 CAGATGCTAGT-----



>Erythrocebus\_patas-HERVHF\_3LTR+flanking(-)

-----CCTTTATCACACGTGTGGTTTGA  
AAATCTTTTTCTTCCAATATGTGGCTTGTCTTTTCATCCCTTA----ACAGTACCTCTCACAAACC  
AGATGTGATGAATTTTAATGAAGCCAAACTTACCAATTTTTTCT-----TTCATGGATCATGC  
TTTTGGTGTGTCGTATCTAAAAAGTCATTGCCAAACCCTTAGGCTTTCTCTTATGTTATCCTTAA  
AAGTTTAATAGGTTTGTGGTTTACACTTAGGTTTATGATCCCGTTTTGACTTA-TTTTTTGTGA  
AGCGTGTAAGTCTGTGTCTATATGCATTTGTTGGCATGTGTATCTGGTCATCACAGCACTGTT  
TGTTGAAAAGACTATATTTCTCCATTAGGCTGCCTTTGCTCTTTTGTCAAAGATCAGTCGATT  
ATATTTGTAGAGTCTATTTCTGGGCTCTCTGATCTGGAGGAAAAAGATCTGTGGTTGCCAGG  
GATTTGGAGGGACACAAGGCATGATCTTGGCTCACTGCAACCTCCACCT-CCCGGGTTCAAG  
GGATTCTCCTCCCTCAGCCTCCTGAGTAGCTAGGATTTAGGTGCGTACCACCATGCCCTGC  
TAA-TTTTTGTATTTTGTCTATTATTTTCTAATACCACACTGTCTGTTACTGC-----TAGCAAG  
TCTTGAAGTCCTCTAAGTTTTTCTCCTAGATGTTATATTAACCTATTCTGAGCCTTGCTTTTCAA  
TCTACGTTTGAGAATGTGATTGTCAATATTCACAAAATAACTTGCTGGGATTTGATTGGGAT  
TGCACTGAATCTGTGGATCAAATTGGGAAGAACTGATAATAATATCGTGTCTTTCTATCCATA  
AACATGGAATATCTTTCCATTTATTTAGATCTTTTGCTTATTTTATTAGAGTTTTGTAGTTCTCC  
TCACATAGATTTTGAACATGTGTTGTAGATTTGTACCTAAGTATTTTCTTTTCTTGGTGCTA  
ATATAAATAGTATTATCTTTTTAATATCGAATTTCAACTAGTCATTATC-ATATATAGAAAAGCA  
ATGACTTGTGTATATTAATCTTGCATCTTGCAACCTTGTTATAATCATTATAGTCTCAGGAG  
GG-TTTTTTGTGATGTGGGGGGATTTTCTACGGATACAATCATGTCTCTT-AAAAAAAAGA  
CG--TTCATTTCTTCCTTTCTAATCTGTGTGCCTTTTATTTCTTTCTTGTCTTATTGCATTAC  
TAGGACTTTTCAGTACAATGTTAAAAATCAGTGGTATAAATGTAAATAATTACTATTTATTGTG  
AAAGAAAAATATCTTGGGCCCCAACATCACTAAGCTAAAGGGGAAAAGTCAAGCTGGGAA  
CTGCTTAGGGTAAACCTGCCTCCCATTCTATTCAAAGTCATACCTCTGCTGGCTGAGATAAAT  
GCATGTCTGATTGCCTCCTTTAGAGATGCTCATCAGAAATGCAGAAGAATGCAACCATTTGT  
CTCTCACCTACTTGTGACCTGGAAG-----ACCCCTCCCCCTTCAAGTTG  
TCCTGACTTTGCATAGATTGTGGACCAAACCAATGTTTCATGTTACACATGTTAATTGATGTCT  
CCTCTCTCCCTAAAATATGTAAAACCAAGCTGTGTTCTGACTGTCAAGCCTCTGAGCCCAAG  
CTAAGCTATCATATCCCCTGTGACCTGCACATATACATCCAGATGGCCTGAAGTAACTGAAG-  
GATCACAAAAGAAGTGAAAATGGCCTGTTCTGCTTAAAC--TGATGACATTACCTTATG---A  
AATTCCTTCTCCTGTCTCATCCTGGCTCAAAGCTCTCCCACTGAGCACCTTGTGACCCCCA  
CCCCTGCCAGCCGGAACAACCCCTTTGACTGTAATTTTCCACTACCTACCCAAATATTAT  
AAAACAACCCACCCCTATCTCCCTTCGCTGACTCTCTTTTCGGATCCAGCCCGCCTCCACC  
CAGGTGAAATAAACAGCCTTGTTGCTCCACAAAGCCTGTTTGGTGGTCTCTTCACACAGA  
C-----

>Homo\_sapiens-HERVHF\_3LTR+flanking(-)

-----TATGCATGTACCATAGTTTATTAATCCATCTCT  
GCTTTGTATATCTTCTTTGACGAGGTGTCTGTCCAGATCTCTTGACCATTTTTAATTGGGTTG  
TTTTCTTATCGTTGAGTTTGTGTTTTTGTGTTTTAGACACGAGTCCTTTATCAGACGTGTGG  
TTTGAACATCTTTTTACCCAGTACGTGGCTTGTCTTTTCATCCCTTA----GCAGTAACTCTC  
ACAACCAGATGTGATGAATTTTAATGAAGCCAAACTTACCAATTTTTTCT-----TTCATGGA  
TCATGCTTTTGGTGTGTCGTATCTAAAAAGTCATACCAAACACTTAGGCTTTCTCTTATGTTAT  
CCTTACAAGTTTAATAGTTTTGTGGTTTACACTTAGGTTTATGATCCCATTTTACTTA-TTTTT

TGTGAAGGGTGTAAGTCTGTGTCTATATGCATTTGTTGGCATGTGTGTCTGGTCATCACAGC  
 ACCACTTATTGAAAAGACTATCTTTCTCCATTAGGTTGCCTTTGCTCTTTTGTCAAAGATCAG  
 TCGATTATATTTATAGAGCCTATTCTGGGCTCTCTGATCTG-----  
 -----TTCCATTGCTCTG-----  
 -----TTTGTCTATTATTTTGCCAATACCACACTGTCTGTTACTGCAGCTTTGTAGCAAGTCTTC  
 AGGTCCTCTAAGTTTTCTCTGGATGTTATTAATACTATTCTGAGCCTTGCCTTTTCAGTCTA  
 AGTTGAAGAATGTGATTGTCAATATTCACCAAGTAACTTGCTGAGATTTTTATTGGGATTGC  
 ACTGAATCTATAGATCAAATTGGGAAGAACTGATAACAATATCATGTCTTTCTATCCATAAAC  
 ATGGAATATCTTTCCATTATTTAGATCTTTTATTTATTTTCATTAGAGTTTTGTAGTTCTTCTCA  
 CATAGATTTTGAACATGTGTTGTTAGATTTGTACCTAAGTATTTTCTTTGGTGCTAAT--  
 ----TATTATCTTTTAAATATCAAATTTCAACTATTCATTATTGATATATAGAAAAGCAATGACTT  
 GTATGTATTAATCTTGCATCTTGCAACCTTGTTACAATCATTATTAGTCTCAGGAGGG-TTTT  
 TTGATG---TGGGGGATTTTCTACGGACACAATCACGTCATCGT-AAAAAAAAGGCACCTTAA  
 TTTCTTCTTTCTAATCTGTATGCCTTTTATTTCTTTCTTGTCTTATTGCATTAGCTAGGACT  
 TTCAGTACAATGTTAAAAATCAGTTGTATAAATGTAAATAATTATTATTTATTGCGAAAGAAA  
 AATATCTTGGGCCCCCAAATCACTAAGCGAAAGGGAAAAAGTCAAACCTGGGAACCTGCTTAC  
 GGCAAACCTGCCTCCCATCTATTCAAAGTCATCCCTCTGCTCACTGAAATAAATGCATATCT  
 GATTGCCTCCTTCGGAGAGGCTCATCAGAAACCCAGAAGAATGCAACCGTTTGTCTCTCAC  
 CTACTTGTGACCTGGAAG-----TAGCCTCCCCGCTTAGAGTTGTCCCACT  
 TTTGCTTAGATTCTGGACCAAACCAATGTTTACATATGTTGATTGATGTCTCATGTCTC  
 CCTAAAATGTATAAAACCAAGCTGTGTTCTGACTGTCAGGGCTCTGAGCACAAGCTAAGCC  
 ATCGTATCCCATGTGACCTGGAAGTATATATCCAGATGGCCTAAAGTAACTGAAG-AATCACA  
 AAAGAAGTGAAAATAGTCTGGTCTGCCTTAAC--TGATGATATTACCTTGTG---AAATTCCTT  
 CTCCTGGCTCATCCTGGCTCAAAAGCTCCCCCACTGAGCACCTTGTGACCCCCACCCCTGC  
 CAGCCATAAAACAACCCCTTTGACTGTAATTTTCCACTACCTACCTAAATCCTATAAAACG  
 GCCCCACCCCTATCTCCCTTCCCTGACTCTCTTTTCGGATTTCAGCCCGCTGCACCCAGGTG  
 AAATAAACAGCCTTGTTGCTCACACAAAGCCTGTTTGGTGGTCTCTTCATACAGACGCGAG  
 TGAA-----

>Lophocebus\_aterimus-HERVHF\_3LTR+flanking(-)

-----ATCACACGTGTGGTTTGAAA  
 ATCTTTTCTTCCAATATGTGGCTTGTCTTTTCATCCCTTA-----ACAGTACCTCTCACAACCAG  
 ATGTGATGAATTTTAAATGAAGCCAAACTTACCAATTTTTTCT-----TTCATGGATCATGCTTT  
 TGGTGTCTGATCTAAAAAGTCATTGCCAAACCCTTAGGCTTTCTCTTATGTTATCCTTAAAG  
 TTTAATAGGTGTGTGGTTTACACTTAGGTTTATGATCCCGTTTTGACTTA-TTTTTTGTGAAGC  
 GTGTAAGTCTGTGTCTATATGCATTTGTTGGCATGTGTATCTGGTCATCACAGCACTGTTTGT  
 TGAAAAGACTATATTTCTCCATTAGGCTGCCTTTGCTCTTTTGTCAAAGATCAGTCGATTATA  
 TTTGTAGAGTCTATTTCTGGGCTCTCTGATCTGGAGGAAAAAGGTCTGTGATTGCCAGGGAT  
 TTGGAGGGACAAAAGGCATGATCTTGGCTCACTGCAACCTCCACCT-CCCGGGTTCAAGGG  
 ATTCTCCTGCCTCAGCCTCCTGAGTAGCTAGGATTTCAAGTGCGTACCACCATGCCCTGATA  
 A-TTTTTGTATTTTGTCTATTATTTTCTAATACCACACTGTCTGTTACTGCAGCTTTGTAGCAA  
 GTCTTGAAGTCCTCTAAGTTTTTCTCCTAGATGTTATTAATACTATTCTGAGCCTTGCCTTTCA  
 ATCTACATTGAGAATGTGATTGTCAATATTCACAAAATAAAGTTGCTGGGATTTTGATTGGGA  
 TTGTACCGAATCTGTGGATCAAATTGGGAAGAACTGATAGCAATATCGTCTCTTTCTATCCAT

AAACATGGAATATCTTTCCATTIATTTAGATCTTTTGTTTATTTTCATTAGAGTTTTGTAGTTCTC  
 CTCACATAGATTTTGAACATGTGTTGTAGATTTGTACCTAAGTATTTTCATTTTTCTTGGTGCT  
 AATATAAATAGTATTAGCTTTTTAATATCGAATTTCAACTAGTCATTATCGATATATAGAAAAG  
 CAATGACTTGTGTATATTAATCTTGTATCTTGCAACCTTGTATAATCATTTATTAGTCTCAGG  
 AGGG-TTTTTTGTGATGTGGGGGGATTTTCTACGGATGCAATCATGTCATCTT-AAAAAAA  
 GACG--TTCATTTCTTCCTTTCTAATCTGTGTGCCTTTTATTTTCTTTCCCTTGTCTTATTGCATTC  
 GCTAGGACTTTCAGTACAATGTTAAAAATCAGTGGTATAAATGTAAATAATTACTATTTATTGT  
 GAAAGAAAAATATCTTGGGCCCCCAACATCACTAAGCTAAAGGGAAAAGTCAAGCTGGGA  
 ACTGCTCAGGGCAAACCTGCCTCCCATTCTATTCAAAGTCATCCCTCTGCTCACTGAGATAA  
 ATGCATATCTGATTGCCTCCTTTGGAGAGGCTCATCAGAAATGCAGAAGAATGCAACCATTT  
 GTCTCTCACCTGCTTGTGACCTGGAAG-----CTCCCTCCCCGCTTCAAGT  
 TGTCTGACTTTGCATAGATTGTGGACCAAACCAATGTTTCATGTTACACATGTTGATTGATGT  
 CTCCTCTCTCCCTAAAATACGTAAAACCAAGCTGTGTTCTGACTGTCAGGCCTCTGAGCCCA  
 AGCTGAGCCATCATATCCCCTGTGACCTGCACATATACATCCAGATGGCCTGAAGTAACTGA  
 AG-GATTACAAAAGAAGTGAAAATGGCCTGTTCTGCTTAAC--TGATGACATTACCTTATG-  
 --AAATTCCTTCTCCTGGCTCATCCTGGCTCAAAAGCTCCCCACTGAGCACCTTATGACTCC  
 CACCCCTGCCAGCCAGAAAACAACCCCTTTGACTGTAATTTTCCACCACCCACCCAAATC  
 TTATAAACAGCCCCA-CCCTATCTCCCTTCGCTGACTCTCTTTTAGGATCCAGCCAGCCTGC  
 ACCCAGGTGAAATAAACAGCCTTGTTGCTCACACAAAGCCTGTCTGGTGGTCTCTTCACAG  
 AC-----

>Macaca\_mulatta-HERVHF\_3LTR+flanking(-)

-----ATA  
 TGTGGCTTGTCTTTTCATCCCTTA----ACAGTACCTCTCACAACCAGATGTGATGAATTTTAA  
 TGAAGCCAACTTACCAATTTTTTCT-----TTCATGGATCATGCTTTTGGTGTGGTATCTAA  
 AAAGTCATTGCCAAACCTTAGGCTTTCTCTTATGTTATCCTTAAAAGTTAATAGGTGTGTG  
 GTTTACACTTAGGTTTATGATCCCGTTTGTACTTA-TTTTTTGTGAAGCGTGTAAGTCTGTGTC  
 TATATGCATTTGTTGGCATGTGTATCTGGTCATCACAGCACTGTTTGTGAAAAGACTATATT  
 TCTCCATTAGGCTGCCTTTGCTCTTTTGTCAAAGATCAGTCGATTATATTTGTAGAGTCTATTT  
 CTGGGCTCTCTGATCTGGAGGAAAAAGATCTGTGGTTGCCAGGGATTGGAGGGACAAAA  
 GGCATGATCTTGGCTCACTGCAACCTCCACCT-CCCGGGTTCAAGGGATTCTCCTGCCTCAG  
 CCTCCTGAGTAGCTAGGATTTAGGTGTGTACCACCATGCCCTGATAA-TTTTTGTATTTGT  
 CTATTATTTTCTAATACCACACTGTCTGTTACTGCAGCTTTGTAGCAAGTCTTGAAGTCCTC  
 TAAGTTTTTCTCCTAGATGTTATATTAATACTATTCTGAGCCTTGCCTTTCAATCTACGTTTGAGA  
 ATGTGATTGTCAATATTCACAAAATAACTTGCTGGGATTTTGATTGGGATTGTCCCTAATCTG  
 TGGATCAAATTGGGAAGAACTGATAGCAATATCGTGTCTTTCTATCCATAAACATGGAATATC  
 TTTCCATTATTTAGATCTTTTGTTTATTTTCATTAGAGTTTTGTAGTTCTCCTCACATAGATTTT  
 GAACATGTGTTGTAGATTTGTACCTAAGTATTTTCATTTTTCTTGGTGCTAATATAAATAGTAT  
 TATCTTTTAAATATCGAATTTCAACTAGTCATTATCGATATATAGAAAAGCAATGACTTGTGTA  
 TATTAGTCTTGTATCTTGCAACCTTGTATAATCATTTATTAGTCTCAGGAGGG-TTTTTGTG  
 ATGTGGGGGGATTTTCTACGGATACAATCATGTCATCTT-AAAAAAAAGACG--TTCATTTCTT  
 CCTTTCTAATCTGTGTGCCTTTTATTTTCTTTCCCTTGTCTTATTGCATTTGCTAGGACTTTCAG  
 TACAATGTTAAAAATCAGTGGTATAAATGTAAATAATTACTATTTATTGTGAAAGAAAAATAT  
 CTTGGGCCCCCAACATCACTAAGCTAAAGGGAAAAGTCAAGCTGGGAAGTCTTAGGGTA

AACCTGCCTCCCATTTCTATTCAAAGTCATCCCTCTGCTCACTGAGATAAATGCATATCTGATT  
GCCTCCTTTGGAGAGGCTCATCAGAAATGCAGAAGAATGCAACCATTTGTCTCTCACCTGC  
TTGTGACCTGGAAGCTCCCT-CCCCCTTCAAGTTGTGACCTGGAAGCCTCCTCCCCCTTCA  
AGTTGTCCTGACTTTGCATAGATTGTGGACCAAACCAATGTTTCATGTTACACATGTTGATTGA  
TGTCTCCTCTCTCCCTAAAATATGTAAAACCAAGCTGTGTTCTGACTGTCAGGCCTCTGAGC  
CCAAGCTAAGCCATCATATCCCCGTGACCTGCACATATACATCCAGATGGCCTGAAGTAAC  
TGAAG-GATTACAAAAGAAGTGAAAATGGCCTGTTTCCTGCCTTAAC--TCATGACATTACCTT  
ATG---AAATTCCTTCTCCTGGCAAACCTTGGCTCAAAAAGCTCCCCCACTGAGCACCTTGTGA  
CCCCACCCCTGCCAGCCAGAAAACAACCCCTTTGACTGTAATTTTCCACCACCCACCCA  
AATCTTATAAAACAGCCCCA-CCCAATCTCCCTTCACTGACTCTCTTTTCGGATCCAGCCCCG  
CTGCACCCAGGTGAAATAAACAGCCTTGTTGCTCACACAAAGCCTGTTTGGTGGTCTCTTC  
ACACAGAC-----

>Macaca\_silenus-HERVHF\_5LTR+flanking(+)

-----ATA  
TGTTGGCTTGTCTTTTCATCCCTTA----ACAGTACCTCTCACAACCAGATGTGATGAATTTTAA  
TGAAGCCAAACTTACCAATTTTTTCT-----TTCATGGATCATGCTTTTGGTGTGGTATCTAA  
AAAGTCATTGCCAAACCCCTTAGGCTTTCTCTTATGTTATCCTTAAAAGTTAATAGGTGTGTG  
GTTTACACTTAGGTTTATGATCCCGTTTTGACTTA-TTTTTTGTGAAGCGTGTAAGTCTGTGTC  
TATATGCATTTGTTGGCATGTGTATCTGGTCATCACAGCACTGTTTGTGAAAAGACTATATT  
TCTCCATTAGGCTGCCTTTGCTCTTTTGTCAAAGATCAGTCGATTATATTTGTAGAGTCTATTT  
CTGGGCTCTCTGATCTGGAGGAAAAAGATCTGTGGTTGCCAGGGATTGGAGGGACAAAA  
GGCATGATCTTGGCTCACTGCAACCTCCACCT-CCCGGGTTCAAGGGATTCTCCTGCCTCAG  
CCTCCTGAGTAGCTAGGATTTAGGTGTGTACCACCATGCCCTGATAA-TTTTTGTATTTTGT  
CTATTATTTTTCTAATACCACACTGTCTGTTACTGCAGCTTTGTAGCAAGTCTTGAAGTCCTC  
TAAGTTTTTCTCCTAGATGTTATATTAATACTATTCTGAGCCTTGCCTTTCAATCTACGTTTGAGA  
ATGTGATTGTCAATATTCACAAAATAACTTGCTGGGATTTTGATTGGGATTGTCCCTAATCTG  
TGGATCAAATTGGGAAGAACTGATAGCAATATTGTGTCTTTCTATCCATAAACATGGACTATC  
TTTCCATTTATTTAGATCTTTTGTATTATTCATTAGAGTTTTGTAGTTCTCCTCACATAGATTTT  
GAACATGTGTTGTTAGATTTGTACCTAAGTATTTCATTTTCTTGGTGCTAATATAAATAGTAT  
TATCTTTTCAATATCGAATTTCAACTAGTCATTATCGATATATAGAAAAGCAATGACTTGCGTA  
TATTAATCTTGTATCTTGCAACCTTGTTATAATCATTATTAGTCTCAGGAGGG-TTTTTTGTG  
ATGTGGGGGGGACTTTCTACGGATACAATCATGTCATCTT-AAAAAAAAGACG--TTCATTTCTT  
CCTTTCTAATCTGTGTGCCTTTTATTTTCTTTCCTTGTCTTATTGCATTTGCTAGGACTTTAG  
TACAATGTTAAAAATCAGTGGTATAAATGTAAATAATTACTATTTATTGTGAAAGAAAAATAT  
CTTGGGCCCCAACATCACTAAGCTAAAGGGAAAAGTCAAGCTGGGAAGTGCCTTAGGGTA  
AACCTGCCTCCCATTTCTATTCAAAGTCATCCCTCTGCTCACTGAGATAAATGCATATCTGATT  
GCCTCCTTTGGAGAGGCTCATCAGAAATGCAGAAGAATGCAACCATTTGTCTCTCACCTGC  
TTGTGACCTGGAAGCTCCCT-CCCCCTTCAAGTTGTGACCTGGAAGCCTCCTCCCCCTTCA  
AGTTGTCCTGACTTTGCATAGATTGTGGACCAAACCAATGTTTCATGTTACACATGTTGATTGA  
TGTCTCCTCTCTCCCTAAAATATGTAAAACCAAGCTGTGTTCTGACTGTCAGGCCTCTGAGC  
CCAAGCTAAGCCATCATATCCCCGTGACCTGCACATATACATCCAGATGGCCTGAAGTAAC  
TGAAG-GATTACAAAAGAAGTGAAAATGGCCTGTTTCCTGCCTTAAC--TGATGACATTACCTT  
ATG---AAATTCCTTCTCCTGGCTCATCCTGGCTCAAAAAGCTCCCCCACTGAGCACCTTGTGA

CCCCACCCCTGCCAGCCAGAAAACAACCCCTTTGACTGTAATTTTCCACCACCCACCCA  
AATCTTATAAACAGCCCCA-CCCTATCTCCCTTCACTGACTCTCTTTTCGGATCCAGCCCGC  
CTGCACCCAGGTGAAATAAACAGTCTTGTTGCTCACACAAAGCCTGTTTGGTGGTCTCTTC  
ACACAGACG-----

>Mandrillus\_leucophaeus-HERVHF\_5LTR+flanking(+)

-----GACACAAGTCCTTTATCACACGTGTGG  
TTTGAAAATCTTTTTCTTCCAATATGTGGCTTGTCTTTTCATCCCTTA----ACAGTACCTCTCA  
CAACCAGATGTGATGAATTTAATGAAGCCAAACTTACCAATTTTTTCT-----TTCATGGAT  
CATGCTTTTGGTGTCTGATCTAAAAAGTCATTGCCAAACCCTTAGGCTTTCTCTTATGTTATC  
CTTAAAAGTTAATAGGTGTGTGGTTTACACTTAGGTTTATGATCCCGTTTTGACTTA-TTTTT  
TGTGAAGCGTGTAAGTCTGTGTCTATATGCATTGTGTTGGCATGTGTATCTGGTCATCACAGCA  
CTGTTTGTGAAAAGACTATATTTCTCCATTAGGCTGCCTTCGCTCTTTTGTCAAAGATCAGT  
CGATTATATTTGTAGAGTCTATTTCTGGGCTCTCTGATCTGGAGGAAAAAGGTCTGTGATTGC  
CAGGGATTTGGAGGGACAAAAGGCATGATCTTGGCTCACTGCAACCTCCACCT-CCCGGGT  
TCAAGGGATTCTCCTGCCTCAGCCTCCTGAGTAGCTAGGATTTCAAGGTGCGTACCACCATGC  
CCTGATAA-TTTTTGTATTTTGTCTATTATTTTTCTAATACCACACTGTCTGTTACTGCAGCTTT  
GTAGCAAGTCTTGAAGTCCTCTAAGTTTTTCTCCTAGATGTTATATTAATACTATTCTGAGCCTT  
GCCTTTCAATCTACATTTGAGAATGTGATTGTCAATATTCACAAAATAACTTGCTGGGATTTT  
GATTGGGATTGTACCGAATCTGTGGATCAAATTGGGAAGAACTGATAGCAATATCGTGTTTT  
TCTATCCATAAACATGGAATATCTTTCCATTTATTTAGATCTTTTGTTTATTTTCATTAGAGTTTT  
GTAGTTCTCCTCACATA-----GTTAGATTTGTACCTAAGTATTTCATTTTTCTTGGTGC  
TAATATAAATAGTATTATCTTTTTAATATCGAATTTCAACTAGTCATTATCGATATATAGAAAAG  
CAATGACTTGTGTATATTAATCTTGTATCTTGCAACCTTGTATAATCATTTATTAGTCTCAGG  
AGGG-TTTTTGTGATGTGGGGGATTTTCTACGGATACAATCATGTCATCTT-AAAAAAA  
GACG--TTCATTTCTTCCTTTCTAATCTGTGTGCCTTTTATTTTCTTTCCTTGTCTTATTGCATTC  
GCTAGGACTTTCAGTACAATGTAAAAATCAGTGGTATAAATGTAAACAATTACTATTTATTG  
TGAAAGAAAAATATCTTGGGCCCCCAACATCACTAAGCTAAAGGGAAAAGTCAAGCTGGG  
AACTGCTTAGGGCAAACCTGCCTCCCATTTCTATTCAAAGTCATCCCTCTGCTCACTGAGATA  
AATGCATATCTGATTGCCTCCTTTGGAGAGGCTCATCAGAAATGCAGAAGAATGCAACCATT  
TGTCTCTCACCTGCTTGTGACCTGGAAG-----CCCCCTCCCCCTTCAAG  
TTTTCTGACTTTGCATAGATTGTGGACCAAACCAAGTGTTTCGTATTACACATGTTGATTGATG  
TCTCTCTCTCCCTAAAATATGTAAACCAAGCTGTGTTCTGACTGTCAGGCCTCTGAGCCC  
AAGCTAAGCCATCATATCCCCTGTGACCTGCACATATACATCCAGATGGCCTGAAGTAAGTG  
AAG-GATCACAAAAGAAGTGAAAATGGCCTGTTCCCTGCCTTAAT--TGATGACATTACCTTAC  
G---AAATTCCTTCTCCTGGCTCATCCTGGCTCAAAAGTTCCCCACTGAGCACCTTGTGACT  
CCCACCCCTGCCTGCCAGAAAACAACCCCTTTGACTGTAATTTCCCACTGCCACCCAAAT  
ATTATAAACAGCCCCA-CCCCATCTCCCTTCGCTGACTCTCTTTTCGGACTCAGCCTGCCTG  
CACCCAGGTGAAATAAACAGCCTTGTGCTCACACAAAGCCTGTTTGGTGGTCTCTTCACA  
CAGACG-----

>Pongo\_abelii-HERVHF\_3LTR+flanking(-)

TTAATATATCTTTTCATGGCTTAATAGCTCAATTCTTTTCATTGCTAAATAATATCCACTGTAT  
GCATGTACCATAGTTTATTAATCCATCTCTGCTTTGTATATCTTCTTTGATGAGGTGTCTATCC  
AGATCTCTTGACCATTTTAAATTGGGTGTTTTCTTATCGTTGAGTTTTAGTTTTTGTGTTTT

AGACACGAGTCCTTTATCAGACGTGTGGTTTGAACATCTTTTTCCCCCAGTATGCGGCTTGT  
CTTTTCATCCCTTA----ACAGTAACTCTCACAACCAGATGTGATGAATTTAATGAAGCCAAA  
CTTACCAATTTTTTCT-----TTCATGGATCATGCTTTTGGTGTGCATATCTAAAAAGTCATCAC  
CAAACACTTAGGCTTTTCTTATGGTATCCTTACAAGTTAATAGCTTTGTGGTTTACACTTA  
GGTTTATGATCCCGTTTGACTIONA-TTTTTTGTGAAGGGTGTAAAGTCTGTGTCTATATGCATTT  
GTTGGCATGTATGTCTGGTCATCAGAGCACCCTTGTGAAAAGACTATCTTTCTCCATTAG  
ATTGCCTTTGCTCTTTTGTCAAAGATCAGTCGATTATATTGTAGAGCCTATTCCTGGGCTCT  
CTGATCTG-----TTCCATTGC  
TCTG-----TTTGTCTGTTATTTTGCCAATACCACACT  
GTCTGTTACTGCAGCTTTGTAGCAAGCCTTCAGGTCCTCTAAGTTTTTCTCCTGGATGTTATA  
TTAACTATTCTGAGCCTTGCCCTTCAGTATAAATTTAAGAATGTGATTGTCAATATTCACAAA  
GTAACCTGCTGGGATTTTTATTGGGATTGCACTGAATCTATAGATCAAATTGGGAAGAACTG  
ATAACAATATCATGCCCTTCTATCCATAAACATGGAATATCTTCCATTATTATAGATCTTTTAT  
TTATTTTATTAGAGTTTTGTAGTTCTTCTCACATAGATTTTGAACATGTGTTGTTAGATTTGTA  
CCTAAGTATTTTCATTTTTCTTAGTGCTAAT-----TATTACCTTTTTAATATTAAATTTCAACTAT  
TCATTATTGATATATAGAAAAGCAATGACTTGTATATATTAATCTTGCATCTTGCAACCTTGTTA  
TAATCATTTATTAGTCTCAGGAGGG-TTTTTTGTGATGTGGGGGGATTGTCTACGGACATGA  
TCACGTCATCTT-AAAAAAAAGACACTTTTCAATTTCTTCCCTTTCTAATCTGTGTGCCCTTTTATTT  
TCTTTCCTTGTCTTATTGCATTAGCTAGGACTTTCAGTACAATGTTAAAAATCAGTCGTATAA  
ATGTAAATAATTATTATTATTGTGAAAGAAAAATATCTTGGGCCCCAAAATCACTAAGCTA  
AAGGGAAAAGTCAAACCTGGGAACCTGCTTAGGGCAAACCTGCCTCCCATTCTATTCAAAGTC  
ATCCCTCTGCTCACTGAGATAAATGCATATCTGATCGCCTGCTTCAGAGAGGCTCATCAGAA  
ACTCAAAAGAATGCAACTGTTTGTCTCTCACCTACTTGTGACCTGGAAG-----  
-----CACCTCCCTACTTAGAGTTGTCCCGCTTTTGTCTTAGATTCTGGACGAAACCAATGTTC  
ATTTTACATACGTTGATTGATGTCTCATGTCTCCCTAAAATGTATAAAACCAAGCTGTGTTCT  
GACTGTGAGGCCTCTGAGCACAAGCCAAGCCATCGTATCCCATGTAACCTGCACGTACACA  
TCCAGATGTCCTAAAGTAACTGAAG-AATCACAAAAGAAGTGAAAACGGCCTGTTCCCTGCC  
TTAAC--TGATGATATTACCTTGTG---AAATTCCTTCTCCTGGCTCATCCTGGCTCAAAAGCTC  
CCCAACTGAGCACCTTGTGACCCCCACCCCTGCCAGCCAGAAAACAACCCCTTTGACTGT  
AATTTTCCACTACCTACCCAAATCCTATAAAACGGCCCCACCCCTATCTCCCTTCCCTGACTC  
TCTTTTCGGACTCAGCCCGCCTGCACCCAGGT-----  
-----

>Pygathrix\_nemaeus-HERVHF\_5LTR+flanking(+)

-----GAGCGCCGGCGTGACTTC---  
-----CCTGGGCCCCCACACCTGAGGACCAGAGAACCTCACCTGAGAGTGTGTGT  
ATATTTGTAATAA----AAGGCTGCCGCTTTCTTATGTATTTTGGCCTCATGTTTAATTACTTAGC  
TCTCCTAAATTAAGTTACATTAAATTAATAAGA----CACTTATGTTATCCTTAAAAGTTTAAC  
AGTTTTGTGGTTCACACTTAGGTTTATGATCCCGTTTGACTIONA-TTTTTTGTGAAGCGTGTA  
AGTCTGTGTCTATATGCATTTGTTGGCATGTGTATCTGGTCATCACAGCACCGTTTGTGAAA  
AGACTATCTTTCTCCGTTAGGTTGCCTTTGCTCTTTTGTCAAAGATCAGTCGATTATATTGTA  
GAGTCTATTTCTGGGCTCTCTGATCTGGAGGAAAAAGGTTTGTGGTTGCCAGGGATTGGA  
GGGACGAAAGGCATGATCTTCGCTCACTGCAACCTCCACCT-CCCAGGTTCAACGGATTCTC  
CTGCCTCAGCCTCATGAGTAGCTAGGATTTAGGTGCGTACCACCATGCCCTGCTAA-TTTTT

GTATTTTGTCTATTATTTTCTAATACCACACTGTCTGTTACTGCAGCTTTGTAGCAAGTCTTG  
AAGTCCTCTAAGTTTTTCTCCTGGATGTTATTAATACTGTTCTGAGCCTTGCCTTTCAATCTAT  
GTTTGAGAATATGATTGTCAATATTCACAAAATAACTTGCTGGGATTTTGATTGGGATTGCAC  
CGAATCTGTGGATCAAATTGGGAAGAAGCTGATAACAATATCGTGTCTTTCTATCCATAAACAT  
GGAATATCTTTCCATTTATTTAGATCTTTTTTTTATTTTCATTAGAGTTTTGTAGTTCTCCTCACA  
CAGATTTTGAACATATGTTGTTAGATTTGTACCTAAGTATTTCATTTTTCTTGGTGCTAATATA  
AATAGTATTATCTTTTTTAATATCAAATTTCAACTATTTCATTATCGATATATAGAAAAGCAATGAC  
TTGTATATATTAATCTTGCATCTTGCAACTTTGTTATAATCATTATTTAGTCTCAGGAGGG-TTT  
TTTGTGATGTGGAGGGATTTTCTATGGACACAATCATGTCATCTTAAAAAAAAGGCG--TT  
CATTTCTTCCTTTCTAATCTGTGTGCCTTTTATTTTCTTTCCTTATCTTATTGCATTAGCTAGGA  
CTTTCAGTACAATGTTAAACATCAGTGGTATAAATGTAAATAATCACTATTTATTGTGACAGA  
AAAATATCTCGGGCCCCAACATCACTAAGCTAAAGGGAAAAGTCAAGCTGGGAAGTGCCTT  
AGGGTAAACCTGCCTCCCATTCTATTCAACGTCATCCCTCTGCTCACTGAGATAAATGCATAT  
CTGATTGCCTCCCTTGGAGAGGCTCATCAGAAATGCAGAAGAATGCAACCATTTGTCTCTC  
ACCTACTTGTGACCTGGAAG-----CCCCTCCCTGCTTCAAGTTGTCCTG  
ACATTGCTTAGATTGTGGACCAAACCAATGTTTCATGTTACACATGTTGATTGATGTCTCCTGT  
CTCCCTAAAATATTTAAAACCAAGCTGTGTTCTGACTGTCAGGCCTCTGAGCCCAAGCTAAG  
CCATCATATCCCCTGTGACCTGCACATATACATCCAGATGGCCTGAAGTAACTGAAG-GATCA  
CAAAAGAAGTGAAAATGGCTTGTTCTGCCTTAACAGCAGTGACATTGCACCTAGCGAGAA  
TTCCTTCTCCTGGCTCATCCTGCCTCAAAGCTCTCCCACTGAGCACCTTGTGACCCCCACC  
CCTGCCAGCCAGAAAACAACCCCTCTGACTGTAATTTTCCACTACCTACCCAAATATTATA  
ATACAGCCCCACCCCTATCTCCCTT-GCTGACTCTCTTTTCGGATTTCAGCCCACCTGCACCCA  
GGTGAAATAAACAGCCTTGTTGCTCACACAAAGCCTGTTTGGTGGTCTCTTCACACAGACG  
CTAGTGAAA-----

>Rhinopithecus\_roxellana-HERVHF\_3LTR+flanking(-)

-----ACCAAGAGCACCGGCGTGACTT  
C-----CCTGGGCCCCACACCTGAGGACCAGAGAACCTCGCCTGAGAGTGTG  
TGCATATTTGTAATAA---AAGACTGCTGCTTTCTTATGTATTTGGCCTCATGTTTAATTACTT  
AGCTCTCCTAAATTAAGTTACATTAAATTAATAAGA---CACTTATGTTATCCTTAAAGTTT  
AATAGTTTTGTGGTTCACACTTAGGTTTATGATCCCGTTTTGACTTA-TTTTTGTGAAGCGTG  
TAAGTCTGTGTCTATATGCATTTGTTGGCATGTGTATCTGGTCATCACAGCACCGTTTGTGG  
AAAGACTATCTTTCTCCATTAGGTTGCCTTTGCTCTTTTGTCAAAGATCAGTCGATTATATT  
GTAGAGTCTAGTTCTGGGCTCTCTGATCTGGAGGAAAAAGGTTTGTGGTTGCCAGGGATTT  
GGAGGGACGAAAGGCATGATCTTCGCTCACTGCAACCTCCACCT-CCCAGGTTCAAGGGAT  
TCTCCTGCCTCAGCCTCATGAGTAGCTAGGATTTTCAGGTGCGTACCACCATGCCCTGCTAA-T  
TTTTGTATTTTGTCTTTTATTTTCTAATACCACACTGTCTGTTACTGCAGCTTTGTAGCAAGT  
CTTGAAGTCTCTAAGTTTTTCTCCTGGATGTTATTAATACTATTCTGAGCCTTGCCTTTCAAT  
CTATGTTTGAGAATGTGATTGTCAATATTCACAAAATAACTTGCTGGGATTTTGATTGGGATT  
GCACCGAATCTGTGGATCAAATTGGGAAGAAGCTGATAACAATATCGTGTCTTTCTATCCATA  
AACATGGAATATCTTTCCATTTATTTAGATCTTTTATTTATTTTCATTAGAGTTTTGTAGTTCTCC  
TCACATAGATTTTGAACATAGGTTGTTAGATTTGTACCTAAGTATTTCATTTTCTTGGTGCTA  
ATATAAATAGTATTATCTTTTTAATATCAAATTTCAACTATTTCATTATCGATATATAGAAAAGCA  
ATGACTTGTATATATTAATCTTGCATCTTGCAACTTTGTTATAATCATTATTTAGTCTCAGGAG

GGTTTTTTTGTGATGTGGAGGGATTTTCTACGGACACAATCATGTCATCTTAAAAAAAAG  
GCG--TTCATTTCTCCCTTTCTAATCTGTGTGCCTTTTATTTTCGTTCCCTGTCTTATTGCATTAG  
CTAGGACTTTTCAGTACAATGTAAACATCAGTGGTATAAATGTAAATAATCACTATTTATTGT  
GACAGAAAAATATCTCGGGCCCCCAACATCACTAAGCTAAAGGGAAAAGTCAAGCTGGGA  
ACTGCTTAGGGTAAACCTGCCTCCCATTTCTATTCAAAGTCATCTCTCTGCTCACTGAGATAAA  
TGCATATCTGATTGCCTCCTTTGGAGAGGGCTCATCAGAAATGCAGAAGAATGCAACCATTG  
TCTCTCACCTACTTGTGACCTGGAAG-----CCCCTCCCTGCTTCAAGTT  
GTCCTGACATTGCTTAGACTGTGGACCAAACCAATGTTTCATGTTACACATGTTGATTGATGT  
CTCCTGTCTCCCTAAAATATTTAAAACCAAGCTGTGTTCTGACTGTCAGGCCTCTGAGCCCA  
AGCTAAGCCATCATATCCCCTGTGACCTGCACATATACATCCAGATGGCCTGAAGTAACTGA  
AG-AATCACAAAAGAAGTAAAAATGGCCTGTTTCTGCCTTAAC--TGATGACATTACCTTGTG  
---AAATTCCTTCTCCTGGCTCATCCTGCCTCAAAGCTCTCCCACTGAGCACCTTGTGACCC  
CCACCCCTGCCAGCCAGAAAAACAACCCCTCTGACTGTAATTTCCACTACCTACCCAAATA  
TTATAATACAGCCCCACCCCTATCTCCCTT-GCTGACTCTCTTTTCGGATTGAGCCACCTGCA  
CCCAGGTGAAATAAACAACCTTGTGCTCACACAAAGCCTGTTTGGTGGTCTCTTCACACA  
GACGCTAGTGAA-----

>Rhinopithecus\_strykeri-HERVH\_5LTR+flanking(+)

-----ACCGAGAGCACCGGCGTGACTT  
C-----CCTGGGCCCCCACACCTGAGGACCAGAGAACCTCGCCTGAGAGTGTG  
TGCATATTTGTAATAA---AAGGCTGCTGCTTTCTTATGTATTTTGGCCTCATGTTTAATTACTT  
AGCTCTCCTAAATTAAGTTACATTAAATTAATTAAGA---CACTTATGTTATCCTTAAAAGTTT  
AATAGTTTTGTGGTTCACACTTAGGTTTATGATCCCGTTTGGACTTA-TTTTTGTGAAGCGTG  
TAAGTCTGTGTCTATATGCATTTGTTGGCATGTGTATCTGGTCATCACAGCACCGTTTGTGG  
AAAGACTATCTTTCTCCGTTAGGTTGCCTTTGCTCTTTTGTCAAAGATCAGTCGATTATATTT  
GTAGAGTCTAGTTCTGGGCTCTCTGATCTGGAGGAAAAAGGTTTGTGGTTGCCAGGGATT  
GGAGGGACGAAAGGCATGATCTTCGCTCACTGCAACCTCCACCT-CCCAGGTTCAAGGGAT  
TCTCCTGCCTCAGCCTCATGAGTAGCTAGGATTTAGGTGCGTACCACCATGCCCTGCTAA-T  
TTTTGTATTTGTCTTTTATTTTCTAATACCACACTGTCTGTACTGCAGCTTTGTAGCAAGT  
CTTGAAGTCTCTAAGTTTTTCTCCTGGATGTTATATTAATCTGAGCCTTGCCCTTCAAT  
CTATGTTTGAGAATGTGATTGTCAATATCACAAAATAACTTGCTGGGATTTTGATTGGGATT  
GCACCGAATCTGTGGATCAAATTGGGAAGAAGTATAACAATATCGTGTCTTTCTATCCATA  
AACATGGAATATCTTTCCATTTATTTAGATCTTTTATTTATTTTATTAGAGTTTTGTAGTTCTCC  
TCACATAGATTTTGAACATAGGTTGTTAGATTTGTACCTAAGTATTTTCAATTTCTTGGTGCTA  
ATATAAATAGTATTATCTTTTAATATCAAATTTCAACTATTCAATTATCGATATATAGAAAAGCA  
ATGACTTGTATATATTAATCTTGCATCTTGCAACTTTGTTATAATCATTTATTAGTCTCAGGAG  
GG-TTTTTTGTGATGTGGAGGGATTTTCTACGGACACAATCATGTCATCTTAAAAAAAAG  
GCG--TTCATTTCTCCCTTTCTAATCTGTGTGCCTTTTATTTTCATTCCCTGTCTTATTGCATTAG  
CTAGGACTTTTCAGTACAATGTAAACATCAGTGGTATAAATGTAAATAATCACTATTTATTGT  
GACAGAAAAATATCTCGGGCCCCCAACATCACTAAGCTAAAGGGAAAAGTCAAGCTGGGA  
ACTGCTTAGGGTAAACCTACCTCCCATTTCTATTCAAAGTCATCCCTCTGCTCACTGAGATAAA  
TGCATATCTGATTGCCTCCTTTGGAGAGGGCTCATCAGAAATGCAGAAGAATGCAACCATTG  
TCTCTCACCTACTTGTGACCTGGAAG-----CCCCTCCCTGCTTCAAGTT  
GTCCTGACATTGCTTAGACTGTGGACCAAACCAATGTTTCATGTTACACATGTTGATTGATGT



CTCCTGTCTCCCTAAAATATTTAAAACCAAGCTGTGTTCTGACTGTCAGGCCTCTGAGCCCA  
AGCTAAGCCATCATATCCCCTGTGACCTGCACATATACATCCAGATGGCCTGAAGTAACTGA  
AG-AATCACAAAAGAAGTGAAAATGGCTTGTTCCTGCCTTAAC--TGATGACATTACCTTGTG  
---AAATTCCTTCTCCTGGCTCATCCTGCCTCAAAAGCTCTCCCACTGAGCACCTTGTGACCC  
CCACCCCTGCCAGCCAGAAAACAACCCCTCTGACTGTAATTTTCCACTACCTACCCAAATA  
TTATAATACAGCCCCACCCCTATCTCCCTT-GCTGACTCTCTTTTCGGATTTCAGCCCACCTGCA  
CCCAGGTGAAATAAACAACCTTGTGCTCACACAAAGCCTGTTTGGTGGTCTCTTCACACA  
GACGCTAGTGAAA-----

>Theropithecus\_gelada-HERVHF\_3LTR+flanking(-)

-----ATA  
TGTGGCTTGTCTTTTCATCCCTTA-----ACAGTACCTCTCACAACCAGATGTGATGAATTTTAA  
TGAAGCCAAACTTACCAATTTTTTCT-----TTCATGGATCATGCTTTTGGTGTCTATCTAA  
AAAGTCATTGCCAAACCCTTAGGCTTTCTCTTATGTTATCCTTAAAAGTTAATAGGTGTGTG  
GTTTACACTTAGGTTTATGATCCCGTTTGTACTTA-TTTTTTGTGAAGCGTGTAAGTCTGTGTC  
TATATGCATTTGTTGGCATGTGTATCTGGTCATCACAGCACTGTTTGTGAAAAGACTATATT  
TCTCCATTAGGCTGCCTTTGCTCTTTTGTCAAAGATCAGTCGATTATATTGTAGAGTCTATTT  
CTGGGCTCTCTGATCTGGAGGAAAAAGGTCTGTGATTGCCAGGGATTGGAGGGACAAAA  
GGCATGATCTTGGCTCACTGCAACCTCCACCT-CCCGGGTTCAAGGGATTCTCCTGCCTCAG  
CCTCCTGAGTAGCTAGGATTTCAGGTGCGTACCACCATGCCCTGATAA-TTTTTGTATTTGT  
CTATTATTTTTCTAATACCACACTGTCTGTTACTGCAGCTTTGTAGCAAGTCTTGAAGTCCTC  
TAAGTTTTTCTCCTAGATGTTATATTAATACTATTCTGAGCCTTGCCTTTCAATCTACATTTGAGA  
ATGTGATTGTCACTATTCACAAAATAACTTGCTGGGATTTTGATTGGGATTGTACCGAATCTG  
TGGATCAAATTGGGAAGAACTGATAGCAATATCGTGTCTTTCTATCCATAAACATGGAATATC  
TTTCCATTATTTAGATCTTTTGTATTATTCATTAGAGTTTTGTAGTTCTCCTCACATAGATTTT  
GAACATGTGTTGTTAGATTTGTACCTAAGTATTTCAATTTTCTTGGTGCTAATATAAATAGTAT  
TATCTTTTAAATATCGAATTTCAACTAGTCATTATCGATATATAGAAAAGCAATGACTTGTGTA  
TATTAATCTTGATCTTGCAACCTTGTTATAATCATTTATTAGTCTCAGGAGGG-TTTTTGTTG  
ATGTGGGGGGATTTTCTACGGATGCAATCATGTCATCTT-AAAAAAAAGACG--TTCATTTCTT  
CCTTTCTAATCTGTGTGCCTTTTATTTTCTTTCTTGTCTTATTGCATTTCGCTAGGACTTTTCTCAG  
TACAATGTTAAAAATCAGTGGTATAAATGTAAATAATTACTATTTATTGTGAAAGAAAAATAT  
CTTGGGCCCCCAACATCACTAAGCTAAAGGGAAAAGTCAAGCTGGGAAGTCTTAGGGCA  
AACCTGCCTCCCATTTCTATTCAAAGTCATCCCTCTGCTCACTGAGATAAATGCATATCTGATT  
GCCTCCTTTGGAGAGGCTCATCAGAAATGCAGAAGAATGCAACCATTTGTCTCTCACCTGC  
TTGTGACCTGGAAGCTCCCTCCCCCTTCAAGTTGTGACCTGGAAGCCTCCTCCCCCTTC  
AAGTTGTCTGACTTTGCATAGATTGTGGACCAAACCAATGTTTCATGTTACACATGTTGATT  
GATGTCTCCTCTCTCCCTAAAATACATAAAACCAAGCTGTGTTCTGACTGTCAGGCCTCTGA  
GCCCAAGCTAAGCCATCATATCCCCTGTGACCTGCACATATACATCCAGATGGCCTGAAGTA  
ACTGAAG-GATTACAAAAGAAGTGAAAATGGCCTGTTTCCTGCCTTAAC--TGATGACATTACC  
TTATG---AAATTCCTTCTCCTGGCTCATCCTGGCTCAAAAGCTCCCCCACTGAGCACCTTGTG  
ACTCCCACCCCTGCCAGCCAGAAAACAACCCCTTTGACTGTAATTTTCCACCACCCACCC  
AAATCTTATAAAACAGCCCCA-CCCTATCTCCCTTCGCTGACTCTCTTTTCGGATCCAGCCCG  
CCTGCACCCAGGTGAAATAAACAGCCTTGTGCTCACACAAAGCCTGTCTGGTGGTCTCTT  
CACACAGAC-----



**Supplementary data S5 The alignments of the 3LTR and flanking sequences of a widely vertical transmitted HERV-H in 17 species**

>Cercopithecus\_atrys-HERVHF\_5LTR+flanking(-)

-----CTAAGCCATCATATCCCCTGTGACCTGCAC-TATACATCCAGATGGCCTG  
AAGTAACTGAAGAATCACAAAAGAAGTGAAAGTGGCCTGTTCTGCCTTAACTGATGACAT  
TAATTTGTGAAATTCCTTCTCCTGGCTCATCCTGGCTCAAAAGTTCCCCCACTGAGCACCTT  
GTGA-CCCCACCCCTGCCAGCCAAAA-ATAACCCCTTTGACTGT-AATTTTCCACTACCTA  
CCCAAATCCTATAAAACGACCCACCCCTATCTCCCTTCACTGACTCTCTTTTCGGACTCAG  
CCCACCTGCACCCAGGTGAAATAAACAGTCTTGTGCTCACACAAAGCCTGTTTGGTGGTC  
TCTTCACATGGACGTGCGTGAAACTGACCACTGTGGGCACATGTCATCAGGACCTTCTGAG  
GCTGGGTACAGCCGTGTGCTCTCAAACCTGGCAAATAAACCTTTCTAAATTAATAAGAC  
TTGTCTCAGATTTTCGGGGTTCATATTATCAATTAACAAAACAAAATTTAAATT-TAAAAAAG  
AGGAAAGCAGTGTTGAGGGGGGCATCCTGACCTTGCTCCTGATCTTAGCAGGGAAGCTTCA  
AGTTTCTCACCATTAAAGTGTGACCACTGTTGGCTTTTTGTC-GAGTTTGGACAGCTGCAGGC  
TCCTTATCAAGTTCCCCTCTAGTCTCATTTGCTGAGAGCGTTTATCATGAATGGGTGTTGGA  
TTTTGTAGATGATTTTCTGAATCTGC---TATGATCATGTGACTTTTCTTCTTAGCCTGTTG  
AGGTGATGGATTACATGACTAGATTTTCAAATGCTGAACCAGTTTGTGTACCTGAGATAAA  
TCCCACTCTGTT-----

-----GTGGTATATAATTC  
TTTTTATGCATTGTTTGGATTGACTTGCTAATTTTCGTTGAAGATTTTGCATCTATGTTTAT  
GAAAGCTATTGGCTTATGGCTTTCCTTCTTGTGCTTTGTCTGGTTTTGTTTTAGGGTAAT  
GCTGGCTTTATAGAATGCGTTAGAAAACATTCCTTTTGCTTCTATTATCTGGAAGACATCATA  
GAAAATTACTATCATTCTCCTTAAATGTTTGGCAGAATTCATCAGCAAACCCGTTCCAGAC  
CTGGTGCTTCCTATTTGGAAGGTAATTATTTATTGATTCAATTCCTTTAATGCATACATACCTAT  
TCATATTATCTATTCTTCTTGTGTAAGTTTTGGTAGATTGCATCTTTAAGAAATTGATCCATT  
CATCTAGGTTATCATATTTCTGGGCATAGAGTTGTTATGGTAATAATATTCTATTATTATCCTTT  
ACAATATTCCTCTAGGATCAGTAGCAGTGG-CACCTATTTTATTCTAATGCTAATAAATTGTG  
TCTCATTCTTTCTTTGTTAACTTGGCCAGAGGTTATCAATTTCAATCC-----TTTATTTTTTT  
CAAAGAACCAGCTTTTGGTT---TTGATTTTCTCTAGTAGGTTCTGATTTCAAGTTTCACTGA  
TGTCTGCTTTAGTTAATTTTCTGTCTACTATGTTTAAATTAGTTCTTCTTTCTAGTTTCTT  
GAGGTGGAACTTAGATGATTTGTTTCTGATCTTCTTCTTTCTAAATGCCTTCTTTCAAT  
GCCATAAACTTTCCTCTAAGCACTGCTTTTGTGTCATCTCACAAATTTGATAAGTTGTATTT  
TCATTTTCATTTATTTCAAATATTGCTTAATTTCTCTGGAGACCTTTTCCTTTGACTGATGTG  
TTATTTAGAAGTGTTTGTGTTAATCTCCAGGATTTTTTAAATTTCCAATTGTCTTTCTGTTATT  
GATTTCTAGTTTTATTGTGTTTCAGAAAGCATATTTTATTTTTTAGTTCTTTTAAACTTGTGAG  
GTGTGTCAGGGCTTAGAATCTGGTCTGTCTTGGTGAATGTTCCACATAAGCATGAGAAGAAT  
GTATTTTGCTGTTGCTTCACGAAATATCCATAGCTATCCAGTAAAT-----

>Cercopithecus\_mitis-HERVHF\_5LTR+flanking(-)

--GAATGTCAGGCCTCTGAGCCCAAGCTAAGCCATCATATCCCCTGTGACCTGCGC-TATACAT

CCAGATGGCCTGAAGTAACTGAAGAATCACAAAAGAAGTGAAAGTGGCCTGTTCTGCCTT  
AACTGATGACATTACCTTGTGAAATTCCTTCTCCTGGCTCATCCTGGCTCAAAAGTCCCCC  
ACTGAGCACCTTGTGA-CCCCACCCCTGCCAGCCAAAA-ATAACCCCCTTTGACTGTGAAT  
TTTCCACTACCTACCCAAATCCTATAAAACGACCCACCCCTATCTCCCTTCACTGACTCTCT  
TTTCGGA CTCAGCCCACCTGCACCCAGGTGAAATAAACAGTCTTGTTGCTCACACAAAGCC  
TGTTTGGTGGTCTCTTCACATGGACGTGCGTGAAACTGACCACTGTGGGCACATGTCATCA  
GGACCTTCTGAGGCTGGGTACAGCCGTGTGTCCTCAAACCTGGCAAAATAAACTTTCTAA  
ATTA ACTAAGACTTGTCTCAGATTTTCGGGGTTCATGTTATCAATTA AAAACCAAATTTAAA  
TT-AAAAAAAAGAGGAAAGCAGTGTTGAGGGGGGCATCCTTACCTTGCTCCTGATCTTAGC  
AGGGAAGCTTCAAGTTTCTCACCATTAAAGTGTGACCACTGTTGGCTTTTTGTCAGAGTTTTG  
ACAGCTGCAGGCTCCTTATCAAGTTCCCCTCTAGTCTCATTGCTGAGAGCGTTTATCATG  
AATGGGTGTTGGATTTTGTAGATGATTTTCTGAATCTGC---TATGATCATGTGACTTTTCTT  
CTTTAGCCTGTTGAGGTGATGGATTACATGACTAGATTTTCAAATGCTGAACCAGTTTTGTGT  
ACCTGAGATAAATCCCACTCTGTT-----

-----G  
TGGTATATAATTCTTTTTATGCATTGTTGGATTTGACTTGCTAATTTTTCGTTGAAGATTTTG  
CATCTATGTTTATGAAAGCTATTGGCTTATGGCTTTCCTTCTTGTGTCTTTGTCTGGTTTTCT  
TTTTAGGGTAATGCTGGCTTTATAGAATGCATTAGAAAACATTCTTTTGCTTCTATTATCTGG  
AAGACATCATAGAAAATTACTATCGTTTCTTCTTAAATGTTTGGCAGAATTCATCAGCAAAC  
CTGTT CAGACCTGGTGCTTCCTATTGGAAGGTAATTATTTATTGATTCAATTCCTTTAATGCA  
TACATACCTATT CATATTATCTATTCTTTTTTGTGTAAGTTTGGTAGATTGCATCTTTAAGAAA  
TTGATCCATTT CATCTAGGTTATCATATTTCTGGGCATAGAATTGTTATGGTAATAATATTCTAT  
TATTATCCTTTACAATATTCTCTAGGATCAGTAGCAGTAG-CCCCATTTTGTCTTAATGCTA  
ACAATTTGTGTCTCATTTCTTTCTTTGTTAACTTGCCTAGAGGTTTATCAATTCATTCC-TTTT  
TTTTTTTTTTTTTAAAAGAACCAGCTTTTGGTT--TTGATTTTCTCTAGTAGGTTCCGATTTC  
AGTTTCACTGATGTCTGCTTTAGTTAATTTTTCTGTCTACTATGTTTTTAATTAGTTCTTCTTT  
TCTAGTTTCTTGAGGTGGAACTTAGATGATTTGTTTCTGATCTTCTTCTTTTCTAAAATGC  
CTTCTTTCAATGCCATAAACTTTCCTCTAAGCACTGCTTTTGTGTCATCTCACAAATTTGAT  
AAGTTGTATTTTCATTTTCATTTATTTCAAATATTGCTTAATTTCTCTGGAGACCTTTTCTTT  
GACTGATGTGTTATTTAGAAGTGTTTTGTTTAATCTCCAGGTATTTTTTAATTTCCAATTGTC  
TTTCTGTTATTGATTTCTAGTTTGTGTGTTT CAGAGAGCATATTTTATTTTTTAGTTCTTTTAA  
ACTGTTGAGGTGTGCCAGGACTTAGAATTTGGTCTGTCTTGGTGAATGTTCCACATAAGCA  
TGAGAAGAATGTATTTTGCTGTTGCT-----

>Cercopithecus\_mona-HERVHF\_5LTR+flanking(-)

--GAATGTCAGGCCTCTGAGCCCAAGCTAAGCCATCATATCCCCTGTGACCTGCGC-TATACAT  
CCAGATGGCCTGAAGTAACTGAAGAATCACAAAAGAAGTGAAAGTGGCCTGTTCTGCCTT  
AACTGATGACATTACCTTGTGAAATTCCTTCTCCTGGCTCATCCTGGCTCAAAAGTCCCCC  
ACTGAGCACCTTGTGA-CCCCACCCCTGCCAGCCAAAA-ATAACCCCCTTTGACTGT-AATT  
TTCCACTACCTACCCAAATCCTATAAAACGACCCACCC-ATCTCCCTTCACTGACTCTCTT  
TTCCGACTCAGCCCACCTGCACCCAGGTGAAATAAACAGTCTTGTTGCTCACACAAAGCCT  
GTTTGGCGGTCTCTTCACATGGACGTGCGTGAAACTGACCACTGTGGGCACATGTCATCAG  
GACCTTCTGAGACTGGGTACAGCCGTGTGTCCTCAAACCTGGCAAAATAAACTTTCTAAA

TTAACTAAGACTTGTCTCAGATTTTCGGGGTTCATGTTATCAATTAAAAACCAAATTTAAAT  
T-AAAAAAGAGGAAAGCAGTGTTGAGGGGGGCATCCTTACCTTGCTCCTGATCTTAGCA  
GGGAAGCTTCAAGTTTCTCACCATTAAAGTGTGACCACTGTTGGCTTTTTGTGAGAGTTTGA  
CAGCTGCAGGCTCCTTATCAAGTTCCCTCTAGTCCTCATTGCTGAGAGCGTTTATCATGAA  
TGGGTGTTGGATTTTGTAGATGATTTTCTGAATCTGC---TATGATCATGTGACTTTTCTTCT  
TTAGCCTGTTGAGGTGATGGATTACATGACTAGATTTTCAAATGCTGAACCAGTTTGTGTA  
CCTGAGATAAATCCCACTCTGTT-----

-----GT  
GGTATATAATTCTTTTTATGCATTGTTTGGATTTGACTTGCTAATTTTTCGTTGAAGATTTTGT  
CATCTATGTTTATGAAAGCTATTGGCTTATGGCTTTCCTTCTTGTGTCTTTGTCTGGTTTTCT  
TTTTAGGGTAATGCTGGCTTATAGAATGCATTAGAAAACATTCCTTTTGCTTCTATTATCTGG  
AAGACATCATAGAAAATTACTATCGTTTCTTCCCTTAAATGTTTGGCAGAATTCATCAGCAAAC  
CTGTTGAGACCTGGTGTCTTCTATTGGAAGGTAATTATTTATTGATTCAATTCCTTTAATGCA  
TACATACCTATTCATATTATCTATTCTTTCTTGTGTAAGTTTGGTAGATTGCATCTTTAAGAAA  
TTGATCCATTTATCTAGGTTATCATATTTCTGGGCATAGAGTTGTTATGGTAATAATATTCTAT  
TATTATCCTTTACAATATTCCTCTAGGATCAGTAGCAGTAG-CCCCATTTTATTCTAATGCTA  
ACAATTTGTGTCTCATTCTTTCTTTGTTAACTTGCCTAGAGGTTTATCAATTCATTCC-----T  
TTTTTTTTTAAAAAGAACCAGCTTTTGGTT---TTGATTTTTCTCTAGTAGGTTCCCTGATTTTCT  
TTTCACTGATGTCTGCTTTAGTTAATTTTTCTGTCTACTATGTTTTTAATTAGTTCTTCTTTTC  
TAGTTTCTTGAGGCGGAACTTAGATGATTGTTTCTGATCTTCTTCTTTTCTAAAATGCCT  
TCTTTCAATGCCATAAACTTTCCTCTAAGCACTGCTTTTGTGTCATCTCACAAATTTGATAA  
GTTGTATTTTCATTTTCATTTATTTCAAATATTGCTTAATTTCTCTGGAGACCTTTTCTTTGA  
CTGATGTGTTATTTAGAAGTGTTTTGTTAATCTCCAGGTATTTTTTAATTTTCCAATTGTCTT  
TCTGTTATTGATTTCTAGTTTGTGTTGTTTCTAGAGAGCATATTTTATTTTATGTTCTTTTAAA  
CTTGTGAGGTGTGCCAGGGCTTAGAATTTGGTCTGTCTTGGTGAATGTTCCACATAAGCAT  
GAGAAGAATGTATTTTGCTGTTGCTTCACAAA-----

--

>Chlorocebus\_aethiops-HERVHF\_3LTR+flanking(+)

---AATGTCAGGCCTCTGAGCCCAAGCTAAGCCATCATATCCCCTGTGACTTGCAC-TATACAT  
CCAGATGGCCTGAAGTAACTGAAGAATCACAAAAGAAGTGAAAGTGGCCTATTCTGCCTT  
AACTGATGACATTACCTTGTGAAATTCCTTCTCCTGGCTCATCCTAGCTCAAAAAGTTCCCCC  
ACTGAGCACCTCGTGA-CCCCACCCCTGCCAGCCAAAA-ATAACCCCTTTGACTGT-AATT  
TTCCACTACCTACCCAAATCCTATAAAACGACCCACCCCTATCTCCCTTCACTGACTCTCTT  
TTCGGACTCAGCCACCTGCACCCAGGTGAAATAAACAGTCTTGTTGCTCACACAAAGCCT  
GTTTGGTGGTCTCTTCACATGGACGTGCATGAACTGGCCACTGTGGGCACATGTCATCAG  
GACCTTCTGAGGCTGGGTACAGCCGTGTGTCCTCAAACCTGGCAAAATAAACTTTCTAAA  
TTAACTAAGACTTGTCTCAGATTTTCGGAGTTCATATTATCAATTAAAAACCAAATTTAAAT  
T-AAAAAAGAGGAAAGCAGTGTTGAGGGGGGCATCCTTACCTTGCTCCTGATCTTAGCAG  
GGAAGCTTCAAGTTTCTCACCATTAAAGTGTGACCACTGTTGGCTTTTTGTG-GAGTTTGTGAC  
AGCTGCAGGCTCCTTATCAAGTTCCCTCTAGTCCTCATTGCTGAGAGCGTTTATCATGAAT  
GGGTGTTGGATTTTGTAGATGATTTTCTGAATCTGC---TATGATCATGTGACTTTTCTTCTT  
TAGCCTGTTGAGGTGATGGATTACATGACTAGATTTTCAAATGCTGAACCAGTTTGTGTAC

CTGAGGTAGTATATAATTCTTTTTATGCATTGTTTGGATTGACTTGCTAATTTTTCGTTGAAG  
 ATTTTTGCATCTATGTTTATGAAAGCTATTGGCTTATGACTTTCCCTTCTTGTGTCTTTGTCTG  
 GTTTTCTTTTAGGGTAATGCTGGCTTTATAGAATGCATTAGAAAACATTCCTTTTGCTTCTAT  
 TATCTGGAAGACATCATAGAAAATTACTATCGTTTCTTCCTTAAATGTTTGGCAGAATTCATC  
 AGCAAACCTGTTTCAGACCTGGTGCTTCCTATTTGGAAGGTAATTATTTATTGATTCAATTCCT  
 TTAATGCATACATACCTATTCATATTATCTATTCTTTCTTGTGTAAGTTTTGGTAGATTGCATCT  
 TTAAGAAATTTTCTTCTTTAGCCTGTTGAGGTGATGTATTACATGACTAGATTTTCAAATGCT  
 GAACCAGTTTTGTGTACCTGAGGTAGTATATAATTCTTTTTATGCATTGTTTGGATTGACTTG  
 CTAATTTTTCGTTGAAGATTTTTGCATCTATGTTTATGAAAGCTATTGGCTTATGACTTTCCCT  
 TCTTGTGTCTTTGTCTGGTTTTCTTTTTAGGGTAATGCTGGCTTTATAGAATGCATTAGAAA  
 CATTCTTTTGCTTCTATTATCTGGAAGACATCATAGAAAATTACTATCGTTTCTTCCTTAAAT  
 GTTTGGCAGAATTCATCAGCAAACCTGTTTCAGACCTGGTGCTTCCTATTTGGAAGGTAATTA  
 TTTATTGATTCAATTCCTTTAATGCATACATACCTATTCATATTATCTATTCTTTCTTGTGTAAGT  
 TTTGGTAGATTGCATCTTTAAGAAATTGATCCATTTTCATCTAGGTTATCATATTTCTGGGCATA  
 GAGTTGTTATGGTAATAATATTCTATTATTATCCTTTACAATATTCCTCTAGGATCAGTAGCAGT  
 GG-CCCCATTTTATTTCTAATGCTAACAATTTGTGTCTCATTTCTTTCTTTGTTAACTTGGCTA  
 GAGGTTTATCAATTCATTCC--TTT-TTTTTTTTTTTTAAAGAACCAGCTTTTGGTT--TTGATT  
 TTTCTCTAGTAGGTTCCCTGATTTTCAGTTTCACTGATGTCTGCTTTAGTTAATTTTTT-----

>Chlorocebus\_sabaeus-HERVHF\_5LTR+flanking(-)

--GAATGTCAGGCCTCTGAGCCCAAGCTAAGCCATCATATCCCCTGTGACTTGCAC-TATACAT  
 CCAGATGGCCTGAAGTAACTGAAGAATCACAAAAGAAGTGAAAGTGGCCTATTCTGCCTT  
 AACTGATGACATTACCTTGTGAAATTCCTTCTCCTGGCTCATCCTAGCTCAAAAGTTCCCCC  
 ACTGAGCACCTCGTGA-CCCCACCCCTGCCAGCCAAAA-ATAACCCCTTTGACTGT-AATT  
 TTCCACTACCTACCCAAATCCTATAAAACGACCCACCCCTATCTCCCTTCACTGACTCTCTT  
 TTCGGACTCAGCCCACCTGCACCCAGGTGAAATAAATAGTCTTGTTGCTCACACAAAGCCT  
 GTTTGGTGGTCTCTTCACATGGACGTGCATGAACTGGCCACTGTGGGCACATGTCATCAG  
 GACCTTCTGAGGCTGGGTACAGCCGTGTGTCCTCAAACCTGGCAAAATAAACTTTCTAAA  
 TTAATAAGACTTGTCTCAGATTTTCGGAGTTCATATTATCAATTAAAAACCAAAATTTAAAT  
 T--AAAAAAGAGGAAAGCAGTGTTGAGGGGGGCATCCTTACCTTGCTCCTGATCTTAGCAG  
 GGAAGCTTCAAGTTTCTCACCATTAAAGTGTGACCACTGTTGGCTTTTTGTC-GAGTTTGTAC  
 AGCTGCAGGCTCCTTATCAAGTTCCCTCTAGTCCTCATTTGCTGAGAGCGTTTATCATGAAT  
 GGGTGTTGGATTTTGTAGATGATTTTCTGAATCTGC---TATGATCATGTGACTTTTCTTCTT  
 TAGCCTGTTGAGGTGATGGATTACATGACTAGATTTTCAAATGCTGAACCAGTTTTGTGTAC  
 CTGAG-----

-----GTAGTATATAAT  
 TCTTTTTATGCATTGTTTGGATTGACTTGCTAATTTTTCGTTGAAGATTTTTGCATCTATGTTT  
 ATGAAAGCTATTGGCTTATGACTTTCCCTTCTTGTGTCTTTGTCTGGTTTTCTTTTAGGGTAA  
 TGCTGGCTTTATAGAATGCATTAGAAAACATTCCTTTTGCTTCTATTATCTGGAAGACATCAT

AGAAAATTACTATCGTTTCTTCCTTAAATGTTTGGCAGAATTCATCAGCAAACCTGTTTCAGA  
CCTGGTGCTTCCTATTTGGAAGGTAATTATTTATTGATTCAATTCCTTTAATGCATACATACCTA  
TTCATATTATCTATTCTTTCTTGTGTAAAGTTTGGTAGATTGCATCTTTAAGAAATTGATCCATT  
TCATCTAGGTTATCATATTTCTGGGCATAGAGTTGTTATGGTAATAATATTCTATTATTATCCTTT  
ACAATATTCCTCTAGGATCAGTAGCAGTGG-CCCCTATTTTATTCTAATGCTAACAATTTGTG  
TCTCATTTCTTTCTTTGTAACTTGGCTAGAGGTTTATCAATTTCAATTCC-TTTT-TTTTTTTTTT  
TTAAAGAACCAGCTTTTGGTT--TTGATTTTCTCTAGTAGGTTCCCTGATTTCAGTTTCACTGA  
TGTCTGCTTTAGTTAATTTTTCTGTCTACTATGTTTTTAATTAGTTCTTCTTTTCTAGTTTCTT  
GAGGTGGAACTTAGATGATTTGTTTCTGATCTTCTTCTTTTCTAAAATGCCTTCTTTCAAT  
GCCATAAACTTTCCCTCTAAGCACTGCTTTTGTGTCATCTCACAAATTTTGATAAGTTGTATTT  
TCATTTTCATTTATTTCAAAATATTGCTTAATTTCTCTGGAGACCTTTTCCTTTGACTGATGTG  
TTATTTAGAAGTGTTTGTGTTGATCTCCAGGTATTTTTTAATTTTCTAATTGTCTTCCTGTTATT  
GATTTCTAGTTTTGTTGTGTTTCAGAGAGCATATTTTATTTTTTAGTTCTTTTAAACTTGTTGAG  
GTGTGTCATGGCTTAGAATTTGGTCTGTCTTGGTGAATGTTCCACATAAGCATGAGAAGAAT  
GTATTTTGCTGTTGCTTCACAAAATATTCCATAGATA-----

>Colobus\_guereza-HERVHF\_5LTR+flanking(-)

--GAATGTCAGGCCTCTGAGCCCAAGCTAAGCCATCATATCCCCTGTGACCTGCAC-TATACAT  
CCAGATGGCCTGAAGTAAGTGAAGAATCACAAAAGAAGTGAAGTGAAGTGAAGTGAAGTGAAGT  
AACTGATGACATTACCTTGTGAAATTCCTTCTCCTGGCTCATCCTGGCTCGAAAGCTCCCC  
ACTGAGCACCTTGTGA-CCCCACCCC-GCCAGCCAAAAGACAACCCCTTTGACTGT-AAT  
TTTCCACTACCTACCCAAATATTATAAAACGGCCCCACCCT-ATCTCCCTTCACTGACTCTCTT  
TTTGGACTCAGCCCACCTGCACCCAGGTGAAGTAAACAGTCTTGTGCTCACGCAAAGCCT  
GTTTGGTGGTCTCTTCACACAGACGTGTGCGAAACTGACCACTGTGGGCACCTGTCATTAG  
GACCTTCTGAGGCTGGGTCCTCAGCCGTGTGTCCTCAAACCTGGGCACAATAAACTTTCTAAA  
CTAACTGAGACCTGTCTCAGATTTTTAGGGTTCATATTATCAATTAATAAAACCAAATTTACAT  
T---AAAAAAGGAAAGCAGTGTTGAGGGGGGCATCCTTACCTTGCTCCTGATCTTAGCAGG  
GACACTTCAAGTTTCTCACCATTAAAGTGTGACCACTGTGGGCTTTACATC-CGGT-----CG  
GGCTCCTTACCAAGTTCCCCTCTAGTCCTCATTTGCTGAGAGTGTTTATCATGAATGGGTGTT  
GGATTTTGTTAGATGCTTTTTCTGAATCTGC---TATGATCATGTGACTTTTCTTCTTCAGCCTA  
TTGTGGTGATGGATTACATGACTAGATTTTCATATGCTGAACCAGTTTGTGTACCTGAGATA  
AGTCCCCTCTGTT-----

-----GTGGTATATAAT  
TCTTTTTATGCATTGTTTGGATTTGACTTGCTAATTTTTCGTTGAAGATTTTGCATCTATGTTT  
ATGAAAGCTATTGGCTTATGGCTTCCCTTCTTGTGCTTTTGTCTGGTTTTGTTTTAGGGTA  
ACGCTGGCTTTATAGAATGAGTCAGAAAACATTCCTTTTGCTTCTATTATCTGGAAGACATCA  
TAGAAAATTACTGTCATTTCTTCCTTAAATGTTTGGTAGAATTCATCAGCAAACCCGTTTCAGA  
CCTGGTGTTTCCCTATTTGGAAGGTAATTATTTATTGATTCAATTCCTTTAATGCATACATACCTA  
TTCATATTATCTATTCTTTCTTGTGTAAAGTTTGGTAGATTGCATCTTTCAGAAATTGATCCATT  
TCATCTAGGTTATCATATTGCTGGGCATAGAGTTGTTATGGTAATAATATTCTATTATTATCCTT  
TACAACATTCCTTTAGGATCAGTAGCAGTGG-CCCCTATTTTATTCTAATGCTAATAATTTGT  
GTCTCATTTCTTTCTTTGTAACTTGGCTAGAGGTTTATCAATTTCAATTGC-----TTTTTTTTT  
AAAGATCCAGCTTTCGGTTTTGTTGATTTTTCTCTAGTAGGTTCCCTGATTTCAGTTTCACTGA

TGTCTGCTTTAGTTAATTTTTCTGTCTACTATGTTTTTAATTAGTTCTTCTTTTCTAGTTTCTT  
 GAGGTGGAACTTAGATGATTTGTTTCTGATCTTCTTCTTTTCTAAAATGCCTTCTTTCAAT  
 GCCATAAACTTTCCCTCTAAGCACTGCTTTTGTGTCATCTCACAAATTTTGATAAGTTGTATTT  
 TCATTTTCATTTATTTCAAAATATTGCTTAATTTCTCTGGAGACCTTTTCCTTTGACTGATGTG  
 TTATTTAGAAGTGTTTGTTTAATCTCCAGGTATTTTTTAATTTTCCAGTTGTCTTCTGTTATT  
 GATTTCTAGTTTTATTGTATTCAGAGAGCATATTTTATTTTTTAGTTCTTTTAAACCTGTTGAG  
 GTGTGTCAGGGCTTAGAATTTGGTCTATCTTGGTGAATGTTCCACATGAGCGTGAGAAGAAT  
 GTATTTTGCTGTTGCTTCACAAAATATTCTACAGATAT-----  
 >Erythrocebus\_patas-HERVHF\_5LTR+flanking(-)  
 --GAATGTCAGGCCTCTGAGCCCAAGCTAAGCCATCATATCCCCTGTGACCTGCAC-TATACAT  
 CCAGATGGCCTGAAGTAACTGAAGAATCACAAAAGAAGTGAAGGTGGCCTATTCTGCTT  
 AACTGATGACATTACCTTGTGAAATTCCTTCTCCTGGCTCATCCTGGCTCAAAAGTTCCCCC  
 ACTGAGCACCTTGTGA-CCCCACCCCTGCCAGCCAAAA-ATAACCCCTTTGACTGT-AATT  
 TCCCACTACCTACCCAAATCCTATAAAACGACCCACCCCTATCTCCCTTCACTGACTCTCTT  
 TTCGGACTCAGCCCACCTGCACCCAGGTGAAATAAACAGTCTTGTTGCTCACACAAAGCCT  
 GTTTGGTGGTCTCTTCACATGGACGTGCGTGAAACTGACCACTGTGGGCACATGTCATCAG  
 GATCTTCTGAGGCTGGGTCACAGCCGTGTGTCTCAAACCTGGCAAAATAAACTTTCTAAAT  
 TAACTAAGACTTGTCTCAGATTTTCGGGGTTCATATTATCAATTAAAAACCAAAATTTAAATT-  
 AAAAAAAGAGGAAAGCAGTGTTGAGGGGGGCGTCCTTACCTTGCTCCTGATCTTAGCAG  
 GGAAGCTTCAAGTTTCTCACCATTAAAGTGTGACCACTGTTGGCTTTTTGTC-GAGTTTTGAC  
 AGCTGCAGGCTCCTTATCAAGTTCCCCTCTAGTCCTCATTTGCTGAGAGCGTTTATCATGAAT  
 GGGTGTTGGATTTTGTAGATGATTTTCTGAATCTGC---TATGATCATGTGACTTTTCTTCTT  
 TAGCCTGTTGAGGTGATGGATTACATGACTAGATTTTCAAATGCTGAACTAGTTTTGTGTACC  
 TGAG-----  
 -----  
 -----  
 -----GTGGTATATAATT  
 CTTTTTATGCATTGTTTGGATTGACTTGCTAATTTTCGTTGAAGATTTTGCATCTATGTTTA  
 TGAAAGCTACTGGCTTATGATTTCCCTTCTTGTGTCTTTGTCTGGTTTTCTTTTAGGGTAAT  
 GCTGGCTTTATAGAATGCATTAGAAAACATTCCCTTTTGCTTCTATTATCTGGAAGACATCATA  
 GAAAATTACTATCGTTTCTTCCTTAAATGTTTGGCAGAATTCATCAGCAAACCTGTTTCAGAC  
 CTGGTGCTTCCTATTTGGAAGGTAATTATTTATTGATTCAATTCCTTTAATGCATACATACCTAT  
 TCATATTATCTATTCTTCTTGTGTAAGTTTTGGTAGATTGCATCTTTAAGAAATTGATCCATTT  
 CATCTAGGTTATCATATTTCTGGGCATAGAGTTGTTATGGCAATAATTTCTATTATTATCCTTT  
 ACAATATTCCTCTAGGATCAGTAGCAGTGG-CCCCATTTTATTCTAATGCTAACAAATTTGTG  
 TCTCATTTCTTTCTTTGTTAACTTGGCTAGAGGTTTATCAATTCATTCC-TTTT-TTTTTTTTTT  
 TTTAAGAACCAGCTTTTGGTT--TTGATTTTCTCTAGTAGGTTCCCTGATTTCACTTTCACTGA  
 TGTCTGCTCTAGTTAATTTTTCTGTCTACTATGTTTTTAATTAGTTCTTCTTTTCTAGTTTCTT  
 GAGGTGAAAACCTTAGATGATTTGTTTCTGATCTTCTTCTTTTCTAAAATGCCTTCTTTCAAT  
 GCCATAAACGTTCCCTCTAAGCACTGCTTTTGTGTCATCTCACAAATTTTGATAAGTTGTATTT  
 TCATTTTCATTTATTTCAAAATATTGCTTAATTTCTCTGGAGACCTTTTCCTTTGACTGATGTG  
 TTATTTAGAAGTGTTTGTTTGATCTCCAGGTATTTTTTAATTTCCAATTGTCTTCCCTGTTATT  
 GATTTCTAGTTTTGTTGTGTTTCAGAGAGCATATTTTATTTTTTAGTTCTTTTAAACTTGTGAG  
 GTGTGTCACGGCTTAGAATTTGGTCTGTCTTGGTGAATGTTCCACATAAGCATGAGAAGAAT



GTATTTTGCTGTTGCTTCACAAAATATTCCATAGAT-----

>Homo\_sapiens-HERVHF\_5LTR+flanking(-)

--GAATGTCAGGCCTCTGAGCCCAAGCTAAGCCATCGTATCCCCTGTGACCTGCACATATACA  
TCCAGATGGCCTGAAGTAACTGAAGAATCACAAAAGAAGTGAAAATGGCCTGTTCTGCCT  
TAACTGATGACATTACCTTGTGAAATTCCTTCTCCTGGCTCATCCTGGTTCAAAAGCTCCCC  
AACTCAGCACCTTGTGA-CCTCCACCCCTGCCAGCCATAAAACAACCCCTTTGACTGT-AA  
TTTTCCACTACCTACCCAAATCCTATAAAATGGCCCCACCCCTATCTCCCTTCCCTGACACTG  
TTTTCGGACTCAGCCCGCTGCACCCAGGTGAAATAAACAGCCTTGTGCTCACACAAAGC  
CTGTTTGGTGGTCTCTTCACAGGGACGTGCGTGAAACTGACCACCTTGGACACATGTCATC  
AGGACCTCCTGAGGCTGGGTACAGCCTTGTGACCTCAAACCTTGGCAAAATAAACTTTCTA  
AATTAAGTGAACCTGTCTCAGATTTTCGAGGTTTCATATTATCAATTAAAAACCAAAATTTAA  
ATT-AAAAAAAAAAGGAAAGCAGTGTTGAGGAGGGCATTCTTACCTTGCTCCTGATCTTAGC  
AGGGAAGCTTCAAGTTTCTCAACTTTAAGTGCAACCACTGTTGGCTTTTTGTT-GAGCTTTG  
ACAGCTGTGGGTTCCCTTATCAAGTTCCCCTCTAGTCATC-TTGTGCTGAGAGCTTTTATCATGA  
ATGGGTGTTGGATTTTGTAGATGCTTTTTCTGAATCTGCTGATATGATCATGTGATTTTTCTT  
CTTAAGCCTGTTGAGGTGATGGATTACATGACTAGATTTTCAAATGCTGAACCACTTTTGTG  
TACCTGAGATAAATCCCACTCGGTT-----

-----

-----

GTGGTATATAATTCTTTTTATGCATTG-TTGGATTTGACTTGCTAATTTTTTCATCGAAGATTTTT  
GCACCTATGTTTACGAAAGCTATTGGCTTATGGCTTCCCTCCTTGTGTCTTTGTCTGGTTTT  
GGTTTTAGAGTAATGCTGGCTTTATAGAATGAGTTACAAAACATTCCTTTTGCTTCTATTATCT  
GGAAGACATCATAGAAAATTACTATCATTTCTTCCTTAAATGTTTGGTAGAGTTCATCAGTGA  
ACCCATTACAGACCTAGTTCTTTCTGTTTGAAGGTAGTTATTTATTGATTCAATTCCTTTAATG  
CATACATACCTATTATATTATCTATTCTTTCTTGTGTAAAGTTTGGTAGATTGCATCTTTAAGA  
AATTGATCTATTTCTTCTAGGTTATTATATTGTGGGCACAGAGTTGTTATGGTAATAACATTC  
TATTATTATCCTTTACAATATTCCTTTAGAATCAGTAGCAGTGG-CCTCTATTTTATTTCTAATG  
CTAATAATTTGTGTCTCATTTCTTTCTTTGTTAACTTGGCTAGAGGTTTATCAATTTCATAGG---  
---TTTTTTTTTTTTAAAGAACCAGCTTTTGGTTTTGTTGA-TTTTCTCTAGTAGGTTCTGATT  
CAGTTTCATTGATGTCTGCTTTAGTTAATTTTTCTGTCTACTCTGTTTTTAATTAG---TTCTTT  
TCTAGTTTCTTGAGGTGGAACTTAGATGATTGTTTCAGATCTTCTTCTTTTCTAAAATGC  
CTTATTTCAATGCCATAAACTTTCTTCTAAACACTGCTTTTGTGTCATCTCACAAATTTTGATA  
AGTTGTATTTTCATTTTCATTTATTTCAAAATATTGCTTAATTTCTCTGGAGACCTTTTCTTTA  
ACTGACGTGTTATTTAGAAGTGTGTTGTTTAACTCCAGGTATTTTTTAATTTTCCAATTGTCT  
TTCTGTTATTGATTTCTAGTTTATTGTGTTTCAGAGAGCATATTTTATTTTCCATTCTTTAAA  
CTTGTTGAGGTGTGTCAGGGCTTAGAATTTGGTCTATCTTGGTGAATGTTCCACGTGAACCTT  
GAGAAGAATGTATTTTGCTGTCGCTTAACAA-----

-

>Lophocebus\_aterrimus-HERVHF\_5LTR+flanking(-)

--GAATGTCAGGCCTCTGAGCCCAAGCTAAGCCATCATATCCCCTGTGACCTGCAC-TATACAT  
CCAGATGGCCTGAAGTAACTGAAGAATCACAAAAGAAGTGAAAGTGGCCTATTCTGCCTT  
AACTGATGACATTAATTTGTGAAATTCCTTCTCCTGGCTCATCCTGGCTCAAAAGTTCCCCC  
ACTGAGCACCTTGTGATCCCCACCCCTGCCAGCCAAAA-ATAACCCCTTTGACTGT-AATT

TTCCACTACCTACCCAAATCCTATAAAACGACCCCAACCCTATCTCCCTTCACTGACTCTCTT  
TTCGGACTCAGCCCACCTGCACCCAGGTGAAATAAACAGTCTTGTTGCTCACACAAAGCCT  
GTTTGGTGGTCTCTTCACATGGACGTGCGTGAAACTGACCACTGTGGGCACATGTCATCAG  
GACCTTCTGAGGCTGGGTACAGCCGTGTGTCCTCAAACCTGGCAAAATAAACTTTCTAAA  
TTAACTAAGACTTGTCTCAGATTTTCGGGGTTCATATTATCAATTAATAAAACAAAATTTAAAT  
T-TAAAAAAGAGGAAAGCAGTGTTGAAGGGGGCATCCTTACCTTGCTCCTGATCTTAGCA  
GGGAAGCTTCAAGTTTCTCACCATTAAAGTGTGACCACTGTTGGCTTTTTGTC-GAGTTTTGA  
CAGCTGCAGGCTCCTTATCAAATCCCTCTAGTCCTCATTTGCTGAGAGCGTTTATCATGAA  
TGGGTGTTGGATTTTGTAGATGATTTTCTGAATCTGC---TATGATCATGTGACTTTTCTTCT  
TTAGCCTGTTGAGGTGACGGATTACATGACTAGATTTTCAAATGCTGAACCAGTTTGTGTA  
CCTGAGATAAATCCCACTCTGTT-----

-----GT  
GGTATATAATTCTTTTTATGCATTGTTTGGATTTGACTTGCTAATTTTTCGTTGAAGATTTTG  
CATCTATGTTTATGAAAGCTATTGGCTTATGGCTTTCCTTCTTGTTGCTTTTGCTCGTTTTGT  
TTTTAGGGTAATGCTGGCTTTATAGAATGCGTTAGAAAACATTCCTTTTGCTTCTATTATCTGG  
AAGACATCATAGAAAATTACTATAGTTTCTTCCTTAAATGTTTGGCAGAATTCATCAGCAAAC  
CCGTTCAAGACCTGGTGCTTCCTATTTGGAAGGTAATTATTTATTGATTCAATTCCTTTAATGCA  
TACGTACCTATTCATATTATCTATTCTTTCTTGTTGTAAGTTTGGTAGATTGCATCTTTAAGAAA  
TTGATCCATTTATCTAGGTTATCATATTTCTGGGCATAGAGTTGTTATGGTAATAATATTCTAT  
TATTATCCTTTACAATATTCCTCTAGGATCAGTAGCAGTGG-CCCCTATTTATTCTAATGCTA  
ATAATTTGTGTCTCATTTCTTTCTTTGTTAACTTGGCTAGAGGTTTATCAATTTCAATCC-----T  
TTTTTTTTTTCAAAGAACCAGCTCTTGGTT---TTGATTTTTCTCTAGTAGGTTCTGATTTTCTAG  
TTTCACTGATGTCTGCTTTAGTTAATTTTTCTGTCTACTATGTTTTTAATTAGTTCTTCTTTTC  
TAGTTTCTTGAGGTGGAACTTAGATGATTTGTTTCTGATCTTTCTTCTTTTCTAAATGCCT  
TCTTTCAATGCCATAAACTTTCCTCTAAGCACTGCTTTTGTTGCATCTCACAAATTTGATAA  
GTTGTATTTTCATTTTCATTIATTTCAAATATTGCTTAATTTCTCTGGAGACCTTTTCTTTGA  
CTGATGTGTTATTTAGAAGTGTTTGTGTTAATCTCCAGGTATTTTTTAATTTTCCAATTGTCTT  
TCTGTTATTGATTTCTAGTTTATTGTGTTTCTAGAGAGCATATTGTATTTTTTAGTTCTTTTAAAC  
TTGTTGAGGTGTGTCAGGGCTTAGAATCTGGTCTGTCTTGGTGAATGTTCCACATAAGCATG  
AGAAGAATGTATTTGCTGTTGCTTCACGA-----

>Macaca\_mulatta-HERVHF\_5LTR+flanking(-)

--GAATGTCAGGCCTCTGAGCCCAAGCTAAGCCATCATATCCCCTGTGACCTGCCC-TATACAT  
CCAGATGGCCTGAAGTAACTGAAGAATCACAAAAGAAGTGAAAGTGGCCTGTTCTCTGCCTT  
AACTGATGACATTACCTTGTGAAATTCCTTCTCTGGCTCATCCTGGCTCAAAAGTCCCCC  
ACTGAGCACCTTGTGA-CCCCACCCCTGCTAGCCAAAA-ATAACCCCTTTGACTGT-AATT  
TTCCACTACCTACCCAAATCCTATAAAACGACCCCAACCCTATCTCCCTTCACTGACTCTCTT  
TTCGGACTCAGCCCACCTGCACCCAGGTGAAATAAACAGTCTTGTTGCTCACACAAAGCCT  
GTTTGGTGGTCTCTTCACATGGACGTGCGTGAAACTGACCACTGTGGGCACATGTCATCAG  
GACCTTCTGAGGCTGGGTACAGCCGTGTGTCCTCAAACCTGGCAAAATAAACTTTCTAAA  
TTAACTAAGACTTGTCTCAGATTTTCGGGGTTCATATTATCAATTAATAAAACAAAATTTAAAT  
T-TAAAAAAGAGGAAAGCAGTGTTGAGGGGGGCATCCTTATCTTGCTCCTAATCTTAGCAG  
GGAAGCTTCAAGTTTCTCACCATTAAAGTGTGACCACTGTTGGCTTTTTGTT-GAGTTTTGAC

AGCTGCAGGCTCCTTATCAAGTTCCCCTCTAGTCCTCATTGCTGAGAGCGTTTATCATGAAT  
GGGTGTTGGATTTTGTAGATGATTTTCTGAATCTGC---TATGATCATGTGACTTTTTTCTTT  
AGCCTGTTGAGGTGATGGATTACATGACTAGATTTTCAAATGCTGAACCAGTTTGTGTACC  
TGAGATAAATCCCACTCTGTT-----

-----GTGG  
TATATAATTCTTTTATGCATTGTTTGGATTGACTTGCTAATTTTTCATTGAAGATTTTGCAT  
CTATGTTTATGAAAGCTATTGGCTTATGGCTTTCCTTCTTGTGTCTTGTCTGGTTTTGTTTT  
TAGGGTAATGCTGGCTTATAGAATGTGTTAGAAAACATTCCTTTGTCTTATTATCTGGAA  
GACATCATAGAAAATTACTATCATTTCTTCCTTAAATGTTTGGCAGAATTCATCAGCAAACCC  
GTTGAGACCTGGTGCTTCCTATTGGAAGGTAATTATTTATTGATTCAATTCCTTTAATGCATA  
CATACCTATTCATATTATCTATTCTTCTTGTGTAAGTTTGGTAGATTGCATCTTTAAGAAATT  
GATCCATTTTCATCTAGGTTATCATATTTCTGGGCATAGAGTTGTTATGGTAATAATTCTATTA  
TTATCCTTTACAATATTCCTCTAGGATCAGTAGCAGTGG-CCCCTATTTATTTCTAATGCTAAT  
AATTTGTGTCTCATTTCTTTCTTTGTAACTTGGCTAGAGGTTTATCAATTTTCATTCC-----TTT  
TTTTTTTCAAAAACAGCTTTTGGTT--TTGATTTTCTCTAGTAGGTTCCCTGATTTTCAGTTT  
CACTGATGTCTGCTTTAGTTAATTTTTCTGTCTACTATGTTTTTAATTAGTTCTTCTTTTCTAG  
TTTCTTGAGGTGGAAACTTAGATGATTTGTTTCTGATCTTCTTCTTTTCTAAAATGCCTTCTT  
TCAATGCCATAAACTTTCCTCTAAGCACTGCTTTTGTGTCATCTCACAAATTTGATAAGTTG  
TATTTTCATTTTCATTTATTTCAAAATATTGCTTAATTTCTCTGGAGACCTTTTCCTTTGACTGA  
TGTGTTATTTAGAAGTGTTTTGTTTAATCTCCAGGTATTTTTTAATTTTCCAATTGTCTTTCTG  
TTATTGATTCTAGTTTTATTGTGTTGAGAGAGCATATTTTATTTTTTAGTTCTTTTAACTTGT  
TGAGGTGTGTCAGGGCTTAGAATCTGGTCTGTCTTGGTGAATGTTCCACATAAGCACGAGA  
AGAATGTATTTTGTGTTGCTTCATGAAA-----

>Macaca\_silenus-HERVHF\_3LTR+flanking(+)

---AATGTCAGGCCTCTGAGCCCAAGCTAAGCCATCATATCCCCTGTGACCTGCAC-TATACAT  
CTAGATGGCCTGAAGTAACTGAAGAATCACAAAAGAAGTGAAAGTGGCCTGTTCTGCCTT  
AACTGATGACATTACCTTGTGAAATTCCTTCTCCTGGCTCATCCTGGCTCAAAAGTTCCCCC  
ACTGAGCACCTTGTGA-CCCCACCCCTGCCAGCCAAAA-ATAACCCCTTTGACTGT-AATT  
TTCCACTACCTACCCAAATCCTATAAAACGACCCACCCCTATCTCCCTTCACTGACTCTCTT  
TTCGGA CTCAGCCACCTGCACCCAGGTGAAATAAACAGTCTTGTTGCTCACACAAAGCCT  
GTTTGGTGGTCTCTTCACATGGACGTGCGTGAAACTGACCACTGTGGGCACATGTCATCAG  
GACCTTCTGAGGCTGGGTCACAGCCGTGTGTCCTCAAACCTTGGCAAAATAAACTTTCTAAA  
TTAACTAAGACTTGTCTCAGATTTTCGGGGTTCATATTATCAATTAAAAAACAAAATTTAAAT  
T-TAAAAAAGAGGAAAGCAGTGTTGAGGGGGGCATCCTTACCTTGCTCCTAATCTTAGCAG  
GGAAGCTTCAAGTTTCTCACCATTAAAGTGTGACCACTGTTGGCTTTTTGTA-GAGTTTGTAC  
AGCTGCAGGCTCCTTATCAAGTTCCCCTCTAGTCCTCATTGCTGAGAGCGTTTATCATGAAT  
GGGTGTTGGATTTTGTAGATGATTTTCTGAATCTGC---TATGATCATGTGACTTTTTTCTTT  
AGCCTGTTGAGGTGATGGATTACATGACTAGATTTTCAAATGCTGAACCAGTTTGTGTACC  
TGAGATAAATCCCACTCTGTT-----

-----GTGG

TATATAATTCTTTTTATGCATTGTTTGGATTGACTTGCTAATTTTTTCGTTGAAGATTTTTGCAT  
 CTATGTTTATGAAAGCTATTGGCTTATGGCTTTCCTTCTTGTGTCTTTGTCTGGTTTTGTTTT  
 TAGGGTAATGCTGGCTTTATAGAATGTGTTAGAAAACATTCCTTTTGCTTCTATTATCTGGAA  
 GACATCATAGAAAATTACTATCATTTCTTCCTTAAATGTTTGGCAGAATTCATCAGCAAACCC  
 ATTCAGACCTGGTGCTTCCATTTGGAAGGTAATTATTTATTGATTCAATTCCTTTAATGCATA  
 CATACCTATTCAATTATCTATTCTTTCTTGTGTAAGTTTTGGTAGATTGCATCTTTAAGAAATT  
 GATCCATTTTCATCTAGGTTATCATATTTCTGGGCATAGAGTTGTTATGGTAATAATATTCTATTA  
 TTATCCTTTACAATATTCCTCTAGGATCAGTAGCAGTGG-CCCCTATTTTATTCTAATGCTAAT  
 AATTTGTGTCTCATTTCTTTCTTTGTTAACTTGGCTAGAGGTTTATCAATTTCAATCC-----TTT  
 TTTTTCCCAAAAAACCAGCTTTTGGTT---TTGATTTTTCTCTAGTAGGTTCCCTGATTTTCAGTTT  
 CACTGATGTCTGCTTTAGTTAATTTTTCTGTCTACTATGTTTTTAATTAGTTCTTCTTTTCTAG  
 TTTCTTGAGGTGGAACTTAGATGATTTGTTTCTGATCTTTCTTCTTTCTAAAATGCCTTCTT  
 TCAATGCCATAAACTTTCCTCTAAGCACTGCTTTTGTGTCATCTCACAAATTTTGATAAGTTG  
 TATTTTCATTTTCATTTATTTCAAAATATTGCTTAATTTCTCTGGAGACCTTTTCCTTTGACTGA  
 TGTGTTATTTAGAAGTGTTTTGTTTAATCTCCAGGTATTTTTTAATTTCCAATTGTCTTTCTG  
 TTATTGATTTCTAGTTTTATTGTGTTTCAGAGAGCATATTTTATTTTTTAGTTCTTTTAACTTGT  
 TGAGGTGTGTCAGGGCTTAGAATCTGGTCTGTCTTGGTGAATGTTCCACATAAGCATGAGA  
 AGAATGTATTTTGCTGTTGCTTCATGAAAT-----

>Mandrillus\_leucophaeus-HERVHF\_3LTR+flanking(+)

---AATGTCAGGCCTCTGAGCCCAAGCTAAGCCATCATATCCCCTGTGACCTGCAC-TATACAT  
 CCAGATGGCCTGAAGTAACTGAAGAATCACAAAAGAAGTGAAAGTGGCCTGTTCTCGCCTT  
 AACTGATGACATTAATTTGTGAAATTCCTTCTCCTGGCTCATCCTGGCTCAAAAGTTCCCCC  
 ACTGAGCACCTTGTGA-CCCCACCCCTGTCAGCCAAAA-ATAACCCCTTTGACTGT-AATT  
 TTCCACTACCTACCCAAATCCTATAAAACGACCCCAACCCCATCTCCCTTCAGTGACTCTCTT  
 TTCGGAATCAGCCCGCCTGCACCCAGGTGAAATAAACAGCCTTGTTGCTCACGCAAAGCCT  
 GTTTGGTGGTCTCTTCACATGGACGTGCGTGAACTGACCACTGTGGGCACATGTCATCAG  
 GACCTTCTGAGGCTGGGTACAGCCGTGTGTCCTCAAACCTGGCAAAATAAACTTTCTAAA  
 TTAACCTAAGACTTGTCTCAGATTTTCGGGGTTCATATTATCAATTAAAAAACAAATTTAAAT  
 T-TAAAAAAGAGGAAAGCAGTGTTGAGGGGGGCATCCTTACCTTGCTCCTGATCTCAGCA  
 GGAAGCTTCAAGTTTCTCACCATTAAAGTGTGACCACTGTTGGCTTTTTGTG-CAGTTTTGA  
 CAGCTGCAGGCTCCTTATCAAGTTCCCTCTAGTCCTCATTTGCTGAGAGCGTTTATCATGAA  
 TGGGTGTTGGATTTTGTAGATGATTTTCTGAATCTGC---TATGATCATGTGACTTTTCTTCT  
 TTAGCCTGTTGAGGTGATGGATTACATGACTAGATTTTCAAATGCTGAACCAGTTTTGTGTA  
 CCTGAGATAAATCCCACTCTGTT-----

-----GT  
 GGTATATAATTCTTTTTATGCATTGTTTGGATTGACTTGCTAATTTTTTCGTTGAAGATTTTTG  
 CATCTATGTTTATGAAAGCTATTGGCTTATGGCTTTCCTTCTTGTGTCTTTGTCTGGTTTTGT  
 TTTTAGGGTAATGCTGGCTTTATAGAATGCGTTAGAAAACATTCCTTTTGCTTCTATTATCTGG  
 AAGACATCATAGAAAATTACTATCTTTTCTTCCTTAAATGTTTGGCAGAATTCATCAGCAAAC  
 CTGTTACACCTGGTGCTTCCATTTGGAAGGTAATTATTTATTGATTCAATTCCTTTAATGCA  
 TACATACCTATTCAATTATCTATTCTTTCTTGTGTAAGTTTTGGTAGATTGCATCTTTAAGAAA  
 TTGATCCATTTTCATCTAGGTTATCATATTTCTGGGCATAGAGTTGTTATGGTAATAATATTCTAT

TATTATCCTTTACAATATTCCTCTAGGATCAGTAGCAGTGG-CCCCTATTTTATTTCTAATGCTA  
ATAATTTGTGTCTCATTTCTTTCTTTGTAACTTGGCTAGAGGTTTATCAATTTTATTCC-----  
TTTTTTTTTCAAAGAACCAGCTTTTGGTT--TTGATTTTTCTCTAGTAGGTTTCTGATTTCAGT  
TTCAGTGATGTCTGCTTTAGTTAATTTTTCTGTCTACTATGTTTTTAATTAGTTCTTCTTTTCT  
AGTTTCTTGAGGTGGAACTTAGATGATTGTTTCTGATCTTCTTCTTTTCTAAAATGCCTT  
CTTTCAATGCCATAAACTTTCTCTAAGCACTGCTTTTGTGTCATCTCACAAATTTTGATAAG  
TTGTATTTTCATTTTCATTTATTTCAAATATTGCTTAATTTCTCTGGAGACCTTTTCTGTGA  
CTGATGTGTTATTTAGAAGTGTTTTGTTAATCCCCAGGTATTTTTTAATTTCCAGTTGTCTT  
TCTGTTATTGATTTCTAGTTTTATTGTGTTTCTAGAGAGCATATTTATTTTTTAGTTCTTTTAAAC  
TTGTTGAGGTGTGTCAGGGCTTAGAATCTGGTCCGTCTTGGTGAATGTTCCACATAAGCATG  
AGAAGAATGTATTTTGCTGTTGCTTCACGAAATA-----

--

>Pongo\_abelii-HERVHF\_5LTR+flanking(-)

--GAATGTCAGGCCTCTGAGCCCAAGCTAAGCCATCGTATCCCATGTGACCTGCACGTACACA  
TCCAGATGGCCTGAAGTAACTGAAGAATCACAAAAGAAGTGAAAATGGCCTGTTTCTGCCT  
TAACTGATGATATTACCTTGTGAAATTCCTTCTCCTGGCTCATCCTGGTTCAAAGCTCCCCA  
ACTGAGCACCTTGTGA-CCCCACCCCTGCCAGCCAGTAAACAACCCCTTTGACTGT-AAT  
TTTCCACTACCTACCCAAATCCTATAAAACGGCCCCACCCCTATCTCCCTTCCCTGACTCTCT  
TTTCGGACTCAGCCCGCCTGCACCGAGG-----TGCTCACACAAAGCCTGTTTAGTG  
GTCTCTTCACAGGGACGCGCGTGAACTGACCACCTTGGACACATGTCATCATTACCTCCT  
GAGGCTGGGTATAGCCCTGTGTCCTCAAACCTTGGCAAAATAAACTTTCTAAATTAAGTGA  
ACCTGTCTCAGATTTTGTAGGTTTATATTATCAATTAATAAACCAAAATTTAAATTAATAA  
AAAAGGAAAGCAGTGTTGAGGAGGGCATCCTTACCTTGCTCCTGATCTTAGCAGGGAAGCT  
TCAAGTTTCTCAACTTTAAGTGCAGGACTGTTGGCTTTTTGTT-GAGCTTTGACAGCTGTG  
GGTTCCTTATCAAGTTCCCCTCTAGTCCTCTTTTGTGAGAGCTTTTATCGTGAATGGGTGTT  
GGATTTTGTAGATGCTTTTTCTGAATCTGCTGATATGATCATGTGATTTTCTTCTCAGCCT  
GTTGAGGTGATGGATTACATGACTAGATTTTCAAATGCTGAACCAGTTTGTGTACCTGAGA  
TAAATCCCACTCGGTT-----

-----  
-----  
-----GTGGTATATA

ATCCTTTTTATGCATTG-TTGGATTTGACTTGCTAATTTTTCATTGAAGATTTTGCACCTATGT  
TTACAAAAGCTATTGGCTTATGGCTTTCCCATCTTGTGTCCTTGTCTGGTTTTGGTTTTAGAG  
TAATGCTGGCTTTATAGAATGAGTTAGAAAACATTCCTTTTGTCTTATTATCTGGAAGACAT  
CATAGAAAATTACTATCATTCTTCTTAAATGTTTGGTAGAATTCATCAGCGAACCCATTCA  
GACCTGGTGCTTCTGTTTGGAAAGGTAGTTATTTATTGATTCAATTCCTTTAATGCATACATAC  
CTATTCAATATTATCTATTCTTCTTGTGTAAGTTTTGGTGGATTGCATCTTTAAGAAATTGATCC  
ATTTCTGCTAGGTTATTAGATTTGTGGGCATAGAGTTGTTATGGTAATAATAGTCTATTATTAC  
CCTTTACAATATTCCTTTAGAATCAGTAGCAGTGG-CCTCTATTTTATTTCTAATGCTAATAATT  
TGTGTCTCATTTCTTTCTTTGTAACTTGGCTAGAGGTTTATCAATTTTCATAGA-----TTTTTTT  
TTTTTAAAGAACCAGCTTTTGGTTTTGTGTA-TTTTCTCTAGTAGGTTTCTGATTTTCAGTTTCA  
TTGATGTCTGCTTTAGTTAATTTTTCTGTCTACTATGTTTTTAATTAG---TTCTTTTCTAGTTT  
CTTGAGGTGGAACTTAGATGATTTGTTTCTAGATCTGTCTTCTTTTCTAAAATGCCTTACTTC  
AATGCCATAAACTTTCTTCTAAACATTGCTTTTGTGTCATCTCACAAATTTTGATAAGTTGTAT

TTTCATTTTTCATTTATTTCAAAATATTGCTTAATTTCTCTGGAGACCTTTTTCTTTGACTGATG  
 TGTATTTAGAAAGTGTGTTGTTTAATCTCCAGGTATTTTTTAATTTTCCAATTGTCTTTCTGTTA  
 TTGATTTCTAGTTTTACTGCATTTCAGAGAGCATATTTTATTTTCCATTCTTTTAAACTTGTTG  
 AGGTGTGTCAGGGCTTAGAATTTGGTCTATCTTGGTGAATGTTCCACGTGAGCTTGAGAAG  
 AATGTATTTTGCTGTTGCTTAACAAAAGATTCTATAGATA-----

--

>Pygathrix\_nemaeus-HERVHF\_3LTR+flanking(+)

TAGAATGTCAGGCCTCTGAGCCCAAGCTAAGCCATCATATCCCCTGTGACCTGCAC-TATACA  
 TCCAGATGGCCTGAAGTAACTGAAGAATCACAAAAGAAGTAAAAATGGTCTGTTCCCTGCCT  
 TAACTGATGACATTACCTTGTGAAATTCCTTCTCCTGGCTCATCCTGGCTCAAAAGCTCCCC  
 CACTGAGCACCTTGTA-CCCCACCCCTGCCAGCCAAAAGACAACCCCTTTGACTGT-AA  
 TTTTCCACTACCTACCGAAATATTATAAAACAGCCCCACCTC-ATCTCCCTTCACTGACTCTC  
 TTTTCGGACTCAGCCCTCCTGCACCCAGGTGAAATAAACAGTCTTGTTGCTCACACAAAGC  
 CTGTTTGGTGGTCTCTTCACACGGACGTGTGCAAACTGACCACTGTGGGCACAAGTCATT  
 AGGACCTTCTGAGGCTGGGTCACAACCGTGTGTCTCAAACCTTGCAAAATAAACTTTCTA  
 AACTAACTGAGACCTGTCTCAGATTTTATGGGTTTCATATTATCAATTAAAAATCAAAATTTAA  
 ATT-AAAAAAAAAAGGAAAGCAGTGTGAGGGGGGCATCCTTACCTTGCTCCTGATCTTAGC  
 AGGGACACTTCAAGTTTCTCACCATTAAAGTGTGACCACTGTGGGCTTTATGTC-AAGT-----  
 --CGGGCTCCTTATCAAGTTTCCCTCTAGTCCTCATTGCTGAGAGCATTATCATGAATGGGT  
 GTTGATTTTGTAGATGCTTTTTCTGAATCTGC---TATGATCATGTGACTTTTCTTCTCAGC  
 CTATTGTGGTGATGGATTACATGACTAGATTTTCAAATGCTGAACCAGTTTGTGTACCTGAG  
 ATAAATCCCCTCTGTT-----

-----  
 -----

-----GTGGTATAT  
 AATTCTTTTTATGCATTGTTTGGATTTGACTTGCTAATTTTTCATTGAAGATTTTGCATCTATA  
 TTTACGAAAGCTATTGGCTTATGGCTTTCCTTCTTGTGTCTTTGTCTGGTTTTGTTTTTAGG  
 GTAACACTGGCTTTATAGAATGAGTCAGAAAACATTCCTTTTGCTTCTATTATCTGGAAGACA  
 TCATAGAAAATTACTATTATTCTTCCTTAAATGTTTGGTAGAATTCATCAGCAAACCCGTTT  
 AGACCTGGTGCTTCTTATTGGAAGGTAATTATTATTGATTCAATTCCTTTAATGCATACATA  
 CCTATTTCATATTATCTATTCTTTCTTGTGTAAGTTTGGTAGATTGCATCTTTAAGAAATTGATC  
 CATTTTCATCTAGGTTATCATATTTCTGGGCGTTGAGTTGTTATGGTAATAATATTCTATTATTAT  
 CCTTTACAATATTCTTTAGGATCAGTAGCAGTGGCCCCCTATTTTATTCTAATGCTAATAAT  
 TTGTGTCTCATTTCTTTCTTTGTTAACTTGCTAGAGGTTTATTAATTTCAATTGC---T-TTTTTT  
 TTTTTCAAAGAACCAGCTTTCGGTTTTGTGATTTTCTCTAGTAGGTTTCTGATTTCCGTTT  
 CATTGATGTCTGCTTTAGTTAAATTTTCTGTCTACTATGTTTTTAATTAGTTCTTCTTTTCTAG  
 TCTCTTGAGGTGGAACTTAGATGATTTATTTCTGATCTTTCTTCTTTTCTAAATGCCTTCTT  
 TCAATGCCATAAACTTTCGGCTAAGCACTGCTTTTGTGTCATCTCACAAATTTGGTAAGTTG  
 TATTTTCATTTTCATTTATTTCAAAATATTGCTTAATTTCTCTGGAGACCTTTTCCTTTGACTGA  
 TGTGTTATTTAGAAAGTGTGTTTAAATCTCCAGGTATTTTTAAATTTTCCAATTGTCTTTCTG  
 TTATTGATTTCTAGTTTTATTGTGTTTCAGAGAGCATATTTTATTTTATAGTTCTTTTAAACCTGT  
 TGAGGTGTGTCGGGGCTTAGAATTTGGTCTGTCTTGGTGAATGTTCCACATGAGCATGAGA  
 AGAATGTATTTTGCTGTTGCTTCACAAAATATT-----

>Rhinopithecus\_roxellana-HERVHF\_5LTR+flanking(-)

--GAATGTCAGGCCTCTGAGCCCGAGCTAAGCCATCATATCCCCTGTGACCTGCACGTGTACA  
TCCAGATGGCCTGAAGTAACTGAAGAATCACAAAAGAAGTGAAAATGGCCTGTTCTGCCT  
TAACTGACAACGTTACCTTGTGAAATTCCTTCTCTTGGCTCATCCTGGCTCAAAAGCTCCCC  
CGCTGAGCACCTTGTA-CCCCACCCCTGCCAGCCAAAAGACAACCCCTTTGACTGT-AA  
TTTTCCACTACCTACCCAAATATTATAAAACAGCCCCACCCC-ATCTCCCTTCACTGACTCTC  
TTTTCGGACTCAGCCCTCCTGCACCCAGGTGAAATAAACAGTCTTGTTGCTCACACAAAGC  
CTGTTTGGTGGTCTCTTCACACGGACGTGTGCAAACTGACCACTGTGGGCACAAGTCATT  
AGGACCTTCTGAGGCTGGGTCAACCGTGTGTCTCAAACCTTGGCAAAATAAACTTTCTA  
AACTAACTGAGACCTGTCTCAGATTTTGGGTTCATATTATCAATTAAAAATCAAAATTTAA  
ATT----AAAAAAGGAAAGCAGTGTGAGGGGGGCATCCTTACCTTGCTCCTGATCTTAGCA  
GGGACACTTCAAGTTTCTACCATTAAGTGTGACCACTGTGGGCTTTATGTC-AAGT-----  
CGGGCTCCTTATCAAGTTTCCCTCTAGTCCTCATTGCTGAGAGCATTATCATGAATGGGTG  
TTGGATTTTGTTAGATGCTTTTCTGAATCTGC---TATGATCATGTGACTTTTCTTCTCAGTCT  
ATTGTGGTGATGGATTACATGACTAGATTTTCAAATGCTGAACCAGTTTGTGTACCTGAGAT  
AAATCCCACTCTGTT-----  
-----  
-----

-----GTGGTATATAA  
TTCTTTTATGCATTGTTTGGATTGACTTGCTAATTTTCGTTGAAGATTTTGCATCTATATT  
TACGAAAGCTATTGGCTTATGGCTTCCCTTCTTGTGTCTTGTCTGGTTTTGTTTTAGGGT  
AACACTGGCTTTATAGAATGAGTCAGAAAACATTCCTTTTGCTTCTATTATCTGGAAGACATC  
ATAGAAAATTACTATCATTTCTTCCTTAAATGTTTGGTAGAATTCATCAGCAAACCTGTTTCA  
ACCTGGTGCTTCCTATTTGGAAGGTAATTATTATTGATTCAATTCCTTTAATGCATGCATACC  
TATTATATTATCTATTCTTTCTTGTGTAAGTTTTGGTAGATTGCATCTTTAAGAAATTGATCCA  
TTTCATCTAGGTTATCATATTTCTGGGCATTGAGTTGTTATGGTAATAATATTCTATTATTATCCT  
TTACAATATTCCTTTAGGATCAGAAGCAGTGG-CCCCTATTTTATTCTAATGCTAATAATTTGT  
GTCTCATTTCTTTCTTTGTTAACTTGGCTAGAGGTTTATCAATTCATTGC-----TTTTTTTT  
CAAAGAACCAGCTTTCGTTTTTGTGATTTTCTCTAGTAGGTTCCCTGATTTCCGTTTCATTG  
ATGTCTGCTTTAGTTAAATTTTCTGTCTACTATGTTTTTAATTAGTTCTTCTTTCTAGTTTCT  
TGAGGTGGAACTTAGATGATTTATTCTGATCTTCTTCTTTCTAAAATGCCTTCTTTCAAT  
GCCATAAACTTTCCGCTACGCACTGCTTTTGTGTCATCTCACAAATTTGGTAAGTTGTATTT  
TCATTTTCATTATTTCAAAATATTGCTTAATTTCTCTGGAGACCTTTTCCTTTGACTGATGTG  
TTATTTAGAAGTGTTTGTTTAATCTCCAGGATTTTAAATTTTCCAATTGTCTTTCTGTTATT  
GATTTCTAGTTTTATTGTGTTTCAAGAGCATATTTTATTTTATAGTTCTTTTAAACCTGTTGAG  
GTGTGCCGGGGCTTAGAATTTGGTCTGTCTTGATGAATGTTCCACATGAGCATGAGAAGAAT  
GTATTTTGCTGTTGCTTCACAAAATATTCTATAGA-----

>Rhinopithecus\_strykeri-HERVHF\_3LTR+flanking(+)

-----GCACGTGTACATCCAGATGGCCTGAAGTAACTGAA  
GAATCACAAAAGAAGTGAAAATGGCCTGTTCTGCCTTAACTGACGACATTACCTTGTGAA  
ATTCTTCTCTTGGCTCATCCTGGCTCAAAAGCTCCCCCGCTGAGCACCTTGTA-CCCCCA  
CCCCTGCCAGCCAAAAGACAACCCCTTTGACTGT-AATTTTCCACTACCTACCCAAATATTA  
TAAAACAGCCCCACCCC-ATCTCCCTTCACTGACTCTCTTTTCGGACTCAGCCCTCCTGCAC  
CCAGGTGAAATAAACAGTCTTGTTGCTCACACAAAGCCTGTTTGGTGGTCTCTTCACACGG  
ATGTGTGCAAACTGACCACTGTGGGCACAAGTCATTAGGACCTTCTGAGGCTGGGTCA

ACCGTGTGTCCTCAAACCTGGCAAAATAAACTTTCTAAACTAACTGAGACCTGTCTCAGATT  
 TTGAGGGTTCATATTATCAATTAATAATCAAAATTTAAATT---AAAAAAGGAAAGCAGTGT  
 TGAGGGGGGCATCCTTACCTTGCTCCTGATCTTAGCAGGGACACTTCAAGTTTCTCACCATT  
 AAGTGTGACCACTGTGGGCTTTATGTC-AAGT-----CGGGCTCCTTATCAAGTTCCCTCT  
 AGTCCTCATTTGCTGAGAGCATTATCATGAATGGGTGTTGGATTTTGTAGATGCTTTTTCT  
 GAATCTGC---TATGATCATGTGACTTTTCTTCTCAGTCTATTGTGGTGATGGATTACATGACT  
 AGATTTTCAAATGCTGAACCAGTTTTGTGTACCTGAGATAAATCCCACTCTGTT-----

-----GTGGTATATAATTCTTTTTATGCATTGTTTGGATT  
 TGAATTGCTAATTTTCGTTGAAGATTTTGCATCTATATTTACGAAAGCTATTGGCTTATGGC  
 TTTCCCTTCTGTGTCTTTGTCTGGTTTTGTTTTTAGGGTAACACTGGCTTTATAGAATGAGT  
 CAGAAAACATTCCTTTTGTCTTATTATCTGGAAGACATCATAGAAAATTACTATCATTCTT  
 CCTTAAATGTTTGGTAGAATTCATCAGCAAACCCGTTGAGACCTGGTGCTTCCTATTTGGAA  
 GGTAATTATTTATTGATTCAATTCCTTTAATGCATGCATACCTATTCATATTATCTATTCTTTCTT  
 GTGTAAGTTTTGGTAGATTGCATCTTTAAGAAATTGATCCATTTTCATCTAGGTTATCATATTTT  
 TGGGCATTGAGTTGTTATGGTAATAATTTCTATTATTATCCTTTACAATATTCCTTTAGGATCA  
 GAAGCAGTGG-CCCCTATTTTATTTCTAATGCTAATAATTTGTGTCTCATTTCTTTCTTTGTAA  
 CTTGGCTAGAGGTTTATCAATTTCAATTGC-----TTTTTTTTTCAAAGAACCAGCTTTCGTTTT  
 TGTGATTTTTCTCTAGTAGGTTCTGATTTCCGTTTCATTGATGTCTGCTTTAGTTAAATTTT  
 TCTGTCTACTATGTTTTTAATTAGTTCTTCTTTCTAGTTTCTTGAGGTGGAACTTAGATGAT  
 TTAATTTCTGATCTTTCTTCTTTCTAAAATGCCTTCTTTCAATGCCATAAACTTTCCGCTAAGC  
 GCTGCTTTTGTGTCATCTCACAAATTTTGGTAAGTTGTATTTTCATTTTCATTATTTCAAAT  
 ATTGCTTAATTTCTCTGGAGACCTTTTCCTTTGACTGATGTGTTATTTAGAAGTGTTTTGTTTA  
 ATCTCCAGGTATTTTAAATTTTCCAATTGCTTTCTGTTATTGATTTCTAGTTTTATTGTGTTT  
 AGAGAGCATATTTTATTTTATGTTCTTTTAAACCTGTTGAGGTGTGTCGGGGCTTAGAATTT  
 GGTCTGTCTTGGTGAATGTTCCACATGAGCATGAGAAGAATGTATTTTGCTGTTGCTTCACA  
 AAATATTCTATAGATATCCAGTAAATCAGCCGAATGACAGCGCTGTTCTGTTCAATTATGTCC  
 T

>Theropithecus\_gelada-HERVHF\_5LTR+flanking(-)

--GAATGTCAGGCCTCTGAGCCCAAGCTAAGCCATCATATCCCCTGTGACCTGCAC-TATACAT  
 CCAGATGGCCTGAAGTAACTGAAGAATCACAAAAGAAGTGAAAGTGGCCTGTTCTGCCTT  
 AACTGATGACATTAATTTGTGAAATTCCTTCTCCTGGCTCATCCTGGCTCAAAAGCTCCCC  
 ACTGAGCACCTTGTGA-CCCCACCCCTGCCAGCCAAAA-ATAACCCCTTTGACTGT-AATT  
 TTCCACTACCTACCCAAATCCTATAAAACGACCCACCCCTATCTCCCTTCACTGACTCTCTT  
 TTCGGACTIONAGCCCGCTGCACCCAGATGAAATAAACAGTCTTGTTGCTCACACAAAGCCT  
 GTTTGGTGGTCTCTTCACATGGACGTGCGTGAAACTGACCACTGTGGGCACATGTCATCAG  
 GTCCTTCTGAGGCTGGGTCACAGCCGTGTGTCCTCAAACCTGGCAAAATAAACTTTCTAAA  
 TTAACATAAGACTTGTCTCAGATTTTCGGGGTTCATATTATCAATTAATAAATAAAATTTAAAT  
 T-TAAAAAAGAGGAAAGCAGTGTGAGGGGGGCATCCTTACCTTGCTCCTGATCTTAGCA  
 GGGAAGCTTCAAGTTTCTCACCATTAAAGTGTGACCACTGTTGGCTTTTTGTG-GAGTTTTGA  
 CAGCTGCAGGCTCCTTATCAAGTTCCCTCTAGTCCTCATTTGCTGAGAGCGTTTATCATGAA  
 TGGGTGTTGGATTTTGTAGATGATTTTCTGAATCTGC---TATGATCATGTGACTTTTCTTCT



TTAGCCTGTTGAGGTGACGGATTACATGACTAGATTTTCAAATGCTGAACCAGTTTTGTGTA  
 CCTGAGATAAATCCCACTCTGTT-----  
 -----  
 -----GT  
 GGTATATAATTCTTTTTATGCATTGTTTGGATTTGACTTGCTAATTTTCGTTGAAGACTTTTG  
 CATCTATGTTTATGAAAGCTATTGGCTTATGGCTTTCCTTCTTGTGTCTTTGTCTCGTTTTGT  
 TTTTAGGGTAATGCTGGCTTTATAGAATGCGTTAGAAAACATTCCTTTTGCTTCTATTATCTGG  
 AAGACATCATAGAAAATTACTATCGTTTCTTCCTTAAATGTTTGGCAGAATTCATCAGCAAAC  
 CCGTTCAGACCTGGTGCTTCCTATTTGGAAGGTAATTATTTATTGATTCAATTCCTTTAATGCA  
 TACATACCTATTCATATTATCTATTCTTTCTTGTGTAAGTTTGGTAGATTGCATCTTTAAGAAA  
 TTGATCCATTTTCATCTAGGTTATCATATTTCTGGGCATAGAGTTGTTATGGTAATAATATTCTAT  
 TATTATCCTTTACAATATTCCTCTAGGATCAGTAGCAGTGG-CCCCATTTTATTTCTAATGCTA  
 ATAATTTGTGTCTCATTTCTTTCTTTGTAACTTGGCTAGAGGTTTATCAATTTTCATTCC-----  
 TTTTTTTTTCAAAGAACCAGCTCTTGGTT---TTGATTTTCTCTAGTAGGTTCCCTGATTTTCAGT  
 TTCCTGATGTCTGCTTTAGTTAATTTTTCTGTCTACTATGTTTTTAATTAGTTCTTCTTTTCT  
 AGTTTCTTGAGGTGGAACTTAGATGATTGTTTCTGATCTTCTTCTTTTCTAAAATGCCTT  
 CTTTCAATGCCATAAACTTTCCTCTAAGCACTGCTTTTGTTGCATCTCACAAATTTTGATAAG  
 TTGATTTTTCATTTTCATTTATTTCAAAATATTGCTTAATTTCTCTGGAGACCTTTTCCTTTGAC  
 TGATGTGTTATTTAGAAGTGTTTTGTTAATCTCCAGGTATTTTTTAATTTCCAATTGTCTTT  
 CTCTTATTGATTTCTAGTTTTATTGTGTTTCAGAGAGCATATTTTATTTTTTAGTTCTTTTAACT  
 TGTTGAGGTGTGTCAGGGCTTAGAATCTGGTCTGTCTTGGTGAATGTTCCACATAAGCATGA  
 GAAGAATGTATTTTGCTGTTGCTTCATGAAAT-----

## Supplementary data S6 The alignments of the internal sequences of a widely vertical transmitted

### HERV-H in 17 species

>Cercopithecus\_atrys-HERVHF\_INT(-)

-----GCTAGTGAAATTTGGTGCCGTGACTCAGACTGG  
GGGACCTCCCTTGGGAGATCAATCCCCTGTCCTCCTGCTCTTTGCTCCGTGAGAAAGATCCA  
CTTACGACCTCAGGTCTCAGACCAACCAGCCCCAAGAACATCTCACCAATTTTAAATCGG  
GTAAGCAGCCTCTCTTTACTCTCTTCCCCAACTTCTCTCACTATCCCTCAACCTCTTTCTCCT  
TTCAATCTTGGTGCCACACTTCAATCTCTCCCTTCTCTTAATTTTCAGTTCCTTTCTTTTCTG  
TAGAGACAGAGGAGACGCGTTTTATCCGTGAACCCAAAACCTCCTGCACCGGTACCGACTC  
GGGAAGACAGTCTTCCCTTGGTGTTAATCCCTGCAGGGACGTCTGCCTGATTATTCACCCA  
CATTTTCATTGGTGTCTGATCACCACAGGGATGCCTGCCTTCGTCATTACCCACAATCCCTC  
GGTGGCAAGTCCATTGCAGGGACACCTGCTTTGGCTGCTCACCCACATTGCAGCCCAGGGC  
TGCTCACCCAC-----CCCTTCTCTCCGTGTCT  
CTACCCTCTCTTCTCTCCA-----CTTTCTTGGGGGGCTAGCACCCCC  
CACCC-----CTTCTCTCTGTGTCTCTACCC-----TCTCT  
TTTCTCTGCACTTGCCTCCTTCATTATGGGCAAACCTCCACACCCTCCATTCCCTCTTCT  
CCCTTAGCCTGTGTTCTCAAGAACTTAAAACCTCTTCAACTCACAACCTGACCTAAAACCTA  
AATGCCTTATTTTCTTCTGCAACACGGCTTGGCCCCAAAATACAAACTCGAC-AATGGTTCC  
AAATAGCCAGAAAACGGCACTTTTCGATTTCTCCATCCTACAAGATCTAGATAATTCTCATCAT  
AAAATGGGCAAATAGTCTGAGGTGCCTGATGTCCAGGCATTCTTTACACATGAGTCCCTCC  
CTGGTCTCTGTTCCCAATGCAACTCGTCCC-----AAATCTTCC  
TTCTTTCCCTCACGCCTGTCCCTCAGTCCCAACCCCAAGCGTTGCTGAGTCTTTCCAAAGT  
CTTCCTTTTTTACGGACCCATCTGACCTCTCCCTCCTCCCCAGGCTGCTCCTCACCAGGCT  
GAGCCAGGTCCCAA-TTCTTCCTCAGCCTCCGTTCCCCCACCCTATAATCCTTTTATCAGCTC  
CCCTCCTCACACCCAGTCCGACTTGCAGTTTCGTTTTCGAACTAGCCCTCCCTCACCTGCCC  
AGCAATTATCTCTTAAAAATGTGG-----CTGGAGCCGAAGGCATAGTCAGGGTTAATGCTCC  
TTTTTCTTTATCTGGCCTCTCCCAAATCAGTTAGCGTTTAGGCTCTTTTTTCATCAAATATAAAA  
TCCCGGCCAGTTCATGGCTTGTGGCAGCAACCCTGAGATGCTTTACTGCCCTAGACCCT  
GAAAGGTCAAAGGCCGTCTTATTCTCAATATACAT--TGTATTACCAATCCACTCCTGACA  
TTAAATAAAACACCAAAAATTAAGTTCCGGCCCTCAAACCCCAACAAGACTTAATTAAC  
CTTGCCTTCAAGGTGTACAATAATAGAGAAGAGTTGCAATTACTTGCCTCCGCTGTGAGAG  
AAACCCAGCCACATCTTCAGCACACAAGAACTTCAAAATGCCTAAGCCACAGCAGCCAG  
GCGTTCCTTCGGGACTTTCTCCCCCAGGATCTTGCTTCAAGTGCTGGAAATCTGGCCACTGG  
GCCAAGGAATGACCGTAGCCAGAAATTCC-TCCTAAACTGTGTCCCATCTGTGCAGGACCCC  
ACTGGAAATTGGACTGTCCAACCTGGCCCAAGGCTCTAACTGACTCCTTCCCAGATCTTCTC  
AGCTTA--GGCTGAAGACTGATGCTGCCCGATCGCCTTGGAAGCTTCCTGGACCATCCAGA  
CGCTTTGGGTAACTCTTACAGTGGAGGGTAAGTCCATCCCCTTCTTAATCAATATGGAGGCT  
ACCCACTCCACATTACCTTCTTTTCAAGGGCCTGTTTCCCTTGCCTCCATAAATGTTGTGGGC  
ATTGACAGCCAGGTTTCTAAACCCCTTAAACTCCCCAGTCTGGTGCTAACTTGGACAAC  
ATTCTTTTGTGCACTCTTTTTCAGTTATCCCCACCTGCCAGTTCCTTATTAGGCCGAGATAT  
TTTAACCAAATTGTCTGCTTCCCTGACTATTCTGGACTACAGCCACATCTCATTGCTACCT  
GCTTCCCAACCCAAAGCCTCCTTTGCACCTTCTCTCGTATTCCCCGAACCTAATCCACATGT

ATGGGACACCTCTA---CTCCCTCCCTGGCAACCAATCACCAGCCTATTACTATCCCATTA  
CCTAATCACCCCTTACCCCATTCATGCCAGTATCCCATCCCACAACAGGCTTTAAAGGGATT  
GAAACCTGTTATCACTTGCCTGCTACAGTATGGGCTTCTAAAACCTGTAAACTCCCTTATAA  
TTCCCCCATTTTACCTGTCCAAAACTGGACAAGTCTTACAGGTTACTTCAGGATCTGTGCC  
TTATCAACCAAATTGTTTTGCCTAT---CCTTGTGGTGCGACACCCATTTACTCTCCTATCCTCA  
ATACCTCCCTGCACAACCCATTATTCTGTTCTGGGTCTCAAACATGCTTTCTTTACTATTCTT  
TGCATCCTTCATCCCAGCCTCTTTTCGCTTTCACTTGGACTGACCCTGACACCCATCAGGCT  
CAGGAAATTACTTGGGCTGTACTGCTGCAAGGCTTCACGGACAGCCCCTATTACTTCAGTCA  
AGCCCAAATTTCTTCCTCATCTGTTACCTATCTTGGCATAATTC-TCATAAAAAACACAC--GTG  
CTCTCCCTGCTGATCGTGTCTGGCTAATCTCCCAAACCCCAACCCCTTCTACAAAACAACAA  
CTCCTTCCTTC-GTAGGCATGGTTAGCTACTTCCACCTTTGGATACCTAGTTTTTACCATCTTGA  
CTAAACCACGATGTAAACTCACAAAAGGAAACCTAGCTGACCCACAGATCCTAAATCCTT  
TTGCCACTCCTTTCCATTTCCTTAAAAACAGCCCTAGAAGCTACTCCACACTAGCTCTCCCT  
AACTCATCCCAATCCTTTTTTTCATTACACACAGTCCAAGTGCAGGGCTGTGAGGTCAAAATT  
CTTACACAAGGATCGGGACCATGCCCTGTGGCCTTTTTATCCAAACAACCTTGACCTTACTCT  
TTTAGCTTAG-CCTCATGTCTGTGTGTGGCAGCTGCTGCTTCCTTAATACTTTTACAGAGGCCCT  
CAAAATCACAAACTATGCTCAAC-----TCACTCTCTAGAGTTCTCATAACTTCCAAAATCTA  
TTTTCTTCCTCACACCTGATGCACATATTTCCTGCC---CCCCTCCACTACCTCTCAACAAGCC  
AAACTCATTGCCTTAACTCAAGCCCTCGCTCTTGCAAAAGGATTAAGTGTCAATATTTATACT  
GACTCTAAATATGCCTTCCATATCCTGCACCACCATGCTGTTATATGGGCAGAAAGAAATGTC  
CTAACTATGCAAGGGTCTCCATCATTAATGCCTCTTTAATAAAAACTCTTCTCAAAGCTGCT  
TTACTTCCAAAGGAAGCTGGAATCATTCACTGCAAGGACCATCAAAGGCATCAGATCCCA  
TTGCTCAGGACAATGCTTATGCTGATACGGTAGCTAAA-AAGCAGCTAGCATTCCAACTTCTA  
TCCCTCACGGCAGTTTTTCTCCTTCTCATTTGGCCACTCCCACCTACTCCCCACTGAAACT  
TCCACCTATCAGTCTCTTCCCACGCAAGGCAAATGGTTCCTTGGACCAAGGAAAATATCTCCT  
TCCAGCCTCACAGGCCCATTCTGTTCTGTCATATTCATAACCTCTTCCATGTAGGTTACAA  
GCTGCTAGCCCAACTCTTAGAACCTCTCATTTTCCTTTCCATCGTGGAGATCTATCCTCAAGG  
AAATCACTTCTCAG-TGTTCCATCTGCTATTCTACTACTCCTCAGGGATTGTTTACGGCCCCCT  
CCCTTCACTACACATCAAGCTTGGTGATTTGCCCCTGCCAGGACTGGCAAATTGACTTTAC  
TCACATGCCCCGAGTCAGGAAACTAAAATACCTCTTGGTCTAGGTAGACACTTTCAGTGGAT  
GGGTAGAGGCCTTTCCACAGGGTCTGCGAAGGCCACCATGGTCATTTCTTCCCTTCTGTC  
AGGTATAATTCTCGGTTTGACCTTCCTACCTCTATACAGTCCAATAATGGACCAGCCTTTGT  
TAGTTAAATCACCCAACCAGTTTCTCAGGCTCTTAG---TATTAGTGGAACCTTTCATACCCCT  
TACTATCCTCAGTCTTCAGGAAAGGTA-----GAACGGGCTAATGGTCTTTTAAAAACACA  
CACTCAGGCTCAGCCACCAACTTAAAAAGGACTAGACAATACTTTTACTACTTTCCCTTCTCA  
AAATTCGGGCCTGCCCTCGGGATGCTACAGGGTACAGCCCATTAGAGCTTCTGTATGAACCC  
TCCTATTTATTAGGCCCCAGTCTTATTCCAGACACCAGCCCAACTTGGACTGTGCCCCAAAA  
ACTTGTATCCCTACTGTCTTCTGTCTAGTCATACTCCTATTACCGTTCTCAAATACTCATAA  
ATGCCCTGCTCTTGTTTACACTGCCGTTTACACTGTTTCTCCAAGCCATCACAGCTGATATC  
TCCTGGTGCTAT-CCCAAACCTGCCACTCTTAACTCCCTCTTAAAGTAAATAAATAATCTTTGCT  
GGCAAGGCTATGCTGAACCTCCTTGGGCACTCTCTAATTGGATGTCCTGGATCCTCCCAATT  
CTTAGTCCTTTAATACTGTTTTTCTCCTTCTTATTACAGACCTTTT-GTCTTCCGTTTAGTTT  
TTCAATTCATACAAAACCTGCTTCCAGGCCATCACCAATCATTCTATATGATAAATGCTCCTTCT  
AACAACCCACAAATATCACCCCTTACCACAAAATCTTCTTTCAGCTTAATCTCTCCCACTCT

GGGTTTCCATGCCACCCCTAATCCTGCATGAAGCAGCCCTGAGAAACATCACCCATTATCTC  
TCCATGCCACCCCCCAAAAAATTTTGC-TGCCCCAACACTTCAATACTATTTTGTGTTATTTT  
TCTTATTAATATAAGAAGGCAGGAATGTCAGGCCT-----

>Cercopithecus\_mitis-HERVHF\_INT(-)

-----AGGGGGACCTCTCTTGGG  
AGATCACTCCCCGTGCTCCTGCTCTTTGCTCCATGAGAAAGATCCACCTACGACCTCAGGT  
CCTCAGACCAACCAGCCCCAAGAACATCTCACCAATTTTAAATCGGGTAAGCAGCCTCTCT  
TACTCTCTTCTCCAACCTCTCTCACTATCCCTCAACCTCTTTCTCCTTTCAATCCTGGTGCC  
ACACTTCAATCTCTCCCTTCTCTTAATTTAGCTCCTTTCCTTTTCTGGTAGAGACAGAGGA  
GACGCGTTTTATCCGTGAACCCAAAACTCCGGCACCGGTCACCGACTCGGGAAGACAGTC  
TTCCTTTGGTGTTTAAATCCCTGCAGGGACGCTGCCTGATTATTCACCCACATTTCATTGGTG  
TCTGATCACCGCAGGGACGCCTGCCTTGGTCATTACCCACAATCCCTTGGTGGCAAGTCC  
ATTGCAGGGACGCCTGCTTGGCTGCTCACCCACATTGCAGCCTAGGGCTGCTCACCCAC  
CCCTTCTCTCAGTGTCTCTACCTCTCTTCTCTGCCACTTTCTTGGGGGGCTGGCACCCCC  
CACGCCCTTCTCTCCGTGTCTCTATCCTCTCTTCTCTCCA-----CTTT  
CTTGGGGGGCTGGCACCCCCACCC-----CTTCTCTCCGTGTCTCTACCTCTCTTCTCTG  
CACTTCTTGGGGGGCTGGCACCCCCACCCCTTCTCTCTGTGTCTCTTTTCTCTGGACTTG  
CCTCCTTCACTATGGGCAAACTTC--CACCTCCATTTCTCCTTCTTCTCCCTTAGCCTGTGTT  
CTCAAGAACTTAAACCTCTTCAACTTACACCTGACCTAAACCTTAATGCCTTATCTTCTT  
CTGCAATGCCGCTTAACCC--AATACAACTCGAC-AATGGTTCCA-----GAAAACGGCACT  
TTCGATTTCTCCATCTACAAGATCTAGATAATTCTTGTCAATAAATGGGCAATAGTCTGAG  
GTGCCTGATGTCCAGGCATTCTTTACATATGGGTCCCTCCCTGGTCTCTGTTCCCAATGCAA  
CTCGTCCC-----AAATCTTCCTTCTTTCCCTCCCGCCTGTCCC  
CTCAGTCCCAACCCCAAGAGTTGCTGAGTCTTTCTAA--TCTTCCTTTTTTACGGACCCAACT  
GACCTCTCCCCCTCCTCCCCAGGCTGCTCCTCGCCAGGCCAAGCCAGGTCCCAA-TTCTTCCT  
CAGCCTCCGTCTCCCCACCTATAATCCTTTTATCACCTCCCCTCCTCACACCCAGTCCGACT  
TGCAGTTTCGTTTTGCAACTAGCCCTCCCCACCTGCCAGCAATGATCTCTTAAAAATGTG  
G-----CTGGAGCTGAAGGCATAGTCAGGGTTAATGCTCCTTTTTCTTTATCTGGCCTCTCCCA  
AATCAGTTAGCGTTTAGGCTCTTTTTCATCAAATATAAAAACCCGGCCCAGTTCATGGCTTGT  
TTGGCAGCAACCCTGAGATGCTTTACTGCCCTAGACCCTGAAAGGTCAAAGGCTGTCTTA  
TTCTCAATATACAT---TGTATTACCAATCCACTCCTGACATTAAGTAAAACACCAAAAATTA  
GTTCCGGCCCTCAAACCTCCACAACAAGACTTAATTAACCTTGCCTTGAAGGTGTACAATAAT  
AGAGAAGAGTTGCAATTACTTGCTCCACTGTGAGAGAAACCCAGCCACATCTTCAGCAT  
ACAAGAACTTCAAAATGCCTAAGCCACAGCAGCCAGGCGTTCCTTCAGGACTGTCTCCCC  
AGGATCTTGCTTCAAGTGCTGGAAATCTGGCCACTGGGCCAAGGAATGCCCGTAGCCAGG  
ATTCTTCCTAAACTGTGTCCCATCTGTGCAGGACCCCACTGGAAATTGGACTGTCCAACCTG  
GCCAAGGCTCTGACTGACTCCTTCCCAGATCTTCTCAGCTTA--GGCTGAAGACTGACGCT  
GCCCGATTGCCTTGGAAGCTTCCTGGACCATCCAGACGCTTTGGGTAACCTTTACAGTGG  
AGGGTAAGTCCGTCCCCTTCTTAATCAATATGGAGGCTACCCACTCCACATTACCTTCTTTTC  
AAGGGTCTGTTTCCCTTGCTCCATAACTGTTGTGGGCATTGACAGCCAGGTTTCTAAACCC  
CTTATAACTCCCCTACTCTGGTGCTAACTTGGACAATATTCTTTTATGCACTCTTTTTTAGTTC  
TCCCCACCTGCCAGTTCCTTATTAGGCCAAGATATTTTAACCAAATTGTCTGCTTCCCTGA  
CTCTTCCTGGACTACAGCCACATCTAATTGCTACCTGCTCCCCAACCCAAAGCCTCCTTCG  
GCCTTCCTCTCGTATTCGCCGAACCTTAACCCACGTGTATGGGACACCTCTA---CTCCCTCCC

TGGCAACCAATCACCAGCCTATTACTATCCCATTTAAAACCTAATCACCCCTTACCCCATTTCAAT  
GCCAGTATCCCATCCCACAACAGGCTTTAAAGGGATTGAAACCTGTTATCACTCGCCTGCTA  
CAGCATGGGCTTCTAAAACCTGTAAACTCCCCTTACAATCCCCCATTTTACCTGTCCAAAA  
ACTGGACAAGTCTTACAGGTTACTTCAGGATCTGTGCCTTATCAACCAAATTGTTTTGCCTAT  
CCACCTTGTGGTGCAAAACCCATTTACTCTCCTATCCTCAATACCTCCCTCCACAACCCAGTA  
TTCTGTTCTGGGTCTCAAACATGCTTTCTTTACTATTCCCTTTGCATCCTTCATCCCAGCCTCTT  
TTCGCTTTCACCTTGGACTGACCCTGACACCCATCAGGCTCAGGAAATTAC-TGGGCTGTACT  
GCTGCAAGGCTTCACGGACAGCCCCTATTACTTCAGTCAAGCCCAAATTTCTTCCTCATCTG  
TTACCTATCTTGGCATAATTC-TCATAAAAACACACATGTGCTCTCCCTGCTGATCATGTCTGG  
CTAATCTCCCAAACCCCAACCGCTTCTACAAAACAACAACCTCCTTCCTTCAGTAGGCATGGT  
TAGCTACTTCCACCTTTGGATACCTAGTTTTACCATCTGACTAAACCACGATGTAAACTCAC  
AAAAGGAAACCTAGCTGACCCACAGATCCTAAATCCTTTTGCCACTCCTTTCCATTCTTA  
AAAACAGCCCTAGAAGCTGCTCCCACACTAGCTCTCCCTAACTCATCCCAACCC-TTTTTCA  
TTACACACAGTCAAAGTGTAGGGCTGTGAGGTCAAAATTCTTACACAAGGATCGGGACCAT  
GCCCTGTGGCCTTTTTATCCAAACAACCTTGACCTTACTGTTTTAGCTTAG-CCTCATGTCTGT  
GTGTGGCAGCTGCTGCTTCCTTAATACTTTTCAGAGGCCCTCAAAATCACAAACTATGCTCAA  
C-----TCACTCTCTAGAGTTCTCATAACTTCCAAAATCTATTTTCTTCCTCACACCTGATGC  
ACATATTTCTGGC---CCCTCCACTACCTCTCAACAAGCCAAACTCATTGCCTTAACTCAAG  
CCCTCGCCCTTGCAAAGGATTAAGTGTCAATATTTATACTGACTCTAAATATGCCTTCCATA  
TCCTGCACCACCATGCTGTTATACGGGCTGAAAGAAATGTCTAACTATGCAAGGGTCTCTCC  
ATCATTAATGCCTCTTTAATAAAAACCTCTTCTCAAAGCTGCTTTACTTCCAAAGGAAGCTGG  
AATCATTCACTGCAAGGGCCATCAAAGGCATCAGATCCCATTGCTCAGGACCATGCTTATG  
CTGATACGGTAGCTAAA-AAGCAGCTAGCATTCCAACCTTCTATCCCTCACGGCAGTTTTTCTC  
CTTCTTATTTGGCCACTCCACCTACTCCCCCGCAGAACTTCCACCTATCAATCTCTTCCCA  
CGCAAGGCAAATGGTTCTTGGACCAAGGAAAATATCTCCTTCCAGCCTCACAGGCCCATTC  
TATTCTGTCATATTTATAACCTCTTCCATGTAGGTTACAAGCCGCTAGCCCATCTCTTAGA  
ACCTCTCATTTCTTTCCATCGTGGAGATCTATCCTCAAGGAAATCACTTCTCAG-TGTTCCA  
TCTGCTATTCTACTATTCCTCAGGGATTGTTCAAGCCCCCTCCCTTCCCTACACATCAAGCTT  
CGGGATTTGCCCCTGCCCAGGACTGACAACTGACTTTACTCACATGCCCTGAGTCAGGAA  
ACTAAAATACCTCTTGGTCTAGATAGACACTTTCAGTGGATGGGTAGAGGCCTTTCCCACAG  
GGTCTGCGAAGGCCACCGCGGTCAATTTCTTCCCTTCTGTCAGGTATAATTCCTCAGTTTGAC  
CTTCTACCTCTATACAGTCCAATAATGGACCAGCCTTTGTTAGTTAAATCACCCAACCAAGTT  
TCTCAGGCTCTTAG---TGTTCAAGTGGAACCTTTCATACCCCTTACCATCCTCAATCTTCAGGAA  
AGGTA-----GAACGGGCTAATGGTCTTTTAAAAACACACCTCACCAATCTCAGCCACCAACTT  
AAACAGGACTAGACAATACTTTAACCACCTTCCATTCTCAAAATTCGGGCCTGTCCTCGGGA  
TGCTACAGGGTACAACCCCTTTGAGCTTCTGTATGAACCCTCCTATTTATTAGGCCCCAGTCT  
TATTCCAGACACCAGCCCAACTTGGACTGTGCCCCAAAACTTGTATCCCTACTCTCTTCT  
GTCTAGTCATACTCCTATTCACCGTTCTCAAATACTCATAAATGCCCTGCTCTTGTTTACACT  
GCCGTTTACACTGTTTCTCCAAGCCATCACAGCTGATATCTCCTGGTGCTAT-CCCAAACCTG  
CCACTCTTAACTCCCTCTTAAAGTAAATAAATAATCTTTGCTGGCAGGGCTATGCTGAACCTC  
CTTGGACACTCTCTAATTGGATGTCCTGGATCCTCCCAATTCTTAGTCCTTTAATACCGTTT  
TTCTCCTTCTCTTATTCAGACCTTTT-GTCTTCCGTTTAGTTTTTCAGTTCATACAAAACCTGCT  
TCCAGGCCATCACCAATCATCTATATGATAAATGCTCCTTCTAACAACCCCAATATCACC  
CCTTACCACAAAATCTTCCTTCAGCTTAATCTCTCCACTCTGGGTTTCCACGCCACCC-AA

TCCTGCATGAAGCAGCCCTGAGAAACATCACCCATTATCTCTCCATGCCTCCCCCAAAAAA  
TTTTTGCAGGCCCCAACACTTCAATACTATATTGTATTATTTTCT--TTAATATAAGAAGGCAG

>Cercopithecus\_mona-HERVHF\_INT(-)

-----GCTAGTGAAATTTGGTGCCGTGACTCAGATCGG  
GGGACCTCTCTTGGGAGATCACTCCCCTGTCTCTCTTTGCTGCGTGAGAAAGATCC  
ACCTACGACCTCAGGTCCTCAGACCAACCGGCCCAAGAACATCTCACCAATTTTAAATCG  
GGTAAGCAGCCTCTCTTTACTCTCTTCTCCAACCTCTCTCACTATCCCTCAACCTCTTTCTCC  
TTTCAATCCTGGTGCCACACTTCAATCTCTCCCTTCTCTTAATTTAGCTCCTTTCTTTCTG  
GTAGAGACAGAGGAGACGCGTTTTATCTGTGAACCCAAACTCCGGCACCGGTACCGAC  
TCGGGAAGACAGTCTTCCTTTGGTGTTAAATCCTGCAGGGACGTCTGCCTGATTATTCACC  
CACATTTCAATTGGTGTCTGATCACCGCAGGGACGCCTGCCTTGGTCATTCACCCACAATCCC  
TTGGTGGCAAGTCCATTGCAGGGACGCCTGCTTTGGCTGCTCACCCACATTGCAGGCCAGG  
GCTGCTCACCCAC-----CCCTTCTCTCCGTGT  
CTCTACCCTCTCTTCTCTGCA-----CTTTCTTGGGGGGCTAGCACCC  
CCCACCC-----CTTCTCTCTGTG-----TCTCTTT  
TCTCTGGACTTGCCCTCCTTCACTATGGGCAAACTTC--CACCTCCATTTCTCCTTCTTCTCCC  
TTAGCCTGTGTTCTCAAGAACTTAAACCTCTTCAACTCACACCTGACCTAAAACCTTAATG  
CCTTATCTTCTTCTGCAATGCCGCTTAACCCC--AATACAAA-TTGAC-AATGGTTCCAAATAGC  
CAGAAAACGGCACTTTCGATTTCTCCATCCTACAAGATCTAGATAATTCTCGTCATAAAATG  
GGCAAATAGTCTGAGGTGCCTGATGTCCAGGCATTCTTTTACACATGGGTCCCTCCCTGGTC  
TCTGTTCCCAATGCAACTCGTCCC-----AAATCTTCCTTCTTT  
CCCTCCCGCCTGTCCCCTAAGTCCCAACCCCAAGAGTTGCTGAGTCTTTCTAA--TCTTCTTT  
TTTTACGGACCCATCTGACCTCTCCCCTGCTCCGCAGGCTGCTCCTCGCCAGGCCAAGCCA  
GGTCCCAA-TTCTTCCTCAGCCTCCGTTCCCCCACCCTATAATCCTTTTATCACCTCACCTCCT  
CACATCCAGTCTGACTTGCAGTTTCGTTTTGCAACTAGCCCTCCCCACCTGCCAGCAATT  
ATCTCTTTAAATGTGG-----CTGGAGCTGAAGGCATAGTCAGCGTTAATGCTCCTTTTTCTT  
TATCTGGCCTCTCCCAAATCGGTTAGCGTTAGGCTCTTTTTTCATCAAATATAAAAACCCGGC  
CCAGTTCATGGCTTGTTTGGCAGCAACCCTGAGATGCTTTACTGCCCTAGACCCTGAAAGG  
TCAAAAGGCCGTCTTATTCTCAATATACAT---TGTATTACCCAATCCACTCCTGACATTAAATA  
AAACACCAAAAATTAAGTTCCGGCCCTCAAACCCCAACAACAAGACTTAATTAACCTTGCCT  
TGAAGGTGTACAATAATAGAGAAGAGTTGCAATTACTTGCCTCCGCTGTGA--GAAACCCCA  
GCCACATCTTCAGCACACAAGAACTTCAAAATGCCTAAGCCACAGCAGCCAGGCGTTCCTT  
CAGGACTTTTCCCCCAGGATCTTGCTTCAAGTGCTGGAATCTGGCCACTGGGCCAAGGA  
ATGCCCGTAGCCCAGGATTCC-TCCTAAACTGTGTCCCATTTGTGCAGGACCCCACTGGAAA  
TTGGACTGTCCAACCTGGCCCAAGGCTCTGACTGACTCCTTCCCAGATCTTCTCAGCTTA--G  
GCTGAAGACTGACGCTGCCCGATTGCCTTGGAAGCTTCCCTGGACCATCCCAGACGCTTTGG  
GTAACCTTTACAGTGGAGAGTAAGTCCGTCCCCCTTCTTAATCAATATGGAGGCTACCCACTT  
CACATTACCTTCTTTTCAAGGGTCTGTTTCCCTTGCCTCCATAACTGTTGTGGGCATTGACAG  
CCAGGTTTCTAAACCCCTTATAACTCCCCCACTCTGGTGCTAACTTGGACAATATTCTTTTAT  
GCACTCTTTTTTAGTTCTCCCCACCTGCCCAGTTCCCTTATTAGGCCAAGATATTTAAACCAA  
ATTGTCTGCTTCCCTGACTATTCTTGACTACAGCCACATCTCATTGCTACCCTGCTCCCCAA  
CCCAAAGCCTCCTTCGCGCCTTCCTCTCGTATTCCCTGAACTTAACCCACGTGTATGGGACA  
CCTCTA---CTCCCTCCCTGGCAACCAATCACCGGCCTATTACTATCCCATTAACCTAATCA

CCCTTACCCCAATTCAATGCCAGTATCCCATCCCACAACAGGCTTTAAAGGGATTGAAACCTG  
TTATCACTTGCCTGCTACAGTATGGGCTTCTAAAACCTGTAAACTCCCCTTACAATTCCCCCA  
TTTTACCTGTCCAAAACTGGACAAGTCTTACAGGTTACTTCAGGATCTGTGCCTTATCAAC  
CAAATTGTTTTGCCTATCCACCTTGTGGTGCGAAACCATGTACTCTCCTATCCTCAATACCT  
CCCTCCACAACCCATTATTCTGTTGTGGATCTCAAACATGCTTCTTTACTATTCTTTGCAC  
CCTTCATCCCAGCCTCTCTTCGCTTTCACCTGGACTGACCCCTGACACCCATCAGGCTCAGGA  
AATTACCTGGGCTGTACTGCTGCAAGGCTTCACGGACAGCCCCTATTACTTCAGTCAAGCCC  
AAATTTCTTCCTCATCTGTTACCTATCTTGGCATAATTC-TCATAAAAAACACAC--GTGCTCTCC  
CTGCTGATCATGTCTGGCTAATCTCCCAAACCCCAACCCCTTCTACAAAACAACAACTCCTT  
CCTTC-GTAGGCATGGTTAGCTACTTCCACCTTTGGATGCCTAGTTTTACCATCTTGACTAAA  
CCACGATGTAAACTCACAAAAGGAAACCTAGCTGACCCTACAGATCCTAAATCCTTTTTGCC  
ACTCCTTTCCATTCTTAAAAACGGCCCTAGAAGCTGCTCCACACTAGCTCTCCCTAACTC  
ATCCCAATCC-TTTTTATTACACACAGTCAAAGTGCAGGGCTGTGGGGTCAAAATTCTTAC  
ACAAGGATCGGGACCATGCCCTGTGGCCTTTTTATCCAAACAACCTTGACCTTACTGTTTTAG  
CTTAG-CCTCATGTCTGTGTGTGGCAGCTGCTGCTTCCTTAATACTTTTACAGAGGCCCTCAAAA  
TCACAAACTATGCTCAAC-----TCACTCTCTAGAGTTCTCATAACTTCCAAAATCTATTTTC  
TTCTCACACCTGATGCACATATTTCTGGC---CCCCTCCACTACCTCTCAACAAGCCAAACT  
CCTTGCCTTAACTCAAGCCCTCGCCCTTGCAAAAGGATTAAGTGTCAATATTTATACTGACT  
CTAAATATGCCTTCCATATCCTGCACCACCATGCTGTTATATGGGCAGAAAGAAATGTCCTAA  
CTATGCAAGGGTCCCTCCATCATTATGCCTCTTTAATAAAAACTCTTCTCAAAGCTGCTTTAC  
TTCCAAAGGAAGCTGGAGTCATTCAGTGAAGGACCATCAAAAGGCATCAGATCCCATTCG  
TCAGGACAGTGCTTATGCTGATACGGTAGCTAAA-AAGCAGCTAGCATTCCAACCTCTATCCC  
TCACGGCAGTTTTTCTCCTTCTCATTTGGCCACTCCCACCTACTCCCCCACTGAAACTTCCA  
CCTATCAATCTCTTCCCACGCAAGGCAAATGGTTCTTGGACCAAGGAAAATATCTCCTTCCA  
GCCTCACAGGCCCATCTATTCTGTATCATTTTATAACCTCTTCCATGTAGGTTGCAAGCTG  
CTAGCCACCTCTTAGAACCTCTCATTTCTTTCCATCGTGGAGATCTATCCTCAAGGAAATC  
ACTTCTCAG-TGTTCCATCTGCTATTCTACTACTCCTCAGGGATTGTTTACAGGCCCCCTCCCTT  
CCCTACACATCAAGCTTCGGGATTTGCCCTGCCCAGGACTGGCAAATTGACTTTACTCACA  
TGCCCCGAGTCAGGAAATTAATAACCTCTTGGTCTGGGTAGACACTTTCACTGGATGGGTA  
GAGGCCTTTCCCACAGGGTCTGCGAAGGCCACCGCGGTCATTTCTTCCCTTCTGTACAGGTAT  
AATTTCTCGGTTTGACCTTCTACCTCTATATAGTCCAATAATGGACCAGCCTTTGTTAGTTA  
AATCACCCAACCAGTTTCTCAGGCTCTTAG---TATTCAGTGGAACCTTTCATACCCCTTACCAT  
CCTCAATCTTCAGGAAAGGTA-----GAACGGGCTAATGGTCTTTTAAAAACACACCTCACCAA  
TCTCAGCCACCAACTTAAAAAGGACTAGACAATACTTTTACCCTTTCCGTTCTCAAAATTC  
GGGCCTGTCTCGGGATGCTACAGGGTACAGCCCATTTGAGCATCTGTATGAACCCTCCTAT  
TTATTAGGCCCCAGTCTTATTCCAGACACCAGCCCAACTGGACTGTGCCCCAAAACTTGT  
CATCCCTACTCTCTTCTGTCTAGTCATACTTCTATTACCGTTCTCAAATACTCATAAATGCCC  
TGCTCTTGTTTACACTGCCGGTTTACACTGTTTCTCCAAGCCATCACAGCTGATATCTCCTGG  
TGCTAT-CCCAAACCTGCCACTCTTAACTCCCTCTTAAAGTAAATAAATAATCTTTGCTGGCAG  
GGCTATGCTGAACCTCCTTGGGCACTCTCTGATTGGATGTCCTGGATCCTCCCAATTCTTAGT  
CTTTTAATACCTGTTTTTCTCCTTCTCTTATTACAGACCTTTT-GTCTTCCGTTTAGTTTTTCAGT  
TCATACAAAACCTACTTCCAGGCCATCACCAATCATTCTATATGATAAATGCTCCTTCTGACAA  
CCCCACAATATCACCCCTTACAACAAAATCTTCCTTCAGCTTAATCTCTCCCACTCTGGGTTT  
CCACGCCACCCCTAATCCTGCATGAAGCAGCCCTGAGAAACATCACCCATTATCTCTCCATG

CCTCCCCACAAAAAATTTTTCG-GGCCCAACACTTCAATACTATTTTGTATTATTTTCTTAT  
TAATATAAGAAGGCAG-----  
>Chlorocebus\_aethiops-HERVHF\_INT(+)  
-----CTAGTGAAATTTGGTGCCATGACTCAGATCGGG  
GGACCTCTCTTGGGAGATCACTCCCTGTCCTCCTGCTCTTTGCTCCGTGAGAAAGATCCAC  
TTACAACCTCAGGTCCTCAGACCAACCCGCCCCAAGAACATCTCACCATTTTAAATCGGG  
TAAGCAGCCTCTCTTTACTCTCTTCTCCAACCTTCTCTCACTATCCCTCAACCTCTTTCTCCTT  
TCAATCTTGGTGCCACACTTCAATCTTTCCCTTCTCTTAATTTAGTTCCCTTTCTTTCTGGT  
AGAGACAGAGGAGACGCGTTTTATCCGTGAACTCAAAACTCCTGCACCGGTCACCGACTC  
GGGAAGACAGTCTTTCTTTGGTATTTAATCCCTGCAGGGACGTCTGCCTGATTATTCACCCA  
CATTTCACTGGTGTCTGATCACCGCAGGGACGCTGCCTTGCTCATTACCCACAATCCCTT  
GGTGGCAAGTCCATTGCAGGGACGTCTGCTTTGGCTGTTACCCACATTGCAGCCTAGGGC  
TGCTCACCTCAC-----CCCTTCTCTCCGTGTCT  
CTACCCTCTCTTCTCTCCA-----CTTTCTTGGGGGGCTAGCACCCCC  
CATCC-----CTTCTCTCTGTGTCTCTACCC-----TCTCT  
TTTCTCTGGACTTGCCTCCTTCACTATGGGCAAACCTTC--CACCTCCATTTCTCCTTCTTCTC  
CCTTAGCCTGTGTTCTCAAGAACTTAAACCTCTTCAACTCACACCTGACCTAAAACCTTAA  
TGCTTATTTTCTTCTGCAATGCTGCTTAACCCC--AATACAACTCGAC-AATGGTTCCAAAT  
AGCCAGAAAACGGCACTTTTCGATTTCTCCATCCTACAAGAGCTAGATAATTCTCGTCATAAA  
ATGGGCAAATAGTCTGAGGTGCCTGATGTCCAGGCATTCTTTTACACATGGGTTCCCTCCCTG  
GTCTCTGTTCCCAATGCAACTCGTCCC-----AAATCTTCCTTC  
TTTCCCTCCCGCCTGTCCCCTCAGTCCCAACCCCAAGAGTTGCTGAGTCTTTCTAA--TCTTC  
CTTTTTTACGGACCCATCTGACCTCTCCCCTCCTCCCCAGGCTGCTCCTCGCCAGGCCGAGC  
CAGGTCCCAA-TTCTTCCTCAGCCTCCGTTCCCCACCCCTATAATCCTTTTATCACCTCCCCTC  
CTCACAC-----AACTAGCCCTCCCCACCTGCCAGCAATTATCTCTTAAAA  
AGGTGG-----CTGGAGCTGAAGGCATAGTCAGGGTTAATGCTCCTTTTTCTTTATCTGGCCTC  
TCCCAAATCAGTTAGCGTTTAGGCTCTTTTTTCATCAAATATAAAAACCCGGCCAGTTCATG  
GCTTGTTTGGTAGCAACCTGAGATGCTTTACTGCCCTAGACCCTGAAAGGTCAAAGGCT  
GTCTTATTCTCAATATACAT--TGTATACCCAATCCACTCCTGACATTAAATAAAACACCAAA  
AATTAAGTTCCGGCCCTCAAACCCCAACAAGACTTAA---CCTTGCCTGAAGGTGTACA  
ATAATAGAGAAGAGTTGCAATTACTTGCCTCTGCTGTGAGGGAAACCCAGCCACATCTTC  
AGCACACAAGAACTTCAAAATGCCTAAGCCACAGCAGCCAGGCGTTCCTTCAGGACTTTCT  
CCCCCAGGATCTTGCTTCAAGTGCTGGAAATCTGGCCACTGGGCCAAGGAATGCCCGTAGC  
CCAGGATTCC-TCCTAAACTGTGTCCCATCTGTGCGGGACCCCACTGGAAATTGGACTGTCC  
AACTGGCCCAAGGCTCTGACTGACTCCTTCCCAGATCTTCTCAGCTTA--GGCTGAAGACTG  
ACGCTGCCCATTGCCTTGGAAGCTTCCTGGACCATCCCAGACGCTTTGGGTAACCTCTTACA  
GTGGAGGGTAAGTCCGTCCCCTTCTTAATCAATATGGAGGCTACCCACTCCACATTACCTTC  
TTTTCAAGGGCCTGTTTCCCTTGCCTCCATAACTGTTGTGGGCATTGACAGACAGGCTTCTA  
AACCCTTATAACTCCCCCACTCTGGTGCTAACTTGGACAATATTCTTTTATGCACTCTTTTG  
TAGTTATCCCCACCTGCCAGTTCCTTATTAGGCCGAGATATTTTAACCAAATTGTCTGCTT  
CCCTGACTATTCTGGACTACAGCCACATCTCATTGCTACCCTGCTTCCCAACCCAAAGCCT  
CCTTCGAGCCTTCCTCTCGTATTCCCCGAACTTAACCCACGTGTATGGGACACCTCTA---CTC  
CCTCCCTGGCAACCAATCACCAGCCTATTACCATCCCATTAACCTAATCACCCTTACCCCA  
TTCAATGCCGGTATCCCATCCCAACAAGAGGCTTTAAAGGGATTGAAACCTGTTATCACTTGC



CTGCTACAGTATGGGCTTCTAAAACCTGTAAACTCCCCTTACAATTCCCCCATTTTACCTGTC  
CAAAAACCTGGACAAGTCTTACAGGTTACTTCAGGATCTGTGCCTTATCAACCAAATTGTTTT  
GCCTATCCACCTTGTGGTGCGAAACCCATCTACTCTCCTATCCTCAATACCTCCCCTCCACAAC  
CCATTATTCTGTTCTGGATCTCAAACACGCTTTCTTTACTATTCCCTTTCATCCTTCATCCCAG  
CCTCTTTTCGCTTTCACTTGGACTGACCCTGACACCCATCAGGCTCAGCAAATTACCCGGGC  
TGTA CTGCCGCAAGGCTTCACAGACAGCCCCATTACTTCAGTCAAGCCCAAATTTCTTCCT  
CATCTGTTACCTATCTTGGCATAATTC-TCATAAAAAACACAT--GTGCTCTCCCTGCTGATCATG  
TCTGGCTAATCTCCCAAACCCCAACCCCTTCTACAAAACAACAACCTCCTTCCTTC-GTAGGC  
ATGGTTAGCTACTTCCACCTTTGGATACCTAGTTTTTACCATCTTGACTAAACCACGATGTAAA  
CTCACAAAAGGAAACCTAGCTGACCCACAGATCCTAAGTCCTTTTGCCACTCCTTTCCATT  
CCTTAAAAACAGCCCTAGAAGCTGCTCCCACACTAGCTCTCCCTAACTCATCCCAATCC-TTT  
TTCATTACACACAGTCAAAGTGCAGGGCTGTGAGGTCAAATTCTTACACAAGGATCGGGA  
CCATGCCCTGTGGCCTTTATATCCAAACAACCTTGACCTTACTGTTTTAGCTTAG-CCTCATGTC  
TGTGTGTGGCAGCTGCTGCTTCCTTAATACTTTTTCAGAGGCCCTCAAATCACAACCTATGCT  
CAAC-----TCACTCTCTAGAGTTCTTATAACTTCCAAAATCTATTTTCTTCCTCACACCTGAT  
GCACATATTTCTGGT---CCCCTCCACTACCTCTCAGTAAGCCAACTCATTGCCTTAACTCA  
AGCCCTCGCCCTTGCAAAAAGGATTAAGTGTCAATATTTATACTGACTCTAAATATGCCTTCCA  
TATCTGCACCACCATGCTGTTATATGGGCAGAAAGAAATGTCCTAACTATGCAAGGGTCTCT  
CCATCATTAATGCGTCTTTAATAAAAACTCTTCTCAAAGCTGCTTTACTTCCAAAGGAAGCT  
GGAATCATTCACTGCAAGGGCCATCAAAGGCAT-AGATCCCATTGCTCAGGACAATGCTTA  
TGCTGATACGGTAGCTAAA-AAGCAGCTAGCATTCCAACCTCTATCCCTCATGGCAGTTTTTC  
TCCTTCTCATTGGCCACTCCCACCTACTCCCCACTGAACTTCCACCTATCAATCTCTTCC  
CACGCAAGGCAAATGGTTCTTGGACCAAGGAAAATATCTCCTTCCAGCCTCACAGGCCCAT  
TCTATTCTGTCATATTTTATAACCTCTTCCATGTAGGTTACAAGCTGCTAGCCCATCTCTTAG  
AACCTCTCATTTCCTTTCCATCGTGGAGATCTATCCTCAAGGAAATCACTTCTCAG-TGTTCC  
ATCTGCTATTCTACTACTCCTCAGGGATTATTCAGGCCCCCTCCCTTCCCTACACATCAAGCT  
TGGGGATTTGCCCTGCCCAGGACTGGCAAATTGACTTTACTCACATGCCCTGAGTCAGGA  
AACTAAAATACCTCTTGGTCTAGGTAGACACTTTCACTGGATGGGTAGAGGCCTTTCCACA  
GGGTCTGCAAAGGCCACTGTGGTCATTTCTTCCCTTCTGTCAGGTATAATTCCTCAGTTTGA  
CCTTCCTACCTCTATACAGTCCAATAATGGACCAGCCTTTGTTAGTTAAATCACCCAACCACT  
TTCTCAGGCTCTTAG---TATTCAGTGGAACCTTTTATACCCCTTACCATCCTCAATCTTCAGGA  
AAGGTA-----GAACGGGCTAATGGTCTTTTAAAAACACACCTCACCAATCTCAGCCACCAAC  
TAAAAAAGGACTAGACAATACTTTTACCCTTTCCCTTCTCAAATTTGGGCCTGTCCCTCGG  
GATGCTACAGGGTACAGCCATTTGAGCATCTGTATGAACCCTCCTTTTTATTAGGCCCCAGT  
CTTATTCCAGACACCAGCCCAACTTGGACTGTGCCCAAAAACTTGTATCCCTACTCTCTT  
CTGTCTAGTCATACTCCTATTACCATTTCTCAAATACTCATAAATGCCCTGCTCTTGTTTACAC  
TGCCGGTTTACACTGTTTCTCCAAACCATCACAGCTGATATCTCCTGGTGCTAT-CCCAAACCT  
GCCACTCTTAACTCCCTCTTAAAGTAAATAAATAATCTTTGCTGGCAGGGCTATGCTGAACC  
TCCTTGGGCACTCTCTAATTGGATGTCCTGGATCCTCCCAATTCTTAGTCCTTTAATACCTGT  
TTTTCTCCTTCTCTTATTAGACCTTTT-GTCTTCCATTAGTTTTTTCAATTATACAAAACCTGC  
TTCCAGGCCATCACCAATCATTCTATATGATAAATGCTCCTTCTAACAACCCCAACAATATCAC  
CCCTTACCACAAAATCTTCCCTCAGCTTAATCTCTCCCACTCTGGGTTTCCATGCCACCCCTA  
ATCCTGCATGAAGCAGCCCTGAGAAACATCACCCATTATCTCTCCATGCCACCCCTCCAAAAA  
ATTTTTGC-TGCCCAACACTTCAATACTATTTTGTATTATTTTCTTATCAATATAAGAAGGCA

GG-----

>Chlorocebus\_sabaeus-HERVHF\_INT(-)

-----GCTAGTGAAATTTGGTGCCATGACTCAGATCGG  
GGGACCTCTCTTGGGAGATCACTCCCCTGTCCTCCTGCTCTTTGCTCCGTGAGAAAGATCCA  
CTTACAACCTCAGGTCCTCAGACCAACCCGCCCAAGAACATCTCACCAATTTTAAATCGG  
GTAAGCAGCCTCTCTTTACTCTCTTCTCCAACCTTCTCTCACTATCCCTCAACCTCTTTCTCCT  
TTCAATCTTGGTGCCACACTTCAATCTTTCCCTTCTCTTAATTTTCAGTTCCTTTCTTTCTG  
TAGAGACAGAGGAGACGCGTTTTATTTCGTGAACTCAAACTCCTGCACCGGTCACCGACTC  
GGGAAGACAGTCTTTCTTTGGTATTTAATCCCTGCAGGGACGTCTGCCTGATTATTCACCCA  
CATTTCACTGGTGTCTGATCACCGCAGGGACGCTGCCTTGCTCATTACCCACAATCCCTT  
GGTGGCAAGTCCATTGCAGGGACGTCTGCTTTGGCTGCTCACCCACATTGCAGCCTAGGGC  
TGCTCACCTCAC-----CCCTTCTCTCCGTGTCT  
CTACCCTCTCTTCTCTCCA-----CTTTCTTGGGGGGCTAGCACCCCC  
CACCC-----CTTCTCTCTGTGTCTCTACCC-----TCTCT  
TTTCTCTGGACTTGCCTCCTTCACTATGGGCAAACCTTC--CACCTCCATTTCCTTCTTCTC  
CCTTAGCCTGTGTTCTCAAGAACTTAAAACCTCTTCAACTCACACCTGACCTAAAACCTTAA  
TGCCTTATTTCTTCTGCAATGCTGCTTAACCCC--AATACAACTCGAC-AATGGTTCCAAAT  
AGCCAGAAAACGGCACTTTCGATTCTCCATCTACAAGAGCTAGATAATTCTCGTCATAAA  
ATGGGCAAATAGTCTGAGGTGCCTGATGTCCAGGCATTCTTTTACACATGGGTTCCCTCCCTG  
GTCTCTGTTCCCAATGCAACTCGTCCC-----AAATCTTCCTTC  
TTTCCCTCCCGCCTGTCCCCTCAGTCCCAACCCCAAGAGTTGCTGAGTCTTTCTAA--TCTTC  
CTTTTTTACGGACCCATCTGACCTCTCCCCTCCTCCCCAGGCTGCTCCTCACCAGGCCAAGC  
CAGGTCCCAA-TTCTTCCTCAGCCTCCGTTCCCCCACCTATAATCCTTTTATCACCTCCCCTC  
CTCACAC-----AACTAGCCCTCCCCACCTGCCCAGCAATTATCTCTTAAAA  
AGGTGG-----CTGGAGCTGAAGGCATAGTCAGGGTTAATGCTCCTTTTTCTTTATCTGGCCTC  
TCCCAAATCAGTTAGCGTTTAGGCTCTTTTTTATCAAATATAAAAACCCGGCCCAAGTTCATG  
GCTTGTTTGGTAGCAACCTGAGATGCTTTACTGCCCTAGACCCTGAAAGGTCAAAGGCT  
GTCTTATTTCTCAATATATAT---TGTATACCCAATCCACTCCTGACATTAAATAAAACACCAAA  
AATTAAGTTCCGGCCCTCAAACCCCAACAAGACTTAA---CCTTGCCTTGAAGGTGTACA  
ATAATAGAGAAGAGTTGCAATTACTTGCTCTGCTGTGAGGGAAACCCCAAGCCACATCTTC  
AGCACACAAGAACTTCAAATGCCTAAGCCACAGCAGCCAGGCGTTCCTTCAAGGACTTTCT  
CCCCCAGGATCTTGCTTCAAGTGCTGGAAATCTGGCCACTGGGCCAAGGAATGCCCGTAGC  
CCAGGATTCC-TCCTAAACTGTGTCCCATCTGTGCGGGACCCCACTGGAAATTGGACTGTCC  
AACTGGCCCAAGGCTCTGACTGACTCCTTCCCAGATCTTCTCAGCTTA--GGCTGAAGACTG  
ACGCTGCCCCGATTGCCTTGGAAGCTTCCTGGACCATCCCAGACGCTTTGGGTAACTCTTACA  
GTGGAGGGTAAGTCCGTCCCCTTCTTAATCAATATGGAGGCTACCCACTCCACATTACCTTC  
TTTTCAAGGGCCTGTTTCCCTTGCCTCCATAACTGTTGTGGGCATTGACAGCCAGGCTTCTA  
AACCCTTATAACTCCCCACTCTGGTGCTAACTTGGACAATATTCTTTTATGCACTCTTTTG  
TAGTTATCCCCACCTGCCAGTTCCTTATTAGGCCGAGATATTTTAAACCAATTGTCTGCTT  
CCCTGACTATTCTTGACTACAGCCACATCTCATTTGCTACCCTGCTTCCCAACCCAAAGCCT  
CCTTCGAGCCTTCCTCTCGTATTCCCCGAACCTTAACCCACGTGTATGGGACACCTCTA---CTC  
CCTCCCTGGCAACCAATCACCAGCCTATTACCATCCCATTAACCTAATCACCCTTACCCCA  
TTCAATGCCGGTATCCCATCCCAACAAGAGGCTTTAAAGGGATTGAAACCTGTTATCACTTGC  
CTGCTACAGTATGGGCTTCTAAAACCTGTAAACTCCCCTTACAATTCCCCCATTTTACCTGTC

CAAAAAGTGGACAAGTCTTACAGGTTACTTCAGGATCTGTGCCTTATCAACCAAATTGTTTT  
GCCTATCCACCTTGTGGTGCGAAACCCATCTACTCTCCTATCCTCAATACCTCCCTCCACAAC  
CCATTATTCTGTTCTGGATCTCAAACACGCTTTCTTTACTATTCCCTTTCATCCCTCAG  
CCTCTTTTCGCTTTCACTTGGACTGACCCTGACACCCATCAGGCTCAGCAAATTACCCGGGC  
TGTAAGTCCGCAAGGCTTCACAGACAGCCCCATTACTTCAGTCAAGCCCAAATTTCTTCCT  
CATCTGTTACCTATCTTGGCATAATTC-TCATAAAAAACACAT--GTGCTCTCCCTGCTGATCATG  
TCTGGCTAATCTCCCAAACCCCAACCCCTTCTACAAAACAACAACCTCCTTCCTTC-GTAGGC  
ATGGTTAGCTACTTCCACCTTTGGATACCTAGTTTTACCCTCTTGACTAAACCACGATGTAAA  
CTCACAAAAGGAAACCTAGCTGACCCACAGATCCTAAGTCCTTTTGCCACTCCTTTCCATT  
CCTTAAAAACAGCCCTAGAAGCTGCTCCACACTAGCTCTCCCTAACTCATCCCAATCC-TTT  
TTCATTACACACAGTCAAAGTGCAGGGCTGTGAGGTCAAATTTCTTACACAAGGATCGGGA  
CCATGCCCTGTGGCCTTTATATCCAAACAACCTTGACCTTACTGTTTTAGCTTAG-CCTCATGTC  
TGTGTGTGGCAGCTGCTGCTTCCTTAATACTTTCAGAGGCCCTCAAATCACAACCTATGCT  
CAAC-----TCACTCTCTAGAGTTCTTATAACTTCCAAAATCTATTTTCTTCCTCACACCTGAT  
GCACATATTTCTGGT---CCCCCTCCACTACCTCTCAGCAAGCCAAACTCATTGCCTTAACTCA  
AGCCCTCGCCCTTGCAAAAAGGATTAAGTGTCAATATTTATACTGACTCTAAATATGCCTTCCA  
TATCCTGCACCACCATGCTGTTATATGGGCAGAAAGAAATGTCCTAACTATGCAAGGGTCTCT  
CCATCATTAATGCCTCTTTAATAAAAACTCTTCTCAAAGCTGCTTTACTTCCAAAGGAAGCT  
GGAATCATTCACTGCAAGGGCCATCAAAGGCAT-AGATCCCATTGCTCAGGACAAGGCTTA  
TGCTGATACGGTAGCTAAA-AAGCAGCTAGCATTCCAACCTCTATCCCTCACGGCAGTTTTTC  
TCCTTCTCATTTGGCCACTCCACCTACTCCCCACTGAAACTTCCACCTATCAATCTCTTCC  
CACGCAAGGCAAATGGTTCTTGGACCAAGGAAAATATCTCCTTCCAGCCTCACAGGCCCAT  
TCTATTCTGTCATCATTTTATAACCTCTTCCATGTAGGTTACAAGCTGCTAGCCCATCTCTTAG  
AACCTCTCATTTCTTTCCATCGTGGAGATCTATCCTCAAGGAAATCACTTCTCAG-TGTTCC  
ATCTGCTATTCTACTACTCCTCAGGGATTGTTCAAGCCCCCTCCCTTCCCTACACATCAAGCT  
TGGGGATTTGCCCTGCCCAGGACTGGCAAATTGACTTTACTCACATGCCCCGAGTCAGGA  
AACTAAAATACCTCTTGGTCTAGGTAGACACTTTCACTGGATGGGTAGAGGCCTTTCCACA  
GGGTCTGCAAAGGCCACTGTGGTCATTTCTTCCCTTCTGTCAGGTATAATTCCTCGGTTTGA  
CCTTCCTACCTCTATACAGTCCAATAATGGACCAGCCTTTGTTAGTTAAATCACCCAACCAGT  
TTCTCAGGCTCTTAG---TATTCAGTGGAACTTTTCATATCCCTTACCATCCTCAATCTTCAGGAA  
AGGTA-----GAACGGGCTAATGGTCTTTTTAAAAACACACCTCACCAATCTCAGCCACCAACTT  
AAAAAGGACTAGACAATACTTTTACCCTTTCCCTTCTCAAATTTGGACCTGTCCTCGGGA  
TGCTACAGGGTACAGCCCATTTGAGCATCTGTATGAACCCTCCTTTTTATTAGGCCCCAGTCT  
TATTCCAGACACCAGCCCAACTTGGACTGTGCCCCAAAAACTTGTCTATCCCTACTCTCTTCT  
GTCTAGTCATACTCCTATTACCACTTCTCAAATACTCATAAATGCCCTGCTCTTGTTTACACTG  
CCGGTTTACACTGTTTCTCCAAACCATCACAGCTGATATCTCCTGGTGCTAT-CCCAAACCTGC  
CACTCTTAACTCCCTCTTAAAGTAAATAAATAATCTTTGCTGGCAGGGCTATGCTGAACCTCC  
TTGGGCACTCTCTAATTGGATGTCCTGGATCTCCCAATTCTTAGTCCTTTAATACCTGTTTTT  
CTCCTTCTCTTATTCAGACCTTTTGGTCTTCCATTTAGTTTTTCAATTCATACAAAACCTGCTTC  
CAGGCCATCACCAATCATTCTATATGATAAATGCTCCTTCTAACAACCCCAATATCACCCC  
TTACCACAAAATCTTCCTTCAGCTTAATCTCTCCACTCTGGGTTTCCATGCCACCCCTAATC  
CTGCATGAAGCAACCCTGAGAAACATCACCCATTATCTCTCCATGCCACCCTCCAAAAAATT  
TTTGC-TGCCCAACACTTCAATACTATTTTGTATTATTTTCTTATCAATATAAGAAGGCAG---

-----

>Colobus\_guereza-HERVHF\_INT(-)

-----GAAATTTGGTGCCATGACTCAGATTGGGGT  
ACCTCCCTTGGGAGATCAATCCCCTGTCTCCTGCTCTTTGCTGCATGAGAAAGATCCACTT  
ACGACCTCAGGTCTCAGACCAACCAGCCCCAAGAACATCTCACCAATTTTAAATCGGGTA  
AGCAGCCTCTCTTTACTCTCTTCTCCAACCTCTCTCACTATCCCTCAACCTCTTTCTCCTTTC  
AATCTTGGTGCCACACTTCAATCTCTCCCTTCTCTTAATTTTCAGTTCCCTTTTCTTTCTGGTA  
GAGACAGAGGAGACACGTTTTATCCGTGAATCCAAAACCTCCGGCACCAGTCACCTACTCGG  
GAAGACAGTCTTCCCTTGGTGTTAATCCCTGCAGGGACGCCTGCCTGATTATTCACCCACA  
-TTCATTGGTGTCTGATCACTGCAGGGACGCCTGCCTTGGTCATTCATCCACATTCCCTTGGT  
GGCAAGTCAATTGCAGGGATGCCTGCTTTGGCTGCTCACCCACATTGCAGCCTAGGGCTGC  
TCACCCAC-----CCCTTCTCTCCTTGTCTCTA  
CCCTCTCTTCTCTCCA-----CTTCTTGGGGGGCAAGCA-CCCCAC  
CC-----CCTCTCTCTGTGTCTCTACCC-----TCTCTTTT  
CTCTGGACTTGCCTCCTTCACTATGGGCAACCTTC--CACCTCCATGCCTCCTTCTTCTCCCT  
TAGCCTGTGTTCTCAAGAACTTAAACCTCTTCAAGTCACACCTGACCTAAAACCTAAATG  
CCTTATTTTCTTCTGCAACACCACTTGGCCCC--AACACAACTTGAC-AATGGTTCCAAATA  
GCCAGAAAACGGCACTTTCGATTTCTCCATCCTACAAGATCTAGATAATTCTTGTCAATAAAT  
GGGCAAATAGTCTGAGGTGCCTGATGTCCAGGCATTCTTTTACACATGGGTCCCTCCCTGGT  
CTCTGTTCCCAATGCAACTCGTCCC-----AATCTTCCTTCTTT  
CCCTCCACCTGTCCCCTCAGTCCCAACCCCAAGAGTTGCTGAGTCTTTCTAA--TCTTCCTT  
TTTTACAGACCCATCTGACCTCTCCCCTCCTCCCCAGGCTGCTCCTCGCCAGGCCAAGCGA  
GGTCCCAA-TTCTTCCTCAGCCTCCACTCCCCACCCTATAATCCTTTTGTACCTCCCCTCC  
TCACACCTGGTCCGACTTACAGTTTCACTTCTGTGACTAGCCCTCCCCACCTGCCAGCAAT  
TACCTCTTAAAAAGGTGG-----CTGGAGCTGAAGACATAGTCAAGGTTAATGCTCCTTTTTTCT  
TTTATCTGGCTTCTCCCAAATCAGATAGCGTTTAGGCTCTTTTTTCATCAAATATAAAAACCCA  
GCCCAGTTCATGGCTTGTTTGGCAACAACCCTGAGACGCTTACTGCCCTAGACCCTGAAA  
GGCCAAAAGGCTGTCTTATTCTCAATATACAT---TGTATTACCCAATCCACTCCTGACATTAAA  
TAAAACACCAAAAATTAAGTTCCAGCCCTCAAACCTCCACAACAGGACTTAATTAACCTTGC  
CTTCAAGGTGTACAATAATAGAGAAGAGTTGCAATC-CTTGCCTCCTCTGTGAAAGAAACCC  
CAGCCACATCTCCAGCACACAAGAACTTCAAATGCCTAAGCCACAGTGGCCAGGCGTTC  
CTTCAGGACTTTCTCCCCCAGGATCTTGCTTCAAGTGCTGGAAA-CTGGCCACTGGGCCAA  
GGAATGCCCCGTAGCCCAGGATTCC-CCCTAAGACGTATCCCATCTGTACGGGACCCCACTGG  
AAATTGGACTGTCCAACCTGACCCAAGGCTCTGACTGACTCCTTCCCAGATCTTTTCGGCTTA  
GCGGCCGAAGACTGATGCTACCCAATCACCTTGGAAGCTTCCTGGACCATCCCAGATGCTT  
TGGGTAACTCTTACAGTTGAGGGTAAGTCTGTCCCCCTTCTTAATCAATACAGAGGCTACCCA  
CTCCACATTATCTTCTTTTCAAGGGCTGTTTCCCTTGCTCCATAACTGTTGTAGGTATTGAT  
GGCCAGGCTTCTAAACCCCTTAAACCTCCCGCACTCTGGTGCTAAGTTGGACAACATTCTTT  
TATGCACTCTTCTTTAGTTA-CCCCACCTGCCAGTTCCCTTATTAGGCCGAGATATTTAAACC  
AAATTGTCTGCTTCCCTGACTATTCCTGGACTACAGCCACATCTCATTGCTACCCTGCTTCCC  
AACCATAGCCTCCTTCGTGCCTTCCTCTCGTATCCCCCAAACCTTAACCCACAAGTATGGGA  
TAACTCTA---CTCCCTCCCTGGCAACTGATCACCAGCCTATTACTATCCATT-AAACCTAATC  
ACCCTTACCCCGCTCAATGCCAGTATCCCATCCCACAACAGCCTTTAAAGGGATTGAAGCCT  
GTTATCACTCGCCTGCTACAGTATGGGCTTCTAAACCTGTAAACTCCCTTACAATTCCCCC  
ATTTTACCTGTCCAAAAACCGGACAAGTCTTACAGGTTACTTCAGGATCTGTGCCTTATCAA

CCAAATTGTTTTGCCTATCCACCTTGTGGTGTGAAACCCATTACTCTCCTATCCTCGATACC  
 TCCCTCCACAACCCATTATTCTGTTCTGGATTGTAAACATGCTTTGTTTACTATTCTTTGCAT  
 CCTTCATCCCAGCCTCTTTTCAATTCCACTTGGACTGACCCTGACACCCATCAGGCTCAGGA  
 AATTACCTGGGCTGTACTGCCTCAAGACTTCGTGGACAGCCCCTATTACTTCAGTCAAGCCC  
 AAATTTCTTCCTCATCTGTTACCTATCTTGGCATAATTC-TCATAAAAACACAC--GTGCTCTCC  
 CTGCTGATCATGTCTGGCTAATCTCCCAAACCCCAACCCCTTCTACAAAACAACAACTCCTT  
 CCTTC-ATAGGCATGGTTAGGTACTTCCACCTTTGGATACCTAGTTTTACCATCTTGACTAAAC  
 CATGATGTAAACTCACAAAAGGAAACCTAGCTGACCCACAGATCCTAAATCCTTTGACCA  
 CTCCTTTCCATTCTTAAAAACAGCCCTAGAAGCTGCTCCCACACTAGCTCTCCCTAACTCA  
 TCCCAATCC-TTTTTATTACACACAGTCAAAGTGCAGGGCTGTGAGGTCAAATTCCTTACA  
 CAAGGATCGGGACCATGCCCTGTGGCCTTTTTATCCAAACAACCTTGACCTTACTGTTTTAGC  
 TTAG-CCTCGTGTCTGTGTGTGGCAGCTGCCACTTCCTTAATACTTTTAGAGGCCCTCAAAAT  
 CACAACTATGCTCAAC-----TCACTCTCTAGAGTTCTCATAACTTCCAAAATCTATTTTCT  
 TCCTCACACCTGATGCACATATTTTCTGCT---CCCCTCCACTACCTCTCAACAAGCCAACTC  
 ATTGCCTTAACTCAAGCCCTCGCTCTTGCAAAAGGATTAAGCATCAGTATTTATACTGACTTT  
 AAATATGCCTTCCATATCCTGCACCACCATGCTGTTATATGGGTAGAAAGAAATTCCTCACT  
 ATGCAAGGGTCCTCCATCATTAATGCCTCTTTAATAAAAACTCTCCTCAAAGCTGCTTTACTT  
 CCAAAGGAAGCTGGAGTCATTCACTTCAAGGGCCATCAAAGGCATCAGATCCCATTGCTC  
 AGGACAATGCTTATGCTGATATGTTAGCTAAA-AAGCAGCTAGCATTCCAACCTTCTGTCCCC  
 ACAGCAGTTTTTCTCCTTCTCATCTGGCCACTCCCACCTACTCCCCCGCTGAAACTTCCACC  
 TATCAATTTCTTCCACACAAGGCAAATGGTTCTTGACCAAGGAAAATATCTCCTTCCAGC  
 CTCACGGGCCCATTCTATTCTGTCTGTCATTTTATAACCTCTTCCATGTAGGTTACAAGCTGCT  
 TGCCCATCTCTTAGAACCTCTCATTTCCCTTCCATCGTGGAAATCTATCCTCAAAGGAAATCAC  
 TTCTCAG-TGTTCCATCTGCTATTCTACTAATCCTCAGGGATTGTTAGGCCCCCTCCCTTCCC  
 TACACATCAAGCTAGGGGATTGCCCCCTGCCAGGACTGGCAAATTGACTTTACTCACATGC  
 CCCGAGTCAGGAACTAAAATACCTCTTGGTCTGGGTAGACACTTTCACTGGATGGGTAGA  
 GGCCTTTCCACAGGGTCTGCAAAGGCCACCGTGGTCATTTCTTCCCTTCTGTGAGGCATAA  
 TTCTTGTTTTGACCTTCTTACCTCTATACAGTCCAATAATAGACCAGCCTTTGTTAGTTAAA  
 TCACCCAACCAATTTCTCAGGCTCTTAG---TATTGAGTGAATTTTCATACCCCTTACCATCCT  
 CAATCTTCAGGAAAGGTA-----GAACGGGCTAATGGTCTTTTAAAATCACACCTCACCAAGCT  
 CAGCCACCGACTTAAAAAAGACTAGACAATACTTTTACCCTTTCCCTTCTCAAAATTCGGG  
 CCTGTCTCGGGATGCTACAGGGTACAGCCATTTGAGCTTCTGTATGAATGCTCATTTTAT  
 TAGGCCCCAGTCTTATTCCAGACACGAGCCCAACTTGGACTGTGCCCCAAAAACTTGTCAT  
 CCCTACTCTCTTCTGTCTAGTCATACTCCTATTACCGTTCTCAAATACTCATAAATGCCCTGC  
 TCTTGTTTACACTGCTGGTTTGCACCTGTTTCTCCAAGCCATCACAGCTGATGTCTCCTGGTG  
 CTAT-CCCAAAGTCCACTCTTAACTCCCTCTTAAAGTAAATAAATACTCTTTGCTGGCAGGG  
 CTATGCTGAACCTCCTTGGGCACTCTCTAATTGGATGTCCTGGATCCTCCCAATTCTCAGTGC  
 TTTAATACCTGTTTTTCTCCTTCTCTTATTCGGACCTTTT-GTCTTCCGTTTAGTTTTTCAATTC  
 ATACAAAAGTCTTCCAGGCCATCACCAATCATTCTATATGATAAATGCTCCTTCTAACAACC  
 CCACAATAGCACCCCTTACCCCAAAATCTTTCTTCAAGCTTAATCTCTCCCACTCTGGGTTTCC  
 ATGCCACCCCTAATCCCGCTTGAAGCAGCCCTGAGAAATATCACCCATTATCTCTCCATACCA  
 CCCCCCAAAAATTTTTGC-TGCCCTAACACTTCAACACTATTTTATATTATTTTCTTATTAAT  
 ATAAGAAGGCAG-----

>Erythrocebus\_patas-HERVHF\_INT(-)

-----GCTAGTGAAATTTGGTGCCATGACTCAGATCGG  
GGGACCTCTCTTGGGAGATCACTCCCCTGTCCTCCTGCTCTTTGCTCCATGAGAAAAGATGCA  
CTTACAACCTCAGGTCTCAGACCAACCCGCCCAAGAACATCTCACCAATTTTAAATCGG  
GTAAGCAGCCTCTCTTTACTCTCTTCTCCAACCTCTCTCACTATCCCTCAACCTCTTTCTCCT  
TTCAATCTTGGTGCCACACTTCAATCTTTCCCTTCTCTTAATTTCAAGTTCCTTTCATTTTCTGG  
TAGAGACAGAGGAGACGCGTTTTATCCGTGAACTCAAACTCCTGCACCGGTCACCGACTC  
GGGAAGACAGTCTTTCTTTGGTGTTAATCCCTGCAGGGACGTCTGCCTGATTATTCACCCA  
CATTTTCATTGGTGTCTGATCACCGCAGGGACGCTGCCTTGCTCATTACCCACAATCCCTT  
GGTGGCAAGTCCATTGCAGGGACGCTGCTTTGGCTGCTCACCCACATTGCAGCCTAGGGC  
TGCTCACCTCAC-----CCCTTCTCTCCATGTCT  
CTACCCTCTCTTCTCTCCA-----CTTTCTTGGGGGGCTAGCACCCCC  
CACCC-----CTTCTCTCTGTGTCTCTACCC-----TCTCT  
TTTCTCTGGACTTGCCTCCTTCACTATGGGCAAACCTTC--CACCTCCATTCTCCTTCTTCTC  
CCTTAGCCTGTGTTCTCAAGAACTTAAAACCTCTTCAACTCACACCTGACCTAAAACCTTAA  
TGCCTTATTTTCTTCTGCAATGCCGCTTAACCCC--AATACAACTCGAC-AATGGTTCCAAAT  
AGCCAGAAAACGGCACTTTTCGATTCTCCATCCTACAAGAGCTAGATAATTCTCGTCATAAA  
ATGGGCAAATAGTCTGAGGTGCCTGATGTCCAGGCATTCTTTTACACATCGGTACCTCCCTG  
GTCTCTGTTCCCAATGCAACTCATCCC-----AAATCTTCCTTC  
TTTCCCTCCCGCCTGTCCCCTCAGTCCCAACCCCAAGAGTTGCTGAGTCTTTCTAA--TCTTC  
CTTTTTTACGGACCCATCTGACCTCTGCTCTCCTCCCCAGGCTGCTCCTCACCAGGCCAAGC  
CAGGTCCCAA-TTCTTCTCAGCCTCCGTTCCCCACCTATAATCCTTTTATCACCTCCCCTC  
CTCACAC-----AACTAGCCCTCCCCACCTGCCAGCAATTATCTCTTAAAA  
AGGTGG-----CTGGAGCTGAAGGCATAGTCAGGGTTAATGCTCCTTTTTCTTTATCTGGCCTC  
TCCCAAATCAGTTAGCGTTTAGGCTCTTTTTTCATCAAATATAAAAACCCGGCCCAAGTTCATG  
GCTTGTTTGGTAGCAACCTGAGATGCTTTACTGCCCTAGACCCTGAAAGGTCAAAAGGCT  
GTCTTATTCTCAATATACAT--TGTATACCCCAATCCACTCCTGACATTAAATAAAACACCAAA  
AATTAAGTTCCGGCCCTCAAACCCCAACAAGACTTAA----CCTTGCCTTGAAGGTGCACA  
ATAATAGAGAAGAGTTGCAATCACTTGCCTCTGCTGTGAGGGAAGCCCCAACCACATCTTC  
AGCACACAAGAACTTCAAAATGCCTAAGCCACAGCAGCCAGGCGTTCCTTCAGGACTTTCT  
CCCCCAGGATCTTGCTTCAAGTGTGGAATCTGGCCACTGGGCCAAGGAATGCCCCGAGC  
CCAGGATTCC-TCCTAAATTGTGTCCCATCTGTGTGGGACCCCACTGGAAATTGGACTGTCTC  
ACTGGCCCAAGGCTCTGACTGACTCCTTCCCAGATCTTCTCAGCTTA--GGCTGAAGACTGA  
TGCTGCCCCGATTGCCTTGGAAGCTTCCTGGACCATCCAGACGCTTTGGGTAACCTTTACAG  
TGGAGGGTAAGTCCGTCCCCTTCTTAATCAATATGGAGGCTATCCACTCCACATGACCTTCTT  
TTCAAGGGCCTGTTTCCCTTGCCTCCATAACTGTTGTGGGCATTGACAGCCAGGCTTCTAAA  
CCCCTTATAACTCCCCACTCTGGTGCTAACTGGACAATATTCTTTTATGCACTCTTTTTTAG  
TTATCCCCACCTGCCAGTTCCCTTATTAGGCCGAGATATTTTAAACCAAATTGTCTGCTTCCC  
TGACTATTCTGGACTACAGCCACATCTCATTGCTACCCTGCTTCCCAACCCAAAGCCTCCT  
TCGAGCCTTCTCTCGTATTCCCCAACTTAACCCACGTGTATGGGACACCTCTA--CTCCCT  
CCCTGGCAACCAATCACCAGCCTATTACCATCCCATTAACCACTAATCACCCTTACCCCATTC  
AATGCCAGTATCCCATCCCACAACAGGCTTTAAAGGGATTGAAACCTGTTATCACTTGCCTG  
CTACAGTATGGGCTTCTAAAACCTGTAACTCCCCTTACAATTCCCCCATTTTACCTGTCCAA  
AAACTGGACAAGTCTTACAGGTTACTTCAGGATCTGTGCCTTATCAACCAAATTGTTTTGCC  
TATCCACCTTGTGGTGCGAAACCCATCTACTCTCCTATCCTCAATACCTCCCTCCACAACCCA

TTATTCTGTTCTGGATCTCAAACACGCTTTCTTTACTATTCCCTTTGCATCCTTCATCCCAGCCT  
 CTTTTCGCTTTCACTTGGACTGACCCTGACACCCATCAGGCTCAGCAAATTACCCGGGCTGT  
 ACTGCCGCAAGGCTTCACAGACAGCCCCATTACTTCAGTCAAGCCCCAAATTTCTTCCTCAT  
 CTGTTACCTATCTTGGCATAATTC-TCGTAAAAACACAC--GTGCTCTCCCTGCTGATCATGTC  
 TGGCTAATCTCCCAAACCCCAACCCCTTCTACAAAACAACAACCTCCTTCCTTC-GTAGGCAT  
 GGTAGCTACTTCCACCTTTGGATACCTAGTTTTACCATCTTGAATAAACACGATGTAACT  
 CACAAAAGGAAACCTAGCTGACCCACAGATCCTAAATCCTTTTGCCACTCCTTTCCATTCC  
 TTA AAAACAGCCCTAGAAGCTGCTCCCACTAGCTCTCCCTAACTCATCCCAATCC-TTTTT  
 CATTACACACAGTCAAAGTGCAGGGTTGTGAGGTCAAAATTCTTACACAAGGTCGGGACC  
 ATGCCCTGTGGCCTTTATATCCAAACAACCTTGACCTTACTGTTTTAGCTTAG-GCTCATGTCT  
 GTGTGTGGCAGCTGTTGCTTCCTTAATACTTTTCAAGAGGCCCTCAAAATCACAACTATGCTC  
 AAC-----TCACCTCTAGAGTTCTCATAACTTCCAAAATCTATTTTCTTCCTCACACCTGAT  
 GCACATATTTCTGGC---CCCCTCCACTACCTCTCAACAAGCCAAACTCATTGCCTTAACTCA  
 AGCCCTCGCCCTTGCAAAAGCATTAAGTGTCAATATTTATACTGACTCTAAATATGCCTTCCA  
 TATCCTGCACCACCATGCTGTTATATGGGCAGAAAGAAATGTCCTAACTATGCAAGGGTCCT  
 CTATCATTAATGCCTTTTTTAATAAAAACCTTCTCTCAAAGCTGCTTTACTTCCAAAGGAAGCTG  
 GAATCATTCAGTCAAGGGCCATCAAAAGGCAT-AGATCCCATGCTCAGGACAATGCTTAT  
 GCTGATACTGTAGCTAAA-AAGCAGCTAGCATTCCTAACTTCTATCCCAACACGGCAGTTTTTCT  
 CCTTCCCATTTGGCCACTCCACCTACTCCCCACTGAAACTTCCACCTATCAATCTCTTCCC  
 ACGCAAGGCAAATGGTTCTTGGACCAAGGAACATATCTCCTTCCAGCCTCACAGGCCATT  
 CTATTCTGTCGTCATTTTATAACCTCTTGCATGTAGGTTACAAGCTGCTAGCCCATCTCTTAG  
 AACCTCTCATTTCTTTCCATCGTGGAATCTATCCTCAAGGAAATCACTTCTCAGTTGTTCC  
 CTCTGCTATTCTACTACTCCTCAGGGATTGTTCAAGGCCCTCCCTTCCCTACACATCAAGCT  
 TGGAATTTGCCCCGCCCCAGGACTGGCAAACCTGACTTTACTCACATGCCCTGAGTCAGGA  
 AACTAAAATCCCTCTTGGTCTGGGTAGACACTTTTATTGGATGGGTAGAGGCCTTTCCACA  
 GGGTCTGAGAAGGCCACCGTGGTCATTTCTTCCCTTCTGTCAGACATAATTCCTCGGTTTGA  
 CCTTCTACCTCTATACAGTCCAATAATGGACCAGCCTTTGTTAGTTAAATCACCCAACAGT  
 TTCTCAGGCTCTTAG---TATTCAGTGGAACCTTTTATACCCCTTACCGTCTCAATCTTCAGGA  
 AAGGTA----GAACGGGCTAATGGTCTTTTAAAAACACACCTCACCAATCTCAGCCACCAAC  
 TAAAAAAGGACTAGACAATACTTTTACCCTTTCCCTTCTCAAAATTTGGGCCTGTCTCGG  
 GATGCTACAGGGTACAGCCCATTTGAGCATCTGTATGAACTCTCCTTTTTATTAGGCCCCAGT  
 CTTATTCCAGACACCAGCCCAACTTGGACTGTGCCCCAAAAACTTGTATCCCTACTCTCTT  
 CTGTCTAGTCATACTCCTATTTGCCATTCTCAAATACTCATAAATGCCCTGCTCTTGTTTACAC  
 TGCCGGTTTACACTGTTTCTCCAAACCATCACAGCTGATATCTCCTGGTGCTAT-CCCAAACCT  
 GCCACTCTTAACTCCCTCTTAAAGTAAATAAATAATCTTTGCTGGCAGGGCTATGCTGAACC  
 TCCTTGGGCAC--TCTAATTGGATGTCCTGGATCCTCCCAATTCTTAGTCCTTTAATACCTGTT  
 TTTCTCCTTCTCTTATTAGACCTTTT-GTCTTCCGTTTAGTTTTTCAATTCATACAAAACCTGC  
 TTCCAGACCATCACCAATCATTCTATATGATAAATGCTCCTTCTAACAACCCCAACAATATCAC  
 CCCTTACCACAAAATCTTCTTCTCAGCTTAATCTCTCCCACTCTGGGTTTCCATGCCACCCCTA  
 ATCCTGCTCGAAGCAGCCCTGAGAAACATCACCCATTATCTCTCCATGCCACCCCTCCAAAAA  
 ATTTTTGC-TGCCCAACACTTCAATACTATTTTGTATTACTTTTCTTATCAATATAAGAAGGC  
 AG-----  
 >Homo\_sapiens-HERVHF\_INT(-)  
 -----ATTGGTGCCGTGACTCGGATTGGGGGA

CCACCCTTGGGAGATCAATCCCCTGTCTCCTGCTCTTTGCTCCATGAGAAAGATCCACCTA  
 TGACCTCGGATCCTCAGACCAACCAGCCCAAGGAACATCTCACCAATTTTAAATCCGGTAA  
 GTGACCTCTCTTTACTCTCTTCTCTAACTTCTCTCACTATCCCTCAACCTCTTTCTCCTTTCAA  
 TCTTGGTGCCACACTTCAATCTCTCCCTTCTGTAAATTCAGTTCCTTTCTTTCTGGTAGA  
 GACAAAGGAGATGCATTTTATCCGTGGACGCAAACTCCAGCACCGGTCACAGACTCGGG  
 AAGACAGTCTTCCCTTGGTGTAAATCACTGCAGGGACGCCTGCCTGATTATTCACCCACAT  
 TTCATTGGTATCTGATCACCGCAGGGACGCCTGCCTTGGTCATTCACTCACATTCCCTTGGT  
 GGCAAGTCAATTGCAGGGACGCCTGCTTTGGCTGCTCACCCACATTGCAGCCCAGGGCTGC  
 TCACCCAC-----CCATTCTCTCCATGCCTCTA  
 CTCTCTCTTTTCTCTCCACTTTCCTGGGGGGCAAGCACCTCCCACCCCTTTTCCACTTTCCT  
 GGGGGACAAGCACCTCCCACCC-----CTTCTCTCTGTGTCTCTACCC-----  
 -----TCTCTTTTCTCTGAACTCGCCTCCTTCACTATAGGCAACCTTC--CACCT  
 CCATTCTCCTTCTTCTCCCTTAGCCTGTGTTCTCAAGAACTTAAACCTCTTCGACTCACA  
 CCTGACCTAAACCTAAATGCCTTATTTTCTTCTGCAACACCGCTTGACCCC--AATACAAA  
 TCGAC-AATGGTTCCAAATAGCCGAAAACAGCACTTCTATCTCTCCATCCTATAAGATCTG  
 GATAATTCTTGGTGAAAATGGGCAAATGGTCTGAGGTGCCTGATGTCCAGGCATTGTTTTA  
 CACATTGGTCCCTCCCTGGTCTCTGTTCCCAATGCAACTGTCCC-----  
 -----AAATCTTCCTTCTTTCCCTCCCACCTGTCCCCTCAGTCCCGACCCCAAGTGTGCT  
 GAGTCTTTCAA--TCTTCCTTTTTATGGACCCATCTGACCTCTCCCCTCCTCCCCAGGCTGC  
 TCTCGCCAGGCCAAGCCAGGTCCCAA-TTCTTCCTCGGCCTCCGCTCCCCAACCCCTATAAT  
 CCTTTTATCACCTCCCCTCCTCACACCCAGTCCCGCTTATAGTTTTGTTCTGCCACTAGCCCT  
 CCCCTACCTGCCCAGCAATTCCTCTTAAAAAGGTGG-----CTGGAGCTGAAGGCATAGTCA  
 AGGTGAATGCTCCTTTTTCTTTATCCGGCCTCTCCCAAATCAGTTAGCGCTTAGGCTCTTTT-  
 ATCAAATATAAATACCCAGCCAGTTCATGGCTTGTGGCAGCAATCCTGAGACGCTTTAC  
 AGCCCTAGACCCTAAAAGGTCAAAAGCCCATCTTATCCTCAAAATACAT--TTTATTACCCAA  
 TCTGCTCCCGACATTAAATAAACTCCAAAAATTAAATTCAGCCCTCAAACCCACACAT  
 GACTTAATTAACCTTGCCTTCAGGGTGTACAATAATAGAGAAGAGTTGCAATTACTTGCCTC  
 TGCTGTGAGAGAAACCCAGCCACATCTCCAGCACACAAGGACTTCAAAACGCCTAAGCC  
 ACAGCGGCCAGGCATTCCTTCAGGACTTCCTCCCCCAGGATCTTGCTTCAAGTGCTGGAAA  
 TCTGGCCACCGGGCCAAGGAATGCCCGCAGCCAGGATTCC-TCCTAAGCCGTGTCCCATCT  
 GTGTGGGACCCAGTGGAACCTGGACTGTCCAACCTGGCCTAAGGCTCTGACTAGCTCCTTC  
 CCAGATCTTCTTGGCTTAGCGGCTGAAGACTGACGCTGCCCAATCACCTTAGAAGCTTCCT  
 GGACCATCACAGAAGCTCTAGGTAACCTTACAGTGGAGGGTAAGTCTGTCCCTTCTTAAT  
 CAATACAGAGGCTACGTACTCCACATTACCTTCTTTTCAAGGGCCCGTTTCCCTTGCCTCCAT  
 AACTGTTGTGGGTATTGGCAGCCAGGCTTCTAAACCCCTTAAGACTCCCCCACTCTGGTGCT  
 AACTTGGACAACATTCTTTTATGCATTCTTTTTTAGTTATCCCTACCTGCCAGTTCTCTTATT  
 AGGCTGAGACATTTTAACTGAATTATCTGCTTCCCTGACTATTCCCTGGACTACAGCCACATCT  
 CATTGCCACCCCTTCTTCCCAACCCAAAGCCTCCTTCATGCCTTCTTCTCATATCCCCCACCT  
 TAACCCACAAGTATGGGACACCTCTA---CTCCCTCCCTGGCAACTGATCACCAGCCCATT---A  
 TCCCATTAACCTAATCAACCTTACCCTGCTCAACACTAGTATCCCATCCCACAACAGGCT  
 TTAAGGGGACTGAAGCCTGTGATGACTCACCTGCTACAGCATGGGCTTCTAAACCTATAA  
 ACTCTCCTTACAATTCCCCCATTTTACCTGTCCAAAAACCAGACAAGCCTTACAGGTTAGTT  
 CAGGATCCGCACCTTATCAACCAATTGTTTTGCCTATCCCCCATGGTGCCAAACCCATAT  
 ACTCTCCTATCCTCAATACCTCCCTCCACAACCCGTTATTCTGTTCTGGATCTCAAACATGCT



TTCTTTACTATTCCTTTGCACCCTTCATCCCAGTCTTTCTTCGCTTTCACTTGGACTGACCCT  
 GACACCCATCAGGCTCAGCAAATTACCTGGGCTGTACTCCCGCAAGGCTTCACAGACAGCC  
 CCCATTACTTCAGTCAAGCCCAAATTTCTTCCTCATGTGTTACCTATCTCGACATAGTTC-TCA  
 TAAAAACACAC--GTGCTCTCCCTGCTGATCGTGTCCAGCTAATCTCCCAAACCCTGACCCCT  
 TCTACAAAATGACAACTCCTTTCCCTTCTAGGCATGGTTAGGTACTTCCACCTTTGGATACCT  
 CGTTTTTCCATCCTGACTAAACCATTATATAAACTCACAAAAGCAAACCTGGCTGACCCAC  
 AGATCCCAAATCCTTTGCGCACTCCTTTCCATTCTTAAAAACAGCCCTAGAAGCTGCTCCC  
 AACTAGCTCTCCCTAACTCATCCCAACCC-TTTTTTCTTA-ACACAGCTGAAGTGCAGGGCT  
 GTGCAGTCAAAATTCTTACACAAGGACTGGGACCATGCCCTGTGGCCTCTTTATCCAAACA  
 ACTTGACTTTTACTGTTTTAGCCTAGTCCTCATGTCTGTGTGCGGTGGCTGCCGCTGCCTTAAT  
 ACTTTTAGAGGTCCTAAAAATCACAACTATGCTCAACTCTCTACAGTCACTCTCTACAGTT  
 CTCATAACTTCCAAAATCTATTTTCTTCCTCACACCTGACACATATACTTTCTGCT---CCCCTC  
 CACTACCTCTCAGCAAGCCAAACTCATTTCCTTAACTCAAGCCCT-ACTCTTGCAAAAGGAC  
 TACTTGTCATATTTTATACTGACTCTAACTATGCCTTCCATATCCTGCCCCACCATGCTGTTATA  
 TGGGCAGAAAGAAATTTCTTCACTACACAAGGGTCTCCATCATTAAATGCCTCTTTAATAAA  
 AACTCTTCTCAAAGCCGCTTTACTTCCAAAGGAAGCTGGAGTCATTCACTGCAAGGGCCAT  
 CAAAAGGCATCAGATCCCATTGCTCAGGGCAACGCTTATGCTGATAAGGTAGCTAAAGAAG  
 CAGCTAGCGTTCCAATTCTCTCCCTCATGGCAGTTTTTTCTCCTTCTCATC-GGTCACCTCCA  
 CTTACTCCCCTACTGAACTTCCACCTATCAATCTCTTCCCACACAAGGCAAATGGTTCTTG  
 GACCAAGGAACATATCTCCTTCCAGCCTCACAGGCCATTCTATTCTGTGCTCATTTTCATAAC  
 CTCTTCCATGTAGGTTATAAGCTGCTAGTCTGCCTCTTAGAACCTCTCATTTCTTTCCATCG  
 TGGAAATCTATCCTCAAGGAAATCACTTCTCAG-TGTTCCATCTGCTGTTCTACTACTCCTCA  
 GGGATTGTTCAAGGGCCCCCTCCCTTCCCTACACATCAAGCTCGGGGATTTGCCCTTGCCAGG  
 ACTGGCAAATTGACTTTTACTCACATGCCCTGAGTCAGGAACTAAAATACGTCTCGGTCTAG  
 ATAGACACTTTCACTGGATGGGTAGAGGCCTTTCCCACAGGGTCTGAGAAGGCCACCGCAG  
 TCATTTCTTCCCTTCTGTGACACATAATCCTCAGTTTGGCCTTCTACCTCTATACCGTCCAA  
 TAACGGACCGGCCTTTATTAGTCAAATCACCCAAGCAGTTTCTCAGGCTCTTGG---TATTAG  
 TGGAACCTTCATACCCCTTACCATCCTCAATCTTCAGGAAAGGTAGAATGGAACAGACTAAT  
 GGTCTTTTAAAAACACACCTCCCCGAGCTCAGCCACCAACTTAAAAAGGACTAGACAATAC  
 TTTTACCACCTTTCCCTTCTCAAAATTCGGGCGTGTCTTGAATGCTACAGGGTACAGCCCA  
 TTTGAGCTCCTATATAGACACTCCTTTTTATTAGGCCCCAGTCTTATTCCAGACAGCAGCCCA  
 ACTTGGACTGTGCCCCAAAACTTGTATCTGTACTATCTTCTGCCTAGTCATACTCTTATTC  
 ACTGTTCTCAACTACTCATAAATGCCCTGCTCTTGTTTACACTGCCGGTTTACACTGTTTCTC  
 CAGGCCATCACAGCTGATATCTCCTGGTGCTATCCCCAAACCACCACTCTTAACTCCCTCTT  
 AAAGTAAATCAATAATCTTTGCTGGCAGGGCTATGCTGAACCTCCTTGGGCACTCTCTAATT  
 GGATGTCCTGTGTCCTCCCAATTCGTAGTCCTTTAATACCAGTTTTTCTCCTTCTCTTATTTCG  
 ACCTTGT-GTCTTCCGCTTAGTTTTTCAATTCATACAAAACAACATCCAGGCCATCACCAATT  
 ATTCTATATGACAAATGCTCCTTCTAACAACCCTGCAATATCACCCCTTACCACGAAATCTTC  
 CTTAGCTGAATCTCTCCCACTCTGGGTTCCCACGCCACCCCTAATCCCGCTTGAAGCAGCC  
 CTGAGAAACATCGCCATTATCTCTCCATGCCACCCCCC-AAAATTTTAC-TGCCCCAACA  
 CTTCAATACTATTTTATGTTATTTTTCTTATTAATATAAGAAGGCAG-----  
 ---

>Lophocebus\_aterimus-HERVHF\_INT(-)

-----GCTAGTGAAATTTGGTGCCATGACTCAGACTGG

GGGACCTCCCTTGGGAGATCAATCCCCTGTCCTCCTGCTCTTTGCTCCATGAGAAAGATCCA  
CTTACGACCTCAGGTCCTCAGACCAACCAGCCCCAAGAACATCTCACCAATTTTAAACCGG  
GTAAGCAGCCTCTCTTTACTCTCTTCTCCAACCTCTCTCTACTATCCCTCAACCTCTTTCTCCT  
TTCAATCTTGGTGCCACACTTCAATCTCTCCCTTCTCTTAATTTTCAGTTCCTTTCTTTTCTG  
TAGAGGCAGAGGAGACGCGTTTTATCCGTGAACCCAAAACCTCCTGCACCGGTCACCGACTC  
AGGAAGACAGTCTTCCCTTGGTGTTAATCCCTGCAGGGACGTCTGCCTGATTATTCACCCA  
CATTTTCATTGGTGTCTGATCACCACAGGGATGCCTGCCTTCGTCATTACCCACAATCCCTT  
GGTGGCAAGTCCATTGCAGGGACACCTGCTTTGGCTGCTCACCCACATTGCAGCCCAGGGC  
TGCTCACTCCAC-----CCCTTCTCTCCGTGTCT  
CTACCCTCTCTTCTCTCCA-----CTTTCTTGGGGGGCTAGCACCCCC  
CACCC-----CTTCTCTCTGTGTCTCTACCC-----TCTCT  
TTTCTCTGGACTTGCCTCCTTCATTATGGGCAAACCTTCCACACCCTCCATTCTCCTTCTTCT  
CCCTTAGCCTGTGTTCTCAAGAACTTAAACCTCTTCAACTCACAACTGACCTAAAACCTA  
AATGCCTTATTTTCTTCTGCAACACGGCTTGGCCCC--AATACAACTCTAC-AATGGTTCCAA  
ATAGCCAGAAAACGGCACTTTTCGATTCTCCATCCTACAAGATCTAGATAATTCTCGTCATAA  
AATGGGCAAATAGTCTGAGGTGCCTGATGTCCAGGCATTCT-----TGAGTCCCTCCCTGGTC  
TCTGTTCCCAATGCAACTCGTCCC-----AAATCTTCCTTCTTT  
CCCTCCCGCTGTCCCTCAGTCCCAACCCCAAGAGTTGCTGAGTCTTTCTAA--TCTTCCTT  
TTTTACGGACCCATCTGACCTCTCCCCTCCTCCCCAGGCTGCTCCTCACCAGGCCAAGCCA  
GGTCCCAA-TTCTTCCTCAGCCTCCGTTCCCCCACCCTATAATCCTTTTATCACCTCCCCCTCCT  
CACACCCAGTCCGACTTGCAGTTTCGTTTTGCAACTAGCCCTCCCTCACCTGCCCAGCAATT  
ATCTCTTAAAAATGTGGCTGGAGCCTGGAGCCGAAGGCATAGTCAGGGTTAATGCTCCTTTT  
TCTTTATCTGGCCTCTCCCAAATCAGTTAGCGTTTAGGCTCTTTTTTCATCAAATATAAAAACC  
CGGCCCAGTTCATGACTTGTGTTGGCAGCAACCTGAGATGCTTTACTGCCCTAGACCCTGA  
AAGGTCAAAAGGCCGTCTTATTCTCAATATACAT---TGTATTACCCAATCCACTCCTGACATTA  
AATAAAACACCAAAAATTAAGTTCCGGCCCTCAAACCCACAACAAGACTTAATTAACCTT  
GCCTTCAAGGTGTACAATAATAGAGAAGAGTTGCAATTACTTGCCTCCGCTGTGAGAGAAA  
CCCCAGCCACATCTTCAGCACACAAGAACTTCAAATGCCTAAGCCACAGCAGCCAGGCG  
TTCCTTCAGGACTTTCTCCCCAGGATCTTGCTTCAAGTGCTGGAAATCTGGCCACTGGGCC  
AAGGAATGCCCGTAGCCCAGGATTCC-TCCTAAACTGTGTCCCATCTGTGCAGGACCCCACT  
GGAAATTGGACTGTCTAACTGGCCCAAGGCTCTAACTGACTCCTTCCCAGATCTTCTCAGCT  
TA--GGCTGAAGACTGATGCTGCCCCGATCACCTTGGAAGCTTCCTGGACCATCCTAGACGCT  
TTGGGTAACTCTTACAGTGGAGGGTAAGTCCATCCCCTTCTTAATCAATATGGAGACTACCC  
ACTCCACATTACCTTCTTTTCAAGGGCCTGTTCCCTTGCTCCATAAATGTTGTGGGCATTG  
ACAGCCAGGTTTCTAAACCCCTTAAACCTCCCCAGTCTGGTGCTAACTTGGACAACATTCT  
TTTTATGCACTCTTTTTTTCAGTTATCCCCACCTGCCCAGTTCCCTTATTAGGCCAAGATATTTA  
ACCAAATTGTCTGCTTCCCTGACTATTCCCTGGACTACAGCCACATCTCATTGCTACCCTGCTT  
CCCAACCCAAAGCCTCCTTCGCGCCTTCCTCTCGTATTCCCCAACTTAACCCACGTGTATG  
GGACACCTCTA---CTCCCTCCCTGGCAACCAATCACCAGCCTATTACTATCCCATTAACCT  
AATCACCTTACCCCATTCATGCCAGTATCCCATCCCACAACAGGCTTTAAAGGGATTGAA  
ACCTGTTATCACTTGCCTGCTACAGTATGGGCTTCTAAAACCTGTAACTCCCCTTACAATTC  
CCCCATTTTACCTGTCCAAAACTGGACAAGTCTTACAGGTTACTTCAGGATCTGTGCCTTA  
TCAACCAAATTGTTTTGCCTAT--CCTTGTGGTGCGACACCCATTACTCTCCTATCCTCAATA  
CCTCCCTCCACAACCCATTATTCTGTTCTGGATCTCAAACATGCTTTCTTTACTATTCTTTGC

ATCCTTCATCCCAGCCTCTTTTCGCTTTCACCTTGGACTGACCCTGACACCCATCAGGCTCAG  
GAAATTACCTGGGCTGTACTGCTGCAAGGCTTCACGGACAGCCCCTATTACTTCAGTCAAG  
CCCAAATTTCTTCCTCATCTGTTACCTATCTTGGCATAATTC-TCATAAAAACACAC--ATGCTC  
TCCCTGCTGATCATGTCTGGCTAATCTCCCAAACCCCAACCCCTTCTACAAAACAACAACTC  
CTTCCTTC-GTAGGCATGGTTAGCTACTTCCACCTTTGGATACCTAGTTTTACCATCTTGACTA  
AACCACAATGTAAACTCACAAAAGGAAACCTAGCTGACCCACAGATCCTAAATCCTTTTG  
CCACTCCTTTCCATTCCCTTAAAAACAGCCCTAGAAGCTGCTCCCACACTAGCTCTCCCTAAC  
TCATCCCAATCC-TTTTTATTACACACAGTCAAAGTGCAGGGCTGTGAGGTCAAAATTCTT  
ACACAAGGATTGGGACCATGCCCTGTGGCCTTTTTATCCAAACAACCTTGACCTTACTCTTTT  
AGCTTAG-CCTCATGTCTGTGTGTGGCAGCTGCTGCTTCCTTAATACTTTCAGAGGCCCTCAA  
AATCACAAACTATGCTCAAC-----TCACTCTCTAGAGTTCTCATAACTTTCAAAATCTATTTT  
ATTCTCACACGTGATGCACATATTCTGCTGCC---CCCCTCCACTACCTCTCAACAAGCCAAAC  
TCATTGCCTTAACTCAAGCCCTCGCTCTTGCAAAAGGATTACGTGTCAATATTTATACTGACT  
CTAAATATGCCTTCCATATCCTGCACCACCATGCTGTTATATGGGCAGAAAGAAATGTCCTAA  
CTATGCAAGGGTCCCTCCATCATTATGCCTCTTTAATAAAAACCTTCTCAAAGCTGCTTTAC  
TTCCAAAGGAAGCTGGAATCATTCACTGCAAGGGCCATCAAAGGCATCAGATCCCATTGC  
TCAGGACAATGCTTATGCTGATACGGTAGCTAAA-AAGCAGCTAGCATTCCAACCTTCTATCCC  
TCATGGCAGTTTTTTCTCCTTCGCATTTGGCCACTCCCACCTACTCCCCCACTGAAACTTCCA  
CCTATCAGTCTCTTCCCACGCAAGGCAAATGGTTCTTGGACCAAGGAAAATATCTCCTTCCA  
GCCTCACAGGCCCATTTCTATTCTGTGCATATTTTATAACCTCTTCCATGTAGGTTACAAGCTG  
CTAGCCCATCTCTTAGAACCTCTCATTTCCTTTCCATCGTGGAGATCTATCCTCAAGGAAATC  
ACTTCTCAG-TGTTCCATCTGCTATTCTACTACTCCTCAGGGATTGTTTCAAGCCCCCTCCCTT  
CCCTACACGTCAAGCTCGGTGATTTGCCCTGCCCAGGACTGGCAAATTGACTTTACTCACA  
TGCCCCGAGTCAGGAAACTAAAATACCTCTTGGTCTAGGTAGACACTTTCACTGGACAGGT  
AGAGGCCTTTCCCACAGGGTCTGCAAAGGCCACCATGGTCATTTCTTCCCTTCTGTCAGGTA  
TAATTCCTCGGTTTGACCTTCCTACCTCTATACAGTCCAATAATGGACCAGCCTTTGTAGTT  
AAATCACCCAACCAAGTTTCTCAGGCTCTTAG---TATTCAGTGGAACCTTTCATACCCCTTACTA  
TCCTCAGTCTTCAGGAAAGGTA-----GAACGGGCTAATGGTCTTTTAAAAACACACCTCACC  
AATCTCAGCCACCAACTTAAAAAGGACTAGACAATACTTTTACCCTTTCCCTTCTCAAAAT  
TCGGGCCTGTCTCGGGATGCTACAGGGTACAGCCCACTTGAGCTTCTGTATGAACCCTCCT  
ATTTATTAGGCCCCAGTCTTATTCCAGACACCAGCCCACTTGGACTGTGCCCCAAAACTT  
GTCATCCCTACTCTCTTCTGTCTAGTCATACTCCTATTCACTGTTCTCAAATACTCATAAATGC  
CCTGCTCTTGTTTACACTGCCGTTTACACTGTTTCTCCAAGCCATCACAGCTGATATCTCCC  
GGTGCTAT-CCCAAAGTCCACTCTTAACTCCCTCTTAAAGTAAATAAATAATCTTTGCTGGC  
AGGGCTATGCTGAATCTCCTTGGGCACTCTCTAATTGGATGTCCTGGATCCTCCCAATTCTTA  
GTCCTTTAATACCTGTTTTTCTCCTTCTCTTATTACAGACCTTTT-GTCTTCCGTTTAGTTTTTCA  
ATTCATACAAAAGTCTTCCAGGCCATCACCATCATTCTATATGATAAATGCTCCTTCTAAC  
AACCCACAAATAT----CTTACCACAAAATCTTCTTCAGCTTAATCTCTCCCACTCTGGGTTT  
CCATGCCACCCCTAATCCTGCATGAAGCAGCCCTGAGAAACATCGCCATTATCTCTCCATG  
CCACCCCCCAAAAATTTTTGC-TGCCCAACACTTCAATACTATTTTGTATTATTTTTCTTATT  
AATATAAGAAGGCAG-----

>Macaca\_mulatta-HERVHF\_INT(-)

-----GCTAGTGAAATTTGGTGCCGTGACTCAGACTGG  
GGGACCTCCCTTGGGAGATCAATCTCCTGTCCTCTGCTCTTTGCTCCGTGAGAAAGATCCA

CTTACGACCTCAGGTCTCAGACCAACCAGCCCCAAGAACATCTCAGCAATTTTAAATCGG  
 GTAAGCAGCCTCTCTTTACTCTCTTCTCCAACCTCTCTCTACTATCCCTCAACCTCTTTCTCCT  
 TTCAATCTTGGTGCCACACTT-AATCTCTCCCTTCTCTTAATTTTCAGTTCCTTTTCTCTGG  
 TAGAGACAGAGGAGACGCGTTTTATCCGTGAACCCAAAACCTCCTGCACCGGTCACCGACTT  
 GGGAAGACAGTCTTCCCTTGGTGTTAATCCCTGCAGGGACGTCTGCCTGATTATTCACCCA  
 CATTTTCATTGGTGTCTGATCACCACAGGGATGCCTGCCTTCGTCATTACCCACAATCCCTT  
 GGTGGCAAGTCCATTGCAGGGACACCTGCTTTGGCTGCTCACCCACATTGCAGCCCAGGGC  
 TGCTCACCCAC-----CCCTTCTCTCCGTGTCT  
 CTACCTCTCTTCTCTCCA-----CTTTCTTGGGGG-CTAGCACCCCC  
 CACCC-----CTTCTCTCTGTGTCTCTACCC-----TCTCT  
 TTTCTCTGGACTTGCCTCCTTCATTATGGGCAAACCTTCCACACCCTCCATTCTCTCTTCT  
 CCCTTAGCCTGTGTTCTCAAGAACTTAAAACCTCTTCAACTCACAACCTGACCTAAACCTA  
 AATGCCTTATTTCTTCTGCAACACGGCTTGGCCCC--AATACAACTCGAC-AATGGTTCCA  
 AATAGCCAGAAAACAGCACTTTCGATTTCTCCATCCTACAAGATCTAGATAATTCTCGTCATA  
 AAATGGGCAAATAGTCTGAGGTGCCTGATGTCCAGGCATTCTTTACACATGAGTCCCTCCC  
 TAGTCTCTGTTCCCAATGCAACTCGTCCC-----AAATCTTCCT  
 TCTTTCCCTCCCGCTGTCCCCTCAGTCCCAACCCCAAGAGGTGCTGAGTCTTTCTAA--TCT  
 TCCTTTTTTACGGACCCATCTGACCTCTCCCTCTTCCCCAGGCTGCTCCTCGCCAGGCCAA  
 ACCAGGTCCCAA-TTCTTCCTCAGCCTCCGTTCCTCCACCTATAATCCTTTTATCACCTCCC  
 CTCTCACACCCAGTCCGACTTGCAGTTTCGTTTTGCAACTAGCCCTGCCCCACCTGCCCCA  
 GCAATTATCTCTTAAAAATGTGG-----CTGGAGCTGAAGGCATAGTCAGGGTTAATGCTCCTT  
 TTTCTTTATCTGGCCTCTCCCAAATCAGTTAGCGTTTAGGCTCTTTTTTCATCAAATATAAAAA  
 CCCAGCCCAGTTCATGGCTTGTTTGGCAGCAACCTGAGATGCTTTACTGCCCTAGACCCTG  
 GAAGGTCAAAAGGCCGTCTTATTCTCAATATACAT---TGTATTACCCAATCCACTCCTGACATT  
 AAATAAACACCAAAAATTAAGTTCCGGCCCTCAAACCTCACAACAAGACTTAATTAACCT  
 TGCCTTCAAGGTTTACAATAATAGAGAAGAGTTGCAATTACTTGCCTCCACTGTGAGAGAA  
 ACCCCAGCCACATCTTCAGCACACAACAACCTTCAAATGCCTAAGCCACAGCAGCCAGGT  
 GTTCCTTCAGGACTTTCTCCCCAGGATCTTGCTTCAAGTGCTGGAAATCTGGCCACTGCGC  
 CAAGGAATGCCCCGTAGCCCAGGATTCC-TCCTAAACTGTGTCCCATCTGTGCGTGACCCAC  
 TGGAAACTGGACTGTCCAACCTGGCCCAAGGCTGTGACTGACTCCTTCCCAGATCTTCTCAG  
 CTTA--GGCTGAAGACTGATGCTGCCCCATCGCTTGGAAAGCTTCCTGGACCATCCCAGACG  
 CTTTGGGTAACCTCTTACAGTGGATGGTAAGTCCATCCCCCTCTTAATCAATATGGAGGCTACC  
 CACTCCACATTACCTTCTTTTCAAGGGCCTGTTTCCCTTGCTTCCAAAAATGTTGTGGGCAT  
 TGACAGCCAGGTTTCTAAACCCCTTAAAACCTCCCCAGTCTGGTGCTAACTTGGACAACAT  
 TCTTTTATGCACTCTTTTTTCAGTTATCCCCACCTGCCAGTTCCCTTATTAGGCCAAGATATT  
 TAACCAAATTGTCTGCTTCCCTGACTATTCTTGACTACAGCCACATCTCATTGCTACCCTGC  
 TTCCCAACCCAAAGCCTCCTTCACGCCTTCTCTCGTATTCCCCGAACCTTAACCCACGTGTA  
 TGGGACACCTCTACTCCTCCCTCCCTGGCAACCAATCACCAGCCTATTACTATCCATTAAA  
 ACCTAATCACCTTACCCATTCAATGCCAGTATCCCATCCCACAACAGGCTTTAAAGGGAT  
 TGAAACCTGTTATCACTCGCTGCTACAGTATGGGCTTCTAAAACCTGTAAACTCCCCTTAC  
 AATCCCCCATTTTACCTGTCCAAAAACTGGACAAGTCTTACAGGGCACTTCAGGATCTGTG  
 CCTTATCAACCAAATTGTTTTGCCTAT--CCTTGTGGTGCGACACCCATTATTCTCCTATCCT  
 CAATACCTCCCTCCACAACCCATTATTCTGTTCTGGATCTCAAACATGCTTTTTTTTACTATTCC  
 TTTGCATCCTTCATCCAGCCTCTTTTCGCTTTCACCTGGACTGACCCTGACACCCATCAGG

CTCAGGAAATTACCTGGGCTGTACTGCTGCAAGGCTTCACGGACAGCCCCTATTACTTCAGT  
CAAGCCCAAATTTCTTCCTCATCTGTTACCTATCTTGGCATAATTC-TCATAAAAACACAC--G  
TGCTCTCCCTGCTGATCATGTCTGGCTAATCTCCCAAACCCCAACCCCTTCTACAAAACAAC  
AACTCCTTCCTTC-GTAGGCATGGTTAGCTACTTCCACCTTTGGATACCTAGTTTTTACCATCTT  
GACTAAACCACGATGTAAACTCACAAAAGGAAACCTAGCTGACCCACAGATCCTAAATCC  
TTTTGCCACTCCTTTCCATTCTTAAAAACAGCCCTAGAAGCTGCTCCACACTAGCTCTCC  
CTAACTCATCCCAATCC-TTTTTCATTACACACAGTCAAAGTGCAGGGCTGTGAGGTCAAAA  
TTCTTACACAAGGATCGGGACCATGCCCTGTGGCCTTTTTATCCAAACAACCTTGACCTTACT  
CTTTTAGCTTAG-CCTCATGTCTGTGTGTGGCAGCTGCTGCTTCCTTAATACTTTCAGAGGCC  
CTCAAATCACAACTATGCTCAAC-----TCACTCTCTAGAGTTCTCATAACTTCCAAAATC  
TATTTTCTTCCTCACACCTGATGCACATATTTCCTGCC---CCCTCCACTACCTCTCAACAAG  
CCAAACTCATTGCCTTAACTCAAGCCCTTGCTCTTGCAAAAGGATTAAGTGTCAATATTTATA  
CTGACTCTAAATATGCCTTCCATATCCTGCACCACCATGCTGTTATATGGGCAGAAAGAAATG  
TCCTAACTATGCAAGGGTCCTCCATCATTAATGCCTCTTTAATAAAAACTCTTCTCAAAGCTG  
CTTTACTTCCAAAGGAAGCTGGAATCATTCACTGCAAGGGCCATCAAAGGCATCAGATCC  
CATTGCTCAGGACAATGCTTATGCTGATACAGTAGCTAAA-AAGCAGCTAGCATTCCAACCTT  
CTATCCCTCACGGCAGTTTTTCTCCTTTGCATTTGGCCACTCCACCTACTCCCCCACTGAA  
ACTTCCACCTATCAGTCTCTTCCAACGCAAGGCAAATGGTTCTTGACCAAGGAAAATCTC  
TCCTTCCAGCCTCACAGGCCCATTTCTATTCTGTCATCATTTTCATAACCTCTTCCATGTAGGTTA  
CAAGCTGCTAGCCCATCTCTTAGAACCTCTCATTTCCTTTCCATCGTGGAGATCTATCCTCAA  
GGAAATCACTTCTCAG-TGTTCCATCTGCTATTCTACTACTCCTCAGGGATTGTTTCAGGCCCC  
CTCCCTTCCCTACACATCAAGCTCGGTGATTGCCCCCTGCCAGGACTGGCAAATTGACTTT  
ACTCACATGCCCCGAGTCAGGAACTAAAATACCTCTTGGTCTAGGTAGACACTTTCACTG  
GATGGGTAGAGGCCTTTCCACAGGGTCTGCGAAGGCCACCATGGTCATTTCTTCCCTTCTG  
TCAGGTATAATTCTCGTTTTGACCTTCCTACCTCTATACAGTCCAATAATGGACCAGCCTTT  
GTTAGTTAAATCACCCAACCAAGTTTCTCAGGCTCTTAG---TATTCACTGGAACCTTTCATACCC  
CTTACCATCCTCAGTCTTCAGGAAAGGTA-----GAACGGGCTAATGGTCTTTTAAAAACACAC  
CTCACCAATCTCAGCCACCAACTTAAAAAGGACTAGACAATACTTTTACCCTTTCCCTTCT  
CAAAATTCGGGCCTGTCCTCGGGATGCTACAGGGTACAGCCCATTTGAGCTTCTGTATGAAC  
CCTCCTATTTATTAGGCCCCAGTCTTATTCCAGACACCAGCCCAACTTGGACTGTGCCCCAA  
AACTTGTATCCCTACTCTCTTCTGTCTAGTCATACTCCTATTACCATTTCTCAAATACTCAT  
AAATGCCCTGCTCTTGTTTACACTGCCGGTTTACACTGTTTCTCCAAGCCATCACAGCTGAT  
ATCTCCTGGTGCTAT-CCCAAAGTCCACTCTTAACTCCCTCTTAAAGTAAATAAATAATCTTT  
GCTGGCAGGGCTATGCTGAACCTCCTTGGGCACTCTCTAATTGGATGTCCTGGATCCTCCCA  
ATTCTTAGTCCTTTAATACCTGTTTTTCTCCTTCTCTTATTACAGACCTTTT-GTCTTCCGTTTAG  
TTTTTCAATTCATACAAAACCTGCTTCCAGGCCATCACCAATCATTCTATATGATAAATGCTCCT  
TCTAACAAACCCCAACAATATCACCCCTTACCACAAAATCTTCCTTCAGCTTAATCTCTCCCACT  
CTGGGTTTTCCATGCCACCCCTAATCCTGCATGAAGCAGCCCTGAGAAACATCACCCATTATC  
TCTCCATGCCACCCCCCAAAAAATTTTTGC-TGCCCCAACACTTCAATACTATTTTGTATTATT  
TTTCTCATTAATATAAGAAGGCAG-----

>Macaca\_silenus-HERVHF\_INT(+)

-----CTAGTGAAATTTGGTGCCGTGACTCAGACTGG  
GGGACCTCCCTTGGGAGATCAATCTCCTGTCTCCTGCTCTTTGCTCCGTGAGAAAGATCCA  
CTTACGACCTCAGGTCTCAGACCAACCAGCCCCAAGAACATCTCACCAATTTTAAATCGG

GTAAGCAGCCTCTCTTTACTCTCTTCTCCAACCTCTCTCACTATCCCTCTACCTCTTTCTCCTT  
 TCAATCTTGGTGCCACACTT-AATCTCTCCCTTCTCTTAATTTTCAGTTCCTTTCTCTTTCTGGT  
 AGAGACAGAGGAGACGCGTTTTATCCGTGAACCCAAAACCTCCTGCACCGGTTCATCGACTC  
 GGAAGACAGTCTTCCCTTGGTGTTAATCCCTGCAGGGACGTCTGCCTGATTATTCACCCA  
 CATTTTCATTGGTGTCTGATCACCACAGGGATGCCTGCCTTCGTCATTACCCACAATCCCTT  
 GGTGGCAAGTCCATTGCAGGGACACCTGCTTTGGCTGCTCACCCACATTGCAGCCCAGGGC  
 TGCTCACCCAC-----CCCTTCTCTCCGTGTCT  
 CTACCCTCTCTTCTCTCCA-----CTTTCTTGGGGGGCTAGCACCCCC  
 CACCC-----CTTCTCTCTGTGTCTCTACCC-----TCTCT  
 TTTCTCTGGACTTGCCTCCTTCATTATGGGCAAACCTTCCACACCCTCCATTCCCTCCTTCTTCT  
 CCCTTAGCCTGTGTTCTCAAGAACTTAAACCTCTTCAACTCACAACTGACCTAAACCTA  
 AATGCCTTATTTTCTTCTGCAACACGGCTTGGCCCC--AATACAACTCGAC-AATGGTTCCA  
 AATAGCCAGAAAACAGCACTTTCGATTTCTCCATCCTACAAGATCTAGATAATTCTCGTCATA  
 AAATGGGCAAATAGTCTGAGGTGCCTGATGTCCAGGCATTCTTTTACACATGAGTCCCTCCC  
 TAGTCTCTGTTCCCAATGCAACTCGTCCC-----AAATCTTCCT  
 TCTTTCCCTCCCGCCTGTCCCCTCAGTCCCAACCCCAAGAGGTGCTGAGTCTTTCTAA--TCT  
 TCCTTTTTTACGGACCCATCTGACCTCTCCCCTCCTCCCCAGGCTGCTCCTCGCCAGGCCAA  
 GCCAGGTCCCAA-TTCTTCCTCAGCCTCCGTTCCCCCACCCTATAATCCTTTTATCACCTCCC  
 CTCCTCACACCCAGTCCGACTTGCAGCTTCGTTTTGCAACTAGCCCTCCCCACCTGCCCA  
 GCAATTATCTCTTAAAAATGTGG-----CTGGAGCTGAAGGCATAGTCAGGGTTAATGCTCCTT  
 TTTCTTTATCTGGCCTCTCCCAAATCAGTTAGCGTTTAGGCTCTTTTTTCATCAAATATAAAAA  
 CCCAGCCCAGTTCATGGCTTGTGGCAGCAACCCTGAGATGCTTTACTGCCCTAGACCTTG  
 GAAGGTCAAAAGGCCATCTTATTCTCAATATACAT--TGTATTACCCAATCCACTCCTGACATT  
 AAATAAACACCAAAAAATTAAGTTCCGGCCCTCAAACCTCACAAACAAGACTTAATTAACCT  
 TGCCTTCAAGGTTTACAATAATAGAGAAGAGTTGCAATTACTTGCCTCCACTGTGAGAGAA  
 ACCCCAGCCACATCTTACGACACACAACCTTCAAAATGCCTAAGCCACAGCAGCCAGGT  
 GTTCCTTACAGGACTTTCTCCCCCAGGATCTTGCTTCAAGTGCTGGAAATCTGGCCACTGGGC  
 CAAGGAATGCCCCGTAGCCCAGGATTCC-TCCTAAACTGTGTCCCATCTGTGCGGGACCCAC  
 TGGAACCTGGACTGTCCAACCTGGCCCAAGGCTGTGACTGACTCCTTCCCAGATCTTCTCAG  
 CTTA--GGCTGAAGACTGATGCTGCCCCGATCGCCTTGGAAGCTTCCTGGACCATCCCAGACG  
 CTTTGGGTAACCTCTTACAGTGGATGGTAAGTCCATCCCCCTTCTTAATCAATATGGAGGCTACC  
 CACTCCACATTACCTTCTTTTCAAGGGCCTGTTTCCCTTGCCTCCATAAATGTTGTGGGCATT  
 GACAGCCAGGTTTCTAAACCCCTTAAACCTCCCCCAGTCTGGTGCTAACTTGGACAACATT  
 CTTTTATGCACTCTTTTTTCAAGTTATCCCCACCTGCCAGTTCCTTATTAGGCCGAGATATTT  
 AACCAAATTGTCTGCTTCCCTGACTATTCTGGACTACAGCCACATCTCATTGCTACCCTGCT  
 TCCCAACCCAAAGCCTCCTTCGCGCCTTCCTCTCGTATTCCCCGAACCTTAACCCACGTGTAT  
 GGGACACCTCTA---CTCCCTCCCTGGCAACCAATCACCAGCCTATTACTATCCCATTAAACCC  
 TAATCACCTTACCCCATTCATGCCAGTATCCCATCCCACAACAGGCTTTAAAGGGATTGA  
 AACCTGTTATCACTCACCTGCTACAGTATGGGCTTCTAAACCTGTAAACTCCCCTTACAATT  
 CCCCCATTTTACCTGTCCAAAAACTGGACAAGTCTTACAGGGTACTTCAGGATCTGTGCCCT  
 ATCAACCAAATTGTTTTGCCTAT--CCTTGTGGTGCGACACCCATTTACTCTCCTATCCTCAAT  
 ACCTCCCTCCACAACCCATTATTCTGTTCTGGATCTCAAACATGCTTTCTTTACTATTCCCTTG  
 CATCCTTCATCCCAGCCTCTTTTCGCTTTCCTTGGACTGACCCTGACACCCATCAGGCTCA  
 GGAAATTACCTGGGCTGTACTGCTGCAAGGCTTCATGGACAGCCCCTATTACTTCAGTCAAG

CCCAAATTTCTTCCTCATCTGTTACCTATCTTGGCATAATTC-TCATAAAAAACACAC--GTGCTC  
 TCCCTGCTGATCATGTCTGGCTAATCTCCCAAACCCCAACCCCTTCTACAAAACAACAACTC  
 CTTCCCTC-GTAGGCATGGTTAGCTACTTCCACCTTTGGATACCTAGTTTTACCATCTTGACTA  
 AACCACGATGTAACTCACAAAAGGAAACCTAGCTGACCCACAGATCCTAAATCCTTTTG  
 CCACTCCTTTCCATTCTTAAAAACAGCCCTAGAAGCTGCTCCCACACTAGCTCTCCCTAAC  
 TCATCCCAATCC-TTTTTATTACACACAGTCAAAGTGCAGGGCTGTGAGGTCAAAATCTT  
 ACACAAGGATCGGGACCATGCCCTGTGGCCTTTTTATCCAAACAACCTTGACCTTACTCTTTT  
 AGCTTAG-CCTCATGTCTGTGTGTGGCAGCTGCTGCTTCCTTGATACTTTCAGAGGGCCCTCA  
 AAATCACAACTATGCTCAAC-----TCACTCTCTAGAGTTCTCATAACTTCCAAAATCTATT  
 TTCTTCCTCACACCTGATGCACATATTTCCTGCC---CCCCTCCACTACCTCTCAACAAGCCAA  
 ACTCATTGCCTTAACTCAAGCCCTCGCTCTTGCAAAAGGATTAAGTGTCAATATTTATACTGA  
 CTCTAAATATGCCTTCCATATCCTGCACCACCATGCTGTTATATGGGCAGAAAGAAATGTCCT  
 AACTATGCAAGGGTCTCCATCATTAATGCCTCTTTAATAAAAACTCTTCTCAAAGCTGCTTT  
 ACTTCCAAAGGAAGCTGGAATCATTCACTGCAAGGGCCATCAAAGGCATCAGATCCATT  
 GCTCAGAACAATGCTTATGCTGATACGGTAGCTAAA-AAGCAGCTAGCATTCCAACCTCTATC  
 CCTCACGGCAGTTTTTCTCCTTCGCATTTGGCCACTCCCACCTACTCCCCCACTGAAACTTC  
 CACCTATCAGTCTCTTCCCACGCAAGGCAAATGGTTCCTTGGACCAAGGAAAATCTCTCCTTC  
 CAGCCTCACAGGGCCATTCTATTCTGTTCATCATTTTCATAACCTCTTCCATGTAGGTTACAAGC  
 TGCTAGCCCATCTCTTAGAACCTCTCATTTCTTTCCATCGTGGAGATCTATCCTCAAGGAAA  
 TCACTTCTCAG-TGTTCCATCTGCTATTCTACTACTCCTCAGGGATTGTTTCAGGCCCCCTCCC  
 TTCCCTACACATCAAGCTCGGTGATTTGCCCTGCCAGGACTGGCAAATTGACTTTACTCA  
 CATGCCCTGAGTCAGGAACTAAAATACCTCTTGGTCTAGGTAGACACTTTCCTGAGTGG  
 GTAGAGGCCTTTCCCACAGGGTCTGCGAAGGCCACCATGGTCATTTCTTCCCTTCTGTGAG  
 GTATAATTCCTCGGTTTGACCTTCTACCTCTATACAGTCCAATAATGGACCAGCCTTTGTTA  
 GTTGAATCACCCAACCAGTTTCTCAGGCTCTTAG---TATTCAAGTGGAACCTTCATACCCCTTA  
 CCATCCTCAGTCTTCAGGAAAGGTA----GAATGGGCTAATGGTCTTTTAAAAACACACTTCA  
 CCAATCTCAGCCACCAACTTAAAAAGGACTAGACAATACTTTTACCCTTTCCCTTCTCAAA  
 ATTCGGGCCTGTCTCGGGATGCTACAGGGTACAGTCCATTTGAGCTTCTGTATGAACCCTC  
 CTATTTATTAGGCCCCAGTCTTATTCCAGACACCAGCCCAACTTGGACTGTGCCCCAAAAAC  
 TTGTCATCCCTACTCTCTTCTGTCTAGTCATACTCCTATTACCGTTCTCAAATACTCATAAAT  
 GCCCTGCTCTTGTTTACACTGCCGTTTACACTGTTTCTCCAAGCCATCACAGCTGATATCTC  
 CTGATGCTAT-CCCAAAGTCCACTCTTAACTCCCTCTTAAAGTAAATAAATAATCTTTGCTG  
 GCAGGGCTATGCTGAACCTCCTTGGGCACTCTTAATTGGATGTCCTGGATCCTCCCAATTC  
 TTAGTCCTTTAATACCTGTTTTTCTCCTTCTCTTATTTCAGACCTTTT-GTCTTCCGTTTAGTTTT  
 TCAATTCATACGAACTGCTTCCAGGCCATCACCAATCATTCTATATGATAAATGCTCCTTCT  
 AACAACCCACAAATATCACCCCTTACCACAAAATCTTCCTTCAGCTTAATCTCTCCCACTCT  
 GGGTTTCCATGCCACCCCTAATCCTGCATGAAGCAGCCCTGAGAAACATCACCCATTATCTC  
 TCCATGCCACCCCCCAAAAAATTTTTGC-TGCCCAACACTTCAATACTATTTTGTATTATTTT  
 TCTTATTAATATAAGAAGGCAGG-----

>Mandrillus\_leucophaeus-HERVHF\_INT(+)

-----CTAGTGAAATTTGGTGCCGTGACTCAGACTGG  
 GGGACCTCCCTTGGGAGATCAATCCCCTGTCCTCCTGCTCTTTGCTCCGTGAGAAAGATCCA  
 CTTACGACCTCAGGTCTCAGACCAACCAGCCCTAAGAACATCTCACCAATTTTAAATTGG  
 GTAAGCAGCCTCTCTTTACTCTCTTCTCCAACCTCTCTCACTATCCCTCAACCTCTTTCTCCT

TTCAATCTTGGTGCCACACTTCAATCTCTCCCTTCTCTTAATTTTCAGTTCCTTTCTTTTCTGG  
 TAGAGACAGAGGAGACGCATTTTATCCGTGAACCCAAAACCTCCTGCACCGGTCACCGACTC  
 GGAAGACAGTCTTCCCTTGGTGTTTAAATCCCTGCAGGGACATCTGCCTGATTATTCACCCA  
 CATTTTCATTGGTGTCTGATCACCACAGGGATGCCTGCCTTCGTCATTACCCACAATCCCTT  
 GGTGGCAAGTCCATTGCAGGGACACCTGCTTTGGCTGCTCACCCACATTGCAGCCCAGGGC  
 TGCTCACCCAC-----CCCTTCTCTCCGTGTCT  
 CTACCCTCTCTTCTCTCCA-----CTTTCTTGGGGGGCTAGCA-CCCT  
 CACCC-----CTTCTCTCTGTGTCTCTACCC-----TCTCT  
 TTTCTCTGGACTTGCCTCCTTCATTATGGACAAACTTCCACACCCTCCATTCCCTCCTTCTTCT  
 CCCTTAGCCTGTGTTCTCAAGAACTTAAACCTCTTCAACTCACAAGTACCTAAAACCTA  
 AATGCCTTATTTTCTTCTGCAACACGGCTTGGCCCC--AATACAAACTCGAC-AATGGTTCCA  
 AATAGCCAGAAAACGGCACTTTTCGATTTCTCCATCCTGCAAGATCTAGATAATTCTCGTCATA  
 AAATGGGCAAATAGTCTGAGGTGCCTGATGTCCAGGCATTCTTTTACACATGAGTCCCTCCC  
 TGGTCTCTGTTCCCAATGCAACTCGTCCC-----AAATCTTCCCT  
 TCTTTCCCTCCCGCCTGTCCCCTCAGTCCCAACCCCAAGAGTTGCTGAGTCTTTCTAA--TCT  
 TCCTTTTTTATGGACCCATCTGACCTCTCCCCTCCTCCCCAGGCTGCTCCTCACCAGGCTGA  
 GCCAGGTCCCAA-TTCTTCCTCAGCCTCCGTTCCCCCACCCTATAATCCTTTTATCACCTCCC  
 CTCCTCACACTCAGTCCGACTTGCAGTTTCATTTTGCAACTAGCCCTCCCTCACCTGCCAG  
 CAATTATCTCTTAAAAATGTGG-----CTGGAGCCGAAGGCATAGTCAGGGTTAATGCTCCTTT  
 TTCTTTATCCGGCCTCTCCCAAATCAGTTAGCGTTTAGGCTCTTTTTCATCAAATATAAAAAC  
 CCGGCCAGTTCATGGCTTGTGGCAGCAACCCTGAGATGCTTTACTGCCCTAGACCCTGA  
 AAGGTCAAAAGGCCGTCTTATTCTCAATATACAT--TGTATTACCCAATCCACTCCTGACATTA  
 AATAAACACCAAAAATTAAGTTCCGGCCCTCAAACCCACAACAAGACTTAATTAACCTT  
 GCCTTCAAGGTGTACAATAATAGAGAAGAGTTGCAATTACTTGCCTCCGCTGTGAGAGAAA  
 CCCCAGCCACATCTTCAGCACACAAGAACTTCAAATGCCTAAGCCACAGCAGCCAGGCAT  
 TCCTTCAGGACTTTCTCCCCCAGGATCTTGCTTCAAGTGCTGGAAATCTGGCCACTGGGCC  
 AAGGAATGCCCGTAGCCAGGATTCC-TCCTAAACTGTGTCCCATTTGTGCAGGACCCCACT  
 GGAAATTGGACTGTCCAAGTGGCCCAAGGCTCTGACTGACTCCTTCCCAGATCTTCTCAGC  
 TTA--GGCTGAAGACTGATGCTGCCCAGTCGCTTGGAAGCTTCCTGGACCATCCCAGACGC  
 TTTGGGTAAGTCTTACAGTGGAGGGTAAGTCCATCCCCTTCTTAATCAATATGGAGGCTACC  
 CACTCCACATTACCTTCTTTTCAAGGGCCTGTTTCCCTTGCCTCCATAAATGTTGTGGGCATT  
 GACAGCCAGGTTTCTAAACCCCTTAAACCTCCCCAGTCTGGTGCTAACTTGGACAACATT  
 CTTTTATGCACTCTTTTTCAGTTATCCCCACCTGGCCAGTTCCTTATTAGGCTGAGATATTT  
 AACCAAATTGTCTGCTTCCCTGACTATTCTGGACTACAGCCACATCTCATTGCTACCCTGCT  
 TCCCAACCCAAAGCCTCCTTCGTGCCCTCCTCTCGTATTCCCCGAAGTTAACCCACGTGTAT  
 GGGACACCTCTA---CTCCCTCCCTGGCAACCAATCACCAGCCTATTACTATCCCATTAAACC  
 TAATCACCCCTTACCCCATCAATGCCAGTATCCCATCCCACAACAGGCTTTAAAGGGATTGA  
 AACCTGTTATCACTTGCCTGCTACAGTATGGGCTTCTAAACCTGTAAACTCCCCTTACAATT  
 CCCCCATTTTACCTGTCCAAAAACTGGACAAGTCTTACAGGTTACTTCAGGATCTGTGCCTT  
 ATCAACCAAATTGTTTTGCCTAT--CCTTGTGGTGCGACACCCATTTACTCTCCTATCCTCAAT  
 ACCTCCCTCCACAACCCATTATTCTGTTCTGGATCTCAAACATGCTTTCTTTACTATTCTTTG  
 CATCCTTCATCCAGCCTCTTTTCGCTTTCCTTGGACTGACCCTGACACCCATCAGGCTCA  
 GGAAATTACCTGGGCTGACTGCTGCAAGGCTTCACGGACAGCCCCTATTACTTCAGTCAA  
 GCCCAAATTTCTTCCTCATCTGTTACCTATCTTGGCATCATTC-TCATAAAAACACAC--GTGCT



CTCCCTGCTGATCATGTCTGGCTAATCTCCCAAACCCCAACCCCTTCTACAAAACAACAACCT  
CCTTCCTTC-ATAGGCATGGTTAGCTACTTCCACCTTTGGATACCTAGTTTTACCATCTTGACT  
AAACCACGATGTAAACTCACAAAAGGAAACCTAGCTGACCCACAGATCCTAAATCCTTTT  
GCCACTCCTTTCCATTTCCTTAAAAACAGCCCTAGAAGCTGCTCCACACTAGCTCTCCCTAA  
CTCATCCCAATCC-TTTTTTCATTACACACAGTCAAAGTGCAGGGCTGTGAGGTCAAATCTT  
ACACAAGGATCGGGACCATGCCCTGTGGCCTTTTTATCCAAACAACCTTGACCTTACTCTTTT  
AGCTTAG-CCTCATGTCTGTGTGTGGCAGCTGCCGCTTCCTTAATACTTTTCAGAGGGCCCTCA  
AAATCACAACTATGCTCAAC-----TCACTCTCTAGAGTTCTCATAACTTCCAAAATCTATT  
TTCTTCCTCACACCTGATGCACATATTTCTGCTCC---CCCTCCACTACCTCTCAACAAGCCAA  
ACTCATTGCCTTAACTCAAGCCCTCGCTCTTGCAAAAGGATTAAGTGTCAATATTTATACTGA  
CTCTAAATATGCCTTCCATATCCTGCACCACCATGCTGTTATATGGGCAGAAAGAAATGTCTT  
AACTATGCAAGGGTCTCCATCATTAAATGCCTCTTTAATAAAAACTCTTCTCAAAGCTGCTTT  
ACTTCCAAAGGAAGCTGGAATCATTCACTGCAAGGGCCATCAAAAGGCATCAGATCCCAT  
GCTCAGGACAATGCTTATGCTGATATGGTAGCTAAA-AAGCAGCTAGCATTCTAATTCTATC  
CCTCACGGCAGTTTTTCTCCTTCGCATTTGGCCACTCCCACCTACTCCCCACTGAACTTC  
CACCTATCAGTCACTTCCCACGCAAGGCAAATGGTTCCTTGACCAAGGAAAATATCTCCTTC  
CAGCCTCACAGGCCCCATTCTATTCTGTGCATCTTTCATAACCTCTTCCATGTAGGTTACAAGC  
TGCTAGCCCATCTCTTAGAACCTCTCATTTCTTTCCATCGTGAGATCTATCTCAAGGAAA  
TCACTTCTCAG-TGTTCCATCTGCTATTCTACTACTCCTCAGGGATTGTTTCAGGCCCCCTCCC  
TTCCCTACACATCAAGCTCGGTGATTTGCCCTGCCAGGACTGGCAAATTGACTTTACTCA  
CATGCCCCGAGTCAGGAACTAAAATACCTCTTGGTCTAGGTAGACACTTTCACTGGACAG  
GTAGAGGCCTTTCCCACAGGGTCTGCGAAGGCCACCATGGTCATTTCTTCCCTTCTGTGAG  
GTATAATTCCTCAGTTTGACCTTCTACCTCTATACAGTCCAATAATGGACCAGCCTTTGTTA  
GTTAAATCACCCAACAGTTTCTCAGTCTCTCAGTATTATTAGTGGAACTTTCATACCCCTT  
ACTATCCTCAGTCTTCAGGAAAGGTA-----GAACGGGCTAATGGTCTTTTAAAAACACACCTC  
ACCAATCTCAGCCACCAACTTAAAAAGGACTAGACAATACTTTCACTTCTCCCTTCTCAA  
ACTTCAGGCCTGTCTTGGGATGCTACAGGGTACAGCCCATTTGAGCTTCTGTATGAACCTT  
CCTATTTATTAGGCCCCAGCCTTATTCCAGACACCAGCCCAACTTGGAAGTGTGCCCCAAAAA  
CTTGTGCATCCCTACTCTCTTCTGTCTAGTCATACTCCTATTACCGTTCTCAAATACTCATAAA  
TGCCCTGCTCTTGTGTTACACTGCCGGTTTACACTGTTTCTCCAAGCCATCACAGCTGATATCT  
CCTGGTGCTAT-CCCAAAGTCCACTCTTAACTCCCTCTTAAAGTAAATAAATAATCTTTGCT  
GGCAGGGCTATGCTGAACCTCCTTGGGCACTCTCTAATTAGATGTCCTAGGTCTCCCAATT  
CTTAGTCCTTTAATACCTGTTTTTCTCCTTCTTATTTCAGACCTTTT-GTCTTCCGTTTAGTTT  
TTCAATTACATAAAAAGTCTTCCAGGCCATCACCATCATTCTATATGATAAATGCTCCTTCT  
AACAAACCCACAAATATCACCCCTTACCACAAAATCTTCCTTCAGCTTAATCTCTCCCACTCT  
GGGTTTCCATGCCACCCCTAATCCTGCATGAAGCAGCCCTGAGAAACATCACCCATTATCTC  
TCCATGCCACCCCCCAAAAAATGTTTGC-TGCCCAACACTTCAATACTATTTTGTATTATTTT  
TCTTATTAATATAAGAAGGCAGG-----

>Pongo\_abelii-HERVHF\_INT(-)

GAAATAAACAGCCTTGTTGCTCACACAAAACCTGTTTGGTGGTCTCTTCATACAGACGCGA  
GTGAAATTTGGTGCCGTGACTCGGACTGGGGGACCACCCTTGGGAGATAAAGCCCCTGTCC  
TCCTGCTCTTTGCTCCATGAGAAAGATCCACCTACGACCTCGGGTCCTCAGACCAACCAGC  
CCAAGGAACATCTCATCAATTTTAAATCCGGTAAGTGACCTCTCTTTACTCTCTTCTCCAACC  
TCTCTTACTATCCCTCAACCTCTTTCTCCTTCAATCTTGGCGCCACACTTCAATCTCTCCCTT

CTCTTAATTTTCAGTTCCTTTTCCTTTCTGGTAGAGACAAAGGAGATGCGTTTTATCCGTGGAT  
 GCAAAACTCCGGCACCGGTACAGACTCGGGAAGACAGTCTTCACTTGGTGTTTAATCACT  
 GTGGGGACGCCTGCCTGATTATTCACCCACATTTTCATTGGTGTGTGATCACCGCAGGGACAT  
 CTGCCTTGGTCATTCACTCACATTCCCTTGGTGGCAAGTCAATTGCAGGGATGCCTGCTTTG  
 GCTGCTCACCTACATCGCAGCCCAGGGCTGCTCACCTAC-----  
 -----CCATTCTGTTTGTGCTCTACCTCTCTTTTCTCTCCACTTTCTGGGGGGC  
 AAGCACCTCCCACCCCTTTTCCACTTTCTGGGGGACAAGCACCTCCCCTC-----CTTCT  
 CTCTGTGTCTCTACCC-----TCTCTTTTCTCTGGACTTGC  
 CTCCTTCACTATGGGCAAACTTC--CACCTCCATTCTCCTTCTTCTCCCTTAGCCTATGTTT  
 TCAAGAACTTAAAACCTCTTCAACTCACACCTGACCTAAAACCTAAATGCCTTATTTTCTTC  
 TGCAATGTCGCTTAACCT--AATACAAAATCGACAAAATGGTTCCAAATAGCCAGAAAACAG  
 CACTTTTGATTTCTCCATCCTACAAGATCTAGATAATTATTGTCGTAAAATGGGCAAATGGTC  
 TGAGGTGCCTGACGTCCAGGTATTCTTTTACACATTGGTCCCTCCCTGGTCTCTGTTCCCAAT  
 GCAACTTGTCCT-----AAATCTTCTTTCTTTCCCTCCCGCCTG  
 TCCCTTCAGTCCCGACCCCAAGTGTTGCTGAGTCTTTCCAA--TCTTCCTTTTTTATGGACCC  
 ATCTGACCTCTCCCTCTCTCCCGAGGTGCTCCTCGCCAGGCCAAGCCAGGTCCCAA--TTCT  
 TCCTCAGCCTCCGCTCCCCACCCCTTTAATCCTTTTATCACCTCCCTCCTCACACCCAGTCT  
 GACTTACAGTTTCGTTCTGTGACTAGCCCTCCCTACCTGCCAGCAATTCCTCTTAAAAA  
 CGTGG-----CTGGAGCTGAAGGCATAGTCAAGGTTAATGCTCCTTTTTCTTTATCCGGCCTCT  
 CCCAAATCAGTTAGAATTTAGGCTCTTTTT-ATGAAATATAAAAACCCAGCCAGTTCATGGC  
 TTGTTTGGCAGCAATCCTGAGACACTTTACAGCCCTAGACCCTAAAAGGTCAAAAGCCCAT  
 CTTGTTCTCAAAATACGT---TTTATTACCCAATCTGCTCCTGACATTAAATAAAACTCCAAAA  
 ATTAAATTCAGCCCTCAAACCCCAACAGGACTTAATTAACCTTGCCTTCAGGGTGTACA  
 ATAATAGAGAAGAGTTGCAATTACTTGCCTCTGCTGTGAGAGAAACCCAGCCACATCTCC  
 AGCACACAAGAACTTCAAAACTCCTAAGCCACAGTGGCCAGGCGTTCCTTCAGGACTTCC  
 TCCCCAAGGATCTTGCTTCAAGTGCTGGAAATCTGGCCACTGGGCAAGGAATGCCCGCAG  
 CCCAGGATTCC-TCCTAAGCTGTGTCCCATCTGTGCAGGACCTCACTGGAAACTGGACTGTC  
 CAACTGGCCTAAGGCTCTGACTAGCTCCTTCCCAGATCTTCTCGGCTTAGCGGCTAAAGACT  
 GATGCTGCCTGATCACCTCAAAAGCTTCTGGACCATCACAGAAGCTCTAGGTAACCTCTTAC  
 AGTGGAGGGTAAGTCTGTCCCTTCTTAATCAATACAGAGGCTACCTACTCCACATTACCTT  
 CTTTTCAAGGGCCTGTTTCCCTTGCCTCCATAACTGTTGTGGGTATTGACAGCCAGGCTTCT  
 AAACCACTCAAAAATCCCCACTCTGGTGCTAACTTGGACAACATTCTTTTATGCACTCTTT  
 TTTAGTTATCCCTACCTGCCTAGTTCCCTATCAGGCTGAGACATTTTAACTAAATTATCTGCT  
 TCCCTGACTATTCTGGACTACAGCCACATCTCATTGCCGCCCTTCTTCCCAACCCAAAGCC  
 TCCTTCACGCCTTCTTCTCGTATCTCTCCACCTTAACCCACAAGTATGGAACACCTCTA---CT  
 CCCTCCCTGGCAACTGATCACCAGCCATT--ATCCCATTAACCCCAATCACCCTTACCCTG  
 CTCAACACTAGTATCCCATCCACAACAGGCTTTAAAGGGATTGAAGCCTGTTATCACTCGC  
 CTGCTACAGCATGGGCTTCTAAAACCTATAAACTCTTCTTAAATTTCCCCATTTTACCTGTC  
 CAAAAACCAGACAAGCCTTACAGATTAGTTCAGGATCTGCACCTTAACAACCAAGTTGTTT  
 TACCTGTCCACCCCATGGTGCCAAACCCATATACTCTCCTATCCTCAATACCTCCCTCCACAA  
 CCCATTATTCTGTTCTGGATCTCAAACATGCTTTCTTTACTATTCTTTGCACTCTTCATCCCA  
 GTCTCTCTTCACTTTCACTTGGACTGACCCTGACACCCATTAGGCTCAGCAAATTACCTGGG  
 CTGTAAGTGTGCAAGCCTTCACAGACAGCCCCATTACTTCAGTCAAGCCCCAAATTTCTTCC  
 TCATGTGTTACCTATCTCGACATAATTC-TCATAAAAACACAC--GTGCTCTCCCTGCTGATCAT

GTCCAGCTAATCTCCCAAACCCTGACCCCTTCTACAAAACGACAACTCCTTTTCCTTCCTACG  
CATGGTTAGGTACTTCTGCCTTTGGATACCTAGTTTTACCATCCTGACTTAACCATTATATAAA  
CTCACAAAAGCAAACCTAGCTGACCCACAGATCCTAAATCCTTTTGCCACTCCTTTCCATT  
CCTTAAAAACAGCCCTAGAAGCTGCTCCACACTAGTTCTCCCTAACTCATCTCAACCC-TT  
TTTCATTA-ACACAGCCAAAGTGCAAGGCTGTGCGGTCAAAATTCTTACACAAGGACCGGG  
ACCACGCCCTGTGGGCTTTTTATCCAAACAACTTGACCTTACTGTTTTAGCCTAGCCCTCAT  
GTCTGCGTGCAGTGGCTGCCGCTGCCTTAATACTTTTAGAGGCCCTTAAAATCACGAACAT  
GCTCAACTCTCTACAGTCACTCTCTACAGTTCTTATAACTTCCAAAATCTATTTTCTTCCTCA  
CACCTGACGCGTATACTTTCTGCT---CCCCTCCACTACCTCTCAGCAAGCCAAACTCATTGCC  
TTAACTCGAGCCCTCACTCTTGCAAAGGACTACGTGTCAATATTTATACTGACTCTAAATAT  
GCCTTCCATATCCTGTACCACCATGCTGTTATATGGGCAGAAAGAAATTTCTCCTACTATGCAA  
AGGTCCTCCATCATTAATTCCTCTTTAATAAAAACTCTTCTCAAAGCTGCTTTACTTCCAAAG  
GAAGCTGGAGTCGTTCACTGCAAGGGCCATCAAAGGCATCAGATCCCATCACTCAGGGC  
AATGCTTACGCTGACAAGGTAGCTAAAGAAGCAGCTAGCGTTCCAAATTCTATCC-----CAG  
TTTTTCTCCTTCTTGTCTGGCCACTCCCACTTACTACCCCACTGAAACTTCCACC-GTTAATC  
TCTTCCCACACAAGGCAAATGGTTCTTGGAACAAAGAAAATATCTCCTTCCAACCTCACAG  
GCCATTCTATTCTGTATCATTTTCATAACCTCTTCCATGTAGGTTACAAGCTGCTAGCCAC  
CTCTTAGAACCTCTCATTTCTTTCCATCGTGGAATCTATCCTCAAGGAAATCAGTTCTCAG  
-TGTTCCACCTGCTATTCTACTACTTCTCAGGGATTATTAGGCCCTCCCTTCCCTACACAT  
CAAGCTCAGGGATTGGCCCCTGCCAGTACTGGCAAATTGACTTTACTCACATGCCCTGAG  
TCAGGAACTAAAATACCTCTCGGTCTAGATAGACACTTTCACTGGATGGGTAGAGGCCTTT  
CCCACAGGGTCTGAGAAGGCCACCAGGGTCATTTCTTCCCTTCTGTCAGACATAATTCCTCG  
GTTTGGCCTTCCCACCTCTATACAGTCCGATAACGGACCAGCCTTTATTAGTCAAATCACCC  
AAGCAGTTTCTCAGGCTCTTAG---TGTTCACTGGAACCTTCATACCCCTTACTGTCCTTAGTC  
TTCAGGAAAGGTAGAACGGAACGGACTAATGGTCTTTTCAAAACACACCTCACCAAGCTC  
AGCCACCAACTTAAAAAGGACTAGACAATACTTTTACCCTTTCCCTTCTCAAAATTTCGGGC  
CTGTCCTTGGAAATGCTACAGGGTACAGCCCATTTGAGCTCCTGTATAGACTCTCCTTTTTATT  
AGGCCACAGCCTCATTCCAGACACCAGCCTAACTTGGACTGTGCCCCAAAACTTGTATC  
CATACTATCTTCTGCCTAGTCATACTCTTATTCACTGTTCTC---TACTCATAAATGCCCTACTCT  
TGTTTACACTGCCGTTTACACTGTTTCTCCAGGCCATCACAGCTGATATCTCCTGGTGCTAT  
CCCCAAATCACCACTCTTAACTCCCTCTTAAAGTAAATCAATAATCTTTGCTGGCAGGGCTAT  
GCTGAACCTCCTTGGGCACTCTCTAATTGGATGTCCTGGGTCCTCCCAATTCTTAGTCCTTTA  
ATACCTGTTTTTCTCCTTCTCTTATTTCGGACCTTGT-GTCTTCCGCTTAGTTTTTCAATTCATAC  
AAAACCACATCCAGGCCATCACCAATCATTCTATACGACAAATGCTCCTTCTAACAACCCCA  
CAATATCACGCCTTACCACAAAATCTTCTTCAAGCTTAATCTCTCCCACTCTGGGTTCCCATG  
CCACCCCTAATCCCGCTTGAAGCAGCTCTGAGAAACATTGCCATTATCTCTCCATGTCGCC  
CCCCAAAAAATTTTCGC-TGCCCAACACTTCAATACTATTTTATGTTATTTTCTTATTAATAT  
AAGAAGGCAG-----

>Pygathrix\_nemaeus-HERVHF\_INT(+)

-----TTTGGTGCCGTGACTCAGATTGGGGGAC  
CTCTCTTGGGAGATCAATCCCCTGTCCTCCTGCTCTTTGCTGCATGAGAAAGATCCACTTAC  
GACCTCAGGTCCTCAGACCAACCAGCCCCAAGAACATCTCACCAATTTTAAATGGGGTAAG  
CAGCCTCTCTTTACTCTCTTCTCTAACCTCTCTCACTATCCCTCAACCTCTTTCTCCTTTCAAT  
CTTGGTGCCACACTTCAATCTCTCCCTTCTCTTAATTTCAAGTTCCTTTCTTTCTGGTAGAG

ACAGAGGAGACGTGTTTTATCCATGAACCCAAAACCTCTGGCACCGGTCACCAACTCAGGA  
 AGACAGTCTTCCCTTGGTGTTTAATTCCTGCAGGGATGTCTGCCTGATTATTCACCCACATTT  
 CATTAGTGTCTGATCACCGCAGGGATGCCTGCCTTCGTCATTACCCACAATCCCTTGGTGG  
 CAAGTCTATTGCAGGGACGTCTGCTTTGGCTGCTCACCCACATTGCAGCCTAGGGCTCCTCA  
 CCCCAC-----CTCTTCTCTTCGTGTCTCTACTCT  
 CTCTTCTCTCCA-----CTTTCTTGGGGGGCAAGCACCCCTCACCC---  
 -----CTTCTCTCTGTGTCTCTACCC-----TCTCTTTTCTCT  
 GGACTTGCCTCCTTCACTATGGGCAACCTTC--CACCCCTCCATTCTCTCTTCTCTTCTTCTAGC  
 CTGTGTTCTCAAGAACTTAAAACCTCTTCAACTCACACCTGACCTAAATCCTTAATGCCTTA  
 TTTTCTTCTGCAATGCCTCTTAACCCC--AATACAAACTCGAC-AATGGTTCCAAATAGCCAGA  
 AAACGGCACTTTCGATTCTCCATCCTACAAGATCTAGATAATTCTCGTCATAAAATGGGCA  
 AATAGTCTGAGGTGCCTGATATCTAGGCATTCTTTTACACATGGGTCCCACCCTGGTCTCTGT  
 CCCCATGCAACTCATCCC-----AAATCTTCCTTCTTTCCCTC  
 CTGTCTGTCCCCCTCAGTCCCAACCCCAAGAGTTGCTGAGTCTTTCTAA--TCTTCTTTTTTTA  
 CGGACCCATCTGACCTCTCCCCTCCTCCCCAGGCTGCTCCTCACCAGGCCAAGCGAGGTCC  
 CAAGTTCTTCCCTCAGCCTCCACTCCCCACCCTATAATCCTTTTATCACCTCCCCCTCCTCACA  
 CCCGGTCCGACTTACAGTTTCATTCTGTGACTAGCCCTCCCCACCTGCCAGCAATTACCT  
 CTTAAAAAGGTGG-----CTGGAGCTGAAGGCATAGTCAAGGTTAGTGCTCCTTTTTCTTTAT  
 CTGGCCTCTCCCAAATCAGTTAGCATTTAGGCTCTTTTTCATCAAATATAAAAAACCCAGCCC  
 AGTCTCATGGCTTGTTTGGCAACAACCCTGAGACGCTTTACTGCCCTAGACCCTGAAAGGCC  
 AAAAGGCTGTCTTATTCTCAATATACAT--TGTATTACCCAATCCACTGCTGACATTAAATAAA  
 ACACCAAAAATTAAGTTCCAGCCCTCAAACCCCAACAACGGGACTTAATTAACCTTGCCTTC  
 AAGGTGTACAATAATAGAGAAGAGTTGCAATCACTTGCGTCCCTCTGTGAGAGAAACCCCAAG  
 CCACATCTCCAGCACACAAGAACTTCAAACGCCTAAGCCACAGTGGCCAGGCGTTCCCTTC  
 AGGACTTTCTCCCCCAGGATCTTGCTTTAAGTGCTGGAAATCTGGCCACTGGGCCAAGGAA  
 TGCCCGTAGCCCAGGATTCC-TCCTAAGATGTGTCCCATCTGTGCAGGACCCCACTGGAAAT  
 TGGACTGTCCAACCTGACCCAAGGCTCTGACTGACTCCTTCCCAGATCTTCTCAGCTTAGTG  
 GCTGAAGACTGACACTGCCCAATTGCCTTGGAAGCCTCCTGGACCATCCCAGATGCTTTGG  
 GTAACCTTTACAGTTGAGGGTAAGTCTGTCCCCTTCTTAATCAATACAGAGGCTACCCACTC  
 CACATTATCTTCTTTTCAAGGGCCTGTTTCCCTTGCCTCCATAACTGTTGTGGGTATTGATGG  
 CCAGGCTTCTAAACCTCTTAAAACCTCCCCACTCTCATGCTAACTTGAACAATATTATTTTAT  
 GCACTCTTCTTTAGTTA-CTCCACCTGCCAGTTCCCTTATTAGGCCGAGATATTTTAACCAAA  
 TTGCTGTCTTCCCTGACTATTCTGGAAGTACAGCCACATCTCATTGCTACCCTGCTTCCCAAC  
 CCAAAGCCTCCTTCGCACCTTCTCTCATATCCCCCAAACCTTAACCCACAAGTATGGGACAC  
 CTCTA---CTCCCTCCCTGGCAACCGATCACCAGCCTATTACTATCCCATTAACCTAATCAC  
 CCTTATCCCATTCAACGCCAGTATCCCATCCCACAACAGGCTTTAAAGGGATTGAAGCCTGT  
 TATCACTCGCCTGCTACAGTATGGGCTTCTAAAACCTGTAAACTCCCCTTACAATTCCCCTGT  
 TTTACCTGACCAAAAACCGGACAAGTCTTACAGGTTACTTCAGGATCTGTGCCTTATCAACC  
 AAATTGTTTTGCCTATCCACCTTGTGGTGTGAAACCCATTTACTCTCCTATCCTTGATACCTC  
 CCTCCACAACCCATTATTCCGTTCTGGATCTCAAACATGCTTTGTTTACTATTCTTTGCATCC  
 TTCATGCCAGCCTCTTTTCACTTTCACTTGGACTGACCCTGACACCCATCAGGCTCAGGAAA  
 TTACCTGGGCTGTACTGCTGCAAGACTTCGCAGACAGCCCCATTACTTCAGTCAAGCCCA  
 AATTTCTTCTCATCTGTTACCTATCTTGGCATAATTC-TCATAAAAACACAT--GTACTCTCCCT  
 GCTGATCATGTCTGGCTAATCTCCCAAACCCCAACCCCTTCTACAAAACAACAACCTCCTTCC

TTC-GTAGGCATGGTTAGGCACTTCCACCTTTGGATACCTAGTTTTACCATCTTGACTAAACC  
ATGATGTAAACTCACAAAAGGAAACCTAGCTGACCCACAGATCCTAAATCCTTTGACCAC  
TCCTTTCCATTTCCTTAAAAACAGCCCTAGAAGCTGCTCCCACACTAGCTCTCCCTAACTCAT  
CCCAATCC-TTTTTATTACACACAGTCAAAGTGCAGGGCTGTGAGGTCAAATTTCTTACAC  
AAGGATCAGGACCATGCCCTGTGGCCTTTTTATCCAAACAACTTGACCTTACTATTTAGCTT  
AG-CGTCATGTCTGTGTGTGGCAGCTGCCCCCTTCCTTAATACTTTTAGAGGGCCCTCAAATCA  
CAAATATGCTCAAC-----TACTCTCTAGAGTTCTCGTAACTTCCAAAATCTATTTTCTTCC  
TCACACCTGATGCACATATTTTCTGCT--CCCCTCCACTACCTCTCAACAAGCCAACTCATT  
GCCTTAACTCAAGCCCTCGCTGTTGCAAAGGATTAAGCATCAATATTTATACTGACTCTAAA  
TATGCCTTCCATATCCTGCACCACCATGCTGTTATGTGGGTAGAAAGAAATTTCCCTCACTATG  
CAAGGGTCCATCATTAATGCCTCTTTAATAAAAACTCTTCCCAAAGCTGCTTTACTTCCA  
AAGGAAGCTGGAGTCATTCACTGCAAGGGCCATCAAAGGCATCAGATCCCATTGTTTCAGG  
ATAATGCTTATGCTGATACGGTAGCTAAA-AAGCAGCTAGCATTCCAACCTTCTGTCCCTCACT  
GCAGTTTTTCTCCTTCTCATCTGGCCACTCCCACCTACTCCCCACTGAAACTTCCACCTAG  
CAATCTCTTCCCACACAAGGCAAATGGTTCTTGGACCAAGGAAAATATCTCCTTCCAGCCTC  
ACAGGCCCATTTCTATTCTGTTCATTTTATAACCTCTTCCATGTAGGTTACAAGCTGCTTGC  
CCGTCTCTTAGAACCTCTCATTTCTTCCATCGTGGAATCTATCTCAAGGAAATCACTTC  
TCAG-TGTTCCATCTGCTATTCTACTAATCCTCAGGGATTGTTTCAGGCCCCCTCCCTTCCCTAC  
ACATCAAGCTTGGGGATTGCTCCTGCCAGGACTGGCAAATTGACTTTACTTACATGCCCC  
GAGTCAGGAAACTAAAATACCTCTTGGTCTGGGTAGACACTTTCAGTGGATGGGTAGAGGC  
CTTTCCACAGGGTCTGCGAAGTCCACCGTGGTCATTTCTTCCCTTCTGTTAGGCATAATTC  
CTCGTTTTGACCTTCCTACCTCTATACAGTCCAATAATGGACCAGCCTTTGTTAGTTAAATCA  
CCCAACCAGTTTCTCAGGCTCTTAG---TATTCAGTGGAACCTTTCATACCCCTTACCATCCTCA  
ATCTTCAGGAAAGGTA-----GAACGGGCTAATGGTCTTTTAAAATCACACCTCACCAAGCTCA  
GCCACCAACTTAAAAAGACTAGACAATACTTTTACCCTTCCCTTCTCAAAATTCGGGGCC  
TGCTCTCGGGATGCTACAGGATACAGCCATTTGAGCTTCTGTATGAACGCTCATTTTTATTA  
GGCCCCAGTCTTATCCAGACACGAGCCCAACTTGGACTGTGCCCCAAAAACTTGTATCC  
CTACTCTCTTCTGTCTAGTCATACTCCTATTCACTGTTCTCAAATACTCATAAATGCCCTGCTC  
TTGTTTAACTGCCGTTTAACTGTTTCTCCAAGCCATCACAGCTGATGTCTCCTGGTGCTA  
T-CCCAAACCTGCCACTCTTAACTCCCTCTTAAAGTAAATAAATACTCTTTGCTGGCAGGGCTA  
TGCTGAACCTCCTTGGGCACTGTCTAATTGGATGTCTGGATCCTCCCAATTCTCAGTCCTTT  
AATACCTGTTTTTCTCCTTCTTATTTCGGACTTTTT-GTCTTCCGTTTAG-TTCTCAATTCATA  
CAAACCTGCTTCCAGGCCATCACCATCATTCTATATGACAAATGCTCCTTCTAACAACCCC  
ACAATATCACCCCTTACCCCAAATCTTTCTTCAGCTTAATCTCTCCCATCTGGGTTTCCAT  
GCCACCCCTAATCCTGCTTGAAGCAGCCCTGAGAAATATCACCCATTATCTCTCCATACCATC  
CCCCAAAAATTTTTGC-TGCCCTAACACTTCAGTACTATTTTATATTATTTTCTTATTAATAT  
AAGAAGGC-----

>Rhinopithecus\_roxellana-HERVHF\_INT(-)

-----ATTTGGTGCCGTGACTCAGATTGGGGGA  
CCTCTCTTGGGAGATCAATCCCCTCTCCTCTGCTCTTTGCTGCATGAGAAAGATCCACTTA  
CGACCTCAGGTCCTCAGACCAACCAGCCCCAAGAACATCTCACCAATTTTAAATGGGGTAA  
GCAGCCTCTCTTACTCTCTTCTCCAACCTCTCTCACTATCCCTCAACCTCTTTCTCCTTTCA  
ATCTTGGTGCCACACTTCATTCTCTCCCTTCTCTTAATTTTCAGTTCCTTTTCTGGTAGA  
GACAGAGGAGACGTGTTTTATCCATGAACCCAAAACCTCTGGCACCGGTACCAACTCGGG

AAGACAGTCTTCCCTTGGTGTTTAATTCTGCAGGGACGTCTGCCTGATTATTCACCCACAT  
TTCGTTGGTGTCTGATCACCGCAGGGATGCCTGCTTTCGTCATTACCCACAATCCCTTGGT  
GGCAAGTCTATTGCAGGGACGCCTGCTTGGCTGCTCACCCACATTGCAGCCTAGGGCTGC  
TCACCCAC-----CCCTTCTCTTCGTGTGCTA  
CTCTCTCTCTCTCCA-----CTTCTTGGGGGGCAAGCACCCCTCAT  
CC-----CTTCTCTCTGTGTCTCTACCC-----TCTCTTTT  
CTCTGGACTTGCCTCCTTCACTATGGGCAACCTTC--CACCTCCATTCCCTCCTTCTTCTCTCT  
TAGCCTGTGTTCTCAAGAACTTAAACCTCTTCAACTCACACCTGACCTAAAACCTTAATGC  
CTTATTTTCTTCTGCAATGCCTCTTAACCCC--AATACAACTCGAC-AATGGTTCCAAATAGC  
CAGAAAACGGCACTTTCGATTTCTCCATCCTACAAGATCTAGATAATTCTCATCATAAAATGG  
GCAAATAGTCTGAGGTGCCTGATGTCTAGGCATTCTTTTACACATGGGTCCCACCCTGGTCT  
CTGTCCCCAATGCAATTCATCCC-----AAATCTTCCTTCTTTT  
CCTCCTGTCTGTCCCCTCAGTCCCAACCCCAAGAGTTGCTGAGTCTTTCTAA--TCTTCCTTT  
TTTACGGACCCATCTGACCTCTCCCCTCCTCCCCAGGCTGCTCCTCGCCAGGCCAAGCGAA  
GTCCCAAGTTCTTCCTCAGCCTCCACTCCCCCACCCTCTAATCCTTTTATCACCTCCCCTCCT  
CACACCCGGTCCGACTTACAGTTTCATTCTGTGACTAGCCCTCCCCACCTGCCCAGCAATT  
ACCTCTTAAAAAGGTGG-----CTGGAGCTGAAGGCACAGTCAAGGTTAATGCTCCTTTTCT  
TTATCCAGCCTCTCCCAAATCAGTTAGCATTTAGGCTCTTTTTCATCAAATATAAAAACCCAG  
CCCAGTTCATGGCTTGTTTGGCAACAACCCTGAGACGCTTTACTGCCCTAGACCCTGAAAG  
GCCAAAAGGCTGTCTTATTCTCAATATACAC---TGTATTACCCAATCCACTCCTGACATTAAAT  
AAAACACCAAAAAATTAAGTTCCAGCCCTCAAACCCCAACAGGACTTAATTAACCTTGCC  
TTCAAGGTGTACAATAATAGAGAAGACTTGCAATCACTTGCGTCCTCTGTGAGAGAAACCC  
CAGCCACATCTCCAGCACACAAGAACTTCAAACGCCTAAGCCACAGTGGCCAGGCGTTC  
CTTCAGGACTTTCTCCCCCAGGATCTTGCTGTAAGTGCTGGAAATCTGGCCACTGGGCCAA  
GGAATGCCCCGTAGCCCAGGATTCC-TCCTAAGATGTGTCCCCTCTGTGCAGGACCCCACTGG  
AAATTGGACTGTCCAAGTACCCCAAGGCTCTGACTGACTCCTTCCCAGATCTTCTCAGCTTA  
GTGGCTGAAGACTGACGCTGCCCAATTGCCTTGGAAGCCTCCTGGACCATCCAGATGCTT  
TGGGTAACTCTTACAGTTGAGGGTAAGTCTGTCCCCTTCTTAATCAATACAGAGGCTACCCA  
CTCCACATTATCTTCTTTTCAAGGGCCTGTTTCCCTTGCTCCATAACTGTTGTGGGTATTGA  
TGGCCAGGCTTCTAAACCCCTTAAACTCCCCCACTCTCGTGCTAACTTGGACAATATTATT  
TTATGCACTCTTCTTTAGTTA-CCCCACCTGCCAGTTCCCTTATTAGGCCAAGATATTTTAAAC  
CAAATTGTCTGCTTCCCTGACTATTCCTGGACTACAGCCACATCTCATTGCTACCCTGCTTCC  
CAACCCAAAGCCTCCTTCGCGCCTTCCTCTCATATCCCCCAAACCTTAACCCACAAGTATGGG  
ACACCTCTA---CTCCCTCCCTGGCAACCGATCACCAGCCTATTACTATCCCATTAACCTAA  
TCACCCCTTATCCATTCAACGCCAGTATCCCATCCCACAACAGGCTTTAAAGGGATTGAAGC  
CTGTTATCACTCGCCTGCTACAGTATGGGCTTCTAAACCTGTAAACTCCCCTTACAATTCCC  
CCATTTTACCTGTCCAAAAACCAGACAAGTCTTACAGGTTACTTCAGGATCTGTGCCTTATC  
AACCAAATTGTTTTGCCTATCCACCTTGTTGGTGTGAAACCCATTTACTCTCCTGTCTCGATA  
CCTCCCTCCACAACCCATTATTCCGTTCTGGATCTCAAACATGCTTTGTTTACTATTCTTTG  
CATCCTTCATGCCAGCCTCTTTCCACTTTCATTGGACTGACCCTGACACCCATCAGGCTCA  
GGAAATTACCTGGGCTGTACTGCTGCAAGACTTCGCGGACAGCCCCTATTACTTCAGTCAA  
GCCCAAATTTCTTCCTCATCTGTTACCTATCTTGGCATAATTC-TCATAAAAACACAT-GTGCT  
CTTCTGCTGATCATGTCTGGCTAATCTCCCAAACCCCAACCCCTTCTACAAAACAACAACT  
CCTTCCTTC-GTAGGCATGGTTAGGCACTTCCACCTTTGGATACCTAGTTTTTACCATCTTGACT

AAACCATGATGTAAACTCACAAAAGGAAACCTAGCTGACCCACAGATCCTAAATCCTTTG  
 ACCACTCCTTTCCATTCTTAAAAACAGCCCTAGAAGCTGCTCCCACACTAGCTCTCCCTAA  
 CTCATCCCAATCC-TTTTTCATTACACACAGTCAAAGTGCGAGGGCTGTGAGGTCAAAATTCTT  
 ACACAAGGATCGGGACCATGCCCTGTGGCCTTTTTATCCAAACAACTTGACCTTACTGTTTT  
 AGCTTAG-CGTCATGTCTGTGTGTGGCAGCTGCCGCTTCCTTAATACTTTTAGAGGCCCTCAA  
 AATCACAAACTATGCTCAAC-----TTACTCTCTAGAGTTCTCATAACTTCCAAAATCTATTTT  
 CTTCTCACACCTGATGCACATATTTTCTGCT---CCCCTCCACTACCTCTCAACAAGCCAAAC  
 TCATTGCCTTCACTCAAGCCCTTGCTCTTGCAAAAGGATTAAGCATCAATATTTATGCTGACT  
 CTAAATATGCCTTCCATATCCTGCACCACCATGCTGTTATGTGGGTAGAAAGAAATGTCCTCA  
 CTATGCAAGGGTCCCTCCATCATTAATGCCTCTTTAATAAAAACCTTCTCAAAGCTGCTTTAC  
 TTCCAAAGGAAGCTGGAGTCATTCAGTCAAGGGCCATCAAAAGGCATCAGATCCCATTTGT  
 TCAGGACAATGCTTATGCTGATACGGTAGCTAAA-AAGCAGCTAGCATTCCAACCTTCTGTCC  
 CTCAGTGCAGTTTTTCTCCTTCTCATCTGGCCACTCCACCTACTCCCCCACTGAAACTTCC  
 ACCTATCAATCTCTTCCCACACAAGGCAAATGGTTCTTGACCAAGGAAAATATCTCCTTCC  
 AGCCTCACAGGCCCATTTCTATTCTGTGGTCATTTCTATAACCTCTTCCATGTAGGTTACAAGCT  
 CCTTGCCCGTCTCTTAGAACCTCTCATTTCTTTCCATCGTGGAAATCTATCCTCAAGGAAAT  
 CACTTCTCAG-TGTTCCATCTGCTATTCTACTAATCCTCAGGGATTGTTTCAGGCCCCCTCCCTT  
 CCTACACATCAAGCTTGGGGATTTGCCCTGCCCAGGACTGGCAAATTGACTTTACTCACA  
 TGCCCCGAGTCAGGAAACTAAAATACCTCTTGGTCTGGGTAGACACTTTCAGTGGATGGGT  
 AGAGGCCTTTCCCACAGGGTCTGCAAAGGCCACTGTGGTCATTTCTTCACTTCTGTTAGGC  
 ATAATTCCTCAGTTTGACCTTCTACCTCTATACAGTCCAATAATGGACCAGCCTTTGTTAGT  
 TAAATCACCCAACCAAGTTTCTCAGGCTCTTAG---TATTCAGTGGAATTTTCATACCCCTTACC  
 ATCCTCAATCTTCAGGAAAGGTA----GAACGGGCTAATGGTCTTTTAAATCACACCTCACC  
 AAGCTCAGCCACCGACTTAAAAAAGACTAGACAATACTTTTACCCTTCTCCCTTCTCAAAAT  
 TCGGGCCTGTCCTCGGGATGCTACAGGGTACAGCCCATTTGAGCTTCTGTATGAACGCTCAT  
 TTTTATTAGGCCCCAGTCTTATTCAGACACGAGCCCAACTTGGACTGTGCCCCAAAAGCTT  
 GTCATCCCTACTCTCTTCTGTCTAGTCATACTCCTATTACCGTTCTCAAATACTCATAAATGC  
 CCTGCTCTTGTTTACTGCGGTTTACTGTTTCTCCAAGCCATCACAGCTGATGTCTCCT  
 GGTGCTAT-CCCAAAGTCCACTCTTAACTCCCTCTTAAAGTAAATAAATACTCTTTGCTGGC  
 AGGGCTATGCTGAACCTCCTTGGGCACTCTCTAATTGGATGTCCTGGATCCTCCCAATTCTC  
 AGTCCTTTAATACCTGTTTTTCTCCTTCTCCTATTTCGGACCTTTT-GTCTCCGTTTATG-TTTTC  
 AATTCATACAAAAGTCTTCCAGGCCATCACCAATCATTCTATATGATAAATGCTCCTTCTAA  
 CAACCCCAACAATATCACCCCTTACCCCAAAATCTTTCTTCAGCTTAATCTCTCCCATTTCTGGG  
 TTTCCATGCCACCCCTAATCCTGCTTGAAGCAGCCCTGAGAAATATCACCCATTATCTCTCCA  
 TACCATCTCCCCAAAATTTTTGC-TGCCCTAACACTTCAGTACTATTTTATATTATTTTCTTA  
 TTAATATAAGAAGGCAG-----

>Rhinopithecus\_strykeri-HERVHF\_INT(+)

-----TTTGGTGCCGCGACTCAGATTGGGGGAC  
 CTCTCTTGGGAGATCAATCCCCTCTCCTCCTGCTCTTTGCTGCATGAGAAAGATCCACTTAC  
 GACCTCAGGTCCCTCAGACCAACCAGCCCCAAGAACATCTCACCAATTTTAAATGGGGTAAG  
 CAGCCTCTCTTTACTCTCTTCTCCAACCTCTCTCACTATCCCTCAACCTCTTTCTCCTTTCAAT  
 CTTGGTGCCCACTTCAATCTCTCCCTTCTCTTAATTCAGTTCCTTTCTCTTTCTGGTAGAG  
 ACAGAGGAGACGTGTTTTATCCATGAACCCAAAACCTCTGGCACCGGTCACCAACTCGGGA  
 AGACAGTCTTCCCTTGGTGTTTAATTCCTGCAGGGACGTCTGCCTGATTATTCACCCACATTT

CATTAGTGTCTGATCACTGCAGGGATGCCTGCTTTTCGTCATTACCCACAATCCCTTGGTGG  
 CAAGTCTATTGCAGGGACACCTGCTTTGGCTGCTCACCCACATTGCAGCCTAGGGCTGCTC  
 ACCC-----CTTCTCTCTGTGTCTCTACCCCTC  
 TCTTTTCTCTGGACTT-----GCCTCCTTCACTATGGGCAACCTTCCACCCTC  
 CATTCCCTCCTTCTTCTCTCTGTGTCTCTACCC-----TCTC  
 TTTTCTCTGGACTTGCCTCCTTCACTATGGGCAACCTTCC--CACCTCCATTCCCTCCTTCTTCT  
 CTCTTAGCCTGTGTTCTCAAGAACTTAAACCTCTTCAACTCACACCTGACCTAAACCTTA  
 ATGCCTTATTTTCTTCTGCAATGCCTCTTAACCCC--AATACAAACTCGAC-AATGGTTCCAAA  
 TAGCCAGAAAACGGCACTTTTCGATTTCTCCATCCTATAAGATCTAGATAATTCTCGTCATAAA  
 ATGGGCAAATAGTCTGAGGTGCCTGATGTCTAGGCATTCTTTTACACATGGGTCCCACCCTG  
 GTCTCTGTCCCCAGTGCAACTCATCCCAAATCTTCCTTCTTTCCCTCCTGTCTGTCCCCAGTG  
 CAACTCATCCCAAATCTTCCTTCTTTCCCTCCTGTCTGTCCCCTCAGTCCCAACCCCAAGAG  
 TTGCTGAGTCTTTCTAA--TCTTCCTTTTTTACGGACCCATCTGACCTCTCCCCTCCTCCCCAG  
 GCTGCTCCTCACCAGGCCAAGCGAAGTCCCAAGTTCTTCCTCAGCCTCCGCTCCCC-ACCCT  
 ATAATCCTTTTATCACCTC-CCTCCTCACACCCGGTCCGACTTACAGTTTCATTCTGTGACTAG  
 CCCCTCCCCACCTGCCAGCAATTACCTCTTAAAAAGGTGG-----CTGGAGCTGAAGGCATA  
 G-CAAGGTTAATGCTCCTTTTTCTTTATCCGGCCTCTCCCAAATCAGTTAGCATTTAGGCTCTT  
 TTTTCATCAAATATAAAAACCCAGCCCAGTTCATGGCTTGTTTGGCAACAACCTGAGACGCT  
 TTAAGTGCCTTAGACCCTAAAAGGCCAAAAGGCTGTCTTATTCTCAATATACATGTATGTATTA  
 CCCAATCCACTCCCGACATTAAATAAAACACCAAAAATTAACCTCCAGCCCTCAAACCCCA  
 CAACAGGACTTAATTAGCCTTGCCTTCAAGGTGTACAATAATAGAGAAGACTTGCAATCACT  
 TGCGTCCTCTGTGAGAGAAACCCAGCCACATCTCCAGCACACAAGAAGTTCAAAACGCC  
 TAAGCCACAGTGGCCAGGCGTTCCCTCAGGACTTTCTCCCCCAGGATCTTGCTGTAAAGTGC  
 TGGAATCTGGCCACTGGGCCAAGGAATGCCCGTAGCCCAGGATTCC-TCCTAAGATGTGTC  
 CCATCTGTGCAGGACCCCACTGGAAATTGGACTGTCCAAGTACCCCAAGGCTCTGACTGAC  
 TCCTTCCCAGATCTTCTCAGCTTAGTGGCTGAAGACTGACGCTGCCCAATTGCCTTGGAAG  
 CCTCCTGGACCATCCAGATGCTTTGGGTAACTCTTACAGTTGAGGGTAAGTCTGTCCCCTT  
 CTTAATCAATACAGAGGCTACCCACTCCACATTATCTTCTTTTCAAGGGCCTGTTTCCCTTGC  
 CTCCATAACTGTTGTGGGTATTGATGGCCAGGCTTCTAAACCCCTTAAACCTCCCCACTCT  
 CGTGCTAACTTGGACAATATTATTTTATGCACTCTTCTTTAGTTA-CCCCACCTGCCAGTTCC  
 CTTATTAGGCCAAGATATTTTAAACCAAAATTGTCTGCTTCCCTGACTATTCTGGACTACAGCC  
 ACATCTCATTGCTACCCTGCTTCCCAACCCAAAGCCTCCTTCGCGCCTTCCTCTCATATCCCC  
 CAAACTTAAACCCACAAGTATGGGACACCTCTA---CTCCCTCCCTGGCAACCGATCACCAGCT  
 TATTACTATCCCATTAACCTAATCACCTTATCCCATTCATGCCAGTATCCCATCCCACAA  
 CAGGCTTTAAAGGGATTGAAGCCTGTTATCACTTGCTGTACAGTATGGGCTTCTAAAACC  
 TGTAACCTCCCCTTACAATTCCCCCATTTTACCTGTCCAAAAACCAGACAAGTCTTACAGGT  
 TACTTCAGGATCTGTGCCTTATCAACCAAAATTGTTTGCCTATCCACCTTGTGGTGTGAAACC  
 CATTTACTCTCCTATCCTCGATACCTCCCTCCACAACCCATTATTCGGTTCTGGATCTCAAACA  
 TGCTTTGTTTACTATTCTTTGCATCCTTCATGCCAGCCTCTTCCACTTTCACTTGGACTGA  
 CCCTGACACCCATCAGGCTCAGGAAATTACCTGGGCTGTACTGCTGCAAGACTTCGCGGAC  
 AGCCCCTATTACTTCAGTCAAGCCCAAATTTCTTCCTCATCTGTTACCTATCTTGGCATAATTC  
 -TCATAAAAACACAT--GTGCTCTCCCTGCTGATCATGTCTGGCTAATCTCCCAAACCCCAACC  
 CCTTCTACAAAACAACAACTCCTTCCTTC-GTAGGCATGGTTAGGCACTTCCACCTTTGGATA  
 CCTAGTTTTACCATCTTGACTAAACCATGATGTAACTCACAAAAGGAAACCTAGCTGACCC



CACAGATCCTAAATCCTTTGACCACTCCTTTCCATTCCCTTAAAAACAGCCCTAGAAGCTGCT  
CCCACACTAGCTCTCCCTAACTCATCCCAATCC-TTTTTCATTACACACAGTCAAAGTGCAGG  
GCTGTGAGGTCAAAATTCTTACACAAGGATCGGGACCATGCCCTGTGGCCTTTTTATCCAAA  
CAACTTGACCTTACTGTTTTAGCTTAG-CGTCATGTCTGTGTGTGGCAGCTGCCGCTTCCTTA  
ATACTTTTAGAGGCCCTCAAAATCACAACTATGCTCAAC-----T TACTCTCTAGAGTTCTC  
ATAACTTCCAAAATCTATTTTCTTCCTCACACCTGATGCACATATTTTCTGCT---CCCCCTCCAC  
TACCTCTCAACAAGCCAAACTCATTGCCTTCACTCAAGCCCTCGCTCTTGCAAAAGGATTA  
AGCATCAATATTTATACTGACTCTAAATATGCCTTCCATATCCTGCACCACCATGCTGTTATGT  
GGGTAGAAAGAAATTTCCCTCACTATGCAAGGGTCCTCCATCATTAAATGCCTCTTTAATAAAA  
ACTCTTCTCAAAGCTGCTTTACTTCCAAAGGAAGCTGGAGTCATTCACTGCAAGGGCCATC  
AAAAGGCATCAGATCCCATTGTTTCAAGGACAATGCTTATGCTGATACGGTAGCTAAA-AAGCA  
GCTAGCATTCCAACCTTCTGTCCCTCACTGCAGTTTTTCTCCTTCTCATCTGGCCACTCCCACC  
TACTCCCCCACTGAAACTTCCACCTATCAATCTCTTCCCACACAAGGCAAATGGTTCTTGGA  
CCAAGGAAAATATCTCCTTCCAGCCTCACAGGCCCATTTCTATTCTGTCTGTCATTTCATAACCT  
CTTCGATGTAGGTTACAAGCTGCTTGCCCGTCTCTTAGAACCTCTCATTTCCTTTCCACCGTG  
GAAATCTATCCTCAAGGAAATCACTTCTCAG-GATTCCATCTGCTATTCTACTAATCCTCAGG  
GATTGTTCAAGCCCCCTCCCTTCCCTACACATCAAGCTTGCGGATTTGCCCTGCCAGGAC  
TGGCAAATTGACTTTACTCACATGCCCTGAGTCAGGAACTAAAATACCTCTTGGTCTGGGT  
AGACACTTTCACTGGATGGGTAGAGGCCTTTCCCACAGGGTCTGCGAAGGCCACTGTGGTC  
ATTTCTTCACTTCTGTTAGGCATAATTCCCTCAGTTTGACCTTCCCTACCTCTATACAGTCCAATA  
ATGGACCAGCCTTTGTTAGTTAAATCACCAACCAGTTTCTCAGGCTCTTAG---TATTCAGTG  
GAATTTTCATACCCCTTACCATCCTCAATCTTCAGGAAAGGTA-----GAACGGGCTAATGGTCT  
TTTAAATCACACCTCACCAAGCTCAGCCACCGACTTAAAAAAGACTAGACAATACTTTTA  
CCACTTTCCCTTCTCAAAATTCGGGCCTGTCTCGGGATGCTACAGGGTACAGCCCATTGGA  
GCTTCTGTATGAACGCTCATTTTTATTAGGCCCCAGTCTTATCCAGACACGAGCCCAACTTG  
GACTGTGCCCCAAAAGCTTGTCTATCCCTACTCTCTTCTGTCTAGTCATACTCCTATTACCGT  
TCTCAAATACTCATAAATGCCCTGCTCTTGTGTTTACACTGCCGGTTTACACTGTTTCTCCAAGC  
CATCACAGCTGATGTCTCCTGGTGCTAT-CCCAAAGTCCACTCTTAACTCCCTCTTAAAGTA  
AATAAATACTCTTTGCTGGCAGGGCTATGCTGAACCTCCTTGGGCACTCTCTAATTGGATGT  
CCTGGATCCTCCCAATTCTCAGTCCTTTAATACCTATTTTTCTCCTTCTCCTATTCCGACCTTT  
T-GTCTTCCGTTTAG-TTTTCAATTCATACAAAAGTCTTCCAGGCCATCACCAATCATTCTATA  
TGATAAATGCTCCTTCTAACAACCCCAACAATATCACCCCTTACCCCAAAATCTTTCTTCAGCT  
TAATCTCTCCCATCTGGGTTTCCATGCCACCCCTAATCCTGCTTGAAGCAGCCCTGAGAAA  
TATCACCCATTATCTCTCCATACCATCCCCCAAAAATTTTGC-TGCCCTAACACTTCAGTAC  
TATTTTATATTATTTTCTTATTAATATAAGAAGGCAGGAATGTCAGGCCTCTGAGCCCGAGCT  
AAGCCATCATAT

>Theropithecus\_gelada-HERVHF\_INT(-)

-----GCTAGTGAAATTTGGTGCCGTGACTCAGACTGG  
GGGACCTCCCTTGGGAGATCAATCCCCTGTCCTCCTGCTCTTTGCTCCATGAGAAAGATCCA  
CTTACGACCTCAGGTCTCAGACCAACCAGCCCCAAGAACATCTCACCAATTTTAAACCGG  
GTAAGCAGCCTCTCTTTACTCTCTTCTCCAACCTCTCTCACTATCCCTCAACCTCTTTCTCCT  
TTCAATCTTGGTGCCACACTTCAATCTCTCCCTTCTCTTAATTTCAAGTTCCTCTCCTTTTCTG  
GTAGAGACAGAGGAGACGTGTTTTATCCGTGAACCAAAAAGTCTGACCCGGTCAACCGACT  
CGGGAAGACAGTCTTCCCTTGGTGTTAATCCCTGCAGGGACGTCTGCCTGATTATTCACCC

ACATTTTCATTGGTGTCTGATCACCACAGGGATGCCTGCCTTCGTCAATTCACCCACAGTCCCT  
 TGGTGGCAAGTCCATTGCAGGGACACCTGCTTTGGCTGCTCACCACATTGCAGCCCAGGG  
 CTGCTCACCCAC-----CCCTTCTCTCCGTGTC  
 TCTGCCCTCTCTTCTCTCCA-----CTTTCTTGGGGGGCTAGCACCCC  
 CCACCC-----CTTCTCTCTGTGTCTCTACCC-----TCTC  
 TTTTCTCTGGACTTGCCTCCTTCATTATGGGCAAACCTTCCACACCCTCCATTCCCTCCTTCTTC  
 TCCCTTAGCCTGTGTTCTCAAGAACTTAAACCTTCTTCGACTCACAACCTGACCTAAAGCCTA  
 AATGCCTTATTTTCTTCTGCAACACCGCTTGGCCCC--AATACAAACTCGAC-AATGGTTCCAA  
 ATAGCCAGAAAACGGCACTTTTCGATTCTCCATCCTACAAGATCTAGATAATTCTCGTCATAA  
 AATGGGCAAATAGTCTGAGGTGCCTGATGTCCAGGCATTCTTTTACGCATGAGTCCCTCCCT  
 GGTCTTTGTTCCCAATGCAACTCGTCCC-----AAATCTTCCTT  
 CTTTCCCTCCCGCCTGTCCCTCAGTCCCAACCCGAAGAGTTGCTGAGTCTTTCTAA--TCTT  
 CCTTTTTTACGGACCCATCTGACCTCTCCCTCCTCCCCAGGCTGCTCCTCACCAGGCCAAG  
 CCAGGTCCCAA-TTCTTCTCAGCCTCCGTTCCCCCACCCTATAATCCTTTTATCACCTCCCT  
 CCTCACACCCAGTCCGGCTTGCAGTTTCGTTTTGCAACTAGCCCTCCCTCACCTGCCCAGC  
 AATTATCTCTTAAAAATGTGG-----CTGGAGCCGAAGGCATAGTCAGGGTTAATGCTCCTTTT  
 TCTTTATCTGGCCTCTCCCAAATCAGTTAGCGTTTAGGCTCTTTTTCATCAAATATAAAAACC  
 CGGCCCAGTTCATGGCTTGTGTTGGCAGCAACCTGAGATGCTTTACTGCCCTAGACCCTGA  
 AAGGTCAAAAGGCCGTCTTATTCTCAATATACAT--TGTATTACCCAATCCACTCCTGACATTA  
 AATAAAACACCAAAAATTAAGTTCCGGGCCCTCAAACCCACAACAAGACTTAATTAACCTT  
 GCCTTCAAGGTGTACAATAATAGAGAAGAGTTGCAATTACTTGCTCCGCTGTGAGAGAAA  
 CCCCAGCCACATCTTCAGCACACAAGAACTTCAAAATGCCTAAGCCACAGCAGCCAGGCG  
 TTCTTCAGGACTTTCTCCCCAGGATCTTGCTTCAAGTGCTGGAAATCTGGCCACTGGGCC  
 AAGGAATGCCCGTAGCCCAGGATTCC-TCCTAAACTGTGTCCCATCTGTGCAGGACCCACT  
 GGAAATTGGACTGTCCAACCTGGCCCAAGGCTCTAACTGACTCCTTCCCAGATCTTCTCAGC  
 TTA--GGCTGAAGACTGATGCTGCCCGATCACCTTGGAAGCTTCCTGGACCATCACAGACGC  
 TTTGGGTAACCTTACAGTGGAGGGTAAGTCCATCCCCTTCTTAATCAATATGGAGGCTACC  
 CACTCCACATTACCTTCTTTTCAAGGGCCTGTTTCCCTTGCTCCATAAATGTTGTGGGCATT  
 GACAGCCAGGTTTCTAAACCCCTTAAACCTCCCCAGTCTGGTGCTAACTTGGACAACATT  
 CTTTTATGCACTCTTTTTAGTTATCCCCACCTGCCAGTTCCTTATTAGGCCGAGATATTTT  
 AACCAAATTGTCTGCTTCCCTGACTATTCTGGACTACAGCCACATCTCATTGCTACCTGCT  
 TCCCAACCCAAAGCCTCCTTCGCGCCTTCTCTCGTATTCCCCAACTTAACCCACGTGTAT  
 GGGACACCTCTA---CTCCCTCCCTGGCAACCAATCACCAGCCTATTACTATCCCATTAAACC  
 TAATCACCCCTTACCCCATCAATGCCAGTATCCCATCCCACAACAGGCTTTAAAGGGATTGA  
 AACCTGTTATCACTTGCCTGCTACAGTATGGGCTTCTAAACCTGTAAACTCCCCTTACAATT  
 CCCCCATTTTACCTGTCCAAAACTGGACAAGTCTTACACGTTACTTCAGGATCTGTGCCTT  
 ATCAACCAAATTGTTTTGCCTAT--CCTTGTGGTGCAACACCCATTTACTCTCCTATCCTCAAT  
 ACCTCCCTCCACAACCCATTATTCTGTTCTGGATCTCAAACATGCTTTCTTTACTATTCTTTG  
 CATCCTTCATCCAGCTTCTCTTTGCTTTCACTTGGACTGACCCTGACACCCATCAGGCTCA  
 GGAAATTACCTGGGCTGTACTGCTGCAAGGTTTCACGGACAGCCCCCATTTTGGTCAA  
 GCCCAAATTTCTTCTCATCCATTACCTATCTTGGCATAATTCTTCATGAAAACATAC--ATGCT  
 CTCCCTGCTGATCATGTCTGGCTAATCTCCCAAACCCCAACCCCTTCTACAAAACAACAACCT  
 CCTTCCTTC-GTAGGCATGGTTAGCTACTTCCACCTTTGGATACCTAGTTTTACCATCTTGACT  
 AAACCACAATGTAACTCACAAAAGGAAACCTAGCTGACCCACAGATCCTAAATCCTTTT

GCCACTCCTTTCCATTCCCTTAAAAACAGCCCTAGAAGCTGCTCCCACACTAGCTCTCCCTAA  
CTCATCCCAATCC-TTTTTCATTACACACAGTCAAAGTGCAGGGCTGTGAGGTCAAAATTCTT  
ACACAAGGATCGGGACCATGCCCTGTGGCCTTTTTATCCAAACAATTTGACCTTACTCTTTT  
AGCTTAG-CCTCATGTCTGTGTGTGGCAGCTGCTGCTTCCTTAATACTTTTCAGAGGCCCTCAA  
AATCACAAACTATGCTCAAC-----TCACTCTCTAGAGTTCTCATAACTTTCAAAATCTATTT  
TCTTCCTCACACCTGATGCACATATTCCTGCC---CCCCTCCACTACCTCTCAACAAGCCAAA  
CTCATTGCCTTAACTCAAGCCCTCACTCTTGCAAAAGGATTAAGTGTCAATATTTATACTGAC  
TCTAAATATGCCTTCCATATCCTGCACCACCATGCTGTTATATGGGCAGAAAGAAATGTCTTA  
ACTATGCAAGGGTCCCTCCATCATTAAATGCCTCTTTAATAAAAACTCTTCTCAAAGCTGCTTTA  
CTTCCAAAGGAAGCTGGAATCATTCACTGCAAGGGCCAGCAAAAGGCATCAGATCCCATTG  
CTCAGGACAATGCTTATGCTGATACGGTAGCTAAA-AAGCAGCTAGCATTCCAACCTTCTATCC  
CTCATGGCAGTTTTTCTCCTTCGCATTTGGCCACTCCCACCTACCCCCCACTGAAACTTCC  
ACCTATCAGTCTCTTCCCACGCAAGGCAAATGGTTCTTGGACCAAGGAAAATATCTCCTTCC  
AGCCTCACAGGCCCATTTCTATTCTGTCATATTTCAACCTCTTCCATGTAGGTTACAAGCT  
GCTAGCCCATCTCTTAGAACCTCTCATTTCTTTCCATTGTGGAGATCTATCCTCAAGGAAAT  
CACTTCTCAG-TGTTCCATCTGCTATTCTACTACTCCTCAGGGATTGTTCAAGCCCCCTCCCT  
TCCCTACACATCAAGCTCGGTGATTTGCCCTGCCAGGACTGGCAAATTGACTTTACTCAC  
ATGCCCCAAGTCAGGAACTAAAATACCTCTTGGTCTAGGTAGACACTTTCACTGCACAGG  
TAGAGGCCTTTCCCACAGGGTCTGCGAAGGCCACCATGGTCATTTCTTCCCTTCTGTCAGGT  
ATAATTCCTCGGTTTGACCTTCCTACCTCTATACAGTCCAATAATGGACCAGCCTTTGTTAGT  
TAAATCACCCAACCAGTTTCTCAGGCTCTTAG---TATTCAGTGGAATTTATACCCCTTACT  
ATCCTCAGTCTTCAGGAAAGGTA----GGAACGGGCTAATGGTCTTTTAAAAACACACCTCAC  
CAATCTCAGCCACCAACTTAAAAAGGACTAGACAATACTTTTACCCTTTCCCTTCTCAAAA  
TTCGGGCCTGTCTCGGGATGCTACAGGGTACAGCCCATTTGAGCTTCTGTATGAACCCTCC  
TATTTATTAGGCCCCAGTCTTATTCCAGACACCAGCCCAACTTGGACTGTGCCCCAAAACT  
TGTCATCCCTACTCTCTTCTGTCTAGTCATACTCCTATTACCGTTCTCAAATACTCATAAATG  
CCCTGCTCTTGTTTACACTGCCGGTTTACACTGTTTCTCCAAGCCATCACAGCTGATATCTCC  
TGGTGCTAT-CCCAAAGTCCACTCTTAACTCCCTCTTAAAGTAAATAAATAATCTTTGCTGG  
CAGGGCTATGCTGAACCTCCTTGGGCACTCTCTAATTGGATGTCCTGGATCCTCCCAATTCTT  
AGTCCTTTAATACCTGTTTTTCTCCTTCTCTTATTCAGACCTTTT-GTCTTCCGTTTAGTTTTTC  
AATTCATACAAAAGTCTTCCAGGCCATCACCAATCATTCTATATGATAAATGTCCTTCTAA  
CAACCCCAACAATATCACCCCTTATCACAAAATCTTCTTCAGCTTAATCTCTCCCACTCTGGG  
TTTCCATGCCACCCCTAATCCTGCATGAAGCAGCCCTGAGAAACATCACCCATTATCTCTGC  
ATGCCACCCCCCAAAAAATTTCTGC-TGCCCAACACTTCAATACTATTTTGATTATTTTCT  
TATTAATATAAGAAGGCAG-----

# Supplementary data S7 The LTRs' blastn results of possible HERVs which were involved in host

## gene recombination

| Query ID                                          | qLTR-type | Subject ID | sLTR-type | % identity   | alignment    | length   |
|---------------------------------------------------|-----------|------------|-----------|--------------|--------------|----------|
| mismatches                                        | gap opens | q. start   | q. end    | s. start     | s. end       | evaluate |
| bit                                               | score     | qcovhsp    |           |              |              |          |
| Cercopithecus_atys_KQ010004.1:3853153-3859140     | HERVHF    | 3LTR       |           |              |              |          |
| Cercopithecus_atys_KQ010004.1:8290204-8294490     | HERVHF    | 3LTR       | 90.448    | 335          | 27           | 4        |
| 15                                                | 347       | 10         | 341       | 8.37E-129447 | 96           |          |
| Cercopithecus_atys_KQ010004.1:3853153-3859140     | HERVHF    | 5LTR       |           |              |              |          |
| Cercopithecus_atys_KQ010004.1:8290204-8294490     | HERVHF    | 5LTR       | 90.909    | 341          | 26           | 5        |
| 5                                                 | 340       | 3          | 343       | 4.53E-132458 | 99           |          |
| Cercopithecus_atys_KQ010004.1:3853153-3859140     | HERVHF    | 3LTR       |           |              |              |          |
| Cercopithecus_atys_KQ012885.1:26400757-26405972   | HERVHF    | 3LTR       | 92.059    | 340          | 24           |          |
| 2                                                 | 10        | 347        | 39        | 377          | 9.54E-141486 | 97       |
| Cercopithecus_atys_KQ010004.1:3853153-3859140     | HERVHF    | 5LTR       |           |              |              |          |
| Cercopithecus_atys_KQ012885.1:26400757-26405972   | HERVHF    | 5LTR       | 89.796    | 343          | 32           |          |
| 3                                                 | 1         | 340        | 29        | 371          | 6.72E-130451 | 100      |
| Chlorocebus_aethiops.fasta_ctg370:1321412-1326733 | HERVK     | 5LTR       |           |              |              |          |
| Chlorocebus_aethiops.fasta_ctg4:24809931-24814277 | HERVK     | 3LTR       | 87.983    | 466          | 56           |          |
| 0                                                 | 1         | 466        | 49        | 514          | 3.75E-172589 | 100      |
| Chlorocebus_aethiops.fasta_ctg370:1321412-1326733 | HERVK     | 3LTR       |           |              |              |          |
| Chlorocebus_aethiops.fasta_ctg4:24809931-24814277 | HERVK     | 5LTR       | 89.009    | 464          | 48           |          |
| 2                                                 | 1         | 462        | 44        | 506          | 5.96E-176601 | 99       |
| Chlorocebus_sabaeus_CM001959.2:45511215-45516073  | HERVHF    | 3LTR       |           |              |              |          |
| Chlorocebus_sabaeus_CM001962.2:64631446-64636282  | HERVHF    | 3LTR       | 93.679    | 443          |              |          |
| 24                                                | 3         | 1          | 440       | 13           | 454          | 0        |
| 664                                               | 100       |            |           |              |              |          |
| Chlorocebus_sabaeus_CM001959.2:45511215-45516073  | HERVHF    | 5LTR       |           |              |              |          |
| Chlorocebus_sabaeus_CM001962.2:64631446-64636282  | HERVHF    | 5LTR       | 92.07     | 454          |              |          |
| 35                                                | 1         | 1          | 453       | 1            | 454          | 0        |
| 654                                               | 99        |            |           |              |              |          |
| Gorilla_gorilla_gorilla_chr1:202016017-202021023  | HERVHF    | 5LTR       |           |              |              |          |
| Gorilla_gorilla_gorilla_chr13:36959576-36964653   | HERVHF    | 3LTR       | 96.561    | 378          | 12           | 1        |
| 1                                                 | 377       | 20         | 397       | 2.88E-180620 | 97           |          |
| Gorilla_gorilla_gorilla_chr1:202016017-202021023  | HERVHF    | 3LTR       |           |              |              |          |
| Gorilla_gorilla_gorilla_chr13:36959576-36964653   | HERVHF    | 5LTR       | 96.505    | 372          | 13           | 0        |
| 1                                                 | 372       | 19         | 390       | 4.08E-178613 | 100          |          |
| Gorilla_gorilla_gorilla_chr10:48560137-48563743   | HERVHF    | 5LTR       |           |              |              |          |
| Gorilla_gorilla_gorilla_chr16:50623460-50628109   | HERVHF    | 3LTR       | 95.086    | 407          | 20           | 0        |
| 1                                                 | 407       | 12         | 418       | 0            | 645          | 100      |
| Gorilla_gorilla_gorilla_chr10:48560137-48563743   | HERVHF    | 3LTR       |           |              |              |          |
| Gorilla_gorilla_gorilla_chr16:50623460-50628109   | HERVHF    | 5LTR       | 94.749    | 419          | 18           | 2        |
| 2                                                 | 416       | 1          | 419       | 0            | 652          | 99       |
| Gorilla_gorilla_gorilla_chr20:12290537-12295740   | HERVHF    | 5LTR       |           |              |              |          |

Gorilla\_gorilla\_gorilla\_chr4:179641013-179645038\_HERVHF 3LTR 96.296 324 11  
 1 7 329 1 324 1.05E-152527 98  
 Gorilla\_gorilla\_gorilla\_chr20:12290537-12295740\_HERVHF 3LTR  
 Gorilla\_gorilla\_gorilla\_chr4:179641013-179645038\_HERVHF 5LTR 97.742 310 5  
 2 9 318 1 308 1.53E-150521 96  
 Gorilla\_gorilla\_gorilla\_chr20:12290537-12295740\_HERVHF 3LTR  
 Gorilla\_gorilla\_gorilla\_chr5:81531035-81536265\_HERVHF 3LTR 97.152 316 7 2  
 3 318 8 321 4.37E-151523 98  
 Gorilla\_gorilla\_gorilla\_chr20:12290537-12295740\_HERVHF 5LTR  
 Gorilla\_gorilla\_gorilla\_chr5:81531035-81536265\_HERVHF 5LTR 97.273 330 8 1  
 1 329 1 330 9.22E-160552 100  
 Gorilla\_gorilla\_gorilla\_chr2b:110918228-110923107\_HERVHF 3LTR  
 Gorilla\_gorilla\_gorilla\_chr3:8235871-8240734\_HERVHF 3LTR 93.932 412 24 1  
 14 425 1 411 0 627 97  
 Gorilla\_gorilla\_gorilla\_chr2b:110918228-110923107\_HERVHF 5LTR  
 Gorilla\_gorilla\_gorilla\_chr3:8235871-8240734\_HERVHF 5LTR 93.447 412 26 1  
 2 412 1 412 9.57E-180618 99  
 Gorilla\_gorilla\_gorilla\_chr3:21293800-21298167\_HERVHF 5LTR  
 Gorilla\_gorilla\_gorilla\_chr3:8235871-8240734\_HERVHF 3LTR 90.821 414 24 4  
 4 407 1 410 1.23E-165571 99  
 Gorilla\_gorilla\_gorilla\_chr3:21293800-21298167\_HERVHF 3LTR  
 Gorilla\_gorilla\_gorilla\_chr3:8235871-8240734\_HERVHF 5LTR 91.198 409 24 2  
 6 403 4 411 8.21E-168578 99  
 Gorilla\_gorilla\_gorilla\_chr3:46413847-46418893\_HERVHF 5LTR  
 Gorilla\_gorilla\_gorilla\_chr4:75982275-75987316\_HERVHF 3LTR 95.768 449 18 1  
 6 454 1 448 0 721 98  
 Gorilla\_gorilla\_gorilla\_chr3:46413847-46418893\_HERVHF 3LTR  
 Gorilla\_gorilla\_gorilla\_chr4:75982275-75987316\_HERVHF 5LTR 95.806 453 18 1  
 3 454 1 453 0 728 99  
 Gorilla\_gorilla\_gorilla\_chr3:78395594-78400678\_HERVHF 3LTR  
 Gorilla\_gorilla\_gorilla\_chr4:75982275-75987316\_HERVHF 3LTR 94.457 451 24 1  
 1 451 2 451 0 698 99  
 Gorilla\_gorilla\_gorilla\_chr3:78395594-78400678\_HERVHF 5LTR  
 Gorilla\_gorilla\_gorilla\_chr4:75982275-75987316\_HERVHF 5LTR 93.805 452 27 1  
 1 451 2 453 0 686 100  
 Gorilla\_gorilla\_gorilla\_chr3:78395594-78400678\_HERVHF 5LTR  
 Gorilla\_gorilla\_gorilla\_chr4:8487186-8492546\_HERVHF 3LTR 94.9 451 22 1 1  
 451 2 451 0 707 100  
 Gorilla\_gorilla\_gorilla\_chr3:78395594-78400678\_HERVHF 3LTR  
 Gorilla\_gorilla\_gorilla\_chr4:8487186-8492546\_HERVHF 5LTR 93.57 451 29 0  
 1 451 2 452 0 683 99  
 Gorilla\_gorilla\_gorilla\_chr3:78395594-78400678\_HERVHF 3LTR  
 Gorilla\_gorilla\_gorilla\_chr4:88917361-88922424\_HERVHF 3LTR 93.584 452 29 0  
 1 452 1 452 0 685 100

Gorilla\_gorilla\_gorilla\_chr3:78395594-78400678\_HERVHF 5LTR  
 Gorilla\_gorilla\_gorilla\_chr4:88917361-88922424\_HERVHF 5LTR 93.556 450 27 1  
 2 451 1 448 0 679 99

Gorilla\_gorilla\_gorilla\_chr6:110555930-110560849\_HERVHF 3LTR  
 Gorilla\_gorilla\_gorilla\_chr6:126863433-126868223\_HERVHF 3LTR 94.053 454 27  
 0 5 458 1 454 0 698 99

Gorilla\_gorilla\_gorilla\_chr6:110555930-110560849\_HERVHF 5LTR  
 Gorilla\_gorilla\_gorilla\_chr6:126863433-126868223\_HERVHF 5LTR 94.26 453 26  
 0 6 458 1 453 0 700 99

Gorilla\_gorilla\_gorilla\_chr6:110555930-110560849\_HERVHF 3LTR  
 Gorilla\_gorilla\_gorilla\_chr9:95243879-95249741\_HERVHF 3LTR 94.493 454 24 1  
 6 459 1 453 0 703 99

Gorilla\_gorilla\_gorilla\_chr6:110555930-110560849\_HERVHF 5LTR  
 Gorilla\_gorilla\_gorilla\_chr9:95243879-95249741\_HERVHF 5LTR 95.585 453 19 1  
 6 458 1 452 0 724 99

Gorilla\_gorilla\_gorilla\_chr8:110324395-110329380\_HERVHF 5LTR  
 Gorilla\_gorilla\_gorilla\_chr9:95243879-95249741\_HERVHF 3LTR 95.364 453 18 2  
 24 474 1 452 0 717 95

Gorilla\_gorilla\_gorilla\_chr8:110324395-110329380\_HERVHF 3LTR  
 Gorilla\_gorilla\_gorilla\_chr9:95243879-95249741\_HERVHF 5LTR 95.575 452 17 2  
 17 466 1 451 0 719 97

Gorilla\_gorilla\_gorilla\_chr9:48707643-48713261\_HERVHF 3LTR  
 Gorilla\_gorilla\_gorilla\_chrX:110023142-110028702\_HERVHF 3LTR 94.581 406 21  
 1 1 405 1 406 0 630 100

Gorilla\_gorilla\_gorilla\_chr9:48707643-48713261\_HERVHF 5LTR  
 Gorilla\_gorilla\_gorilla\_chrX:110023142-110028702\_HERVHF 5LTR 94.686 414 21  
 1 1 413 1 414 0 645 100

Gorilla\_gorilla\_gorilla\_chr9:53509489-53514564\_HERVHF 3LTR  
 Gorilla\_gorilla\_gorilla\_chr9:95243879-95249741\_HERVHF 3LTR 95.362 345 15 1  
 1 345 2 345 1.09E-158547 100

Gorilla\_gorilla\_gorilla\_chr9:53509489-53514564\_HERVHF 5LTR  
 Gorilla\_gorilla\_gorilla\_chr9:95243879-95249741\_HERVHF 5LTR 94.169 343 19 1  
 1 343 4 345 3.56E-152526 99

Gorilla\_gorilla\_gorilla\_chr9:53509489-53514564\_HERVHF 3LTR  
 Gorilla\_gorilla\_gorilla\_chrX:81105621-81110902\_HERVHF 3LTR 94.509 346 18 1  
 1 345 1 346 6.89E-155535 100

Gorilla\_gorilla\_gorilla\_chr9:53509489-53514564\_HERVHF 5LTR  
 Gorilla\_gorilla\_gorilla\_chrX:81105621-81110902\_HERVHF 5LTR 93.86 342 21 0  
 1 342 3 344 4.34E-151523 99

Gorilla\_gorilla\_gorilla\_chr9:53509489-53514564\_HERVHF 5LTR  
 Gorilla\_gorilla\_gorilla\_chrX:88109970-88115344\_HERVHF 3LTR 93.878 343 20 1  
 1 343 4 345 1.51E-150521 99

Gorilla\_gorilla\_gorilla\_chr9:53509489-53514564\_HERVHF 3LTR  
 Gorilla\_gorilla\_gorilla\_chrX:88109970-88115344\_HERVHF 5LTR 94.22 346 19 1

1 345 2 347 8.4E-154 531 100  
 Gorilla\_gorilla\_gorilla\_chr9:60838551-60843495\_HERVHF 3LTR  
 Gorilla\_gorilla\_gorilla\_chr9:95243879-95249741\_HERVHF 3LTR 94.69 452 23 1  
 1 452 2 452 0 704 99  
 Gorilla\_gorilla\_gorilla\_chr9:60838551-60843495\_HERVHF 5LTR  
 Gorilla\_gorilla\_gorilla\_chr9:95243879-95249741\_HERVHF 5LTR 95.333 450 19 2  
 1 449 4 452 0 710 99  
 Gorilla\_gorilla\_gorilla\_chrX:107821824-107827046\_HERVHF 3LTR  
 Gorilla\_gorilla\_gorilla\_chrX:107950953-107956083\_HERVHF 3LTR 96.026 302 11  
 1 2 303 76 376 7.85E-141488 99  
 Gorilla\_gorilla\_gorilla\_chrX:107821824-107827046\_HERVHF 5LTR  
 Gorilla\_gorilla\_gorilla\_chrX:107950953-107956083\_HERVHF 5LTR 95.752 306 9  
 3 1 302 90 395 9.5E-140 484 100  
 Homo\_sapiens\_1:5045144-5052648\_HERVHF 5LTR  
 Homo\_sapiens\_13:51170315-51174556\_HERVHF 3LTR 96.131 336 13 0 1 336  
 13 348 3.9E-158 548 100  
 Homo\_sapiens\_1:5045144-5052648\_HERVHF 3LTR  
 Homo\_sapiens\_13:51170315-51174556\_HERVHF 5LTR 94.857 350 18 0 3 352  
 1 350 3.36E-159551 99  
 Homo\_sapiens\_1:5045144-5052648\_HERVHF 3LTR  
 Homo\_sapiens\_16:60078989-60084128\_HERVHF 3LTR 94.571 350 19 0 3 352  
 1 350 1.43E-157546 99  
 Homo\_sapiens\_1:5045144-5052648\_HERVHF 5LTR  
 Homo\_sapiens\_16:60078989-60084128\_HERVHF 5LTR 96.131 336 13 0 1 336  
 12 347 3.9E-158 548 100  
 Homo\_sapiens\_1:5045144-5052648\_HERVHF 3LTR  
 Homo\_sapiens\_19:53831857-53836889\_HERVHF 3LTR 95.455 352 16 0 1 352  
 8 359 5.33E-163563 100  
 Homo\_sapiens\_1:5045144-5052648\_HERVHF 5LTR  
 Homo\_sapiens\_19:53831857-53836889\_HERVHF 5LTR 96.726 336 11 0 1 336  
 13 348 7.52E-161557 100  
 Homo\_sapiens\_1:5045144-5052648\_HERVHF 5LTR  
 Homo\_sapiens\_2:215922762-215927674\_HERVHF3LTR 95.858 338 12 1 1 336  
 13 350 4.75E-157545 100  
 Homo\_sapiens\_1:5045144-5052648\_HERVHF 3LTR  
 Homo\_sapiens\_2:215922762-215927674\_HERVHF5LTR 94.886 352 16 1 3 352  
 1 352 3.36E-159552 99  
 Homo\_sapiens\_1:5045144-5052648\_HERVHF 5LTR  
 Homo\_sapiens\_4:125562071-125567006\_HERVHF3LTR 96.429 336 12 0 1 336  
 15 350 9.17E-160553 100  
 Homo\_sapiens\_1:5045144-5052648\_HERVHF 3LTR  
 Homo\_sapiens\_4:125562071-125567006\_HERVHF5LTR 95.739 352 15 0 1 352  
 1 352 4.37E-164568 100  
 Homo\_sapiens\_1:5045144-5052648\_HERVHF 3LTR

|                                           |      |        |     |    |   |   |     |
|-------------------------------------------|------|--------|-----|----|---|---|-----|
| Homo_sapiens_6:90670654-90675059_HERVHF   | 3LTR | 94.602 | 352 | 19 | 0 | 1 | 352 |
| 7 358 1.17E-158550                        | 100  |        |     |    |   |   |     |
| Homo_sapiens_1:5045144-5052648_HERVHF     | 5LTR |        |     |    |   |   |     |
| Homo_sapiens_6:90670654-90675059_HERVHF   | 5LTR | 97.024 | 336 | 10 | 0 | 1 | 336 |
| 17 352 1.77E-162562                       | 100  |        |     |    |   |   |     |
| Homo_sapiens_1:5045144-5052648_HERVHF     | 3LTR |        |     |    |   |   |     |
| Homo_sapiens_9:121790452-121796319_HERVHF | 3LTR | 96.011 | 351 | 13 | 1 | 2 | 352 |
| 1 350 4.37E-164567                        | 99   |        |     |    |   |   |     |
| Homo_sapiens_1:5045144-5052648_HERVHF     | 5LTR |        |     |    |   |   |     |
| Homo_sapiens_9:121790452-121796319_HERVHF | 5LTR | 97.024 | 336 | 8  | 2 | 1 | 336 |
| 14 347 2.63E-160554                       | 100  |        |     |    |   |   |     |
| Homo_sapiens_1:5045144-5052648_HERVHF     | 5LTR |        |     |    |   |   |     |
| Homo_sapiens_X:87682131-87687194_HERVHF   | 3LTR | 96.429 | 336 | 12 | 0 | 1 | 336 |
| 13 348 9.17E-160553                       | 100  |        |     |    |   |   |     |
| Homo_sapiens_1:5045144-5052648_HERVHF     | 3LTR |        |     |    |   |   |     |
| Homo_sapiens_X:87682131-87687194_HERVHF   | 5LTR | 95.143 | 350 | 16 | 1 | 3 | 352 |
| 1 349 3.36E-159552                        | 99   |        |     |    |   |   |     |
| Homo_sapiens_1:99509965-99515002_HERVHF   | 3LTR |        |     |    |   |   |     |
| Homo_sapiens_10:53493177-53504276_HERVHF  | 3LTR | 95.109 | 368 | 12 | 3 | 1 | 362 |
| 82 449 3.03E-166575                       | 100  |        |     |    |   |   |     |
| Homo_sapiens_1:99509965-99515002_HERVHF   | 5LTR |        |     |    |   |   |     |
| Homo_sapiens_10:53493177-53504276_HERVHF  | 5LTR | 95.946 | 370 | 13 | 2 | 1 | 370 |
| 88 455 1.16E-171593                       | 99   |        |     |    |   |   |     |
| Homo_sapiens_1:99509965-99515002_HERVHF   | 5LTR |        |     |    |   |   |     |
| Homo_sapiens_10:6797535-6802501_HERVHF    | 3LTR | 94.609 | 371 | 18 | 2 | 1 | 371 |
| 85 453 1.09E-165572                       | 99   |        |     |    |   |   |     |
| Homo_sapiens_1:99509965-99515002_HERVHF   | 3LTR |        |     |    |   |   |     |
| Homo_sapiens_10:6797535-6802501_HERVHF    | 5LTR | 94.837 | 368 | 13 | 3 | 1 | 362 |
| 83 450 3.7E-165 571                       | 100  |        |     |    |   |   |     |
| Homo_sapiens_1:99509965-99515002_HERVHF   | 5LTR |        |     |    |   |   |     |
| Homo_sapiens_16:60078989-60084128_HERVHF  | 3LTR | 95.699 | 372 | 14 | 2 | 1 | 372 |
| 83 452 1.16E-171592                       | 100  |        |     |    |   |   |     |
| Homo_sapiens_1:99509965-99515002_HERVHF   | 3LTR |        |     |    |   |   |     |
| Homo_sapiens_16:60078989-60084128_HERVHF  | 5LTR | 95.38  | 368 | 11 | 3 | 1 | 362 |
| 79 446 7.13E-168580                       | 100  |        |     |    |   |   |     |
| Homo_sapiens_1:99509965-99515002_HERVHF   | 3LTR |        |     |    |   |   |     |
| Homo_sapiens_20:12754276-12759162_HERVHF  | 3LTR | 95.652 | 368 | 10 | 3 | 1 | 362 |
| 102 469 5.86E-169584                      | 100  |        |     |    |   |   |     |
| Homo_sapiens_1:99509965-99515002_HERVHF   | 5LTR |        |     |    |   |   |     |
| Homo_sapiens_20:12754276-12759162_HERVHF  | 5LTR | 94.624 | 372 | 18 | 2 | 1 | 372 |
| 105 474 3.12E-166574                      | 100  |        |     |    |   |   |     |
| Homo_sapiens_1:99509965-99515002_HERVHF   | 3LTR |        |     |    |   |   |     |
| Homo_sapiens_3:112418865-112422911_HERVHF | 3LTR | 95.393 | 369 | 10 | 4 | 1 | 362 |
| 82 450 2.49E-167578                       | 100  |        |     |    |   |   |     |



|                                               |              |         |     |    |   |    |     |
|-----------------------------------------------|--------------|---------|-----|----|---|----|-----|
| Homo_sapiens_1:99509965-99515002_HERVHF 5LTR  |              |         |     |    |   |    |     |
| Homo_sapiens_3:112418865-112422911_HERVHF     | 5LTR         | 94.609  | 371 | 18 | 2 | 1  | 371 |
| 87 455                                        | 1.09E-165572 | 99      |     |    |   |    |     |
| Homo_sapiens_1:99509965-99515002_HERVHF 5LTR  |              |         |     |    |   |    |     |
| Homo_sapiens_6:125702300-125707310_HERVHF3LTR |              | 94.624  | 372 | 15 | 3 | 1  | 372 |
| 87 453                                        | 1.09E-165572 | 100     |     |    |   |    |     |
| Homo_sapiens_1:99509965-99515002_HERVHF 3LTR  |              |         |     |    |   |    |     |
| Homo_sapiens_6:125702300-125707310_HERVHF5LTR |              | 94.837  | 368 | 13 | 3 | 1  | 362 |
| 83 450                                        | 3.7E-165     | 571 100 |     |    |   |    |     |
| Homo_sapiens_1:99509965-99515002_HERVHF 5LTR  |              |         |     |    |   |    |     |
| Homo_sapiens_9:99670236-99675451_HERVHF 3LTR  |              | 95.43   | 372 | 15 | 2 | 1  | 372 |
| 83 452                                        | 4.95E-170588 | 100     |     |    |   |    |     |
| Homo_sapiens_1:99509965-99515002_HERVHF 3LTR  |              |         |     |    |   |    |     |
| Homo_sapiens_9:99670236-99675451_HERVHF 5LTR  |              | 95.109  | 368 | 12 | 3 | 1  | 362 |
| 80 447                                        | 3.03E-166575 | 100     |     |    |   |    |     |
| Homo_sapiens_1:99509965-99515002_HERVHF 3LTR  |              |         |     |    |   |    |     |
| Homo_sapiens_X:92824882-92828895_HERVHF 3LTR  |              | 94.837  | 368 | 13 | 3 | 1  | 362 |
| 80 447                                        | 3.7E-165     | 571 100 |     |    |   |    |     |
| Homo_sapiens_1:99509965-99515002_HERVHF 5LTR  |              |         |     |    |   |    |     |
| Homo_sapiens_X:92824882-92828895_HERVHF 5LTR  |              | 95.722  | 374 | 12 | 3 | 1  | 372 |
| 83 454                                        | 1.16E-171593 | 100     |     |    |   |    |     |
| Homo_sapiens_10:6629975-6635084_HERVHF 3LTR   |              |         |     |    |   |    |     |
| Homo_sapiens_10:6797535-6802501_HERVHF 3LTR   |              | 95.11   | 409 | 18 | 1 | 1  | 407 |
| 45 453                                        | 0 645        | 98      |     |    |   |    |     |
| Homo_sapiens_10:6629975-6635084_HERVHF 5LTR   |              |         |     |    |   |    |     |
| Homo_sapiens_10:6797535-6802501_HERVHF 5LTR   |              | 98.241  | 398 | 7  | 0 | 1  | 398 |
| 57 454                                        | 0 687        | 99      |     |    |   |    |     |
| Homo_sapiens_10:6629975-6635084_HERVHF 5LTR   |              |         |     |    |   |    |     |
| Homo_sapiens_16:60078989-60084128_HERVHF 3LTR |              | 97.243  | 399 | 11 | 0 | 1  | 399 |
| 54 452                                        | 0 671        | 99      |     |    |   |    |     |
| Homo_sapiens_10:6629975-6635084_HERVHF 3LTR   |              |         |     |    |   |    |     |
| Homo_sapiens_16:60078989-60084128_HERVHF 5LTR |              | 95.146  | 412 | 18 | 1 | 1  | 410 |
| 42 453                                        | 0 651        | 99      |     |    |   |    |     |
| Homo_sapiens_10:6629975-6635084_HERVHF 5LTR   |              |         |     |    |   |    |     |
| Homo_sapiens_6:125702300-125707310_HERVHF3LTR |              | 96.992  | 399 | 9  | 1 | 1  | 399 |
| 58 453                                        | 0 664        | 99      |     |    |   |    |     |
| Homo_sapiens_10:6629975-6635084_HERVHF 3LTR   |              |         |     |    |   |    |     |
| Homo_sapiens_6:125702300-125707310_HERVHF5LTR |              | 95.11   | 409 | 18 | 1 | 1  | 407 |
| 46 454                                        | 0 645        | 98      |     |    |   |    |     |
| Homo_sapiens_10:96733309-96736169_HERVHF 3LTR |              |         |     |    |   |    |     |
| Homo_sapiens_6:144923609-144928414_HERVHF3LTR |              | 96.865  | 319 | 10 | 0 | 6  | 324 |
| 1 319                                         | 2.88E-153531 | 98      |     |    |   |    |     |
| Homo_sapiens_10:96733309-96736169_HERVHF 5LTR |              |         |     |    |   |    |     |
| Homo_sapiens_6:144923609-144928414_HERVHF5LTR |              | 97.394  | 307 | 8  | 0 | 17 | 323 |

9 315 1.81E-149518 95  
 Homo\_sapiens\_11:23887605-23892534\_HERVHF 3LTR  
 Homo\_sapiens\_2:224225730-224230587\_HERVHF3LTR 93.939 330 16 2 1 326  
 57 386 4.98E-144500 99  
 Homo\_sapiens\_11:23887605-23892534\_HERVHF 5LTR  
 Homo\_sapiens\_2:224225730-224230587\_HERVHF5LTR 93.06 317 16 3 18 331  
 73 386 3.6E-133 465 95  
 Homo\_sapiens\_11:23887605-23892534\_HERVHF 3LTR  
 Homo\_sapiens\_2:67331916-67337203\_HERVHF 3LTR 94.611 334 13 3 1 330  
 57 389 7.89E-148513 100  
 Homo\_sapiens\_11:23887605-23892534\_HERVHF 5LTR  
 Homo\_sapiens\_2:67331916-67337203\_HERVHF 5LTR 93.651 315 16 3 18 330  
 73 385 2.95E-134469 95  
 Homo\_sapiens\_11:23887605-23892534\_HERVHF 5LTR  
 Homo\_sapiens\_8:131741164-131746225\_HERVHF3LTR 93.038 316 18 3 18 331  
 73 386 4.38E-132462 95  
 Homo\_sapiens\_11:23887605-23892534\_HERVHF 3LTR  
 Homo\_sapiens\_8:131741164-131746225\_HERVHF5LTR 91.94 335 18 5 1 330  
 62 392 2.94E-134469 100  
 Homo\_sapiens\_12:11462625-11467569\_HERVHF 3LTR  
 Homo\_sapiens\_2:215922762-215927674\_HERVHF3LTR 95.364 453 18 2 4 453  
 1 453 0 717 99  
 Homo\_sapiens\_12:11462625-11467569\_HERVHF 5LTR  
 Homo\_sapiens\_2:215922762-215927674\_HERVHF5LTR 96.018 452 16 1 8 457  
 1 452 0 732 98  
 Homo\_sapiens\_12:11462625-11467569\_HERVHF 5LTR  
 Homo\_sapiens\_6:125702300-125707310\_HERVHF3LTR 95.585 453 15 2 7 457  
 2 451 0 723 99  
 Homo\_sapiens\_12:11462625-11467569\_HERVHF 3LTR  
 Homo\_sapiens\_6:125702300-125707310\_HERVHF5LTR 95.796 452 18 1 3 453  
 3 454 0 727 99  
 Homo\_sapiens\_12:72703674-72708522\_HERVHF 5LTR  
 Homo\_sapiens\_16:60078989-60084128\_HERVHF 3LTR 95.575 452 20 0 10 461  
 1 452 0 726 98  
 Homo\_sapiens\_12:72703674-72708522\_HERVHF 3LTR  
 Homo\_sapiens\_16:60078989-60084128\_HERVHF 5LTR 95.982 448 15 3 2 446  
 1 448 0 717 99  
 Homo\_sapiens\_13:36316772-36321823\_HERVHF 3LTR  
 Homo\_sapiens\_13:51170315-51174556\_HERVHF 3LTR 96.739 368 12 0 1 368  
 83 450 4.29E-177610 100  
 Homo\_sapiens\_13:36316772-36321823\_HERVHF 5LTR  
 Homo\_sapiens\_13:51170315-51174556\_HERVHF 5LTR 95.676 370 13 1 1 367  
 80 449 3.3E-172 594 99  
 Homo\_sapiens\_13:36316772-36321823\_HERVHF 3LTR

|                                               |        |     |    |   |   |     |
|-----------------------------------------------|--------|-----|----|---|---|-----|
| Homo_sapiens_16:60078989-60084128_HERVHF 3LTR | 96.196 | 368 | 14 | 0 | 1 | 368 |
| 83 450 2.22E-174601 100                       |        |     |    |   |   |     |
| Homo_sapiens_13:36316772-36321823_HERVHF 5LTR |        |     |    |   |   |     |
| Homo_sapiens_16:60078989-60084128_HERVHF 5LTR | 94.906 | 373 | 14 | 2 | 1 | 368 |
| 79 451 5.96E-169583 100                       |        |     |    |   |   |     |
| Homo_sapiens_13:36316772-36321823_HERVHF 5LTR |        |     |    |   |   |     |
| Homo_sapiens_19:53831857-53836889_HERVHF 3LTR | 94.638 | 373 | 15 | 2 | 1 | 368 |
| 89 461 2.53E-167579 100                       |        |     |    |   |   |     |
| Homo_sapiens_13:36316772-36321823_HERVHF 3LTR |        |     |    |   |   |     |
| Homo_sapiens_19:53831857-53836889_HERVHF 5LTR | 95.924 | 368 | 15 | 0 | 1 | 368 |
| 83 450 9.44E-173597 100                       |        |     |    |   |   |     |
| Homo_sapiens_13:36316772-36321823_HERVHF 5LTR |        |     |    |   |   |     |
| Homo_sapiens_2:215922762-215927674_HERVHF3LTR | 95.174 | 373 | 13 | 2 | 1 | 368 |
| 82 454 4.89E-170588 100                       |        |     |    |   |   |     |
| Homo_sapiens_13:36316772-36321823_HERVHF 3LTR |        |     |    |   |   |     |
| Homo_sapiens_2:215922762-215927674_HERVHF5LTR | 95.652 | 368 | 16 | 0 | 1 | 368 |
| 85 452 1.15E-171592 100                       |        |     |    |   |   |     |
| Homo_sapiens_13:36316772-36321823_HERVHF 3LTR |        |     |    |   |   |     |
| Homo_sapiens_2:71086810-71090545_HERVHF 3LTR  | 95.38  | 368 | 17 | 0 | 1 | 368 |
| 85 452 4.89E-170588 100                       |        |     |    |   |   |     |
| Homo_sapiens_13:36316772-36321823_HERVHF 5LTR |        |     |    |   |   |     |
| Homo_sapiens_2:71086810-71090545_HERVHF 5LTR  | 94.865 | 370 | 16 | 1 | 1 | 367 |
| 83 452 7.26E-168581 99                        |        |     |    |   |   |     |
| Homo_sapiens_13:36316772-36321823_HERVHF 3LTR |        |     |    |   |   |     |
| Homo_sapiens_2:76574075-76579252_HERVHF 3LTR  | 94.565 | 368 | 20 | 0 | 1 | 368 |
| 84 451 3.09E-166574 100                       |        |     |    |   |   |     |
| Homo_sapiens_13:36316772-36321823_HERVHF 5LTR |        |     |    |   |   |     |
| Homo_sapiens_2:76574075-76579252_HERVHF 5LTR  | 94.624 | 372 | 15 | 2 | 1 | 367 |
| 81 452 8.84E-167577 99                        |        |     |    |   |   |     |
| Homo_sapiens_13:36316772-36321823_HERVHF 5LTR |        |     |    |   |   |     |
| Homo_sapiens_20:12754276-12759162_HERVHF 3LTR | 95.393 | 369 | 12 | 2 | 1 | 364 |
| 102 470 1.71E-169585 99                       |        |     |    |   |   |     |
| Homo_sapiens_13:36316772-36321823_HERVHF 3LTR |        |     |    |   |   |     |
| Homo_sapiens_20:12754276-12759162_HERVHF 5LTR | 95.924 | 368 | 15 | 0 | 1 | 368 |
| 105 472 9.44E-173597 100                      |        |     |    |   |   |     |
| Homo_sapiens_13:36316772-36321823_HERVHF 5LTR |        |     |    |   |   |     |
| Homo_sapiens_3:112418865-112422911_HERVHF3LTR | 94.385 | 374 | 15 | 3 | 1 | 368 |
| 82 455 1.08E-165572 100                       |        |     |    |   |   |     |
| Homo_sapiens_13:36316772-36321823_HERVHF 3LTR |        |     |    |   |   |     |
| Homo_sapiens_3:112418865-112422911_HERVHF5LTR | 95.924 | 368 | 15 | 0 | 1 | 368 |
| 87 454 9.44E-173597 100                       |        |     |    |   |   |     |
| Homo_sapiens_13:36316772-36321823_HERVHF 3LTR |        |     |    |   |   |     |
| Homo_sapiens_6:125702300-125707310_HERVHF3LTR | 95.924 | 368 | 12 | 1 | 1 | 368 |
| 87 451 3.3E-172 595 100                       |        |     |    |   |   |     |

|                                                |        |     |    |   |   |     |  |
|------------------------------------------------|--------|-----|----|---|---|-----|--|
| Homo_sapiens_13:36316772-36321823_HERVHF 5LTR  |        |     |    |   |   |     |  |
| Homo_sapiens_6:125702300-125707310_HERVHF5LTR  | 95.43  | 372 | 12 | 2 | 1 | 367 |  |
| 83 454 4.01E-171590 99                         |        |     |    |   |   |     |  |
| Homo_sapiens_13:36316772-36321823_HERVHF 5LTR  |        |     |    |   |   |     |  |
| Homo_sapiens_8:97201222-97206202_HERVHF 3LTR   | 94.638 | 373 | 15 | 2 | 1 | 368 |  |
| 84 456 2.53E-167579 100                        |        |     |    |   |   |     |  |
| Homo_sapiens_13:36316772-36321823_HERVHF 3LTR  |        |     |    |   |   |     |  |
| Homo_sapiens_8:97201222-97206202_HERVHF 5LTR   | 95.652 | 368 | 16 | 0 | 1 | 368 |  |
| 84 451 1.15E-171592 100                        |        |     |    |   |   |     |  |
| Homo_sapiens_13:36316772-36321823_HERVHF 5LTR  |        |     |    |   |   |     |  |
| Homo_sapiens_9:99670236-99675451_HERVHF 3LTR   | 94.37  | 373 | 16 | 2 | 1 | 368 |  |
| 80 452 3.09E-166574 100                        |        |     |    |   |   |     |  |
| Homo_sapiens_13:36316772-36321823_HERVHF 3LTR  |        |     |    |   |   |     |  |
| Homo_sapiens_9:99670236-99675451_HERVHF 5LTR   | 95.924 | 368 | 15 | 0 | 1 | 368 |  |
| 83 450 9.44E-173597 100                        |        |     |    |   |   |     |  |
| Homo_sapiens_13:36316772-36321823_HERVHF 5LTR  |        |     |    |   |   |     |  |
| Homo_sapiens_X:87682131-87687194_HERVHF 3LTR   | 94.638 | 373 | 15 | 2 | 1 | 368 |  |
| 80 452 2.53E-167579 100                        |        |     |    |   |   |     |  |
| Homo_sapiens_13:36316772-36321823_HERVHF 3LTR  |        |     |    |   |   |     |  |
| Homo_sapiens_X:87682131-87687194_HERVHF 5LTR   | 95.924 | 368 | 15 | 0 | 1 | 368 |  |
| 82 449 9.44E-173597 100                        |        |     |    |   |   |     |  |
| Homo_sapiens_13:36316772-36321823_HERVHF 5LTR  |        |     |    |   |   |     |  |
| Homo_sapiens_X:92824882-92828895_HERVHF 3LTR   | 94.906 | 373 | 14 | 2 | 1 | 368 |  |
| 80 452 5.96E-169583 100                        |        |     |    |   |   |     |  |
| Homo_sapiens_13:36316772-36321823_HERVHF 3LTR  |        |     |    |   |   |     |  |
| Homo_sapiens_X:92824882-92828895_HERVHF 5LTR   | 96.486 | 370 | 11 | 1 | 1 | 368 |  |
| 83 452 5.22E-176607 100                        |        |     |    |   |   |     |  |
| Homo_sapiens_13:86358624-86363686_HERVHF 3LTR  |        |     |    |   |   |     |  |
| Homo_sapiens_16:60078989-60084128_HERVHF 3LTR  | 96.018 | 452 | 18 | 0 | 1 | 452 |  |
| 1 452 0 735 99                                 |        |     |    |   |   |     |  |
| Homo_sapiens_13:86358624-86363686_HERVHF 5LTR  |        |     |    |   |   |     |  |
| Homo_sapiens_16:60078989-60084128_HERVHF 5LTR  | 95.585 | 453 | 19 | 1 | 3 | 454 |  |
| 1 453 0 724 99                                 |        |     |    |   |   |     |  |
| Homo_sapiens_13:86358624-86363686_HERVHF 3LTR  |        |     |    |   |   |     |  |
| Homo_sapiens_2:215922762-215927674_HERVHF3LTR  | 96.476 | 454 | 14 | 1 | 1 | 452 |  |
| 1 454 0 745 99                                 |        |     |    |   |   |     |  |
| Homo_sapiens_13:86358624-86363686_HERVHF 5LTR  |        |     |    |   |   |     |  |
| Homo_sapiens_2:215922762-215927674_HERVHF5LTR  | 95.604 | 455 | 17 | 2 | 2 | 453 |  |
| 1 455 0 725 99                                 |        |     |    |   |   |     |  |
| Homo_sapiens_13:86358624-86363686_HERVHF 3LTR  |        |     |    |   |   |     |  |
| Homo_sapiens_3:112418865-112422911_HERVHF 3LTR | 96.026 | 453 | 17 | 1 | 1 | 452 |  |
| 3 455 0 733 99                                 |        |     |    |   |   |     |  |
| Homo_sapiens_13:86358624-86363686_HERVHF 5LTR  |        |     |    |   |   |     |  |
| Homo_sapiens_3:112418865-112422911_HERVHF 5LTR | 95.575 | 452 | 19 | 1 | 1 | 451 |  |

|                                               |                                               |        |     |     |   |   |     |  |  |
|-----------------------------------------------|-----------------------------------------------|--------|-----|-----|---|---|-----|--|--|
| 4                                             | 455                                           | 0      | 722 | 99  |   |   |     |  |  |
| Homo_sapiens_13:86358624-86363686_HERVHF 5LTR |                                               |        |     |     |   |   |     |  |  |
|                                               | Homo_sapiens_3:115793932-115798715_HERVHF3LTR | 95.344 | 451 | 21  | 0 | 1 | 451 |  |  |
| 1                                             | 451                                           | 0      | 719 | 99  |   |   |     |  |  |
| Homo_sapiens_13:86358624-86363686_HERVHF 3LTR |                                               |        |     |     |   |   |     |  |  |
|                                               | Homo_sapiens_3:115793932-115798715_HERVHF5LTR | 96.231 | 451 | 16  | 1 | 1 | 451 |  |  |
| 2                                             | 451                                           | 0      | 734 | 99  |   |   |     |  |  |
| Homo_sapiens_13:86358624-86363686_HERVHF 3LTR |                                               |        |     |     |   |   |     |  |  |
|                                               | Homo_sapiens_9:121790452-121796319_HERVHF3LTR | 96.018 | 452 | 17  | 1 | 1 | 452 |  |  |
| 2                                             | 452                                           | 0      | 731 | 99  |   |   |     |  |  |
| Homo_sapiens_13:86358624-86363686_HERVHF 5LTR |                                               |        |     |     |   |   |     |  |  |
|                                               | Homo_sapiens_9:121790452-121796319_HERVHF5LTR | 95.806 | 453 | 16  | 3 | 1 | 452 |  |  |
| 1                                             | 451                                           | 0      | 721 | 99  |   |   |     |  |  |
| Homo_sapiens_13:86358624-86363686_HERVHF 3LTR |                                               |        |     |     |   |   |     |  |  |
|                                               | Homo_sapiens_9:99670236-99675451_HERVHF 3LTR  | 96.026 | 453 | 18  | 0 | 1 | 453 |  |  |
| 1                                             | 453                                           | 0      | 737 | 99  |   |   |     |  |  |
| Homo_sapiens_13:86358624-86363686_HERVHF 5LTR |                                               |        |     |     |   |   |     |  |  |
|                                               | Homo_sapiens_9:99670236-99675451_HERVHF 5LTR  | 95.385 | 455 | 20  | 1 | 2 | 455 |  |  |
| 1                                             | 455                                           | 0      | 723 | 99  |   |   |     |  |  |
| Homo_sapiens_13:86358624-86363686_HERVHF 3LTR |                                               |        |     |     |   |   |     |  |  |
|                                               | Homo_sapiens_X:98524704-98529618_HERVHF 3LTR  | 95.565 | 451 | 20  | 0 | 1 | 451 |  |  |
| 10                                            | 460                                           | 0      | 724 | 99  |   |   |     |  |  |
| Homo_sapiens_13:86358624-86363686_HERVHF 5LTR |                                               |        |     |     |   |   |     |  |  |
|                                               | Homo_sapiens_X:98524704-98529618_HERVHF 5LTR  | 95.595 | 454 | 18  | 2 | 1 | 452 |  |  |
| 8                                             | 461                                           | 0      | 722 | 99  |   |   |     |  |  |
| Homo_sapiens_15:87831557-87836573_HERVHF 3LTR |                                               |        |     |     |   |   |     |  |  |
|                                               | Homo_sapiens_16:60078989-60084128_HERVHF 3LTR | 94.26  | 453 | 23  | 3 | 1 | 451 |  |  |
| 1                                             | 452                                           | 0      | 690 | 100 |   |   |     |  |  |
| Homo_sapiens_15:87831557-87836573_HERVHF 5LTR |                                               |        |     |     |   |   |     |  |  |
|                                               | Homo_sapiens_16:60078989-60084128_HERVHF 5LTR | 96.231 | 451 | 15  | 1 | 2 | 450 |  |  |
| 1                                             | 451                                           | 0      | 735 | 99  |   |   |     |  |  |
| Homo_sapiens_15:87831557-87836573_HERVHF 3LTR |                                               |        |     |     |   |   |     |  |  |
|                                               | Homo_sapiens_19:53831857-53836889_HERVHF 3LTR | 94.04  | 453 | 24  | 3 | 1 | 451 |  |  |
| 10                                            | 461                                           | 0      | 685 | 100 |   |   |     |  |  |
| Homo_sapiens_15:87831557-87836573_HERVHF 5LTR |                                               |        |     |     |   |   |     |  |  |
|                                               | Homo_sapiens_19:53831857-53836889_HERVHF 5LTR | 95.354 | 452 | 19  | 1 | 1 | 450 |  |  |
| 1                                             | 452                                           | 0      | 719 | 100 |   |   |     |  |  |
| Homo_sapiens_15:87831557-87836573_HERVHF 3LTR |                                               |        |     |     |   |   |     |  |  |
|                                               | Homo_sapiens_2:215922762-215927674_HERVHF3LTR | 94.505 | 455 | 20  | 4 | 1 | 451 |  |  |
| 1                                             | 454                                           | 0      | 695 | 100 |   |   |     |  |  |
| Homo_sapiens_15:87831557-87836573_HERVHF 5LTR |                                               |        |     |     |   |   |     |  |  |
|                                               | Homo_sapiens_2:215922762-215927674_HERVHF5LTR | 95.595 | 454 | 16  | 2 | 1 | 450 |  |  |
| 1                                             | 454                                           | 0      | 724 | 100 |   |   |     |  |  |
| Homo_sapiens_15:87831557-87836573_HERVHF 3LTR |                                               |        |     |     |   |   |     |  |  |

|                                           |      |        |     |    |   |   |       |
|-------------------------------------------|------|--------|-----|----|---|---|-------|
| Homo_sapiens_2:5001218-5006279_HERVHF     | 3LTR | 94.027 | 452 | 25 | 2 | 1 | 451   |
| 3 453 0 687 100                           |      |        |     |    |   |   |       |
| Homo_sapiens_15:87831557-87836573_HERVHF  | 5LTR |        |     |    |   |   |       |
| Homo_sapiens_2:5001218-5006279_HERVHF     | 5LTR | 94.248 | 452 | 21 | 2 | 1 | 450   |
| 2 450 0 694 100                           |      |        |     |    |   |   |       |
| Homo_sapiens_15:87831557-87836573_HERVHF  | 5LTR |        |     |    |   |   |       |
| Homo_sapiens_2:76574075-76579252_HERVHF   | 3LTR | 94.235 | 451 | 24 | 1 | 1 | 449   |
| 2 452 0 694 99                            |      |        |     |    |   |   |       |
| Homo_sapiens_15:87831557-87836573_HERVHF  | 3LTR |        |     |    |   |   |       |
| Homo_sapiens_2:76574075-76579252_HERVHF   | 5LTR | 94.027 | 452 | 24 | 3 | 1 | 450   |
| 2 452 0 683 99                            |      |        |     |    |   |   |       |
| Homo_sapiens_15:87831557-87836573_HERVHF  | 3LTR |        |     |    |   |   |       |
| Homo_sapiens_20:12754276-12759162_HERVHF  | 3LTR | 94.702 | 453 | 17 | 4 | 1 | 447   |
| 19 470 0 698 99                           |      |        |     |    |   |   |       |
| Homo_sapiens_15:87831557-87836573_HERVHF  | 5LTR |        |     |    |   |   |       |
| Homo_sapiens_20:12754276-12759162_HERVHF  | 5LTR | 94.737 | 456 | 18 | 2 | 1 | 450   |
| 19 474 0 711 100                          |      |        |     |    |   |   |       |
| Homo_sapiens_15:87831557-87836573_HERVHF  | 3LTR |        |     |    |   |   |       |
| Homo_sapiens_3:112418865-112422911_HERVHF | 3LTR | 95.364 | 453 | 19 | 2 | 1 | 451   |
| 3 455 0 716 100                           |      |        |     |    |   |   |       |
| Homo_sapiens_15:87831557-87836573_HERVHF  | 5LTR |        |     |    |   |   |       |
| Homo_sapiens_3:112418865-112422911_HERVHF | 5LTR | 96.231 | 451 | 15 | 1 | 1 | 449   |
| 5 455 0 735 99                            |      |        |     |    |   |   |       |
| Homo_sapiens_15:87831557-87836573_HERVHF  | 5LTR |        |     |    |   |   |       |
| Homo_sapiens_3:115793932-115798715_HERVHF | 3LTR | 94.678 | 451 | 21 | 2 | 1 | 449   |
| 2 451 0 700 99                            |      |        |     |    |   |   |       |
| Homo_sapiens_15:87831557-87836573_HERVHF  | 3LTR |        |     |    |   |   |       |
| Homo_sapiens_3:115793932-115798715_HERVHF | 5LTR | 94.9   | 451 | 21 | 2 | 1 | 450 2 |
| 451 0 703 99                              |      |        |     |    |   |   |       |
| Homo_sapiens_15:87831557-87836573_HERVHF  | 3LTR |        |     |    |   |   |       |
| Homo_sapiens_3:191666713-191671926_HERVHF | 3LTR | 94.69  | 452 | 21 | 3 | 1 | 450   |
| 3 453 0 697 99                            |      |        |     |    |   |   |       |
| Homo_sapiens_15:87831557-87836573_HERVHF  | 5LTR |        |     |    |   |   |       |
| Homo_sapiens_3:191666713-191671926_HERVHF | 5LTR | 94.678 | 451 | 21 | 2 | 1 | 449   |
| 6 455 0 700 99                            |      |        |     |    |   |   |       |
| Homo_sapiens_15:87831557-87836573_HERVHF  | 5LTR |        |     |    |   |   |       |
| Homo_sapiens_4:125562071-125567006_HERVHF | 3LTR | 95.078 | 447 | 18 | 2 | 5 | 449   |
| 7 451 0 702 99                            |      |        |     |    |   |   |       |
| Homo_sapiens_15:87831557-87836573_HERVHF  | 3LTR |        |     |    |   |   |       |
| Homo_sapiens_4:125562071-125567006_HERVHF | 5LTR | 94.469 | 452 | 22 | 3 | 1 | 450   |
| 3 453 0 692 99                            |      |        |     |    |   |   |       |
| Homo_sapiens_15:87831557-87836573_HERVHF  | 5LTR |        |     |    |   |   |       |
| Homo_sapiens_4:78714293-78719270_HERVHF   | 3LTR | 94.9   | 451 | 20 | 2 | 1 | 449 2 |
| 451 0 704 99                              |      |        |     |    |   |   |       |

|                                               |      |              |     |     |   |   |     |  |  |
|-----------------------------------------------|------|--------------|-----|-----|---|---|-----|--|--|
| Homo_sapiens_15:87831557-87836573_HERVHF 3LTR |      |              |     |     |   |   |     |  |  |
| Homo_sapiens_4:78714293-78719270_HERVHF       | 5LTR | 94.912       | 452 | 21  | 2 | 1 | 450 |  |  |
| 2                                             | 453  | 0            | 705 | 99  |   |   |     |  |  |
| Homo_sapiens_15:87831557-87836573_HERVHF 5LTR |      |              |     |     |   |   |     |  |  |
| Homo_sapiens_6:115032245-115037164_HERVHF     | 3LTR | 95.133       | 452 | 19  | 2 | 1 | 450 |  |  |
| 7                                             | 457  | 0            | 710 | 100 |   |   |     |  |  |
| Homo_sapiens_15:87831557-87836573_HERVHF 3LTR |      |              |     |     |   |   |     |  |  |
| Homo_sapiens_6:115032245-115037164_HERVHF     | 5LTR | 94.26        | 453 | 23  | 3 | 1 | 451 |  |  |
| 7                                             | 458  | 0            | 690 | 100 |   |   |     |  |  |
| Homo_sapiens_15:87831557-87836573_HERVHF 3LTR |      |              |     |     |   |   |     |  |  |
| Homo_sapiens_9:121790452-121796319_HERVHF     | 3LTR | 94.26        | 453 | 22  | 3 | 1 | 451 |  |  |
| 2                                             | 452  | 0            | 691 | 100 |   |   |     |  |  |
| Homo_sapiens_15:87831557-87836573_HERVHF 5LTR |      |              |     |     |   |   |     |  |  |
| Homo_sapiens_9:121790452-121796319_HERVHF     | 5LTR | 95.796       | 452 | 15  | 3 | 1 | 450 |  |  |
| 2                                             | 451  | 0            | 720 | 100 |   |   |     |  |  |
| Homo_sapiens_15:87831557-87836573_HERVHF 5LTR |      |              |     |     |   |   |     |  |  |
| Homo_sapiens_9:99670236-99675451_HERVHF       | 3LTR | 95.796       | 452 | 17  | 1 | 1 | 450 |  |  |
| 1                                             | 452  | 0            | 728 | 100 |   |   |     |  |  |
| Homo_sapiens_15:87831557-87836573_HERVHF 3LTR |      |              |     |     |   |   |     |  |  |
| Homo_sapiens_9:99670236-99675451_HERVHF       | 5LTR | 94.923       | 453 | 20  | 3 | 1 | 451 |  |  |
| 1                                             | 452  | 0            | 703 | 100 |   |   |     |  |  |
| Homo_sapiens_15:87831557-87836573_HERVHF 3LTR |      |              |     |     |   |   |     |  |  |
| Homo_sapiens_X:87682131-87687194_HERVHF       | 3LTR | 94.481       | 453 | 22  | 3 | 1 | 451 |  |  |
| 1                                             | 452  | 0            | 694 | 100 |   |   |     |  |  |
| Homo_sapiens_15:87831557-87836573_HERVHF 5LTR |      |              |     |     |   |   |     |  |  |
| Homo_sapiens_X:87682131-87687194_HERVHF       | 5LTR | 94.69        | 452 | 21  | 2 | 1 | 450 |  |  |
| 1                                             | 451  | 0            | 701 | 100 |   |   |     |  |  |
| Homo_sapiens_15:87831557-87836573_HERVHF 3LTR |      |              |     |     |   |   |     |  |  |
| Homo_sapiens_X:92824882-92828895_HERVHF       | 3LTR | 94.481       | 453 | 22  | 3 | 1 | 451 |  |  |
| 1                                             | 452  | 0            | 694 | 100 |   |   |     |  |  |
| Homo_sapiens_15:87831557-87836573_HERVHF 5LTR |      |              |     |     |   |   |     |  |  |
| Homo_sapiens_X:92824882-92828895_HERVHF       | 5LTR | 95.815       | 454 | 15  | 2 | 1 | 450 |  |  |
| 1                                             | 454  | 0            | 728 | 100 |   |   |     |  |  |
| Homo_sapiens_19:54894715-54900183_HERVHF 3LTR |      |              |     |     |   |   |     |  |  |
| Homo_sapiens_3:72023534-72028493_HERVHF       | 3LTR | 94.074       | 405 | 23  | 1 | 2 | 406 |  |  |
| 2                                             | 405  | 9.34E-180619 | 98  |     |   |   |     |  |  |
| Homo_sapiens_19:54894715-54900183_HERVHF 5LTR |      |              |     |     |   |   |     |  |  |
| Homo_sapiens_3:72023534-72028493_HERVHF       | 5LTR | 93.237       | 414 | 22  | 3 | 7 | 420 |  |  |
| 2                                             | 409  | 1.4E-177     | 613 | 99  |   |   |     |  |  |
| Homo_sapiens_19:54894715-54900183_HERVHF 5LTR |      |              |     |     |   |   |     |  |  |
| Homo_sapiens_4:178207533-178212931_HERVHF     | 3LTR | 94.458       | 415 | 19  | 4 | 7 | 420 |  |  |
| 1                                             | 412  | 0            | 631 | 99  |   |   |     |  |  |
| Homo_sapiens_19:54894715-54900183_HERVHF 3LTR |      |              |     |     |   |   |     |  |  |
| Homo_sapiens_4:178207533-178212931_HERVHF     | 5LTR | 92.995       | 414 | 28  | 1 | 2 | 415 |  |  |

1 413 1.39E-177613 99  
Homo\_sapiens\_2:5001218-5006279\_HERVHF 3LTR  
Homo\_sapiens\_6:125702300-125707310\_HERVHF3LTR 95.604 455 14 3 2 453  
2 453 0 723 99  
Homo\_sapiens\_2:5001218-5006279\_HERVHF 5LTR  
Homo\_sapiens\_6:125702300-125707310\_HERVHF5LTR 95.796 452 16 1 1 449  
3 454 0 728 99  
Homo\_sapiens\_2:58113791-58118698\_HERVHF 3LTR  
Homo\_sapiens\_5:100984733-100989791\_HERVHF3LTR 94.693 358 18 1 1 357  
92 449 8.02E-161557 100  
Homo\_sapiens\_2:58113791-58118698\_HERVHF 5LTR  
Homo\_sapiens\_5:100984733-100989791\_HERVHF5LTR 95.543 359 12 2 2 356  
82 440 3.64E-165571 99  
Homo\_sapiens\_2:58113791-58118698\_HERVHF 3LTR  
Homo\_sapiens\_6:124890844-124897330\_HERVHF3LTR 96.648 358 11 1 1 357  
75 432 1.36E-170589 100  
Homo\_sapiens\_2:58113791-58118698\_HERVHF 5LTR  
Homo\_sapiens\_6:124890844-124897330\_HERVHF5LTR 94.722 360 15 2 2 357  
71 430 2.3E-161 559 99  
Homo\_sapiens\_2:58113791-58118698\_HERVHF 5LTR  
Homo\_sapiens\_6:144923609-144928414\_HERVHF3LTR 94.167 360 17 2 2 357  
82 441 1.19E-158550 99  
Homo\_sapiens\_2:58113791-58118698\_HERVHF 3LTR  
Homo\_sapiens\_6:144923609-144928414\_HERVHF5LTR 94.693 358 18 1 1 357  
86 443 8.02E-161557 100  
Homo\_sapiens\_2:58113791-58118698\_HERVHF 3LTR  
Homo\_sapiens\_8:99944145-99949257\_HERVHF 3LTR 95.726 351 13 2 9 357  
1 351 2.3E-161 559 98  
Homo\_sapiens\_2:58113791-58118698\_HERVHF 5LTR  
Homo\_sapiens\_8:99944145-99949257\_HERVHF 5LTR 95.977 348 13 1 11 357  
1 348 1.89E-162562 97  
Homo\_sapiens\_2:71086810-71090545\_HERVHF 3LTR  
Homo\_sapiens\_3:112418865-112422911\_HERVHF 3LTR 96.026 453 17 1 2 453  
2 454 0 733 99  
Homo\_sapiens\_2:71086810-71090545\_HERVHF 5LTR  
Homo\_sapiens\_3:112418865-112422911\_HERVHF 5LTR 95.374 454 19 1 1 452  
2 455 0 722 100  
Homo\_sapiens\_2:71086810-71090545\_HERVHF 3LTR  
Homo\_sapiens\_X:87682131-87687194\_HERVHF 3LTR 96.437 449 16 0 5 453  
3 451 0 738 99  
Homo\_sapiens\_2:71086810-71090545\_HERVHF 5LTR  
Homo\_sapiens\_X:87682131-87687194\_HERVHF 5LTR 95.565 451 17 2 4 452  
1 450 0 718 99  
Homo\_sapiens\_2:71086810-71090545\_HERVHF 3LTR



|                                                |        |     |    |   |   |     |
|------------------------------------------------|--------|-----|----|---|---|-----|
| Homo_sapiens_X:92824882-92828895_HERVHF 3LTR   | 95.991 | 449 | 18 | 0 | 5 | 453 |
| 3 451 0 729 99                                 |        |     |    |   |   |     |
| Homo_sapiens_2:71086810-71090545_HERVHF 5LTR   |        |     |    |   |   |     |
| Homo_sapiens_X:92824882-92828895_HERVHF 5LTR   | 95.585 | 453 | 16 | 2 | 4 | 452 |
| 1 453 0 722 99                                 |        |     |    |   |   |     |
| Homo_sapiens_2:77088587-77093690_HERVHF 3LTR   |        |     |    |   |   |     |
| Homo_sapiens_3:112418865-112422911_HERVHF 3LTR | 96.481 | 341 | 9  | 2 | 1 | 338 |
| 26 366 2.75E-160555 96                         |        |     |    |   |   |     |
| Homo_sapiens_2:77088587-77093690_HERVHF 5LTR   |        |     |    |   |   |     |
| Homo_sapiens_3:112418865-112422911_HERVHF 5LTR | 95.87  | 339 | 14 | 0 | 1 | 339 |
| 29 367 1.13E-158549 100                        |        |     |    |   |   |     |
| Homo_sapiens_2:77088587-77093690_HERVHF 3LTR   |        |     |    |   |   |     |
| Homo_sapiens_4:125562071-125567006_HERVHF 3LTR | 96.471 | 340 | 10 | 1 | 1 | 338 |
| 26 365 7.88E-161557 96                         |        |     |    |   |   |     |
| Homo_sapiens_2:77088587-77093690_HERVHF 5LTR   |        |     |    |   |   |     |
| Homo_sapiens_4:125562071-125567006_HERVHF 5LTR | 95.87  | 339 | 14 | 0 | 1 | 339 |
| 27 365 1.13E-158549 100                        |        |     |    |   |   |     |
| Homo_sapiens_2:77088587-77093690_HERVHF 3LTR   |        |     |    |   |   |     |
| Homo_sapiens_6:125702300-125707310_HERVHF 3LTR | 95.614 | 342 | 8  | 3 | 1 | 338 |
| 26 364 1.74E-156543 96                         |        |     |    |   |   |     |
| Homo_sapiens_2:77088587-77093690_HERVHF 5LTR   |        |     |    |   |   |     |
| Homo_sapiens_6:125702300-125707310_HERVHF 5LTR | 96.46  | 339 | 12 | 0 | 1 | 339 |
| 28 366 2.18E-161558 100                        |        |     |    |   |   |     |
| Homo_sapiens_2:77088587-77093690_HERVHF 5LTR   |        |     |    |   |   |     |
| Homo_sapiens_6:90670654-90675059_HERVHF 3LTR   | 95.575 | 339 | 15 | 0 | 1 | 339 |
| 33 371 4.79E-157545 100                        |        |     |    |   |   |     |
| Homo_sapiens_2:77088587-77093690_HERVHF 3LTR   |        |     |    |   |   |     |
| Homo_sapiens_6:90670654-90675059_HERVHF 5LTR   | 95.882 | 340 | 12 | 1 | 1 | 338 |
| 28 367 4.08E-158548 96                         |        |     |    |   |   |     |
| Homo_sapiens_2:77088587-77093690_HERVHF 5LTR   |        |     |    |   |   |     |
| Homo_sapiens_X:87682131-87687194_HERVHF 3LTR   | 96.755 | 339 | 11 | 0 | 1 | 339 |
| 25 363 1.79E-162563 100                        |        |     |    |   |   |     |
| Homo_sapiens_2:77088587-77093690_HERVHF 3LTR   |        |     |    |   |   |     |
| Homo_sapiens_X:87682131-87687194_HERVHF 5LTR   | 95.882 | 340 | 11 | 2 | 1 | 338 |
| 24 362 4.97E-157545 96                         |        |     |    |   |   |     |
| Homo_sapiens_2:77088587-77093690_HERVHF 3LTR   |        |     |    |   |   |     |
| Homo_sapiens_X:98524704-98529618_HERVHF 3LTR   | 95.588 | 340 | 13 | 1 | 1 | 338 |
| 33 372 4.97E-157544 96                         |        |     |    |   |   |     |
| Homo_sapiens_2:77088587-77093690_HERVHF 5LTR   |        |     |    |   |   |     |
| Homo_sapiens_X:98524704-98529618_HERVHF 5LTR   | 95.882 | 340 | 13 | 1 | 1 | 339 |
| 33 372 3.93E-158547 100                        |        |     |    |   |   |     |
| Homo_sapiens_3:166501004-166506099_HERVHF 5LTR |        |     |    |   |   |     |
| Homo_sapiens_4:130767812-130772870_HERVHF 3LTR | 94.062 | 320 | 16 | 2 | 3 | 322 |
| 1 317 1.07E-139486 99                          |        |     |    |   |   |     |

|                                                |        |     |    |   |   |     |   |
|------------------------------------------------|--------|-----|----|---|---|-----|---|
| Homo_sapiens_3:166501004-166506099_HERVHF3LTR  |        |     |    |   |   |     |   |
| Homo_sapiens_4:130767812-130772870_HERVHF5LTR  | 93.769 | 321 | 17 | 2 | 3 | 320 |   |
| 1 321 1.29E-138483 99                          |        |     |    |   |   |     |   |
| Homo_sapiens_3:166501004-166506099_HERVHF5LTR  |        |     |    |   |   |     |   |
| Homo_sapiens_7:31467260-31471973_HERVHF 3LTR   | 93.789 | 322 | 19 | 1 | 2 | 322 |   |
| 5 326 3.06E-140488 99                          |        |     |    |   |   |     |   |
| Homo_sapiens_3:166501004-166506099_HERVHF3LTR  |        |     |    |   |   |     |   |
| Homo_sapiens_7:31467260-31471973_HERVHF 5LTR   | 93.769 | 321 | 18 | 1 | 2 | 320 |   |
| 1 321 1.06E-139487 99                          |        |     |    |   |   |     |   |
| Homo_sapiens_3:190920619-190925408_HERVHF5LTR  |        |     |    |   |   |     |   |
| Homo_sapiens_X:87682131-87687194_HERVHF 3LTR   | 94.912 | 452 | 19 | 2 | 1 | 448 |   |
| 1 452 0 707 98                                 |        |     |    |   |   |     |   |
| Homo_sapiens_3:190920619-190925408_HERVHF3LTR  |        |     |    |   |   |     |   |
| Homo_sapiens_X:87682131-87687194_HERVHF 5LTR   | 95.354 | 452 | 19 | 2 | 4 | 454 |   |
| 1 451 0 714 99                                 |        |     |    |   |   |     |   |
| Homo_sapiens_3:191666713-191671926_HERVHF5LTR  |        |     |    |   |   |     |   |
| Homo_sapiens_6:115032245-115037164_HERVHF 3LTR | 94.945 | 455 | 23 | 0 | 1 | 455 |   |
| 2 456 0 718 100                                |        |     |    |   |   |     |   |
| Homo_sapiens_3:191666713-191671926_HERVHF3LTR  |        |     |    |   |   |     |   |
| Homo_sapiens_6:115032245-115037164_HERVHF 5LTR | 95.575 | 452 | 20 | 0 | 2 | 453 |   |
| 6 457 0 726 99                                 |        |     |    |   |   |     |   |
| Homo_sapiens_3:191666713-191671926_HERVHF5LTR  |        |     |    |   |   |     |   |
| Homo_sapiens_6:125702300-125707310_HERVHF3LTR  | 94.934 | 454 | 17 | 3 | 5 | 455 |   |
| 2 452 0 708 99                                 |        |     |    |   |   |     |   |
| Homo_sapiens_3:191666713-191671926_HERVHF3LTR  |        |     |    |   |   |     |   |
| Homo_sapiens_6:125702300-125707310_HERVHF 5LTR | 95.133 | 452 | 22 | 0 | 2 | 453 |   |
| 3 454 0 717 99                                 |        |     |    |   |   |     |   |
| Homo_sapiens_3:191666713-191671926_HERVHF5LTR  |        |     |    |   |   |     |   |
| Homo_sapiens_9:121790452-121796319_HERVHF3LTR  | 95.575 | 452 | 18 | 2 | 5 | 455 |   |
| 1 451 0 719 99                                 |        |     |    |   |   |     |   |
| Homo_sapiens_3:191666713-191671926_HERVHF3LTR  |        |     |    |   |   |     |   |
| Homo_sapiens_9:121790452-121796319_HERVHF 5LTR | 94.912 | 452 | 21 | 2 | 2 | 453 |   |
| 1 450 0 705 99                                 |        |     |    |   |   |     |   |
| Homo_sapiens_3:191666713-191671926_HERVHF3LTR  |        |     |    |   |   |     |   |
| Homo_sapiens_9:99670236-99675451_HERVHF 3LTR   | 94.9   | 451 | 23 | 0 | 3 | 453 | 1 |
| 451 0 710 99                                   |        |     |    |   |   |     |   |
| Homo_sapiens_3:191666713-191671926_HERVHF5LTR  |        |     |    |   |   |     |   |
| Homo_sapiens_9:99670236-99675451_HERVHF 5LTR   | 95.787 | 451 | 18 | 1 | 6 | 455 |   |
| 1 451 0 725 99                                 |        |     |    |   |   |     |   |
| Homo_sapiens_3:191666713-191671926_HERVHF5LTR  |        |     |    |   |   |     |   |
| Homo_sapiens_X:92824882-92828895_HERVHF 3LTR   | 95.344 | 451 | 20 | 1 | 6 | 455 |   |
| 1 451 0 716 99                                 |        |     |    |   |   |     |   |
| Homo_sapiens_3:191666713-191671926_HERVHF3LTR  |        |     |    |   |   |     |   |
| Homo_sapiens_X:92824882-92828895_HERVHF 5LTR   | 94.923 | 453 | 21 | 1 | 3 | 453 |   |

|                                               |                                           |              |        |     |    |   |   |     |    |  |
|-----------------------------------------------|-------------------------------------------|--------------|--------|-----|----|---|---|-----|----|--|
| 1                                             | 453                                       | 0            | 711    | 99  |    |   |   |     |    |  |
| Homo_sapiens_3:191666713-191671926_HERVHF3LTR |                                           |              |        |     |    |   |   |     |    |  |
|                                               | Homo_sapiens_X:98524704-98529618_HERVHF   | 3LTR         | 94.69  | 452 | 24 | 0 | 2 | 453 |    |  |
| 9                                             | 460                                       | 0            | 708    | 99  |    |   |   |     |    |  |
| Homo_sapiens_3:191666713-191671926_HERVHF5LTR |                                           |              |        |     |    |   |   |     |    |  |
|                                               | Homo_sapiens_X:98524704-98529618_HERVHF   | 5LTR         | 94.748 | 457 | 22 | 2 | 1 | 455 |    |  |
| 4                                             | 460                                       | 0            | 710    | 100 |    |   |   |     |    |  |
| Homo_sapiens_3:21189353-21193803_HERVHF 5LTR  |                                           |              |        |     |    |   |   |     |    |  |
|                                               | Homo_sapiens_7:31467260-31471973_HERVHF   | 3LTR         | 93.168 | 322 | 21 | 1 | 1 | 322 |    |  |
| 75                                            | 395                                       | 1.59E-137479 | 100    |     |    |   |   |     |    |  |
| Homo_sapiens_3:21189353-21193803_HERVHF 3LTR  |                                           |              |        |     |    |   |   |     |    |  |
|                                               | Homo_sapiens_7:31467260-31471973_HERVHF   | 5LTR         | 93.333 | 330 | 20 | 2 | 1 | 329 |    |  |
| 67                                            | 395                                       | 9.18E-141489 | 98     |     |    |   |   |     |    |  |
| Homo_sapiens_4:16998200-17003527_HERVHF 5LTR  |                                           |              |        |     |    |   |   |     |    |  |
|                                               | Homo_sapiens_6:115032245-115037164_HERVHF | 3LTR         | 96.429 | 392 | 12 | 2 | 1 | 392 |    |  |
| 68                                            | 457                                       | 0            | 637    | 100 |    |   |   |     |    |  |
| Homo_sapiens_4:16998200-17003527_HERVHF 3LTR  |                                           |              |        |     |    |   |   |     |    |  |
|                                               | Homo_sapiens_6:115032245-115037164_HERVHF | 5LTR         | 95.949 | 395 | 16 | 0 | 6 | 400 |    |  |
| 64                                            | 458                                       | 0            | 641    | 99  |    |   |   |     |    |  |
| Homo_sapiens_4:16998200-17003527_HERVHF 3LTR  |                                           |              |        |     |    |   |   |     |    |  |
|                                               | Homo_sapiens_6:125702300-125707310_HERVHF | 3LTR         | 96     | 400 | 13 | 1 | 1 | 400 | 57 |  |
| 453                                           | 0                                         | 648          | 99     |     |    |   |   |     |    |  |
| Homo_sapiens_4:16998200-17003527_HERVHF 5LTR  |                                           |              |        |     |    |   |   |     |    |  |
|                                               | Homo_sapiens_6:125702300-125707310_HERVHF | 5LTR         | 96.931 | 391 | 11 | 1 | 1 | 391 |    |  |
| 65                                            | 454                                       | 0            | 648    | 99  |    |   |   |     |    |  |
| Homo_sapiens_4:16998200-17003527_HERVHF 3LTR  |                                           |              |        |     |    |   |   |     |    |  |
|                                               | Homo_sapiens_9:121790452-121796319_HERVHF | 3LTR         | 96.709 | 395 | 12 | 1 | 6 | 400 |    |  |
| 59                                            | 452                                       | 0            | 651    | 99  |    |   |   |     |    |  |
| Homo_sapiens_4:16998200-17003527_HERVHF 5LTR  |                                           |              |        |     |    |   |   |     |    |  |
|                                               | Homo_sapiens_9:121790452-121796319_HERVHF | 5LTR         | 96.429 | 392 | 11 | 2 | 1 | 392 |    |  |
| 63                                            | 451                                       | 0            | 638    | 100 |    |   |   |     |    |  |
| Homo_sapiens_4:16998200-17003527_HERVHF 3LTR  |                                           |              |        |     |    |   |   |     |    |  |
|                                               | Homo_sapiens_9:99670236-99675451_HERVHF   | 3LTR         | 95.707 | 396 | 17 | 0 | 6 | 401 |    |  |
| 58                                            | 453                                       | 0            | 638    | 99  |    |   |   |     |    |  |
| Homo_sapiens_4:16998200-17003527_HERVHF 5LTR  |                                           |              |        |     |    |   |   |     |    |  |
|                                               | Homo_sapiens_9:99670236-99675451_HERVHF   | 5LTR         | 96.429 | 392 | 13 | 1 | 1 | 392 |    |  |
| 62                                            | 452                                       | 0            | 641    | 100 |    |   |   |     |    |  |
| Homo_sapiens_4:175461498-175466677_HERVHF5LTR |                                           |              |        |     |    |   |   |     |    |  |
|                                               | Homo_sapiens_6:125702300-125707310_HERVHF | 3LTR         | 93.75  | 336 | 18 | 2 | 1 | 335 |    |  |
| 121                                           | 454                                       | 1.19E-145506 | 100    |     |    |   |   |     |    |  |
| Homo_sapiens_4:175461498-175466677_HERVHF3LTR |                                           |              |        |     |    |   |   |     |    |  |
|                                               | Homo_sapiens_6:125702300-125707310_HERVHF | 5LTR         | 95.062 | 324 | 14 | 2 | 1 | 322 |    |  |
| 131                                           | 454                                       | 1.16E-145506 | 99     |     |    |   |   |     |    |  |
| Homo_sapiens_4:24501427-24506300_HERVHF 5LTR  |                                           |              |        |     |    |   |   |     |    |  |

|                                               |        |     |    |   |    |     |
|-----------------------------------------------|--------|-----|----|---|----|-----|
| Homo_sapiens_6:125702300-125707310_HERVHF3LTR | 95.585 | 453 | 15 | 2 | 1  | 451 |
| 3 452 0 723 99                                |        |     |    |   |    |     |
| Homo_sapiens_4:24501427-24506300_HERVHF 3LTR  |        |     |    |   |    |     |
| Homo_sapiens_6:125702300-125707310_HERVHF5LTR | 95.787 | 451 | 19 | 0 | 1  | 451 |
| 4 454 0 728 99                                |        |     |    |   |    |     |
| Homo_sapiens_4:24501427-24506300_HERVHF 3LTR  |        |     |    |   |    |     |
| Homo_sapiens_9:99670236-99675451_HERVHF 3LTR  | 95.787 | 451 | 19 | 0 | 1  | 451 |
| 1 451 0 728 99                                |        |     |    |   |    |     |
| Homo_sapiens_4:24501427-24506300_HERVHF 5LTR  |        |     |    |   |    |     |
| Homo_sapiens_9:99670236-99675451_HERVHF 5LTR  | 95.565 | 451 | 20 | 0 | 1  | 451 |
| 1 451 0 724 99                                |        |     |    |   |    |     |
| Homo_sapiens_4:79554421-79559319_HERVHF 3LTR  |        |     |    |   |    |     |
| Homo_sapiens_6:115032245-115037164_HERVHF3LTR | 95.385 | 390 | 17 | 1 | 10 | 399 |
| 7 395 8.96E-180619 98                         |        |     |    |   |    |     |
| Homo_sapiens_4:79554421-79559319_HERVHF 5LTR  |        |     |    |   |    |     |
| Homo_sapiens_6:115032245-115037164_HERVHF5LTR | 95.19  | 395 | 19 | 0 | 3  | 397 |
| 3 397 0 627 99                                |        |     |    |   |    |     |
| Homo_sapiens_4:79554421-79559319_HERVHF 5LTR  |        |     |    |   |    |     |
| Homo_sapiens_6:125702300-125707310_HERVHF3LTR | 95.431 | 394 | 13 | 2 | 6  | 397 |
| 2 392 0 626 98                                |        |     |    |   |    |     |
| Homo_sapiens_4:79554421-79559319_HERVHF 3LTR  |        |     |    |   |    |     |
| Homo_sapiens_6:125702300-125707310_HERVHF5LTR | 95.641 | 390 | 17 | 0 | 10 | 399 |
| 4 393 0 627 98                                |        |     |    |   |    |     |
| Homo_sapiens_4:79554421-79559319_HERVHF 3LTR  |        |     |    |   |    |     |
| Homo_sapiens_6:93830563-93835343_HERVHF 3LTR  | 95.641 | 390 | 17 | 0 | 10 | 399 |
| 12 401 0 627 98                               |        |     |    |   |    |     |
| Homo_sapiens_4:79554421-79559319_HERVHF 5LTR  |        |     |    |   |    |     |
| Homo_sapiens_6:93830563-93835343_HERVHF 5LTR  | 95.939 | 394 | 15 | 1 | 4  | 397 |
| 1 393 0 636 99                                |        |     |    |   |    |     |
| Homo_sapiens_4:79554421-79559319_HERVHF 5LTR  |        |     |    |   |    |     |
| Homo_sapiens_9:99670236-99675451_HERVHF 3LTR  | 95.652 | 391 | 17 | 0 | 7  | 397 |
| 1 391 0 629 98                                |        |     |    |   |    |     |
| Homo_sapiens_4:79554421-79559319_HERVHF 3LTR  |        |     |    |   |    |     |
| Homo_sapiens_9:99670236-99675451_HERVHF 5LTR  | 95.641 | 390 | 17 | 0 | 10 | 399 |
| 1 390 0 627 98                                |        |     |    |   |    |     |
| Homo_sapiens_4:79554421-79559319_HERVHF 3LTR  |        |     |    |   |    |     |
| Homo_sapiens_X:87682131-87687194_HERVHF 3LTR  | 95.897 | 390 | 16 | 0 | 10 | 399 |
| 1 390 0 632 98                                |        |     |    |   |    |     |
| Homo_sapiens_4:79554421-79559319_HERVHF 5LTR  |        |     |    |   |    |     |
| Homo_sapiens_X:87682131-87687194_HERVHF 5LTR  | 96.419 | 391 | 13 | 1 | 7  | 397 |
| 1 390 0 639 98                                |        |     |    |   |    |     |
| Homo_sapiens_4:79554421-79559319_HERVHF 5LTR  |        |     |    |   |    |     |
| Homo_sapiens_X:98524704-98529618_HERVHF 3LTR  | 96.684 | 392 | 13 | 0 | 6  | 397 |
| 9 400 0 649 98                                |        |     |    |   |    |     |

|                                               |        |     |    |   |    |       |
|-----------------------------------------------|--------|-----|----|---|----|-------|
| Homo_sapiens_4:79554421-79559319_HERVHF 3LTR  |        |     |    |   |    |       |
| Homo_sapiens_X:98524704-98529618_HERVHF 5LTR  | 95.652 | 391 | 16 | 1 | 10 | 399   |
| 9 399 0 626 98                                |        |     |    |   |    |       |
| Homo_sapiens_5:100984733-100989791_HERVHF5LTR |        |     |    |   |    |       |
| Homo_sapiens_6:144923609-144928414_HERVHF3LTR | 96.136 | 440 | 17 | 0 | 1  | 440   |
| 1 440 0 718 100                               |        |     |    |   |    |       |
| Homo_sapiens_5:100984733-100989791_HERVHF3LTR |        |     |    |   |    |       |
| Homo_sapiens_6:144923609-144928414_HERVHF5LTR | 96.33  | 436 | 16 | 0 | 14 | 449   |
| 8 443 0 715 97                                |        |     |    |   |    |       |
| Homo_sapiens_5:136565792-136570795_HERVHF3LTR |        |     |    |   |    |       |
| Homo_sapiens_6:115032245-115037164_HERVHF3LTR | 93.377 | 453 | 25 | 4 | 4  | 453   |
| 6 456 0 669 99                                |        |     |    |   |    |       |
| Homo_sapiens_5:136565792-136570795_HERVHF5LTR |        |     |    |   |    |       |
| Homo_sapiens_6:115032245-115037164_HERVHF5LTR | 94.444 | 450 | 25 | 0 | 3  | 452   |
| 6 455 0 700 99                                |        |     |    |   |    |       |
| Homo_sapiens_5:136565792-136570795_HERVHF3LTR |        |     |    |   |    |       |
| Homo_sapiens_6:125702300-125707310_HERVHF3LTR | 94.298 | 456 | 17 | 5 | 3  | 453   |
| 1 452 0 691 99                                |        |     |    |   |    |       |
| Homo_sapiens_5:136565792-136570795_HERVHF5LTR |        |     |    |   |    |       |
| Homo_sapiens_6:125702300-125707310_HERVHF5LTR | 95.133 | 452 | 22 | 0 | 1  | 452   |
| 1 452 0 717 100                               |        |     |    |   |    |       |
| Homo_sapiens_5:136565792-136570795_HERVHF5LTR |        |     |    |   |    |       |
| Homo_sapiens_6:131902010-131906969_HERVHF3LTR | 93.541 | 449 | 27 | 1 | 4  | 452   |
| 1 447 0 677 99                                |        |     |    |   |    |       |
| Homo_sapiens_5:136565792-136570795_HERVHF3LTR |        |     |    |   |    |       |
| Homo_sapiens_6:131902010-131906969_HERVHF5LTR | 93.612 | 454 | 24 | 3 | 5  | 453   |
| 1 454 0 680 99                                |        |     |    |   |    |       |
| Homo_sapiens_5:136565792-136570795_HERVHF5LTR |        |     |    |   |    |       |
| Homo_sapiens_7:83460120-83464935_HERVHF 3LTR  | 93.792 | 451 | 24 | 2 | 2  | 452   |
| 1 447 0 682 99                                |        |     |    |   |    |       |
| Homo_sapiens_5:136565792-136570795_HERVHF3LTR |        |     |    |   |    |       |
| Homo_sapiens_7:83460120-83464935_HERVHF 5LTR  | 94.481 | 453 | 21 | 3 | 4  | 453   |
| 1 452 0 695 99                                |        |     |    |   |    |       |
| Homo_sapiens_5:136565792-136570795_HERVHF5LTR |        |     |    |   |    |       |
| Homo_sapiens_8:114282133-114287268_HERVHF3LTR | 93.636 | 440 | 26 | 1 | 1  | 440   |
| 15 452 0 665 97                               |        |     |    |   |    |       |
| Homo_sapiens_5:136565792-136570795_HERVHF3LTR |        |     |    |   |    |       |
| Homo_sapiens_8:114282133-114287268_HERVHF5LTR | 94.091 | 440 | 24 | 2 | 1  | 439   |
| 12 450 0 670 97                               |        |     |    |   |    |       |
| Homo_sapiens_5:136565792-136570795_HERVHF3LTR |        |     |    |   |    |       |
| Homo_sapiens_8:97201222-97206202_HERVHF 3LTR  | 95.364 | 453 | 17 | 3 | 4  | 453   |
| 4 455 0 713 99                                |        |     |    |   |    |       |
| Homo_sapiens_5:136565792-136570795_HERVHF5LTR |        |     |    |   |    |       |
| Homo_sapiens_8:97201222-97206202_HERVHF 5LTR  | 94     | 450 | 27 | 0 | 3  | 452 1 |

|                                               |        |     |     |     |   |     |  |  |  |
|-----------------------------------------------|--------|-----|-----|-----|---|-----|--|--|--|
| 450                                           | 0      | 691 | 99  |     |   |     |  |  |  |
| Homo_sapiens_5:136565792-136570795_HERVHF3LTR |        |     |     |     |   |     |  |  |  |
| Homo_sapiens_9:121790452-121796319_HERVHF3LTR | 94.26  | 453 | 21  | 3   | 4 | 453 |  |  |  |
| 1                                             | 451    | 0   | 691 | 99  |   |     |  |  |  |
| Homo_sapiens_5:136565792-136570795_HERVHF5LTR |        |     |     |     |   |     |  |  |  |
| Homo_sapiens_9:121790452-121796319_HERVHF5LTR | 94.222 | 450 | 24  | 2   | 3 | 452 |  |  |  |
| 1                                             | 448    | 0   | 688 | 99  |   |     |  |  |  |
| Homo_sapiens_5:136565792-136570795_HERVHF3LTR |        |     |     |     |   |     |  |  |  |
| Homo_sapiens_9:99670236-99675451_HERVHF 3LTR  | 94.469 | 452 | 21  | 3   | 5 | 453 |  |  |  |
| 1                                             | 451    | 0   | 693 | 99  |   |     |  |  |  |
| Homo_sapiens_5:136565792-136570795_HERVHF5LTR |        |     |     |     |   |     |  |  |  |
| Homo_sapiens_9:99670236-99675451_HERVHF 5LTR  | 94.878 | 449 | 23  | 0   | 4 | 452 |  |  |  |
| 1                                             | 449    | 0   | 707 | 99  |   |     |  |  |  |
| Homo_sapiens_5:136565792-136570795_HERVHF3LTR |        |     |     |     |   |     |  |  |  |
| Homo_sapiens_X:87682131-87687194_HERVHF 3LTR  | 94.912 | 452 | 19  | 3   | 5 | 453 |  |  |  |
| 1                                             | 451    | 0   | 702 | 99  |   |     |  |  |  |
| Homo_sapiens_5:136565792-136570795_HERVHF5LTR |        |     |     |     |   |     |  |  |  |
| Homo_sapiens_X:87682131-87687194_HERVHF 5LTR  | 93.318 | 449 | 29  | 1   | 4 | 452 |  |  |  |
| 1                                             | 448    | 0   | 672 | 99  |   |     |  |  |  |
| Homo_sapiens_5:136565792-136570795_HERVHF3LTR |        |     |     |     |   |     |  |  |  |
| Homo_sapiens_X:92824882-92828895_HERVHF 3LTR  | 95.354 | 452 | 17  | 3   | 5 | 453 |  |  |  |
| 1                                             | 451    | 0   | 711 | 99  |   |     |  |  |  |
| Homo_sapiens_5:136565792-136570795_HERVHF5LTR |        |     |     |     |   |     |  |  |  |
| Homo_sapiens_X:92824882-92828895_HERVHF 5LTR  | 94.013 | 451 | 25  | 1   | 4 | 452 |  |  |  |
| 1                                             | 451    | 0   | 690 | 99  |   |     |  |  |  |
| Homo_sapiens_5:136565792-136570795_HERVHF3LTR |        |     |     |     |   |     |  |  |  |
| Homo_sapiens_X:98524704-98529618_HERVHF 3LTR  | 93.202 | 456 | 27  | 3   | 1 | 453 |  |  |  |
| 6                                             | 460    | 0   | 673 | 100 |   |     |  |  |  |
| Homo_sapiens_5:136565792-136570795_HERVHF5LTR |        |     |     |     |   |     |  |  |  |
| Homo_sapiens_X:98524704-98529618_HERVHF 5LTR  | 95.444 | 439 | 19  | 1   | 1 | 438 |  |  |  |
| 6                                             | 444    | 0   | 699 | 97  |   |     |  |  |  |
| Homo_sapiens_5:136565792-136570795_HERVHF3LTR |        |     |     |     |   |     |  |  |  |
| Homo_sapiens_Y:5941562-5945587_HERVHF 3LTR    | 93.584 | 452 | 24  | 4   | 5 | 453 |  |  |  |
| 1                                             | 450    | 0   | 672 | 99  |   |     |  |  |  |
| Homo_sapiens_5:136565792-136570795_HERVHF5LTR |        |     |     |     |   |     |  |  |  |
| Homo_sapiens_Y:5941562-5945587_HERVHF 5LTR    | 93.541 | 449 | 28  | 1   | 4 | 452 |  |  |  |
| 1                                             | 448    | 0   | 676 | 99  |   |     |  |  |  |
| Homo_sapiens_6:115032245-115037164_HERVHF3LTR |        |     |     |     |   |     |  |  |  |
| Homo_sapiens_9:99670236-99675451_HERVHF 3LTR  | 95.575 | 452 | 19  | 1   | 7 | 457 |  |  |  |
| 1                                             | 452    | 0   | 722 | 98  |   |     |  |  |  |
| Homo_sapiens_6:115032245-115037164_HERVHF5LTR |        |     |     |     |   |     |  |  |  |
| Homo_sapiens_9:99670236-99675451_HERVHF 5LTR  | 96.681 | 452 | 15  | 0   | 7 | 458 |  |  |  |
| 1                                             | 452    | 0   | 748 | 99  |   |     |  |  |  |
| Homo_sapiens_6:121620869-121625942_HERVHF3LTR |        |     |     |     |   |     |  |  |  |

|                                               |        |     |    |   |   |     |
|-----------------------------------------------|--------|-----|----|---|---|-----|
| Homo_sapiens_6:125702300-125707310_HERVHF3LTR | 94.915 | 354 | 12 | 3 | 1 | 352 |
| 8 357 1.17E-158550 100                        |        |     |    |   |   |     |
| Homo_sapiens_6:121620869-121625942_HERVHF5LTR |        |     |    |   |   |     |
| Homo_sapiens_6:125702300-125707310_HERVHF5LTR | 96.089 | 358 | 13 | 1 | 1 | 357 |
| 3 360 7.11E-168580 99                         |        |     |    |   |   |     |
| Homo_sapiens_6:121620869-121625942_HERVHF3LTR |        |     |    |   |   |     |
| Homo_sapiens_6:131339252-131344112_HERVHF3LTR | 94.286 | 350 | 19 | 1 | 1 | 350 |
| 8 356 2.12E-155538 99                         |        |     |    |   |   |     |
| Homo_sapiens_6:121620869-121625942_HERVHF5LTR |        |     |    |   |   |     |
| Homo_sapiens_6:131339252-131344112_HERVHF5LTR | 95.251 | 358 | 16 | 1 | 1 | 357 |
| 1 358 1.57E-163566 99                         |        |     |    |   |   |     |
| Homo_sapiens_6:121620869-121625942_HERVHF3LTR |        |     |    |   |   |     |
| Homo_sapiens_6:131902010-131906969_HERVHF3LTR | 95.455 | 352 | 15 | 1 | 1 | 352 |
| 6 356 6.49E-162560 100                        |        |     |    |   |   |     |
| Homo_sapiens_6:121620869-121625942_HERVHF5LTR |        |     |    |   |   |     |
| Homo_sapiens_6:131902010-131906969_HERVHF5LTR | 94.972 | 358 | 16 | 2 | 2 | 357 |
| 1 358 2.33E-161558 99                         |        |     |    |   |   |     |
| Homo_sapiens_6:121620869-121625942_HERVHF3LTR |        |     |    |   |   |     |
| Homo_sapiens_6:90670654-90675059_HERVHF 3LTR  | 94.886 | 352 | 17 | 1 | 1 | 352 |
| 14 364 3.36E-159551 100                       |        |     |    |   |   |     |
| Homo_sapiens_6:121620869-121625942_HERVHF5LTR |        |     |    |   |   |     |
| Homo_sapiens_6:90670654-90675059_HERVHF 5LTR  | 95.531 | 358 | 15 | 1 | 1 | 357 |
| 4 361 3.68E-165571 99                         |        |     |    |   |   |     |
| Homo_sapiens_6:121620869-121625942_HERVHF3LTR |        |     |    |   |   |     |
| Homo_sapiens_6:93830563-93835343_HERVHF 3LTR  | 94.886 | 352 | 17 | 1 | 1 | 352 |
| 17 367 3.36E-159551 100                       |        |     |    |   |   |     |
| Homo_sapiens_6:121620869-121625942_HERVHF5LTR |        |     |    |   |   |     |
| Homo_sapiens_6:93830563-93835343_HERVHF 5LTR  | 94.134 | 358 | 19 | 2 | 1 | 357 |
| 3 359 5.12E-157545 99                         |        |     |    |   |   |     |
| Homo_sapiens_6:121620869-121625942_HERVHF5LTR |        |     |    |   |   |     |
| Homo_sapiens_8:114242056-114246631_HERVHF3LTR | 93.575 | 358 | 22 | 1 | 1 | 357 |
| 4 361 2.18E-155539 99                         |        |     |    |   |   |     |
| Homo_sapiens_6:121620869-121625942_HERVHF3LTR |        |     |    |   |   |     |
| Homo_sapiens_8:114242056-114246631_HERVHF5LTR | 95.17  | 352 | 16 | 1 | 1 | 352 |
| 7 357 2.76E-160555 100                        |        |     |    |   |   |     |
| Homo_sapiens_6:121620869-121625942_HERVHF3LTR |        |     |    |   |   |     |
| Homo_sapiens_8:114282133-114287268_HERVHF3LTR | 94.286 | 350 | 19 | 1 | 1 | 350 |
| 23 371 2.12E-155538 99                        |        |     |    |   |   |     |
| Homo_sapiens_6:121620869-121625942_HERVHF5LTR |        |     |    |   |   |     |
| Homo_sapiens_8:114282133-114287268_HERVHF5LTR | 93.646 | 362 | 22 | 1 | 1 | 361 |
| 15 376 1.47E-157546 100                       |        |     |    |   |   |     |
| Homo_sapiens_6:121620869-121625942_HERVHF3LTR |        |     |    |   |   |     |
| Homo_sapiens_8:97201222-97206202_HERVHF 3LTR  | 95.739 | 352 | 14 | 1 | 1 | 352 |
| 10 360 5.33E-163564 100                       |        |     |    |   |   |     |

Homo\_sapiens\_6:121620869-121625942\_HERVHF5LTR  
Homo\_sapiens\_8:97201222-97206202\_HERVHF 5LTR 94.693 358 18 1 1 357  
1 358 8.12E-161557 99

Homo\_sapiens\_6:121620869-121625942\_HERVHF3LTR  
Homo\_sapiens\_9:121790452-121796319\_HERVHF3LTR 94.886 352 16 2 1 352  
7 356 4.09E-158547 100

Homo\_sapiens\_6:121620869-121625942\_HERVHF5LTR  
Homo\_sapiens\_9:121790452-121796319\_HERVHF5LTR 94.693 358 16 3 1 357  
1 356 1.2E-158 550 99

Homo\_sapiens\_6:121620869-121625942\_HERVHF3LTR  
Homo\_sapiens\_9:99670236-99675451\_HERVHF 3LTR 94.602 352 18 1 1 352  
6 356 1.43E-157546 100

Homo\_sapiens\_6:121620869-121625942\_HERVHF5LTR  
Homo\_sapiens\_9:99670236-99675451\_HERVHF 5LTR 94.958 357 17 1 2 357  
1 357 6.66E-162560 99

Homo\_sapiens\_6:121620869-121625942\_HERVHF3LTR  
Homo\_sapiens\_X:87682131-87687194\_HERVHF 3LTR 96.591 352 11 1 1 352  
6 356 2.42E-167578 100

Homo\_sapiens\_6:121620869-121625942\_HERVHF5LTR  
Homo\_sapiens\_X:87682131-87687194\_HERVHF 5LTR 94.678 357 17 2 2 357  
1 356 3.45E-159552 99

Homo\_sapiens\_6:121620869-121625942\_HERVHF3LTR  
Homo\_sapiens\_X:92824882-92828895\_HERVHF 3LTR 95.455 352 15 1 1 352  
6 356 6.49E-162560 100

Homo\_sapiens\_6:121620869-121625942\_HERVHF5LTR  
Homo\_sapiens\_X:92824882-92828895\_HERVHF 5LTR 94.986 359 15 2 2 357  
1 359 6.66E-162561 99

Homo\_sapiens\_6:121620869-121625942\_HERVHF3LTR  
Homo\_sapiens\_X:98524704-98529618\_HERVHF 3LTR 94.886 352 17 1 1 352  
15 365 3.36E-159551 100

Homo\_sapiens\_6:121620869-121625942\_HERVHF5LTR  
Homo\_sapiens\_X:98524704-98529618\_HERVHF 5LTR 94.986 359 16 2 1 357  
8 366 6.66E-162560 99

Homo\_sapiens\_6:131339252-131344112\_HERVHF3LTR  
Homo\_sapiens\_8:97201222-97206202\_HERVHF 3LTR 94.493 454 25 0 1 454  
3 456 0 707 100

Homo\_sapiens\_6:131339252-131344112\_HERVHF5LTR  
Homo\_sapiens\_8:97201222-97206202\_HERVHF 5LTR 95.143 453 22 0 1 453  
1 453 0 719 100

Homo\_sapiens\_6:131339252-131344112\_HERVHF3LTR  
Homo\_sapiens\_9:121790452-121796319\_HERVHF3LTR 94.702 453 23 1 2 454  
1 452 0 706 99

Homo\_sapiens\_6:131339252-131344112\_HERVHF5LTR  
Homo\_sapiens\_9:121790452-121796319\_HERVHF5LTR 95.143 453 20 2 1 453



|                                               |                                               |      |        |     |    |   |    |     |  |
|-----------------------------------------------|-----------------------------------------------|------|--------|-----|----|---|----|-----|--|
| 1                                             | 451                                           | 0    | 711    | 100 |    |   |    |     |  |
| Homo_sapiens_6:131339252-131344112_HERVHF3LTR |                                               |      |        |     |    |   |    |     |  |
|                                               | Homo_sapiens_X:92824882-92828895_HERVHF       | 3LTR | 94.912 | 452 | 23 | 0 | 3  | 454 |  |
| 1                                             | 452                                           | 0    | 712    | 99  |    |   |    |     |  |
| Homo_sapiens_6:131339252-131344112_HERVHF5LTR |                                               |      |        |     |    |   |    |     |  |
|                                               | Homo_sapiens_X:92824882-92828895_HERVHF       | 5LTR | 96.035 | 454 | 16 | 1 | 2  | 453 |  |
| 1                                             | 454                                           | 0    | 736    | 99  |    |   |    |     |  |
| Homo_sapiens_6:131902010-131906969_HERVHF5LTR |                                               |      |        |     |    |   |    |     |  |
|                                               | Homo_sapiens_8:97201222-97206202_HERVHF       | 3LTR | 95.165 | 455 | 19 | 2 | 1  | 455 |  |
| 5                                             | 456                                           | 0    | 716    | 99  |    |   |    |     |  |
| Homo_sapiens_6:131902010-131906969_HERVHF3LTR |                                               |      |        |     |    |   |    |     |  |
|                                               | Homo_sapiens_8:97201222-97206202_HERVHF       | 5LTR | 95.354 | 452 | 19 | 1 | 1  | 450 |  |
| 2                                             | 453                                           | 0    | 719    | 99  |    |   |    |     |  |
| Homo_sapiens_6:131902010-131906969_HERVHF3LTR |                                               |      |        |     |    |   |    |     |  |
|                                               | Homo_sapiens_X:87682131-87687194_HERVHF       | 3LTR | 95.796 | 452 | 17 | 1 | 1  | 450 |  |
| 1                                             | 452                                           | 0    | 728    | 99  |    |   |    |     |  |
| Homo_sapiens_6:131902010-131906969_HERVHF5LTR |                                               |      |        |     |    |   |    |     |  |
|                                               | Homo_sapiens_X:87682131-87687194_HERVHF       | 5LTR | 95.385 | 455 | 17 | 3 | 1  | 455 |  |
| 1                                             | 451                                           | 0    | 717    | 99  |    |   |    |     |  |
| Homo_sapiens_8:114282133-114287268_HERVHF3LTR |                                               |      |        |     |    |   |    |     |  |
|                                               | Homo_sapiens_8:97201222-97206202_HERVHF       | 3LTR | 94.796 | 442 | 21 | 1 | 14 | 453 |  |
| 1                                             | 442                                           | 0    | 691    | 96  |    |   |    |     |  |
| Homo_sapiens_8:114282133-114287268_HERVHF5LTR |                                               |      |        |     |    |   |    |     |  |
|                                               | Homo_sapiens_8:97201222-97206202_HERVHF       | 5LTR | 94.521 | 438 | 22 | 1 | 15 | 450 |  |
| 1                                             | 438                                           | 0    | 680    | 97  |    |   |    |     |  |
| Homo_sapiens_8:114282133-114287268_HERVHF3LTR |                                               |      |        |     |    |   |    |     |  |
|                                               | Homo_sapiens_9:121790452-121796319_HERVHF3LTR |      | 94.977 | 438 | 19 | 2 | 17 | 452 |  |
| 1                                             | 437                                           | 0    | 685    | 95  |    |   |    |     |  |
| Homo_sapiens_8:114282133-114287268_HERVHF5LTR |                                               |      |        |     |    |   |    |     |  |
|                                               | Homo_sapiens_9:121790452-121796319_HERVHF5LTR |      | 95.183 | 436 | 17 | 3 | 15 | 448 |  |
| 1                                             | 434                                           | 0    | 682    | 96  |    |   |    |     |  |
| Homo_sapiens_8:114282133-114287268_HERVHF3LTR |                                               |      |        |     |    |   |    |     |  |
|                                               | Homo_sapiens_9:99670236-99675451_HERVHF       | 3LTR | 94.357 | 443 | 23 | 1 | 18 | 458 |  |
| 1                                             | 443                                           | 0    | 684    | 96  |    |   |    |     |  |
| Homo_sapiens_8:114282133-114287268_HERVHF5LTR |                                               |      |        |     |    |   |    |     |  |
|                                               | Homo_sapiens_9:99670236-99675451_HERVHF       | 5LTR | 95.195 | 437 | 19 | 1 | 16 | 450 |  |
| 1                                             | 437                                           | 0    | 691    | 97  |    |   |    |     |  |
| Homo_sapiens_8:114282133-114287268_HERVHF3LTR |                                               |      |        |     |    |   |    |     |  |
|                                               | Homo_sapiens_X:87682131-87687194_HERVHF       | 3LTR | 95.652 | 437 | 17 | 1 | 18 | 452 |  |
| 1                                             | 437                                           | 0    | 700    | 95  |    |   |    |     |  |
| Homo_sapiens_8:114282133-114287268_HERVHF5LTR |                                               |      |        |     |    |   |    |     |  |
|                                               | Homo_sapiens_X:87682131-87687194_HERVHF       | 5LTR | 94.508 | 437 | 21 | 2 | 16 | 450 |  |
| 1                                             | 436                                           | 0    | 674    | 97  |    |   |    |     |  |
| Homo_sapiens_8:114282133-114287268_HERVHF3LTR |                                               |      |        |     |    |   |    |     |  |

|                                                |                      |        |     |    |   |    |     |
|------------------------------------------------|----------------------|--------|-----|----|---|----|-----|
| Homo_sapiens_X:92824882-92828895_HERVHF        | 3LTR                 | 94.966 | 437 | 20 | 1 | 18 | 452 |
| 1                                              | 437 0 687 95         |        |     |    |   |    |     |
| Homo_sapiens_8:114282133-114287268_HERVHF 5LTR |                      |        |     |    |   |    |     |
| Homo_sapiens_X:92824882-92828895_HERVHF        | 5LTR                 | 95.444 | 439 | 16 | 2 | 16 | 450 |
| 1                                              | 439 0 697 97         |        |     |    |   |    |     |
| Homo_sapiens_8:114282133-114287268_HERVHF 3LTR |                      |        |     |    |   |    |     |
| Homo_sapiens_X:98524704-98529618_HERVHF        | 3LTR                 | 94.292 | 438 | 23 | 1 | 17 | 452 |
| 9                                              | 446 0 675 95         |        |     |    |   |    |     |
| Homo_sapiens_8:114282133-114287268_HERVHF 5LTR |                      |        |     |    |   |    |     |
| Homo_sapiens_X:98524704-98529618_HERVHF        | 5LTR                 | 95.195 | 437 | 18 | 2 | 15 | 448 |
| 8                                              | 444 0 688 96         |        |     |    |   |    |     |
| Homo_sapiens_8:114282133-114287268_HERVHF 5LTR |                      |        |     |    |   |    |     |
| Homo_sapiens_Y:5941562-5945587_HERVHF          | 3LTR                 | 94.737 | 437 | 20 | 2 | 16 | 450 |
| 1                                              | 436 0 679 97         |        |     |    |   |    |     |
| Homo_sapiens_8:114282133-114287268_HERVHF 3LTR |                      |        |     |    |   |    |     |
| Homo_sapiens_Y:5941562-5945587_HERVHF          | 5LTR                 | 94.737 | 437 | 20 | 2 | 18 | 452 |
| 1                                              | 436 0 679 95         |        |     |    |   |    |     |
| Homo_sapiens_9:80137640-80142712_HERVHF 3LTR   |                      |        |     |    |   |    |     |
| Homo_sapiens_X:87682131-87687194_HERVHF        | 3LTR                 | 95.087 | 346 | 13 | 2 | 1  | 343 |
| 1                                              | 345 1.69E-156543 100 |        |     |    |   |    |     |
| Homo_sapiens_9:80137640-80142712_HERVHF 5LTR   |                      |        |     |    |   |    |     |
| Homo_sapiens_X:87682131-87687194_HERVHF        | 5LTR                 | 96.21  | 343 | 12 | 1 | 1  | 343 |
| 3                                              | 344 7.69E-161557 100 |        |     |    |   |    |     |
| Homo_sapiens_9:80137640-80142712_HERVHF 3LTR   |                      |        |     |    |   |    |     |
| Homo_sapiens_X:92824882-92828895_HERVHF        | 3LTR                 | 94.493 | 345 | 15 | 2 | 1  | 342 |
| 1                                              | 344 3.06E-153532 99  |        |     |    |   |    |     |
| Homo_sapiens_9:80137640-80142712_HERVHF 5LTR   |                      |        |     |    |   |    |     |
| Homo_sapiens_X:92824882-92828895_HERVHF        | 5LTR                 | 95.64  | 344 | 13 | 1 | 1  | 342 |
| 3                                              | 346 3.27E-159551 99  |        |     |    |   |    |     |
| Homo_sapiens_X:90773760-90778707_HERVHF 3LTR   |                      |        |     |    |   |    |     |
| Homo_sapiens_X:92824882-92828895_HERVHF        | 3LTR                 | 94.866 | 448 | 23 | 0 | 1  | 448 |
| 2                                              | 449 0 705 100        |        |     |    |   |    |     |
| Homo_sapiens_X:90773760-90778707_HERVHF 5LTR   |                      |        |     |    |   |    |     |
| Homo_sapiens_X:92824882-92828895_HERVHF        | 5LTR                 | 92.683 | 451 | 28 | 3 | 1  | 446 |
| 2                                              | 452 0 656 100        |        |     |    |   |    |     |
| Homo_sapiens_X:90773760-90778707_HERVHF 3LTR   |                      |        |     |    |   |    |     |
| Homo_sapiens_Y:4355841-4360781_HERVHF          | 3LTR                 | 97.321 | 448 | 11 | 1 | 1  | 448 |
| 1                                              | 447 0 751 100        |        |     |    |   |    |     |
| Homo_sapiens_X:90773760-90778707_HERVHF 5LTR   |                      |        |     |    |   |    |     |
| Homo_sapiens_Y:4355841-4360781_HERVHF          | 5LTR                 | 95.546 | 449 | 17 | 2 | 1  | 446 |
| 1                                              | 449 0 714 100        |        |     |    |   |    |     |
| Homo_sapiens_X:90773760-90778707_HERVHF 3LTR   |                      |        |     |    |   |    |     |
| Homo_sapiens_Y:5325239-5329976_HERVHF          | 3LTR                 | 94.196 | 448 | 25 | 1 | 1  | 448 |
| 4                                              | 450 0 688 100        |        |     |    |   |    |     |

Homo\_sapiens\_X:90773760-90778707\_HERVHF 5LTR  
Homo\_sapiens\_Y:5325239-5329976\_HERVHF 5LTR 93.318 449 25 4 1 446  
7 453 0 662 100

Homo\_sapiens\_Y:4355841-4360781\_HERVHF 3LTR  
Homo\_sapiens\_Y:5941562-5945587\_HERVHF 3LTR 93.778 450 26 2 1 449  
2 450 0 679 100

Homo\_sapiens\_Y:4355841-4360781\_HERVHF 5LTR  
Homo\_sapiens\_Y:5941562-5945587\_HERVHF 5LTR 93.792 451 25 3 1 450  
2 450 0 677 100

Homo\_sapiens\_Y:5325239-5329976\_HERVHF 3LTR  
Homo\_sapiens\_Y:5941562-5945587\_HERVHF 3LTR 95.122 451 20 2 3 452  
1 450 0 708 99

Homo\_sapiens\_Y:5325239-5329976\_HERVHF 5LTR  
Homo\_sapiens\_Y:5941562-5945587\_HERVHF 5LTR 94.444 450 24 1 6 454  
1 450 0 696 99

Hylobates\_lar\_LG01:19437067-19443389\_HERVHF 5LTR  
Hylobates\_lar\_LG14:29706095-29711000\_HERVHF 3LTR 93.367 392 23 2 2  
392 3 392 2.07E-169584 99

Hylobates\_lar\_LG01:19437067-19443389\_HERVHF 3LTR  
Hylobates\_lar\_LG14:29706095-29711000\_HERVHF 5LTR 94.472 398 22 0 1  
398 7 404 2.92E-180619 100

Hylobates\_lar\_LG01:19437067-19443389\_HERVHF 3LTR  
Hylobates\_lar\_LG18:30372700-30377982\_HERVHF 3LTR 94.724 398 20 1 1  
398 3 399 2.92E-180620 100

Hylobates\_lar\_LG01:19437067-19443389\_HERVHF 5LTR  
Hylobates\_lar\_LG18:30372700-30377982\_HERVHF 5LTR 93.35 391 25 1 2  
391 2 392 5.92E-170585 99

Hylobates\_lar\_LG01:244299162-244304632\_HERVHF 5LTR  
Hylobates\_lar\_LG20:16903045-16908295\_HERVHF 3LTR 93.369 377 23 2 1  
376 52 427 2.28E-162561 99

Hylobates\_lar\_LG01:244299162-244304632\_HERVHF 3LTR  
Hylobates\_lar\_LG20:16903045-16908295\_HERVHF 5LTR 94.947 376 15 4 3  
377 58 430 8.48E-168579 99

Hylobates\_lar\_LG03:158489633-158494538\_HERVHF 3LTR  
Hylobates\_lar\_LG17:76674886-76679638\_HERVHF 3LTR 94.66 412 20 2 1  
412 1 410 0 637 99

Hylobates\_lar\_LG03:158489633-158494538\_HERVHF 5LTR  
Hylobates\_lar\_LG17:76674886-76679638\_HERVHF 5LTR 95.25 400 17 2 3  
402 1 398 0 629 97

Hylobates\_lar\_LG04:133444289-133449196\_HERVHF 3LTR  
Hylobates\_lar\_LG04:26177466-26182427\_HERVHF 3LTR 91.098 337 27 3 15  
351 78 411 4.34E-133462 96

Hylobates\_lar\_LG04:133444289-133449196\_HERVHF 5LTR  
Hylobates\_lar\_LG04:26177466-26182427\_HERVHF 5LTR 94.767 344 18 0 1

344 64 407 1.93E-156540 100  
 Hylobates\_lar\_LG04:133444289-133449196\_HERVHF 3LTR  
 Hylobates\_lar\_LG08:125778193-125783483\_HERVHF 3LTR 95.157 351 17 0 1  
 351 103 453 2.56E-161557 100  
 Hylobates\_lar\_LG04:133444289-133449196\_HERVHF 5LTR  
 Hylobates\_lar\_LG08:125778193-125783483\_HERVHF 5LTR 91.071 336 28 2 11  
 344 115 450 1.22E-133464 97  
 Hylobates\_lar\_LG04:133444289-133449196\_HERVHF 3LTR  
 Hylobates\_lar\_LG08:96760714-96766571\_HERVHF 3LTR 91.691 337 25 3 15  
 351 77 410 8.37E-136471 96  
 Hylobates\_lar\_LG04:133444289-133449196\_HERVHF 5LTR  
 Hylobates\_lar\_LG08:96760714-96766571\_HERVHF 5LTR 94.477 344 18 1 1  
 344 63 405 9.98E-154532 100  
 Hylobates\_lar\_LG04:133444289-133449196\_HERVHF 3LTR  
 Hylobates\_lar\_LG09:112447534-112452391\_HERVHF 3LTR 91.691 337 25 2 15  
 351 77 410 6.87E-137476 96  
 Hylobates\_lar\_LG04:133444289-133449196\_HERVHF 5LTR  
 Hylobates\_lar\_LG09:112447534-112452391\_HERVHF 5LTR 92.878 337 22 2 1  
 335 63 399 2.51E-142493 97  
 Hylobates\_lar\_LG04:133444289-133449196\_HERVHF 3LTR  
 Hylobates\_lar\_LG16:101610592-101617187\_HERVHF 3LTR 91.395 337 28 1 15  
 351 76 411 2.4E-136 474 96  
 Hylobates\_lar\_LG04:133444289-133449196\_HERVHF 5LTR  
 Hylobates\_lar\_LG16:101610592-101617187\_HERVHF 5LTR 94.783 345 17 1 1  
 344 64 408 6.72E-156538 100  
 Hylobates\_lar\_LG04:133444289-133449196\_HERVHF 5LTR  
 Hylobates\_lar\_LG17:81173180-81178674\_HERVHF 3LTR 91.239 331 28 1 15  
 344 116 446 4.25E-133463 96  
 Hylobates\_lar\_LG04:133444289-133449196\_HERVHF 3LTR  
 Hylobates\_lar\_LG17:81173180-81178674\_HERVHF 5LTR 92.857 350 24 1 2  
 351 103 451 7.83E-149516 99  
 Hylobates\_lar\_LG04:133444289-133449196\_HERVHF 3LTR  
 Hylobates\_lar\_LG20:16903045-16908295\_HERVHF 3LTR 91.743 327 25 2 15  
 341 92 416 1.51E-132462 93  
 Hylobates\_lar\_LG04:133444289-133449196\_HERVHF 5LTR  
 Hylobates\_lar\_LG20:16903045-16908295\_HERVHF 5LTR 94.428 341 19 0 1  
 341 81 421 3.48E-153530 99  
 Hylobates\_lar\_LG06:38831828-38837745\_HERVHF 3LTR  
 Hylobates\_lar\_LG08:96760714-96766571\_HERVHF 3LTR 93.311 299 17 3 1  
 299 116 411 4.41E-126439 95  
 Hylobates\_lar\_LG06:38831828-38837745\_HERVHF 5LTR  
 Hylobates\_lar\_LG08:96760714-96766571\_HERVHF 5LTR 92.977 299 18 2 2  
 298 114 411 4.34E-126439 96  
 Hylobates\_lar\_LG06:38831828-38837745\_HERVHF 5LTR

|                                               |      |        |     |    |   |   |
|-----------------------------------------------|------|--------|-----|----|---|---|
| Hylobates_lar_LG09:112447534-112452391_HERVHF | 3LTR | 91.639 | 299 | 21 | 2 | 2 |
| 298 115 411 1.16E-120422                      | 96   |        |     |    |   |   |
| Hylobates_lar_LG06:38831828-38837745_HERVHF   | 3LTR |        |     |    |   |   |
| Hylobates_lar_LG09:112447534-112452391_HERVHF | 5LTR | 93.793 | 290 | 16 | 2 | 1 |
| 289 116 404 5.38E-125435                      | 92   |        |     |    |   |   |
| Hylobates_lar_LG06:38831828-38837745_HERVHF   | 3LTR |        |     |    |   |   |
| Hylobates_lar_LG16:101610592-101617187_HERVHF | 3LTR | 92.208 | 308 | 23 | 1 | 1 |
| 308 115 421 1.04E-127444                      | 98   |        |     |    |   |   |
| Hylobates_lar_LG06:38831828-38837745_HERVHF   | 5LTR |        |     |    |   |   |
| Hylobates_lar_LG16:101610592-101617187_HERVHF | 5LTR | 92.617 | 298 | 20 | 1 | 2 |
| 297 116 413 5.29E-125436                      | 95   |        |     |    |   |   |
| Hylobates_lar_LG06:38831828-38837745_HERVHF   | 5LTR |        |     |    |   |   |
| Hylobates_lar_LG20:16903045-16908295_HERVHF   | 3LTR | 92.642 | 299 | 20 | 1 | 2 |
| 298 129 427 1.52E-125438                      | 96   |        |     |    |   |   |
| Hylobates_lar_LG06:38831828-38837745_HERVHF   | 3LTR |        |     |    |   |   |
| Hylobates_lar_LG20:16903045-16908295_HERVHF   | 5LTR | 96.321 | 299 | 9  | 2 | 1 |
| 299 134 430 4.13E-139483                      | 95   |        |     |    |   |   |
| Hylobates_lar_LG08:128737715-128743136_HERVHF | 5LTR |        |     |    |   |   |
| Hylobates_lar_LG18:30372700-30377982_HERVHF   | 3LTR | 93.035 | 402 | 27 | 1 | 1 |
| 402 2 402 3.41E-173596                        | 99   |        |     |    |   |   |
| Hylobates_lar_LG08:128737715-128743136_HERVHF | 3LTR |        |     |    |   |   |
| Hylobates_lar_LG18:30372700-30377982_HERVHF   | 5LTR | 93.797 | 403 | 25 | 0 | 1 |
| 403 1 403 1.26E-178615                        | 99   |        |     |    |   |   |
| Hylobates_lar_LG11:110189891-110195315_HERVHF | 5LTR |        |     |    |   |   |
| Hylobates_lar_LG22:51329841-51335101_HERVHF   | 3LTR | 93.949 | 314 | 18 | 1 | 1 |
| 313 33 346 1.74E-137478                       | 100  |        |     |    |   |   |
| Hylobates_lar_LG11:110189891-110195315_HERVHF | 3LTR |        |     |    |   |   |
| Hylobates_lar_LG22:51329841-51335101_HERVHF   | 5LTR | 96.141 | 311 | 12 | 0 | 1 |
| 311 20 330 1.02E-146508                       | 100  |        |     |    |   |   |
| Hylobates_lar_LG12:55320953-55325892_HERVHF   | 5LTR |        |     |    |   |   |
| Hylobates_lar_LG16:101610592-101617187_HERVHF | 3LTR | 91.026 | 312 | 27 | 1 | 1 |
| 311 85 396 1.95E-124434                       | 95   |        |     |    |   |   |
| Hylobates_lar_LG12:55320953-55325892_HERVHF   | 3LTR |        |     |    |   |   |
| Hylobates_lar_LG16:101610592-101617187_HERVHF | 5LTR | 90.123 | 324 | 30 | 2 | 1 |
| 323 91 413 1.93E-124434                       | 100  |        |     |    |   |   |
| Hylobates_lar_LG12:55320953-55325892_HERVHF   | 3LTR |        |     |    |   |   |
| Hylobates_lar_LG17:76674886-76679638_HERVHF   | 3LTR | 90.402 | 323 | 28 | 3 | 1 |
| 323 91 410 6.73E-124433                       | 100  |        |     |    |   |   |
| Hylobates_lar_LG12:55320953-55325892_HERVHF   | 5LTR |        |     |    |   |   |
| Hylobates_lar_LG17:76674886-76679638_HERVHF   | 5LTR | 93.865 | 326 | 19 | 1 | 1 |
| 326 84 408 6.79E-143495                       | 100  |        |     |    |   |   |
| Hylobates_lar_LG12:55320953-55325892_HERVHF   | 3LTR |        |     |    |   |   |
| Hylobates_lar_LG20:16903045-16908295_HERVHF   | 3LTR | 92.284 | 324 | 22 | 3 | 1 |
| 323 105 426 1.39E-132462                      | 100  |        |     |    |   |   |

Hylobates\_lar\_LG12:55320953-55325892\_HERVHF 5LTR  
Hylobates\_lar\_LG20:16903045-16908295\_HERVHF 5LTR 92.661 327 22 2 1  
326 104 429 6.36E-137475 100

Hylobates\_lar\_LG14:9027554-9034478\_HERVHF 3LTR  
Hylobates\_lar\_LG20:16903045-16908295\_HERVHF 3LTR 91.981 424 28 3 1  
423 8 426 2.39E-175604 100

Hylobates\_lar\_LG14:9027554-9034478\_HERVHF 5LTR  
Hylobates\_lar\_LG20:16903045-16908295\_HERVHF 5LTR 93.689 412 24 2 2  
412 18 428 3.02E-180619 99

Hylobates\_lar\_LG18:1602090-1607566\_HERVHF 3LTR  
Hylobates\_lar\_LG18:30372700-30377982\_HERVHF 3LTR 94.832 387 18 2 1  
387 1 385 7.6E-175 601 100

Hylobates\_lar\_LG18:1602090-1607566\_HERVHF 5LTR  
Hylobates\_lar\_LG18:30372700-30377982\_HERVHF 5LTR 93.668 379 24 0 1  
379 8 386 2.96E-167576 100

Mandrillus\_leucophaeus\_scaffold154115:4047151-4051051\_HERVHF 3LTR  
Mandrillus\_leucophaeus\_scaffold154151:4047269-4051169\_HERVHF 3LTR 100 349 0  
0 1 349 1 349 0 630 100

Mandrillus\_leucophaeus\_scaffold154115:4047151-4051051\_HERVHF 5LTR  
Mandrillus\_leucophaeus\_scaffold154151:4047269-4051169\_HERVHF 5LTR 99.723 361  
1 0 1 361 1 361 0 647 100

Mandrillus\_leucophaeus\_scaffold245:12872571-12877377\_HERVHF 3LTR  
Mandrillus\_leucophaeus\_scaffold245:35324809-35330542\_HERVHF 3LTR 92.986 442  
28 2 2 440 1 442 0 652 97

Mandrillus\_leucophaeus\_scaffold245:12872571-12877377\_HERVHF 5LTR  
Mandrillus\_leucophaeus\_scaffold245:35324809-35330542\_HERVHF 5LTR 93.363 452  
29 1 1 451 2 453 0 677 99

Mandrillus\_sphinx\_Contig122:4604884-4610567\_HERVHF 3LTR  
Mandrillus\_sphinx\_Contig70:3296943-3302434\_HERVHF 3LTR 91.729 399 26 4  
1 395 1 396 2.96E-163560 100

Mandrillus\_sphinx\_Contig122:4604884-4610567\_HERVHF 5LTR  
Mandrillus\_sphinx\_Contig70:3296943-3302434\_HERVHF 5LTR 92.5 400 24 5 1  
398 1 396 5.76E-166570 100

Pan\_paniscus\_CM003383.1:80218929-80226889\_HERVHF 3LTR  
Pan\_paniscus\_CM003395.1:125949754-125955858\_HERVHF 3LTR 92.216 334 25  
1 1 334 99 431 1.84E-139482 99

Pan\_paniscus\_CM003383.1:80218929-80226889\_HERVHF 5LTR  
Pan\_paniscus\_CM003395.1:125949754-125955858\_HERVHF 5LTR 92.216 334 25  
1 1 334 98 430 1.82E-139482 100

Pan\_paniscus\_CM003386.1:21439220-21443575\_HERVHF 3LTR  
Pan\_paniscus\_CM003404.1:17002689-17007906\_HERVHF 3LTR 92.804 403 26 2  
4 403 2 404 5.95E-172590 99

Pan\_paniscus\_CM003386.1:21439220-21443575\_HERVHF 5LTR  
Pan\_paniscus\_CM003404.1:17002689-17007906\_HERVHF 5LTR 94.059 404 23 1

3 406 3 405 4.31E-180618 99  
 Pan\_paniscus\_CM003388.1:38957485-38963391\_HERVHF 5LTR  
 Pan\_paniscus\_CM003395.1:125949754-125955858\_HERVHF 3LTR 94.699 415 21  
 1 7 420 2 416 0 646 99  
 Pan\_paniscus\_CM003388.1:38957485-38963391\_HERVHF 3LTR  
 Pan\_paniscus\_CM003395.1:125949754-125955858\_HERVHF 5LTR 94.444 414 23  
 0 1 414 2 415 0 644 100  
 Pan\_troglodytes\_NBAG03002951.1:15908-20650\_HERVHF 3LTR  
 Pan\_troglodytes\_NBAG03002955.1:15884-20626\_HERVHF 3LTR 100 403 0 0 1  
 403 1 403 0 728 100  
 Pan\_troglodytes\_NBAG03002951.1:15908-20650\_HERVHF 5LTR  
 Pan\_troglodytes\_NBAG03002955.1:15884-20626\_HERVHF 5LTR 100 401 0 0 1  
 401 1 401 0 724 100  
 Pongo\_abelii\_CM009262.2:150433372-150438172\_HERVHF 5LTR  
 Pongo\_abelii\_CM009265.2:69536489-69541419\_HERVHF 3LTR 92.394 355 26 1  
 1 354 69 423 4.09E-149516 98  
 Pongo\_abelii\_CM009262.2:150433372-150438172\_HERVHF 3LTR  
 Pongo\_abelii\_CM009265.2:69536489-69541419\_HERVHF 5LTR 93.902 328 17 2  
 13 337 90 417 3.68E-143496 93  
 Pongo\_abelii\_CM009262.2:20268319-20272884\_HERVHF 3LTR  
 Pongo\_abelii\_CM009263.2:104709278-104714293\_HERVHF 3LTR 94.248 452 25 1  
 2 452 1 452 0 695 99  
 Pongo\_abelii\_CM009262.2:20268319-20272884\_HERVHF 5LTR  
 Pongo\_abelii\_CM009263.2:104709278-104714293\_HERVHF 5LTR 95.354 452 20 1  
 4 454 1 452 0 718 99  
 Pongo\_abelii\_CM009262.2:20268319-20272884\_HERVHF 3LTR  
 Pongo\_abelii\_CM009264.2:93735033-93740006\_HERVHF 3LTR 94.027 452 26 1  
 2 452 1 452 0 691 99  
 Pongo\_abelii\_CM009262.2:20268319-20272884\_HERVHF 5LTR  
 Pongo\_abelii\_CM009264.2:93735033-93740006\_HERVHF 5LTR 94.469 452 24 1  
 4 454 1 452 0 700 99  
 Pongo\_abelii\_CM009265.2:189763222-189768502\_HERVHF 3LTR  
 Pongo\_abelii\_CM009266.2:114896582-114901546\_HERVHF 3LTR 92.219 347 25 2  
 11 357 40 384 2.68E-143498 97  
 Pongo\_abelii\_CM009265.2:189763222-189768502\_HERVHF 5LTR  
 Pongo\_abelii\_CM009266.2:114896582-114901546\_HERVHF 5LTR 91.908 346 25 3  
 1 345 28 371 1.34E-140488 100  
 Pongo\_abelii\_CM009265.2:189763222-189768502\_HERVHF 3LTR  
 Pongo\_abelii\_CM009266.2:130784985-130789829\_HERVHF 3LTR 91.185 363 20 6  
 1 357 52 408 9.34E-143495 100  
 Pongo\_abelii\_CM009265.2:189763222-189768502\_HERVHF 5LTR  
 Pongo\_abelii\_CM009266.2:130784985-130789829\_HERVHF 5LTR 92.045 352 20 4  
 1 345 41 391 7.39E-144499 100  
 Pongo\_abelii\_CM009265.2:189763222-189768502\_HERVHF 3LTR

Pongo\_abelii\_CM009266.2:137847220-137852125\_HERVHF 3LTR 91.036 357 19 4  
 1 357 28 371 3.26E-142494 100  
 Pongo\_abelii\_CM009265.2:189763222-189768502\_HERVHF 5LTR  
 Pongo\_abelii\_CM009266.2:137847220-137852125\_HERVHF 5LTR 91.066 347 19 3  
 1 345 27 363 1.63E-139484 100  
 Pongo\_abelii\_CM009265.2:189763222-189768502\_HERVHF 3LTR  
 Pongo\_abelii\_CM009270.2:678761-683551\_HERVHF 3LTR 91.877 357 22 5 1  
 357 29 378 2.68E-143498 100  
 Pongo\_abelii\_CM009265.2:189763222-189768502\_HERVHF 5LTR  
 Pongo\_abelii\_CM009270.2:678761-683551\_HERVHF 5LTR 92.754 345 22 3 1  
 343 28 371 7.39E-144499 99  
 Pongo\_abelii\_CM009266.2:116229328-116234274\_HERVHF 5LTR  
 Pongo\_abelii\_CM009266.2:137847220-137852125\_HERVHF 3LTR 96.078 306 12 0  
 7 312 1 306 6.65E-144499 98  
 Pongo\_abelii\_CM009266.2:116229328-116234274\_HERVHF 3LTR  
 Pongo\_abelii\_CM009266.2:137847220-137852125\_HERVHF 5LTR 94.855 311 14 2  
 8 317 1 310 5.22E-139482 97  
 Pongo\_abelii\_CM009266.2:133993424-133998349\_HERVHF 3LTR  
 Pongo\_abelii\_CM009266.2:137847220-137852125\_HERVHF 3LTR 94.118 289 15 2  
 1 287 115 403 1.87E-125438 93  
 Pongo\_abelii\_CM009266.2:133993424-133998349\_HERVHF 5LTR  
 Pongo\_abelii\_CM009266.2:137847220-137852125\_HERVHF 5LTR 95.374 281 11 2  
 1 279 123 403 1.5E-126 442 93  
 Pongo\_abelii\_CM009266.2:166936585-166941496\_HERVHF 5LTR  
 Pongo\_abelii\_CM009268.2:139999900-140006933\_HERVHF 3LTR 92.768 401 26 2  
 1 399 1 400 2.16E-170587 100  
 Pongo\_abelii\_CM009266.2:166936585-166941496\_HERVHF 3LTR  
 Pongo\_abelii\_CM009268.2:139999900-140006933\_HERVHF 5LTR 93.97 398 23 1  
 2 399 1 397 2.32E-176607 99  
 Pongo\_abelii\_CM009266.2:170888490-170893531\_HERVHF 3LTR  
 Pongo\_abelii\_CM009266.2:26777284-26782315\_HERVHF 3LTR 92.257 452 32 3  
 1 450 2 452 0 647 100  
 Pongo\_abelii\_CM009266.2:170888490-170893531\_HERVHF 5LTR  
 Pongo\_abelii\_CM009266.2:26777284-26782315\_HERVHF 5LTR 92.494 453 30 3  
 7 457 1 451 0 655 98  
 Pongo\_abelii\_CM009266.2:170888490-170893531\_HERVHF 3LTR  
 Pongo\_abelii\_CM009267.2:117783136-117788261\_HERVHF 3LTR 92.035 452 32 4  
 2 450 2 452 0 639 99  
 Pongo\_abelii\_CM009266.2:170888490-170893531\_HERVHF 5LTR  
 Pongo\_abelii\_CM009267.2:117783136-117788261\_HERVHF 5LTR 92.07 454 33 2  
 8 458 1 454 0 651 98  
 Pongo\_abelii\_CM009266.2:170888490-170893531\_HERVHF 5LTR  
 Pongo\_abelii\_CM009269.2:81495901-81500897\_HERVHF 3LTR 93.85 439 25 1  
 8 444 1 439 0 668 95



Pongo\_abelii\_CM009266.2:170888490-170893531\_HERVHF 3LTR  
Pongo\_abelii\_CM009269.2:81495901-81500897\_HERVHF 5LTR 92.239 451 33 2  
2 450 2 452 0 649 99

Pongo\_abelii\_CM009269.2:49137324-49142107\_HERVHF 3LTR  
Pongo\_abelii\_CM009269.2:60854253-60859315\_HERVHF 3LTR 96.11 437 17 0  
3 439 1 437 0 712 99

Pongo\_abelii\_CM009269.2:49137324-49142107\_HERVHF 5LTR  
Pongo\_abelii\_CM009269.2:60854253-60859315\_HERVHF 5LTR 96.339 437 14 2  
4 439 1 436 0 710 99

Pongo\_abelii\_CM009271.2:100985548-100990741\_HERVHF 5LTR  
Pongo\_abelii\_CM009275.2:64744675-64749263\_HERVHF 3LTR 96.452 451 14 2  
1 451 5 453 0 735 100

Pongo\_abelii\_CM009271.2:100985548-100990741\_HERVHF 3LTR  
Pongo\_abelii\_CM009275.2:64744675-64749263\_HERVHF 5LTR 95.796 452 19 0  
1 452 1 452 0 730 100

Pongo\_abelii\_CM009277.2:80883698-80888716\_HERVHF 5LTR  
Pongo\_abelii\_CM009283.2:13770595-13775495\_HERVHF 3LTR 93.955 397 23 1  
27 422 1 397 5.66E-176605 92

Pongo\_abelii\_CM009277.2:80883698-80888716\_HERVHF 3LTR  
Pongo\_abelii\_CM009283.2:13770595-13775495\_HERVHF 5LTR 93.317 404 25 2  
23 424 1 404 2.38E-174600 95

Rhinopithecus\_roxellana\_CM017354.1:24650719-24659249\_HERVIPADP 3LTR  
Rhinopithecus\_roxellana\_CM017354.1:24740588-24749134\_HERVIPADP 3LTR 96.491  
399 14 0 1 399 1 399 0 657 99

Rhinopithecus\_roxellana\_CM017354.1:24650719-24659249\_HERVIPADP 5LTR  
Rhinopithecus\_roxellana\_CM017354.1:24740588-24749134\_HERVIPADP 5LTR 91.667  
396 33 0 1 396 1 396 5.61E-165566 100

Rhinopithecus\_roxellana\_CM017359.1:126642581-126647888\_HERVHF 3LTR  
Rhinopithecus\_roxellana\_CM017368.1:43723812-43728715\_HERVHF 3LTR 90.506 316  
27 3 1 314 44 358 4.24E-123425 100

Rhinopithecus\_roxellana\_CM017359.1:126642581-126647888\_HERVHF 5LTR  
Rhinopithecus\_roxellana\_CM017368.1:43723812-43728715\_HERVHF 5LTR 91.346 312  
22 4 1 309 46 355 3.43E-124428 99

**Supplementary data S8 The alignments of the 5LTR sequences of HERV in Figure 2B**

>Homo\_sapiens\_Y:4355841-4360781\_HERVHF:5LTR(-)

tcaggcctctgagccaagccaagccatcgcacccctgtcacttgacatatatgccagatggcctgaagtaactgaagaatcacaaaagaagtg  
aatatgccctgccccacctaactgatgacattccaccacaacagaagtataaatggctggctccttgcccttaagtgatgacattatcttgtaaagtccttt  
cctgctcatcatggctcaaaaagcacccccactgagcaccttgtagccccactcctgcccgccagagaacaacctcccttgactgtaattttcctt  
acctacccaaatcctataaaacggccccaccctatctcccttactgactctctttcggactcagcccacctgcaccaggtgaaataaacagcctc  
gttgctcacaaaagcctgtttggcgggtctcttcacatggatgcgcatgaa

>Homo\_sapiens\_X:90773760-90778707\_HERVHF:5LTR(-)

tcaggcctctgagccaagccaagccatcgcacccctgtgacttgcacggatacgaccagatggccggaagtaactgaaaaatcacaaaagaagt  
gaatatgccctgccccacctaactgatgacattccaccacaacagaagtataaatggctggctcttgcccttaagtgatgacattatcttgtaaagtcctt  
ttcctgctcatcatggctcaaaaagca-ccccactgagcaccttgtagccccactcctgcccgccagagaacaaccccccttgactgtaattttccta  
tacctacccaaatcctataaaacggccccaccctatcttcccttactga--ctctttcagactcagcccacctgcaccaggtgaaataaacagcctc  
gttgctcacaaaagcctgtttgggtggtctcttcacacggaagtgcata-

**Supplementary data S9 The alignments of the 3LTR sequences of HERV in Figure 2B**

>Homo\_sapiens\_X:90773760-90778707\_HERVHF:3LTR(-)

tcaggcctctgagccaagccaagccatcgcacccctgtcacttgcacgtatacaccagatggcctgaagtaactgaagaatcacaaaagaagtg  
aatacacctgccccacctaactgatgacattccaccacaaaagaagtgcaaattggccggtccttgcccttaagtgatgacattaccttgtaaagtctt  
ttcctggctcatcctggctcaaaaagcacccccactgagcaccttgcgacccccactcctgcccttcagagaacaacccccctttgactataatttcct  
ttacctaccaaatcctataaaacagccccaccctatctcccttcactgactctcttttggactcagcccgctgcacccaggtgaaataaacagcca  
tgttgctcacaaaagcctgtttgggtgtctcttcacacagatgcgcatg--

>Homo\_sapiens\_Y:4355841-4360781\_HERVHF:3LTR(-)

tcaggcctctgagccaagccaagccatcgcacccctgtcacttgcacgtatacaccagatggcctgaagtaactgaagaatcacaaaagaagtg  
aatacgccctgccct-cttaactgatgacattccaccacaaaagaagtgcaaacggccggtccttgcccttaactgatgacattaccttgtaaagtctt  
ttcctggctcatcctggctcaaaaagcacccccactgagcaccttgaacccccactcctgcccttcagagaacaacccccctttgactataatttcctt  
tacctaccaaatcctataaaacagccccaccctaactcccttcgctgactctcttttggactcagcccgctgcacccaggtgaaataaacagcca  
cgttgctcacaaaagcctgtttgggtgtctcttcacacggatgcgcatgaa

# Supplementary data S10 The relationship between HERVs in human genomes and Human

## ncRNA

| chr1 | S1       | E1       | HERVname                                     | O1 | chr2 | S2       | E2       | genename        | O2 | merged-length |
|------|----------|----------|----------------------------------------------|----|------|----------|----------|-----------------|----|---------------|
| 1    | 22997488 | 22997912 | Homo_sapiens_1_23000272-23002212-HERVHF-5LTR | -  | 1    | 22983561 | 23004042 | NONHSAG057580.1 | -  | 424           |
| 1    | 22997488 | 22997912 | Homo_sapiens_1_23000272-23002212-HERVHF-5LTR | -  | 1    | 22983561 | 23004042 | NONHSAT151253.1 | -  | 424           |
| 1    | 22998530 | 23001867 | Homo_sapiens_1_23000272-23002212-HERVHF-pol  | -  | 1    | 22983561 | 23004042 | NONHSAG057580.1 | -  | 3337          |
| 1    | 22998530 | 23001867 | Homo_sapiens_1_23000272-23002212-HERVHF-pol  | -  | 1    | 22983561 | 23004042 | NONHSAT151253.1 | -  | 3337          |
| 1    | 23002236 | 23002547 | Homo_sapiens_1_23000272-23002212-HERVHF-gag  | -  | 1    | 22983561 | 23004042 | NONHSAG057580.1 | -  | 311           |
| 1    | 23002236 | 23002547 | Homo_sapiens_1_23000272-23002212-HERVHF-gag  | -  | 1    | 22983561 | 23004042 | NONHSAT151253.1 | -  | 311           |
| 1    | 43085533 | 43091095 | Homo_sapiens_1_43087972-43089561-HERVHF      | +  | 1    | 43196506 | 43091095 | NONHSAG058967.2 | +  | 5562          |
| 1    | 43085533 | 43085862 | Homo_sapiens_1_43087972-43089561-HERVHF-5LTR | +  | 1    | 42958276 | 43196506 | NONHSAG058967.2 | +  | 329           |
| 1    | 43087974 | 43088405 | Homo_sapiens_1_43087972-43089561-HERVHF-pro  | +  | 1    | 42958276 | 43196506 | NONHSAG058967.2 | +  | 431           |
| 1    | 43088444 | 43090183 | Homo_sapiens_1_43087972-43089561-HERVHF-pol  | +  | 1    | 42958276 | 43196506 | NONHSAG058967.2 | +  | 1739          |
| 1    | 43090771 | 43091095 | Homo_sapiens_1_43087972-43089561-HERVHF-3LTR | +  | 1    | 42958276 | 43196506 | NONHSAG058967.2 | +  | 324           |
| 1    | 43085533 | 43091095 | Homo_sapiens_1_43087972-43089561-HERVHF      | +  | 1    | 43196506 | 43091095 | NONHSAT224980.1 | +  | 5562          |
| 1    | 43085533 | 43085862 | Homo_sapiens_1_43087972-43089561-HERVHF-5LTR | +  | 1    | 42959045 | 43196506 | NONHSAT224980.1 | +  | 329           |
| 1    | 43087974 | 43088405 | Homo_sapiens_1_43087972-43089561-HERVHF-pro  | +  | 1    | 42959045 | 43196506 | NONHSAT224980.1 | +  | 431           |
| 1    | 43088444 | 43090183 | Homo_sapiens_1_43087972-43089561-HERVHF-pol  | +  | 1    | 42959045 | 43196506 | NONHSAT224980.1 | +  | 1739          |
| 1    | 43090771 | 43091095 | Homo_sapiens_1_43087972-43089561-HERVHF-3LTR | +  | 1    | 42959045 | 43196506 | NONHSAT224980.1 | +  | 324           |
| 1    | 43087974 | 43088405 | Homo_sapiens_1_43087972-43089561-HERVHF-pro  | +  | 1    | 43087944 | 43092069 | NONHSAG056389.1 | +  | 431           |
| 1    | 43087974 | 43088405 | Homo_sapiens_1_43087972-43089561-HERVHF-pro  | +  | 1    | 43087944 | 43092069 | NONHSAT148830.1 | +  | 431           |
| 1    | 43088444 | 43090183 | Homo_sapiens_1_43087972-43089561-HERVHF-pol  | +  | 1    | 43087944 | 43092069 | NONHSAG056389.1 | +  | 1739          |
| 1    | 43088444 | 43090183 | Homo_sapiens_1_43087972-43089561-HERVHF-pol  | +  | 1    |          |          |                 |    |               |

43087944 43092069 NONHSAT148830.1 + 1739

1 43090771 43091095 Homo\_sapiens\_1\_43087972-43089561-HERVHF-3LTR + 1  
43087944 43092069 NONHSAG056389.1 + 324

1 43090771 43091095 Homo\_sapiens\_1\_43087972-43089561-HERVHF-3LTR + 1  
43087944 43092069 NONHSAT148830.1 + 324

1 68386003 68391994 Homo\_sapiens\_1\_68388791-68390135-HERVHF + 1 68385473  
68484266 NONHSAG001773.3 + 5991

1 68386003 68386439 Homo\_sapiens\_1\_68388791-68390135-HERVHF-5LTR + 1  
68385473 68484266 NONHSAG001773.3 + 436

1 68386003 68386439 Homo\_sapiens\_1\_68388791-68390135-HERVHF-5LTR + 1  
68385473 68391984 NONHSAT225125.1 + 436

1 68386003 68391994 Homo\_sapiens\_1\_68388791-68390135-HERVHF + 1 68385473  
68451507 NONHSAT225126.1 + 5991

1 68386003 68386439 Homo\_sapiens\_1\_68388791-68390135-HERVHF-5LTR + 1  
68385473 68451507 NONHSAT225126.1 + 436

1 68386003 68391994 Homo\_sapiens\_1\_68388791-68390135-HERVHF + 1 68385473  
68468517 NONHSAT225127.1 + 5991

1 68386003 68386439 Homo\_sapiens\_1\_68388791-68390135-HERVHF-5LTR + 1  
68385473 68468517 NONHSAT225127.1 + 436

1 68386003 68391994 Homo\_sapiens\_1\_68388791-68390135-HERVHF + 1 68385473  
68484266 NONHSAT225128.1 + 5991

1 68386003 68386439 Homo\_sapiens\_1\_68388791-68390135-HERVHF-5LTR + 1  
68385473 68484266 NONHSAT225128.1 + 436

1 68388421 68388741 Homo\_sapiens\_1\_68388791-68390135-HERVHF-gag + 1  
68385473 68484266 NONHSAG001773.3 + 320

1 68388421 68388741 Homo\_sapiens\_1\_68388791-68390135-HERVHF-gag + 1  
68385473 68391984 NONHSAT225125.1 + 320

1 68388421 68388741 Homo\_sapiens\_1\_68388791-68390135-HERVHF-gag + 1  
68385473 68451507 NONHSAT225126.1 + 320

1 68388421 68388741 Homo\_sapiens\_1\_68388791-68390135-HERVHF-gag + 1  
68385473 68468517 NONHSAT225127.1 + 320

1 68388421 68388741 Homo\_sapiens\_1\_68388791-68390135-HERVHF-gag + 1  
68385473 68484266 NONHSAT225128.1 + 320

1 68389169 68391111 Homo\_sapiens\_1\_68388791-68390135-HERVHF-pol + 1  
68385473 68484266 NONHSAG001773.3 + 1942

1 68389169 68391111 Homo\_sapiens\_1\_68388791-68390135-HERVHF-pol + 1  
68385473 68391984 NONHSAT225125.1 + 1942

1 68389169 68391111 Homo\_sapiens\_1\_68388791-68390135-HERVHF-pol + 1  
68385473 68451507 NONHSAT225126.1 + 1942

1 68389169 68391111 Homo\_sapiens\_1\_68388791-68390135-HERVHF-pol + 1  
68385473 68468517 NONHSAT225127.1 + 1942

1 68389169 68391111 Homo\_sapiens\_1\_68388791-68390135-HERVHF-pol + 1  
68385473 68484266 NONHSAT225128.1 + 1942

1 68391558 68391994 Homo\_sapiens\_1\_68388791-68390135-HERVHF-3LTR + 1

|   |                                                                |   |      |          |
|---|----------------------------------------------------------------|---|------|----------|
|   | 68385473 68484266 NONHSAG001773.3                              | + | 436  |          |
| 1 | 68391558 68391994 Homo_sapiens_1_68388791-68390135-HERVHF-3LTR | + | 1    |          |
|   | 68385473 68451507 NONHSAT225126.1                              | + | 436  |          |
| 1 | 68391558 68391994 Homo_sapiens_1_68388791-68390135-HERVHF-3LTR | + | 1    |          |
|   | 68385473 68468517 NONHSAT225127.1                              | + | 436  |          |
| 1 | 68391558 68391994 Homo_sapiens_1_68388791-68390135-HERVHF-3LTR | + | 1    |          |
|   | 68385473 68484266 NONHSAT225128.1                              | + | 436  |          |
| 1 | 82354581 82360561 Homo_sapiens_1_82356924-82357985-HERVHF      | - | 1    | 82212413 |
|   | 82848205 ENSG00000233290                                       | - | 5980 |          |
| 1 | 82354581 82354965 Homo_sapiens_1_82356924-82357985-HERVHF-5LTR | - | 1    |          |
|   | 82212413 82848205 ENSG00000233290                              | - | 384  |          |
| 1 | 82354581 82360561 Homo_sapiens_1_82356924-82357985-HERVHF      | - | 1    | 82212413 |
|   | 82814210 ENSG00000233290                                       | - | 5980 |          |
| 1 | 82354581 82354965 Homo_sapiens_1_82356924-82357985-HERVHF-5LTR | - | 1    |          |
|   | 82212413 82814210 ENSG00000233290                              | - | 384  |          |
| 1 | 82355816 82357821 Homo_sapiens_1_82356924-82357985-HERVHF-pol  | - | 1    |          |
|   | 82212413 82848205 ENSG00000233290                              | - | 2005 |          |
| 1 | 82355816 82357821 Homo_sapiens_1_82356924-82357985-HERVHF-pol  | - | 1    |          |
|   | 82212413 82814210 ENSG00000233290                              | - | 2005 |          |
| 1 | 82357279 82358037 Homo_sapiens_1_82356924-82357985-HERVHF-pro  | - | 1    |          |
|   | 82212413 82848205 ENSG00000233290                              | - | 758  |          |
| 1 | 82357279 82358037 Homo_sapiens_1_82356924-82357985-HERVHF-pro  | - | 1    |          |
|   | 82212413 82814210 ENSG00000233290                              | - | 758  |          |
| 1 | 82360176 82360561 Homo_sapiens_1_82356924-82357985-HERVHF-3LTR | - | 1    |          |
|   | 82212413 82848205 ENSG00000233290                              | - | 385  |          |
| 1 | 82360176 82360561 Homo_sapiens_1_82356924-82357985-HERVHF-3LTR | - | 1    |          |
|   | 82212413 82814210 ENSG00000233290                              | - | 385  |          |
| 1 | 82355816 82357821 Homo_sapiens_1_82356924-82357985-HERVHF-pol  | - | 1    |          |
|   | 82354967 82362589 NONHSAG001922.2                              | - | 2005 |          |
| 1 | 82355816 82357821 Homo_sapiens_1_82356924-82357985-HERVHF-pol  | - | 1    |          |
|   | 82354967 82362589 NONHSAT004141.2                              | - | 2005 |          |
| 1 | 82357279 82358037 Homo_sapiens_1_82356924-82357985-HERVHF-pro  | - | 1    |          |
|   | 82354967 82362589 NONHSAG001922.2                              | - | 758  |          |
| 1 | 82357279 82358037 Homo_sapiens_1_82356924-82357985-HERVHF-pro  | - | 1    |          |
|   | 82354967 82362589 NONHSAT004141.2                              | - | 758  |          |
| 1 | 82360176 82360561 Homo_sapiens_1_82356924-82357985-HERVHF-3LTR | - | 1    |          |
|   | 82354967 82362589 NONHSAG001922.2                              | - | 385  |          |
| 1 | 82360176 82360561 Homo_sapiens_1_82356924-82357985-HERVHF-3LTR | - | 1    |          |
|   | 82354967 82362589 NONHSAT004141.2                              | - | 385  |          |
| 1 | 82955299 82961592 Homo_sapiens_1_82956772-82959208-HERVHF      | + | 1    | 82903182 |
|   | 83180821 NONHSAG001926.2                                       | + | 6293 |          |
| 1 | 82955299 82955725 Homo_sapiens_1_82956772-82959208-HERVHF-5LTR | + | 1    |          |
|   | 82903182 83180821 NONHSAG001926.2                              | + | 426  |          |
| 1 | 82955299 82961592 Homo_sapiens_1_82956772-82959208-HERVHF      | + | 1    | 82903182 |

|   |                                                                |   |      |          |
|---|----------------------------------------------------------------|---|------|----------|
|   | 83166815 NONHSAT004147.2                                       | + | 6293 |          |
| 1 | 82955299 82955725 Homo_sapiens_1_82956772-82959208-HERVHF-5LTR | + | 1    |          |
|   | 82903182 83166815 NONHSAT004147.2                              | + | 426  |          |
| 1 | 82957379 82957759 Homo_sapiens_1_82956772-82959208-HERVHF-gag  | + | 1    |          |
|   | 82903182 83180821 NONHSAG001926.2                              | + | 380  |          |
| 1 | 82957379 82957759 Homo_sapiens_1_82956772-82959208-HERVHF-gag  | + | 1    |          |
|   | 82903182 83166815 NONHSAT004147.2                              | + | 380  |          |
| 1 | 82957868 82958632 Homo_sapiens_1_82956772-82959208-HERVHF-pro  | + | 1    |          |
|   | 82903182 83180821 NONHSAG001926.2                              | + | 764  |          |
| 1 | 82957868 82958632 Homo_sapiens_1_82956772-82959208-HERVHF-pro  | + | 1    |          |
|   | 82903182 83166815 NONHSAT004147.2                              | + | 764  |          |
| 1 | 82958120 82960341 Homo_sapiens_1_82956772-82959208-HERVHF-pol  | + | 1    |          |
|   | 82903182 83180821 NONHSAG001926.2                              | + | 2221 |          |
| 1 | 82958120 82960341 Homo_sapiens_1_82956772-82959208-HERVHF-pol  | + | 1    |          |
|   | 82903182 83166815 NONHSAT004147.2                              | + | 2221 |          |
| 1 | 82961176 82961592 Homo_sapiens_1_82956772-82959208-HERVHF-3LTR | + | 1    |          |
|   | 82903182 83180821 NONHSAG001926.2                              | + | 416  |          |
| 1 | 82961176 82961592 Homo_sapiens_1_82956772-82959208-HERVHF-3LTR | + | 1    |          |
|   | 82903182 83166815 NONHSAT004147.2                              | + | 416  |          |
| 1 | 82955299 82961592 Homo_sapiens_1_82956772-82959208-HERVHF      | + | 1    | 82903183 |
|   | 83166815 ENSG00000230817                                       | + | 6293 |          |
| 1 | 82955299 82955725 Homo_sapiens_1_82956772-82959208-HERVHF-5LTR | + | 1    |          |
|   | 82903183 83166815 ENSG00000230817                              | + | 426  |          |
| 1 | 82955299 82961592 Homo_sapiens_1_82956772-82959208-HERVHF      | + | 1    | 82903183 |
|   | 83180821 NONHSAT149257.1                                       | + | 6293 |          |
| 1 | 82955299 82955725 Homo_sapiens_1_82956772-82959208-HERVHF-5LTR | + | 1    |          |
|   | 82903183 83180821 NONHSAT149257.1                              | + | 426  |          |
| 1 | 82957379 82957759 Homo_sapiens_1_82956772-82959208-HERVHF-gag  | + | 1    |          |
|   | 82903183 83166815 ENSG00000230817                              | + | 380  |          |
| 1 | 82957379 82957759 Homo_sapiens_1_82956772-82959208-HERVHF-gag  | + | 1    |          |
|   | 82903183 83180821 NONHSAT149257.1                              | + | 380  |          |
| 1 | 82957868 82958632 Homo_sapiens_1_82956772-82959208-HERVHF-pro  | + | 1    |          |
|   | 82903183 83166815 ENSG00000230817                              | + | 764  |          |
| 1 | 82957868 82958632 Homo_sapiens_1_82956772-82959208-HERVHF-pro  | + | 1    |          |
|   | 82903183 83180821 NONHSAT149257.1                              | + | 764  |          |
| 1 | 82958120 82960341 Homo_sapiens_1_82956772-82959208-HERVHF-pol  | + | 1    |          |
|   | 82903183 83166815 ENSG00000230817                              | + | 2221 |          |
| 1 | 82958120 82960341 Homo_sapiens_1_82956772-82959208-HERVHF-pol  | + | 1    |          |
|   | 82903183 83180821 NONHSAT149257.1                              | + | 2221 |          |
| 1 | 82961176 82961592 Homo_sapiens_1_82956772-82959208-HERVHF-3LTR | + | 1    |          |
|   | 82903183 83166815 ENSG00000230817                              | + | 416  |          |
| 1 | 82961176 82961592 Homo_sapiens_1_82956772-82959208-HERVHF-3LTR | + | 1    |          |
|   | 82903183 83180821 NONHSAT149257.1                              | + | 416  |          |
| 1 | 82955299 82961592 Homo_sapiens_1_82956772-82959208-HERVHF      | + | 1    | 82903201 |

83097023 ENSG00000230817 + 6293

1 82955299 82955725 Homo\_sapiens\_1\_82956772-82959208-HERVHF-5LTR + 1  
82903201 83097023 ENSG00000230817 + 426

1 82957379 82957759 Homo\_sapiens\_1\_82956772-82959208-HERVHF-gag + 1  
82903201 83097023 ENSG00000230817 + 380

1 82957868 82958632 Homo\_sapiens\_1\_82956772-82959208-HERVHF-pro + 1  
82903201 83097023 ENSG00000230817 + 764

1 82958120 82960341 Homo\_sapiens\_1\_82956772-82959208-HERVHF-pol + 1  
82903201 83097023 ENSG00000230817 + 2221

1 82961176 82961592 Homo\_sapiens\_1\_82956772-82959208-HERVHF-3LTR + 1  
82903201 83097023 ENSG00000230817 + 416

1 82955299 82961592 Homo\_sapiens\_1\_82956772-82959208-HERVHF + 1 82903220  
83064102 ENSG00000230817 + 6293

1 82955299 82955725 Homo\_sapiens\_1\_82956772-82959208-HERVHF-5LTR + 1  
82903220 83064102 ENSG00000230817 + 426

1 82957379 82957759 Homo\_sapiens\_1\_82956772-82959208-HERVHF-gag + 1  
82903220 83064102 ENSG00000230817 + 380

1 82957868 82958632 Homo\_sapiens\_1\_82956772-82959208-HERVHF-pro + 1  
82903220 83064102 ENSG00000230817 + 764

1 82958120 82960341 Homo\_sapiens\_1\_82956772-82959208-HERVHF-pol + 1  
82903220 83064102 ENSG00000230817 + 2221

1 82961176 82961592 Homo\_sapiens\_1\_82956772-82959208-HERVHF-3LTR + 1  
82903220 83064102 ENSG00000230817 + 416

1 82955299 82961592 Homo\_sapiens\_1\_82956772-82959208-HERVHF + 1 82907560  
82997561 NONHSAT004148.2 + 6293

1 82955299 82955725 Homo\_sapiens\_1\_82956772-82959208-HERVHF-5LTR + 1  
82907560 82997561 NONHSAT004148.2 + 426

1 82957379 82957759 Homo\_sapiens\_1\_82956772-82959208-HERVHF-gag + 1  
82907560 82997561 NONHSAT004148.2 + 380

1 82957868 82958632 Homo\_sapiens\_1\_82956772-82959208-HERVHF-pro + 1  
82907560 82997561 NONHSAT004148.2 + 764

1 82958120 82960341 Homo\_sapiens\_1\_82956772-82959208-HERVHF-pol + 1  
82907560 82997561 NONHSAT004148.2 + 2221

1 82961176 82961592 Homo\_sapiens\_1\_82956772-82959208-HERVHF-3LTR + 1  
82907560 82997561 NONHSAT004148.2 + 416

1 82955299 82961592 Homo\_sapiens\_1\_82956772-82959208-HERVHF + 1 82907561  
82997561 NONHSAT004149.2 + 6293

1 82955299 82955725 Homo\_sapiens\_1\_82956772-82959208-HERVHF-5LTR + 1  
82907561 82997561 NONHSAT004149.2 + 426

1 82957379 82957759 Homo\_sapiens\_1\_82956772-82959208-HERVHF-gag + 1  
82907561 82997561 NONHSAT004149.2 + 380

1 82957868 82958632 Homo\_sapiens\_1\_82956772-82959208-HERVHF-pro + 1  
82907561 82997561 NONHSAT004149.2 + 764

1 82958120 82960341 Homo\_sapiens\_1\_82956772-82959208-HERVHF-pol + 1



|   |           |                 |                                                |                 |      |          |
|---|-----------|-----------------|------------------------------------------------|-----------------|------|----------|
|   | 82907561  | 82997561        | NONHSAT004149.2                                | +               | 2221 |          |
| 1 | 82961176  | 82961592        | Homo_sapiens_1_82956772-82959208-HERVHF-3LTR   | +               | 1    |          |
|   | 82907561  | 82997561        | NONHSAT004149.2                                | +               | 416  |          |
| 1 | 82955299  | 82961592        | Homo_sapiens_1_82956772-82959208-HERVHF        | +               | 1    | 82907562 |
|   | 82997561  | ENSG00000230817 | +                                              | 6293            |      |          |
| 1 | 82955299  | 82955725        | Homo_sapiens_1_82956772-82959208-HERVHF-5LTR   | +               | 1    |          |
|   | 82907562  | 82997561        | ENSG00000230817                                | +               | 426  |          |
| 1 | 82957379  | 82957759        | Homo_sapiens_1_82956772-82959208-HERVHF-gag    | +               | 1    |          |
|   | 82907562  | 82997561        | ENSG00000230817                                | +               | 380  |          |
| 1 | 82957868  | 82958632        | Homo_sapiens_1_82956772-82959208-HERVHF-pro    | +               | 1    |          |
|   | 82907562  | 82997561        | ENSG00000230817                                | +               | 764  |          |
| 1 | 82958120  | 82960341        | Homo_sapiens_1_82956772-82959208-HERVHF-pol    | +               | 1    |          |
|   | 82907562  | 82997561        | ENSG00000230817                                | +               | 2221 |          |
| 1 | 82961176  | 82961592        | Homo_sapiens_1_82956772-82959208-HERVHF-3LTR   | +               | 1    |          |
|   | 82907562  | 82997561        | ENSG00000230817                                | +               | 416  |          |
| 1 | 209451675 | 209453142       | Homo_sapiens_1_209451456-209452546-HERVHF-pol  | +               | 1    |          |
|   | 209449432 | 209499156       | NONHSAG057153.1                                | +               | 1467 |          |
| 1 | 209451675 | 209453142       | Homo_sapiens_1_209451456-209452546-HERVHF-pol  | +               | 1    |          |
|   | 209449432 | 209499156       | NONHSAT150429.1                                | +               | 1467 |          |
| 1 | 209453552 | 209454012       | Homo_sapiens_1_209451456-209452546-HERVHF-3LTR | +               |      |          |
|   | 1         | 209449432       | 209499156                                      | NONHSAG057153.1 | +    | 460      |
| 1 | 209453552 | 209454012       | Homo_sapiens_1_209451456-209452546-HERVHF-3LTR | +               |      |          |
|   | 1         | 209449432       | 209499156                                      | NONHSAT150429.1 | +    | 460      |
| 1 | 224840009 | 224846095       | Homo_sapiens_1_224842067-224843662-HERVHF      | -               | 1    |          |
|   | 224802959 | 224881355       | ENSG00000286719                                | -               | 6086 |          |
| 1 | 224840009 | 224840329       | Homo_sapiens_1_224842067-224843662-HERVHF-5LTR | -               |      |          |
|   | 1         | 224802959       | 224881355                                      | ENSG00000286719 | -    | 320      |
| 1 | 224841379 | 224843462       | Homo_sapiens_1_224842067-224843662-HERVHF-pol  | -               | 1    |          |
|   | 224802959 | 224881355       | ENSG00000286719                                | -               | 2083 |          |
| 1 | 224842881 | 224843657       | Homo_sapiens_1_224842067-224843662-HERVHF-pro  | -               | 1    |          |
|   | 224802959 | 224881355       | ENSG00000286719                                | -               | 776  |          |
| 1 | 224845764 | 224846095       | Homo_sapiens_1_224842067-224843662-HERVHF-3LTR | -               |      |          |
|   | 1         | 224802959       | 224881355                                      | ENSG00000286719 | -    | 331      |
| 1 | 228942542 | 228942868       | Homo_sapiens_1_228948757-228950104-HERVHF-5LTR | +               |      |          |
|   | 1         | 228941467       | 228945760                                      | NONHSAG057288.1 | +    | 326      |
| 1 | 228942542 | 228942868       | Homo_sapiens_1_228948757-228950104-HERVHF-5LTR | +               |      |          |
|   | 1         | 228941467       | 228945637                                      | NONHSAT150689.1 | +    | 326      |
| 1 | 228942542 | 228942868       | Homo_sapiens_1_228948757-228950104-HERVHF-5LTR | +               |      |          |
|   | 1         | 228941640       | 228945760                                      | NONHSAT150690.1 | +    | 326      |
| 1 | 232120241 | 232120654       | Homo_sapiens_1_232120704-232121847-HERVHF-gag  | +               | 1    |          |
|   | 232118508 | 232186796       | NONHSAG004630.2                                | +               | 413  |          |
| 1 | 232120241 | 232120654       | Homo_sapiens_1_232120704-232121847-HERVHF-gag  | +               | 1    |          |
|   | 232118508 | 232186796       | NONHSAT010200.2                                | +               | 413  |          |
| 1 | 232120661 | 232121512       | Homo_sapiens_1_232120704-232121847-HERVHF-pro  | +               | 1    |          |

|   |           |           |                                                |   |      |  |
|---|-----------|-----------|------------------------------------------------|---|------|--|
|   | 232118508 | 232186796 | NONHSAG004630.2                                | + | 851  |  |
| 1 | 232120661 | 232121512 | Homo_sapiens_1_232120704-232121847-HERVHF-pro  | + | 1    |  |
|   | 232118508 | 232186796 | NONHSAT010200.2                                | + | 851  |  |
| 1 | 232120994 | 232122891 | Homo_sapiens_1_232120704-232121847-HERVHF-pol  | + | 1    |  |
|   | 232118508 | 232186796 | NONHSAG004630.2                                | + | 1897 |  |
| 1 | 232120994 | 232122891 | Homo_sapiens_1_232120704-232121847-HERVHF-pol  | + | 1    |  |
|   | 232118508 | 232186796 | NONHSAT010200.2                                | + | 1897 |  |
| 1 | 232123477 | 232123943 | Homo_sapiens_1_232120704-232121847-HERVHF-3LTR | + |      |  |
| 1 | 232118508 | 232186796 | NONHSAG004630.2                                | + | 466  |  |
| 1 | 232123477 | 232123943 | Homo_sapiens_1_232120704-232121847-HERVHF-3LTR | + |      |  |
| 1 | 232118508 | 232186796 | NONHSAT010200.2                                | + | 466  |  |
| 1 | 241433890 | 241439885 | Homo_sapiens_1_241436435-241438237-HERVHF      | + | 1    |  |
|   | 241413716 | 241450482 | ENSG00000287516                                | + | 5995 |  |
| 1 | 241433890 | 241434298 | Homo_sapiens_1_241436435-241438237-HERVHF-5LTR | + |      |  |
| 1 | 241413716 | 241450482 | ENSG00000287516                                | + | 408  |  |
| 1 | 241436142 | 241436447 | Homo_sapiens_1_241436435-241438237-HERVHF-gag  | + | 1    |  |
|   | 241413716 | 241450482 | ENSG00000287516                                | + | 305  |  |
| 1 | 241436737 | 241439030 | Homo_sapiens_1_241436435-241438237-HERVHF-pol  | + | 1    |  |
|   | 241413716 | 241450482 | ENSG00000287516                                | + | 2293 |  |
| 1 | 241439482 | 241439885 | Homo_sapiens_1_241436435-241438237-HERVHF-3LTR | + |      |  |
| 1 | 241413716 | 241450482 | ENSG00000287516                                | + | 403  |  |
| 1 | 241433890 | 241439885 | Homo_sapiens_1_241436435-241438237-HERVHF      | + | 1    |  |
|   | 241413742 | 241450400 | ENSG00000287516                                | + | 5995 |  |
| 1 | 241433890 | 241434298 | Homo_sapiens_1_241436435-241438237-HERVHF-5LTR | + |      |  |
| 1 | 241413742 | 241450400 | ENSG00000287516                                | + | 408  |  |
| 1 | 241436142 | 241436447 | Homo_sapiens_1_241436435-241438237-HERVHF-gag  | + | 1    |  |
|   | 241413742 | 241450400 | ENSG00000287516                                | + | 305  |  |
| 1 | 241436737 | 241439030 | Homo_sapiens_1_241436435-241438237-HERVHF-pol  | + | 1    |  |
|   | 241413742 | 241450400 | ENSG00000287516                                | + | 2293 |  |
| 1 | 241439482 | 241439885 | Homo_sapiens_1_241436435-241438237-HERVHF-3LTR | + |      |  |
| 1 | 241413742 | 241450400 | ENSG00000287516                                | + | 403  |  |
| 1 | 241433890 | 241439885 | Homo_sapiens_1_241436435-241438237-HERVHF      | + | 1    |  |
|   | 241413750 | 241464542 | ENSG00000287516                                | + | 5995 |  |
| 1 | 241433890 | 241434298 | Homo_sapiens_1_241436435-241438237-HERVHF-5LTR | + |      |  |
| 1 | 241413750 | 241464542 | ENSG00000287516                                | + | 408  |  |
| 1 | 241433890 | 241439885 | Homo_sapiens_1_241436435-241438237-HERVHF      | + | 1    |  |
|   | 241413750 | 241464722 | ENSG00000287516                                | + | 5995 |  |
| 1 | 241433890 | 241434298 | Homo_sapiens_1_241436435-241438237-HERVHF-5LTR | + |      |  |
| 1 | 241413750 | 241464722 | ENSG00000287516                                | + | 408  |  |
| 1 | 241433890 | 241439885 | Homo_sapiens_1_241436435-241438237-HERVHF      | + | 1    |  |
|   | 241413750 | 241468661 | ENSG00000287516                                | + | 5995 |  |
| 1 | 241433890 | 241434298 | Homo_sapiens_1_241436435-241438237-HERVHF-5LTR | + |      |  |
| 1 | 241413750 | 241468661 | ENSG00000287516                                | + | 408  |  |
| 1 | 241433890 | 241439885 | Homo_sapiens_1_241436435-241438237-HERVHF      | + | 1    |  |

|   |             |           |                                                |   |
|---|-------------|-----------|------------------------------------------------|---|
|   | 241413750   | 241450415 | ENSG00000287516 + 5995                         |   |
| 1 | 241433890   | 241434298 | Homo_sapiens_1_241436435-241438237-HERVHF-5LTR | + |
|   | 1 241413750 | 241450415 | ENSG00000287516 + 408                          |   |
| 1 | 241436142   | 241436447 | Homo_sapiens_1_241436435-241438237-HERVHF-gag  | + |
|   | 241413750   | 241464542 | ENSG00000287516 + 305                          | 1 |
| 1 | 241436142   | 241436447 | Homo_sapiens_1_241436435-241438237-HERVHF-gag  | + |
|   | 241413750   | 241464722 | ENSG00000287516 + 305                          | 1 |
| 1 | 241436142   | 241436447 | Homo_sapiens_1_241436435-241438237-HERVHF-gag  | + |
|   | 241413750   | 241468661 | ENSG00000287516 + 305                          | 1 |
| 1 | 241436142   | 241436447 | Homo_sapiens_1_241436435-241438237-HERVHF-gag  | + |
|   | 241413750   | 241450415 | ENSG00000287516 + 305                          | 1 |
| 1 | 241436737   | 241439030 | Homo_sapiens_1_241436435-241438237-HERVHF-pol  | + |
|   | 241413750   | 241464542 | ENSG00000287516 + 2293                         | 1 |
| 1 | 241436737   | 241439030 | Homo_sapiens_1_241436435-241438237-HERVHF-pol  | + |
|   | 241413750   | 241464722 | ENSG00000287516 + 2293                         | 1 |
| 1 | 241436737   | 241439030 | Homo_sapiens_1_241436435-241438237-HERVHF-pol  | + |
|   | 241413750   | 241468661 | ENSG00000287516 + 2293                         | 1 |
| 1 | 241436737   | 241439030 | Homo_sapiens_1_241436435-241438237-HERVHF-pol  | + |
|   | 241413750   | 241450415 | ENSG00000287516 + 2293                         | 1 |
| 1 | 241439482   | 241439885 | Homo_sapiens_1_241436435-241438237-HERVHF-3LTR | + |
|   | 1 241413750 | 241464542 | ENSG00000287516 + 403                          |   |
| 1 | 241439482   | 241439885 | Homo_sapiens_1_241436435-241438237-HERVHF-3LTR | + |
|   | 1 241413750 | 241464722 | ENSG00000287516 + 403                          |   |
| 1 | 241439482   | 241439885 | Homo_sapiens_1_241436435-241438237-HERVHF-3LTR | + |
|   | 1 241413750 | 241468661 | ENSG00000287516 + 403                          |   |
| 1 | 241439482   | 241439885 | Homo_sapiens_1_241436435-241438237-HERVHF-3LTR | + |
|   | 1 241413750 | 241450415 | ENSG00000287516 + 403                          |   |
| 1 | 241433890   | 241439885 | Homo_sapiens_1_241436435-241438237-HERVHF      | + |
|   | 241413769   | 241458955 | ENSG00000287516 + 5995                         | 1 |
| 1 | 241433890   | 241434298 | Homo_sapiens_1_241436435-241438237-HERVHF-5LTR | + |
|   | 1 241413769 | 241458955 | ENSG00000287516 + 408                          |   |
| 1 | 241436142   | 241436447 | Homo_sapiens_1_241436435-241438237-HERVHF-gag  | + |
|   | 241413769   | 241458955 | ENSG00000287516 + 305                          | 1 |
| 1 | 241436737   | 241439030 | Homo_sapiens_1_241436435-241438237-HERVHF-pol  | + |
|   | 241413769   | 241458955 | ENSG00000287516 + 2293                         | 1 |
| 1 | 241439482   | 241439885 | Homo_sapiens_1_241436435-241438237-HERVHF-3LTR | + |
|   | 1 241413769 | 241458955 | ENSG00000287516 + 403                          |   |
| 1 | 241433890   | 241439885 | Homo_sapiens_1_241436435-241438237-HERVHF      | + |
|   | 241423795   | 241450400 | ENSG00000287516 + 5995                         | 1 |
| 1 | 241433890   | 241434298 | Homo_sapiens_1_241436435-241438237-HERVHF-5LTR | + |
|   | 1 241423795 | 241450400 | ENSG00000287516 + 408                          |   |
| 1 | 241436142   | 241436447 | Homo_sapiens_1_241436435-241438237-HERVHF-gag  | + |
|   | 241423795   | 241450400 | ENSG00000287516 + 305                          | 1 |
| 1 | 241436737   | 241439030 | Homo_sapiens_1_241436435-241438237-HERVHF-pol  | + |
|   |             |           |                                                | 1 |

|   |             |           |                                                |     |
|---|-------------|-----------|------------------------------------------------|-----|
|   | 241423795   | 241450400 | ENSG00000287516 + 2293                         |     |
| 1 | 241439482   | 241439885 | Homo_sapiens_1_241436435-241438237-HERVHF-3LTR | +   |
|   | 1 241423795 | 241450400 | ENSG00000287516 + 403                          |     |
| 1 | 241433890   | 241439885 | Homo_sapiens_1_241436435-241438237-HERVHF      | + 1 |
|   | 241424233   | 241450400 | ENSG00000287516 + 5995                         |     |
| 1 | 241433890   | 241434298 | Homo_sapiens_1_241436435-241438237-HERVHF-5LTR | +   |
|   | 1 241424233 | 241450400 | ENSG00000287516 + 408                          |     |
| 1 | 241436142   | 241436447 | Homo_sapiens_1_241436435-241438237-HERVHF-gag  | + 1 |
|   | 241424233   | 241450400 | ENSG00000287516 + 305                          |     |
| 1 | 241436737   | 241439030 | Homo_sapiens_1_241436435-241438237-HERVHF-pol  | + 1 |
|   | 241424233   | 241450400 | ENSG00000287516 + 2293                         |     |
| 1 | 241439482   | 241439885 | Homo_sapiens_1_241436435-241438237-HERVHF-3LTR | +   |
|   | 1 241424233 | 241450400 | ENSG00000287516 + 403                          |     |
| 1 | 241433890   | 241439885 | Homo_sapiens_1_241436435-241438237-HERVHF      | + 1 |
|   | 241424415   | 241450400 | ENSG00000287516 + 5995                         |     |
| 1 | 241433890   | 241434298 | Homo_sapiens_1_241436435-241438237-HERVHF-5LTR | +   |
|   | 1 241424415 | 241450400 | ENSG00000287516 + 408                          |     |
| 1 | 241436142   | 241436447 | Homo_sapiens_1_241436435-241438237-HERVHF-gag  | + 1 |
|   | 241424415   | 241450400 | ENSG00000287516 + 305                          |     |
| 1 | 241436737   | 241439030 | Homo_sapiens_1_241436435-241438237-HERVHF-pol  | + 1 |
|   | 241424415   | 241450400 | ENSG00000287516 + 2293                         |     |
| 1 | 241439482   | 241439885 | Homo_sapiens_1_241436435-241438237-HERVHF-3LTR | +   |
|   | 1 241424415 | 241450400 | ENSG00000287516 + 403                          |     |
| 1 | 241433890   | 241439885 | Homo_sapiens_1_241436435-241438237-HERVHF      | + 1 |
|   | 241424421   | 241450400 | NONHSAG115278.1 + 5995                         |     |
| 1 | 241433890   | 241434298 | Homo_sapiens_1_241436435-241438237-HERVHF-5LTR | +   |
|   | 1 241424421 | 241450400 | NONHSAG115278.1 + 408                          |     |
| 1 | 241436142   | 241436447 | Homo_sapiens_1_241436435-241438237-HERVHF-gag  | + 1 |
|   | 241424421   | 241450400 | NONHSAG115278.1 + 305                          |     |
| 1 | 241436737   | 241439030 | Homo_sapiens_1_241436435-241438237-HERVHF-pol  | + 1 |
|   | 241424421   | 241450400 | NONHSAG115278.1 + 2293                         |     |
| 1 | 241439482   | 241439885 | Homo_sapiens_1_241436435-241438237-HERVHF-3LTR | +   |
|   | 1 241424421 | 241450400 | NONHSAG115278.1 + 403                          |     |
| 1 | 241433890   | 241439885 | Homo_sapiens_1_241436435-241438237-HERVHF      | + 1 |
|   | 241424422   | 241450400 | ENSG00000287516 + 5995                         |     |
| 1 | 241433890   | 241434298 | Homo_sapiens_1_241436435-241438237-HERVHF-5LTR | +   |
|   | 1 241424422 | 241450400 | ENSG00000287516 + 408                          |     |
| 1 | 241436142   | 241436447 | Homo_sapiens_1_241436435-241438237-HERVHF-gag  | + 1 |
|   | 241424422   | 241450400 | ENSG00000287516 + 305                          |     |
| 1 | 241436737   | 241439030 | Homo_sapiens_1_241436435-241438237-HERVHF-pol  | + 1 |
|   | 241424422   | 241450400 | ENSG00000287516 + 2293                         |     |
| 1 | 241439482   | 241439885 | Homo_sapiens_1_241436435-241438237-HERVHF-3LTR | +   |
|   | 1 241424422 | 241450400 | ENSG00000287516 + 403                          |     |
| 1 | 241433890   | 241439885 | Homo_sapiens_1_241436435-241438237-HERVHF      | + 1 |

|   |           |                 |                                                |                   |      |          |
|---|-----------|-----------------|------------------------------------------------|-------------------|------|----------|
|   | 241424731 | 241450593       | ENSG00000287516 +                              | 5995              |      |          |
| 1 | 241433890 | 241434298       | Homo_sapiens_1_241436435-241438237-HERVHF-5LTR | +                 |      |          |
|   | 1         | 241424731       | 241450593                                      | ENSG00000287516 + | 408  |          |
| 1 | 241436142 | 241436447       | Homo_sapiens_1_241436435-241438237-HERVHF-gag  | +                 | 1    |          |
|   | 241424731 | 241450593       | ENSG00000287516 +                              | 305               |      |          |
| 1 | 241436737 | 241439030       | Homo_sapiens_1_241436435-241438237-HERVHF-pol  | +                 | 1    |          |
|   | 241424731 | 241450593       | ENSG00000287516 +                              | 2293              |      |          |
| 1 | 241439482 | 241439885       | Homo_sapiens_1_241436435-241438237-HERVHF-3LTR | +                 |      |          |
|   | 1         | 241424731       | 241450593                                      | ENSG00000287516 + | 403  |          |
| 1 | 241433890 | 241439885       | Homo_sapiens_1_241436435-241438237-HERVHF      | +                 | 1    |          |
|   | 241433492 | 241450400       | NONHSAT259099.1                                | +                 | 5995 |          |
| 1 | 241433890 | 241434298       | Homo_sapiens_1_241436435-241438237-HERVHF-5LTR | +                 |      |          |
|   | 1         | 241433492       | 241450400                                      | NONHSAT259099.1   | +    | 408      |
| 1 | 241436142 | 241436447       | Homo_sapiens_1_241436435-241438237-HERVHF-gag  | +                 | 1    |          |
|   | 241433492 | 241450400       | NONHSAT259099.1                                | +                 | 305  |          |
| 1 | 241436737 | 241439030       | Homo_sapiens_1_241436435-241438237-HERVHF-pol  | +                 | 1    |          |
|   | 241433492 | 241450400       | NONHSAT259099.1                                | +                 | 2293 |          |
| 1 | 241439482 | 241439885       | Homo_sapiens_1_241436435-241438237-HERVHF-3LTR | +                 |      |          |
|   | 1         | 241433492       | 241450400                                      | NONHSAT259099.1   | +    | 403      |
| 2 | 5000768   | 5001218         | Homo_sapiens_2_5003505-5005037-HERVHF-5LTR     | +                 | 2    | 4993143  |
|   | 5003638   | NONHSAG077068.1 | +                                              | 450               |      |          |
| 2 | 5000768   | 5001218         | Homo_sapiens_2_5003505-5005037-HERVHF-5LTR     | +                 | 2    | 4993143  |
|   | 5003638   | NONHSAT181175.1 | +                                              | 450               |      |          |
| 2 | 5003044   | 5003355         | Homo_sapiens_2_5003505-5005037-HERVHF-gag      | +                 | 2    | 4993143  |
|   | 5003638   | NONHSAG077068.1 | +                                              | 311               |      |          |
| 2 | 5003044   | 5003355         | Homo_sapiens_2_5003505-5005037-HERVHF-gag      | +                 | 2    | 4993143  |
|   | 5003638   | NONHSAT181175.1 | +                                              | 311               |      |          |
| 2 | 16791950  | 16797713        | Homo_sapiens_2_16793801-16795145-HERVHF        | -                 | 2    | 16791979 |
|   | 16797455  | NONHSAG078497.1 | -                                              | 5476              |      |          |
| 2 | 16791950  | 16797713        | Homo_sapiens_2_16793801-16795145-HERVHF        | -                 | 2    | 16791979 |
|   | 16797455  | NONHSAT184285.1 | -                                              | 5476              |      |          |
| 2 | 16792786  | 16794855        | Homo_sapiens_2_16793801-16795145-HERVHF-pol    | -                 | 2    |          |
|   | 16791979  | 16797455        | NONHSAG078497.1                                | -                 | 2069 |          |
| 2 | 16792786  | 16794855        | Homo_sapiens_2_16793801-16795145-HERVHF-pol    | -                 | 2    |          |
|   | 16791979  | 16797455        | NONHSAT184285.1                                | -                 | 2069 |          |
| 2 | 16794364  | 16795194        | Homo_sapiens_2_16793801-16795145-HERVHF-pro    | -                 | 2    |          |
|   | 16791979  | 16797455        | NONHSAG078497.1                                | -                 | 830  |          |
| 2 | 16794364  | 16795194        | Homo_sapiens_2_16793801-16795145-HERVHF-pro    | -                 | 2    |          |
|   | 16791979  | 16797455        | NONHSAT184285.1                                | -                 | 830  |          |
| 2 | 16795201  | 16795527        | Homo_sapiens_2_16793801-16795145-HERVHF-gag    | -                 | 2    |          |
|   | 16791979  | 16797455        | NONHSAG078497.1                                | -                 | 326  |          |
| 2 | 16795201  | 16795527        | Homo_sapiens_2_16793801-16795145-HERVHF-gag    | -                 | 2    |          |
|   | 16791979  | 16797455        | NONHSAT184285.1                                | -                 | 326  |          |
| 2 | 34789818  | 34796058        | Homo_sapiens_2_34792231-34793755-HERVHF        | +                 | 2    | 34653353 |

35016615 NONHSAG077257.1 + 6240  
 2 34789818 34790229 Homo\_sapiens\_2\_34792231-34793755-HERVHF-5LTR + 2  
 34653353 35016615 NONHSAG077257.1 + 411  
 2 34789818 34796058 Homo\_sapiens\_2\_34792231-34793755-HERVHF + 2 34653353  
 35016615 NONHSAT181538.1 + 6240  
 2 34789818 34790229 Homo\_sapiens\_2\_34792231-34793755-HERVHF-5LTR + 2  
 34653353 35016615 NONHSAT181538.1 + 411  
 2 34791769 34792152 Homo\_sapiens\_2\_34792231-34793755-HERVHF-gag + 2  
 34653353 35016615 NONHSAG077257.1 + 383  
 2 34791769 34792152 Homo\_sapiens\_2\_34792231-34793755-HERVHF-gag + 2  
 34653353 35016615 NONHSAT181538.1 + 383  
 2 34792609 34793756 Homo\_sapiens\_2\_34792231-34793755-HERVHF-pol + 2  
 34653353 35016615 NONHSAG077257.1 + 1147  
 2 34792609 34793756 Homo\_sapiens\_2\_34792231-34793755-HERVHF-pol + 2  
 34653353 35016615 NONHSAT181538.1 + 1147  
 2 34794693 34795526 Homo\_sapiens\_2\_34792231-34793755-HERVHF-env + 2  
 34653353 35016615 NONHSAG077257.1 + 833  
 2 34794693 34795526 Homo\_sapiens\_2\_34792231-34793755-HERVHF-env + 2  
 34653353 35016615 NONHSAT181538.1 + 833  
 2 34795641 34796058 Homo\_sapiens\_2\_34792231-34793755-HERVHF-3LTR + 2  
 34653353 35016615 NONHSAG077257.1 + 417  
 2 34795641 34796058 Homo\_sapiens\_2\_34792231-34793755-HERVHF-3LTR + 2  
 34653353 35016615 NONHSAT181538.1 + 417  
 2 38080800 38086513 Homo\_sapiens\_2\_38082627-38083973-HERVHF - 2 38070066  
 38109902 ENSG00000138061 - 5713  
 2 38080800 38081210 Homo\_sapiens\_2\_38082627-38083973-HERVHF-5LTR - 2  
 38070066 38109902 ENSG00000138061 - 410  
 2 38081220 38081575 Homo\_sapiens\_2\_38082627-38083973-HERVHF-env - 2  
 38070066 38109902 ENSG00000138061 - 355  
 2 38081793 38083597 Homo\_sapiens\_2\_38082627-38083973-HERVHF-pol - 2  
 38070066 38109902 ENSG00000138061 - 1804  
 2 38083220 38083771 Homo\_sapiens\_2\_38082627-38083973-HERVHF-pro - 2  
 38070066 38109902 ENSG00000138061 - 551  
 2 38086112 38086513 Homo\_sapiens\_2\_38082627-38083973-HERVHF-3LTR - 2  
 38070066 38109902 ENSG00000138061 - 401  
 2 67333734 67334075 Homo\_sapiens\_2\_67334137-67335887-HERVHF-gag + 2  
 67331882 67345739 NONHSAG028042.3 + 341  
 2 67333734 67334075 Homo\_sapiens\_2\_67334137-67335887-HERVHF-gag + 2  
 67331882 67337638 NONHSAT240668.1 + 341  
 2 67333734 67334075 Homo\_sapiens\_2\_67334137-67335887-HERVHF-gag + 2  
 67331882 67341136 NONHSAT240669.1 + 341  
 2 67334330 67335070 Homo\_sapiens\_2\_67334137-67335887-HERVHF-pro + 2  
 67331882 67345739 NONHSAG028042.3 + 740  
 2 67334330 67335070 Homo\_sapiens\_2\_67334137-67335887-HERVHF-pro + 2

|   |                                                                |   |      |          |
|---|----------------------------------------------------------------|---|------|----------|
|   | 67331882 67337638 NONHSAT240668.1                              | + | 740  |          |
| 2 | 67334330 67335070 Homo_sapiens_2_67334137-67335887-HERVHF-pro  | + | 2    |          |
|   | 67331882 67341136 NONHSAT240669.1                              | + | 740  |          |
| 2 | 67334504 67336274 Homo_sapiens_2_67334137-67335887-HERVHF-pol  | + | 2    |          |
|   | 67331882 67345739 NONHSAG028042.3                              | + | 1770 |          |
| 2 | 67334504 67336274 Homo_sapiens_2_67334137-67335887-HERVHF-pol  | + | 2    |          |
|   | 67331882 67337638 NONHSAT240668.1                              | + | 1770 |          |
| 2 | 67334504 67336274 Homo_sapiens_2_67334137-67335887-HERVHF-pol  | + | 2    |          |
|   | 67331882 67341136 NONHSAT240669.1                              | + | 1770 |          |
| 2 | 67337203 67337603 Homo_sapiens_2_67334137-67335887-HERVHF-3LTR | + | 2    |          |
|   | 67331882 67345739 NONHSAG028042.3                              | + | 400  |          |
| 2 | 67337203 67337603 Homo_sapiens_2_67334137-67335887-HERVHF-3LTR | + | 2    |          |
|   | 67331882 67337638 NONHSAT240668.1                              | + | 400  |          |
| 2 | 67337203 67337603 Homo_sapiens_2_67334137-67335887-HERVHF-3LTR | + | 2    |          |
|   | 67331882 67341136 NONHSAT240669.1                              | + | 400  |          |
| 2 | 67334330 67335070 Homo_sapiens_2_67334137-67335887-HERVHF-pro  | + | 2    |          |
|   | 67334004 67340821 NONHSAT071280.2                              | + | 740  |          |
| 2 | 67334504 67336274 Homo_sapiens_2_67334137-67335887-HERVHF-pol  | + | 2    |          |
|   | 67334004 67340821 NONHSAT071280.2                              | + | 1770 |          |
| 2 | 67337203 67337603 Homo_sapiens_2_67334137-67335887-HERVHF-3LTR | + | 2    |          |
|   | 67334004 67340821 NONHSAT071280.2                              | + | 400  |          |
| 2 | 67334330 67335070 Homo_sapiens_2_67334137-67335887-HERVHF-pro  | + | 2    |          |
|   | 67334007 67345739 NONHSAT181958.1                              | + | 740  |          |
| 2 | 67334504 67336274 Homo_sapiens_2_67334137-67335887-HERVHF-pol  | + | 2    |          |
|   | 67334007 67345739 NONHSAT181958.1                              | + | 1770 |          |
| 2 | 67337203 67337603 Homo_sapiens_2_67334137-67335887-HERVHF-3LTR | + | 2    |          |
|   | 67334007 67345739 NONHSAT181958.1                              | + | 400  |          |
| 2 | 69789900 69790233 Homo_sapiens_2_69792965-69796021-HUERSP-5LTR | - | 2    |          |
|   | 69789551 69798948 NONHSAG028084.2                              | - | 333  |          |
| 2 | 69789900 69790233 Homo_sapiens_2_69792965-69796021-HUERSP-5LTR | - | 2    |          |
|   | 69789551 69798948 NONHSAT071358.2                              | - | 333  |          |
| 2 | 69794775 69795859 Homo_sapiens_2_69792965-69796021-HUERSP-pol  | - | 2    |          |
|   | 69789551 69798948 NONHSAG028084.2                              | - | 1084 |          |
| 2 | 69794775 69795859 Homo_sapiens_2_69792965-69796021-HUERSP-pol  | - | 2    |          |
|   | 69789551 69798948 NONHSAT071358.2                              | - | 1084 |          |
| 2 | 69795440 69795853 Homo_sapiens_2_69792965-69796021-HUERSP-pro  | - | 2    |          |
|   | 69789551 69798948 NONHSAG028084.2                              | - | 413  |          |
| 2 | 69795440 69795853 Homo_sapiens_2_69792965-69796021-HUERSP-pro  | - | 2    |          |
|   | 69789551 69798948 NONHSAT071358.2                              | - | 413  |          |
| 2 | 77965137 77970868 Homo_sapiens_2_77967627-77968976-HERVHF      | + | 2    | 77942237 |
|   | 77981314 NONHSAG077496.1                                       | + | 5731 |          |
| 2 | 77965137 77965570 Homo_sapiens_2_77967627-77968976-HERVHF-5LTR | + | 2    |          |
|   | 77942237 77981314 NONHSAG077496.1                              | + | 433  |          |
| 2 | 77965137 77970868 Homo_sapiens_2_77967627-77968976-HERVHF      | + | 2    | 77942237 |

77981314 NONHSAT182071.1 + 5731  
 2 77965137 77965570 Homo\_sapiens\_2\_77967627-77968976-HERVHF-5LTR + 2  
 77942237 77981314 NONHSAT182071.1 + 433  
 2 77967584 77968414 Homo\_sapiens\_2\_77967627-77968976-HERVHF-pro + 2  
 77942237 77981314 NONHSAG077496.1 + 830  
 2 77967584 77968414 Homo\_sapiens\_2\_77967627-77968976-HERVHF-pro + 2  
 77942237 77981314 NONHSAT182071.1 + 830  
 2 77967872 77970012 Homo\_sapiens\_2\_77967627-77968976-HERVHF-pol + 2  
 77942237 77981314 NONHSAG077496.1 + 2140  
 2 77967872 77970012 Homo\_sapiens\_2\_77967627-77968976-HERVHF-pol + 2  
 77942237 77981314 NONHSAT182071.1 + 2140  
 2 77970418 77970868 Homo\_sapiens\_2\_77967627-77968976-HERVHF-3LTR + 2  
 77942237 77981314 NONHSAG077496.1 + 450  
 2 77970418 77970868 Homo\_sapiens\_2\_77967627-77968976-HERVHF-3LTR + 2  
 77942237 77981314 NONHSAT182071.1 + 450  
 2 192506078 192513184 Homo\_sapiens\_2\_192509946-192511342-HERVHF+ 2  
 192396591 192546131 NONHSAG030125.2 + 7106  
 2 192506078 192506492 Homo\_sapiens\_2\_192509946-192511342-HERVHF-5LTR +  
 2 192396591 192546131 NONHSAG030125.2 + 414  
 2 192506078 192513184 Homo\_sapiens\_2\_192509946-192511342-HERVHF+ 2  
 192396591 192546131 NONHSAT183345.1 + 7106  
 2 192506078 192506492 Homo\_sapiens\_2\_192509946-192511342-HERVHF-5LTR +  
 2 192396591 192546131 NONHSAT183345.1 + 414  
 2 192507423 192509865 Homo\_sapiens\_2\_192509946-192511342-HERVHF-gag + 2  
 192396591 192546131 NONHSAG030125.2 + 2442  
 2 192507423 192509865 Homo\_sapiens\_2\_192509946-192511342-HERVHF-gag + 2  
 192396591 192546131 NONHSAT183345.1 + 2442  
 2 192510149 192510781 Homo\_sapiens\_2\_192509946-192511342-HERVHF-pro + 2  
 192396591 192546131 NONHSAG030125.2 + 632  
 2 192510149 192510781 Homo\_sapiens\_2\_192509946-192511342-HERVHF-pro + 2  
 192396591 192546131 NONHSAT183345.1 + 632  
 2 192510377 192512317 Homo\_sapiens\_2\_192509946-192511342-HERVHF-pol + 2  
 192396591 192546131 NONHSAG030125.2 + 1940  
 2 192510377 192512317 Homo\_sapiens\_2\_192509946-192511342-HERVHF-pol + 2  
 192396591 192546131 NONHSAT183345.1 + 1940  
 2 192512768 192513184 Homo\_sapiens\_2\_192509946-192511342-HERVHF-3LTR +  
 2 192396591 192546131 NONHSAG030125.2 + 416  
 2 192512768 192513184 Homo\_sapiens\_2\_192509946-192511342-HERVHF-3LTR +  
 2 192396591 192546131 NONHSAT183345.1 + 416  
 2 192506078 192506492 Homo\_sapiens\_2\_192509946-192511342-HERVHF-5LTR +  
 2 192500447 192506865 NONHSAG078059.1 + 414  
 2 192506078 192506492 Homo\_sapiens\_2\_192509946-192511342-HERVHF-5LTR +  
 2 192500447 192506865 NONHSAT183346.1 + 414  
 2 215922303 215928129 Homo\_sapiens\_2\_215924899-215926434-HERVHF + 2



|   |           |           |                                                |   |      |  |
|---|-----------|-----------|------------------------------------------------|---|------|--|
|   | 215922571 | 215924919 | NONHSAG078151.1                                | + | 2348 |  |
| 2 | 215922303 | 215928129 | Homo_sapiens_2_215924899-215926434-HERVHF      | + | 2    |  |
|   | 215922571 | 215924919 | NONHSAT183525.1                                | + | 2348 |  |
| 2 | 215924520 | 215924849 | Homo_sapiens_2_215924899-215926434-HERVHF-gag  | + | 2    |  |
|   | 215922571 | 215924919 | NONHSAG078151.1                                | + | 329  |  |
| 2 | 215924520 | 215924849 | Homo_sapiens_2_215924899-215926434-HERVHF-gag  | + | 2    |  |
|   | 215922571 | 215924919 | NONHSAT183525.1                                | + | 329  |  |
| 2 | 224225331 | 224230988 | Homo_sapiens_2_224227814-224229160-HERVHF      | + | 2    |  |
|   | 224221224 | 224250090 | NONHSAG078214.1                                | + | 5657 |  |
| 2 | 224225331 | 224225730 | Homo_sapiens_2_224227814-224229160-HERVHF-5LTR | + |      |  |
| 2 | 224221224 | 224250090 | NONHSAG078214.1                                | + | 399  |  |
| 2 | 224225331 | 224230988 | Homo_sapiens_2_224227814-224229160-HERVHF      | + | 2    |  |
|   | 224221224 | 224250090 | NONHSAT183659.1                                | + | 5657 |  |
| 2 | 224225331 | 224225730 | Homo_sapiens_2_224227814-224229160-HERVHF-5LTR | + |      |  |
| 2 | 224221224 | 224250090 | NONHSAT183659.1                                | + | 399  |  |
| 2 | 224228022 | 224228600 | Homo_sapiens_2_224227814-224229160-HERVHF-pro  | + | 2    |  |
|   | 224221224 | 224250090 | NONHSAG078214.1                                | + | 578  |  |
| 2 | 224228022 | 224228600 | Homo_sapiens_2_224227814-224229160-HERVHF-pro  | + | 2    |  |
|   | 224221224 | 224250090 | NONHSAT183659.1                                | + | 578  |  |
| 2 | 224228193 | 224229742 | Homo_sapiens_2_224227814-224229160-HERVHF-pol  | + | 2    |  |
|   | 224221224 | 224250090 | NONHSAG078214.1                                | + | 1549 |  |
| 2 | 224228193 | 224229742 | Homo_sapiens_2_224227814-224229160-HERVHF-pol  | + | 2    |  |
|   | 224221224 | 224250090 | NONHSAT183659.1                                | + | 1549 |  |
| 2 | 224230587 | 224230988 | Homo_sapiens_2_224227814-224229160-HERVHF-3LTR | + |      |  |
| 2 | 224221224 | 224250090 | NONHSAG078214.1                                | + | 401  |  |
| 2 | 224230587 | 224230988 | Homo_sapiens_2_224227814-224229160-HERVHF-3LTR | + |      |  |
| 2 | 224221224 | 224250090 | NONHSAT183659.1                                | + | 401  |  |
| 2 | 237606784 | 237607197 | Homo_sapiens_2_237609479-237610820-HERVHF-5LTR | + |      |  |
| 2 | 237603880 | 237612508 | NONHSAG110040.1                                | + | 413  |  |
| 2 | 237606784 | 237607197 | Homo_sapiens_2_237609479-237610820-HERVHF-5LTR | + |      |  |
| 2 | 237603880 | 237607390 | NONHSAT241581.1                                | + | 413  |  |
| 2 | 237606784 | 237607197 | Homo_sapiens_2_237609479-237610820-HERVHF-5LTR | + |      |  |
| 2 | 237603880 | 237612508 | NONHSAT241582.1                                | + | 413  |  |
| 2 | 237609020 | 237609400 | Homo_sapiens_2_237609479-237610820-HERVHF-gag  | + | 2    |  |
|   | 237603880 | 237612508 | NONHSAG110040.1                                | + | 380  |  |
| 2 | 237609020 | 237609400 | Homo_sapiens_2_237609479-237610820-HERVHF-gag  | + | 2    |  |
|   | 237603880 | 237612508 | NONHSAT241582.1                                | + | 380  |  |
| 2 | 237609517 | 237610233 | Homo_sapiens_2_237609479-237610820-HERVHF-pro  | + | 2    |  |
|   | 237603880 | 237612508 | NONHSAG110040.1                                | + | 716  |  |
| 2 | 237609517 | 237610233 | Homo_sapiens_2_237609479-237610820-HERVHF-pro  | + | 2    |  |
|   | 237603880 | 237612508 | NONHSAT241582.1                                | + | 716  |  |
| 2 | 237609622 | 237611630 | Homo_sapiens_2_237609479-237610820-HERVHF-pol  | + | 2    |  |
|   | 237603880 | 237612508 | NONHSAG110040.1                                | + | 2008 |  |
| 2 | 237609622 | 237611630 | Homo_sapiens_2_237609479-237610820-HERVHF-pol  | + | 2    |  |

237603880 237612508 NONHSAT241582.1 + 2008

3 21189031 21194139 Homo\_sapiens\_3\_21190643-21192440-HERVHF - 3 21006729  
21226305 NONHSAG085388.2 - 5108

3 21189031 21189353 Homo\_sapiens\_3\_21190643-21192440-HERVHF-5LTR - 3  
21006729 21226305 NONHSAG085388.2 - 322

3 21189031 21194139 Homo\_sapiens\_3\_21190643-21192440-HERVHF - 3 21006729  
21226305 NONHSAT246351.1 - 5108

3 21189031 21189353 Homo\_sapiens\_3\_21190643-21192440-HERVHF-5LTR - 3  
21006729 21226305 NONHSAT246351.1 - 322

3 21189872 21191978 Homo\_sapiens\_3\_21190643-21192440-HERVHF-pol - 3  
21006729 21226305 NONHSAG085388.2 - 2106

3 21189872 21191978 Homo\_sapiens\_3\_21190643-21192440-HERVHF-pol - 3  
21006729 21226305 NONHSAT246351.1 - 2106

3 21192518 21192895 Homo\_sapiens\_3\_21190643-21192440-HERVHF-gag - 3  
21006729 21226305 NONHSAG085388.2 - 377

3 21192518 21192895 Homo\_sapiens\_3\_21190643-21192440-HERVHF-gag - 3  
21006729 21226305 NONHSAT246351.1 - 377

3 21193803 21194139 Homo\_sapiens\_3\_21190643-21192440-HERVHF-3LTR - 3  
21006729 21226305 NONHSAG085388.2 - 336

3 21193803 21194139 Homo\_sapiens\_3\_21190643-21192440-HERVHF-3LTR - 3  
21006729 21226305 NONHSAT246351.1 - 336

3 21189031 21194139 Homo\_sapiens\_3\_21190643-21192440-HERVHF - 3 21006730  
21226305 ENSG00000282987 - 5108

3 21189031 21189353 Homo\_sapiens\_3\_21190643-21192440-HERVHF-5LTR - 3  
21006730 21226305 ENSG00000282987 - 322

3 21189872 21191978 Homo\_sapiens\_3\_21190643-21192440-HERVHF-pol - 3  
21006730 21226305 ENSG00000282987 - 2106

3 21192518 21192895 Homo\_sapiens\_3\_21190643-21192440-HERVHF-gag - 3  
21006730 21226305 ENSG00000282987 - 377

3 21193803 21194139 Homo\_sapiens\_3\_21190643-21192440-HERVHF-3LTR - 3  
21006730 21226305 ENSG00000282987 - 336

3 21189031 21194139 Homo\_sapiens\_3\_21190643-21192440-HERVHF - 3 21171015  
21224899 NONHSAT195484.1 - 5108

3 21189031 21189353 Homo\_sapiens\_3\_21190643-21192440-HERVHF-5LTR - 3  
21171015 21224899 NONHSAT195484.1 - 322

3 21189872 21191978 Homo\_sapiens\_3\_21190643-21192440-HERVHF-pol - 3  
21171015 21224899 NONHSAT195484.1 - 2106

3 21192518 21192895 Homo\_sapiens\_3\_21190643-21192440-HERVHF-gag - 3  
21171015 21224899 NONHSAT195484.1 - 377

3 21193803 21194139 Homo\_sapiens\_3\_21190643-21192440-HERVHF-3LTR - 3  
21171015 21224899 NONHSAT195484.1 - 336

3 54634482 54634938 Homo\_sapiens\_3\_54636349-54637755-HERVHF-5LTR - 3  
54632121 54639857 NONHSAG035219.2 - 456

3 54634482 54634938 Homo\_sapiens\_3\_54636349-54637755-HERVHF-5LTR - 3

|   |           |           |                                                |   |      |  |
|---|-----------|-----------|------------------------------------------------|---|------|--|
|   | 54632121  | 54639857  | NONHSAT090016.2                                | - | 456  |  |
| 3 | 54635330  | 54637456  | Homo_sapiens_3_54636349-54637755-HERVHF-pol    | - | 3    |  |
|   | 54632121  | 54639857  | NONHSAG035219.2                                | - | 2126 |  |
| 3 | 54635330  | 54637456  | Homo_sapiens_3_54636349-54637755-HERVHF-pol    | - | 3    |  |
|   | 54632121  | 54639857  | NONHSAT090016.2                                | - | 2126 |  |
| 3 | 54636914  | 54637756  | Homo_sapiens_3_54636349-54637755-HERVHF-pro    | - | 3    |  |
|   | 54632121  | 54639857  | NONHSAG035219.2                                | - | 842  |  |
| 3 | 54636914  | 54637756  | Homo_sapiens_3_54636349-54637755-HERVHF-pro    | - | 3    |  |
|   | 54632121  | 54639857  | NONHSAT090016.2                                | - | 842  |  |
| 3 | 54637769  | 54638068  | Homo_sapiens_3_54636349-54637755-HERVHF-gag    | - | 3    |  |
|   | 54632121  | 54639857  | NONHSAG035219.2                                | - | 299  |  |
| 3 | 54637769  | 54638068  | Homo_sapiens_3_54636349-54637755-HERVHF-gag    | - | 3    |  |
|   | 54632121  | 54639857  | NONHSAT090016.2                                | - | 299  |  |
| 3 | 54634482  | 54634938  | Homo_sapiens_3_54636349-54637755-HERVHF-5LTR   | - | 3    |  |
|   | 54632122  | 54639857  | ENSG00000265992                                | - | 456  |  |
| 3 | 54635330  | 54637456  | Homo_sapiens_3_54636349-54637755-HERVHF-pol    | - | 3    |  |
|   | 54632122  | 54639857  | ENSG00000265992                                | - | 2126 |  |
| 3 | 54636914  | 54637756  | Homo_sapiens_3_54636349-54637755-HERVHF-pro    | - | 3    |  |
|   | 54632122  | 54639857  | ENSG00000265992                                | - | 842  |  |
| 3 | 54637769  | 54638068  | Homo_sapiens_3_54636349-54637755-HERVHF-gag    | - | 3    |  |
|   | 54632122  | 54639857  | ENSG00000265992                                | - | 299  |  |
| 3 | 112418410 | 112423366 | Homo_sapiens_3_112419312-112420768-HERVHF-     |   | 3    |  |
|   | 112411243 | 112460780 | NONHSAG035734.2                                | - | 4956 |  |
| 3 | 112418410 | 112418865 | Homo_sapiens_3_112419312-112420768-HERVHF-5LTR | - |      |  |
| 3 | 112411243 | 112460780 | NONHSAG035734.2                                | - | 455  |  |
| 3 | 112418410 | 112423366 | Homo_sapiens_3_112419312-112420768-HERVHF-     |   | 3    |  |
|   | 112411243 | 112460780 | NONHSAT091178.2-                               |   | 4956 |  |
| 3 | 112418410 | 112418865 | Homo_sapiens_3_112419312-112420768-HERVHF-5LTR | - |      |  |
| 3 | 112411243 | 112460780 | NONHSAT091178.2-                               |   | 455  |  |
| 3 | 112419048 | 112420617 | Homo_sapiens_3_112419312-112420768-HERVHF-pol  | - | 3    |  |
|   | 112411243 | 112460780 | NONHSAG035734.2                                | - | 1569 |  |
| 3 | 112419048 | 112420617 | Homo_sapiens_3_112419312-112420768-HERVHF-pol  | - | 3    |  |
|   | 112411243 | 112460780 | NONHSAT091178.2-                               |   | 1569 |  |
| 3 | 112420824 | 112421368 | Homo_sapiens_3_112419312-112420768-HERVHF-gag  | - | 3    |  |
|   | 112411243 | 112460780 | NONHSAG035734.2                                | - | 544  |  |
| 3 | 112420824 | 112421368 | Homo_sapiens_3_112419312-112420768-HERVHF-gag  | - | 3    |  |
|   | 112411243 | 112460780 | NONHSAT091178.2-                               |   | 544  |  |
| 3 | 112422911 | 112423366 | Homo_sapiens_3_112419312-112420768-HERVHF-3LTR | - |      |  |
| 3 | 112411243 | 112460780 | NONHSAG035734.2                                | - | 455  |  |
| 3 | 112422911 | 112423366 | Homo_sapiens_3_112419312-112420768-HERVHF-3LTR | - |      |  |
| 3 | 112411243 | 112460780 | NONHSAT091178.2-                               |   | 455  |  |
| 3 | 115798715 | 115799166 | Homo_sapiens_3_115795176-115796709-HERVHF-3LTR | - |      |  |
| 3 | 115797524 | 115799318 | NONHSAG085690.1                                | - | 451  |  |
| 3 | 115798715 | 115799166 | Homo_sapiens_3_115795176-115796709-HERVHF-3LTR | - |      |  |

|   |           |           |                                                |   |      |          |
|---|-----------|-----------|------------------------------------------------|---|------|----------|
| 3 | 115797524 | 115799318 | NONHSAT196129.1                                | - | 451  |          |
| 3 | 155274423 | 155274841 | Homo_sapiens_3_155276457-155278448-HERVHF-5LTR | - |      |          |
| 3 | 155250505 | 155280483 | NONHSAG036456.2                                | - | 418  |          |
| 3 | 155274423 | 155274841 | Homo_sapiens_3_155276457-155278448-HERVHF-5LTR | - |      |          |
| 3 | 155250505 | 155280483 | NONHSAT092826.2                                | - | 418  |          |
| 3 | 155275702 | 155278149 | Homo_sapiens_3_155276457-155278448-HERVHF-pol  | - | 3    |          |
|   | 155250505 | 155280483 | NONHSAG036456.2                                | - | 2447 |          |
| 3 | 155275702 | 155278149 | Homo_sapiens_3_155276457-155278448-HERVHF-pol  | - | 3    |          |
|   | 155250505 | 155280483 | NONHSAT092826.2                                | - | 2447 |          |
| 3 | 155277628 | 155278386 | Homo_sapiens_3_155276457-155278448-HERVHF-pro  | - | 3    |          |
|   | 155250505 | 155280483 | NONHSAG036456.2                                | - | 758  |          |
| 3 | 155277628 | 155278386 | Homo_sapiens_3_155276457-155278448-HERVHF-pro  | - | 3    |          |
|   | 155250505 | 155280483 | NONHSAT092826.2                                | - | 758  |          |
| 3 | 155278439 | 155278762 | Homo_sapiens_3_155276457-155278448-HERVHF-gag  | - | 3    |          |
|   | 155250505 | 155280483 | NONHSAG036456.2                                | - | 323  |          |
| 3 | 155278439 | 155278762 | Homo_sapiens_3_155276457-155278448-HERVHF-gag  | - | 3    |          |
|   | 155250505 | 155280483 | NONHSAT092826.2                                | - | 323  |          |
| 3 | 186660747 | 186661298 | Homo_sapiens_3_186660542-186661888-HERVHF-pro  | + | 3    |          |
|   | 186660216 | 186666181 | ENSG00000113905                                | + | 551  |          |
| 3 | 186660786 | 186662849 | Homo_sapiens_3_186660542-186661888-HERVHF-pol  | + | 3    |          |
|   | 186660216 | 186666181 | ENSG00000113905                                | + | 2063 |          |
| 3 | 186663286 | 186663692 | Homo_sapiens_3_186660542-186661888-HERVHF-3LTR | + |      |          |
| 3 | 186660216 | 186666181 | ENSG00000113905                                | + | 406  |          |
| 4 | 3927445   | 3927854   | Homo_sapiens_4_3929901-3931242-HERVHF-5LTR     | + | 4    | 3905745  |
|   | 3931105   |           | NONHSAG087348.2                                | + | 409  |          |
| 4 | 3929526   | 3929825   | Homo_sapiens_4_3929901-3931242-HERVHF-gag      | + | 4    | 3905745  |
|   | 3931105   |           | NONHSAG087348.2                                | + | 299  |          |
| 4 | 3929852   | 3930682   | Homo_sapiens_4_3929901-3931242-HERVHF-pro      | + | 4    | 3905745  |
|   | 3931105   |           | NONHSAG087348.2                                | + | 830  |          |
| 4 | 3927445   | 3933082   | Homo_sapiens_4_3929901-3931242-HERVHF          | + | 4    | 3927632  |
|   | 3931105   |           | NONHSAT198208.1                                | + | 3473 |          |
| 4 | 3929526   | 3929825   | Homo_sapiens_4_3929901-3931242-HERVHF-gag      | + | 4    | 3927632  |
|   | 3931105   |           | NONHSAT198208.1                                | + | 299  |          |
| 4 | 3929852   | 3930682   | Homo_sapiens_4_3929901-3931242-HERVHF-pro      | + | 4    | 3927632  |
|   | 3931105   |           | NONHSAT198208.1                                | + | 830  |          |
| 4 | 16997808  | 17003928  | Homo_sapiens_4_17000127-17001778-HERVHF        | + | 4    | 16997950 |
|   | 16999118  |           | NONHSAT198342.1                                | + | 1168 |          |
| 4 | 17000545  | 17002680  | Homo_sapiens_4_17000127-17001778-HERVHF-pol    | + | 4    |          |
|   | 16997950  | 17009063  | NONHSAG037572.2                                | + | 2135 |          |
| 4 | 17000545  | 17002680  | Homo_sapiens_4_17000127-17001778-HERVHF-pol    | + | 4    |          |
|   | 16997950  | 17009063  | NONHSAT095697.2                                | + | 2135 |          |
| 4 | 17003527  | 17003928  | Homo_sapiens_4_17000127-17001778-HERVHF-3LTR   | + | 4    |          |
|   | 16997950  | 17009063  | NONHSAG037572.2                                | + | 401  |          |
| 4 | 17003527  | 17003928  | Homo_sapiens_4_17000127-17001778-HERVHF-3LTR   | + | 4    |          |

16997950 17009063 NONHSAT095697.2 + 401

4 24500975 24501427 Homo\_sapiens\_4\_24503534-24505060-HERVHF-5LTR + 4  
24499921 24501593 NONHSAG037630.2 + 452

4 24500975 24501427 Homo\_sapiens\_4\_24503534-24505060-HERVHF-5LTR + 4  
24499921 24501593 NONHSAT095802.2 + 452

4 27974874 27981319 Homo\_sapiens\_4\_27976550-27977552-HERVHF + 4 27902566  
28003138 NONHSAG037691.2 + 6445

4 27974874 27975246 Homo\_sapiens\_4\_27976550-27977552-HERVHF-5LTR + 4  
27902566 28003138 NONHSAG037691.2 + 372

4 27974874 27981319 Homo\_sapiens\_4\_27976550-27977552-HERVHF + 4 27902566  
27993633 NONHSAT095904.2 + 6445

4 27974874 27975246 Homo\_sapiens\_4\_27976550-27977552-HERVHF-5LTR + 4  
27902566 27993633 NONHSAT095904.2 + 372

4 27975998 27976339 Homo\_sapiens\_4\_27976550-27977552-HERVHF-gag + 4  
27902566 28003138 NONHSAG037691.2 + 341

4 27975998 27976339 Homo\_sapiens\_4\_27976550-27977552-HERVHF-gag + 4  
27902566 27993633 NONHSAT095904.2 + 341

4 27976612 27977274 Homo\_sapiens\_4\_27976550-27977552-HERVHF-pro + 4  
27902566 28003138 NONHSAG037691.2 + 662

4 27976612 27977274 Homo\_sapiens\_4\_27976550-27977552-HERVHF-pro + 4  
27902566 27993633 NONHSAT095904.2 + 662

4 27976735 27980331 Homo\_sapiens\_4\_27976550-27977552-HERVHF-pol + 4  
27902566 28003138 NONHSAG037691.2 + 3596

4 27976735 27980331 Homo\_sapiens\_4\_27976550-27977552-HERVHF-pol + 4  
27902566 27993633 NONHSAT095904.2 + 3596

4 27980964 27981319 Homo\_sapiens\_4\_27976550-27977552-HERVHF-3LTR + 4  
27902566 28003138 NONHSAG037691.2 + 355

4 27980964 27981319 Homo\_sapiens\_4\_27976550-27977552-HERVHF-3LTR + 4  
27902566 27993633 NONHSAT095904.2 + 355

4 27974874 27981319 Homo\_sapiens\_4\_27976550-27977552-HERVHF + 4 27902568  
28003138 NONHSAT198438.1 + 6445

4 27974874 27975246 Homo\_sapiens\_4\_27976550-27977552-HERVHF-5LTR + 4  
27902568 28003138 NONHSAT198438.1 + 372

4 27975998 27976339 Homo\_sapiens\_4\_27976550-27977552-HERVHF-gag + 4  
27902568 28003138 NONHSAT198438.1 + 341

4 27976612 27977274 Homo\_sapiens\_4\_27976550-27977552-HERVHF-pro + 4  
27902568 28003138 NONHSAT198438.1 + 662

4 27976735 27980331 Homo\_sapiens\_4\_27976550-27977552-HERVHF-pol + 4  
27902568 28003138 NONHSAT198438.1 + 3596

4 27980964 27981319 Homo\_sapiens\_4\_27976550-27977552-HERVHF-3LTR + 4  
27902568 28003138 NONHSAT198438.1 + 355

4 92271492 92271860 Homo\_sapiens\_4\_92273363-92274770-HERVHF-5LTR - 4  
92255183 92277377 NONHSAG038435.2 - 368

4 92271492 92271860 Homo\_sapiens\_4\_92273363-92274770-HERVHF-5LTR - 4

|   |                                                                |   |      |  |
|---|----------------------------------------------------------------|---|------|--|
|   | 92255183 92277377 NONHSAT097428.2                              | - | 368  |  |
| 4 | 92272378 92274561 Homo_sapiens_4_92273363-92274770-HERVHF-pol  | - | 4    |  |
|   | 92255183 92277377 NONHSAG038435.2                              | - | 2183 |  |
| 4 | 92272378 92274561 Homo_sapiens_4_92273363-92274770-HERVHF-pol  | - | 4    |  |
|   | 92255183 92277377 NONHSAT097428.2                              | - | 2183 |  |
| 4 | 92273926 92274771 Homo_sapiens_4_92273363-92274770-HERVHF-pro  | - | 4    |  |
|   | 92255183 92277377 NONHSAG038435.2                              | - | 845  |  |
| 4 | 92273926 92274771 Homo_sapiens_4_92273363-92274770-HERVHF-pro  | - | 4    |  |
|   | 92255183 92277377 NONHSAT097428.2                              | - | 845  |  |
| 4 | 92274781 92275299 Homo_sapiens_4_92273363-92274770-HERVHF-gag  | - | 4    |  |
|   | 92255183 92277377 NONHSAG038435.2                              | - | 518  |  |
| 4 | 92274781 92275299 Homo_sapiens_4_92273363-92274770-HERVHF-gag  | - | 4    |  |
|   | 92255183 92277377 NONHSAT097428.2                              | - | 518  |  |
| 4 | 92271492 92271860 Homo_sapiens_4_92273363-92274770-HERVHF-5LTR | - | 4    |  |
|   | 92262497 92277302 NONHSAT097430.2                              | - | 368  |  |
| 4 | 92272378 92274561 Homo_sapiens_4_92273363-92274770-HERVHF-pol  | - | 4    |  |
|   | 92262497 92277302 NONHSAT097430.2                              | - | 2183 |  |
| 4 | 92273926 92274771 Homo_sapiens_4_92273363-92274770-HERVHF-pro  | - | 4    |  |
|   | 92262497 92277302 NONHSAT097430.2                              | - | 845  |  |
| 4 | 92274781 92275299 Homo_sapiens_4_92273363-92274770-HERVHF-gag  | - | 4    |  |
|   | 92262497 92277302 NONHSAT097430.2                              | - | 518  |  |
| 4 | 92271492 92271860 Homo_sapiens_4_92273363-92274770-HERVHF-5LTR | - | 4    |  |
|   | 92262498 92277076 NONHSAT200205.1                              | - | 368  |  |
| 4 | 92272378 92274561 Homo_sapiens_4_92273363-92274770-HERVHF-pol  | - | 4    |  |
|   | 92262498 92277076 NONHSAT200205.1                              | - | 2183 |  |
| 4 | 92273926 92274771 Homo_sapiens_4_92273363-92274770-HERVHF-pro  | - | 4    |  |
|   | 92262498 92277076 NONHSAT200205.1                              | - | 845  |  |
| 4 | 92274781 92275299 Homo_sapiens_4_92273363-92274770-HERVHF-gag  | - | 4    |  |
|   | 92262498 92277076 NONHSAT200205.1                              | - | 518  |  |
| 4 | 92271492 92271860 Homo_sapiens_4_92273363-92274770-HERVHF-5LTR | - | 4    |  |
|   | 92268766 92277075 NONHSAT097431.2                              | - | 368  |  |
| 4 | 92272378 92274561 Homo_sapiens_4_92273363-92274770-HERVHF-pol  | - | 4    |  |
|   | 92268766 92277075 NONHSAT097431.2                              | - | 2183 |  |
| 4 | 92273926 92274771 Homo_sapiens_4_92273363-92274770-HERVHF-pro  | - | 4    |  |
|   | 92268766 92277075 NONHSAT097431.2                              | - | 845  |  |
| 4 | 92274781 92275299 Homo_sapiens_4_92273363-92274770-HERVHF-gag  | - | 4    |  |
|   | 92268766 92277075 NONHSAT097431.2                              | - | 518  |  |
| 4 | 92271492 92271860 Homo_sapiens_4_92273363-92274770-HERVHF-5LTR | - | 4    |  |
|   | 92268767 92277075 ENSG00000249152                              | - | 368  |  |
| 4 | 92272378 92274561 Homo_sapiens_4_92273363-92274770-HERVHF-pol  | - | 4    |  |
|   | 92268767 92277075 ENSG00000249152                              | - | 2183 |  |
| 4 | 92273926 92274771 Homo_sapiens_4_92273363-92274770-HERVHF-pro  | - | 4    |  |
|   | 92268767 92277075 ENSG00000249152                              | - | 845  |  |
| 4 | 92274781 92275299 Homo_sapiens_4_92273363-92274770-HERVHF-gag  | - | 4    |  |

92268767 92277075 ENSG00000249152 - 518

|   |           |           |                                                |      |
|---|-----------|-----------|------------------------------------------------|------|
| 4 | 103553770 | 103554203 | Homo_sapiens_4_103555460-103556971-HERVHF-5LTR | -    |
| 4 | 103550586 | 103559147 | ENSG00000250920 -                              | 433  |
| 4 | 103553770 | 103554203 | Homo_sapiens_4_103555460-103556971-HERVHF-5LTR | -    |
| 4 | 103550586 | 103559112 | ENSG00000250920 -                              | 433  |
| 4 | 103554640 | 103556729 | Homo_sapiens_4_103555460-103556971-HERVHF-pol  | - 4  |
|   | 103550586 | 103559147 | ENSG00000250920 -                              | 2089 |
| 4 | 103554640 | 103556729 | Homo_sapiens_4_103555460-103556971-HERVHF-pol  | - 4  |
|   | 103550586 | 103559112 | ENSG00000250920 -                              | 2089 |
| 4 | 103556187 | 103557020 | Homo_sapiens_4_103555460-103556971-HERVHF-pro  | - 4  |
|   | 103550586 | 103559147 | ENSG00000250920 -                              | 833  |
| 4 | 103556187 | 103557020 | Homo_sapiens_4_103555460-103556971-HERVHF-pro  | - 4  |
|   | 103550586 | 103559112 | ENSG00000250920 -                              | 833  |
| 4 | 103557024 | 103557353 | Homo_sapiens_4_103555460-103556971-HERVHF-gag  | - 4  |
|   | 103550586 | 103559147 | ENSG00000250920 -                              | 329  |
| 4 | 103557024 | 103557353 | Homo_sapiens_4_103555460-103556971-HERVHF-gag  | - 4  |
|   | 103550586 | 103559112 | ENSG00000250920 -                              | 329  |
| 4 | 103553770 | 103554203 | Homo_sapiens_4_103555460-103556971-HERVHF-5LTR | -    |
| 4 | 103550589 | 103559277 | ENSG00000250920 -                              | 433  |
| 4 | 103553770 | 103554203 | Homo_sapiens_4_103555460-103556971-HERVHF-5LTR | -    |
| 4 | 103550589 | 103559271 | ENSG00000250920 -                              | 433  |
| 4 | 103553770 | 103554203 | Homo_sapiens_4_103555460-103556971-HERVHF-5LTR | -    |
| 4 | 103550589 | 103559271 | ENSG00000250920 -                              | 433  |
| 4 | 103554640 | 103556729 | Homo_sapiens_4_103555460-103556971-HERVHF-pol  | - 4  |
|   | 103550589 | 103559277 | ENSG00000250920 -                              | 2089 |
| 4 | 103554640 | 103556729 | Homo_sapiens_4_103555460-103556971-HERVHF-pol  | - 4  |
|   | 103550589 | 103559271 | ENSG00000250920 -                              | 2089 |
| 4 | 103554640 | 103556729 | Homo_sapiens_4_103555460-103556971-HERVHF-pol  | - 4  |
|   | 103550589 | 103559271 | ENSG00000250920 -                              | 2089 |
| 4 | 103556187 | 103557020 | Homo_sapiens_4_103555460-103556971-HERVHF-pro  | - 4  |
|   | 103550589 | 103559277 | ENSG00000250920 -                              | 833  |
| 4 | 103556187 | 103557020 | Homo_sapiens_4_103555460-103556971-HERVHF-pro  | - 4  |
|   | 103550589 | 103559271 | ENSG00000250920 -                              | 833  |
| 4 | 103556187 | 103557020 | Homo_sapiens_4_103555460-103556971-HERVHF-pro  | - 4  |
|   | 103550589 | 103559271 | ENSG00000250920 -                              | 833  |
| 4 | 103557024 | 103557353 | Homo_sapiens_4_103555460-103556971-HERVHF-gag  | - 4  |
|   | 103550589 | 103559277 | ENSG00000250920 -                              | 329  |
| 4 | 103557024 | 103557353 | Homo_sapiens_4_103555460-103556971-HERVHF-gag  | - 4  |
|   | 103550589 | 103559271 | ENSG00000250920 -                              | 329  |
| 4 | 103557024 | 103557353 | Homo_sapiens_4_103555460-103556971-HERVHF-gag  | - 4  |
|   | 103550589 | 103559271 | ENSG00000250920 -                              | 329  |
| 4 | 103553770 | 103554203 | Homo_sapiens_4_103555460-103556971-HERVHF-5LTR | -    |
| 4 | 103550592 | 103559147 | ENSG00000250920 -                              | 433  |
| 4 | 103554640 | 103556729 | Homo_sapiens_4_103555460-103556971-HERVHF-pol  | - 4  |

|   |           |           |                                                |      |      |
|---|-----------|-----------|------------------------------------------------|------|------|
|   | 103550592 | 103559147 | ENSG00000250920 -                              | 2089 |      |
| 4 | 103556187 | 103557020 | Homo_sapiens_4_103555460-103556971-HERVHF-pro  | -    | 4    |
|   | 103550592 | 103559147 | ENSG00000250920 -                              | 833  |      |
| 4 | 103557024 | 103557353 | Homo_sapiens_4_103555460-103556971-HERVHF-gag  | -    | 4    |
|   | 103550592 | 103559147 | ENSG00000250920 -                              | 329  |      |
| 4 | 103553770 | 103554203 | Homo_sapiens_4_103555460-103556971-HERVHF-5LTR | -    |      |
| 4 | 103550926 | 103559127 | NONHSAG038544.2                                | -    | 433  |
| 4 | 103553770 | 103554203 | Homo_sapiens_4_103555460-103556971-HERVHF-5LTR | -    |      |
| 4 | 103550926 | 103559127 | NONHSAT097639.2                                | -    | 433  |
| 4 | 103554640 | 103556729 | Homo_sapiens_4_103555460-103556971-HERVHF-pol  | -    | 4    |
|   | 103550926 | 103559127 | NONHSAG038544.2                                | -    | 2089 |
| 4 | 103554640 | 103556729 | Homo_sapiens_4_103555460-103556971-HERVHF-pol  | -    | 4    |
|   | 103550926 | 103559127 | NONHSAT097639.2                                | -    | 2089 |
| 4 | 103556187 | 103557020 | Homo_sapiens_4_103555460-103556971-HERVHF-pro  | -    | 4    |
|   | 103550926 | 103559127 | NONHSAG038544.2                                | -    | 833  |
| 4 | 103556187 | 103557020 | Homo_sapiens_4_103555460-103556971-HERVHF-pro  | -    | 4    |
|   | 103550926 | 103559127 | NONHSAT097639.2                                | -    | 833  |
| 4 | 103557024 | 103557353 | Homo_sapiens_4_103555460-103556971-HERVHF-gag  | -    | 4    |
|   | 103550926 | 103559127 | NONHSAG038544.2                                | -    | 329  |
| 4 | 103557024 | 103557353 | Homo_sapiens_4_103555460-103556971-HERVHF-gag  | -    | 4    |
|   | 103550926 | 103559127 | NONHSAT097639.2                                | -    | 329  |
| 4 | 103553770 | 103554203 | Homo_sapiens_4_103555460-103556971-HERVHF-5LTR | -    |      |
| 4 | 103550927 | 103559127 | ENSG00000250920 -                              | 433  |      |
| 4 | 103554640 | 103556729 | Homo_sapiens_4_103555460-103556971-HERVHF-pol  | -    | 4    |
|   | 103550927 | 103559127 | ENSG00000250920 -                              | 2089 |      |
| 4 | 103556187 | 103557020 | Homo_sapiens_4_103555460-103556971-HERVHF-pro  | -    | 4    |
|   | 103550927 | 103559127 | ENSG00000250920 -                              | 833  |      |
| 4 | 103557024 | 103557353 | Homo_sapiens_4_103555460-103556971-HERVHF-gag  | -    | 4    |
|   | 103550927 | 103559127 | ENSG00000250920 -                              | 329  |      |
| 4 | 128640901 | 128641313 | Homo_sapiens_4_128642726-128644003-HERVHF-5LTR | -    |      |
| 4 | 128609245 | 128646352 | NONHSAG088517.2                                | -    | 412  |
| 4 | 128641891 | 128643929 | Homo_sapiens_4_128642726-128644003-HERVHF-pol  | -    | 4    |
|   | 128609245 | 128646352 | NONHSAG088517.2                                | -    | 2038 |
| 4 | 128643291 | 128643971 | Homo_sapiens_4_128642726-128644003-HERVHF-pro  | -    | 4    |
|   | 128609245 | 128646352 | NONHSAG088517.2                                | -    | 680  |
| 4 | 128644112 | 128644450 | Homo_sapiens_4_128642726-128644003-HERVHF-gag  | -    | 4    |
|   | 128609245 | 128646352 | NONHSAG088517.2                                | -    | 338  |
| 4 | 128640901 | 128641313 | Homo_sapiens_4_128642726-128644003-HERVHF-5LTR | -    |      |
| 4 | 128627628 | 128646352 | NONHSAT200384.1                                | -    | 412  |
| 4 | 128640901 | 128641313 | Homo_sapiens_4_128642726-128644003-HERVHF-5LTR | -    |      |
| 4 | 128627628 | 128646352 | NONHSAT200385.1                                | -    | 412  |
| 4 | 128641891 | 128643929 | Homo_sapiens_4_128642726-128644003-HERVHF-pol  | -    | 4    |
|   | 128627628 | 128646352 | NONHSAT200384.1                                | -    | 2038 |
| 4 | 128641891 | 128643929 | Homo_sapiens_4_128642726-128644003-HERVHF-pol  | -    | 4    |



|   |           |           |                                                |   |      |  |
|---|-----------|-----------|------------------------------------------------|---|------|--|
|   | 128627628 | 128646352 | NONHSAT200385.1                                | - | 2038 |  |
| 4 | 128643291 | 128643971 | Homo_sapiens_4_128642726-128644003-HERVHF-pro  | - | 4    |  |
|   | 128627628 | 128646352 | NONHSAT200384.1                                | - | 680  |  |
| 4 | 128643291 | 128643971 | Homo_sapiens_4_128642726-128644003-HERVHF-pro  | - | 4    |  |
|   | 128627628 | 128646352 | NONHSAT200385.1                                | - | 680  |  |
| 4 | 128644112 | 128644450 | Homo_sapiens_4_128642726-128644003-HERVHF-gag  | - | 4    |  |
|   | 128627628 | 128646352 | NONHSAT200384.1                                | - | 338  |  |
| 4 | 128644112 | 128644450 | Homo_sapiens_4_128642726-128644003-HERVHF-gag  | - | 4    |  |
|   | 128627628 | 128646352 | NONHSAT200385.1                                | - | 338  |  |
| 4 | 145698823 | 145703505 | Homo_sapiens_4_145701612-145702617-HERVHF      | + | 4    |  |
|   | 145680146 | 145732797 | ENSG00000237136                                | + | 4682 |  |
| 4 | 145698823 | 145699274 | Homo_sapiens_4_145701612-145702617-HERVHF-5LTR | + |      |  |
| 4 | 145680146 | 145732797 | ENSG00000237136                                | + | 451  |  |
| 4 | 145701596 | 145702378 | Homo_sapiens_4_145701612-145702617-HERVHF-pro  | + | 4    |  |
|   | 145680146 | 145732797 | ENSG00000237136                                | + | 782  |  |
| 4 | 145701734 | 145702528 | Homo_sapiens_4_145701612-145702617-HERVHF-pol  | + | 4    |  |
|   | 145680146 | 145732797 | ENSG00000237136                                | + | 794  |  |
| 4 | 145703056 | 145703505 | Homo_sapiens_4_145701612-145702617-HERVHF-3LTR | + |      |  |
| 4 | 145680146 | 145732797 | ENSG00000237136                                | + | 449  |  |
| 4 | 152741345 | 152747172 | Homo_sapiens_4_152743196-152744540-HERVHF      | - | 4    |  |
|   | 152741397 | 152746621 | NONHSAG039129.2                                | - | 5224 |  |
| 4 | 152741345 | 152747172 | Homo_sapiens_4_152743196-152744540-HERVHF      | - | 4    |  |
|   | 152741397 | 152746621 | NONHSAT098813.2                                | - | 5224 |  |
| 4 | 152742614 | 152744164 | Homo_sapiens_4_152743196-152744540-HERVHF-pol  | - | 4    |  |
|   | 152741397 | 152746621 | NONHSAG039129.2                                | - | 1550 |  |
| 4 | 152742614 | 152744164 | Homo_sapiens_4_152743196-152744540-HERVHF-pol  | - | 4    |  |
|   | 152741397 | 152746621 | NONHSAT098813.2                                | - | 1550 |  |
| 4 | 152743760 | 152744263 | Homo_sapiens_4_152743196-152744540-HERVHF-pro  | - | 4    |  |
|   | 152741397 | 152746621 | NONHSAG039129.2                                | - | 503  |  |
| 4 | 152743760 | 152744263 | Homo_sapiens_4_152743196-152744540-HERVHF-pro  | - | 4    |  |
|   | 152741397 | 152746621 | NONHSAT098813.2                                | - | 503  |  |
| 4 | 175461163 | 175467003 | Homo_sapiens_4_175463047-175464647-HERVHF      | - | 4    |  |
|   | 175457726 | 175473197 | ENSG00000249945                                | - | 5840 |  |
| 4 | 175461163 | 175461498 | Homo_sapiens_4_175463047-175464647-HERVHF-5LTR | - |      |  |
| 4 | 175457726 | 175473197 | ENSG00000249945                                | - | 335  |  |
| 4 | 175462086 | 175464209 | Homo_sapiens_4_175463047-175464647-HERVHF-pol  | - | 4    |  |
|   | 175457726 | 175473197 | ENSG00000249945                                | - | 2123 |  |
| 4 | 175464527 | 175464889 | Homo_sapiens_4_175463047-175464647-HERVHF-pro  | - | 4    |  |
|   | 175457726 | 175473197 | ENSG00000249945                                | - | 362  |  |
| 4 | 175466677 | 175467003 | Homo_sapiens_4_175463047-175464647-HERVHF-3LTR | - |      |  |
| 4 | 175457726 | 175473197 | ENSG00000249945                                | - | 326  |  |
| 4 | 175461163 | 175461498 | Homo_sapiens_4_175463047-175464647-HERVHF-5LTR | - |      |  |
| 4 | 175458288 | 175466697 | NONHSAG039390.2                                | - | 335  |  |
| 4 | 175461163 | 175461498 | Homo_sapiens_4_175463047-175464647-HERVHF-5LTR | - |      |  |

|   |           |                 |                                                |     |      |          |
|---|-----------|-----------------|------------------------------------------------|-----|------|----------|
| 4 | 175458288 | 175466697       | NONHSAT099342.2                                | -   | 335  |          |
| 4 | 175462086 | 175464209       | Homo_sapiens_4_175463047-175464647-HERVHF-pol  | -   | 4    |          |
|   | 175458288 | 175466697       | NONHSAG039390.2                                | -   | 2123 |          |
| 4 | 175462086 | 175464209       | Homo_sapiens_4_175463047-175464647-HERVHF-pol  | -   | 4    |          |
|   | 175458288 | 175466697       | NONHSAT099342.2                                | -   | 2123 |          |
| 4 | 175464527 | 175464889       | Homo_sapiens_4_175463047-175464647-HERVHF-pro  | -   | 4    |          |
|   | 175458288 | 175466697       | NONHSAG039390.2                                | -   | 362  |          |
| 4 | 175464527 | 175464889       | Homo_sapiens_4_175463047-175464647-HERVHF-pro  | -   | 4    |          |
|   | 175458288 | 175466697       | NONHSAT099342.2                                | -   | 362  |          |
| 4 | 175461163 | 175461498       | Homo_sapiens_4_175463047-175464647-HERVHF-5LTR | -   |      |          |
| 4 | 175458289 | 175466697       | ENSG00000249945                                | -   | 335  |          |
| 4 | 175462086 | 175464209       | Homo_sapiens_4_175463047-175464647-HERVHF-pol  | -   | 4    |          |
|   | 175458289 | 175466697       | ENSG00000249945                                | -   | 2123 |          |
| 4 | 175464527 | 175464889       | Homo_sapiens_4_175463047-175464647-HERVHF-pro  | -   | 4    |          |
|   | 175458289 | 175466697       | ENSG00000249945                                | -   | 362  |          |
| 5 | 92826033  | 92826407        | Homo_sapiens_5_92826486-92827829-HERVHF-gag    | +   | 5    |          |
|   | 92823935  | 92844992        | ENSG00000248588                                | +   | 374  |          |
| 5 | 92826862  | 92828213        | Homo_sapiens_5_92826486-92827829-HERVHF-pol    | +   | 5    |          |
|   | 92823935  | 92844992        | ENSG00000248588                                | +   | 1351 |          |
| 5 | 92829273  | 92829706        | Homo_sapiens_5_92826486-92827829-HERVHF-3LTR   | +   | 5    |          |
|   | 92823935  | 92844992        | ENSG00000248588                                | +   | 433  |          |
| 5 | 92826862  | 92828213        | Homo_sapiens_5_92826486-92827829-HERVHF-pol    | +   | 5    |          |
|   | 92826254  | 92844004        | NONHSAG041017.2                                | +   | 1351 |          |
| 5 | 92826862  | 92828213        | Homo_sapiens_5_92826486-92827829-HERVHF-pol    | +   | 5    |          |
|   | 92826254  | 92844004        | NONHSAT102781.2                                | +   | 1351 |          |
| 5 | 92829273  | 92829706        | Homo_sapiens_5_92826486-92827829-HERVHF-3LTR   | +   | 5    |          |
|   | 92826254  | 92844004        | NONHSAG041017.2                                | +   | 433  |          |
| 5 | 92829273  | 92829706        | Homo_sapiens_5_92826486-92827829-HERVHF-3LTR   | +   | 5    |          |
|   | 92826254  | 92844004        | NONHSAT102781.2                                | +   | 433  |          |
| 5 | 92826862  | 92828213        | Homo_sapiens_5_92826486-92827829-HERVHF-pol    | +   | 5    |          |
|   | 92826255  | 92844004        | ENSG00000248588                                | +   | 1351 |          |
| 5 | 92829273  | 92829706        | Homo_sapiens_5_92826486-92827829-HERVHF-3LTR   | +   | 5    |          |
|   | 92826255  | 92844004        | ENSG00000248588                                | +   | 433  |          |
| 5 | 92823742  | 92829706        | Homo_sapiens_5_92826486-92827829-HERVHF        | +   | 5    | 92828197 |
|   | 92828613  | NONHSAG041018.2 | +                                              | 416 |      |          |
| 5 | 92823742  | 92829706        | Homo_sapiens_5_92826486-92827829-HERVHF        | +   | 5    | 92828197 |
|   | 92828613  | NONHSAT102782.2 | +                                              | 416 |      |          |
| 5 | 136303790 | 136304620       | Homo_sapiens_5_136303833-136305180-HERVHF-pro  | +   | 5    |          |
|   | 136303756 | 136316101       | NONHSAG041632.2                                | +   | 830  |          |
| 5 | 136303790 | 136304620       | Homo_sapiens_5_136303833-136305180-HERVHF-pro  | +   | 5    |          |
|   | 136303756 | 136316100       | NONHSAT103961.2                                | +   | 830  |          |
| 5 | 136304078 | 136305769       | Homo_sapiens_5_136303833-136305180-HERVHF-pol  | +   | 5    |          |
|   | 136303756 | 136316101       | NONHSAG041632.2                                | +   | 1691 |          |
| 5 | 136304078 | 136305769       | Homo_sapiens_5_136303833-136305180-HERVHF-pol  | +   | 5    |          |

|   |           |                 |                                                |                 |      |          |
|---|-----------|-----------------|------------------------------------------------|-----------------|------|----------|
|   | 136303756 | 136316100       | NONHSAT103961.2                                | +               | 1691 |          |
| 5 | 136306563 | 136307028       | Homo_sapiens_5_136303833-136305180-HERVHF-3LTR | +               |      |          |
|   | 5         | 136303756       | 136316101                                      | NONHSAG041632.2 | +    | 465      |
| 5 | 136306563 | 136307028       | Homo_sapiens_5_136303833-136305180-HERVHF-3LTR | +               |      |          |
|   | 5         | 136303756       | 136316100                                      | NONHSAT103961.2 | +    | 465      |
| 5 | 136303790 | 136304620       | Homo_sapiens_5_136303833-136305180-HERVHF-pro  | +               |      | 5        |
|   | 136303757 | 136316100       | ENSG00000250947                                | +               | 830  |          |
| 5 | 136303790 | 136304620       | Homo_sapiens_5_136303833-136305180-HERVHF-pro  | +               |      | 5        |
|   | 136303757 | 136316101       | NONHSAT203263.1                                | +               | 830  |          |
| 5 | 136304078 | 136305769       | Homo_sapiens_5_136303833-136305180-HERVHF-pol  | +               |      | 5        |
|   | 136303757 | 136316100       | ENSG00000250947                                | +               | 1691 |          |
| 5 | 136304078 | 136305769       | Homo_sapiens_5_136303833-136305180-HERVHF-pol  | +               |      | 5        |
|   | 136303757 | 136316101       | NONHSAT203263.1                                | +               | 1691 |          |
| 5 | 136306563 | 136307028       | Homo_sapiens_5_136303833-136305180-HERVHF-3LTR | +               |      |          |
|   | 5         | 136303757       | 136316100                                      | ENSG00000250947 | +    | 465      |
| 5 | 136306563 | 136307028       | Homo_sapiens_5_136303833-136305180-HERVHF-3LTR | +               |      |          |
|   | 5         | 136303757       | 136316101                                      | NONHSAT203263.1 | +    | 465      |
| 5 | 161245405 | 161254586       | Homo_sapiens_5_161251016-161252646-HERVHF      | +               |      | 5        |
|   | 161246663 | 161247643       | NONHSAG090654.1                                | +               | 980  |          |
| 5 | 161245405 | 161254586       | Homo_sapiens_5_161251016-161252646-HERVHF      | +               |      | 5        |
|   | 161246663 | 161247643       | NONHSAT203511.1                                | +               | 980  |          |
| 6 | 16259010  | 16264893        | Homo_sapiens_6_16260854-16262201-HERVHF        | -               | 6    | 16259100 |
|   | 16264553  | NONHSAG113149.1 |                                                | -               | 5453 |          |
| 6 | 16259010  | 16264893        | Homo_sapiens_6_16260854-16262201-HERVHF        | -               | 6    | 16259100 |
|   | 16262926  | NONHSAT252012.1 |                                                | -               | 3826 |          |
| 6 | 16260019  | 16261731        | Homo_sapiens_6_16260854-16262201-HERVHF-pol    | -               | 6    |          |
|   | 16259100  | 16264553        | NONHSAG113149.1                                | -               | 1712 |          |
| 6 | 16260019  | 16261731        | Homo_sapiens_6_16260854-16262201-HERVHF-pol    | -               | 6    |          |
|   | 16259100  | 16262926        | NONHSAT252012.1                                | -               | 1712 |          |
| 6 | 16261417  | 16262241        | Homo_sapiens_6_16260854-16262201-HERVHF-pro    | -               | 6    |          |
|   | 16259100  | 16264553        | NONHSAG113149.1                                | -               | 824  |          |
| 6 | 16261417  | 16262241        | Homo_sapiens_6_16260854-16262201-HERVHF-pro    | -               | 6    |          |
|   | 16259100  | 16262926        | NONHSAT252012.1                                | -               | 824  |          |
| 6 | 16259010  | 16264893        | Homo_sapiens_6_16260854-16262201-HERVHF        | -               | 6    | 16259101 |
|   | 16262926  | ENSG00000282024 |                                                | -               | 3825 |          |
| 6 | 16260019  | 16261731        | Homo_sapiens_6_16260854-16262201-HERVHF-pol    | -               | 6    |          |
|   | 16259101  | 16262926        | ENSG00000282024                                | -               | 1712 |          |
| 6 | 16261417  | 16262241        | Homo_sapiens_6_16260854-16262201-HERVHF-pro    | -               | 6    |          |
|   | 16259101  | 16262926        | ENSG00000282024                                | -               | 824  |          |
| 6 | 16259010  | 16264893        | Homo_sapiens_6_16260854-16262201-HERVHF        | -               | 6    | 16262681 |
|   | 16264553  | NONHSAT252013.1 |                                                | -               | 1872 |          |
| 6 | 16259010  | 16264893        | Homo_sapiens_6_16260854-16262201-HERVHF        | -               | 6    | 16262682 |
|   | 16264553  | ENSG00000282024 |                                                | -               | 1871 |          |
| 6 | 18754142  | 18754535        | Homo_sapiens_6_18755932-18757277-HERVHF-5LTR   | -               | 6    |          |

|   |                                                                |   |      |          |
|---|----------------------------------------------------------------|---|------|----------|
|   | 18743775 18757467 NONHSAG043117.2                              | - | 393  |          |
| 6 | 18754142 18754535 Homo_sapiens_6_18755932-18757277-HERVHF-5LTR | - | 6    |          |
|   | 18743775 18757467 NONHSAT107982.2                              | - | 393  |          |
| 6 | 18754988 18756902 Homo_sapiens_6_18755932-18757277-HERVHF-pol  | - | 6    |          |
|   | 18743775 18757467 NONHSAG043117.2                              | - | 1914 |          |
| 6 | 18754988 18756902 Homo_sapiens_6_18755932-18757277-HERVHF-pol  | - | 6    |          |
|   | 18743775 18757467 NONHSAT107982.2                              | - | 1914 |          |
| 6 | 80509795 80515805 Homo_sapiens_6_80511941-80513513-HERVHF      | - | 6    | 80487666 |
|   | 80548762 NONHSAG113295.1                                       | - | 6010 |          |
| 6 | 80509795 80510208 Homo_sapiens_6_80511941-80513513-HERVHF-5LTR | - | 6    |          |
|   | 80487666 80548762 NONHSAG113295.1                              | - | 413  |          |
| 6 | 80509795 80515805 Homo_sapiens_6_80511941-80513513-HERVHF      | - | 6    | 80487666 |
|   | 80548659 NONHSAT252454.1                                       | - | 6010 |          |
| 6 | 80509795 80510208 Homo_sapiens_6_80511941-80513513-HERVHF-5LTR | - | 6    |          |
|   | 80487666 80548659 NONHSAT252454.1                              | - | 413  |          |
| 6 | 80510376 80513272 Homo_sapiens_6_80511941-80513513-HERVHF-pol  | - | 6    |          |
|   | 80487666 80548762 NONHSAG113295.1                              | - | 2896 |          |
| 6 | 80510376 80513272 Homo_sapiens_6_80511941-80513513-HERVHF-pol  | - | 6    |          |
|   | 80487666 80548659 NONHSAT252454.1                              | - | 2896 |          |
| 6 | 80512745 80513302 Homo_sapiens_6_80511941-80513513-HERVHF-pro  | - | 6    |          |
|   | 80487666 80548762 NONHSAG113295.1                              | - | 557  |          |
| 6 | 80512745 80513302 Homo_sapiens_6_80511941-80513513-HERVHF-pro  | - | 6    |          |
|   | 80487666 80548659 NONHSAT252454.1                              | - | 557  |          |
| 6 | 80513596 80513907 Homo_sapiens_6_80511941-80513513-HERVHF-gag  | - | 6    |          |
|   | 80487666 80548762 NONHSAG113295.1                              | - | 311  |          |
| 6 | 80513596 80513907 Homo_sapiens_6_80511941-80513513-HERVHF-gag  | - | 6    |          |
|   | 80487666 80548659 NONHSAT252454.1                              | - | 311  |          |
| 6 | 80515391 80515805 Homo_sapiens_6_80511941-80513513-HERVHF-3LTR | - | 6    |          |
|   | 80487666 80548762 NONHSAG113295.1                              | - | 414  |          |
| 6 | 80515391 80515805 Homo_sapiens_6_80511941-80513513-HERVHF-3LTR | - | 6    |          |
|   | 80487666 80548659 NONHSAT252454.1                              | - | 414  |          |
| 6 | 80509795 80515805 Homo_sapiens_6_80511941-80513513-HERVHF      | - | 6    | 80508653 |
|   | 80548762 NONHSAT252455.1                                       | - | 6010 |          |
| 6 | 80509795 80510208 Homo_sapiens_6_80511941-80513513-HERVHF-5LTR | - | 6    |          |
|   | 80508653 80548762 NONHSAT252455.1                              | - | 413  |          |
| 6 | 80510376 80513272 Homo_sapiens_6_80511941-80513513-HERVHF-pol  | - | 6    |          |
|   | 80508653 80548762 NONHSAT252455.1                              | - | 2896 |          |
| 6 | 80512745 80513302 Homo_sapiens_6_80511941-80513513-HERVHF-pro  | - | 6    |          |
|   | 80508653 80548762 NONHSAT252455.1                              | - | 557  |          |
| 6 | 80513596 80513907 Homo_sapiens_6_80511941-80513513-HERVHF-gag  | - | 6    |          |
|   | 80508653 80548762 NONHSAT252455.1                              | - | 311  |          |
| 6 | 80515391 80515805 Homo_sapiens_6_80511941-80513513-HERVHF-3LTR | - | 6    |          |
|   | 80508653 80548762 NONHSAT252455.1                              | - | 414  |          |
| 6 | 94553917 94559610 Homo_sapiens_6_94555806-94557152-HERVHF      | - | 6    | 94546196 |

94607932 NONHSAG044390.2 - 5693

6 94553917 94554368 Homo\_sapiens\_6\_94555806-94557152-HERVHF-5LTR - 6  
94546196 94607932 NONHSAG044390.2 - 451

6 94553917 94559610 Homo\_sapiens\_6\_94555806-94557152-HERVHF - 6 94546196  
94573623 NONHSAT209443.1 - 5693

6 94553917 94554368 Homo\_sapiens\_6\_94555806-94557152-HERVHF-5LTR - 6  
94546196 94573623 NONHSAT209443.1 - 451

6 94554823 94556910 Homo\_sapiens\_6\_94555806-94557152-HERVHF-pol - 6  
94546196 94607932 NONHSAG044390.2 - 2087

6 94554823 94556910 Homo\_sapiens\_6\_94555806-94557152-HERVHF-pol - 6  
94546196 94573623 NONHSAT209443.1 - 2087

6 94556395 94557201 Homo\_sapiens\_6\_94555806-94557152-HERVHF-pro - 6  
94546196 94607932 NONHSAG044390.2 - 806

6 94556395 94557201 Homo\_sapiens\_6\_94555806-94557152-HERVHF-pro - 6  
94546196 94573623 NONHSAT209443.1 - 806

6 94559159 94559610 Homo\_sapiens\_6\_94555806-94557152-HERVHF-3LTR - 6  
94546196 94607932 NONHSAG044390.2 - 451

6 94559159 94559610 Homo\_sapiens\_6\_94555806-94557152-HERVHF-3LTR - 6  
94546196 94573623 NONHSAT209443.1 - 451

6 94553917 94559610 Homo\_sapiens\_6\_94555806-94557152-HERVHF - 6 94546571  
94607932 NONHSAT114040.2- 5693

6 94553917 94554368 Homo\_sapiens\_6\_94555806-94557152-HERVHF-5LTR - 6  
94546571 94607932 NONHSAT114040.2- 451

6 94554823 94556910 Homo\_sapiens\_6\_94555806-94557152-HERVHF-pol - 6  
94546571 94607932 NONHSAT114040.2- 2087

6 94556395 94557201 Homo\_sapiens\_6\_94555806-94557152-HERVHF-pro - 6  
94546571 94607932 NONHSAT114040.2- 806

6 94559159 94559610 Homo\_sapiens\_6\_94555806-94557152-HERVHF-3LTR - 6  
94546571 94607932 NONHSAT114040.2- 451

6 97779489 97785327 Homo\_sapiens\_6\_97782122-97783636-HERVHF + 6 97282325  
98400189 NONHSAG044421.3 + 5838

6 97779489 97779949 Homo\_sapiens\_6\_97782122-97783636-HERVHF-5LTR + 6  
97282325 98400189 NONHSAG044421.3 + 460

6 97782076 97782870 Homo\_sapiens\_6\_97782122-97783636-HERVHF-pro + 6  
97282325 98400189 NONHSAG044421.3 + 794

6 97782271 97784463 Homo\_sapiens\_6\_97782122-97783636-HERVHF-pol + 6  
97282325 98400189 NONHSAG044421.3 + 2192

6 97784874 97785327 Homo\_sapiens\_6\_97782122-97783636-HERVHF-3LTR + 6  
97282325 98400189 NONHSAG044421.3 + 453

6 97779489 97785327 Homo\_sapiens\_6\_97782122-97783636-HERVHF + 6 97305553  
98398783 ENSG00000271860 + 5838

6 97779489 97779949 Homo\_sapiens\_6\_97782122-97783636-HERVHF-5LTR + 6  
97305553 98398783 ENSG00000271860 + 460

6 97782076 97782870 Homo\_sapiens\_6\_97782122-97783636-HERVHF-pro + 6

97305553 98398783 ENSG00000271860 + 794  
 6 97782271 97784463 Homo\_sapiens\_6\_97782122-97783636-HERVHF-pol + 6  
 97305553 98398783 ENSG00000271860 + 2192  
 6 97784874 97785327 Homo\_sapiens\_6\_97782122-97783636-HERVHF-3LTR + 6  
 97305553 98398783 ENSG00000271860 + 453  
 6 97779489 97785327 Homo\_sapiens\_6\_97782122-97783636-HERVHF + 6 97305577  
 98398863 ENSG00000271860 + 5838  
 6 97779489 97779949 Homo\_sapiens\_6\_97782122-97783636-HERVHF-5LTR + 6  
 97305577 98398863 ENSG00000271860 + 460  
 6 97782076 97782870 Homo\_sapiens\_6\_97782122-97783636-HERVHF-pro + 6  
 97305577 98398863 ENSG00000271860 + 794  
 6 97782271 97784463 Homo\_sapiens\_6\_97782122-97783636-HERVHF-pol + 6  
 97305577 98398863 ENSG00000271860 + 2192  
 6 97784874 97785327 Homo\_sapiens\_6\_97782122-97783636-HERVHF-3LTR + 6  
 97305577 98398863 ENSG00000271860 + 453  
 6 97779489 97785327 Homo\_sapiens\_6\_97782122-97783636-HERVHF + 6 97305592  
 97828320 ENSG00000271860 + 5838  
 6 97779489 97779949 Homo\_sapiens\_6\_97782122-97783636-HERVHF-5LTR + 6  
 97305592 97828320 ENSG00000271860 + 460  
 6 97782076 97782870 Homo\_sapiens\_6\_97782122-97783636-HERVHF-pro + 6  
 97305592 97828320 ENSG00000271860 + 794  
 6 97782271 97784463 Homo\_sapiens\_6\_97782122-97783636-HERVHF-pol + 6  
 97305592 97828320 ENSG00000271860 + 2192  
 6 97784874 97785327 Homo\_sapiens\_6\_97782122-97783636-HERVHF-3LTR + 6  
 97305592 97828320 ENSG00000271860 + 453  
 6 97779489 97785327 Homo\_sapiens\_6\_97782122-97783636-HERVHF + 6 97305607  
 98399462 NONHSAT251316.1 + 5838  
 6 97779489 97779949 Homo\_sapiens\_6\_97782122-97783636-HERVHF-5LTR + 6  
 97305607 98399462 NONHSAT251316.1 + 460  
 6 97782076 97782870 Homo\_sapiens\_6\_97782122-97783636-HERVHF-pro + 6  
 97305607 98399462 NONHSAT251316.1 + 794  
 6 97782271 97784463 Homo\_sapiens\_6\_97782122-97783636-HERVHF-pol + 6  
 97305607 98399462 NONHSAT251316.1 + 2192  
 6 97784874 97785327 Homo\_sapiens\_6\_97782122-97783636-HERVHF-3LTR + 6  
 97305607 98399462 NONHSAT251316.1 + 453  
 6 97779489 97785327 Homo\_sapiens\_6\_97782122-97783636-HERVHF + 6 97305881  
 98133972 ENSG00000271860 + 5838  
 6 97779489 97779949 Homo\_sapiens\_6\_97782122-97783636-HERVHF-5LTR + 6  
 97305881 98133972 ENSG00000271860 + 460  
 6 97782076 97782870 Homo\_sapiens\_6\_97782122-97783636-HERVHF-pro + 6  
 97305881 98133972 ENSG00000271860 + 794  
 6 97782271 97784463 Homo\_sapiens\_6\_97782122-97783636-HERVHF-pol + 6  
 97305881 98133972 ENSG00000271860 + 2192  
 6 97784874 97785327 Homo\_sapiens\_6\_97782122-97783636-HERVHF-3LTR + 6

97305881 98133972 ENSG00000271860 + 453

6 97779489 97785327 Homo\_sapiens\_6\_97782122-97783636-HERVHF + 6 97412357  
97839433 NONHSAG093448.1 + 5838

6 97779489 97779949 Homo\_sapiens\_6\_97782122-97783636-HERVHF-5LTR + 6  
97412357 97839433 NONHSAG093448.1 + 460

6 97779489 97785327 Homo\_sapiens\_6\_97782122-97783636-HERVHF + 6 97412357  
97815571 NONHSAT207696.1 + 5838

6 97779489 97779949 Homo\_sapiens\_6\_97782122-97783636-HERVHF-5LTR + 6  
97412357 97815571 NONHSAT207696.1 + 460

6 97782076 97782870 Homo\_sapiens\_6\_97782122-97783636-HERVHF-pro + 6  
97412357 97839433 NONHSAG093448.1 + 794

6 97782076 97782870 Homo\_sapiens\_6\_97782122-97783636-HERVHF-pro + 6  
97412357 97815571 NONHSAT207696.1 + 794

6 97782271 97784463 Homo\_sapiens\_6\_97782122-97783636-HERVHF-pol + 6  
97412357 97839433 NONHSAG093448.1 + 2192

6 97782271 97784463 Homo\_sapiens\_6\_97782122-97783636-HERVHF-pol + 6  
97412357 97815571 NONHSAT207696.1 + 2192

6 97784874 97785327 Homo\_sapiens\_6\_97782122-97783636-HERVHF-3LTR + 6  
97412357 97839433 NONHSAG093448.1 + 453

6 97784874 97785327 Homo\_sapiens\_6\_97782122-97783636-HERVHF-3LTR + 6  
97412357 97815571 NONHSAT207696.1 + 453

6 97779489 97785327 Homo\_sapiens\_6\_97782122-97783636-HERVHF + 6 97440833  
98398863 ENSG00000271860 + 5838

6 97779489 97779949 Homo\_sapiens\_6\_97782122-97783636-HERVHF-5LTR + 6  
97440833 98398863 ENSG00000271860 + 460

6 97782076 97782870 Homo\_sapiens\_6\_97782122-97783636-HERVHF-pro + 6  
97440833 98398863 ENSG00000271860 + 794

6 97782271 97784463 Homo\_sapiens\_6\_97782122-97783636-HERVHF-pol + 6  
97440833 98398863 ENSG00000271860 + 2192

6 97784874 97785327 Homo\_sapiens\_6\_97782122-97783636-HERVHF-3LTR + 6  
97440833 98398863 ENSG00000271860 + 453

6 97779489 97785327 Homo\_sapiens\_6\_97782122-97783636-HERVHF + 6 97440844  
97828109 NONHSAT251320.1 + 5838

6 97779489 97779949 Homo\_sapiens\_6\_97782122-97783636-HERVHF-5LTR + 6  
97440844 97828109 NONHSAT251320.1 + 460

6 97779489 97785327 Homo\_sapiens\_6\_97782122-97783636-HERVHF + 6 97440844  
97998895 NONHSAT251321.1 + 5838

6 97779489 97779949 Homo\_sapiens\_6\_97782122-97783636-HERVHF-5LTR + 6  
97440844 97998895 NONHSAT251321.1 + 460

6 97782076 97782870 Homo\_sapiens\_6\_97782122-97783636-HERVHF-pro + 6  
97440844 97828109 NONHSAT251320.1 + 794

6 97782076 97782870 Homo\_sapiens\_6\_97782122-97783636-HERVHF-pro + 6  
97440844 97998895 NONHSAT251321.1 + 794

6 97782271 97784463 Homo\_sapiens\_6\_97782122-97783636-HERVHF-pol + 6

97440844 97828109 NONHSAT251320.1 + 2192

6 97782271 97784463 Homo\_sapiens\_6\_97782122-97783636-HERVHF-pol + 6  
97440844 97998895 NONHSAT251321.1 + 2192

6 97784874 97785327 Homo\_sapiens\_6\_97782122-97783636-HERVHF-3LTR + 6  
97440844 97828109 NONHSAT251320.1 + 453

6 97784874 97785327 Homo\_sapiens\_6\_97782122-97783636-HERVHF-3LTR + 6  
97440844 97998895 NONHSAT251321.1 + 453

6 97779489 97785327 Homo\_sapiens\_6\_97782122-97783636-HERVHF + 6 97440845  
98398863 ENSG00000271860 + 5838

6 97779489 97779949 Homo\_sapiens\_6\_97782122-97783636-HERVHF-5LTR + 6  
97440845 98398863 ENSG00000271860 + 460

6 97779489 97785327 Homo\_sapiens\_6\_97782122-97783636-HERVHF + 6 97440845  
98398863 ENSG00000271860 + 5838

6 97779489 97779949 Homo\_sapiens\_6\_97782122-97783636-HERVHF-5LTR + 6  
97440845 98398863 ENSG00000271860 + 460

6 97782076 97782870 Homo\_sapiens\_6\_97782122-97783636-HERVHF-pro + 6  
97440845 98398863 ENSG00000271860 + 794

6 97782076 97782870 Homo\_sapiens\_6\_97782122-97783636-HERVHF-pro + 6  
97440845 98398863 ENSG00000271860 + 794

6 97782271 97784463 Homo\_sapiens\_6\_97782122-97783636-HERVHF-pol + 6  
97440845 98398863 ENSG00000271860 + 2192

6 97782271 97784463 Homo\_sapiens\_6\_97782122-97783636-HERVHF-pol + 6  
97440845 98398863 ENSG00000271860 + 2192

6 97784874 97785327 Homo\_sapiens\_6\_97782122-97783636-HERVHF-3LTR + 6  
97440845 98398863 ENSG00000271860 + 453

6 97784874 97785327 Homo\_sapiens\_6\_97782122-97783636-HERVHF-3LTR + 6  
97440845 98398863 ENSG00000271860 + 453

6 97779489 97785327 Homo\_sapiens\_6\_97782122-97783636-HERVHF + 6 97440852  
98133704 ENSG00000271860 + 5838

6 97779489 97779949 Homo\_sapiens\_6\_97782122-97783636-HERVHF-5LTR + 6  
97440852 98133704 ENSG00000271860 + 460

6 97782076 97782870 Homo\_sapiens\_6\_97782122-97783636-HERVHF-pro + 6  
97440852 98133704 ENSG00000271860 + 794

6 97782271 97784463 Homo\_sapiens\_6\_97782122-97783636-HERVHF-pol + 6  
97440852 98133704 ENSG00000271860 + 2192

6 97784874 97785327 Homo\_sapiens\_6\_97782122-97783636-HERVHF-3LTR + 6  
97440852 98133704 ENSG00000271860 + 453

6 97779489 97785327 Homo\_sapiens\_6\_97782122-97783636-HERVHF + 6 97440853  
98099256 ENSG00000271860 + 5838

6 97779489 97779949 Homo\_sapiens\_6\_97782122-97783636-HERVHF-5LTR + 6  
97440853 98099256 ENSG00000271860 + 460

6 97782076 97782870 Homo\_sapiens\_6\_97782122-97783636-HERVHF-pro + 6  
97440853 98099256 ENSG00000271860 + 794

6 97782271 97784463 Homo\_sapiens\_6\_97782122-97783636-HERVHF-pol + 6



97440853 98099256 ENSG00000271860 + 2192

6 97784874 97785327 Homo\_sapiens\_6\_97782122-97783636-HERVHF-3LTR + 6  
97440853 98099256 ENSG00000271860 + 453

6 97779489 97785327 Homo\_sapiens\_6\_97782122-97783636-HERVHF + 6 97627074  
97969561 NONHSAT251327.1 + 5838

6 97779489 97779949 Homo\_sapiens\_6\_97782122-97783636-HERVHF-5LTR + 6  
97627074 97969561 NONHSAT251327.1 + 460

6 97782076 97782870 Homo\_sapiens\_6\_97782122-97783636-HERVHF-pro + 6  
97627074 97969561 NONHSAT251327.1 + 794

6 97782271 97784463 Homo\_sapiens\_6\_97782122-97783636-HERVHF-pol + 6  
97627074 97969561 NONHSAT251327.1 + 2192

6 97784874 97785327 Homo\_sapiens\_6\_97782122-97783636-HERVHF-3LTR + 6  
97627074 97969561 NONHSAT251327.1 + 453

6 97779489 97779949 Homo\_sapiens\_6\_97782122-97783636-HERVHF-5LTR + 6  
97773576 97782168 NONHSAG093449.1 + 460

6 97779489 97779949 Homo\_sapiens\_6\_97782122-97783636-HERVHF-5LTR + 6  
97773576 97782168 NONHSAT207699.1 + 460

6 123582333 123588007 Homo\_sapiens\_6\_123584156-123585562-HERVHF - 6  
123216339 123636950 ENSG00000186439 - 5674

6 123582333 123582734 Homo\_sapiens\_6\_123584156-123585562-HERVHF-5LTR -  
6 123216339 123636950 ENSG00000186439 - 401

6 123584586 123585260 Homo\_sapiens\_6\_123584156-123585562-HERVHF-pol - 6  
123216339 123636950 ENSG00000186439 - 674

6 123584721 123585290 Homo\_sapiens\_6\_123584156-123585562-HERVHF-pro - 6  
123216339 123636950 ENSG00000186439 - 569

6 123587604 123588007 Homo\_sapiens\_6\_123584156-123585562-HERVHF-3LTR -  
6 123216339 123636950 ENSG00000186439 - 403

6 123582333 123588007 Homo\_sapiens\_6\_123584156-123585562-HERVHF - 6  
123349475 123636988 ENSG00000186439 - 5674

6 123582333 123582734 Homo\_sapiens\_6\_123584156-123585562-HERVHF-5LTR -  
6 123349475 123636988 ENSG00000186439 - 401

6 123584586 123585260 Homo\_sapiens\_6\_123584156-123585562-HERVHF-pol - 6  
123349475 123636988 ENSG00000186439 - 674

6 123584721 123585290 Homo\_sapiens\_6\_123584156-123585562-HERVHF-pro - 6  
123349475 123636988 ENSG00000186439 - 569

6 123587604 123588007 Homo\_sapiens\_6\_123584156-123585562-HERVHF-3LTR -  
6 123349475 123636988 ENSG00000186439 - 403

6 123582333 123588007 Homo\_sapiens\_6\_123584156-123585562-HERVHF - 6  
123464250 123636909 ENSG00000186439 - 5674

6 123582333 123582734 Homo\_sapiens\_6\_123584156-123585562-HERVHF-5LTR -  
6 123464250 123636909 ENSG00000186439 - 401

6 123584586 123585260 Homo\_sapiens\_6\_123584156-123585562-HERVHF-pol - 6  
123464250 123636909 ENSG00000186439 - 674

6 123584721 123585290 Homo\_sapiens\_6\_123584156-123585562-HERVHF-pro - 6

|   |           |           |                                                |                   |      |     |
|---|-----------|-----------|------------------------------------------------|-------------------|------|-----|
|   | 123464250 | 123636909 | ENSG00000186439 -                              | 569               |      |     |
| 6 | 123587604 | 123588007 | Homo_sapiens_6_123584156-123585562-HERVHF-3LTR | -                 |      |     |
|   | 6         | 123464250 | 123636909                                      | ENSG00000186439 - | 403  |     |
| 6 | 123582333 | 123588007 | Homo_sapiens_6_123584156-123585562-HERVHF      | -                 | 6    |     |
|   | 123503651 | 123637093 | ENSG00000186439 -                              | 5674              |      |     |
| 6 | 123582333 | 123582734 | Homo_sapiens_6_123584156-123585562-HERVHF-5LTR | -                 |      |     |
|   | 6         | 123503651 | 123637093                                      | ENSG00000186439 - | 401  |     |
| 6 | 123584586 | 123585260 | Homo_sapiens_6_123584156-123585562-HERVHF-pol  | -                 | 6    |     |
|   | 123503651 | 123637093 | ENSG00000186439 -                              | 674               |      |     |
| 6 | 123584721 | 123585290 | Homo_sapiens_6_123584156-123585562-HERVHF-pro  | -                 | 6    |     |
|   | 123503651 | 123637093 | ENSG00000186439 -                              | 569               |      |     |
| 6 | 123587604 | 123588007 | Homo_sapiens_6_123584156-123585562-HERVHF-3LTR | -                 |      |     |
|   | 6         | 123503651 | 123637093                                      | ENSG00000186439 - | 403  |     |
| 6 | 123582333 | 123588007 | Homo_sapiens_6_123584156-123585562-HERVHF      | -                 | 6    |     |
|   | 123528681 | 123636972 | ENSG00000186439 -                              | 5674              |      |     |
| 6 | 123582333 | 123582734 | Homo_sapiens_6_123584156-123585562-HERVHF-5LTR | -                 |      |     |
|   | 6         | 123528681 | 123636972                                      | ENSG00000186439 - | 401  |     |
| 6 | 123584586 | 123585260 | Homo_sapiens_6_123584156-123585562-HERVHF-pol  | -                 | 6    |     |
|   | 123528681 | 123636972 | ENSG00000186439 -                              | 674               |      |     |
| 6 | 123584721 | 123585290 | Homo_sapiens_6_123584156-123585562-HERVHF-pro  | -                 | 6    |     |
|   | 123528681 | 123636972 | ENSG00000186439 -                              | 569               |      |     |
| 6 | 123587604 | 123588007 | Homo_sapiens_6_123584156-123585562-HERVHF-3LTR | -                 |      |     |
|   | 6         | 123528681 | 123636972                                      | ENSG00000186439 - | 403  |     |
| 6 | 125701846 | 125707764 | Homo_sapiens_6_125703727-125705069-HERVHF      | -                 | 6    |     |
|   | 125575411 | 125749395 | NONHSAG044767.3                                | -                 | 5918 |     |
| 6 | 125701846 | 125702300 | Homo_sapiens_6_125703727-125705069-HERVHF-5LTR | -                 |      |     |
|   | 6         | 125575411 | 125749395                                      | NONHSAG044767.3   | -    | 454 |
| 6 | 125701846 | 125707764 | Homo_sapiens_6_125703727-125705069-HERVHF      | -                 | 6    |     |
|   | 125575411 | 125749395 | NONHSAT252665.1                                | -                 | 5918 |     |
| 6 | 125701846 | 125702300 | Homo_sapiens_6_125703727-125705069-HERVHF-5LTR | -                 |      |     |
|   | 6         | 125575411 | 125749395                                      | NONHSAT252665.1   | -    | 454 |
| 6 | 125701846 | 125707764 | Homo_sapiens_6_125703727-125705069-HERVHF      | -                 | 6    |     |
|   | 125575411 | 125749395 | NONHSAT252666.1                                | -                 | 5918 |     |
| 6 | 125701846 | 125702300 | Homo_sapiens_6_125703727-125705069-HERVHF-5LTR | -                 |      |     |
|   | 6         | 125575411 | 125749395                                      | NONHSAT252666.1   | -    | 454 |
| 6 | 125701846 | 125707764 | Homo_sapiens_6_125703727-125705069-HERVHF      | -                 | 6    |     |
|   | 125575411 | 125749395 | NONHSAT252667.1                                | -                 | 5918 |     |
| 6 | 125701846 | 125702300 | Homo_sapiens_6_125703727-125705069-HERVHF-5LTR | -                 |      |     |
|   | 6         | 125575411 | 125749395                                      | NONHSAT252667.1   | -    | 454 |
| 6 | 125702812 | 125704819 | Homo_sapiens_6_125703727-125705069-HERVHF-pol  | -                 | 6    |     |
|   | 125575411 | 125749395 | NONHSAG044767.3                                | -                 | 2007 |     |
| 6 | 125702812 | 125704819 | Homo_sapiens_6_125703727-125705069-HERVHF-pol  | -                 | 6    |     |
|   | 125575411 | 125749395 | NONHSAT252665.1                                | -                 | 2007 |     |
| 6 | 125702812 | 125704819 | Homo_sapiens_6_125703727-125705069-HERVHF-pol  | -                 | 6    |     |

|   |           |           |                                                |   |      |   |
|---|-----------|-----------|------------------------------------------------|---|------|---|
|   | 125575411 | 125749395 | NONHSAT252666.1                                | - | 2007 |   |
| 6 | 125702812 | 125704819 | Homo_sapiens_6_125703727-125705069-HERVHF-pol  | - |      | 6 |
|   | 125575411 | 125749395 | NONHSAT252667.1                                | - | 2007 |   |
| 6 | 125705125 | 125705535 | Homo_sapiens_6_125703727-125705069-HERVHF-gag  | - |      | 6 |
|   | 125575411 | 125749395 | NONHSAG044767.3                                | - | 410  |   |
| 6 | 125705125 | 125705535 | Homo_sapiens_6_125703727-125705069-HERVHF-gag  | - |      | 6 |
|   | 125575411 | 125749395 | NONHSAT252665.1                                | - | 410  |   |
| 6 | 125705125 | 125705535 | Homo_sapiens_6_125703727-125705069-HERVHF-gag  | - |      | 6 |
|   | 125575411 | 125749395 | NONHSAT252666.1                                | - | 410  |   |
| 6 | 125705125 | 125705535 | Homo_sapiens_6_125703727-125705069-HERVHF-gag  | - |      | 6 |
|   | 125575411 | 125749395 | NONHSAT252667.1                                | - | 410  |   |
| 6 | 125707310 | 125707764 | Homo_sapiens_6_125703727-125705069-HERVHF-3LTR | - |      |   |
| 6 | 125575411 | 125749395 | NONHSAG044767.3                                | - | 454  |   |
| 6 | 125707310 | 125707764 | Homo_sapiens_6_125703727-125705069-HERVHF-3LTR | - |      |   |
| 6 | 125575411 | 125749395 | NONHSAT252665.1                                | - | 454  |   |
| 6 | 125707310 | 125707764 | Homo_sapiens_6_125703727-125705069-HERVHF-3LTR | - |      |   |
| 6 | 125575411 | 125749395 | NONHSAT252666.1                                | - | 454  |   |
| 6 | 125707310 | 125707764 | Homo_sapiens_6_125703727-125705069-HERVHF-3LTR | - |      |   |
| 6 | 125575411 | 125749395 | NONHSAT252667.1                                | - | 454  |   |
| 6 | 125701846 | 125707764 | Homo_sapiens_6_125703727-125705069-HERVHF      | - |      | 6 |
|   | 125577545 | 125749180 | ENSG00000237742                                | - | 5918 |   |
| 6 | 125701846 | 125702300 | Homo_sapiens_6_125703727-125705069-HERVHF-5LTR | - |      |   |
| 6 | 125577545 | 125749180 | ENSG00000237742                                | - | 454  |   |
| 6 | 125702812 | 125704819 | Homo_sapiens_6_125703727-125705069-HERVHF-pol  | - |      | 6 |
|   | 125577545 | 125749180 | ENSG00000237742                                | - | 2007 |   |
| 6 | 125705125 | 125705535 | Homo_sapiens_6_125703727-125705069-HERVHF-gag  | - |      | 6 |
|   | 125577545 | 125749180 | ENSG00000237742                                | - | 410  |   |
| 6 | 125707310 | 125707764 | Homo_sapiens_6_125703727-125705069-HERVHF-3LTR | - |      |   |
| 6 | 125577545 | 125749180 | ENSG00000237742                                | - | 454  |   |
| 6 | 125701846 | 125707764 | Homo_sapiens_6_125703727-125705069-HERVHF      | - |      | 6 |
|   | 125577575 | 125745622 | NONHSAT252668.1                                | - | 5918 |   |
| 6 | 125701846 | 125702300 | Homo_sapiens_6_125703727-125705069-HERVHF-5LTR | - |      |   |
| 6 | 125577575 | 125745622 | NONHSAT252668.1                                | - | 454  |   |
| 6 | 125702812 | 125704819 | Homo_sapiens_6_125703727-125705069-HERVHF-pol  | - |      | 6 |
|   | 125577575 | 125745622 | NONHSAT252668.1                                | - | 2007 |   |
| 6 | 125705125 | 125705535 | Homo_sapiens_6_125703727-125705069-HERVHF-gag  | - |      | 6 |
|   | 125577575 | 125745622 | NONHSAT252668.1                                | - | 410  |   |
| 6 | 125707310 | 125707764 | Homo_sapiens_6_125703727-125705069-HERVHF-3LTR | - |      |   |
| 6 | 125577575 | 125745622 | NONHSAT252668.1                                | - | 454  |   |
| 6 | 125701846 | 125707764 | Homo_sapiens_6_125703727-125705069-HERVHF      | - |      | 6 |
|   | 125578557 | 125745622 | NONHSAT209650.1                                | - | 5918 |   |
| 6 | 125701846 | 125702300 | Homo_sapiens_6_125703727-125705069-HERVHF-5LTR | - |      |   |
| 6 | 125578557 | 125745622 | NONHSAT209650.1                                | - | 454  |   |
| 6 | 125702812 | 125704819 | Homo_sapiens_6_125703727-125705069-HERVHF-pol  | - |      | 6 |

|   |           |           |                                                |   |      |  |
|---|-----------|-----------|------------------------------------------------|---|------|--|
|   | 125578557 | 125745622 | NONHSAT209650.1                                | - | 2007 |  |
| 6 | 125705125 | 125705535 | Homo_sapiens_6_125703727-125705069-HERVHF-gag  | - | 6    |  |
|   | 125578557 | 125745622 | NONHSAT209650.1                                | - | 410  |  |
| 6 | 125707310 | 125707764 | Homo_sapiens_6_125703727-125705069-HERVHF-3LTR | - |      |  |
| 6 | 125578557 | 125745622 | NONHSAT209650.1                                | - | 454  |  |
| 6 | 125701846 | 125707764 | Homo_sapiens_6_125703727-125705069-HERVHF      | - | 6    |  |
|   | 125578558 | 125745610 | ENSG00000237742                                | - | 5918 |  |
| 6 | 125701846 | 125702300 | Homo_sapiens_6_125703727-125705069-HERVHF-5LTR | - |      |  |
| 6 | 125578558 | 125745610 | ENSG00000237742                                | - | 454  |  |
| 6 | 125701846 | 125707764 | Homo_sapiens_6_125703727-125705069-HERVHF      | - | 6    |  |
|   | 125578558 | 125749097 | NONHSAT209651.1                                | - | 5918 |  |
| 6 | 125701846 | 125702300 | Homo_sapiens_6_125703727-125705069-HERVHF-5LTR | - |      |  |
| 6 | 125578558 | 125749097 | NONHSAT209651.1                                | - | 454  |  |
| 6 | 125702812 | 125704819 | Homo_sapiens_6_125703727-125705069-HERVHF-pol  | - | 6    |  |
|   | 125578558 | 125745610 | ENSG00000237742                                | - | 2007 |  |
| 6 | 125702812 | 125704819 | Homo_sapiens_6_125703727-125705069-HERVHF-pol  | - | 6    |  |
|   | 125578558 | 125749097 | NONHSAT209651.1                                | - | 2007 |  |
| 6 | 125705125 | 125705535 | Homo_sapiens_6_125703727-125705069-HERVHF-gag  | - | 6    |  |
|   | 125578558 | 125745610 | ENSG00000237742                                | - | 410  |  |
| 6 | 125705125 | 125705535 | Homo_sapiens_6_125703727-125705069-HERVHF-gag  | - | 6    |  |
|   | 125578558 | 125749097 | NONHSAT209651.1                                | - | 410  |  |
| 6 | 125707310 | 125707764 | Homo_sapiens_6_125703727-125705069-HERVHF-3LTR | - |      |  |
| 6 | 125578558 | 125745610 | ENSG00000237742                                | - | 454  |  |
| 6 | 125707310 | 125707764 | Homo_sapiens_6_125703727-125705069-HERVHF-3LTR | - |      |  |
| 6 | 125578558 | 125749097 | NONHSAT209651.1                                | - | 454  |  |
| 6 | 125701846 | 125707764 | Homo_sapiens_6_125703727-125705069-HERVHF      | - | 6    |  |
|   | 125578566 | 125745028 | NONHSAT114802.2-                               | - | 5918 |  |
| 6 | 125701846 | 125702300 | Homo_sapiens_6_125703727-125705069-HERVHF-5LTR | - |      |  |
| 6 | 125578566 | 125745028 | NONHSAT114802.2-                               | - | 454  |  |
| 6 | 125701846 | 125707764 | Homo_sapiens_6_125703727-125705069-HERVHF      | - | 6    |  |
|   | 125578566 | 125749186 | NONHSAT114803.2-                               | - | 5918 |  |
| 6 | 125701846 | 125702300 | Homo_sapiens_6_125703727-125705069-HERVHF-5LTR | - |      |  |
| 6 | 125578566 | 125749186 | NONHSAT114803.2-                               | - | 454  |  |
| 6 | 125701846 | 125707764 | Homo_sapiens_6_125703727-125705069-HERVHF      | - | 6    |  |
|   | 125578566 | 125745622 | NONHSAT209652.1                                | - | 5918 |  |
| 6 | 125701846 | 125702300 | Homo_sapiens_6_125703727-125705069-HERVHF-5LTR | - |      |  |
| 6 | 125578566 | 125745622 | NONHSAT209652.1                                | - | 454  |  |
| 6 | 125701846 | 125707764 | Homo_sapiens_6_125703727-125705069-HERVHF      | - | 6    |  |
|   | 125578566 | 125749186 | NONHSAT209653.1                                | - | 5918 |  |
| 6 | 125701846 | 125702300 | Homo_sapiens_6_125703727-125705069-HERVHF-5LTR | - |      |  |
| 6 | 125578566 | 125749186 | NONHSAT209653.1                                | - | 454  |  |
| 6 | 125702812 | 125704819 | Homo_sapiens_6_125703727-125705069-HERVHF-pol  | - | 6    |  |
|   | 125578566 | 125745028 | NONHSAT114802.2-                               | - | 2007 |  |
| 6 | 125702812 | 125704819 | Homo_sapiens_6_125703727-125705069-HERVHF-pol  | - | 6    |  |

|   |           |           |                                                |        |   |
|---|-----------|-----------|------------------------------------------------|--------|---|
|   | 125578566 | 125749186 | NONHSAT114803.2-                               | 2007   |   |
| 6 | 125702812 | 125704819 | Homo_sapiens_6_125703727-125705069-HERVHF-pol  | -      | 6 |
|   | 125578566 | 125745622 | NONHSAT209652.1                                | - 2007 |   |
| 6 | 125702812 | 125704819 | Homo_sapiens_6_125703727-125705069-HERVHF-pol  | -      | 6 |
|   | 125578566 | 125749186 | NONHSAT209653.1                                | - 2007 |   |
| 6 | 125705125 | 125705535 | Homo_sapiens_6_125703727-125705069-HERVHF-gag  | -      | 6 |
|   | 125578566 | 125745028 | NONHSAT114802.2-                               | 410    |   |
| 6 | 125705125 | 125705535 | Homo_sapiens_6_125703727-125705069-HERVHF-gag  | -      | 6 |
|   | 125578566 | 125749186 | NONHSAT114803.2-                               | 410    |   |
| 6 | 125705125 | 125705535 | Homo_sapiens_6_125703727-125705069-HERVHF-gag  | -      | 6 |
|   | 125578566 | 125745622 | NONHSAT209652.1                                | - 410  |   |
| 6 | 125705125 | 125705535 | Homo_sapiens_6_125703727-125705069-HERVHF-gag  | -      | 6 |
|   | 125578566 | 125749186 | NONHSAT209653.1                                | - 410  |   |
| 6 | 125707310 | 125707764 | Homo_sapiens_6_125703727-125705069-HERVHF-3LTR | -      |   |
| 6 | 125578566 | 125745028 | NONHSAT114802.2-                               | 454    |   |
| 6 | 125707310 | 125707764 | Homo_sapiens_6_125703727-125705069-HERVHF-3LTR | -      |   |
| 6 | 125578566 | 125749186 | NONHSAT114803.2-                               | 454    |   |
| 6 | 125707310 | 125707764 | Homo_sapiens_6_125703727-125705069-HERVHF-3LTR | -      |   |
| 6 | 125578566 | 125745622 | NONHSAT209652.1                                | - 454  |   |
| 6 | 125707310 | 125707764 | Homo_sapiens_6_125703727-125705069-HERVHF-3LTR | -      |   |
| 6 | 125578566 | 125749186 | NONHSAT209653.1                                | - 454  |   |
| 6 | 125701846 | 125707764 | Homo_sapiens_6_125703727-125705069-HERVHF      | -      | 6 |
|   | 125578567 | 125745028 | ENSG00000237742                                | - 5918 |   |
| 6 | 125701846 | 125702300 | Homo_sapiens_6_125703727-125705069-HERVHF-5LTR | -      |   |
| 6 | 125578567 | 125745028 | ENSG00000237742                                | - 454  |   |
| 6 | 125701846 | 125707764 | Homo_sapiens_6_125703727-125705069-HERVHF      | -      | 6 |
|   | 125578567 | 125749186 | ENSG00000237742                                | - 5918 |   |
| 6 | 125701846 | 125702300 | Homo_sapiens_6_125703727-125705069-HERVHF-5LTR | -      |   |
| 6 | 125578567 | 125749186 | ENSG00000237742                                | - 454  |   |
| 6 | 125701846 | 125707764 | Homo_sapiens_6_125703727-125705069-HERVHF      | -      | 6 |
|   | 125578567 | 125749187 | NONHSAT209654.1                                | - 5918 |   |
| 6 | 125701846 | 125702300 | Homo_sapiens_6_125703727-125705069-HERVHF-5LTR | -      |   |
| 6 | 125578567 | 125749187 | NONHSAT209654.1                                | - 454  |   |
| 6 | 125702812 | 125704819 | Homo_sapiens_6_125703727-125705069-HERVHF-pol  | -      | 6 |
|   | 125578567 | 125745028 | ENSG00000237742                                | - 2007 |   |
| 6 | 125702812 | 125704819 | Homo_sapiens_6_125703727-125705069-HERVHF-pol  | -      | 6 |
|   | 125578567 | 125749186 | ENSG00000237742                                | - 2007 |   |
| 6 | 125702812 | 125704819 | Homo_sapiens_6_125703727-125705069-HERVHF-pol  | -      | 6 |
|   | 125578567 | 125749187 | NONHSAT209654.1                                | - 2007 |   |
| 6 | 125705125 | 125705535 | Homo_sapiens_6_125703727-125705069-HERVHF-gag  | -      | 6 |
|   | 125578567 | 125745028 | ENSG00000237742                                | - 410  |   |
| 6 | 125705125 | 125705535 | Homo_sapiens_6_125703727-125705069-HERVHF-gag  | -      | 6 |
|   | 125578567 | 125749186 | ENSG00000237742                                | - 410  |   |
| 6 | 125705125 | 125705535 | Homo_sapiens_6_125703727-125705069-HERVHF-gag  | -      | 6 |

|   |           |           |                                                |                 |      |     |
|---|-----------|-----------|------------------------------------------------|-----------------|------|-----|
|   | 125578567 | 125749187 | NONHSAT209654.1                                | -               | 410  |     |
| 6 | 125707310 | 125707764 | Homo_sapiens_6_125703727-125705069-HERVHF-3LTR | -               |      |     |
|   | 6         | 125578567 | 125745028                                      | ENSG00000237742 | -    | 454 |
| 6 | 125707310 | 125707764 | Homo_sapiens_6_125703727-125705069-HERVHF-3LTR | -               |      |     |
|   | 6         | 125578567 | 125749186                                      | ENSG00000237742 | -    | 454 |
| 6 | 125707310 | 125707764 | Homo_sapiens_6_125703727-125705069-HERVHF-3LTR | -               |      |     |
|   | 6         | 125578567 | 125749187                                      | NONHSAT209654.1 | -    | 454 |
| 6 | 125701846 | 125707764 | Homo_sapiens_6_125703727-125705069-HERVHF      | -               |      | 6   |
|   | 125686162 | 125749395 | NONHSAT252669.1                                | -               | 5918 |     |
| 6 | 125701846 | 125702300 | Homo_sapiens_6_125703727-125705069-HERVHF-5LTR | -               |      |     |
|   | 6         | 125686162 | 125749395                                      | NONHSAT252669.1 | -    | 454 |
| 6 | 125702812 | 125704819 | Homo_sapiens_6_125703727-125705069-HERVHF-pol  | -               |      | 6   |
|   | 125686162 | 125749395 | NONHSAT252669.1                                | -               | 2007 |     |
| 6 | 125705125 | 125705535 | Homo_sapiens_6_125703727-125705069-HERVHF-gag  | -               |      | 6   |
|   | 125686162 | 125749395 | NONHSAT252669.1                                | -               | 410  |     |
| 6 | 125707310 | 125707764 | Homo_sapiens_6_125703727-125705069-HERVHF-3LTR | -               |      |     |
|   | 6         | 125686162 | 125749395                                      | NONHSAT252669.1 | -    | 454 |
| 6 | 126851224 | 126852054 | Homo_sapiens_6_126851273-126852794-HERVHF-pro  | +               |      | 6   |
|   | 126851010 | 126882099 | NONHSAG044785.3                                | +               | 830  |     |
| 6 | 126851224 | 126852054 | Homo_sapiens_6_126851273-126852794-HERVHF-pro  | +               |      | 6   |
|   | 126851010 | 126882099 | NONHSAT251492.1                                | +               | 830  |     |
| 6 | 126851557 | 126853403 | Homo_sapiens_6_126851273-126852794-HERVHF-pol  | +               |      | 6   |
|   | 126851010 | 126882099 | NONHSAG044785.3                                | +               | 1846 |     |
| 6 | 126851557 | 126853403 | Homo_sapiens_6_126851273-126852794-HERVHF-pol  | +               |      | 6   |
|   | 126851010 | 126882099 | NONHSAT251492.1                                | +               | 1846 |     |
| 6 | 126854026 | 126854456 | Homo_sapiens_6_126851273-126852794-HERVHF-3LTR | +               |      |     |
|   | 6         | 126851010 | 126882099                                      | NONHSAG044785.3 | +    | 430 |
| 6 | 126854026 | 126854456 | Homo_sapiens_6_126851273-126852794-HERVHF-3LTR | +               |      |     |
|   | 6         | 126851010 | 126882099                                      | NONHSAT251492.1 | +    | 430 |
| 6 | 131295347 | 131301206 | Homo_sapiens_6_131297975-131299503-HERVHF      | +               |      | 6   |
|   | 131294420 | 131348082 | NONHSAG093612.2                                | +               | 5859 |     |
| 6 | 131295347 | 131295808 | Homo_sapiens_6_131297975-131299503-HERVHF-5LTR | +               |      |     |
|   | 6         | 131294420 | 131348082                                      | NONHSAG093612.2 | +    | 461 |
| 6 | 131295347 | 131301206 | Homo_sapiens_6_131297975-131299503-HERVHF      | +               |      | 6   |
|   | 131294420 | 131301790 | NONHSAT251499.1                                | +               | 5859 |     |
| 6 | 131295347 | 131295808 | Homo_sapiens_6_131297975-131299503-HERVHF-5LTR | +               |      |     |
|   | 6         | 131294420 | 131301790                                      | NONHSAT251499.1 | +    | 461 |
| 6 | 131295347 | 131301206 | Homo_sapiens_6_131297975-131299503-HERVHF      | +               |      | 6   |
|   | 131294420 | 131309129 | NONHSAT251500.1                                | +               | 5859 |     |
| 6 | 131295347 | 131295808 | Homo_sapiens_6_131297975-131299503-HERVHF-5LTR | +               |      |     |
|   | 6         | 131294420 | 131309129                                      | NONHSAT251500.1 | +    | 461 |
| 6 | 131295347 | 131301206 | Homo_sapiens_6_131297975-131299503-HERVHF      | +               |      | 6   |
|   | 131294420 | 131319640 | NONHSAT251501.1                                | +               | 5859 |     |
| 6 | 131295347 | 131295808 | Homo_sapiens_6_131297975-131299503-HERVHF-5LTR | +               |      |     |

|   |           |           |                                                |   |      |  |
|---|-----------|-----------|------------------------------------------------|---|------|--|
| 6 | 131294420 | 131319640 | NONHSAT251501.1                                | + | 461  |  |
| 6 | 131295347 | 131301206 | Homo_sapiens_6_131297975-131299503-HERVHF      | + | 6    |  |
|   | 131294420 | 131328725 | NONHSAT251502.1                                | + | 5859 |  |
| 6 | 131295347 | 131295808 | Homo_sapiens_6_131297975-131299503-HERVHF-5LTR | + |      |  |
| 6 | 131294420 | 131328725 | NONHSAT251502.1                                | + | 461  |  |
| 6 | 131295347 | 131301206 | Homo_sapiens_6_131297975-131299503-HERVHF      | + | 6    |  |
|   | 131294420 | 131344687 | NONHSAT251503.1                                | + | 5859 |  |
| 6 | 131295347 | 131295808 | Homo_sapiens_6_131297975-131299503-HERVHF-5LTR | + |      |  |
| 6 | 131294420 | 131344687 | NONHSAT251503.1                                | + | 461  |  |
| 6 | 131298228 | 131299742 | Homo_sapiens_6_131297975-131299503-HERVHF-pol  | + | 6    |  |
|   | 131294420 | 131348082 | NONHSAG093612.2                                | + | 1514 |  |
| 6 | 131298228 | 131299742 | Homo_sapiens_6_131297975-131299503-HERVHF-pol  | + | 6    |  |
|   | 131294420 | 131301790 | NONHSAT251499.1                                | + | 1514 |  |
| 6 | 131298228 | 131299742 | Homo_sapiens_6_131297975-131299503-HERVHF-pol  | + | 6    |  |
|   | 131294420 | 131309129 | NONHSAT251500.1                                | + | 1514 |  |
| 6 | 131298228 | 131299742 | Homo_sapiens_6_131297975-131299503-HERVHF-pol  | + | 6    |  |
|   | 131294420 | 131319640 | NONHSAT251501.1                                | + | 1514 |  |
| 6 | 131298228 | 131299742 | Homo_sapiens_6_131297975-131299503-HERVHF-pol  | + | 6    |  |
|   | 131294420 | 131328725 | NONHSAT251502.1                                | + | 1514 |  |
| 6 | 131298228 | 131299742 | Homo_sapiens_6_131297975-131299503-HERVHF-pol  | + | 6    |  |
|   | 131294420 | 131344687 | NONHSAT251503.1                                | + | 1514 |  |
| 6 | 131300740 | 131301206 | Homo_sapiens_6_131297975-131299503-HERVHF-3LTR | + |      |  |
| 6 | 131294420 | 131348082 | NONHSAG093612.2                                | + | 466  |  |
| 6 | 131300740 | 131301206 | Homo_sapiens_6_131297975-131299503-HERVHF-3LTR | + |      |  |
| 6 | 131294420 | 131301790 | NONHSAT251499.1                                | + | 466  |  |
| 6 | 131300740 | 131301206 | Homo_sapiens_6_131297975-131299503-HERVHF-3LTR | + |      |  |
| 6 | 131294420 | 131309129 | NONHSAT251500.1                                | + | 466  |  |
| 6 | 131300740 | 131301206 | Homo_sapiens_6_131297975-131299503-HERVHF-3LTR | + |      |  |
| 6 | 131294420 | 131319640 | NONHSAT251501.1                                | + | 466  |  |
| 6 | 131300740 | 131301206 | Homo_sapiens_6_131297975-131299503-HERVHF-3LTR | + |      |  |
| 6 | 131294420 | 131328725 | NONHSAT251502.1                                | + | 466  |  |
| 6 | 131300740 | 131301206 | Homo_sapiens_6_131297975-131299503-HERVHF-3LTR | + |      |  |
| 6 | 131294420 | 131344687 | NONHSAT251503.1                                | + | 466  |  |
| 6 | 131338799 | 131344566 | Homo_sapiens_6_131340338-131342739-HERVHF      | + | 6    |  |
|   | 131294420 | 131348082 | NONHSAG093612.2                                | + | 5767 |  |
| 6 | 131338799 | 131339252 | Homo_sapiens_6_131340338-131342739-HERVHF-5LTR | + |      |  |
| 6 | 131294420 | 131348082 | NONHSAG093612.2                                | + | 453  |  |
| 6 | 131338799 | 131344566 | Homo_sapiens_6_131340338-131342739-HERVHF      | + | 6    |  |
|   | 131294420 | 131344687 | NONHSAT251503.1                                | + | 5767 |  |
| 6 | 131338799 | 131339252 | Homo_sapiens_6_131340338-131342739-HERVHF-5LTR | + |      |  |
| 6 | 131294420 | 131344687 | NONHSAT251503.1                                | + | 453  |  |
| 6 | 131340935 | 131341324 | Homo_sapiens_6_131340338-131342739-HERVHF-gag  | + | 6    |  |
|   | 131294420 | 131348082 | NONHSAG093612.2                                | + | 389  |  |
| 6 | 131340935 | 131341324 | Homo_sapiens_6_131340338-131342739-HERVHF-gag  | + | 6    |  |

|   |           |           |                                                |      |      |  |
|---|-----------|-----------|------------------------------------------------|------|------|--|
|   | 131294420 | 131344687 | NONHSAT251503.1                                | +    | 389  |  |
| 6 | 131341378 | 131342177 | Homo_sapiens_6_131340338-131342739-HERVHF-pro  | +    | 6    |  |
|   | 131294420 | 131348082 | NONHSAG093612.2                                | +    | 799  |  |
| 6 | 131341378 | 131342177 | Homo_sapiens_6_131340338-131342739-HERVHF-pro  | +    | 6    |  |
|   | 131294420 | 131344687 | NONHSAT251503.1                                | +    | 799  |  |
| 6 | 131341770 | 131343672 | Homo_sapiens_6_131340338-131342739-HERVHF-pol  | +    | 6    |  |
|   | 131294420 | 131348082 | NONHSAG093612.2                                | +    | 1902 |  |
| 6 | 131341770 | 131343672 | Homo_sapiens_6_131340338-131342739-HERVHF-pol  | +    | 6    |  |
|   | 131294420 | 131344687 | NONHSAT251503.1                                | +    | 1902 |  |
| 6 | 131344112 | 131344566 | Homo_sapiens_6_131340338-131342739-HERVHF-3LTR | +    |      |  |
| 6 | 131294420 | 131348082 | NONHSAG093612.2                                | +    | 454  |  |
| 6 | 131344112 | 131344566 | Homo_sapiens_6_131340338-131342739-HERVHF-3LTR | +    |      |  |
| 6 | 131294420 | 131344687 | NONHSAT251503.1                                | +    | 454  |  |
| 6 | 131298228 | 131299742 | Homo_sapiens_6_131297975-131299503-HERVHF-pol  | +    | 6    |  |
|   | 131298073 | 131309274 | NONHSAT114915.2+                               | 1514 |      |  |
| 6 | 131300740 | 131301206 | Homo_sapiens_6_131297975-131299503-HERVHF-3LTR | +    |      |  |
| 6 | 131298073 | 131309274 | NONHSAT114915.2+                               | 466  |      |  |
| 6 | 131338799 | 131344566 | Homo_sapiens_6_131340338-131342739-HERVHF      | +    | 6    |  |
|   | 131324550 | 131348082 | NONHSAT208028.1                                | +    | 5767 |  |
| 6 | 131338799 | 131339252 | Homo_sapiens_6_131340338-131342739-HERVHF-5LTR | +    |      |  |
| 6 | 131324550 | 131348082 | NONHSAT208028.1                                | +    | 453  |  |
| 6 | 131340935 | 131341324 | Homo_sapiens_6_131340338-131342739-HERVHF-gag  | +    | 6    |  |
|   | 131324550 | 131348082 | NONHSAT208028.1                                | +    | 389  |  |
| 6 | 131341378 | 131342177 | Homo_sapiens_6_131340338-131342739-HERVHF-pro  | +    | 6    |  |
|   | 131324550 | 131348082 | NONHSAT208028.1                                | +    | 799  |  |
| 6 | 131341770 | 131343672 | Homo_sapiens_6_131340338-131342739-HERVHF-pol  | +    | 6    |  |
|   | 131324550 | 131348082 | NONHSAT208028.1                                | +    | 1902 |  |
| 6 | 131344112 | 131344566 | Homo_sapiens_6_131340338-131342739-HERVHF-3LTR | +    |      |  |
| 6 | 131324550 | 131348082 | NONHSAT208028.1                                | +    | 454  |  |
| 6 | 131903830 | 131904159 | Homo_sapiens_6_131904209-131905555-HERVHF-gag  | +    | 6    |  |
|   | 131901962 | 131920565 | NONHSAG044846.2                                | +    | 329  |  |
| 6 | 131903830 | 131904159 | Homo_sapiens_6_131904209-131905555-HERVHF-gag  | +    | 6    |  |
|   | 131901962 | 131920565 | NONHSAT114930.2+                               | 329  |      |  |
| 6 | 131904166 | 131904993 | Homo_sapiens_6_131904209-131905555-HERVHF-pro  | +    | 6    |  |
|   | 131901962 | 131920565 | NONHSAG044846.2                                | +    | 827  |  |
| 6 | 131904166 | 131904993 | Homo_sapiens_6_131904209-131905555-HERVHF-pro  | +    | 6    |  |
|   | 131901962 | 131920565 | NONHSAT114930.2+                               | 827  |      |  |
| 6 | 131904451 | 131906364 | Homo_sapiens_6_131904209-131905555-HERVHF-pol  | +    | 6    |  |
|   | 131901962 | 131920565 | NONHSAG044846.2                                | +    | 1913 |  |
| 6 | 131904451 | 131906364 | Homo_sapiens_6_131904209-131905555-HERVHF-pol  | +    | 6    |  |
|   | 131901962 | 131920565 | NONHSAT114930.2+                               | 1913 |      |  |
| 6 | 131906969 | 131907420 | Homo_sapiens_6_131904209-131905555-HERVHF-3LTR | +    |      |  |
| 6 | 131901962 | 131920565 | NONHSAG044846.2                                | +    | 451  |  |
| 6 | 131906969 | 131907420 | Homo_sapiens_6_131904209-131905555-HERVHF-3LTR | +    |      |  |



|   |           |           |                                                 |      |      |
|---|-----------|-----------|-------------------------------------------------|------|------|
| 6 | 131901962 | 131920565 | NONHSAT114930.2+                                | 451  |      |
| 6 | 131903830 | 131904159 | Homo_sapiens_6_131904209-131905555-HERVHF-gag + | 6    |      |
|   | 131901963 | 131920565 | ENSG00000236673 +                               | 329  |      |
| 6 | 131903830 | 131904159 | Homo_sapiens_6_131904209-131905555-HERVHF-gag + | 6    |      |
|   | 131901963 | 131907530 | NONHSAT114931.2+                                | 329  |      |
| 6 | 131904166 | 131904993 | Homo_sapiens_6_131904209-131905555-HERVHF-pro + | 6    |      |
|   | 131901963 | 131920565 | ENSG00000236673 +                               | 827  |      |
| 6 | 131904166 | 131904993 | Homo_sapiens_6_131904209-131905555-HERVHF-pro + | 6    |      |
|   | 131901963 | 131907530 | NONHSAT114931.2+                                | 827  |      |
| 6 | 131904451 | 131906364 | Homo_sapiens_6_131904209-131905555-HERVHF-pol + | 6    |      |
|   | 131901963 | 131920565 | ENSG00000236673 +                               | 1913 |      |
| 6 | 131904451 | 131906364 | Homo_sapiens_6_131904209-131905555-HERVHF-pol + | 6    |      |
|   | 131901963 | 131907530 | NONHSAT114931.2+                                | 1913 |      |
| 6 | 131906969 | 131907420 | Homo_sapiens_6_131904209-131905555-HERVHF-3LTR  | +    |      |
| 6 | 131901963 | 131920565 | ENSG00000236673 +                               | 451  |      |
| 6 | 131906969 | 131907420 | Homo_sapiens_6_131904209-131905555-HERVHF-3LTR  | +    |      |
| 6 | 131901963 | 131907530 | NONHSAT114931.2+                                | 451  |      |
| 6 | 131903830 | 131904159 | Homo_sapiens_6_131904209-131905555-HERVHF-gag + | 6    |      |
|   | 131901964 | 131907530 | ENSG00000236673 +                               | 329  |      |
| 6 | 131904166 | 131904993 | Homo_sapiens_6_131904209-131905555-HERVHF-pro + | 6    |      |
|   | 131901964 | 131907530 | ENSG00000236673 +                               | 827  |      |
| 6 | 131904451 | 131906364 | Homo_sapiens_6_131904209-131905555-HERVHF-pol + | 6    |      |
|   | 131901964 | 131907530 | ENSG00000236673 +                               | 1913 |      |
| 6 | 131906969 | 131907420 | Homo_sapiens_6_131904209-131905555-HERVHF-3LTR  | +    |      |
| 6 | 131901964 | 131907530 | ENSG00000236673 +                               | 451  |      |
| 6 | 131903830 | 131904159 | Homo_sapiens_6_131904209-131905555-HERVHF-gag + | 6    |      |
|   | 131903647 | 131907530 | NONHSAT114932.2+                                | 329  |      |
| 6 | 131904166 | 131904993 | Homo_sapiens_6_131904209-131905555-HERVHF-pro + | 6    |      |
|   | 131903647 | 131907530 | NONHSAT114932.2+                                | 827  |      |
| 6 | 131904451 | 131906364 | Homo_sapiens_6_131904209-131905555-HERVHF-pol + | 6    |      |
|   | 131903647 | 131907530 | NONHSAT114932.2+                                | 1913 |      |
| 6 | 131906969 | 131907420 | Homo_sapiens_6_131904209-131905555-HERVHF-3LTR  | +    |      |
| 6 | 131903647 | 131907530 | NONHSAT114932.2+                                | 451  |      |
| 6 | 131903830 | 131904159 | Homo_sapiens_6_131904209-131905555-HERVHF-gag + | 6    |      |
|   | 131903648 | 131907530 | ENSG00000236673 +                               | 329  |      |
| 6 | 131904166 | 131904993 | Homo_sapiens_6_131904209-131905555-HERVHF-pro + | 6    |      |
|   | 131903648 | 131907530 | ENSG00000236673 +                               | 827  |      |
| 6 | 131904451 | 131906364 | Homo_sapiens_6_131904209-131905555-HERVHF-pol + | 6    |      |
|   | 131903648 | 131907530 | ENSG00000236673 +                               | 1913 |      |
| 6 | 131906969 | 131907420 | Homo_sapiens_6_131904209-131905555-HERVHF-3LTR  | +    |      |
| 6 | 131903648 | 131907530 | ENSG00000236673 +                               | 451  |      |
| 6 | 144923164 | 144928866 | Homo_sapiens_6_144925698-144927040-HERVHF       | +    | 6    |
|   | 144922305 | 144930077 | NONHSAG095837.2                                 | +    | 5702 |
| 6 | 144923164 | 144923609 | Homo_sapiens_6_144925698-144927040-HERVHF-5LTR  | +    |      |

|   |           |           |                                                |      |      |          |
|---|-----------|-----------|------------------------------------------------|------|------|----------|
| 6 | 144922305 | 144930077 | NONHSAG095837.2                                | +    | 445  |          |
| 6 | 144925945 | 144927834 | Homo_sapiens_6_144925698-144927040-HERVHF-pol  | +    | 6    |          |
|   | 144922305 | 144930077 | NONHSAG095837.2                                | +    | 1889 |          |
| 6 | 144928414 | 144928866 | Homo_sapiens_6_144925698-144927040-HERVHF-3LTR | +    |      |          |
| 6 | 144922305 | 144930077 | NONHSAG095837.2                                | +    | 452  |          |
| 6 | 144923164 | 144923609 | Homo_sapiens_6_144925698-144927040-HERVHF-5LTR | +    |      |          |
| 6 | 144922314 | 144926487 | NONHSAT251624.1                                | +    | 445  |          |
| 6 | 144923164 | 144923609 | Homo_sapiens_6_144925698-144927040-HERVHF-5LTR | +    |      |          |
| 6 | 144922314 | 144928748 | NONHSAT251625.1                                | +    | 445  |          |
| 6 | 144923164 | 144928866 | Homo_sapiens_6_144925698-144927040-HERVHF      | +    | 6    |          |
|   | 144922314 | 144929082 | NONHSAT251626.1                                | +    | 5702 |          |
| 6 | 144923164 | 144923609 | Homo_sapiens_6_144925698-144927040-HERVHF-5LTR | +    |      |          |
| 6 | 144922314 | 144929082 | NONHSAT251626.1                                | +    | 445  |          |
| 6 | 144923164 | 144928866 | Homo_sapiens_6_144925698-144927040-HERVHF      | +    | 6    |          |
|   | 144922314 | 144929082 | NONHSAT251627.1                                | +    | 5702 |          |
| 6 | 144923164 | 144923609 | Homo_sapiens_6_144925698-144927040-HERVHF-5LTR | +    |      |          |
| 6 | 144922314 | 144929082 | NONHSAT251627.1                                | +    | 445  |          |
| 6 | 144923164 | 144928866 | Homo_sapiens_6_144925698-144927040-HERVHF      | +    | 6    |          |
|   | 144922314 | 144929880 | NONHSAT251628.1                                | +    | 5702 |          |
| 6 | 144923164 | 144923609 | Homo_sapiens_6_144925698-144927040-HERVHF-5LTR | +    |      |          |
| 6 | 144922314 | 144929880 | NONHSAT251628.1                                | +    | 445  |          |
| 6 | 144925945 | 144927834 | Homo_sapiens_6_144925698-144927040-HERVHF-pol  | +    | 6    |          |
|   | 144922314 | 144928748 | NONHSAT251625.1                                | +    | 1889 |          |
| 6 | 144925945 | 144927834 | Homo_sapiens_6_144925698-144927040-HERVHF-pol  | +    | 6    |          |
|   | 144922314 | 144929082 | NONHSAT251626.1                                | +    | 1889 |          |
| 6 | 144925945 | 144927834 | Homo_sapiens_6_144925698-144927040-HERVHF-pol  | +    | 6    |          |
|   | 144922314 | 144929082 | NONHSAT251627.1                                | +    | 1889 |          |
| 6 | 144925945 | 144927834 | Homo_sapiens_6_144925698-144927040-HERVHF-pol  | +    | 6    |          |
|   | 144922314 | 144929880 | NONHSAT251628.1                                | +    | 1889 |          |
| 6 | 144928414 | 144928866 | Homo_sapiens_6_144925698-144927040-HERVHF-3LTR | +    |      |          |
| 6 | 144922314 | 144929082 | NONHSAT251626.1                                | +    | 452  |          |
| 6 | 144928414 | 144928866 | Homo_sapiens_6_144925698-144927040-HERVHF-3LTR | +    |      |          |
| 6 | 144922314 | 144929082 | NONHSAT251627.1                                | +    | 452  |          |
| 6 | 144928414 | 144928866 | Homo_sapiens_6_144925698-144927040-HERVHF-3LTR | +    |      |          |
| 6 | 144922314 | 144929880 | NONHSAT251628.1                                | +    | 452  |          |
| 6 | 144925945 | 144927834 | Homo_sapiens_6_144925698-144927040-HERVHF-pol  | +    | 6    |          |
|   | 144923387 | 144930077 | NONHSAT208190.1                                | +    | 1889 |          |
| 6 | 144928414 | 144928866 | Homo_sapiens_6_144925698-144927040-HERVHF-3LTR | +    |      |          |
| 6 | 144923387 | 144930077 | NONHSAT208190.1                                | +    | 452  |          |
| 6 | 144923164 | 144928866 | Homo_sapiens_6_144925698-144927040-HERVHF      | +    | 6    |          |
|   | 144923586 | 144928835 | NONHSAT115388.2+                               | 5249 |      |          |
| 6 | 144925945 | 144927834 | Homo_sapiens_6_144925698-144927040-HERVHF-pol  | +    | 6    |          |
|   | 144923586 | 144928835 | NONHSAT115388.2+                               | 1889 |      |          |
| 7 | 26024199  | 26029809  | Homo_sapiens_7_26026061-26027405-HERVHF        | -    | 7    | 26018880 |

26130859 NONHSAG047156.2 - 5610

7 26024199 26024639 Homo\_sapiens\_7\_26026061-26027405-HERVHF-5LTR - 7  
26018880 26130859 NONHSAG047156.2 - 440

7 26025479 26027163 Homo\_sapiens\_7\_26026061-26027405-HERVHF-pol - 7  
26018880 26130859 NONHSAG047156.2 - 1684

7 26026567 26027451 Homo\_sapiens\_7\_26026061-26027405-HERVHF-pro - 7  
26018880 26130859 NONHSAG047156.2 - 884

7 26029364 26029809 Homo\_sapiens\_7\_26026061-26027405-HERVHF-3LTR - 7  
26018880 26130859 NONHSAG047156.2 - 445

7 26024199 26029809 Homo\_sapiens\_7\_26026061-26027405-HERVHF - 7 26019503  
26130859 NONHSAT119611.2- 5610

7 26024199 26024639 Homo\_sapiens\_7\_26026061-26027405-HERVHF-5LTR - 7  
26019503 26130859 NONHSAT119611.2- 440

7 26024199 26029809 Homo\_sapiens\_7\_26026061-26027405-HERVHF - 7 26019503  
26130859 NONHSAT119612.2- 5610

7 26024199 26024639 Homo\_sapiens\_7\_26026061-26027405-HERVHF-5LTR - 7  
26019503 26130859 NONHSAT119612.2- 440

7 26025479 26027163 Homo\_sapiens\_7\_26026061-26027405-HERVHF-pol - 7  
26019503 26130859 NONHSAT119611.2- 1684

7 26025479 26027163 Homo\_sapiens\_7\_26026061-26027405-HERVHF-pol - 7  
26019503 26130859 NONHSAT119612.2- 1684

7 26026567 26027451 Homo\_sapiens\_7\_26026061-26027405-HERVHF-pro - 7  
26019503 26130859 NONHSAT119611.2- 884

7 26026567 26027451 Homo\_sapiens\_7\_26026061-26027405-HERVHF-pro - 7  
26019503 26130859 NONHSAT119612.2- 884

7 26029364 26029809 Homo\_sapiens\_7\_26026061-26027405-HERVHF-3LTR - 7  
26019503 26130859 NONHSAT119611.2- 445

7 26029364 26029809 Homo\_sapiens\_7\_26026061-26027405-HERVHF-3LTR - 7  
26019503 26130859 NONHSAT119612.2- 445

7 26025479 26027163 Homo\_sapiens\_7\_26026061-26027405-HERVHF-pol - 7  
26024570 26097303 NONHSAG097003.1 - 1684

7 26025479 26027163 Homo\_sapiens\_7\_26026061-26027405-HERVHF-pol - 7  
26024570 26097303 NONHSAT213299.1 - 1684

7 26026567 26027451 Homo\_sapiens\_7\_26026061-26027405-HERVHF-pro - 7  
26024570 26097303 NONHSAG097003.1 - 884

7 26026567 26027451 Homo\_sapiens\_7\_26026061-26027405-HERVHF-pro - 7  
26024570 26097303 NONHSAT213299.1 - 884

7 26029364 26029809 Homo\_sapiens\_7\_26026061-26027405-HERVHF-3LTR - 7  
26024570 26097303 NONHSAG097003.1 - 445

7 26029364 26029809 Homo\_sapiens\_7\_26026061-26027405-HERVHF-3LTR - 7  
26024570 26097303 NONHSAT213299.1 - 445

7 34300132 34300573 Homo\_sapiens\_7\_34301985-34303122-HERVHF-5LTR - 7  
34298855 34301559 NONHSAG047318.2 - 441

7 34300132 34300573 Homo\_sapiens\_7\_34301985-34303122-HERVHF-5LTR - 7

|   |           |           |                                                |   |     |  |
|---|-----------|-----------|------------------------------------------------|---|-----|--|
|   | 34298855  | 34301559  | NONHSAT120040.2                                | - | 441 |  |
| 7 | 102975230 | 102975898 | Homo_sapiens_7_102976263-102977254-HERVHF-gag  | + | 7   |  |
|   | 102973509 | 102988857 | NONHSAG048439.2                                | + | 668 |  |
| 7 | 102975230 | 102975898 | Homo_sapiens_7_102976263-102977254-HERVHF-gag  | + | 7   |  |
|   | 102973509 | 102988844 | NONHSAT212473.1                                | + | 668 |  |
| 7 | 102976371 | 102977021 | Homo_sapiens_7_102976263-102977254-HERVHF-pro  | + | 7   |  |
|   | 102973509 | 102988857 | NONHSAG048439.2                                | + | 650 |  |
| 7 | 102976371 | 102977021 | Homo_sapiens_7_102976263-102977254-HERVHF-pro  | + | 7   |  |
|   | 102973509 | 102988844 | NONHSAT212473.1                                | + | 650 |  |
| 7 | 102976449 | 102977042 | Homo_sapiens_7_102976263-102977254-HERVHF-pol  | + | 7   |  |
|   | 102973509 | 102988857 | NONHSAG048439.2                                | + | 593 |  |
| 7 | 102976449 | 102977042 | Homo_sapiens_7_102976263-102977254-HERVHF-pol  | + | 7   |  |
|   | 102973509 | 102988844 | NONHSAT212473.1                                | + | 593 |  |
| 7 | 102977224 | 102977607 | Homo_sapiens_7_102976263-102977254-HERVHF-env  | + | 7   |  |
|   | 102973509 | 102988857 | NONHSAG048439.2                                | + | 383 |  |
| 7 | 102977224 | 102977607 | Homo_sapiens_7_102976263-102977254-HERVHF-env  | + | 7   |  |
|   | 102973509 | 102988844 | NONHSAT212473.1                                | + | 383 |  |
| 7 | 102978322 | 102978736 | Homo_sapiens_7_102976263-102977254-HERVHF-3LTR | + |     |  |
| 7 | 102973509 | 102988857 | NONHSAG048439.2                                | + | 414 |  |
| 7 | 102978322 | 102978736 | Homo_sapiens_7_102976263-102977254-HERVHF-3LTR | + |     |  |
| 7 | 102973509 | 102988844 | NONHSAT212473.1                                | + | 414 |  |
| 7 | 102975230 | 102975898 | Homo_sapiens_7_102976263-102977254-HERVHF-gag  | + | 7   |  |
|   | 102973522 | 102988856 | ENSG00000230257                                | + | 668 |  |
| 7 | 102975230 | 102975898 | Homo_sapiens_7_102976263-102977254-HERVHF-gag  | + | 7   |  |
|   | 102973522 | 102988857 | NONHSAT212474.1                                | + | 668 |  |
| 7 | 102976371 | 102977021 | Homo_sapiens_7_102976263-102977254-HERVHF-pro  | + | 7   |  |
|   | 102973522 | 102988856 | ENSG00000230257                                | + | 650 |  |
| 7 | 102976371 | 102977021 | Homo_sapiens_7_102976263-102977254-HERVHF-pro  | + | 7   |  |
|   | 102973522 | 102988857 | NONHSAT212474.1                                | + | 650 |  |
| 7 | 102976449 | 102977042 | Homo_sapiens_7_102976263-102977254-HERVHF-pol  | + | 7   |  |
|   | 102973522 | 102988856 | ENSG00000230257                                | + | 593 |  |
| 7 | 102976449 | 102977042 | Homo_sapiens_7_102976263-102977254-HERVHF-pol  | + | 7   |  |
|   | 102973522 | 102988857 | NONHSAT212474.1                                | + | 593 |  |
| 7 | 102977224 | 102977607 | Homo_sapiens_7_102976263-102977254-HERVHF-env  | + | 7   |  |
|   | 102973522 | 102988856 | ENSG00000230257                                | + | 383 |  |
| 7 | 102977224 | 102977607 | Homo_sapiens_7_102976263-102977254-HERVHF-env  | + | 7   |  |
|   | 102973522 | 102988857 | NONHSAT212474.1                                | + | 383 |  |
| 7 | 102978322 | 102978736 | Homo_sapiens_7_102976263-102977254-HERVHF-3LTR | + |     |  |
| 7 | 102973522 | 102988856 | ENSG00000230257                                | + | 414 |  |
| 7 | 102978322 | 102978736 | Homo_sapiens_7_102976263-102977254-HERVHF-3LTR | + |     |  |
| 7 | 102973522 | 102988857 | NONHSAT212474.1                                | + | 414 |  |
| 7 | 125920130 | 125920885 | Homo_sapiens_7_125920071-125921895-HERVHF-pro  | + | 7   |  |
|   | 125917870 | 125933832 | NONHSAG048705.2                                | + | 755 |  |
| 7 | 125920130 | 125920885 | Homo_sapiens_7_125920071-125921895-HERVHF-pro  | + | 7   |  |

|   |           |           |                                                |      |      |
|---|-----------|-----------|------------------------------------------------|------|------|
|   | 125917870 | 125933832 | NONHSAT123111.2+                               | 755  |      |
| 7 | 125920475 | 125922154 | Homo_sapiens_7_125920071-125921895-HERVHF-pol  | +    | 7    |
|   | 125917870 | 125933832 | NONHSAG048705.2                                | +    | 1679 |
| 7 | 125920475 | 125922154 | Homo_sapiens_7_125920071-125921895-HERVHF-pol  | +    | 7    |
|   | 125917870 | 125933832 | NONHSAT123111.2+                               | 1679 |      |
| 7 | 125923701 | 125924112 | Homo_sapiens_7_125920071-125921895-HERVHF-3LTR | +    |      |
| 7 | 125917870 | 125933832 | NONHSAG048705.2                                | +    | 411  |
| 7 | 125923701 | 125924112 | Homo_sapiens_7_125920071-125921895-HERVHF-3LTR | +    |      |
| 7 | 125917870 | 125933832 | NONHSAT123111.2+                               | 411  |      |
| 7 | 125920130 | 125920885 | Homo_sapiens_7_125920071-125921895-HERVHF-pro  | +    | 7    |
|   | 125917871 | 125933832 | ENSG00000197462                                | +    | 755  |
| 7 | 125920475 | 125922154 | Homo_sapiens_7_125920071-125921895-HERVHF-pol  | +    | 7    |
|   | 125917871 | 125933832 | ENSG00000197462                                | +    | 1679 |
| 7 | 125923701 | 125924112 | Homo_sapiens_7_125920071-125921895-HERVHF-3LTR | +    |      |
| 7 | 125917871 | 125933832 | ENSG00000197462                                | +    | 411  |
| 7 | 155238821 | 155239129 | Homo_sapiens_7_155240740-155241657-HERVK-env   | -    | 7    |
|   | 155238273 | 155254077 | NONHSAG049243.2                                | -    | 308  |
| 7 | 155238821 | 155239129 | Homo_sapiens_7_155240740-155241657-HERVK-env   | -    | 7    |
|   | 155238273 | 155251512 | NONHSAT124357.2                                | -    | 308  |
| 7 | 155239444 | 155241440 | Homo_sapiens_7_155240740-155241657-HERVK-pol   | -    | 7    |
|   | 155238273 | 155254077 | NONHSAG049243.2                                | -    | 1996 |
| 7 | 155239444 | 155241440 | Homo_sapiens_7_155240740-155241657-HERVK-pol   | -    | 7    |
|   | 155238273 | 155251512 | NONHSAT124357.2                                | -    | 1996 |
| 7 | 155241335 | 155242276 | Homo_sapiens_7_155240740-155241657-HERVK-pro   | -    | 7    |
|   | 155238273 | 155254077 | NONHSAG049243.2                                | -    | 941  |
| 7 | 155241335 | 155242276 | Homo_sapiens_7_155240740-155241657-HERVK-pro   | -    | 7    |
|   | 155238273 | 155251512 | NONHSAT124357.2                                | -    | 941  |
| 7 | 155243682 | 155244070 | Homo_sapiens_7_155240740-155241657-HERVK-3LTR  | -    |      |
| 7 | 155238273 | 155254077 | NONHSAG049243.2                                | -    | 388  |
| 7 | 155243682 | 155244070 | Homo_sapiens_7_155240740-155241657-HERVK-3LTR  | -    |      |
| 7 | 155238273 | 155251512 | NONHSAT124357.2                                | -    | 388  |
| 8 | 71676972  | 71677343  | Homo_sapiens_8_71677433-71678968-HERVHF-gag    | +    | 8    |
|   | 71675209  | 71706261  | NONHSAG050489.2                                | +    | 371  |
| 8 | 71676972  | 71677343  | Homo_sapiens_8_71677433-71678968-HERVHF-gag    | +    | 8    |
|   | 71675209  | 71706261  | NONHSAT127188.2                                | +    | 371  |
| 8 | 71677387  | 71678241  | Homo_sapiens_8_71677433-71678968-HERVHF-pro    | +    | 8    |
|   | 71675209  | 71706261  | NONHSAG050489.2                                | +    | 854  |
| 8 | 71677387  | 71678241  | Homo_sapiens_8_71677433-71678968-HERVHF-pro    | +    | 8    |
|   | 71675209  | 71706261  | NONHSAT127188.2                                | +    | 854  |
| 8 | 71677678  | 71679621  | Homo_sapiens_8_71677433-71678968-HERVHF-pol    | +    | 8    |
|   | 71675209  | 71706261  | NONHSAG050489.2                                | +    | 1943 |
| 8 | 71677678  | 71679621  | Homo_sapiens_8_71677433-71678968-HERVHF-pol    | +    | 8    |
|   | 71675209  | 71706261  | NONHSAT127188.2                                | +    | 1943 |
| 8 | 71680214  | 71680514  | Homo_sapiens_8_71677433-71678968-HERVHF-3LTR   | +    | 8    |

|   |                                                                |   |      |  |
|---|----------------------------------------------------------------|---|------|--|
|   | 71675209 71706261 NONHSAG050489.2                              | + | 300  |  |
| 8 | 71680214 71680514 Homo_sapiens_8_71677433-71678968-HERVHF-3LTR | + | 8    |  |
|   | 71675209 71706261 NONHSAT127188.2                              | + | 300  |  |
| 8 | 71676972 71677343 Homo_sapiens_8_71677433-71678968-HERVHF-gag  | + | 8    |  |
|   | 71675300 71702786 ENSG00000254277                              | + | 371  |  |
| 8 | 71677387 71678241 Homo_sapiens_8_71677433-71678968-HERVHF-pro  | + | 8    |  |
|   | 71675300 71702786 ENSG00000254277                              | + | 854  |  |
| 8 | 71677678 71679621 Homo_sapiens_8_71677433-71678968-HERVHF-pol  | + | 8    |  |
|   | 71675300 71702786 ENSG00000254277                              | + | 1943 |  |
| 8 | 71680214 71680514 Homo_sapiens_8_71677433-71678968-HERVHF-3LTR | + | 8    |  |
|   | 71675300 71702786 ENSG00000254277                              | + | 300  |  |
| 8 | 71676972 71677343 Homo_sapiens_8_71677433-71678968-HERVHF-gag  | + | 8    |  |
|   | 71675328 71704577 NONHSAT127189.2                              | + | 371  |  |
| 8 | 71677387 71678241 Homo_sapiens_8_71677433-71678968-HERVHF-pro  | + | 8    |  |
|   | 71675328 71704577 NONHSAT127189.2                              | + | 854  |  |
| 8 | 71677678 71679621 Homo_sapiens_8_71677433-71678968-HERVHF-pol  | + | 8    |  |
|   | 71675328 71704577 NONHSAT127189.2                              | + | 1943 |  |
| 8 | 71680214 71680514 Homo_sapiens_8_71677433-71678968-HERVHF-3LTR | + | 8    |  |
|   | 71675328 71704577 NONHSAT127189.2                              | + | 300  |  |
| 8 | 71676972 71677343 Homo_sapiens_8_71677433-71678968-HERVHF-gag  | + | 8    |  |
|   | 71675376 71702435 NONHSAT127190.2                              | + | 371  |  |
| 8 | 71677387 71678241 Homo_sapiens_8_71677433-71678968-HERVHF-pro  | + | 8    |  |
|   | 71675376 71702435 NONHSAT127190.2                              | + | 854  |  |
| 8 | 71677678 71679621 Homo_sapiens_8_71677433-71678968-HERVHF-pol  | + | 8    |  |
|   | 71675376 71702435 NONHSAT127190.2                              | + | 1943 |  |
| 8 | 71680214 71680514 Homo_sapiens_8_71677433-71678968-HERVHF-3LTR | + | 8    |  |
|   | 71675376 71702435 NONHSAT127190.2                              | + | 300  |  |
| 8 | 71676972 71677343 Homo_sapiens_8_71677433-71678968-HERVHF-gag  | + | 8    |  |
|   | 71675377 71702435 ENSG00000254277                              | + | 371  |  |
| 8 | 71677387 71678241 Homo_sapiens_8_71677433-71678968-HERVHF-pro  | + | 8    |  |
|   | 71675377 71702435 ENSG00000254277                              | + | 854  |  |
| 8 | 71677678 71679621 Homo_sapiens_8_71677433-71678968-HERVHF-pol  | + | 8    |  |
|   | 71675377 71702435 ENSG00000254277                              | + | 1943 |  |
| 8 | 71680214 71680514 Homo_sapiens_8_71677433-71678968-HERVHF-3LTR | + | 8    |  |
|   | 71675377 71702435 ENSG00000254277                              | + | 300  |  |
| 8 | 90090224 90090661 Homo_sapiens_8_90091914-90093348-HERVHF-5LTR | - | 8    |  |
|   | 90063299 90095475 ENSG00000104327                              | - | 437  |  |
| 8 | 90091063 90093283 Homo_sapiens_8_90091914-90093348-HERVHF-pol  | - | 8    |  |
|   | 90063299 90095475 ENSG00000104327                              | - | 2220 |  |
| 8 | 90093495 90093794 Homo_sapiens_8_90091914-90093348-HERVHF-gag  | - | 8    |  |
|   | 90063299 90095475 ENSG00000104327                              | - | 299  |  |
| 8 | 90090224 90090661 Homo_sapiens_8_90091914-90093348-HERVHF-5LTR | - | 8    |  |
|   | 90063435 90095351 ENSG00000104327                              | - | 437  |  |
| 8 | 90091063 90093283 Homo_sapiens_8_90091914-90093348-HERVHF-pol  | - | 8    |  |

90063435 90095351 ENSG00000104327 - 2220

8 90093495 90093794 Homo\_sapiens\_8\_90091914-90093348-HERVHF-gag - 8  
90063435 90095351 ENSG00000104327 - 299

8 90090224 90090661 Homo\_sapiens\_8\_90091914-90093348-HERVHF-5LTR - 8  
90078369 90095459 NONHSAG050711.2 - 437

8 90090224 90090661 Homo\_sapiens\_8\_90091914-90093348-HERVHF-5LTR - 8  
90078369 90095459 NONHSAT127642.2 - 437

8 90091063 90093283 Homo\_sapiens\_8\_90091914-90093348-HERVHF-pol - 8  
90078369 90095459 NONHSAG050711.2 - 2220

8 90091063 90093283 Homo\_sapiens\_8\_90091914-90093348-HERVHF-pol - 8  
90078369 90095459 NONHSAT127642.2 - 2220

8 90093495 90093794 Homo\_sapiens\_8\_90091914-90093348-HERVHF-gag - 8  
90078369 90095459 NONHSAG050711.2 - 299

8 90093495 90093794 Homo\_sapiens\_8\_90091914-90093348-HERVHF-gag - 8  
90078369 90095459 NONHSAT127642.2 - 299

8 90090224 90090661 Homo\_sapiens\_8\_90091914-90093348-HERVHF-5LTR - 8  
90078424 90095470 ENSG00000104327 - 437

8 90091063 90093283 Homo\_sapiens\_8\_90091914-90093348-HERVHF-pol - 8  
90078424 90095470 ENSG00000104327 - 2220

8 90093495 90093794 Homo\_sapiens\_8\_90091914-90093348-HERVHF-gag - 8  
90078424 90095470 ENSG00000104327 - 299

8 97200769 97206658 Homo\_sapiens\_8\_97202388-97204973-HERVHF + 8 97192408  
97208977 NONHSAG098987.1 + 5889

8 97200769 97201222 Homo\_sapiens\_8\_97202388-97204973-HERVHF-5LTR + 8  
97192408 97208977 NONHSAG098987.1 + 453

8 97200769 97206658 Homo\_sapiens\_8\_97202388-97204973-HERVHF + 8 97192408  
97208977 NONHSAT216128.1 + 5889

8 97200769 97201222 Homo\_sapiens\_8\_97202388-97204973-HERVHF-5LTR + 8  
97192408 97208977 NONHSAT216128.1 + 453

8 97202976 97203299 Homo\_sapiens\_8\_97202388-97204973-HERVHF-gag + 8  
97192408 97208977 NONHSAG098987.1 + 323

8 97202976 97203299 Homo\_sapiens\_8\_97202388-97204973-HERVHF-gag + 8  
97192408 97208977 NONHSAT216128.1 + 323

8 97203392 97204225 Homo\_sapiens\_8\_97202388-97204973-HERVHF-pro + 8  
97192408 97208977 NONHSAG098987.1 + 833

8 97203392 97204225 Homo\_sapiens\_8\_97202388-97204973-HERVHF-pro + 8  
97192408 97208977 NONHSAT216128.1 + 833

8 97203683 97205588 Homo\_sapiens\_8\_97202388-97204973-HERVHF-pol + 8  
97192408 97208977 NONHSAG098987.1 + 1905

8 97203683 97205588 Homo\_sapiens\_8\_97202388-97204973-HERVHF-pol + 8  
97192408 97208977 NONHSAT216128.1 + 1905

8 97206202 97206658 Homo\_sapiens\_8\_97202388-97204973-HERVHF-3LTR + 8  
97192408 97208977 NONHSAG098987.1 + 456

8 97206202 97206658 Homo\_sapiens\_8\_97202388-97204973-HERVHF-3LTR + 8

97192408 97208977 NONHSAT216128.1 + 456

|   |           |           |                                                |   |      |
|---|-----------|-----------|------------------------------------------------|---|------|
| 8 | 114284546 | 114285295 | Homo_sapiens_8_114284508-114286044-HERVHF-pro  | + | 8    |
|   | 114281914 | 114311268 | NONHSAG051074.2                                | + | 749  |
| 8 | 114284546 | 114285295 | Homo_sapiens_8_114284508-114286044-HERVHF-pro  | + | 8    |
|   | 114281914 | 114305621 | NONHSAT128350.2                                | + | 749  |
| 8 | 114284753 | 114286697 | Homo_sapiens_8_114284508-114286044-HERVHF-pol  | + | 8    |
|   | 114281914 | 114311268 | NONHSAG051074.2                                | + | 1944 |
| 8 | 114284753 | 114286697 | Homo_sapiens_8_114284508-114286044-HERVHF-pol  | + | 8    |
|   | 114281914 | 114305621 | NONHSAT128350.2                                | + | 1944 |
| 8 | 114287268 | 114287727 | Homo_sapiens_8_114284508-114286044-HERVHF-3LTR | + |      |
| 8 | 114281914 | 114311268 | NONHSAG051074.2                                | + | 459  |
| 8 | 114287268 | 114287727 | Homo_sapiens_8_114284508-114286044-HERVHF-3LTR | + |      |
| 8 | 114281914 | 114305621 | NONHSAT128350.2                                | + | 459  |
| 8 | 114284546 | 114285295 | Homo_sapiens_8_114284508-114286044-HERVHF-pro  | + | 8    |
|   | 114282066 | 114295807 | NONHSAT128351.2                                | + | 749  |
| 8 | 114284753 | 114286697 | Homo_sapiens_8_114284508-114286044-HERVHF-pol  | + | 8    |
|   | 114282066 | 114295807 | NONHSAT128351.2                                | + | 1944 |
| 8 | 114287268 | 114287727 | Homo_sapiens_8_114284508-114286044-HERVHF-3LTR | + |      |
| 8 | 114282066 | 114295807 | NONHSAT128351.2                                | + | 459  |
| 8 | 114284546 | 114285295 | Homo_sapiens_8_114284508-114286044-HERVHF-pro  | + | 8    |
|   | 114282067 | 114295807 | ENSG00000254339                                | + | 749  |
| 8 | 114284546 | 114285295 | Homo_sapiens_8_114284508-114286044-HERVHF-pro  | + | 8    |
|   | 114282067 | 114295840 | NONHSAT216269.1                                | + | 749  |
| 8 | 114284753 | 114286697 | Homo_sapiens_8_114284508-114286044-HERVHF-pol  | + | 8    |
|   | 114282067 | 114295807 | ENSG00000254339                                | + | 1944 |
| 8 | 114284753 | 114286697 | Homo_sapiens_8_114284508-114286044-HERVHF-pol  | + | 8    |
|   | 114282067 | 114295840 | NONHSAT216269.1                                | + | 1944 |
| 8 | 114287268 | 114287727 | Homo_sapiens_8_114284508-114286044-HERVHF-3LTR | + |      |
| 8 | 114282067 | 114295807 | ENSG00000254339                                | + | 459  |
| 8 | 114287268 | 114287727 | Homo_sapiens_8_114284508-114286044-HERVHF-3LTR | + |      |
| 8 | 114282067 | 114295840 | NONHSAT216269.1                                | + | 459  |
| 8 | 114284546 | 114285295 | Homo_sapiens_8_114284508-114286044-HERVHF-pro  | + | 8    |
|   | 114282068 | 114295813 | NONHSAT128352.2                                | + | 749  |
| 8 | 114284753 | 114286697 | Homo_sapiens_8_114284508-114286044-HERVHF-pol  | + | 8    |
|   | 114282068 | 114295813 | NONHSAT128352.2                                | + | 1944 |
| 8 | 114287268 | 114287727 | Homo_sapiens_8_114284508-114286044-HERVHF-3LTR | + |      |
| 8 | 114282068 | 114295813 | NONHSAT128352.2                                | + | 459  |
| 8 | 114284546 | 114285295 | Homo_sapiens_8_114284508-114286044-HERVHF-pro  | + | 8    |
|   | 114282069 | 114295813 | ENSG00000254339                                | + | 749  |
| 8 | 114284753 | 114286697 | Homo_sapiens_8_114284508-114286044-HERVHF-pol  | + | 8    |
|   | 114282069 | 114295813 | ENSG00000254339                                | + | 1944 |
| 8 | 114287268 | 114287727 | Homo_sapiens_8_114284508-114286044-HERVHF-3LTR | + |      |
| 8 | 114282069 | 114295813 | ENSG00000254339                                | + | 459  |
| 8 | 114284546 | 114285295 | Homo_sapiens_8_114284508-114286044-HERVHF-pro  | + | 8    |



|   |           |           |                                                |   |      |   |
|---|-----------|-----------|------------------------------------------------|---|------|---|
|   | 114282071 | 114295624 | NONHSAT128353.2                                | + | 749  |   |
| 8 | 114284753 | 114286697 | Homo_sapiens_8_114284508-114286044-HERVHF-pol  | + |      | 8 |
|   | 114282071 | 114295624 | NONHSAT128353.2                                | + | 1944 |   |
| 8 | 114287268 | 114287727 | Homo_sapiens_8_114284508-114286044-HERVHF-3LTR | + |      |   |
| 8 | 114282071 | 114295624 | NONHSAT128353.2                                | + | 459  |   |
| 8 | 114284546 | 114285295 | Homo_sapiens_8_114284508-114286044-HERVHF-pro  | + |      | 8 |
|   | 114282072 | 114295624 | ENSG00000254339                                | + | 749  |   |
| 8 | 114284546 | 114285295 | Homo_sapiens_8_114284508-114286044-HERVHF-pro  | + |      | 8 |
|   | 114282072 | 114295839 | NONHSAT128354.2                                | + | 749  |   |
| 8 | 114284753 | 114286697 | Homo_sapiens_8_114284508-114286044-HERVHF-pol  | + |      | 8 |
|   | 114282072 | 114295624 | ENSG00000254339                                | + | 1944 |   |
| 8 | 114284753 | 114286697 | Homo_sapiens_8_114284508-114286044-HERVHF-pol  | + |      | 8 |
|   | 114282072 | 114295839 | NONHSAT128354.2                                | + | 1944 |   |
| 8 | 114287268 | 114287727 | Homo_sapiens_8_114284508-114286044-HERVHF-3LTR | + |      |   |
| 8 | 114282072 | 114295624 | ENSG00000254339                                | + | 459  |   |
| 8 | 114287268 | 114287727 | Homo_sapiens_8_114284508-114286044-HERVHF-3LTR | + |      |   |
| 8 | 114282072 | 114295839 | NONHSAT128354.2                                | + | 459  |   |
| 8 | 114284546 | 114285295 | Homo_sapiens_8_114284508-114286044-HERVHF-pro  | + |      | 8 |
|   | 114282073 | 114295839 | ENSG00000254339                                | + | 749  |   |
| 8 | 114284753 | 114286697 | Homo_sapiens_8_114284508-114286044-HERVHF-pol  | + |      | 8 |
|   | 114282073 | 114295839 | ENSG00000254339                                | + | 1944 |   |
| 8 | 114287268 | 114287727 | Homo_sapiens_8_114284508-114286044-HERVHF-3LTR | + |      |   |
| 8 | 114282073 | 114295839 | ENSG00000254339                                | + | 459  |   |
| 8 | 114284546 | 114285295 | Homo_sapiens_8_114284508-114286044-HERVHF-pro  | + |      | 8 |
|   | 114282081 | 114287996 | NONHSAT128355.2                                | + | 749  |   |
| 8 | 114284753 | 114286697 | Homo_sapiens_8_114284508-114286044-HERVHF-pol  | + |      | 8 |
|   | 114282081 | 114287996 | NONHSAT128355.2                                | + | 1944 |   |
| 8 | 114287268 | 114287727 | Homo_sapiens_8_114284508-114286044-HERVHF-3LTR | + |      |   |
| 8 | 114282081 | 114287996 | NONHSAT128355.2                                | + | 459  |   |
| 8 | 114284546 | 114285295 | Homo_sapiens_8_114284508-114286044-HERVHF-pro  | + |      | 8 |
|   | 114282136 | 114287996 | ENSG00000254339                                | + | 749  |   |
| 8 | 114284753 | 114286697 | Homo_sapiens_8_114284508-114286044-HERVHF-pol  | + |      | 8 |
|   | 114282136 | 114287996 | ENSG00000254339                                | + | 1944 |   |
| 8 | 114287268 | 114287727 | Homo_sapiens_8_114284508-114286044-HERVHF-3LTR | + |      |   |
| 8 | 114282136 | 114287996 | ENSG00000254339                                | + | 459  |   |
| 8 | 132080235 | 132080688 | Homo_sapiens_8_132081909-132083445-HERVHF-5LTR | - |      |   |
| 8 | 132024238 | 132085655 | ENSG00000258417                                | - | 453  |   |
| 8 | 132081082 | 132083067 | Homo_sapiens_8_132081909-132083445-HERVHF-pol  | - |      | 8 |
|   | 132024238 | 132085655 | ENSG00000258417                                | - | 1985 |   |
| 8 | 132083498 | 132083827 | Homo_sapiens_8_132081909-132083445-HERVHF-gag  | - |      | 8 |
|   | 132024238 | 132085655 | ENSG00000258417                                | - | 329  |   |
| 8 | 132080235 | 132086002 | Homo_sapiens_8_132081909-132083445-HERVHF      | - |      | 8 |
|   | 132061486 | 132105265 | ENSG00000132297                                | - | 5767 |   |
| 8 | 132080235 | 132080688 | Homo_sapiens_8_132081909-132083445-HERVHF-5LTR | - |      |   |

|   |           |           |                                                 |      |      |
|---|-----------|-----------|-------------------------------------------------|------|------|
| 8 | 132061486 | 132105265 | ENSG00000132297 -                               | 453  |      |
| 8 | 132081082 | 132083067 | Homo_sapiens_8_132081909-132083445-HERVHF-pol - | 8    |      |
|   | 132061486 | 132105265 | ENSG00000132297 -                               | 1985 |      |
| 8 | 132083498 | 132083827 | Homo_sapiens_8_132081909-132083445-HERVHF-gag - | 8    |      |
|   | 132061486 | 132105265 | ENSG00000132297 -                               | 329  |      |
| 8 | 132085544 | 132086002 | Homo_sapiens_8_132081909-132083445-HERVHF-3LTR  | -    |      |
| 8 | 132061486 | 132105265 | ENSG00000132297 -                               | 458  |      |
| 8 | 132080235 | 132080688 | Homo_sapiens_8_132081909-132083445-HERVHF-5LTR  | -    |      |
| 8 | 132063785 | 132081104 | ENSG00000132297 -                               | 453  |      |
| 8 | 132080235 | 132086002 | Homo_sapiens_8_132081909-132083445-HERVHF       | -    | 8    |
|   | 132063785 | 132111159 | ENSG00000132297 -                               | 5767 |      |
| 8 | 132080235 | 132080688 | Homo_sapiens_8_132081909-132083445-HERVHF-5LTR  | -    |      |
| 8 | 132063785 | 132111159 | ENSG00000132297 -                               | 453  |      |
| 8 | 132081082 | 132083067 | Homo_sapiens_8_132081909-132083445-HERVHF-pol - | 8    |      |
|   | 132063785 | 132111159 | ENSG00000132297 -                               | 1985 |      |
| 8 | 132083498 | 132083827 | Homo_sapiens_8_132081909-132083445-HERVHF-gag - | 8    |      |
|   | 132063785 | 132111159 | ENSG00000132297 -                               | 329  |      |
| 8 | 132085544 | 132086002 | Homo_sapiens_8_132081909-132083445-HERVHF-3LTR  | -    |      |
| 8 | 132063785 | 132111159 | ENSG00000132297 -                               | 458  |      |
| 8 | 132080235 | 132086002 | Homo_sapiens_8_132081909-132083445-HERVHF       | -    | 8    |
|   | 132069675 | 132111159 | ENSG00000132297 -                               | 5767 |      |
| 8 | 132080235 | 132080688 | Homo_sapiens_8_132081909-132083445-HERVHF-5LTR  | -    |      |
| 8 | 132069675 | 132111159 | ENSG00000132297 -                               | 453  |      |
| 8 | 132081082 | 132083067 | Homo_sapiens_8_132081909-132083445-HERVHF-pol - | 8    |      |
|   | 132069675 | 132111159 | ENSG00000132297 -                               | 1985 |      |
| 8 | 132083498 | 132083827 | Homo_sapiens_8_132081909-132083445-HERVHF-gag - | 8    |      |
|   | 132069675 | 132111159 | ENSG00000132297 -                               | 329  |      |
| 8 | 132085544 | 132086002 | Homo_sapiens_8_132081909-132083445-HERVHF-3LTR  | -    |      |
| 8 | 132069675 | 132111159 | ENSG00000132297 -                               | 458  |      |
| 9 | 12950832  | 12951653  | Homo_sapiens_9_12950845-12952399-HERVHF-pro     | +    | 9    |
|   | 12948721  | 12975294  | NONHSAG101172.2                                 | +    | 821  |
| 9 | 12950832  | 12951653  | Homo_sapiens_9_12950845-12952399-HERVHF-pro     | +    | 9    |
|   | 12948721  | 12968675  | NONHSAT256494.1                                 | +    | 821  |
| 9 | 12950832  | 12951653  | Homo_sapiens_9_12950845-12952399-HERVHF-pro     | +    | 9    |
|   | 12948721  | 12975294  | NONHSAT256495.1                                 | +    | 821  |
| 9 | 12950832  | 12951653  | Homo_sapiens_9_12950845-12952399-HERVHF-pro     | +    | 9    |
|   | 12948721  | 12975294  | NONHSAT256496.1                                 | +    | 821  |
| 9 | 12951135  | 12953200  | Homo_sapiens_9_12950845-12952399-HERVHF-pol     | +    | 9    |
|   | 12948721  | 12975294  | NONHSAG101172.2                                 | +    | 2065 |
| 9 | 12951135  | 12953200  | Homo_sapiens_9_12950845-12952399-HERVHF-pol     | +    | 9    |
|   | 12948721  | 12968675  | NONHSAT256494.1                                 | +    | 2065 |
| 9 | 12951135  | 12953200  | Homo_sapiens_9_12950845-12952399-HERVHF-pol     | +    | 9    |
|   | 12948721  | 12975294  | NONHSAT256495.1                                 | +    | 2065 |
| 9 | 12951135  | 12953200  | Homo_sapiens_9_12950845-12952399-HERVHF-pol     | +    | 9    |

|   |          |                 |                                              |      |      |          |
|---|----------|-----------------|----------------------------------------------|------|------|----------|
|   | 12948721 | 12975294        | NONHSAT256496.1                              | +    | 2065 |          |
| 9 | 12953648 | 12954130        | Homo_sapiens_9_12950845-12952399-HERVHF-3LTR | +    | 9    |          |
|   | 12948721 | 12975294        | NONHSAG101172.2                              | +    | 482  |          |
| 9 | 12953648 | 12954130        | Homo_sapiens_9_12950845-12952399-HERVHF-3LTR | +    | 9    |          |
|   | 12948721 | 12968675        | NONHSAT256494.1                              | +    | 482  |          |
| 9 | 12953648 | 12954130        | Homo_sapiens_9_12950845-12952399-HERVHF-3LTR | +    | 9    |          |
|   | 12948721 | 12975294        | NONHSAT256495.1                              | +    | 482  |          |
| 9 | 12953648 | 12954130        | Homo_sapiens_9_12950845-12952399-HERVHF-3LTR | +    | 9    |          |
|   | 12948721 | 12975294        | NONHSAT256496.1                              | +    | 482  |          |
| 9 | 80137297 | 80143055        | Homo_sapiens_9_80139873-80141469-HERVHF      | +    | 9    | 79824529 |
|   | 80182097 | NONHSAG052646.2 | +                                            | 5758 |      |          |
| 9 | 80137297 | 80137640        | Homo_sapiens_9_80139873-80141469-HERVHF-5LTR | +    | 9    |          |
|   | 79824529 | 80182097        | NONHSAG052646.2                              | +    | 343  |          |
| 9 | 80139559 | 80139885        | Homo_sapiens_9_80139873-80141469-HERVHF-gag  | +    | 9    |          |
|   | 79824529 | 80182097        | NONHSAG052646.2                              | +    | 326  |          |
| 9 | 80140314 | 80142260        | Homo_sapiens_9_80139873-80141469-HERVHF-pol  | +    | 9    |          |
|   | 79824529 | 80182097        | NONHSAG052646.2                              | +    | 1946 |          |
| 9 | 80142712 | 80143055        | Homo_sapiens_9_80139873-80141469-HERVHF-3LTR | +    | 9    |          |
|   | 79824529 | 80182097        | NONHSAG052646.2                              | +    | 343  |          |
| 9 | 80137297 | 80143055        | Homo_sapiens_9_80139873-80141469-HERVHF      | +    | 9    | 79988025 |
|   | 80182097 | NONHSAT219669.1 | +                                            | 5758 |      |          |
| 9 | 80137297 | 80137640        | Homo_sapiens_9_80139873-80141469-HERVHF-5LTR | +    | 9    |          |
|   | 79988025 | 80182097        | NONHSAT219669.1                              | +    | 343  |          |
| 9 | 80139559 | 80139885        | Homo_sapiens_9_80139873-80141469-HERVHF-gag  | +    | 9    |          |
|   | 79988025 | 80182097        | NONHSAT219669.1                              | +    | 326  |          |
| 9 | 80140314 | 80142260        | Homo_sapiens_9_80139873-80141469-HERVHF-pol  | +    | 9    |          |
|   | 79988025 | 80182097        | NONHSAT219669.1                              | +    | 1946 |          |
| 9 | 80142712 | 80143055        | Homo_sapiens_9_80139873-80141469-HERVHF-3LTR | +    | 9    |          |
|   | 79988025 | 80182097        | NONHSAT219669.1                              | +    | 343  |          |
| 9 | 80137297 | 80143055        | Homo_sapiens_9_80139873-80141469-HERVHF      | +    | 9    | 79989859 |
|   | 80182073 | NONHSAT132568.2 | +                                            | 5758 |      |          |
| 9 | 80137297 | 80137640        | Homo_sapiens_9_80139873-80141469-HERVHF-5LTR | +    | 9    |          |
|   | 79989859 | 80182073        | NONHSAT132568.2                              | +    | 343  |          |
| 9 | 80139559 | 80139885        | Homo_sapiens_9_80139873-80141469-HERVHF-gag  | +    | 9    |          |
|   | 79989859 | 80182073        | NONHSAT132568.2                              | +    | 326  |          |
| 9 | 80140314 | 80142260        | Homo_sapiens_9_80139873-80141469-HERVHF-pol  | +    | 9    |          |
|   | 79989859 | 80182073        | NONHSAT132568.2                              | +    | 1946 |          |
| 9 | 80142712 | 80143055        | Homo_sapiens_9_80139873-80141469-HERVHF-3LTR | +    | 9    |          |
|   | 79989859 | 80182073        | NONHSAT132568.2                              | +    | 343  |          |
| 9 | 80137297 | 80143055        | Homo_sapiens_9_80139873-80141469-HERVHF      | +    | 9    | 80030579 |
|   | 80181759 | NONHSAT219670.1 | +                                            | 5758 |      |          |
| 9 | 80137297 | 80137640        | Homo_sapiens_9_80139873-80141469-HERVHF-5LTR | +    | 9    |          |
|   | 80030579 | 80181759        | NONHSAT219670.1                              | +    | 343  |          |
| 9 | 80139559 | 80139885        | Homo_sapiens_9_80139873-80141469-HERVHF-gag  | +    | 9    |          |

|    |           |           |                                                |   |      |          |
|----|-----------|-----------|------------------------------------------------|---|------|----------|
|    | 80030579  | 80181759  | NONHSAT219670.1                                | + | 326  |          |
| 9  | 80140314  | 80142260  | Homo_sapiens_9_80139873-80141469-HERVHF-pol    | + | 9    |          |
|    | 80030579  | 80181759  | NONHSAT219670.1                                | + | 1946 |          |
| 9  | 80142712  | 80143055  | Homo_sapiens_9_80139873-80141469-HERVHF-3LTR   | + | 9    |          |
|    | 80030579  | 80181759  | NONHSAT219670.1                                | + | 343  |          |
| 9  | 85458329  | 85466955  | Homo_sapiens_9_85461166-85462902-HERVHF        | + | 9    | 85461082 |
|    | 85461878  |           | NONHSAT219743.1                                | + | 796  |          |
| 9  | 85461120  | 85461926  | Homo_sapiens_9_85461166-85462902-HERVHF-pro    | + | 9    |          |
|    | 85461082  | 85467386  | NONHSAG052703.2                                | + | 806  |          |
| 9  | 85461120  | 85461926  | Homo_sapiens_9_85461166-85462902-HERVHF-pro    | + | 9    |          |
|    | 85461082  | 85467386  | NONHSAT132793.2                                | + | 806  |          |
| 9  | 85461315  | 85463744  | Homo_sapiens_9_85461166-85462902-HERVHF-pol    | + | 9    |          |
|    | 85461082  | 85467386  | NONHSAG052703.2                                | + | 2429 |          |
| 9  | 85461315  | 85463744  | Homo_sapiens_9_85461166-85462902-HERVHF-pol    | + | 9    |          |
|    | 85461082  | 85467386  | NONHSAT132793.2                                | + | 2429 |          |
| 9  | 85465130  | 85466268  | Homo_sapiens_9_85461166-85462902-HERVHF-env    | + | 9    |          |
|    | 85461082  | 85467386  | NONHSAG052703.2                                | + | 1138 |          |
| 9  | 85465130  | 85466268  | Homo_sapiens_9_85461166-85462902-HERVHF-env    | + | 9    |          |
|    | 85461082  | 85467386  | NONHSAT132793.2                                | + | 1138 |          |
| 9  | 85466509  | 85466955  | Homo_sapiens_9_85461166-85462902-HERVHF-3LTR   | + | 9    |          |
|    | 85461082  | 85467386  | NONHSAG052703.2                                | + | 446  |          |
| 9  | 85466509  | 85466955  | Homo_sapiens_9_85461166-85462902-HERVHF-3LTR   | + | 9    |          |
|    | 85461082  | 85467386  | NONHSAT132793.2                                | + | 446  |          |
| 9  | 115475420 | 115475800 | Homo_sapiens_9_115475976-115477349-HERVHF-gag  | + | 9    |          |
|    | 115473527 | 115692166 | NONHSAG053288.3                                | + | 380  |          |
| 9  | 115475420 | 115475800 | Homo_sapiens_9_115475976-115477349-HERVHF-gag  | + | 9    |          |
|    | 115473527 | 115591079 | NONHSAT134412.2                                | + | 380  |          |
| 9  | 115476023 | 115476676 | Homo_sapiens_9_115475976-115477349-HERVHF-pro  | + | 9    |          |
|    | 115473527 | 115692166 | NONHSAG053288.3                                | + | 653  |          |
| 9  | 115476023 | 115476676 | Homo_sapiens_9_115475976-115477349-HERVHF-pro  | + | 9    |          |
|    | 115473527 | 115591079 | NONHSAT134412.2                                | + | 653  |          |
| 9  | 115476248 | 115478150 | Homo_sapiens_9_115475976-115477349-HERVHF-pol  | + | 9    |          |
|    | 115473527 | 115692166 | NONHSAG053288.3                                | + | 1902 |          |
| 9  | 115476248 | 115478150 | Homo_sapiens_9_115475976-115477349-HERVHF-pol  | + | 9    |          |
|    | 115473527 | 115591079 | NONHSAT134412.2                                | + | 1902 |          |
| 9  | 115478470 | 115478923 | Homo_sapiens_9_115475976-115477349-HERVHF-3LTR | + |      |          |
| 9  | 115473527 | 115692166 | NONHSAG053288.3                                | + | 453  |          |
| 9  | 115478470 | 115478923 | Homo_sapiens_9_115475976-115477349-HERVHF-3LTR | + |      |          |
| 9  | 115473527 | 115591079 | NONHSAT134412.2                                | + | 453  |          |
| 10 | 6797081   | 6802954   | Homo_sapiens_10_6798770-6800364-HERVHF         | - | 10   | 6738434  |
|    | 6842906   |           | NONHSAG005151.3                                | - | 5873 |          |
| 10 | 6797081   | 6797535   | Homo_sapiens_10_6798770-6800364-HERVHF-5LTR    | - | 10   | 6738434  |
|    | 6842906   |           | NONHSAG005151.3                                | - | 454  |          |
| 10 | 6797081   | 6802954   | Homo_sapiens_10_6798770-6800364-HERVHF         | - | 10   | 6738434  |

|    |          |                                                        |        |    |          |  |
|----|----------|--------------------------------------------------------|--------|----|----------|--|
|    | 6842906  | NONHSAT011256.2-                                       | 5873   |    |          |  |
| 10 | 6797081  | 6797535 Homo_sapiens_10_6798770-6800364-HERVHF-5LTR    | -      | 10 | 6738434  |  |
|    | 6842906  | NONHSAT011256.2-                                       | 454    |    |          |  |
| 10 | 6798366  | 6799928 Homo_sapiens_10_6798770-6800364-HERVHF-pol     | -      | 10 | 6738434  |  |
|    | 6842906  | NONHSAG005151.3                                        | - 1562 |    |          |  |
| 10 | 6798366  | 6799928 Homo_sapiens_10_6798770-6800364-HERVHF-pol     | -      | 10 | 6738434  |  |
|    | 6842906  | NONHSAT011256.2-                                       | 1562   |    |          |  |
| 10 | 6800444  | 6800767 Homo_sapiens_10_6798770-6800364-HERVHF-gag     | -      | 10 | 6738434  |  |
|    | 6842906  | NONHSAG005151.3                                        | - 323  |    |          |  |
| 10 | 6800444  | 6800767 Homo_sapiens_10_6798770-6800364-HERVHF-gag     | -      | 10 | 6738434  |  |
|    | 6842906  | NONHSAT011256.2-                                       | 323    |    |          |  |
| 10 | 6802501  | 6802954 Homo_sapiens_10_6798770-6800364-HERVHF-3LTR    | -      | 10 | 6738434  |  |
|    | 6842906  | NONHSAG005151.3                                        | - 453  |    |          |  |
| 10 | 6802501  | 6802954 Homo_sapiens_10_6798770-6800364-HERVHF-3LTR    | -      | 10 | 6738434  |  |
|    | 6842906  | NONHSAT011256.2-                                       | 453    |    |          |  |
| 10 | 6797081  | 6797535 Homo_sapiens_10_6798770-6800364-HERVHF-5LTR    | -      | 10 | 6796177  |  |
|    | 6802848  | NONHSAG005154.3                                        | - 454  |    |          |  |
| 10 | 6797081  | 6797535 Homo_sapiens_10_6798770-6800364-HERVHF-5LTR    | -      | 10 | 6796177  |  |
|    | 6802848  | NONHSAT011265.2-                                       | 454    |    |          |  |
| 10 | 6798366  | 6799928 Homo_sapiens_10_6798770-6800364-HERVHF-pol     | -      | 10 | 6796177  |  |
|    | 6802848  | NONHSAG005154.3                                        | - 1562 |    |          |  |
| 10 | 6798366  | 6799928 Homo_sapiens_10_6798770-6800364-HERVHF-pol     | -      | 10 | 6796177  |  |
|    | 6802848  | NONHSAT011265.2-                                       | 1562   |    |          |  |
| 10 | 6800444  | 6800767 Homo_sapiens_10_6798770-6800364-HERVHF-gag     | -      | 10 | 6796177  |  |
|    | 6802848  | NONHSAG005154.3                                        | - 323  |    |          |  |
| 10 | 6800444  | 6800767 Homo_sapiens_10_6798770-6800364-HERVHF-gag     | -      | 10 | 6796177  |  |
|    | 6802848  | NONHSAT011265.2-                                       | 323    |    |          |  |
| 10 | 25716420 | 25722928 Homo_sapiens_10_25718978-25720776-HERVHF      | +      | 10 | 25651711 |  |
|    | 25732935 | NONHSAG005427.3                                        | + 6508 |    |          |  |
| 10 | 25716420 | 25716834 Homo_sapiens_10_25718978-25720776-HERVHF-5LTR | +      | 10 |          |  |
|    | 25651711 | 25732935 NONHSAG005427.3                               | + 414  |    |          |  |
| 10 | 25716420 | 25722928 Homo_sapiens_10_25718978-25720776-HERVHF      | +      | 10 | 25651711 |  |
|    | 25732935 | NONHSAT011808.2+                                       | 6508   |    |          |  |
| 10 | 25716420 | 25716834 Homo_sapiens_10_25718978-25720776-HERVHF-5LTR | +      | 10 |          |  |
|    | 25651711 | 25732935 NONHSAT011808.2+                              | 414    |    |          |  |
| 10 | 25716420 | 25722928 Homo_sapiens_10_25718978-25720776-HERVHF      | +      | 10 | 25651711 |  |
|    | 25732935 | NONHSAT155232.1                                        | + 6508 |    |          |  |
| 10 | 25716420 | 25716834 Homo_sapiens_10_25718978-25720776-HERVHF-5LTR | +      | 10 |          |  |
|    | 25651711 | 25732935 NONHSAT155232.1                               | + 414  |    |          |  |
| 10 | 25718477 | 25718863 Homo_sapiens_10_25718978-25720776-HERVHF-gag  | +      | 10 |          |  |
|    | 25651711 | 25732935 NONHSAG005427.3                               | + 386  |    |          |  |
| 10 | 25718477 | 25718863 Homo_sapiens_10_25718978-25720776-HERVHF-gag  | +      | 10 |          |  |
|    | 25651711 | 25732935 NONHSAT011808.2+                              | 386    |    |          |  |
| 10 | 25718477 | 25718863 Homo_sapiens_10_25718978-25720776-HERVHF-gag  | +      | 10 |          |  |

|    |                                                                 |      |      |          |
|----|-----------------------------------------------------------------|------|------|----------|
|    | 25651711 25732935 NONHSAT155232.1                               | +    | 386  |          |
| 10 | 25718959 25719759 Homo_sapiens_10_25718978-25720776-HERVHF-pro  | +    | 10   |          |
|    | 25651711 25732935 NONHSAG005427.3                               | +    | 800  |          |
| 10 | 25718959 25719759 Homo_sapiens_10_25718978-25720776-HERVHF-pro  | +    | 10   |          |
|    | 25651711 25732935 NONHSAT011808.2+                              | 800  |      |          |
| 10 | 25718959 25719759 Homo_sapiens_10_25718978-25720776-HERVHF-pro  | +    | 10   |          |
|    | 25651711 25732935 NONHSAT155232.1                               | +    | 800  |          |
| 10 | 25719121 25721515 Homo_sapiens_10_25718978-25720776-HERVHF-pol  | +    | 10   |          |
|    | 25651711 25732935 NONHSAG005427.3                               | +    | 2394 |          |
| 10 | 25719121 25721515 Homo_sapiens_10_25718978-25720776-HERVHF-pol  | +    | 10   |          |
|    | 25651711 25732935 NONHSAT011808.2+                              | 2394 |      |          |
| 10 | 25719121 25721515 Homo_sapiens_10_25718978-25720776-HERVHF-pol  | +    | 10   |          |
|    | 25651711 25732935 NONHSAT155232.1                               | +    | 2394 |          |
| 10 | 25722171 25722503 Homo_sapiens_10_25718978-25720776-HERVHF-env  | +    | 10   |          |
|    | 25651711 25732935 NONHSAG005427.3                               | +    | 332  |          |
| 10 | 25722171 25722503 Homo_sapiens_10_25718978-25720776-HERVHF-env  | +    | 10   |          |
|    | 25651711 25732935 NONHSAT011808.2+                              | 332  |      |          |
| 10 | 25722171 25722503 Homo_sapiens_10_25718978-25720776-HERVHF-env  | +    | 10   |          |
|    | 25651711 25732935 NONHSAT155232.1                               | +    | 332  |          |
| 10 | 25722512 25722928 Homo_sapiens_10_25718978-25720776-HERVHF-3LTR | +    | 10   |          |
|    | 25651711 25732935 NONHSAG005427.3                               | +    | 416  |          |
| 10 | 25722512 25722928 Homo_sapiens_10_25718978-25720776-HERVHF-3LTR | +    | 10   |          |
|    | 25651711 25732935 NONHSAT011808.2+                              | 416  |      |          |
| 10 | 25722512 25722928 Homo_sapiens_10_25718978-25720776-HERVHF-3LTR | +    | 10   |          |
|    | 25651711 25732935 NONHSAT155232.1                               | +    | 416  |          |
| 10 | 25716420 25722928 Homo_sapiens_10_25718978-25720776-HERVHF      | +    | 10   | 25651712 |
|    | 25732935 ENSG00000280809                                        | +    | 6508 |          |
| 10 | 25716420 25716834 Homo_sapiens_10_25718978-25720776-HERVHF-5LTR | +    | 10   |          |
|    | 25651712 25732935 ENSG00000280809                               | +    | 414  |          |
| 10 | 25718477 25718863 Homo_sapiens_10_25718978-25720776-HERVHF-gag  | +    | 10   |          |
|    | 25651712 25732935 ENSG00000280809                               | +    | 386  |          |
| 10 | 25718959 25719759 Homo_sapiens_10_25718978-25720776-HERVHF-pro  | +    | 10   |          |
|    | 25651712 25732935 ENSG00000280809                               | +    | 800  |          |
| 10 | 25719121 25721515 Homo_sapiens_10_25718978-25720776-HERVHF-pol  | +    | 10   |          |
|    | 25651712 25732935 ENSG00000280809                               | +    | 2394 |          |
| 10 | 25722171 25722503 Homo_sapiens_10_25718978-25720776-HERVHF-env  | +    | 10   |          |
|    | 25651712 25732935 ENSG00000280809                               | +    | 332  |          |
| 10 | 25722512 25722928 Homo_sapiens_10_25718978-25720776-HERVHF-3LTR | +    | 10   |          |
|    | 25651712 25732935 ENSG00000280809                               | +    | 416  |          |
| 10 | 25716420 25722928 Homo_sapiens_10_25718978-25720776-HERVHF      | +    | 10   | 25651719 |
|    | 25732819 ENSG00000280809                                        | +    | 6508 |          |
| 10 | 25716420 25716834 Homo_sapiens_10_25718978-25720776-HERVHF-5LTR | +    | 10   |          |
|    | 25651719 25732819 ENSG00000280809                               | +    | 414  |          |
| 10 | 25718477 25718863 Homo_sapiens_10_25718978-25720776-HERVHF-gag  | +    | 10   |          |

25651719 25732819 ENSG00000280809 + 386  
 10 25718959 25719759 Homo\_sapiens\_10\_25718978-25720776-HERVHF-pro + 10  
 25651719 25732819 ENSG00000280809 + 800  
 10 25719121 25721515 Homo\_sapiens\_10\_25718978-25720776-HERVHF-pol + 10  
 25651719 25732819 ENSG00000280809 + 2394  
 10 25722171 25722503 Homo\_sapiens\_10\_25718978-25720776-HERVHF-env + 10  
 25651719 25732819 ENSG00000280809 + 332  
 10 25722512 25722928 Homo\_sapiens\_10\_25718978-25720776-HERVHF-3LTR + 10  
 25651719 25732819 ENSG00000280809 + 416  
 10 25716420 25722928 Homo\_sapiens\_10\_25718978-25720776-HERVHF + 10 25651735  
 25732741 ENSG00000280809 + 6508  
 10 25716420 25716834 Homo\_sapiens\_10\_25718978-25720776-HERVHF-5LTR + 10  
 25651735 25732741 ENSG00000280809 + 414  
 10 25718477 25718863 Homo\_sapiens\_10\_25718978-25720776-HERVHF-gag + 10  
 25651735 25732741 ENSG00000280809 + 386  
 10 25718959 25719759 Homo\_sapiens\_10\_25718978-25720776-HERVHF-pro + 10  
 25651735 25732741 ENSG00000280809 + 800  
 10 25719121 25721515 Homo\_sapiens\_10\_25718978-25720776-HERVHF-pol + 10  
 25651735 25732741 ENSG00000280809 + 2394  
 10 25722171 25722503 Homo\_sapiens\_10\_25718978-25720776-HERVHF-env + 10  
 25651735 25732741 ENSG00000280809 + 332  
 10 25722512 25722928 Homo\_sapiens\_10\_25718978-25720776-HERVHF-3LTR + 10  
 25651735 25732741 ENSG00000280809 + 416  
 10 25716420 25722928 Homo\_sapiens\_10\_25718978-25720776-HERVHF + 10 25651747  
 25732741 ENSG00000280809 + 6508  
 10 25716420 25716834 Homo\_sapiens\_10\_25718978-25720776-HERVHF-5LTR + 10  
 25651747 25732741 ENSG00000280809 + 414  
 10 25718477 25718863 Homo\_sapiens\_10\_25718978-25720776-HERVHF-gag + 10  
 25651747 25732741 ENSG00000280809 + 386  
 10 25718959 25719759 Homo\_sapiens\_10\_25718978-25720776-HERVHF-pro + 10  
 25651747 25732741 ENSG00000280809 + 800  
 10 25719121 25721515 Homo\_sapiens\_10\_25718978-25720776-HERVHF-pol + 10  
 25651747 25732741 ENSG00000280809 + 2394  
 10 25722171 25722503 Homo\_sapiens\_10\_25718978-25720776-HERVHF-env + 10  
 25651747 25732741 ENSG00000280809 + 332  
 10 25722512 25722928 Homo\_sapiens\_10\_25718978-25720776-HERVHF-3LTR + 10  
 25651747 25732741 ENSG00000280809 + 416  
 10 25716420 25722928 Homo\_sapiens\_10\_25718978-25720776-HERVHF + 10 25651748  
 25732774 ENSG00000280809 + 6508  
 10 25716420 25716834 Homo\_sapiens\_10\_25718978-25720776-HERVHF-5LTR + 10  
 25651748 25732774 ENSG00000280809 + 414  
 10 25716420 25722928 Homo\_sapiens\_10\_25718978-25720776-HERVHF + 10 25651748  
 25732741 ENSG00000280809 + 6508  
 10 25716420 25716834 Homo\_sapiens\_10\_25718978-25720776-HERVHF-5LTR + 10

25651748 25732741 ENSG00000280809 + 414  
 10 25716420 25722928 Homo\_sapiens\_10\_25718978-25720776-HERVHF + 10 25651748  
 25732741 ENSG00000280809 + 6508  
 10 25716420 25716834 Homo\_sapiens\_10\_25718978-25720776-HERVHF-5LTR + 10  
 25651748 25732741 ENSG00000280809 + 414  
 10 25718477 25718863 Homo\_sapiens\_10\_25718978-25720776-HERVHF-gag + 10  
 25651748 25732774 ENSG00000280809 + 386  
 10 25718477 25718863 Homo\_sapiens\_10\_25718978-25720776-HERVHF-gag + 10  
 25651748 25732741 ENSG00000280809 + 386  
 10 25718477 25718863 Homo\_sapiens\_10\_25718978-25720776-HERVHF-gag + 10  
 25651748 25732741 ENSG00000280809 + 386  
 10 25718959 25719759 Homo\_sapiens\_10\_25718978-25720776-HERVHF-pro + 10  
 25651748 25732774 ENSG00000280809 + 800  
 10 25718959 25719759 Homo\_sapiens\_10\_25718978-25720776-HERVHF-pro + 10  
 25651748 25732741 ENSG00000280809 + 800  
 10 25718959 25719759 Homo\_sapiens\_10\_25718978-25720776-HERVHF-pro + 10  
 25651748 25732741 ENSG00000280809 + 800  
 10 25719121 25721515 Homo\_sapiens\_10\_25718978-25720776-HERVHF-pol + 10  
 25651748 25732774 ENSG00000280809 + 2394  
 10 25719121 25721515 Homo\_sapiens\_10\_25718978-25720776-HERVHF-pol + 10  
 25651748 25732741 ENSG00000280809 + 2394  
 10 25719121 25721515 Homo\_sapiens\_10\_25718978-25720776-HERVHF-pol + 10  
 25651748 25732741 ENSG00000280809 + 2394  
 10 25722171 25722503 Homo\_sapiens\_10\_25718978-25720776-HERVHF-env + 10  
 25651748 25732774 ENSG00000280809 + 332  
 10 25722171 25722503 Homo\_sapiens\_10\_25718978-25720776-HERVHF-env + 10  
 25651748 25732741 ENSG00000280809 + 332  
 10 25722171 25722503 Homo\_sapiens\_10\_25718978-25720776-HERVHF-env + 10  
 25651748 25732741 ENSG00000280809 + 332  
 10 25722512 25722928 Homo\_sapiens\_10\_25718978-25720776-HERVHF-3LTR + 10  
 25651748 25732774 ENSG00000280809 + 416  
 10 25722512 25722928 Homo\_sapiens\_10\_25718978-25720776-HERVHF-3LTR + 10  
 25651748 25732741 ENSG00000280809 + 416  
 10 25722512 25722928 Homo\_sapiens\_10\_25718978-25720776-HERVHF-3LTR + 10  
 25651748 25732741 ENSG00000280809 + 416  
 10 25716420 25722928 Homo\_sapiens\_10\_25718978-25720776-HERVHF + 10 25651753  
 25732196 ENSG00000280809 + 6508  
 10 25716420 25716834 Homo\_sapiens\_10\_25718978-25720776-HERVHF-5LTR + 10  
 25651753 25732196 ENSG00000280809 + 414  
 10 25718477 25718863 Homo\_sapiens\_10\_25718978-25720776-HERVHF-gag + 10  
 25651753 25732196 ENSG00000280809 + 386  
 10 25718959 25719759 Homo\_sapiens\_10\_25718978-25720776-HERVHF-pro + 10  
 25651753 25732196 ENSG00000280809 + 800  
 10 25719121 25721515 Homo\_sapiens\_10\_25718978-25720776-HERVHF-pol + 10



25651753 25732196 ENSG00000280809 + 2394  
 10 25722171 25722503 Homo\_sapiens\_10\_25718978-25720776-HERVHF-env + 10  
 25651753 25732196 ENSG00000280809 + 332  
 10 25722512 25722928 Homo\_sapiens\_10\_25718978-25720776-HERVHF-3LTR + 10  
 25651753 25732196 ENSG00000280809 + 416  
 10 25716420 25722928 Homo\_sapiens\_10\_25718978-25720776-HERVHF + 10 25651766  
 25732741 ENSG00000280809 + 6508  
 10 25716420 25716834 Homo\_sapiens\_10\_25718978-25720776-HERVHF-5LTR + 10  
 25651766 25732741 ENSG00000280809 + 414  
 10 25718477 25718863 Homo\_sapiens\_10\_25718978-25720776-HERVHF-gag + 10  
 25651766 25732741 ENSG00000280809 + 386  
 10 25718959 25719759 Homo\_sapiens\_10\_25718978-25720776-HERVHF-pro + 10  
 25651766 25732741 ENSG00000280809 + 800  
 10 25719121 25721515 Homo\_sapiens\_10\_25718978-25720776-HERVHF-pol + 10  
 25651766 25732741 ENSG00000280809 + 2394  
 10 25722171 25722503 Homo\_sapiens\_10\_25718978-25720776-HERVHF-env + 10  
 25651766 25732741 ENSG00000280809 + 332  
 10 25722512 25722928 Homo\_sapiens\_10\_25718978-25720776-HERVHF-3LTR + 10  
 25651766 25732741 ENSG00000280809 + 416  
 10 25716420 25722928 Homo\_sapiens\_10\_25718978-25720776-HERVHF + 10 25651768  
 25731672 ENSG00000280809 + 6508  
 10 25716420 25716834 Homo\_sapiens\_10\_25718978-25720776-HERVHF-5LTR + 10  
 25651768 25731672 ENSG00000280809 + 414  
 10 25716420 25722928 Homo\_sapiens\_10\_25718978-25720776-HERVHF + 10 25651768  
 25732741 ENSG00000280809 + 6508  
 10 25716420 25716834 Homo\_sapiens\_10\_25718978-25720776-HERVHF-5LTR + 10  
 25651768 25732741 ENSG00000280809 + 414  
 10 25716420 25722928 Homo\_sapiens\_10\_25718978-25720776-HERVHF + 10 25651768  
 25732741 ENSG00000280809 + 6508  
 10 25716420 25716834 Homo\_sapiens\_10\_25718978-25720776-HERVHF-5LTR + 10  
 25651768 25732741 ENSG00000280809 + 414  
 10 25718477 25718863 Homo\_sapiens\_10\_25718978-25720776-HERVHF-gag + 10  
 25651768 25731672 ENSG00000280809 + 386  
 10 25718477 25718863 Homo\_sapiens\_10\_25718978-25720776-HERVHF-gag + 10  
 25651768 25732741 ENSG00000280809 + 386  
 10 25718477 25718863 Homo\_sapiens\_10\_25718978-25720776-HERVHF-gag + 10  
 25651768 25732741 ENSG00000280809 + 386  
 10 25718959 25719759 Homo\_sapiens\_10\_25718978-25720776-HERVHF-pro + 10  
 25651768 25731672 ENSG00000280809 + 800  
 10 25718959 25719759 Homo\_sapiens\_10\_25718978-25720776-HERVHF-pro + 10  
 25651768 25732741 ENSG00000280809 + 800  
 10 25718959 25719759 Homo\_sapiens\_10\_25718978-25720776-HERVHF-pro + 10  
 25651768 25732741 ENSG00000280809 + 800  
 10 25719121 25721515 Homo\_sapiens\_10\_25718978-25720776-HERVHF-pol + 10

|    |                                                                 |      |          |
|----|-----------------------------------------------------------------|------|----------|
|    | 25651768 25731672 ENSG00000280809 +                             | 2394 |          |
| 10 | 25719121 25721515 Homo_sapiens_10_25718978-25720776-HERVHF-pol  | +    | 10       |
|    | 25651768 25732741 ENSG00000280809 +                             | 2394 |          |
| 10 | 25719121 25721515 Homo_sapiens_10_25718978-25720776-HERVHF-pol  | +    | 10       |
|    | 25651768 25732741 ENSG00000280809 +                             | 2394 |          |
| 10 | 25722171 25722503 Homo_sapiens_10_25718978-25720776-HERVHF-env  | +    | 10       |
|    | 25651768 25731672 ENSG00000280809 +                             | 332  |          |
| 10 | 25722171 25722503 Homo_sapiens_10_25718978-25720776-HERVHF-env  | +    | 10       |
|    | 25651768 25732741 ENSG00000280809 +                             | 332  |          |
| 10 | 25722171 25722503 Homo_sapiens_10_25718978-25720776-HERVHF-env  | +    | 10       |
|    | 25651768 25732741 ENSG00000280809 +                             | 332  |          |
| 10 | 25722512 25722928 Homo_sapiens_10_25718978-25720776-HERVHF-3LTR | +    | 10       |
|    | 25651768 25731672 ENSG00000280809 +                             | 416  |          |
| 10 | 25722512 25722928 Homo_sapiens_10_25718978-25720776-HERVHF-3LTR | +    | 10       |
|    | 25651768 25732741 ENSG00000280809 +                             | 416  |          |
| 10 | 25722512 25722928 Homo_sapiens_10_25718978-25720776-HERVHF-3LTR | +    | 10       |
|    | 25651768 25732741 ENSG00000280809 +                             | 416  |          |
| 10 | 25716420 25722928 Homo_sapiens_10_25718978-25720776-HERVHF      | +    | 10       |
|    | 25732771 ENSG00000280809 +                                      | 6508 | 25652789 |
| 10 | 25716420 25716834 Homo_sapiens_10_25718978-25720776-HERVHF-5LTR | +    | 10       |
|    | 25652789 25732771 ENSG00000280809 +                             | 414  |          |
| 10 | 25718477 25718863 Homo_sapiens_10_25718978-25720776-HERVHF-gag  | +    | 10       |
|    | 25652789 25732771 ENSG00000280809 +                             | 386  |          |
| 10 | 25718959 25719759 Homo_sapiens_10_25718978-25720776-HERVHF-pro  | +    | 10       |
|    | 25652789 25732771 ENSG00000280809 +                             | 800  |          |
| 10 | 25719121 25721515 Homo_sapiens_10_25718978-25720776-HERVHF-pol  | +    | 10       |
|    | 25652789 25732771 ENSG00000280809 +                             | 2394 |          |
| 10 | 25722171 25722503 Homo_sapiens_10_25718978-25720776-HERVHF-env  | +    | 10       |
|    | 25652789 25732771 ENSG00000280809 +                             | 332  |          |
| 10 | 25722512 25722928 Homo_sapiens_10_25718978-25720776-HERVHF-3LTR | +    | 10       |
|    | 25652789 25732771 ENSG00000280809 +                             | 416  |          |
| 10 | 25716420 25722928 Homo_sapiens_10_25718978-25720776-HERVHF      | +    | 10       |
|    | 25732088 ENSG00000280809 +                                      | 6508 | 25686474 |
| 10 | 25716420 25716834 Homo_sapiens_10_25718978-25720776-HERVHF-5LTR | +    | 10       |
|    | 25686474 25732088 ENSG00000280809 +                             | 414  |          |
| 10 | 25718477 25718863 Homo_sapiens_10_25718978-25720776-HERVHF-gag  | +    | 10       |
|    | 25686474 25732088 ENSG00000280809 +                             | 386  |          |
| 10 | 25718959 25719759 Homo_sapiens_10_25718978-25720776-HERVHF-pro  | +    | 10       |
|    | 25686474 25732088 ENSG00000280809 +                             | 800  |          |
| 10 | 25719121 25721515 Homo_sapiens_10_25718978-25720776-HERVHF-pol  | +    | 10       |
|    | 25686474 25732088 ENSG00000280809 +                             | 2394 |          |
| 10 | 25722171 25722503 Homo_sapiens_10_25718978-25720776-HERVHF-env  | +    | 10       |
|    | 25686474 25732088 ENSG00000280809 +                             | 332  |          |
| 10 | 25722512 25722928 Homo_sapiens_10_25718978-25720776-HERVHF-3LTR | +    | 10       |

25686474 25732088 ENSG00000280809 + 416  
 10 25716420 25722928 Homo\_sapiens\_10\_25718978-25720776-HERVHF + 10 25686479  
 25732820 ENSG00000280809 + 6508  
 10 25716420 25716834 Homo\_sapiens\_10\_25718978-25720776-HERVHF-5LTR + 10  
 25686479 25732820 ENSG00000280809 + 414  
 10 25718477 25718863 Homo\_sapiens\_10\_25718978-25720776-HERVHF-gag + 10  
 25686479 25732820 ENSG00000280809 + 386  
 10 25718959 25719759 Homo\_sapiens\_10\_25718978-25720776-HERVHF-pro + 10  
 25686479 25732820 ENSG00000280809 + 800  
 10 25719121 25721515 Homo\_sapiens\_10\_25718978-25720776-HERVHF-pol + 10  
 25686479 25732820 ENSG00000280809 + 2394  
 10 25722171 25722503 Homo\_sapiens\_10\_25718978-25720776-HERVHF-env + 10  
 25686479 25732820 ENSG00000280809 + 332  
 10 25722512 25722928 Homo\_sapiens\_10\_25718978-25720776-HERVHF-3LTR + 10  
 25686479 25732820 ENSG00000280809 + 416  
 10 25716420 25722928 Homo\_sapiens\_10\_25718978-25720776-HERVHF + 10 25691536  
 25772941 NONHSAG005428.2 + 6508  
 10 25716420 25716834 Homo\_sapiens\_10\_25718978-25720776-HERVHF-5LTR + 10  
 25691536 25772941 NONHSAG005428.2 + 414  
 10 25718477 25718863 Homo\_sapiens\_10\_25718978-25720776-HERVHF-gag + 10  
 25691536 25772941 NONHSAG005428.2 + 386  
 10 25718959 25719759 Homo\_sapiens\_10\_25718978-25720776-HERVHF-pro + 10  
 25691536 25772941 NONHSAG005428.2 + 800  
 10 25719121 25721515 Homo\_sapiens\_10\_25718978-25720776-HERVHF-pol + 10  
 25691536 25772941 NONHSAG005428.2 + 2394  
 10 25722171 25722503 Homo\_sapiens\_10\_25718978-25720776-HERVHF-env + 10  
 25691536 25772941 NONHSAG005428.2 + 332  
 10 25722512 25722928 Homo\_sapiens\_10\_25718978-25720776-HERVHF-3LTR + 10  
 25691536 25772941 NONHSAG005428.2 + 416  
 10 25716420 25722928 Homo\_sapiens\_10\_25718978-25720776-HERVHF + 10 25691717  
 25772941 NONHSAT155235.1 + 6508  
 10 25716420 25716834 Homo\_sapiens\_10\_25718978-25720776-HERVHF-5LTR + 10  
 25691717 25772941 NONHSAT155235.1 + 414  
 10 25718477 25718863 Homo\_sapiens\_10\_25718978-25720776-HERVHF-gag + 10  
 25691717 25772941 NONHSAT155235.1 + 386  
 10 25718959 25719759 Homo\_sapiens\_10\_25718978-25720776-HERVHF-pro + 10  
 25691717 25772941 NONHSAT155235.1 + 800  
 10 25719121 25721515 Homo\_sapiens\_10\_25718978-25720776-HERVHF-pol + 10  
 25691717 25772941 NONHSAT155235.1 + 2394  
 10 25722171 25722503 Homo\_sapiens\_10\_25718978-25720776-HERVHF-env + 10  
 25691717 25772941 NONHSAT155235.1 + 332  
 10 25722512 25722928 Homo\_sapiens\_10\_25718978-25720776-HERVHF-3LTR + 10  
 25691717 25772941 NONHSAT155235.1 + 416  
 10 25716420 25716834 Homo\_sapiens\_10\_25718978-25720776-HERVHF-5LTR + 10

|    |                                                                 |   |      |          |
|----|-----------------------------------------------------------------|---|------|----------|
|    | 25691780 25722651 NONHSAT155236.1                               | + | 414  |          |
| 10 | 25718477 25718863 Homo_sapiens_10_25718978-25720776-HERVHF-gag  | + | 10   |          |
|    | 25691780 25722651 NONHSAT155236.1                               | + | 386  |          |
| 10 | 25718959 25719759 Homo_sapiens_10_25718978-25720776-HERVHF-pro  | + | 10   |          |
|    | 25691780 25722651 NONHSAT155236.1                               | + | 800  |          |
| 10 | 25719121 25721515 Homo_sapiens_10_25718978-25720776-HERVHF-pol  | + | 10   |          |
|    | 25691780 25722651 NONHSAT155236.1                               | + | 2394 |          |
| 10 | 25722171 25722503 Homo_sapiens_10_25718978-25720776-HERVHF-env  | + | 10   |          |
|    | 25691780 25722651 NONHSAT155236.1                               | + | 332  |          |
| 10 | 25716420 25722928 Homo_sapiens_10_25718978-25720776-HERVHF      | + | 10   | 25715562 |
|    | 25732765 ENSG00000280809                                        | + | 6508 |          |
| 10 | 25716420 25716834 Homo_sapiens_10_25718978-25720776-HERVHF-5LTR | + | 10   |          |
|    | 25715562 25732765 ENSG00000280809                               | + | 414  |          |
| 10 | 25718477 25718863 Homo_sapiens_10_25718978-25720776-HERVHF-gag  | + | 10   |          |
|    | 25715562 25732765 ENSG00000280809                               | + | 386  |          |
| 10 | 25718959 25719759 Homo_sapiens_10_25718978-25720776-HERVHF-pro  | + | 10   |          |
|    | 25715562 25732765 ENSG00000280809                               | + | 800  |          |
| 10 | 25719121 25721515 Homo_sapiens_10_25718978-25720776-HERVHF-pol  | + | 10   |          |
|    | 25715562 25732765 ENSG00000280809                               | + | 2394 |          |
| 10 | 25722171 25722503 Homo_sapiens_10_25718978-25720776-HERVHF-env  | + | 10   |          |
|    | 25715562 25732765 ENSG00000280809                               | + | 332  |          |
| 10 | 25722512 25722928 Homo_sapiens_10_25718978-25720776-HERVHF-3LTR | + | 10   |          |
|    | 25715562 25732765 ENSG00000280809                               | + | 416  |          |
| 10 | 25718477 25718863 Homo_sapiens_10_25718978-25720776-HERVHF-gag  | + | 10   |          |
|    | 25716739 25732931 ENSG00000280809                               | + | 386  |          |
| 10 | 25718959 25719759 Homo_sapiens_10_25718978-25720776-HERVHF-pro  | + | 10   |          |
|    | 25716739 25732931 ENSG00000280809                               | + | 800  |          |
| 10 | 25719121 25721515 Homo_sapiens_10_25718978-25720776-HERVHF-pol  | + | 10   |          |
|    | 25716739 25732931 ENSG00000280809                               | + | 2394 |          |
| 10 | 25722171 25722503 Homo_sapiens_10_25718978-25720776-HERVHF-env  | + | 10   |          |
|    | 25716739 25732931 ENSG00000280809                               | + | 332  |          |
| 10 | 25722512 25722928 Homo_sapiens_10_25718978-25720776-HERVHF-3LTR | + | 10   |          |
|    | 25716739 25732931 ENSG00000280809                               | + | 416  |          |
| 11 | 6366039 6371662 Homo_sapiens_11_6368276-6369885-HERVHF          | + | 11   | 6366346  |
|    | 6371567 NONHSAG007525.2                                         | + | 5221 |          |
| 11 | 6366039 6371662 Homo_sapiens_11_6368276-6369885-HERVHF          | + | 11   | 6366346  |
|    | 6371567 NONHSAT017712.2                                         | + | 5221 |          |
| 11 | 6367846 6368226 Homo_sapiens_11_6368276-6369885-HERVHF-gag      | + | 11   | 6366346  |
|    | 6371567 NONHSAG007525.2                                         | + | 380  |          |
| 11 | 6367846 6368226 Homo_sapiens_11_6368276-6369885-HERVHF-gag      | + | 11   | 6366346  |
|    | 6371567 NONHSAT017712.2                                         | + | 380  |          |
| 11 | 6368676 6370836 Homo_sapiens_11_6368276-6369885-HERVHF-pol      | + | 11   | 6366346  |
|    | 6371567 NONHSAG007525.2                                         | + | 2160 |          |
| 11 | 6368676 6370836 Homo_sapiens_11_6368276-6369885-HERVHF-pol      | + | 11   | 6366346  |

|    |          |                                                        |   |      |         |  |
|----|----------|--------------------------------------------------------|---|------|---------|--|
|    | 6371567  | NONHSAT017712.2                                        | + | 2160 |         |  |
| 11 | 6366039  | 6371662 Homo_sapiens_11_6368276-6369885-HERVHF         | + | 11   | 6368204 |  |
|    | 6371567  | NONHSAT017713.2                                        | + | 3363 |         |  |
| 11 | 6368676  | 6370836 Homo_sapiens_11_6368276-6369885-HERVHF-pol     | + | 11   | 6368204 |  |
|    | 6371567  | NONHSAT017713.2                                        | + | 2160 |         |  |
| 11 | 27629072 | 27629528 Homo_sapiens_11_27630864-27632291-HERVHF-5LTR | - | 11   |         |  |
|    | 27599343 | 27634720 NONHSAG007904.2                               | - | 456  |         |  |
| 11 | 27629072 | 27629528 Homo_sapiens_11_27630864-27632291-HERVHF-5LTR | - | 11   |         |  |
|    | 27599343 | 27634720 NONHSAT018512.2                               | - | 456  |         |  |
| 11 | 27630027 | 27632049 Homo_sapiens_11_27630864-27632291-HERVHF-pol  | - | 11   |         |  |
|    | 27599343 | 27634720 NONHSAG007904.2                               | - | 2022 |         |  |
| 11 | 27630027 | 27632049 Homo_sapiens_11_27630864-27632291-HERVHF-pol  | - | 11   |         |  |
|    | 27599343 | 27634720 NONHSAT018512.2                               | - | 2022 |         |  |
| 11 | 27631507 | 27632340 Homo_sapiens_11_27630864-27632291-HERVHF-pro  | - | 11   |         |  |
|    | 27599343 | 27634720 NONHSAG007904.2                               | - | 833  |         |  |
| 11 | 27631507 | 27632340 Homo_sapiens_11_27630864-27632291-HERVHF-pro  | - | 11   |         |  |
|    | 27599343 | 27634720 NONHSAT018512.2                               | - | 833  |         |  |
| 11 | 27632416 | 27632889 Homo_sapiens_11_27630864-27632291-HERVHF-gag  | - | 11   |         |  |
|    | 27599343 | 27634720 NONHSAG007904.2                               | - | 473  |         |  |
| 11 | 27632416 | 27632889 Homo_sapiens_11_27630864-27632291-HERVHF-gag  | - | 11   |         |  |
|    | 27599343 | 27634720 NONHSAT018512.2                               | - | 473  |         |  |
| 11 | 27629072 | 27629528 Homo_sapiens_11_27630864-27632291-HERVHF-5LTR | - | 11   |         |  |
|    | 27617625 | 27634522 NONHSAT018513.2                               | - | 456  |         |  |
| 11 | 27629072 | 27629528 Homo_sapiens_11_27630864-27632291-HERVHF-5LTR | - | 11   |         |  |
|    | 27617625 | 27634627 NONHSAT018514.2                               | - | 456  |         |  |
| 11 | 27630027 | 27632049 Homo_sapiens_11_27630864-27632291-HERVHF-pol  | - | 11   |         |  |
|    | 27617625 | 27634522 NONHSAT018513.2                               | - | 2022 |         |  |
| 11 | 27630027 | 27632049 Homo_sapiens_11_27630864-27632291-HERVHF-pol  | - | 11   |         |  |
|    | 27617625 | 27634627 NONHSAT018514.2                               | - | 2022 |         |  |
| 11 | 27631507 | 27632340 Homo_sapiens_11_27630864-27632291-HERVHF-pro  | - | 11   |         |  |
|    | 27617625 | 27634522 NONHSAT018513.2                               | - | 833  |         |  |
| 11 | 27631507 | 27632340 Homo_sapiens_11_27630864-27632291-HERVHF-pro  | - | 11   |         |  |
|    | 27617625 | 27634627 NONHSAT018514.2                               | - | 833  |         |  |
| 11 | 27632416 | 27632889 Homo_sapiens_11_27630864-27632291-HERVHF-gag  | - | 11   |         |  |
|    | 27617625 | 27634522 NONHSAT018513.2                               | - | 473  |         |  |
| 11 | 27632416 | 27632889 Homo_sapiens_11_27630864-27632291-HERVHF-gag  | - | 11   |         |  |
|    | 27617625 | 27634627 NONHSAT018514.2                               | - | 473  |         |  |
| 11 | 27629072 | 27629528 Homo_sapiens_11_27630864-27632291-HERVHF-5LTR | - | 11   |         |  |
|    | 27617626 | 27634522 ENSG00000254934                               | - | 456  |         |  |
| 11 | 27629072 | 27629528 Homo_sapiens_11_27630864-27632291-HERVHF-5LTR | - | 11   |         |  |
|    | 27617626 | 27634628 NONHSAT160176.1                               | - | 456  |         |  |
| 11 | 27630027 | 27632049 Homo_sapiens_11_27630864-27632291-HERVHF-pol  | - | 11   |         |  |
|    | 27617626 | 27634522 ENSG00000254934                               | - | 2022 |         |  |
| 11 | 27630027 | 27632049 Homo_sapiens_11_27630864-27632291-HERVHF-pol  | - | 11   |         |  |

27617626 27634628 NONHSAT160176.1 - 2022

11 27631507 27632340 Homo\_sapiens\_11\_27630864-27632291-HERVHF-pro - 11  
27617626 27634522 ENSG00000254934 - 833

11 27631507 27632340 Homo\_sapiens\_11\_27630864-27632291-HERVHF-pro - 11  
27617626 27634628 NONHSAT160176.1 - 833

11 27632416 27632889 Homo\_sapiens\_11\_27630864-27632291-HERVHF-gag - 11  
27617626 27634522 ENSG00000254934 - 473

11 27632416 27632889 Homo\_sapiens\_11\_27630864-27632291-HERVHF-gag - 11  
27617626 27634628 NONHSAT160176.1 - 473

11 27629072 27629528 Homo\_sapiens\_11\_27630864-27632291-HERVHF-5LTR - 11  
27617992 27634627 NONHSAT018515.2 - 456

11 27630027 27632049 Homo\_sapiens\_11\_27630864-27632291-HERVHF-pol - 11  
27617992 27634627 NONHSAT018515.2 - 2022

11 27631507 27632340 Homo\_sapiens\_11\_27630864-27632291-HERVHF-pro - 11  
27617992 27634627 NONHSAT018515.2 - 833

11 27632416 27632889 Homo\_sapiens\_11\_27630864-27632291-HERVHF-gag - 11  
27617992 27634627 NONHSAT018515.2 - 473

11 27629072 27629528 Homo\_sapiens\_11\_27630864-27632291-HERVHF-5LTR - 11  
27617993 27634627 ENSG00000254934 - 456

11 27630027 27632049 Homo\_sapiens\_11\_27630864-27632291-HERVHF-pol - 11  
27617993 27634627 ENSG00000254934 - 2022

11 27631507 27632340 Homo\_sapiens\_11\_27630864-27632291-HERVHF-pro - 11  
27617993 27634627 ENSG00000254934 - 833

11 27632416 27632889 Homo\_sapiens\_11\_27630864-27632291-HERVHF-gag - 11  
27617993 27634627 ENSG00000254934 - 473

11 27629072 27629528 Homo\_sapiens\_11\_27630864-27632291-HERVHF-5LTR - 11  
27618025 27634551 NONHSAT018516.2 - 456

11 27629072 27629528 Homo\_sapiens\_11\_27630864-27632291-HERVHF-5LTR - 11  
27618025 27634551 NONHSAT018517.2 - 456

11 27630027 27632049 Homo\_sapiens\_11\_27630864-27632291-HERVHF-pol - 11  
27618025 27634551 NONHSAT018516.2 - 2022

11 27630027 27632049 Homo\_sapiens\_11\_27630864-27632291-HERVHF-pol - 11  
27618025 27634551 NONHSAT018517.2 - 2022

11 27631507 27632340 Homo\_sapiens\_11\_27630864-27632291-HERVHF-pro - 11  
27618025 27634551 NONHSAT018516.2 - 833

11 27631507 27632340 Homo\_sapiens\_11\_27630864-27632291-HERVHF-pro - 11  
27618025 27634551 NONHSAT018517.2 - 833

11 27632416 27632889 Homo\_sapiens\_11\_27630864-27632291-HERVHF-gag - 11  
27618025 27634551 NONHSAT018516.2 - 473

11 27632416 27632889 Homo\_sapiens\_11\_27630864-27632291-HERVHF-gag - 11  
27618025 27634551 NONHSAT018517.2 - 473

11 94641661 94647315 Homo\_sapiens\_11\_94644134-94645475-HERVHF + 11 94637790  
94651631 NONHSAG009399.3 + 5654

11 94641661 94642011 Homo\_sapiens\_11\_94644134-94645475-HERVHF-5LTR + 11

94637790 94651631 NONHSAG009399.3 + 350  
 11 94644136 94644915 Homo\_sapiens\_11\_94644134-94645475-HERVHF-pro + 11  
 94637790 94651631 NONHSAG009399.3 + 779  
 11 94644373 94646313 Homo\_sapiens\_11\_94644134-94645475-HERVHF-pol + 11  
 94637790 94651631 NONHSAG009399.3 + 1940  
 11 94646973 94647315 Homo\_sapiens\_11\_94644134-94645475-HERVHF-3LTR + 11  
 94637790 94651631 NONHSAG009399.3 + 342  
 11 94641661 94647315 Homo\_sapiens\_11\_94644134-94645475-HERVHF + 11 94638045  
 94652884 ENSG00000255666 + 5654  
 11 94641661 94642011 Homo\_sapiens\_11\_94644134-94645475-HERVHF-5LTR + 11  
 94638045 94652884 ENSG00000255666 + 350  
 11 94644136 94644915 Homo\_sapiens\_11\_94644134-94645475-HERVHF-pro + 11  
 94638045 94652884 ENSG00000255666 + 779  
 11 94644373 94646313 Homo\_sapiens\_11\_94644134-94645475-HERVHF-pol + 11  
 94638045 94652884 ENSG00000255666 + 1940  
 11 94646973 94647315 Homo\_sapiens\_11\_94644134-94645475-HERVHF-3LTR + 11  
 94638045 94652884 ENSG00000255666 + 342  
 11 94641661 94647315 Homo\_sapiens\_11\_94644134-94645475-HERVHF + 11 94638070  
 94651631 ENSG00000255666 + 5654  
 11 94641661 94642011 Homo\_sapiens\_11\_94644134-94645475-HERVHF-5LTR + 11  
 94638070 94651631 ENSG00000255666 + 350  
 11 94644136 94644915 Homo\_sapiens\_11\_94644134-94645475-HERVHF-pro + 11  
 94638070 94651631 ENSG00000255666 + 779  
 11 94644373 94646313 Homo\_sapiens\_11\_94644134-94645475-HERVHF-pol + 11  
 94638070 94651631 ENSG00000255666 + 1940  
 11 94646973 94647315 Homo\_sapiens\_11\_94644134-94645475-HERVHF-3LTR + 11  
 94638070 94651631 ENSG00000255666 + 342  
 11 94641661 94642011 Homo\_sapiens\_11\_94644134-94645475-HERVHF-5LTR + 11  
 94640098 94642192 NONHSAT230024.1 + 350  
 11 94644136 94644915 Homo\_sapiens\_11\_94644134-94645475-HERVHF-pro + 11  
 94641906 94651628 NONHSAT023734.2 + 779  
 11 94644373 94646313 Homo\_sapiens\_11\_94644134-94645475-HERVHF-pol + 11  
 94641906 94651628 NONHSAT023734.2 + 1940  
 11 94646973 94647315 Homo\_sapiens\_11\_94644134-94645475-HERVHF-3LTR + 11  
 94641906 94651628 NONHSAT023734.2 + 342  
 11 94644136 94644915 Homo\_sapiens\_11\_94644134-94645475-HERVHF-pro + 11  
 94641907 94651628 ENSG00000255666 + 779  
 11 94644373 94646313 Homo\_sapiens\_11\_94644134-94645475-HERVHF-pol + 11  
 94641907 94651628 ENSG00000255666 + 1940  
 11 94646973 94647315 Homo\_sapiens\_11\_94644134-94645475-HERVHF-3LTR + 11  
 94641907 94651628 ENSG00000255666 + 342  
 11 94644136 94644915 Homo\_sapiens\_11\_94644134-94645475-HERVHF-pro + 11  
 94641929 94648574 NONHSAT023735.2 + 779  
 11 94644373 94646313 Homo\_sapiens\_11\_94644134-94645475-HERVHF-pol + 11

|    |                                                                 |   |      |          |
|----|-----------------------------------------------------------------|---|------|----------|
|    | 94641929 94648574 NONHSAT023735.2                               | + | 1940 |          |
| 11 | 94646973 94647315 Homo_sapiens_11_94644134-94645475-HERVHF-3LTR | + | 11   |          |
|    | 94641929 94648574 NONHSAT023735.2                               | + | 342  |          |
| 11 | 94644136 94644915 Homo_sapiens_11_94644134-94645475-HERVHF-pro  | + | 11   |          |
|    | 94641930 94648574 ENSG00000255666                               | + | 779  |          |
| 11 | 94644373 94646313 Homo_sapiens_11_94644134-94645475-HERVHF-pol  | + | 11   |          |
|    | 94641930 94648574 ENSG00000255666                               | + | 1940 |          |
| 11 | 94646973 94647315 Homo_sapiens_11_94644134-94645475-HERVHF-3LTR | + | 11   |          |
|    | 94641930 94648574 ENSG00000255666                               | + | 342  |          |
| 11 | 96499960 96500271 Homo_sapiens_11_96501724-96503654-HERVHF-5LTR | + | 11   |          |
|    | 96389989 96507574 ENSG00000183340                               | + | 311  |          |
| 11 | 96501014 96501424 Homo_sapiens_11_96501724-96503654-HERVHF-gag  | + | 11   |          |
|    | 96389989 96507574 ENSG00000183340                               | + | 410  |          |
| 11 | 96501726 96502403 Homo_sapiens_11_96501724-96503654-HERVHF-pro  | + | 11   |          |
|    | 96389989 96507574 ENSG00000183340                               | + | 677  |          |
| 11 | 96501900 96504947 Homo_sapiens_11_96501724-96503654-HERVHF-pol  | + | 11   |          |
|    | 96389989 96507574 ENSG00000183340                               | + | 3047 |          |
| 11 | 96506073 96506627 Homo_sapiens_11_96501724-96503654-HERVHF-env  | + | 11   |          |
|    | 96389989 96507574 ENSG00000183340                               | + | 554  |          |
| 11 | 96587635 96588088 Homo_sapiens_11_96590449-96591982-HERVHF-5LTR | + | 11   |          |
|    | 96579577 96593188 NONHSAG009431.2                               | + | 453  |          |
| 11 | 96587635 96588088 Homo_sapiens_11_96590449-96591982-HERVHF-5LTR | + | 11   |          |
|    | 96579577 96593188 NONHSAT023810.2                               | + | 453  |          |
| 11 | 96590439 96591233 Homo_sapiens_11_96590449-96591982-HERVHF-pro  | + | 11   |          |
|    | 96579577 96593188 NONHSAG009431.2                               | + | 794  |          |
| 11 | 96590439 96591233 Homo_sapiens_11_96590449-96591982-HERVHF-pro  | + | 11   |          |
|    | 96579577 96593188 NONHSAT023810.2                               | + | 794  |          |
| 11 | 96590598 96592771 Homo_sapiens_11_96590449-96591982-HERVHF-pol  | + | 11   |          |
|    | 96579577 96593188 NONHSAG009431.2                               | + | 2173 |          |
| 11 | 96590598 96592771 Homo_sapiens_11_96590449-96591982-HERVHF-pol  | + | 11   |          |
|    | 96579577 96593188 NONHSAT023810.2                               | + | 2173 |          |
| 11 | 96587635 96593677 Homo_sapiens_11_96590449-96591982-HERVHF      | + | 11   | 96587796 |
|    | 96588978 NONHSAT159567.1                                        | + | 1182 |          |
| 11 | 96590439 96591233 Homo_sapiens_11_96590449-96591982-HERVHF-pro  | + | 11   |          |
|    | 96587796 96596592 NONHSAG009432.2                               | + | 794  |          |
| 11 | 96590439 96591233 Homo_sapiens_11_96590449-96591982-HERVHF-pro  | + | 11   |          |
|    | 96587796 96596592 NONHSAT023811.2                               | + | 794  |          |
| 11 | 96590598 96592771 Homo_sapiens_11_96590449-96591982-HERVHF-pol  | + | 11   |          |
|    | 96587796 96596592 NONHSAG009432.2                               | + | 2173 |          |
| 11 | 96590598 96592771 Homo_sapiens_11_96590449-96591982-HERVHF-pol  | + | 11   |          |
|    | 96587796 96596592 NONHSAT023811.2                               | + | 2173 |          |
| 11 | 96593224 96593677 Homo_sapiens_11_96590449-96591982-HERVHF-3LTR | + | 11   |          |
|    | 96587796 96596592 NONHSAG009432.2                               | + | 453  |          |
| 11 | 96593224 96593677 Homo_sapiens_11_96590449-96591982-HERVHF-3LTR | + | 11   |          |



96587796 96596592 NONHSAT023811.2+ 453

11 96590439 96591233 Homo\_sapiens\_11\_96590449-96591982-HERVHF-pro + 11  
96590316 96713822 NONHSAG009434.2 + 794

11 96590439 96591233 Homo\_sapiens\_11\_96590449-96591982-HERVHF-pro + 11  
96590316 96713822 NONHSAT023813.2 + 794

11 96590598 96592771 Homo\_sapiens\_11\_96590449-96591982-HERVHF-pol + 11  
96590316 96713822 NONHSAG009434.2 + 2173

11 96590598 96592771 Homo\_sapiens\_11\_96590449-96591982-HERVHF-pol + 11  
96590316 96713822 NONHSAT023813.2 + 2173

11 96593224 96593677 Homo\_sapiens\_11\_96590449-96591982-HERVHF-3LTR + 11  
96590316 96713822 NONHSAG009434.2 + 453

11 96593224 96593677 Homo\_sapiens\_11\_96590449-96591982-HERVHF-3LTR + 11  
96590316 96713822 NONHSAT023813.2 + 453

11 96590439 96591233 Homo\_sapiens\_11\_96590449-96591982-HERVHF-pro + 11  
96590317 96713822 ENSG00000254587 + 794

11 96590598 96592771 Homo\_sapiens\_11\_96590449-96591982-HERVHF-pol + 11  
96590317 96713822 ENSG00000254587 + 2173

11 96593224 96593677 Homo\_sapiens\_11\_96590449-96591982-HERVHF-3LTR + 11  
96590317 96713822 ENSG00000254587 + 453

11 130565609 130567330 Homo\_sapiens\_11\_130566060-130567548-HERVHF-pol -  
11 130564429 130758600 NONHSAG010050.2 - 1721

11 130565609 130567330 Homo\_sapiens\_11\_130566060-130567548-HERVHF-pol -  
11 130564429 130758600 NONHSAT025134.2 - 1721

11 130566809 130567627 Homo\_sapiens\_11\_130566060-130567548-HERVHF-pro -  
11 130564429 130758600 NONHSAG010050.2 - 818

11 130566809 130567627 Homo\_sapiens\_11\_130566060-130567548-HERVHF-pro -  
11 130564429 130758600 NONHSAT025134.2 - 818

11 130569681 130570121 Homo\_sapiens\_11\_130566060-130567548-HERVHF-3LTR -  
11 130564429 130758600 NONHSAG010050.2 - 440

11 130569681 130570121 Homo\_sapiens\_11\_130566060-130567548-HERVHF-3LTR -  
11 130564429 130758600 NONHSAT025134.2 - 440

11 130753494 130753946 Homo\_sapiens\_11\_130755373-130756704-HERVHF-5LTR -  
11 130564429 130758600 NONHSAG010050.2 - 452

11 130753494 130753946 Homo\_sapiens\_11\_130755373-130756704-HERVHF-5LTR -  
11 130564429 130758600 NONHSAT025134.2 - 452

11 130754355 130756582 Homo\_sapiens\_11\_130755373-130756704-HERVHF-pol -  
11 130564429 130758600 NONHSAG010050.2 - 2227

11 130754355 130756582 Homo\_sapiens\_11\_130755373-130756704-HERVHF-pol -  
11 130564429 130758600 NONHSAT025134.2 - 2227

11 130755941 130756702 Homo\_sapiens\_11\_130755373-130756704-HERVHF-pro -  
11 130564429 130758600 NONHSAG010050.2 - 761

11 130755941 130756702 Homo\_sapiens\_11\_130755373-130756704-HERVHF-pro -  
11 130564429 130758600 NONHSAT025134.2 - 761

12 4018623 4023691 Homo\_sapiens\_12\_4021109-4022208-HERVHF + 12 4012902

|    |         |                                                     |   |      |         |  |
|----|---------|-----------------------------------------------------|---|------|---------|--|
|    | 4026658 | ENSG00000256969                                     | + | 5068 |         |  |
| 12 | 4018623 | 4018993 Homo_sapiens_12_4021109-4022208-HERVHF-5LTR | + | 12   | 4012902 |  |
|    | 4026658 | ENSG00000256969                                     | + | 370  |         |  |
| 12 | 4020593 | 4021006 Homo_sapiens_12_4021109-4022208-HERVHF-gag  | + | 12   | 4012902 |  |
|    | 4026658 | ENSG00000256969                                     | + | 413  |         |  |
| 12 | 4021003 | 4021665 Homo_sapiens_12_4021109-4022208-HERVHF-pro  | + | 12   | 4012902 |  |
|    | 4026658 | ENSG00000256969                                     | + | 662  |         |  |
| 12 | 4021511 | 4022836 Homo_sapiens_12_4021109-4022208-HERVHF-pol  | + | 12   | 4012902 |  |
|    | 4026658 | ENSG00000256969                                     | + | 1325 |         |  |
| 12 | 4023325 | 4023691 Homo_sapiens_12_4021109-4022208-HERVHF-3LTR | + | 12   | 4012902 |  |
|    | 4026658 | ENSG00000256969                                     | + | 366  |         |  |
| 12 | 4018623 | 4023691 Homo_sapiens_12_4021109-4022208-HERVHF      | + | 12   | 4012903 |  |
|    | 4026657 | ENSG00000256969                                     | + | 5068 |         |  |
| 12 | 4018623 | 4018993 Homo_sapiens_12_4021109-4022208-HERVHF-5LTR | + | 12   | 4012903 |  |
|    | 4026657 | ENSG00000256969                                     | + | 370  |         |  |
| 12 | 4020593 | 4021006 Homo_sapiens_12_4021109-4022208-HERVHF-gag  | + | 12   | 4012903 |  |
|    | 4026657 | ENSG00000256969                                     | + | 413  |         |  |
| 12 | 4021003 | 4021665 Homo_sapiens_12_4021109-4022208-HERVHF-pro  | + | 12   | 4012903 |  |
|    | 4026657 | ENSG00000256969                                     | + | 662  |         |  |
| 12 | 4021511 | 4022836 Homo_sapiens_12_4021109-4022208-HERVHF-pol  | + | 12   | 4012903 |  |
|    | 4026657 | ENSG00000256969                                     | + | 1325 |         |  |
| 12 | 4023325 | 4023691 Homo_sapiens_12_4021109-4022208-HERVHF-3LTR | + | 12   | 4012903 |  |
|    | 4026657 | ENSG00000256969                                     | + | 366  |         |  |
| 12 | 4020593 | 4021006 Homo_sapiens_12_4021109-4022208-HERVHF-gag  | + | 12   | 4019113 |  |
|    | 4026890 | NONHSAG010232.2                                     | + | 413  |         |  |
| 12 | 4020593 | 4021006 Homo_sapiens_12_4021109-4022208-HERVHF-gag  | + | 12   | 4019113 |  |
|    | 4026890 | NONHSAT025939.2                                     | + | 413  |         |  |
| 12 | 4021003 | 4021665 Homo_sapiens_12_4021109-4022208-HERVHF-pro  | + | 12   | 4019113 |  |
|    | 4026890 | NONHSAG010232.2                                     | + | 662  |         |  |
| 12 | 4021003 | 4021665 Homo_sapiens_12_4021109-4022208-HERVHF-pro  | + | 12   | 4019113 |  |
|    | 4026890 | NONHSAT025939.2                                     | + | 662  |         |  |
| 12 | 4021511 | 4022836 Homo_sapiens_12_4021109-4022208-HERVHF-pol  | + | 12   | 4019113 |  |
|    | 4026890 | NONHSAG010232.2                                     | + | 1325 |         |  |
| 12 | 4021511 | 4022836 Homo_sapiens_12_4021109-4022208-HERVHF-pol  | + | 12   | 4019113 |  |
|    | 4026890 | NONHSAT025939.2                                     | + | 1325 |         |  |
| 12 | 4023325 | 4023691 Homo_sapiens_12_4021109-4022208-HERVHF-3LTR | + | 12   | 4019113 |  |
|    | 4026890 | NONHSAG010232.2                                     | + | 366  |         |  |
| 12 | 4023325 | 4023691 Homo_sapiens_12_4021109-4022208-HERVHF-3LTR | + | 12   | 4019113 |  |
|    | 4026890 | NONHSAT025939.2                                     | + | 366  |         |  |
| 12 | 4021003 | 4021665 Homo_sapiens_12_4021109-4022208-HERVHF-pro  | + | 12   | 4020976 |  |
|    | 4026658 | NONHSAT025940.2                                     | + | 662  |         |  |
| 12 | 4021511 | 4022836 Homo_sapiens_12_4021109-4022208-HERVHF-pol  | + | 12   | 4020976 |  |
|    | 4026658 | NONHSAT025940.2                                     | + | 1325 |         |  |
| 12 | 4023325 | 4023691 Homo_sapiens_12_4021109-4022208-HERVHF-3LTR | + | 12   | 4020976 |  |

|    |          |                                                         |      |      |          |  |
|----|----------|---------------------------------------------------------|------|------|----------|--|
|    | 4026658  | NONHSAT025940.2                                         | +    | 366  |          |  |
| 12 | 4021003  | 4021665 Homo_sapiens_12_4021109-4022208-HERVHF-pro      | +    | 12   | 4020977  |  |
|    | 4026658  | ENSG00000256969 +                                       | 662  |      |          |  |
| 12 | 4021003  | 4021665 Homo_sapiens_12_4021109-4022208-HERVHF-pro      | +    | 12   | 4020977  |  |
|    | 4026659  | NONHSAT161751.1                                         | +    | 662  |          |  |
| 12 | 4021511  | 4022836 Homo_sapiens_12_4021109-4022208-HERVHF-pol      | +    | 12   | 4020977  |  |
|    | 4026658  | ENSG00000256969 +                                       | 1325 |      |          |  |
| 12 | 4021511  | 4022836 Homo_sapiens_12_4021109-4022208-HERVHF-pol      | +    | 12   | 4020977  |  |
|    | 4026659  | NONHSAT161751.1                                         | +    | 1325 |          |  |
| 12 | 4023325  | 4023691 Homo_sapiens_12_4021109-4022208-HERVHF-3LTR     | +    | 12   | 4020977  |  |
|    | 4026658  | ENSG00000256969 +                                       | 366  |      |          |  |
| 12 | 4023325  | 4023691 Homo_sapiens_12_4021109-4022208-HERVHF-3LTR     | +    | 12   | 4020977  |  |
|    | 4026659  | NONHSAT161751.1                                         | +    | 366  |          |  |
| 12 | 11462168 | 11468022 Homo_sapiens_12_11463877-11465381-HERVHF       | -    | 12   | 11393972 |  |
|    | 11501041 | ENSG00000121335 -                                       | 5854 |      |          |  |
| 12 | 11462168 | 11462625 Homo_sapiens_12_11463877-11465381-HERVHF-5LTR- |      | 12   |          |  |
|    | 11393972 | 11501041 ENSG00000121335 -                              | 457  |      |          |  |
| 12 | 11463071 | 11465137 Homo_sapiens_12_11463877-11465381-HERVHF-pol   | -    | 12   |          |  |
|    | 11393972 | 11501041 ENSG00000121335 -                              | 2066 |      |          |  |
| 12 | 11467569 | 11468022 Homo_sapiens_12_11463877-11465381-HERVHF-3LTR- |      | 12   |          |  |
|    | 11393972 | 11501041 ENSG00000121335 -                              | 453  |      |          |  |
| 12 | 11462168 | 11468022 Homo_sapiens_12_11463877-11465381-HERVHF       | -    | 12   | 11398707 |  |
|    | 11486679 | NONHSAG010510.2                                         | -    | 5854 |          |  |
| 12 | 11462168 | 11462625 Homo_sapiens_12_11463877-11465381-HERVHF-5LTR- |      | 12   |          |  |
|    | 11398707 | 11486679 NONHSAG010510.2                                | -    | 457  |          |  |
| 12 | 11462168 | 11468022 Homo_sapiens_12_11463877-11465381-HERVHF       | -    | 12   | 11398707 |  |
|    | 11486679 | NONHSAT163315.1                                         | -    | 5854 |          |  |
| 12 | 11462168 | 11462625 Homo_sapiens_12_11463877-11465381-HERVHF-5LTR- |      | 12   |          |  |
|    | 11398707 | 11486679 NONHSAT163315.1                                | -    | 457  |          |  |
| 12 | 11463071 | 11465137 Homo_sapiens_12_11463877-11465381-HERVHF-pol   | -    | 12   |          |  |
|    | 11398707 | 11486679 NONHSAG010510.2                                | -    | 2066 |          |  |
| 12 | 11463071 | 11465137 Homo_sapiens_12_11463877-11465381-HERVHF-pol   | -    | 12   |          |  |
|    | 11398707 | 11486679 NONHSAT163315.1                                | -    | 2066 |          |  |
| 12 | 11467569 | 11468022 Homo_sapiens_12_11463877-11465381-HERVHF-3LTR- |      | 12   |          |  |
|    | 11398707 | 11486679 NONHSAG010510.2                                | -    | 453  |          |  |
| 12 | 11467569 | 11468022 Homo_sapiens_12_11463877-11465381-HERVHF-3LTR- |      | 12   |          |  |
|    | 11398707 | 11486679 NONHSAT163315.1                                | -    | 453  |          |  |
| 12 | 11462168 | 11468022 Homo_sapiens_12_11463877-11465381-HERVHF       | -    | 12   | 11399380 |  |
|    | 11486678 | NONHSAT026937.2                                         | -    | 5854 |          |  |
| 12 | 11462168 | 11462625 Homo_sapiens_12_11463877-11465381-HERVHF-5LTR- |      | 12   |          |  |
|    | 11399380 | 11486678 NONHSAT026937.2                                | -    | 457  |          |  |
| 12 | 11463071 | 11465137 Homo_sapiens_12_11463877-11465381-HERVHF-pol   | -    | 12   |          |  |
|    | 11399380 | 11486678 NONHSAT026937.2                                | -    | 2066 |          |  |
| 12 | 11467569 | 11468022 Homo_sapiens_12_11463877-11465381-HERVHF-3LTR- |      | 12   |          |  |

11399380 11486678 NONHSAT026937.2 - 453  
 12 11462168 11468022 Homo\_sapiens\_12\_11463877-11465381-HERVHF - 12 11399381  
 11486678 ENSG00000255790 - 5854  
 12 11462168 11462625 Homo\_sapiens\_12\_11463877-11465381-HERVHF-5LTR- 12  
 11399381 11486678 ENSG00000255790 - 457  
 12 11463071 11465137 Homo\_sapiens\_12\_11463877-11465381-HERVHF-pol - 12  
 11399381 11486678 ENSG00000255790 - 2066  
 12 11467569 11468022 Homo\_sapiens\_12\_11463877-11465381-HERVHF-3LTR- 12  
 11399381 11486678 ENSG00000255790 - 453  
 12 11462168 11468022 Homo\_sapiens\_12\_11463877-11465381-HERVHF - 12 11401484  
 11486674 NONHSAT026938.2 - 5854  
 12 11462168 11462625 Homo\_sapiens\_12\_11463877-11465381-HERVHF-5LTR- 12  
 11401484 11486674 NONHSAT026938.2 - 457  
 12 11463071 11465137 Homo\_sapiens\_12\_11463877-11465381-HERVHF-pol - 12  
 11401484 11486674 NONHSAT026938.2 - 2066  
 12 11467569 11468022 Homo\_sapiens\_12\_11463877-11465381-HERVHF-3LTR- 12  
 11401484 11486674 NONHSAT026938.2 - 453  
 12 11462168 11468022 Homo\_sapiens\_12\_11463877-11465381-HERVHF - 12 11401485  
 11486674 ENSG00000255790 - 5854  
 12 11462168 11462625 Homo\_sapiens\_12\_11463877-11465381-HERVHF-5LTR- 12  
 11401485 11486674 ENSG00000255790 - 457  
 12 11463071 11465137 Homo\_sapiens\_12\_11463877-11465381-HERVHF-pol - 12  
 11401485 11486674 ENSG00000255790 - 2066  
 12 11467569 11468022 Homo\_sapiens\_12\_11463877-11465381-HERVHF-3LTR- 12  
 11401485 11486674 ENSG00000255790 - 453  
 12 11462168 11468022 Homo\_sapiens\_12\_11463877-11465381-HERVHF - 12 11430215  
 11486708 ENSG00000255790 - 5854  
 12 11462168 11462625 Homo\_sapiens\_12\_11463877-11465381-HERVHF-5LTR- 12  
 11430215 11486708 ENSG00000255790 - 457  
 12 11463071 11465137 Homo\_sapiens\_12\_11463877-11465381-HERVHF-pol - 12  
 11430215 11486708 ENSG00000255790 - 2066  
 12 11467569 11468022 Homo\_sapiens\_12\_11463877-11465381-HERVHF-3LTR- 12  
 11430215 11486708 ENSG00000255790 - 453  
 12 11462168 11468022 Homo\_sapiens\_12\_11463877-11465381-HERVHF - 12 11430361  
 11486632 NONHSAT026942.2 - 5854  
 12 11462168 11462625 Homo\_sapiens\_12\_11463877-11465381-HERVHF-5LTR- 12  
 11430361 11486632 NONHSAT026942.2 - 457  
 12 11463071 11465137 Homo\_sapiens\_12\_11463877-11465381-HERVHF-pol - 12  
 11430361 11486632 NONHSAT026942.2 - 2066  
 12 11467569 11468022 Homo\_sapiens\_12\_11463877-11465381-HERVHF-3LTR- 12  
 11430361 11486632 NONHSAT026942.2 - 453  
 12 11462168 11468022 Homo\_sapiens\_12\_11463877-11465381-HERVHF - 12 11430362  
 11486632 ENSG00000255790 - 5854  
 12 11462168 11462625 Homo\_sapiens\_12\_11463877-11465381-HERVHF-5LTR- 12

|    |                                                                  |        |             |
|----|------------------------------------------------------------------|--------|-------------|
|    | 11430362 11486632 ENSG00000255790 -                              | 457    |             |
| 12 | 11463071 11465137 Homo_sapiens_12_11463877-11465381-HERVHF-pol   | -      | 12          |
|    | 11430362 11486632 ENSG00000255790 -                              | 2066   |             |
| 12 | 11467569 11468022 Homo_sapiens_12_11463877-11465381-HERVHF-3LTR- |        | 12          |
|    | 11430362 11486632 ENSG00000255790 -                              | 453    |             |
| 12 | 34269097 34271546 Homo_sapiens_12_34268101-34269869-HERVHF-pol   | +      | 12          |
|    | 34269048 34278082 NONHSAG010874.2                                | + 2449 |             |
| 12 | 34269097 34271546 Homo_sapiens_12_34268101-34269869-HERVHF-pol   | +      | 12          |
|    | 34269048 34278082 NONHSAT027661.2                                | + 2449 |             |
| 12 | 34272421 34273596 Homo_sapiens_12_34268101-34269869-HERVHF-env   | +      | 12          |
|    | 34269048 34278082 NONHSAG010874.2                                | + 1175 |             |
| 12 | 34272421 34273596 Homo_sapiens_12_34268101-34269869-HERVHF-env   | +      | 12          |
|    | 34269048 34278082 NONHSAT027661.2                                | + 1175 |             |
| 12 | 34273840 34274242 Homo_sapiens_12_34268101-34269869-HERVHF-3LTR  | +      | 12          |
|    | 34269048 34278082 NONHSAG010874.2                                | + 402  |             |
| 12 | 34273840 34274242 Homo_sapiens_12_34268101-34269869-HERVHF-3LTR  | +      | 12          |
|    | 34269048 34278082 NONHSAT027661.2                                | + 402  |             |
| 12 | 70444894 70450107 Homo_sapiens_12_70446553-70447732-HERVK        | -      | 12 70446459 |
|    | 70447585 NONHSAG011664.2                                         | - 1126 |             |
| 12 | 70444894 70450107 Homo_sapiens_12_70446553-70447732-HERVK        | -      | 12 70446459 |
|    | 70447585 NONHSAT029412.2                                         | - 1126 |             |
| 12 | 70445322 70447607 Homo_sapiens_12_70446553-70447732-HERVK-pol    | -      | 12          |
|    | 70446459 70447585 NONHSAG011664.2                                | - 1126 |             |
| 12 | 70445322 70447607 Homo_sapiens_12_70446553-70447732-HERVK-pol    | -      | 12          |
|    | 70446459 70447585 NONHSAT029412.2                                | - 1126 |             |
| 12 | 86941530 86943723 Homo_sapiens_12_86941432-86943069-HERVHF-pol   | +      | 12          |
|    | 86941138 86964891 NONHSAG064903.1                                | + 2193 |             |
| 12 | 86941530 86943723 Homo_sapiens_12_86941432-86943069-HERVHF-pol   | +      | 12          |
|    | 86941138 86964891 NONHSAT162510.1                                | + 2193 |             |
| 12 | 86944355 86944748 Homo_sapiens_12_86941432-86943069-HERVHF-3LTR  | +      | 12          |
|    | 86941138 86964891 NONHSAG064903.1                                | + 393  |             |
| 12 | 86944355 86944748 Homo_sapiens_12_86941432-86943069-HERVHF-3LTR  | +      | 12          |
|    | 86941138 86964891 NONHSAT162510.1                                | + 393  |             |
| 13 | 42868001 42868452 Homo_sapiens_13_42869513-42870545-HERVHF-5LTR  | -      | 13          |
|    | 42840531 42872900 NONHSAG013351.2                                | - 451  |             |
| 13 | 42868001 42868452 Homo_sapiens_13_42869513-42870545-HERVHF-5LTR  | -      | 13          |
|    | 42840531 42872900 NONHSAT033441.2                                | - 451  |             |
| 13 | 42869058 42870339 Homo_sapiens_13_42869513-42870545-HERVHF-pol   | -      | 13          |
|    | 42840531 42872900 NONHSAG013351.2                                | - 1281 |             |
| 13 | 42869058 42870339 Homo_sapiens_13_42869513-42870545-HERVHF-pol   | -      | 13          |
|    | 42840531 42872900 NONHSAT033441.2                                | - 1281 |             |
| 13 | 42869842 42870594 Homo_sapiens_13_42869513-42870545-HERVHF-pro   | -      | 13          |
|    | 42840531 42872900 NONHSAG013351.2                                | - 752  |             |
| 13 | 42869842 42870594 Homo_sapiens_13_42869513-42870545-HERVHF-pro   | -      | 13          |

|    |                                                                 |   |      |          |
|----|-----------------------------------------------------------------|---|------|----------|
|    | 42840531 42872900 NONHSAT033441.2                               | - | 752  |          |
| 13 | 42870678 42871007 Homo_sapiens_13_42869513-42870545-HERVHF-gag  | - | 13   |          |
|    | 42840531 42872900 NONHSAG013351.2                               | - | 329  |          |
| 13 | 42870678 42871007 Homo_sapiens_13_42869513-42870545-HERVHF-gag  | - | 13   |          |
|    | 42840531 42872900 NONHSAT033441.2                               | - | 329  |          |
| 13 | 42868001 42868452 Homo_sapiens_13_42869513-42870545-HERVHF-5LTR | - | 13   |          |
|    | 42842411 42872744 NONHSAT166672.1                               | - | 451  |          |
| 13 | 42869058 42870339 Homo_sapiens_13_42869513-42870545-HERVHF-pol  | - | 13   |          |
|    | 42842411 42872744 NONHSAT166672.1                               | - | 1281 |          |
| 13 | 42869842 42870594 Homo_sapiens_13_42869513-42870545-HERVHF-pro  | - | 13   |          |
|    | 42842411 42872744 NONHSAT166672.1                               | - | 752  |          |
| 13 | 42870678 42871007 Homo_sapiens_13_42869513-42870545-HERVHF-gag  | - | 13   |          |
|    | 42842411 42872744 NONHSAT166672.1                               | - | 329  |          |
| 13 | 42868001 42868452 Homo_sapiens_13_42869513-42870545-HERVHF-5LTR | - | 13   |          |
|    | 42850246 42872744 NONHSAT166675.1                               | - | 451  |          |
| 13 | 42869058 42870339 Homo_sapiens_13_42869513-42870545-HERVHF-pol  | - | 13   |          |
|    | 42850246 42872744 NONHSAT166675.1                               | - | 1281 |          |
| 13 | 42869842 42870594 Homo_sapiens_13_42869513-42870545-HERVHF-pro  | - | 13   |          |
|    | 42850246 42872744 NONHSAT166675.1                               | - | 752  |          |
| 13 | 42870678 42871007 Homo_sapiens_13_42869513-42870545-HERVHF-gag  | - | 13   |          |
|    | 42850246 42872744 NONHSAT166675.1                               | - | 329  |          |
| 13 | 48866771 48872457 Homo_sapiens_13_48868391-48870330-HERVHF      | - | 13   | 48854720 |
|    | 48874381 NONHSAG067525.1                                        | - | 5686 |          |
| 13 | 48866771 48867093 Homo_sapiens_13_48868391-48870330-HERVHF-5LTR | - | 13   |          |
|    | 48854720 48874381 NONHSAG067525.1                               | - | 322  |          |
| 13 | 48866771 48872457 Homo_sapiens_13_48868391-48870330-HERVHF      | - | 13   | 48854720 |
|    | 48874381 NONHSAT166751.1                                        | - | 5686 |          |
| 13 | 48866771 48867093 Homo_sapiens_13_48868391-48870330-HERVHF-5LTR | - | 13   |          |
|    | 48854720 48874381 NONHSAT166751.1                               | - | 322  |          |
| 13 | 48868555 48870047 Homo_sapiens_13_48868391-48870330-HERVHF-pol  | - | 13   |          |
|    | 48854720 48874381 NONHSAG067525.1                               | - | 1492 |          |
| 13 | 48868555 48870047 Homo_sapiens_13_48868391-48870330-HERVHF-pol  | - | 13   |          |
|    | 48854720 48874381 NONHSAT166751.1                               | - | 1492 |          |
| 13 | 48869643 48870272 Homo_sapiens_13_48868391-48870330-HERVHF-pro  | - | 13   |          |
|    | 48854720 48874381 NONHSAG067525.1                               | - | 629  |          |
| 13 | 48869643 48870272 Homo_sapiens_13_48868391-48870330-HERVHF-pro  | - | 13   |          |
|    | 48854720 48874381 NONHSAT166751.1                               | - | 629  |          |
| 13 | 48872132 48872457 Homo_sapiens_13_48868391-48870330-HERVHF-3LTR | - | 13   |          |
|    | 48854720 48874381 NONHSAG067525.1                               | - | 325  |          |
| 13 | 48872132 48872457 Homo_sapiens_13_48868391-48870330-HERVHF-3LTR | - | 13   |          |
|    | 48854720 48874381 NONHSAT166751.1                               | - | 325  |          |
| 13 | 51169866 51175008 Homo_sapiens_13_51172521-51173517-HERVHF      | + | 13   | 51169742 |
|    | 51187944 NONHSAG013541.3                                        | + | 5142 |          |
| 13 | 51169866 51170315 Homo_sapiens_13_51172521-51173517-HERVHF-5LTR | + | 13   |          |

|    |                                                                  |   |      |          |
|----|------------------------------------------------------------------|---|------|----------|
|    | 51169742 51187944 NONHSAG013541.3                                | + | 449  |          |
| 13 | 51169866 51175008 Homo_sapiens_13_51172521-51173517-HERVHF       | + | 13   | 51169742 |
|    | 51176200 NONHSAT232794.1                                         | + | 5142 |          |
| 13 | 51169866 51170315 Homo_sapiens_13_51172521-51173517-HERVHF-5LTR+ |   | 13   |          |
|    | 51169742 51176200 NONHSAT232794.1                                | + | 449  |          |
| 13 | 51172014 51172343 Homo_sapiens_13_51172521-51173517-HERVHF-gag   | + | 13   |          |
|    | 51169742 51187944 NONHSAG013541.3                                | + | 329  |          |
| 13 | 51172014 51172343 Homo_sapiens_13_51172521-51173517-HERVHF-gag   | + | 13   |          |
|    | 51169742 51176200 NONHSAT232794.1                                | + | 329  |          |
| 13 | 51172529 51173197 Homo_sapiens_13_51172521-51173517-HERVHF-pro   | + | 13   |          |
|    | 51169742 51187944 NONHSAG013541.3                                | + | 668  |          |
| 13 | 51172529 51173197 Homo_sapiens_13_51172521-51173517-HERVHF-pro   | + | 13   |          |
|    | 51169742 51176200 NONHSAT232794.1                                | + | 668  |          |
| 13 | 51172592 51174102 Homo_sapiens_13_51172521-51173517-HERVHF-pol   | + | 13   |          |
|    | 51169742 51187944 NONHSAG013541.3                                | + | 1510 |          |
| 13 | 51172592 51174102 Homo_sapiens_13_51172521-51173517-HERVHF-pol   | + | 13   |          |
|    | 51169742 51176200 NONHSAT232794.1                                | + | 1510 |          |
| 13 | 51174556 51175008 Homo_sapiens_13_51172521-51173517-HERVHF-3LTR+ |   | 13   |          |
|    | 51169742 51187944 NONHSAG013541.3                                | + | 452  |          |
| 13 | 51174556 51175008 Homo_sapiens_13_51172521-51173517-HERVHF-3LTR+ |   | 13   |          |
|    | 51169742 51176200 NONHSAT232794.1                                | + | 452  |          |
| 13 | 51172014 51172343 Homo_sapiens_13_51172521-51173517-HERVHF-gag   | + | 13   |          |
|    | 51169990 51187944 NONHSAT033887.2                                | + | 329  |          |
| 13 | 51172529 51173197 Homo_sapiens_13_51172521-51173517-HERVHF-pro   | + | 13   |          |
|    | 51169990 51187944 NONHSAT033887.2                                | + | 668  |          |
| 13 | 51172592 51174102 Homo_sapiens_13_51172521-51173517-HERVHF-pol   | + | 13   |          |
|    | 51169990 51187944 NONHSAT033887.2                                | + | 1510 |          |
| 13 | 51174556 51175008 Homo_sapiens_13_51172521-51173517-HERVHF-3LTR+ |   | 13   |          |
|    | 51169990 51187944 NONHSAT033887.2                                | + | 452  |          |
| 13 | 54127417 54127817 Homo_sapiens_13_54129305-54130960-HERVHF-5LTR  | - | 13   |          |
|    | 54108833 54132891 NONHSAG013596.3                                | - | 400  |          |
| 13 | 54127417 54127817 Homo_sapiens_13_54129305-54130960-HERVHF-5LTR  | - | 13   |          |
|    | 54108833 54132891 NONHSAT233261.1                                | - | 400  |          |
| 13 | 54128407 54130751 Homo_sapiens_13_54129305-54130960-HERVHF-pol   | - | 13   |          |
|    | 54108833 54132891 NONHSAG013596.3                                | - | 2344 |          |
| 13 | 54128407 54130751 Homo_sapiens_13_54129305-54130960-HERVHF-pol   | - | 13   |          |
|    | 54108833 54132891 NONHSAT233261.1                                | - | 2344 |          |
| 13 | 54130113 54130865 Homo_sapiens_13_54129305-54130960-HERVHF-pro   | - | 13   |          |
|    | 54108833 54132891 NONHSAG013596.3                                | - | 752  |          |
| 13 | 54130113 54130865 Homo_sapiens_13_54129305-54130960-HERVHF-pro   | - | 13   |          |
|    | 54108833 54132891 NONHSAT233261.1                                | - | 752  |          |
| 13 | 54130954 54131292 Homo_sapiens_13_54129305-54130960-HERVHF-gag   | - | 13   |          |
|    | 54108833 54132891 NONHSAG013596.3                                | - | 338  |          |
| 13 | 54130954 54131292 Homo_sapiens_13_54129305-54130960-HERVHF-gag   | - | 13   |          |

54108833 54132891 NONHSAT233261.1 - 338

13 54127417 54127817 Homo\_sapiens\_13\_54129305-54130960-HERVHF-5LTR - 13  
54110836 54131272 NONHSAT034023.2 - 400

13 54128407 54130751 Homo\_sapiens\_13\_54129305-54130960-HERVHF-pol - 13  
54110836 54131272 NONHSAT034023.2 - 2344

13 54130113 54130865 Homo\_sapiens\_13\_54129305-54130960-HERVHF-pro - 13  
54110836 54131272 NONHSAT034023.2 - 752

13 54127417 54127817 Homo\_sapiens\_13\_54129305-54130960-HERVHF-5LTR - 13  
54113862 54132891 NONHSAT233262.1 - 400

13 54128407 54130751 Homo\_sapiens\_13\_54129305-54130960-HERVHF-pol - 13  
54113862 54132891 NONHSAT233262.1 - 2344

13 54130113 54130865 Homo\_sapiens\_13\_54129305-54130960-HERVHF-pro - 13  
54113862 54132891 NONHSAT233262.1 - 752

13 54130954 54131292 Homo\_sapiens\_13\_54129305-54130960-HERVHF-gag - 13  
54113862 54132891 NONHSAT233262.1 - 338

13 54127417 54127817 Homo\_sapiens\_13\_54129305-54130960-HERVHF-5LTR - 13  
54114978 54132891 NONHSAT233263.1 - 400

13 54128407 54130751 Homo\_sapiens\_13\_54129305-54130960-HERVHF-pol - 13  
54114978 54132891 NONHSAT233263.1 - 2344

13 54130113 54130865 Homo\_sapiens\_13\_54129305-54130960-HERVHF-pro - 13  
54114978 54132891 NONHSAT233263.1 - 752

13 54130954 54131292 Homo\_sapiens\_13\_54129305-54130960-HERVHF-gag - 13  
54114978 54132891 NONHSAT233263.1 - 338

13 54127417 54127817 Homo\_sapiens\_13\_54129305-54130960-HERVHF-5LTR - 13  
54115783 54132866 ENSG00000234787 - 400

13 54128407 54130751 Homo\_sapiens\_13\_54129305-54130960-HERVHF-pol - 13  
54115783 54132866 ENSG00000234787 - 2344

13 54130113 54130865 Homo\_sapiens\_13\_54129305-54130960-HERVHF-pro - 13  
54115783 54132866 ENSG00000234787 - 752

13 54130954 54131292 Homo\_sapiens\_13\_54129305-54130960-HERVHF-gag - 13  
54115783 54132866 ENSG00000234787 - 338

13 54127417 54127817 Homo\_sapiens\_13\_54129305-54130960-HERVHF-5LTR - 13  
54115788 54132866 NONHSAT034024.2 - 400

13 54127417 54127817 Homo\_sapiens\_13\_54129305-54130960-HERVHF-5LTR - 13  
54115788 54132891 NONHSAT034025.2 - 400

13 54128407 54130751 Homo\_sapiens\_13\_54129305-54130960-HERVHF-pol - 13  
54115788 54132866 NONHSAT034024.2 - 2344

13 54128407 54130751 Homo\_sapiens\_13\_54129305-54130960-HERVHF-pol - 13  
54115788 54132891 NONHSAT034025.2 - 2344

13 54130113 54130865 Homo\_sapiens\_13\_54129305-54130960-HERVHF-pro - 13  
54115788 54132866 NONHSAT034024.2 - 752

13 54130113 54130865 Homo\_sapiens\_13\_54129305-54130960-HERVHF-pro - 13  
54115788 54132891 NONHSAT034025.2 - 752

13 54130954 54131292 Homo\_sapiens\_13\_54129305-54130960-HERVHF-gag - 13



54115788 54132866 NONHSAT034024.2 - 338

13 54130954 54131292 Homo\_sapiens\_13\_54129305-54130960-HERVHF-gag - 13  
54115788 54132891 NONHSAT034025.2 - 338

13 54127417 54127817 Homo\_sapiens\_13\_54129305-54130960-HERVHF-5LTR - 13  
54115789 54132867 NONHSAT166813.1 - 400

13 54128407 54130751 Homo\_sapiens\_13\_54129305-54130960-HERVHF-pol - 13  
54115789 54132867 NONHSAT166813.1 - 2344

13 54130113 54130865 Homo\_sapiens\_13\_54129305-54130960-HERVHF-pro - 13  
54115789 54132867 NONHSAT166813.1 - 752

13 54130954 54131292 Homo\_sapiens\_13\_54129305-54130960-HERVHF-gag - 13  
54115789 54132867 NONHSAT166813.1 - 338

13 54127417 54127817 Homo\_sapiens\_13\_54129305-54130960-HERVHF-5LTR - 13  
54123609 54132891 NONHSAT233264.1 - 400

13 54128407 54130751 Homo\_sapiens\_13\_54129305-54130960-HERVHF-pol - 13  
54123609 54132891 NONHSAT233264.1 - 2344

13 54130113 54130865 Homo\_sapiens\_13\_54129305-54130960-HERVHF-pro - 13  
54123609 54132891 NONHSAT233264.1 - 752

13 54130954 54131292 Homo\_sapiens\_13\_54129305-54130960-HERVHF-gag - 13  
54123609 54132891 NONHSAT233264.1 - 338

13 54127417 54127817 Homo\_sapiens\_13\_54129305-54130960-HERVHF-5LTR - 13  
54124323 54132613 NONHSAT034027.2 - 400

13 54127417 54127817 Homo\_sapiens\_13\_54129305-54130960-HERVHF-5LTR - 13  
54124323 54132891 NONHSAT034028.2 - 400

13 54128407 54130751 Homo\_sapiens\_13\_54129305-54130960-HERVHF-pol - 13  
54124323 54132613 NONHSAT034027.2 - 2344

13 54128407 54130751 Homo\_sapiens\_13\_54129305-54130960-HERVHF-pol - 13  
54124323 54132891 NONHSAT034028.2 - 2344

13 54130113 54130865 Homo\_sapiens\_13\_54129305-54130960-HERVHF-pro - 13  
54124323 54132613 NONHSAT034027.2 - 752

13 54130113 54130865 Homo\_sapiens\_13\_54129305-54130960-HERVHF-pro - 13  
54124323 54132891 NONHSAT034028.2 - 752

13 54130954 54131292 Homo\_sapiens\_13\_54129305-54130960-HERVHF-gag - 13  
54124323 54132613 NONHSAT034027.2 - 338

13 54130954 54131292 Homo\_sapiens\_13\_54129305-54130960-HERVHF-gag - 13  
54124323 54132891 NONHSAT034028.2 - 338

13 54127417 54127817 Homo\_sapiens\_13\_54129305-54130960-HERVHF-5LTR - 13  
54124324 54132862 ENSG00000234787 - 400

13 54128407 54130751 Homo\_sapiens\_13\_54129305-54130960-HERVHF-pol - 13  
54124324 54132862 ENSG00000234787 - 2344

13 54130113 54130865 Homo\_sapiens\_13\_54129305-54130960-HERVHF-pro - 13  
54124324 54132862 ENSG00000234787 - 752

13 54130954 54131292 Homo\_sapiens\_13\_54129305-54130960-HERVHF-gag - 13  
54124324 54132862 ENSG00000234787 - 338

13 54127417 54127817 Homo\_sapiens\_13\_54129305-54130960-HERVHF-5LTR - 13

54124812 54132891 NONHSAT166815.1 - 400

13 54128407 54130751 Homo\_sapiens\_13\_54129305-54130960-HERVHF-pol - 13  
54124812 54132891 NONHSAT166815.1 - 2344

13 54130113 54130865 Homo\_sapiens\_13\_54129305-54130960-HERVHF-pro - 13  
54124812 54132891 NONHSAT166815.1 - 752

13 54130954 54131292 Homo\_sapiens\_13\_54129305-54130960-HERVHF-gag - 13  
54124812 54132891 NONHSAT166815.1 - 338

13 54127417 54127817 Homo\_sapiens\_13\_54129305-54130960-HERVHF-5LTR - 13  
54124813 54132851 ENSG00000234787 - 400

13 54128407 54130751 Homo\_sapiens\_13\_54129305-54130960-HERVHF-pol - 13  
54124813 54132851 ENSG00000234787 - 2344

13 54130113 54130865 Homo\_sapiens\_13\_54129305-54130960-HERVHF-pro - 13  
54124813 54132851 ENSG00000234787 - 752

13 54130954 54131292 Homo\_sapiens\_13\_54129305-54130960-HERVHF-gag - 13  
54124813 54132851 ENSG00000234787 - 338

13 54127417 54127817 Homo\_sapiens\_13\_54129305-54130960-HERVHF-5LTR - 13  
54124994 54132891 NONHSAT166816.1 - 400

13 54128407 54130751 Homo\_sapiens\_13\_54129305-54130960-HERVHF-pol - 13  
54124994 54132891 NONHSAT166816.1 - 2344

13 54130113 54130865 Homo\_sapiens\_13\_54129305-54130960-HERVHF-pro - 13  
54124994 54132891 NONHSAT166816.1 - 752

13 54130954 54131292 Homo\_sapiens\_13\_54129305-54130960-HERVHF-gag - 13  
54124994 54132891 NONHSAT166816.1 - 338

13 54127417 54127817 Homo\_sapiens\_13\_54129305-54130960-HERVHF-5LTR - 13  
54124995 54132819 ENSG00000234787 - 400

13 54128407 54130751 Homo\_sapiens\_13\_54129305-54130960-HERVHF-pol - 13  
54124995 54132819 ENSG00000234787 - 2344

13 54130113 54130865 Homo\_sapiens\_13\_54129305-54130960-HERVHF-pro - 13  
54124995 54132819 ENSG00000234787 - 752

13 54130954 54131292 Homo\_sapiens\_13\_54129305-54130960-HERVHF-gag - 13  
54124995 54132819 ENSG00000234787 - 338

13 54127417 54127817 Homo\_sapiens\_13\_54129305-54130960-HERVHF-5LTR - 13  
54126861 54132891 NONHSAT034029.2 - 400

13 54128407 54130751 Homo\_sapiens\_13\_54129305-54130960-HERVHF-pol - 13  
54126861 54132891 NONHSAT034029.2 - 2344

13 54130113 54130865 Homo\_sapiens\_13\_54129305-54130960-HERVHF-pro - 13  
54126861 54132891 NONHSAT034029.2 - 752

13 54130954 54131292 Homo\_sapiens\_13\_54129305-54130960-HERVHF-gag - 13  
54126861 54132891 NONHSAT034029.2 - 338

13 54127417 54127817 Homo\_sapiens\_13\_54129305-54130960-HERVHF-5LTR - 13  
54126862 54132866 ENSG00000234787 - 400

13 54128407 54130751 Homo\_sapiens\_13\_54129305-54130960-HERVHF-pol - 13  
54126862 54132866 ENSG00000234787 - 2344

13 54130113 54130865 Homo\_sapiens\_13\_54129305-54130960-HERVHF-pro - 13

54126862 54132866 ENSG00000234787 - 752

13 54130954 54131292 Homo\_sapiens\_13\_54129305-54130960-HERVHF-gag - 13  
54126862 54132866 ENSG00000234787 - 338

13 54127417 54133159 Homo\_sapiens\_13\_54129305-54130960-HERVHF - 13 54127361  
54142319 ENSG00000234787 - 5742

13 54127417 54127817 Homo\_sapiens\_13\_54129305-54130960-HERVHF-5LTR - 13  
54127361 54142319 ENSG00000234787 - 400

13 54128407 54130751 Homo\_sapiens\_13\_54129305-54130960-HERVHF-pol - 13  
54127361 54142319 ENSG00000234787 - 2344

13 54130113 54130865 Homo\_sapiens\_13\_54129305-54130960-HERVHF-pro - 13  
54127361 54142319 ENSG00000234787 - 752

13 54130954 54131292 Homo\_sapiens\_13\_54129305-54130960-HERVHF-gag - 13  
54127361 54142319 ENSG00000234787 - 338

13 54132759 54133159 Homo\_sapiens\_13\_54129305-54130960-HERVHF-3LTR - 13  
54127361 54142319 ENSG00000234787 - 400

13 54127417 54133159 Homo\_sapiens\_13\_54129305-54130960-HERVHF - 13 54130894  
54132891 NONHSAT233265.1 - 1997

13 54130954 54131292 Homo\_sapiens\_13\_54129305-54130960-HERVHF-gag - 13  
54130894 54132891 NONHSAT233265.1 - 338

13 66141327 66147037 Homo\_sapiens\_13\_66143157-66144503-HERVHF - 13 66086287  
66205334 NONHSAG067586.1 - 5710

13 66141327 66141765 Homo\_sapiens\_13\_66143157-66144503-HERVHF-5LTR - 13  
66086287 66205334 NONHSAG067586.1 - 438

13 66141327 66147037 Homo\_sapiens\_13\_66143157-66144503-HERVHF - 13 66086287  
66205334 NONHSAT166892.1 - 5710

13 66141327 66141765 Homo\_sapiens\_13\_66143157-66144503-HERVHF-5LTR - 13  
66086287 66205334 NONHSAT166892.1 - 438

13 66142250 66144110 Homo\_sapiens\_13\_66143157-66144503-HERVHF-pol - 13  
66086287 66205334 NONHSAG067586.1 - 1860

13 66142250 66144110 Homo\_sapiens\_13\_66143157-66144503-HERVHF-pol - 13  
66086287 66205334 NONHSAT166892.1 - 1860

13 66144597 66144917 Homo\_sapiens\_13\_66143157-66144503-HERVHF-gag - 13  
66086287 66205334 NONHSAG067586.1 - 320

13 66144597 66144917 Homo\_sapiens\_13\_66143157-66144503-HERVHF-gag - 13  
66086287 66205334 NONHSAT166892.1 - 320

13 66146605 66147037 Homo\_sapiens\_13\_66143157-66144503-HERVHF-3LTR - 13  
66086287 66205334 NONHSAG067586.1 - 432

13 66146605 66147037 Homo\_sapiens\_13\_66143157-66144503-HERVHF-3LTR - 13  
66086287 66205334 NONHSAT166892.1 - 432

13 66142250 66144110 Homo\_sapiens\_13\_66143157-66144503-HERVHF-pol - 13  
66141367 66232074 NONHSAG013698.2 - 1860

13 66142250 66144110 Homo\_sapiens\_13\_66143157-66144503-HERVHF-pol - 13  
66141367 66232074 NONHSAT034205.2 - 1860

13 66144597 66144917 Homo\_sapiens\_13\_66143157-66144503-HERVHF-gag - 13

|    |                                                                 |   |      |  |
|----|-----------------------------------------------------------------|---|------|--|
|    | 66141367 66232074 NONHSAG013698.2                               | - | 320  |  |
| 13 | 66144597 66144917 Homo_sapiens_13_66143157-66144503-HERVHF-gag  | - | 13   |  |
|    | 66141367 66232074 NONHSAT034205.2                               | - | 320  |  |
| 13 | 66146605 66147037 Homo_sapiens_13_66143157-66144503-HERVHF-3LTR | - | 13   |  |
|    | 66141367 66232074 NONHSAG013698.2                               | - | 432  |  |
| 13 | 66146605 66147037 Homo_sapiens_13_66143157-66144503-HERVHF-3LTR | - | 13   |  |
|    | 66141367 66232074 NONHSAT034205.2                               | - | 432  |  |
| 13 | 79276611 79277441 Homo_sapiens_13_79276654-79278001-HERVHF-pro  | + | 13   |  |
|    | 79276453 79296131 NONHSAG067153.1                               | + | 830  |  |
| 13 | 79276611 79277441 Homo_sapiens_13_79276654-79278001-HERVHF-pro  | + | 13   |  |
|    | 79276453 79296131 NONHSAT165987.1                               | + | 830  |  |
| 13 | 79276860 79278376 Homo_sapiens_13_79276654-79278001-HERVHF-pol  | + | 13   |  |
|    | 79276453 79296131 NONHSAG067153.1                               | + | 1516 |  |
| 13 | 79276860 79278376 Homo_sapiens_13_79276654-79278001-HERVHF-pol  | + | 13   |  |
|    | 79276453 79296131 NONHSAT165987.1                               | + | 1516 |  |
| 13 | 79279414 79279830 Homo_sapiens_13_79276654-79278001-HERVHF-3LTR | + | 13   |  |
|    | 79276453 79296131 NONHSAG067153.1                               | + | 416  |  |
| 13 | 79279414 79279830 Homo_sapiens_13_79276654-79278001-HERVHF-3LTR | + | 13   |  |
|    | 79276453 79296131 NONHSAT165987.1                               | + | 416  |  |
| 14 | 38193319 38194104 Homo_sapiens_14_38193317-38194783-HERVHF-pro  | + | 14   |  |
|    | 38190982 38203533 NONHSAG014760.3                               | + | 785  |  |
| 14 | 38193319 38194104 Homo_sapiens_14_38193317-38194783-HERVHF-pro  | + | 14   |  |
|    | 38190982 38202923 NONHSAT036484.2                               | + | 785  |  |
| 14 | 38193319 38194104 Homo_sapiens_14_38193317-38194783-HERVHF-pro  | + | 14   |  |
|    | 38190982 38203533 NONHSAT233631.1                               | + | 785  |  |
| 14 | 38193319 38194104 Homo_sapiens_14_38193317-38194783-HERVHF-pro  | + | 14   |  |
|    | 38190982 38203533 NONHSAT233632.1                               | + | 785  |  |
| 14 | 38193562 38195486 Homo_sapiens_14_38193317-38194783-HERVHF-pol  | + | 14   |  |
|    | 38190982 38203533 NONHSAG014760.3                               | + | 1924 |  |
| 14 | 38193562 38195486 Homo_sapiens_14_38193317-38194783-HERVHF-pol  | + | 14   |  |
|    | 38190982 38202923 NONHSAT036484.2                               | + | 1924 |  |
| 14 | 38193562 38195486 Homo_sapiens_14_38193317-38194783-HERVHF-pol  | + | 14   |  |
|    | 38190982 38203533 NONHSAT233631.1                               | + | 1924 |  |
| 14 | 38193562 38195486 Homo_sapiens_14_38193317-38194783-HERVHF-pol  | + | 14   |  |
|    | 38190982 38203533 NONHSAT233632.1                               | + | 1924 |  |
| 14 | 38196077 38196529 Homo_sapiens_14_38193317-38194783-HERVHF-3LTR | + | 14   |  |
|    | 38190982 38203533 NONHSAG014760.3                               | + | 452  |  |
| 14 | 38196077 38196529 Homo_sapiens_14_38193317-38194783-HERVHF-3LTR | + | 14   |  |
|    | 38190982 38202923 NONHSAT036484.2                               | + | 452  |  |
| 14 | 38196077 38196529 Homo_sapiens_14_38193317-38194783-HERVHF-3LTR | + | 14   |  |
|    | 38190982 38203533 NONHSAT233631.1                               | + | 452  |  |
| 14 | 38196077 38196529 Homo_sapiens_14_38193317-38194783-HERVHF-3LTR | + | 14   |  |
|    | 38190982 38203533 NONHSAT233632.1                               | + | 452  |  |
| 14 | 38193319 38194104 Homo_sapiens_14_38193317-38194783-HERVHF-pro  | + | 14   |  |

38190983 38202923 ENSG00000258649 + 785  
 14 38193562 38195486 Homo\_sapiens\_14\_38193317-38194783-HERVHF-pol + 14  
 38190983 38202923 ENSG00000258649 + 1924  
 14 38196077 38196529 Homo\_sapiens\_14\_38193317-38194783-HERVHF-3LTR + 14  
 38190983 38202923 ENSG00000258649 + 452  
 14 38193319 38194104 Homo\_sapiens\_14\_38193317-38194783-HERVHF-pro + 14  
 38193207 38203526 NONHSAT036485.2 + 785  
 14 38193562 38195486 Homo\_sapiens\_14\_38193317-38194783-HERVHF-pol + 14  
 38193207 38203526 NONHSAT036485.2 + 1924  
 14 38196077 38196529 Homo\_sapiens\_14\_38193317-38194783-HERVHF-3LTR + 14  
 38193207 38203526 NONHSAT036485.2 + 452  
 14 41521426 41521883 Homo\_sapiens\_14\_41518469-41520184-HERVHF-3LTR + 14  
 41520522 41526746 NONHSAG014802.2 + 457  
 14 41521426 41521883 Homo\_sapiens\_14\_41518469-41520184-HERVHF-3LTR + 14  
 41520522 41526746 NONHSAT036571.2 + 457  
 14 48255191 48263146 Homo\_sapiens\_14\_48256895-48258584-HERVHF - 14 48227412  
 48266912 NONHSAG014863.3 - 7955  
 14 48255191 48255959 Homo\_sapiens\_14\_48256895-48258584-HERVHF-5LTR - 14  
 48227412 48266912 NONHSAG014863.3 - 768  
 14 48255191 48255959 Homo\_sapiens\_14\_48256895-48258584-HERVHF-5LTR - 14  
 48227412 48260643 NONHSAT234204.1 - 768  
 14 48255191 48255959 Homo\_sapiens\_14\_48256895-48258584-HERVHF-5LTR - 14  
 48227412 48260643 NONHSAT234205.1 - 768  
 14 48256057 48258390 Homo\_sapiens\_14\_48256895-48258584-HERVHF-pol - 14  
 48227412 48266912 NONHSAG014863.3 - 2333  
 14 48256057 48258390 Homo\_sapiens\_14\_48256895-48258584-HERVHF-pol - 14  
 48227412 48260643 NONHSAT234204.1 - 2333  
 14 48256057 48258390 Homo\_sapiens\_14\_48256895-48258584-HERVHF-pol - 14  
 48227412 48260643 NONHSAT234205.1 - 2333  
 14 48257788 48258639 Homo\_sapiens\_14\_48256895-48258584-HERVHF-pro - 14  
 48227412 48266912 NONHSAG014863.3 - 851  
 14 48257788 48258639 Homo\_sapiens\_14\_48256895-48258584-HERVHF-pro - 14  
 48227412 48260643 NONHSAT234204.1 - 851  
 14 48257788 48258639 Homo\_sapiens\_14\_48256895-48258584-HERVHF-pro - 14  
 48227412 48260643 NONHSAT234205.1 - 851  
 14 48262389 48263146 Homo\_sapiens\_14\_48256895-48258584-HERVHF-3LTR - 14  
 48227412 48266912 NONHSAG014863.3 - 757  
 14 48255191 48263146 Homo\_sapiens\_14\_48256895-48258584-HERVHF - 14 48233461  
 48266912 NONHSAT036697.2 - 7955  
 14 48255191 48255959 Homo\_sapiens\_14\_48256895-48258584-HERVHF-5LTR - 14  
 48233461 48266912 NONHSAT036697.2 - 768  
 14 48256057 48258390 Homo\_sapiens\_14\_48256895-48258584-HERVHF-pol - 14  
 48233461 48266912 NONHSAT036697.2 - 2333  
 14 48257788 48258639 Homo\_sapiens\_14\_48256895-48258584-HERVHF-pro - 14

48233461 48266912 NONHSAT036697.2 - 851

14 48262389 48263146 Homo\_sapiens\_14\_48256895-48258584-HERVHF-3LTR - 14  
48233461 48266912 NONHSAT036697.2 - 757

14 48255191 48263146 Homo\_sapiens\_14\_48256895-48258584-HERVHF - 14 48255676  
48260643 NONHSAT234206.1 - 4967

14 48256057 48258390 Homo\_sapiens\_14\_48256895-48258584-HERVHF-pol - 14  
48255676 48260643 NONHSAT234206.1 - 2333

14 48257788 48258639 Homo\_sapiens\_14\_48256895-48258584-HERVHF-pro - 14  
48255676 48260643 NONHSAT234206.1 - 851

14 48262389 48263146 Homo\_sapiens\_14\_48256895-48258584-HERVHF-3LTR - 14  
48262021 48265609 ENSG00000287492 - 757

15 74354141 74359786 Homo\_sapiens\_15\_74355867-74357936-HERVHF + 15 74350767  
74364620 NONHSAG017411.2 + 5645

15 74354141 74354539 Homo\_sapiens\_15\_74355867-74357936-HERVHF-5LTR + 15  
74350767 74364620 NONHSAG017411.2 + 398

15 74354141 74359786 Homo\_sapiens\_15\_74355867-74357936-HERVHF + 15 74350767  
74361903 NONHSAT047227.2 + 5645

15 74354141 74354539 Homo\_sapiens\_15\_74355867-74357936-HERVHF-5LTR + 15  
74350767 74361903 NONHSAT047227.2 + 398

15 74355965 74356405 Homo\_sapiens\_15\_74355867-74357936-HERVHF-gag + 15  
74350767 74364620 NONHSAG017411.2 + 440

15 74355965 74356405 Homo\_sapiens\_15\_74355867-74357936-HERVHF-gag + 15  
74350767 74361903 NONHSAT047227.2 + 440

15 74356488 74357237 Homo\_sapiens\_15\_74355867-74357936-HERVHF-pro + 15  
74350767 74364620 NONHSAG017411.2 + 749

15 74356488 74357237 Homo\_sapiens\_15\_74355867-74357936-HERVHF-pro + 15  
74350767 74361903 NONHSAT047227.2 + 749

15 74356599 74358842 Homo\_sapiens\_15\_74355867-74357936-HERVHF-pol + 15  
74350767 74364620 NONHSAG017411.2 + 2243

15 74356599 74358842 Homo\_sapiens\_15\_74355867-74357936-HERVHF-pol + 15  
74350767 74361903 NONHSAT047227.2 + 2243

15 74359383 74359786 Homo\_sapiens\_15\_74355867-74357936-HERVHF-3LTR + 15  
74350767 74364620 NONHSAG017411.2 + 403

15 74359383 74359786 Homo\_sapiens\_15\_74355867-74357936-HERVHF-3LTR + 15  
74350767 74361903 NONHSAT047227.2 + 403

15 74354141 74359786 Homo\_sapiens\_15\_74355867-74357936-HERVHF + 15 74350768  
74361903 ENSG00000260266 + 5645

15 74354141 74354539 Homo\_sapiens\_15\_74355867-74357936-HERVHF-5LTR + 15  
74350768 74361903 ENSG00000260266 + 398

15 74355965 74356405 Homo\_sapiens\_15\_74355867-74357936-HERVHF-gag + 15  
74350768 74361903 ENSG00000260266 + 440

15 74356488 74357237 Homo\_sapiens\_15\_74355867-74357936-HERVHF-pro + 15  
74350768 74361903 ENSG00000260266 + 749

15 74356599 74358842 Homo\_sapiens\_15\_74355867-74357936-HERVHF-pol + 15

|    |                                                                 |        |          |
|----|-----------------------------------------------------------------|--------|----------|
|    | 74350768 74361903 ENSG00000260266 +                             | 2243   |          |
| 15 | 74359383 74359786 Homo_sapiens_15_74355867-74357936-HERVHF-3LTR | + 15   |          |
|    | 74350768 74361903 ENSG00000260266 +                             | 403    |          |
| 15 | 74355965 74356405 Homo_sapiens_15_74355867-74357936-HERVHF-gag  | + 15   |          |
|    | 74354455 74364620 NONHSAT047228.2                               | + 440  |          |
| 15 | 74356488 74357237 Homo_sapiens_15_74355867-74357936-HERVHF-pro  | + 15   |          |
|    | 74354455 74364620 NONHSAT047228.2                               | + 749  |          |
| 15 | 74356599 74358842 Homo_sapiens_15_74355867-74357936-HERVHF-pol  | + 15   |          |
|    | 74354455 74364620 NONHSAT047228.2                               | + 2243 |          |
| 15 | 74359383 74359786 Homo_sapiens_15_74355867-74357936-HERVHF-3LTR | + 15   |          |
|    | 74354455 74364620 NONHSAT047228.2                               | + 403  |          |
| 15 | 74355965 74356405 Homo_sapiens_15_74355867-74357936-HERVHF-gag  | + 15   |          |
|    | 74354456 74364620 ENSG00000260266 +                             | 440    |          |
| 15 | 74356488 74357237 Homo_sapiens_15_74355867-74357936-HERVHF-pro  | + 15   |          |
|    | 74354456 74364620 ENSG00000260266 +                             | 749    |          |
| 15 | 74356599 74358842 Homo_sapiens_15_74355867-74357936-HERVHF-pol  | + 15   |          |
|    | 74354456 74364620 ENSG00000260266 +                             | 2243   |          |
| 15 | 74359383 74359786 Homo_sapiens_15_74355867-74357936-HERVHF-3LTR | + 15   |          |
|    | 74354456 74364620 ENSG00000260266 +                             | 403    |          |
| 15 | 87831107 87837024 Homo_sapiens_15_87833731-87835137-HERVHF      | + 15   | 87835202 |
|    | 87836988 NONHSAG017784.2                                        | + 1786 |          |
| 15 | 87831107 87837024 Homo_sapiens_15_87833731-87835137-HERVHF      | + 15   | 87835202 |
|    | 87836988 NONHSAT048152.2                                        | + 1786 |          |
| 15 | 87831107 87837024 Homo_sapiens_15_87833731-87835137-HERVHF      | + 15   | 87835202 |
|    | 87836151 NONHSAT171143.1+                                       | 949    |          |
| 16 | 60078536 60084582 Homo_sapiens_16_60081354-60082700-HERVHF      | + 16   | 60066531 |
|    | 60084753 NONHSAG071739.1                                        | + 6046 |          |
| 16 | 60078536 60078989 Homo_sapiens_16_60081354-60082700-HERVHF-5LTR | + 16   |          |
|    | 60066531 60084753 NONHSAG071739.1                               | + 453  |          |
| 16 | 60078536 60084582 Homo_sapiens_16_60081354-60082700-HERVHF      | + 16   | 60066531 |
|    | 60084753 NONHSAT173129.1                                        | + 6046 |          |
| 16 | 60078536 60078989 Homo_sapiens_16_60081354-60082700-HERVHF-5LTR | + 16   |          |
|    | 60066531 60084753 NONHSAT173129.1                               | + 453  |          |
| 16 | 60078536 60084582 Homo_sapiens_16_60081354-60082700-HERVHF      | + 16   | 60066531 |
|    | 60084753 NONHSAT173130.1                                        | + 6046 |          |
| 16 | 60078536 60078989 Homo_sapiens_16_60081354-60082700-HERVHF-5LTR | + 16   |          |
|    | 60066531 60084753 NONHSAT173130.1                               | + 453  |          |
| 16 | 60080893 60081216 Homo_sapiens_16_60081354-60082700-HERVHF-gag  | + 16   |          |
|    | 60066531 60084753 NONHSAG071739.1                               | + 323  |          |
| 16 | 60080893 60081216 Homo_sapiens_16_60081354-60082700-HERVHF-gag  | + 16   |          |
|    | 60066531 60084753 NONHSAT173129.1                               | + 323  |          |
| 16 | 60080893 60081216 Homo_sapiens_16_60081354-60082700-HERVHF-gag  | + 16   |          |
|    | 60066531 60084753 NONHSAT173130.1                               | + 323  |          |
| 16 | 60081323 60082141 Homo_sapiens_16_60081354-60082700-HERVHF-pro  | + 16   |          |

|    |                                                                 |   |      |          |
|----|-----------------------------------------------------------------|---|------|----------|
|    | 60066531 60084753 NONHSAG071739.1                               | + | 818  |          |
| 16 | 60081323 60082141 Homo_sapiens_16_60081354-60082700-HERVHF-pro  | + | 16   |          |
|    | 60066531 60084753 NONHSAT173129.1                               | + | 818  |          |
| 16 | 60081323 60082141 Homo_sapiens_16_60081354-60082700-HERVHF-pro  | + | 16   |          |
|    | 60066531 60084753 NONHSAT173130.1                               | + | 818  |          |
| 16 | 60081599 60083447 Homo_sapiens_16_60081354-60082700-HERVHF-pol  | + | 16   |          |
|    | 60066531 60084753 NONHSAG071739.1                               | + | 1848 |          |
| 16 | 60081599 60083447 Homo_sapiens_16_60081354-60082700-HERVHF-pol  | + | 16   |          |
|    | 60066531 60084753 NONHSAT173129.1                               | + | 1848 |          |
| 16 | 60081599 60083447 Homo_sapiens_16_60081354-60082700-HERVHF-pol  | + | 16   |          |
|    | 60066531 60084753 NONHSAT173130.1                               | + | 1848 |          |
| 16 | 60084128 60084582 Homo_sapiens_16_60081354-60082700-HERVHF-3LTR | + | 16   |          |
|    | 60066531 60084753 NONHSAG071739.1                               | + | 454  |          |
| 16 | 60084128 60084582 Homo_sapiens_16_60081354-60082700-HERVHF-3LTR | + | 16   |          |
|    | 60066531 60084753 NONHSAT173129.1                               | + | 454  |          |
| 16 | 60084128 60084582 Homo_sapiens_16_60081354-60082700-HERVHF-3LTR | + | 16   |          |
|    | 60066531 60084753 NONHSAT173130.1                               | + | 454  |          |
| 16 | 60078536 60078989 Homo_sapiens_16_60081354-60082700-HERVHF-5LTR | + | 16   |          |
|    | 60068880 60083061 NONHSAT173131.1                               | + | 453  |          |
| 16 | 60080893 60081216 Homo_sapiens_16_60081354-60082700-HERVHF-gag  | + | 16   |          |
|    | 60068880 60083061 NONHSAT173131.1                               | + | 323  |          |
| 16 | 60081323 60082141 Homo_sapiens_16_60081354-60082700-HERVHF-pro  | + | 16   |          |
|    | 60068880 60083061 NONHSAT173131.1                               | + | 818  |          |
| 16 | 65229803 65235350 Homo_sapiens_16_65231504-65233039-HERVHF      | - | 16   | 65190972 |
|    | 65276355 NONHSAG019666.2                                        | - | 5547 |          |
| 16 | 65229803 65230258 Homo_sapiens_16_65231504-65233039-HERVHF-5LTR | - | 16   |          |
|    | 65190972 65276355 NONHSAG019666.2                               | - | 455  |          |
| 16 | 65229803 65230258 Homo_sapiens_16_65231504-65233039-HERVHF-5LTR | - | 16   |          |
|    | 65190972 65234914 NONHSAT142973.2                               | - | 455  |          |
| 16 | 65231100 65232797 Homo_sapiens_16_65231504-65233039-HERVHF-pol  | - | 16   |          |
|    | 65190972 65276355 NONHSAG019666.2                               | - | 1697 |          |
| 16 | 65231100 65232797 Homo_sapiens_16_65231504-65233039-HERVHF-pol  | - | 16   |          |
|    | 65190972 65234914 NONHSAT142973.2                               | - | 1697 |          |
| 16 | 65232255 65233088 Homo_sapiens_16_65231504-65233039-HERVHF-pro  | - | 16   |          |
|    | 65190972 65276355 NONHSAG019666.2                               | - | 833  |          |
| 16 | 65232255 65233088 Homo_sapiens_16_65231504-65233039-HERVHF-pro  | - | 16   |          |
|    | 65190972 65234914 NONHSAT142973.2                               | - | 833  |          |
| 16 | 65233092 65233421 Homo_sapiens_16_65231504-65233039-HERVHF-gag  | - | 16   |          |
|    | 65190972 65276355 NONHSAG019666.2                               | - | 329  |          |
| 16 | 65233092 65233421 Homo_sapiens_16_65231504-65233039-HERVHF-gag  | - | 16   |          |
|    | 65190972 65234914 NONHSAT142973.2                               | - | 329  |          |
| 16 | 65234898 65235350 Homo_sapiens_16_65231504-65233039-HERVHF-3LTR | - | 16   |          |
|    | 65190972 65276355 NONHSAG019666.2                               | - | 452  |          |
| 16 | 65229803 65230258 Homo_sapiens_16_65231504-65233039-HERVHF-5LTR | - | 16   |          |



65190973 65234914 ENSG00000260834 - 455  
 16 65231100 65232797 Homo\_sapiens\_16\_65231504-65233039-HERVHF-pol - 16  
 65190973 65234914 ENSG00000260834 - 1697  
 16 65232255 65233088 Homo\_sapiens\_16\_65231504-65233039-HERVHF-pro - 16  
 65190973 65234914 ENSG00000260834 - 833  
 16 65233092 65233421 Homo\_sapiens\_16\_65231504-65233039-HERVHF-gag - 16  
 65190973 65234914 ENSG00000260834 - 329  
 16 65229803 65235350 Homo\_sapiens\_16\_65231504-65233039-HERVHF - 16 65227786  
 65276355 NONHSAT142974.2 - 5547  
 16 65229803 65230258 Homo\_sapiens\_16\_65231504-65233039-HERVHF-5LTR - 16  
 65227786 65276355 NONHSAT142974.2 - 455  
 16 65231100 65232797 Homo\_sapiens\_16\_65231504-65233039-HERVHF-pol - 16  
 65227786 65276355 NONHSAT142974.2 - 1697  
 16 65232255 65233088 Homo\_sapiens\_16\_65231504-65233039-HERVHF-pro - 16  
 65227786 65276355 NONHSAT142974.2 - 833  
 16 65233092 65233421 Homo\_sapiens\_16\_65231504-65233039-HERVHF-gag - 16  
 65227786 65276355 NONHSAT142974.2 - 329  
 16 65234898 65235350 Homo\_sapiens\_16\_65231504-65233039-HERVHF-3LTR - 16  
 65227786 65276355 NONHSAT142974.2 - 452  
 16 65229803 65230258 Homo\_sapiens\_16\_65231504-65233039-HERVHF-5LTR - 16  
 65227895 65234904 ENSG00000260834 - 455  
 16 65231100 65232797 Homo\_sapiens\_16\_65231504-65233039-HERVHF-pol - 16  
 65227895 65234904 ENSG00000260834 - 1697  
 16 65232255 65233088 Homo\_sapiens\_16\_65231504-65233039-HERVHF-pro - 16  
 65227895 65234904 ENSG00000260834 - 833  
 16 65233092 65233421 Homo\_sapiens\_16\_65231504-65233039-HERVHF-gag - 16  
 65227895 65234904 ENSG00000260834 - 329  
 18 28693028 28693465 Homo\_sapiens\_18\_28694974-28696314-HERVHF-5LTR - 18  
 28688304 28696511 NONHSAG075074.1 - 437  
 18 28693028 28693465 Homo\_sapiens\_18\_28694974-28696314-HERVHF-5LTR - 18  
 28688304 28696511 NONHSAT178313.1 - 437  
 18 28694048 28696068 Homo\_sapiens\_18\_28694974-28696314-HERVHF-pol - 18  
 28688304 28696511 NONHSAG075074.1 - 2020  
 18 28694048 28696068 Homo\_sapiens\_18\_28694974-28696314-HERVHF-pol - 18  
 28688304 28696511 NONHSAT178313.1 - 2020  
 18 56417745 56418068 Homo\_sapiens\_18\_56418118-56419466-HERVHF-gag + 18  
 56415837 56425475 NONHSAG074828.1 + 323  
 18 56417745 56418068 Homo\_sapiens\_18\_56418118-56419466-HERVHF-gag + 18  
 56415837 56425475 NONHSAT177849.1 + 323  
 18 56418362 56420489 Homo\_sapiens\_18\_56418118-56419466-HERVHF-pol + 18  
 56415837 56425475 NONHSAG074828.1 + 2127  
 18 56418362 56420489 Homo\_sapiens\_18\_56418118-56419466-HERVHF-pol + 18  
 56415837 56425475 NONHSAT177849.1 + 2127  
 18 56420893 56421344 Homo\_sapiens\_18\_56418118-56419466-HERVHF-3LTR + 18

|    |                                                                 |   |      |
|----|-----------------------------------------------------------------|---|------|
|    | 56415837 56425475 NONHSAG074828.1                               | + | 451  |
| 18 | 56420893 56421344 Homo_sapiens_18_56418118-56419466-HERVHF-3LTR | + | 18   |
|    | 56415837 56425475 NONHSAT177849.1                               | + | 451  |
| 18 | 57064647 57065099 Homo_sapiens_18_57068491-57069834-HERVHF-5LTR | - | 18   |
|    | 57054558 57072119 ENSG00000258609                               | - | 452  |
| 18 | 57064647 57065099 Homo_sapiens_18_57068491-57069834-HERVHF-5LTR | - | 18   |
|    | 57054558 57072119 NONHSAG023930.2                               | - | 452  |
| 18 | 57064647 57065099 Homo_sapiens_18_57068491-57069834-HERVHF-5LTR | - | 18   |
|    | 57054558 57072119 NONHSAT059436.2                               | - | 452  |
| 18 | 57065267 57065866 Homo_sapiens_18_57068491-57069834-HERVHF-env  | - | 18   |
|    | 57054558 57072119 ENSG00000258609                               | - | 599  |
| 18 | 57065267 57065866 Homo_sapiens_18_57068491-57069834-HERVHF-env  | - | 18   |
|    | 57054558 57072119 NONHSAG023930.2                               | - | 599  |
| 18 | 57065267 57065866 Homo_sapiens_18_57068491-57069834-HERVHF-env  | - | 18   |
|    | 57054558 57072119 NONHSAT059436.2                               | - | 599  |
| 18 | 57067308 57069458 Homo_sapiens_18_57068491-57069834-HERVHF-pol  | - | 18   |
|    | 57054558 57072119 ENSG00000258609                               | - | 2150 |
| 18 | 57067308 57069458 Homo_sapiens_18_57068491-57069834-HERVHF-pol  | - | 18   |
|    | 57054558 57072119 NONHSAG023930.2                               | - | 2150 |
| 18 | 57067308 57069458 Homo_sapiens_18_57068491-57069834-HERVHF-pol  | - | 18   |
|    | 57054558 57072119 NONHSAT059436.2                               | - | 2150 |
| 18 | 57069033 57069632 Homo_sapiens_18_57068491-57069834-HERVHF-pro  | - | 18   |
|    | 57054558 57072119 ENSG00000258609                               | - | 599  |
| 18 | 57069033 57069632 Homo_sapiens_18_57068491-57069834-HERVHF-pro  | - | 18   |
|    | 57054558 57072119 NONHSAG023930.2                               | - | 599  |
| 18 | 57069033 57069632 Homo_sapiens_18_57068491-57069834-HERVHF-pro  | - | 18   |
|    | 57054558 57072119 NONHSAT059436.2                               | - | 599  |
| 18 | 57069916 57070296 Homo_sapiens_18_57068491-57069834-HERVHF-gag  | - | 18   |
|    | 57054558 57072119 ENSG00000258609                               | - | 380  |
| 18 | 57069916 57070296 Homo_sapiens_18_57068491-57069834-HERVHF-gag  | - | 18   |
|    | 57054558 57072119 NONHSAG023930.2                               | - | 380  |
| 18 | 57069916 57070296 Homo_sapiens_18_57068491-57069834-HERVHF-gag  | - | 18   |
|    | 57054558 57072119 NONHSAT059436.2                               | - | 380  |
| 18 | 57064647 57065099 Homo_sapiens_18_57068491-57069834-HERVHF-5LTR | - | 18   |
|    | 57054591 57072059 ENSG00000258609                               | - | 452  |
| 18 | 57064647 57065099 Homo_sapiens_18_57068491-57069834-HERVHF-5LTR | - | 18   |
|    | 57054591 57072059 ENSG00000258609                               | - | 452  |
| 18 | 57065267 57065866 Homo_sapiens_18_57068491-57069834-HERVHF-env  | - | 18   |
|    | 57054591 57072059 ENSG00000258609                               | - | 599  |
| 18 | 57065267 57065866 Homo_sapiens_18_57068491-57069834-HERVHF-env  | - | 18   |
|    | 57054591 57072059 ENSG00000258609                               | - | 599  |
| 18 | 57067308 57069458 Homo_sapiens_18_57068491-57069834-HERVHF-pol  | - | 18   |
|    | 57054591 57072059 ENSG00000258609                               | - | 2150 |
| 18 | 57067308 57069458 Homo_sapiens_18_57068491-57069834-HERVHF-pol  | - | 18   |

57054591 57072059 ENSG00000258609 - 2150

18 57069033 57069632 Homo\_sapiens\_18\_57068491-57069834-HERVHF-pro - 18  
57054591 57072059 ENSG00000258609 - 599

18 57069033 57069632 Homo\_sapiens\_18\_57068491-57069834-HERVHF-pro - 18  
57054591 57072059 ENSG00000258609 - 599

18 57069916 57070296 Homo\_sapiens\_18\_57068491-57069834-HERVHF-gag - 18  
57054591 57072059 ENSG00000258609 - 380

18 57069916 57070296 Homo\_sapiens\_18\_57068491-57069834-HERVHF-gag - 18  
57054591 57072059 ENSG00000258609 - 380

18 57064647 57065099 Homo\_sapiens\_18\_57068491-57069834-HERVHF-5LTR - 18  
57057888 57070003 ENSG00000258609 - 452

18 57064647 57065099 Homo\_sapiens\_18\_57068491-57069834-HERVHF-5LTR - 18  
57057888 57070003 ENSG00000258609 - 452

18 57064647 57065099 Homo\_sapiens\_18\_57068491-57069834-HERVHF-5LTR - 18  
57057888 57072050 ENSG00000258609 - 452

18 57064647 57065099 Homo\_sapiens\_18\_57068491-57069834-HERVHF-5LTR - 18  
57057888 57070003 ENSG00000258609 - 452

18 57065267 57065866 Homo\_sapiens\_18\_57068491-57069834-HERVHF-env - 18  
57057888 57070003 ENSG00000258609 - 599

18 57065267 57065866 Homo\_sapiens\_18\_57068491-57069834-HERVHF-env - 18  
57057888 57070003 ENSG00000258609 - 599

18 57065267 57065866 Homo\_sapiens\_18\_57068491-57069834-HERVHF-env - 18  
57057888 57072050 ENSG00000258609 - 599

18 57065267 57065866 Homo\_sapiens\_18\_57068491-57069834-HERVHF-env - 18  
57057888 57070003 ENSG00000258609 - 599

18 57067308 57069458 Homo\_sapiens\_18\_57068491-57069834-HERVHF-pol - 18  
57057888 57070003 ENSG00000258609 - 2150

18 57067308 57069458 Homo\_sapiens\_18\_57068491-57069834-HERVHF-pol - 18  
57057888 57070003 ENSG00000258609 - 2150

18 57067308 57069458 Homo\_sapiens\_18\_57068491-57069834-HERVHF-pol - 18  
57057888 57072050 ENSG00000258609 - 2150

18 57067308 57069458 Homo\_sapiens\_18\_57068491-57069834-HERVHF-pol - 18  
57057888 57070003 ENSG00000258609 - 2150

18 57069033 57069632 Homo\_sapiens\_18\_57068491-57069834-HERVHF-pro - 18  
57057888 57070003 ENSG00000258609 - 599

18 57069033 57069632 Homo\_sapiens\_18\_57068491-57069834-HERVHF-pro - 18  
57057888 57070003 ENSG00000258609 - 599

18 57069033 57069632 Homo\_sapiens\_18\_57068491-57069834-HERVHF-pro - 18  
57057888 57072050 ENSG00000258609 - 599

18 57069033 57069632 Homo\_sapiens\_18\_57068491-57069834-HERVHF-pro - 18  
57057888 57070003 ENSG00000258609 - 599

18 57069916 57070296 Homo\_sapiens\_18\_57068491-57069834-HERVHF-gag - 18  
57057888 57072050 ENSG00000258609 - 380

18 57064647 57065099 Homo\_sapiens\_18\_57068491-57069834-HERVHF-5LTR - 18

57063555 57072119 ENSG00000258609 - 452

18 57065267 57065866 Homo\_sapiens\_18\_57068491-57069834-HERVHF-env - 18  
57063555 57072119 ENSG00000258609 - 599

18 57067308 57069458 Homo\_sapiens\_18\_57068491-57069834-HERVHF-pol - 18  
57063555 57072119 ENSG00000258609 - 2150

18 57069033 57069632 Homo\_sapiens\_18\_57068491-57069834-HERVHF-pro - 18  
57063555 57072119 ENSG00000258609 - 599

18 57069916 57070296 Homo\_sapiens\_18\_57068491-57069834-HERVHF-gag - 18  
57063555 57072119 ENSG00000258609 - 380

18 73327171 73327950 Homo\_sapiens\_18\_73327166-73328509-HERVHF-pro + 18  
73324940 73354705 NONHSAG024146.2 + 779

18 73327171 73327950 Homo\_sapiens\_18\_73327166-73328509-HERVHF-pro + 18  
73324940 73349889 NONHSAT059835.2 + 779

18 73327408 73329488 Homo\_sapiens\_18\_73327166-73328509-HERVHF-pol + 18  
73324940 73354705 NONHSAG024146.2 + 2080

18 73327408 73329488 Homo\_sapiens\_18\_73327166-73328509-HERVHF-pol + 18  
73324940 73349889 NONHSAT059835.2 + 2080

18 73329931 73330369 Homo\_sapiens\_18\_73327166-73328509-HERVHF-3LTR + 18  
73324940 73354705 NONHSAG024146.2 + 438

18 73329931 73330369 Homo\_sapiens\_18\_73327166-73328509-HERVHF-3LTR + 18  
73324940 73349889 NONHSAT059835.2 + 438

18 73327171 73327950 Homo\_sapiens\_18\_73327166-73328509-HERVHF-pro + 18  
73324941 73349879 ENSG00000261780 + 779

18 73327171 73327950 Homo\_sapiens\_18\_73327166-73328509-HERVHF-pro + 18  
73324941 73349877 ENSG00000261780 + 779

18 73327171 73327950 Homo\_sapiens\_18\_73327166-73328509-HERVHF-pro + 18  
73324941 73349878 ENSG00000261780 + 779

18 73327171 73327950 Homo\_sapiens\_18\_73327166-73328509-HERVHF-pro + 18  
73324941 73349879 NONHSAT177989.1 + 779

18 73327408 73329488 Homo\_sapiens\_18\_73327166-73328509-HERVHF-pol + 18  
73324941 73349879 ENSG00000261780 + 2080

18 73327408 73329488 Homo\_sapiens\_18\_73327166-73328509-HERVHF-pol + 18  
73324941 73349877 ENSG00000261780 + 2080

18 73327408 73329488 Homo\_sapiens\_18\_73327166-73328509-HERVHF-pol + 18  
73324941 73349878 ENSG00000261780 + 2080

18 73327408 73329488 Homo\_sapiens\_18\_73327166-73328509-HERVHF-pol + 18  
73324941 73349879 NONHSAT177989.1 + 2080

18 73329931 73330369 Homo\_sapiens\_18\_73327166-73328509-HERVHF-3LTR + 18  
73324941 73349879 ENSG00000261780 + 438

18 73329931 73330369 Homo\_sapiens\_18\_73327166-73328509-HERVHF-3LTR + 18  
73324941 73349877 ENSG00000261780 + 438

18 73329931 73330369 Homo\_sapiens\_18\_73327166-73328509-HERVHF-3LTR + 18  
73324941 73349878 ENSG00000261780 + 438

18 73329931 73330369 Homo\_sapiens\_18\_73327166-73328509-HERVHF-3LTR + 18

73324941 73349879 NONHSAT177989.1 + 438  
 18 73327171 73327950 Homo\_sapiens\_18\_73327166-73328509-HERVHF-pro + 18  
 73324977 73349879 ENSG00000261780 + 779  
 18 73327408 73329488 Homo\_sapiens\_18\_73327166-73328509-HERVHF-pol + 18  
 73324977 73349879 ENSG00000261780 + 2080  
 18 73329931 73330369 Homo\_sapiens\_18\_73327166-73328509-HERVHF-3LTR + 18  
 73324977 73349879 ENSG00000261780 + 438  
 18 73327171 73327950 Homo\_sapiens\_18\_73327166-73328509-HERVHF-pro + 18  
 73325110 73349878 ENSG00000261780 + 779  
 18 73327408 73329488 Homo\_sapiens\_18\_73327166-73328509-HERVHF-pol + 18  
 73325110 73349878 ENSG00000261780 + 2080  
 18 73329931 73330369 Homo\_sapiens\_18\_73327166-73328509-HERVHF-3LTR + 18  
 73325110 73349878 ENSG00000261780 + 438  
 18 73327171 73327950 Homo\_sapiens\_18\_73327166-73328509-HERVHF-pro + 18  
 73326661 73349879 ENSG00000261780 + 779  
 18 73327408 73329488 Homo\_sapiens\_18\_73327166-73328509-HERVHF-pol + 18  
 73326661 73349879 ENSG00000261780 + 2080  
 18 73329931 73330369 Homo\_sapiens\_18\_73327166-73328509-HERVHF-3LTR + 18  
 73326661 73349879 ENSG00000261780 + 438  
 18 73327171 73327950 Homo\_sapiens\_18\_73327166-73328509-HERVHF-pro + 18  
 73326740 73349363 NONHSAT059836.2 + 779  
 18 73327408 73329488 Homo\_sapiens\_18\_73327166-73328509-HERVHF-pol + 18  
 73326740 73349363 NONHSAT059836.2 + 2080  
 18 73329931 73330369 Homo\_sapiens\_18\_73327166-73328509-HERVHF-3LTR + 18  
 73326740 73349363 NONHSAT059836.2 + 438  
 19 22568269 22575022 Homo\_sapiens\_19\_22570768-22572352-HERVHF + 19 22368572  
 22699685 NONHSAG025320.2 + 6753  
 19 22568269 22568753 Homo\_sapiens\_19\_22570768-22572352-HERVHF-5LTR + 19  
 22368572 22699685 NONHSAG025320.2 + 484  
 19 22568269 22575022 Homo\_sapiens\_19\_22570768-22572352-HERVHF + 19 22368572  
 22699682 NONHSAT179569.1 + 6753  
 19 22568269 22568753 Homo\_sapiens\_19\_22570768-22572352-HERVHF-5LTR + 19  
 22368572 22699682 NONHSAT179569.1 + 484  
 19 22571012 22573853 Homo\_sapiens\_19\_22570768-22572352-HERVHF-pol + 19  
 22368572 22699685 NONHSAG025320.2 + 2841  
 19 22571012 22573853 Homo\_sapiens\_19\_22570768-22572352-HERVHF-pol + 19  
 22368572 22699682 NONHSAT179569.1 + 2841  
 19 22574536 22575022 Homo\_sapiens\_19\_22570768-22572352-HERVHF-3LTR + 19  
 22368572 22699685 NONHSAG025320.2 + 486  
 19 22574536 22575022 Homo\_sapiens\_19\_22570768-22572352-HERVHF-3LTR + 19  
 22368572 22699682 NONHSAT179569.1 + 486  
 19 22568269 22575022 Homo\_sapiens\_19\_22570768-22572352-HERVHF + 19 22570138  
 22574983 NONHSAG076047.1 + 4845  
 19 22568269 22575022 Homo\_sapiens\_19\_22570768-22572352-HERVHF + 19 22570138

22574983 NONHSAT179572.1 + 4845

19 22571012 22573853 Homo\_sapiens\_19\_22570768-22572352-HERVHF-pol + 19  
22570138 22574983 NONHSAG076047.1 + 2841

19 22571012 22573853 Homo\_sapiens\_19\_22570768-22572352-HERVHF-pol + 19  
22570138 22574983 NONHSAT179572.1 + 2841

20 12756027 12756350 Homo\_sapiens\_20\_12756400-12757916-HERVHF-gag + 20  
12754218 12764939 NONHSAG031288.2 + 323

20 12756027 12756350 Homo\_sapiens\_20\_12756400-12757916-HERVHF-gag + 20  
12754218 12764881 NONHSAT078656.2 + 323

20 12756779 12758770 Homo\_sapiens\_20\_12756400-12757916-HERVHF-pol + 20  
12754218 12764939 NONHSAG031288.2 + 1991

20 12756779 12758770 Homo\_sapiens\_20\_12756400-12757916-HERVHF-pol + 20  
12754218 12764881 NONHSAT078656.2 + 1991

20 12759162 12759632 Homo\_sapiens\_20\_12756400-12757916-HERVHF-3LTR + 20  
12754218 12764939 NONHSAG031288.2 + 470

20 12759162 12759632 Homo\_sapiens\_20\_12756400-12757916-HERVHF-3LTR + 20  
12754218 12764881 NONHSAT078656.2 + 470

20 40269047 40274769 Homo\_sapiens\_20\_40271576-40272881-HERVHF + 20 40268842  
40282584 NONHSAG081519.1 + 5722

20 40269047 40269508 Homo\_sapiens\_20\_40271576-40272881-HERVHF-5LTR + 20  
40268842 40282584 NONHSAG081519.1 + 461

20 40269047 40274769 Homo\_sapiens\_20\_40271576-40272881-HERVHF + 20 40268842  
40282584 NONHSAT188741.1 + 5722

20 40269047 40269508 Homo\_sapiens\_20\_40271576-40272881-HERVHF-5LTR + 20  
40268842 40282584 NONHSAT188741.1 + 461

20 40271560 40272339 Homo\_sapiens\_20\_40271576-40272881-HERVHF-pro + 20  
40268842 40282584 NONHSAG081519.1 + 779

20 40271560 40272339 Homo\_sapiens\_20\_40271576-40272881-HERVHF-pro + 20  
40268842 40282584 NONHSAT188741.1 + 779

20 40271758 40273720 Homo\_sapiens\_20\_40271576-40272881-HERVHF-pol + 20  
40268842 40282584 NONHSAG081519.1 + 1962

20 40271758 40273720 Homo\_sapiens\_20\_40271576-40272881-HERVHF-pol + 20  
40268842 40282584 NONHSAT188741.1 + 1962

20 40274312 40274769 Homo\_sapiens\_20\_40271576-40272881-HERVHF-3LTR + 20  
40268842 40282584 NONHSAG081519.1 + 457

20 40274312 40274769 Homo\_sapiens\_20\_40271576-40272881-HERVHF-3LTR + 20  
40268842 40282584 NONHSAT188741.1 + 457

21 17124024 17124968 Homo\_sapiens\_21\_17123959-17125734-HERVHF-pro + 21  
17123654 17129309 NONHSAG110806.1 + 944

21 17124024 17124968 Homo\_sapiens\_21\_17123959-17125734-HERVHF-pro + 21  
17123654 17129309 NONHSAT244149.1 + 944

21 17124222 17126293 Homo\_sapiens\_21\_17123959-17125734-HERVHF-pol + 21  
17123654 17129309 NONHSAG110806.1 + 2071

21 17124222 17126293 Homo\_sapiens\_21\_17123959-17125734-HERVHF-pol + 21

|    |                                                                 |   |      |          |
|----|-----------------------------------------------------------------|---|------|----------|
|    | 17123654 17129309 NONHSAT244149.1                               | + | 2071 |          |
| 21 | 17127325 17127764 Homo_sapiens_21_17123959-17125734-HERVHF-3LTR | + | 21   |          |
|    | 17123654 17129309 NONHSAG110806.1                               | + | 439  |          |
| 21 | 17127325 17127764 Homo_sapiens_21_17123959-17125734-HERVHF-3LTR | + | 21   |          |
|    | 17123654 17129309 NONHSAT244149.1                               | + | 439  |          |
| 21 | 26227947 26233485 Homo_sapiens_21_26229594-26231104-HERVHF      | - | 21   | 26228288 |
|    | 26231349 NONHSAG032575.2                                        | - | 3061 |          |
| 21 | 26227947 26233485 Homo_sapiens_21_26229594-26231104-HERVHF      | - | 21   | 26228288 |
|    | 26231349 NONHSAT081534.2                                        | - | 3061 |          |
| 21 | 26228683 26231015 Homo_sapiens_21_26229594-26231104-HERVHF-pol  | - | 21   |          |
|    | 26228288 26231349 NONHSAG032575.2                               | - | 2332 |          |
| 21 | 26228683 26231015 Homo_sapiens_21_26229594-26231104-HERVHF-pol  | - | 21   |          |
|    | 26228288 26231349 NONHSAT081534.2                               | - | 2332 |          |
| 21 | 26230473 26231054 Homo_sapiens_21_26229594-26231104-HERVHF-pro  | - | 21   |          |
|    | 26228288 26231349 NONHSAG032575.2                               | - | 581  |          |
| 21 | 26230473 26231054 Homo_sapiens_21_26229594-26231104-HERVHF-pro  | - | 21   |          |
|    | 26228288 26231349 NONHSAT081534.2                               | - | 581  |          |
| 21 | 42800845 42801294 Homo_sapiens_21_42802518-42804296-HERVHF-5LTR | - | 21   |          |
|    | 42784977 42806191 NONHSAG083198.1                               | - | 449  |          |
| 21 | 42801909 42803999 Homo_sapiens_21_42802518-42804296-HERVHF-pol  | - | 21   |          |
|    | 42784977 42806191 NONHSAG083198.1                               | - | 2090 |          |
| 21 | 42800845 42801294 Homo_sapiens_21_42802518-42804296-HERVHF-5LTR | - | 21   |          |
|    | 42785883 42806191 NONHSAT191544.1                               | - | 449  |          |
| 21 | 42801909 42803999 Homo_sapiens_21_42802518-42804296-HERVHF-pol  | - | 21   |          |
|    | 42785883 42806191 NONHSAT191544.1                               | - | 2090 |          |
| X  | 71264372 71272628 Homo_sapiens_X_71266645-71268493-HERVHF       | + | X    | 71254814 |
|    | 71301168 ENSG00000147140                                        | + | 8256 |          |
| X  | 71264372 71264714 Homo_sapiens_X_71266645-71268493-HERVHF-5LTR  | + | X    |          |
|    | 71254814 71301168 ENSG00000147140                               | + | 342  |          |
| X  | 71266244 71266657 Homo_sapiens_X_71266645-71268493-HERVHF-gag   | + | X    |          |
|    | 71254814 71301168 ENSG00000147140                               | + | 413  |          |
| X  | 71266704 71267651 Homo_sapiens_X_71266645-71268493-HERVHF-pro   | + | X    |          |
|    | 71254814 71301168 ENSG00000147140                               | + | 947  |          |
| X  | 71267253 71269614 Homo_sapiens_X_71266645-71268493-HERVHF-pol   | + | X    |          |
|    | 71254814 71301168 ENSG00000147140                               | + | 2361 |          |
| X  | 71271762 71272124 Homo_sapiens_X_71266645-71268493-HERVHF-env   | + | X    |          |
|    | 71254814 71301168 ENSG00000147140                               | + | 362  |          |
| X  | 71272292 71272628 Homo_sapiens_X_71266645-71268493-HERVHF-3LTR  | + | X    |          |
|    | 71254814 71301168 ENSG00000147140                               | + | 336  |          |
| X  | 71266244 71266657 Homo_sapiens_X_71266645-71268493-HERVHF-gag   | + | X    |          |
|    | 71266029 71301160 ENSG00000147140                               | + | 413  |          |
| X  | 71266704 71267651 Homo_sapiens_X_71266645-71268493-HERVHF-pro   | + | X    |          |
|    | 71266029 71301160 ENSG00000147140                               | + | 947  |          |
| X  | 71267253 71269614 Homo_sapiens_X_71266645-71268493-HERVHF-pol   | + | X    |          |

|   |           |           |                                                |   |      |  |
|---|-----------|-----------|------------------------------------------------|---|------|--|
|   | 71266029  | 71301160  | ENSG00000147140                                | + | 2361 |  |
| X | 71271762  | 71272124  | Homo_sapiens_X_71266645-71268493-HERVHF-env    | + | X    |  |
|   | 71266029  | 71301160  | ENSG00000147140                                | + | 362  |  |
| X | 71272292  | 71272628  | Homo_sapiens_X_71266645-71268493-HERVHF-3LTR   | + | X    |  |
|   | 71266029  | 71301160  | ENSG00000147140                                | + | 336  |  |
| X | 94698818  | 94699270  | Homo_sapiens_X_94700559-94702091-HERVHF-5LTR   | - | X    |  |
|   | 94675774  | 94702415  | NONHSAG054922.2                                | - | 452  |  |
| X | 94698818  | 94699270  | Homo_sapiens_X_94700559-94702091-HERVHF-5LTR   | - | X    |  |
|   | 94675774  | 94702415  | NONHSAT137842.2                                | - | 452  |  |
| X | 94699849  | 94701688  | Homo_sapiens_X_94700559-94702091-HERVHF-pol    | - | X    |  |
|   | 94675774  | 94702415  | NONHSAG054922.2                                | - | 1839 |  |
| X | 94699849  | 94701688  | Homo_sapiens_X_94700559-94702091-HERVHF-pol    | - | X    |  |
|   | 94675774  | 94702415  | NONHSAT137842.2                                | - | 1839 |  |
| X | 94701248  | 94701832  | Homo_sapiens_X_94700559-94702091-HERVHF-pro    | - | X    |  |
|   | 94675774  | 94702415  | NONHSAG054922.2                                | - | 584  |  |
| X | 94701248  | 94701832  | Homo_sapiens_X_94700559-94702091-HERVHF-pro    | - | X    |  |
|   | 94675774  | 94702415  | NONHSAT137842.2                                | - | 584  |  |
| X | 111543806 | 111549675 | Homo_sapiens_X_111546380-111547978-HERVHF      | + | X    |  |
|   | 111511674 | 111621496 | NONHSAG055109.3                                | + | 5869 |  |
| X | 111543806 | 111544260 | Homo_sapiens_X_111546380-111547978-HERVHF-5LTR | + |      |  |
| X | 111511674 | 111621496 | NONHSAG055109.3                                | + | 454  |  |
| X | 111546072 | 111546392 | Homo_sapiens_X_111546380-111547978-HERVHF-gag  | + | X    |  |
|   | 111511674 | 111621496 | NONHSAG055109.3                                | + | 320  |  |
| X | 111546382 | 111547230 | Homo_sapiens_X_111546380-111547978-HERVHF-pro  | + | X    |  |
|   | 111511674 | 111621496 | NONHSAG055109.3                                | + | 848  |  |
| X | 111546688 | 111548769 | Homo_sapiens_X_111546380-111547978-HERVHF-pol  | + | X    |  |
|   | 111511674 | 111621496 | NONHSAG055109.3                                | + | 2081 |  |
| X | 111549221 | 111549675 | Homo_sapiens_X_111546380-111547978-HERVHF-3LTR | + |      |  |
| X | 111511674 | 111621496 | NONHSAG055109.3                                | + | 454  |  |
| X | 111543806 | 111549675 | Homo_sapiens_X_111546380-111547978-HERVHF      | + | X    |  |
|   | 111518074 | 111621496 | NONHSAT138183.2                                | + | 5869 |  |
| X | 111543806 | 111544260 | Homo_sapiens_X_111546380-111547978-HERVHF-5LTR | + |      |  |
| X | 111518074 | 111621496 | NONHSAT138183.2                                | + | 454  |  |
| X | 111546072 | 111546392 | Homo_sapiens_X_111546380-111547978-HERVHF-gag  | + | X    |  |
|   | 111518074 | 111621496 | NONHSAT138183.2                                | + | 320  |  |
| X | 111546382 | 111547230 | Homo_sapiens_X_111546380-111547978-HERVHF-pro  | + | X    |  |
|   | 111518074 | 111621496 | NONHSAT138183.2                                | + | 848  |  |
| X | 111546688 | 111548769 | Homo_sapiens_X_111546380-111547978-HERVHF-pol  | + | X    |  |
|   | 111518074 | 111621496 | NONHSAT138183.2                                | + | 2081 |  |
| X | 111549221 | 111549675 | Homo_sapiens_X_111546380-111547978-HERVHF-3LTR | + |      |  |
| X | 111518074 | 111621496 | NONHSAT138183.2                                | + | 454  |  |
| X | 122227333 | 122227787 | Homo_sapiens_X_122224556-122226109-HERVHF-3LTR | + |      |  |
| X | 122227177 | 122248649 | NONHSAG055239.2                                | + | 454  |  |
| X | 122227333 | 122227787 | Homo_sapiens_X_122224556-122226109-HERVHF-3LTR | + |      |  |



|   |           |           |                  |     |
|---|-----------|-----------|------------------|-----|
| X | 122227177 | 122248649 | NONHSAT138411.2+ | 454 |
|---|-----------|-----------|------------------|-----|
